# Supplementary material for: S-adenosylmethionine synthases specify distinct H3K4me3 populations and gene expression patterns during heat stress
Source: eLife. 2023 Feb 9;12:e79511. doi: 10.7554/eLife.79511 (PMC9984191; doi:10.7554/eLife.79511)
Supplement: Supplementary file 1. — Tabs A-C show sams-3, sams-4, sams-5 (RNAi) RNA seq data then Tabs D-F show WormCat gene enrichment. sams-1 data is from Ding et al., 2018. Enriched categories from WormCat. Red color denoted categories with a p value of less than 0.01. NS is not significant, NV is no value, RGS is regulated gene set. [file elife-79511-supp1.xlsx]

## Sheet: Legend
Supplementary File 1: RNA seq for sam synthase knockdown in basal conditions. Tabs A-C show sams-3, sams-4, sams-5 (RNAi) RNA seq data then Tabs D-F show WormCat gene enrichment. sams-1 data is from Ding, et al. 2018. Enriched categories from WormCat. Red color denoted categories with a p value of less than 0.01 NS is not significant, NV is no value, RGS is regulated gene set.
Index of Tabs:
A. S3.15.out
B. S4.15.out
C. S5.15.out
D. Cat1_all
E. Cat2_all
F. Cat3_all

## Sheet: A. S3.15.out
wormbase_id	gane_name	sequence	ID	EV1	EV2	EV3	sams3_1	sams3_2	sams3_3	padj	log2FoldChange	pvalue	stat	foldChange	log10padj
WBGene00019858		R03H10.6	R03H10.6	41.9247	28.7634	26.7136	912.08	934.948	1139.13	1.52666e-78	4.94801	1.23128e-82	370.835	30.8673	77.8163
WBGene00000989	dhs-26	ZK816.5	ZK816.5	27.5821	19.9131	16.0282	932.521	450.637	212.539	6.9318e-15	4.65682	7.41873e-18	74.1019	25.2257	14.1592
WBGene00015613		C08F1.10	C08F1.10	3.30985	2.21257	2.67136	70.0851	66.3576	60.5922	1	4.58909	1.58608e-12	49.9389	24.0688	NA
WBGene00019675		K12D9.1	K12D9.1	1.10328	2.21257	0.890455	22.3883	14.8562	20.5081	1	3.80362	0.000365359	12.7015	13.9638	NA
WBGene00000695	col-121	F56D5.1	F56D5.1	3.30985	11.0628	0.890455	60.3511	70.3192	56.8634	1	3.65635	1.41794e-06	23.2562	12.6087	NA
WBGene00189995		C06E7.88	C06E7.88	3.30985	3.31885	1.78091	29.2021	43.5781	28.8978	1	3.61724	7.42157e-06	20.0814	12.2715	NA
WBGene00013954		ZK262.9	ZK262.9	1.10328	2.21257	2.67136	18.4947	23.7699	27.9656	1	3.53263	0.000168213	14.1565	11.5725	NA
WBGene00016549		C40A11.6	C40A11.6	1.10328	9.95656	4.45227	61.3245	57.4439	45.6772	1	3.4128	2.13659e-06	22.4681	10.6501	NA
WBGene00011172		R09E10.2	R09E10.2	28.6854	6.63771	7.12364	96.367	306.037	34.4909	0.00141523	3.3709	5.25048e-05	16.3555	10.3452	2.84917
WBGene00018449		F45D11.2	Pseudogene:F45D11.2	5.51641	2.21257	2.67136	15.5745	36.6452	51.2703	1	3.3259	0.000137382	14.5377	10.0276	NA
WBGene00018450		F45D11.3	Pseudogene:F45D11.3	5.51641	2.21257	2.67136	15.5745	36.6452	51.2703	1	3.3259	0.000137382	14.5377	10.0276	NA
WBGene00018451		F45D11.4	Pseudogene:F45D11.4	5.51641	2.21257	2.67136	15.5745	36.6452	51.2703	1	3.3259	0.000137382	14.5377	10.0276	NA
WBGene00019189		H11L12.1	H11L12.1	238.309	189.175	198.571	1809.56	1506.42	2293.18	1.73874e-43	3.16425	4.20696e-47	207.772	8.96469	42.7598
WBGene00013508		Y71A12B.11	Y71A12B.11	7.72298	13.2754	7.12364	79.8191	101.022	64.3209	1	3.13483	3.35537e-09	34.9659	8.7837	NA
WBGene00020362	fbxb-10	T08E11.6	T08E11.6	2.20657	1.10628	1.78091	23.3617	7.92329	12.1184	1	3.08834	0.00742967	7.16604	8.50515	NA
WBGene00008010		C38D9.2	C38D9.2.1	20.9624	14.3817	15.1377	84.6862	116.869	199.488	1.80467e-07	2.99379	9.89735e-10	37.345	7.96562	6.7436
WBGene00019921	fbxc-34	R07C3.5	R07C3.5	2.20657	1.10628	1.78091	17.5213	15.8466	6.52531	1	2.96542	0.0110345	6.45975	7.81053	NA
WBGene00019730	asns-2	M02D8.4	M02D8.4a	708.308	563.099	712.364	5078.25	4598.48	4715.93	5.66395e-73	2.85824	9.13614e-77	343.876	7.25129	72.2469
WBGene00019514		K08B4.2	K08B4.2	3.30985	15.488	4.45227	60.3511	67.348	39.1519	1	2.85773	6.07919e-05	16.0778	7.24876	NA
WBGene00019703	fbxb-41	M01D1.8	M01D1.8	7.72298	11.0628	2.67136	47.6968	62.3959	41.0162	1	2.84093	2.57412e-05	17.709	7.16484	NA
WBGene00044798	tbx-43	Y46E12A.4	Y46E12A.4	1.10328	3.31885	0.890455	7.78723	11.8849	17.7116	1	2.84016	0.0180778	5.58859	7.16098	NA
WBGene00018437	btb-8	F45C12.6	F45C12.6	12.1361	11.0628	4.45227	79.8191	52.4918	59.66	1	2.81647	1.71992e-06	22.885	7.04437	NA
WBGene00012264		W04G5.3	W04G5.3	1.10328	1.10628	0.890455	2.92021	15.8466	1.86437	1	2.73812	0.0948817	2.78954	6.67199	NA
WBGene00017253	sdz-9	F08D12.10	F08D12.10	6.6197	12.1691	8.90455	73.0053	69.3288	41.9484	1	2.73527	2.0605e-06	22.5378	6.65883	NA
WBGene00019042	fbxc-21	F58E1.11	F58E1.11	5.51641	3.31885	0.890455	17.5213	28.7219	16.7794	1	2.72616	0.00477445	7.96295	6.61693	NA
WBGene00016577	clec-3	C41H7.7	C41H7.7	12.1361	16.5943	29.385	163.532	104.984	113.727	9.07507e-07	2.70123	6.14812e-09	33.7872	6.50357	6.04215
WBGene00007962		C35D6.5	Pseudogene:C35D6.5	2.20657	1.10628	0.890455	5.84043	10.8945	10.2541	1	2.70084	0.039508	4.23889	6.50182	NA
WBGene00021525		Y41D4B.26	Y41D4B.26	1.10328	4.42514	3.56182	24.3351	18.8178	14.915	1	2.66736	0.00480574	7.95113	6.35268	NA
WBGene00019927	fbxc-24	R07C3.11	R07C3.11	2.20657	6.63771	5.34273	36.016	34.6644	19.5759	1	2.66349	0.000766572	11.3205	6.33564	NA
WBGene00009041	cut-3	F22B5.3	F22B5.3	28.6854	19.9131	10.6855	128.489	141.629	98.8118	1.32906e-06	2.65199	9.96876e-09	32.8473	6.28533	5.87645
WBGene00015610		C08F1.6	C08F1.6	9.92955	12.1691	3.56182	82.7394	35.6548	39.1519	1	2.63689	0.000179524	14.0341	6.21988	NA
WBGene00019991		R09H3.3	R09H3.3.2	16.5492	6.63771	8.90455	67.1649	60.4151	70.8462	1	2.63501	1.35252e-06	23.347	6.2118	NA
WBGene00235332		K04A8.20	K04A8.20	5.51641	6.63771	0.890455	35.0426	20.7986	23.3047	1	2.63166	0.00319074	8.69505	6.1974	NA
WBGene00016307	fbxc-18	C32B5.14	C32B5.14	7.72298	7.74399	3.56182	40.883	55.463	19.5759	1	2.62192	0.000502785	12.1053	6.1557	NA
WBGene00017601	ets-7	F19F10.5	F19F10.5	3.30985	4.42514	8.01409	41.8564	34.6644	21.4403	1	2.61495	0.000569405	11.8734	6.12603	NA
WBGene00016551		C40A11.8	C40A11.8	6.6197	7.74399	9.795	36.016	47.5397	65.2531	1	2.61457	1.76789e-05	18.4243	6.12439	NA
WBGene00018708	oac-32	F52F10.4	F52F10.4	80.5396	105.097	62.3318	654.128	489.263	345.841	7.1394e-13	2.59036	1.32435e-15	63.877	6.0225	12.1463
WBGene00001080	dpy-21	Y59A8B.1	Y59A8B.1b	9.92955	13.2754	0.890455	21.4149	47.5397	72.7106	1	2.57701	0.00333256	8.61582	5.967	NA
WBGene00001500	ftn-1	C54F6.14	C54F6.14	30.8919	22.1257	42.7418	86.633	175.303	305.757	4.43246e-05	2.56219	6.25599e-07	24.8317	5.90602	4.35336
WBGene00019575		K09E3.4	K09E3.4	3.30985	1.10628	5.34273	15.5745	8.9137	33.5587	1	2.55076	0.013989	6.03953	5.85942	NA
WBGene00018601		F48C1.9	F48C1.9	5.51641	8.85027	4.45227	25.3085	30.7028	53.1347	1	2.54849	0.000431763	12.3895	5.85021	NA
WBGene00044417		C08F1.11	C08F1.11	2.20657	6.63771	2.67136	13.6277	27.7315	24.2369	1	2.52265	0.00538734	7.7446	5.74637	NA
WBGene00021513		Y41D4B.6	Y41D4B.6	1.10328	2.21257	1.78091	11.6809	5.94247	11.1862	1	2.49763	0.0428467	4.10144	5.64758	NA
WBGene00044249		F55B11.6	F55B11.6.1	8.82626	11.0628	4.45227	32.1223	45.5589	56.8634	1	2.48427	0.000140185	14.4997	5.5955	NA
WBGene00015562		C07D8.2	Pseudogene:C07D8.2	2.20657	1.10628	0.890455	5.84043	4.95206	12.1184	1	2.46472	0.0757595	3.1536	5.52021	NA
WBGene00022349		Y82E9BR.17	Y82E9BR.17a	23.1689	32.0822	19.59	149.904	142.619	116.523	2.33579e-08	2.45795	1.01728e-10	41.788	5.49434	7.63157
WBGene00016298	fbxc-14	C32B5.5	C32B5.5	2.20657	4.42514	1.78091	17.5213	17.8274	10.2541	1	2.45374	0.0155421	5.85395	5.47833	NA
WBGene00017259		F08F1.9	F08F1.9	9.92955	6.63771	8.90455	44.7766	39.6165	50.3381	1	2.40132	4.27154e-05	16.7468	5.28288	NA
WBGene00016308		C32B5.15	C32B5.15	2.20657	2.21257	4.45227	15.5745	22.7795	8.38968	1	2.37594	0.0198956	5.42103	5.19074	NA
WBGene00010461		K01D12.1	K01D12.1	4.41313	5.53142	4.45227	16.5479	35.6548	22.3725	1	2.37534	0.00315937	8.71307	5.18856	NA
WBGene00003717	nhr-127	T13F3.3	T13F3.3	6.6197	4.42514	7.12364	26.2819	35.6548	31.6944	1	2.35792	0.000689239	11.518	5.12632	NA
WBGene00002018	hsp-16.41	Y46H3A.2	Y46H3A.2	5.51641	18.8068	9.795	22.3883	129.744	22.3725	1	2.35633	0.00636912	7.44279	5.12066	NA
WBGene00020674		T22B7.7	T22B7.7	1430.96	1205.85	1182.52	7516.63	6665.47	5239.82	3.45077e-35	2.34653	1.11324e-38	169.188	5.08598	34.4621
WBGene00021337		Y34F4.2	Y34F4.2a	103.709	240.064	200.352	955.883	944.852	852.019	5.78058e-13	2.33786	9.32426e-16	64.5683	5.05553	12.238
WBGene00001108	dsl-6	H02I12.4	H02I12.4	3.30985	5.53142	1.78091	19.4681	13.8658	19.5759	1	2.33773	0.0123353	6.26203	5.05506	NA
WBGene00199201		Y71F9AL.19	Y71F9AL.19	1.10328	1.10628	1.78091	6.81383	7.92329	5.59312	1	2.33256	0.0918326	2.84195	5.03699	NA
WBGene00220178		Y52D3.2	Y52D3.2	3.30985	1.10628	1.78091	8.76064	12.8753	9.32187	1	2.3259	0.0468567	3.95053	5.01379	NA
WBGene00011432	sdz-30	T04D3.2	T04D3.2	8.82626	12.1691	5.34273	38.9362	57.4439	33.5587	1	2.31623	0.00031125	13.0015	4.9803	NA
WBGene00017186		F07B7.2	F07B7.2	136.807	111.735	146.035	617.138	545.717	787.698	1.84753e-19	2.30358	1.49006e-22	95.4851	4.93683	18.7334
WBGene00021107		W09B7.2	W09B7.2	136.807	111.735	146.035	617.138	545.717	787.698	1.84753e-19	2.30358	1.49006e-22	95.4851	4.93683	18.7334
WBGene00044472	dct-8	F56D6.10	F56D6.10	3.30985	5.53142	6.23318	6.81383	27.7315	39.1519	1	2.28315	0.01451	5.97501	4.86741	NA
WBGene00017498	pud-4	F15E11.12	F15E11.12a	1697.95	1449.23	747.982	4418.28	7266.65	7249.62	1.83036e-11	2.28182	4.57627e-14	56.9039	4.86293	10.7375
WBGene00012549		Y37D8A.8	Y37D8A.8	1.10328	3.31885	0.890455	1.94681	17.8274	5.59312	1	2.27176	0.120235	2.41425	4.82912	NA
WBGene00008068	sdz-6	C43D7.5	C43D7.5	17.6525	43.1451	20.4805	129.463	139.648	116.523	2.09589e-05	2.25278	2.62007e-07	26.5113	4.76599	4.67863
WBGene00019644	cpt-4	K11D12.4	K11D12.4	51.8543	24.3383	37.3991	178.133	185.207	174.319	5.68639e-08	2.24299	2.7517e-10	39.8433	4.73376	7.24516
WBGene00044471		F56D6.9	F56D6.9	18.7558	6.63771	4.45227	39.9096	41.5973	57.7956	1	2.23872	0.00124573	10.4213	4.71977	NA
WBGene00014067		ZK675.4	ZK675.4	5.51641	11.0628	5.34273	21.4149	44.5685	36.3553	1	2.23236	0.00188598	9.65732	4.69901	NA
WBGene00018021		F34D6.1	F34D6.1	6.6197	3.31885	1.78091	24.3351	18.8178	11.1862	1	2.23215	0.0196739	5.4406	4.69833	NA
WBGene00013280		Y57A10C.1	Y57A10C.1	1.10328	3.31885	1.78091	10.7074	6.93288	11.1862	1	2.22323	0.0629617	3.4576	4.66936	NA
WBGene00010746		K10D11.2	K10D11.2	1.10328	8.85027	1.78091	20.4415	16.837	16.7794	1	2.22195	0.0304271	4.685	4.66522	NA
WBGene00009864		F49B2.4	Pseudogene:F49B2.4	3.30985	1.10628	2.67136	10.7074	16.837	5.59312	1	2.21815	0.0575011	3.60803	4.65297	NA
WBGene00206464		F59C6.18	F59C6.18	6.6197	1.10628	4.45227	12.6543	35.6548	8.38968	1	2.21442	0.0355626	4.41796	4.64096	NA
WBGene00001773	gst-25	F37F2.3	F37F2.3	2.20657	1.10628	2.67136	6.81383	10.8945	10.2541	1	2.20972	0.0647863	3.41041	4.62586	NA
WBGene00044292		F56D6.8	F56D6.8	7.72298	4.42514	0.890455	7.78723	11.8849	39.1519	1	2.19614	0.046566	3.961	4.58253	NA
WBGene00015890		C17C3.5	C17C3.5	3.30985	4.42514	4.45227	14.6011	19.8082	21.4403	1	2.19257	0.0105922	6.53249	4.57119	NA
WBGene00019414	fbxb-51	K05F6.3	K05F6.3	1.10328	2.21257	3.56182	9.73404	11.8849	10.2541	1	2.18933	0.0528764	3.74782	4.56093	NA
WBGene00013484		Y69H2.9	Y69H2.9	66.197	75.2273	61.4414	315.383	294.152	311.351	1.969e-16	2.18562	1.90563e-19	81.3346	4.54923	15.7058
WBGene00019418	fbxb-54	K05F6.7	K05F6.7	9.92955	12.1691	8.90455	48.6702	48.5302	42.8806	1	2.18115	8.09386e-05	15.5362	4.53514	NA
WBGene00018458	fbxb-30	F45D11.13	F45D11.13	3.30985	8.85027	1.78091	19.4681	32.6836	10.2541	1	2.18034	0.0256264	4.98105	4.53261	NA
WBGene00015045	cyp-34A10	B0213.16	B0213.16	13.2394	4.42514	8.90455	37.9628	34.6644	47.5415	1	2.17731	0.000817006	11.2022	4.52308	NA
WBGene00018643	drd-50	F49F1.1	F49F1.1	77.2298	76.3336	124.664	400.069	396.165	459.568	7.4049e-13	2.16737	1.43332e-15	63.7212	4.49203	12.1305
WBGene00019376	lipl-4	K04A8.5	K04A8.5	8.82626	25.4445	16.0282	75.9255	74.2808	74.575	1	2.16148	2.08348e-05	18.1114	4.47373	NA
WBGene00014009	lips-6	ZK617.2	ZK617.2	15.446	4.42514	2.67136	18.4947	68.3384	13.0506	1	2.15938	0.0262742	4.93789	4.46722	NA
WBGene00219795		C02F5.15	C02F5.15	2.20657	2.21257	0.890455	10.7074	6.93288	5.59312	1	2.15005	0.0988938	2.72329	4.43845	NA
WBGene00019415		K05F6.4	K05F6.4	20.9624	19.9131	14.2473	88.5798	78.2425	74.575	1	2.13883	1.03544e-06	23.8611	4.40404	NA
WBGene00000013	abf-2	C50F2.10	C50F2.10	14.3427	16.5943	24.0423	69.1117	65.3671	109.066	1	2.13844	1.01626e-05	19.4806	4.40286	NA
WBGene00000560	cnc-6	Y46E12A.1	Y46E12A.1	1.10328	1.10628	3.56182	8.76064	6.93288	10.2541	1	2.13531	0.088761	2.8967	4.3933	NA
WBGene00020989		W03D8.8	W03D8.8	183.145	159.305	123.773	820.58	716.067	493.127	9.57115e-13	2.12471	1.92982e-15	63.1353	4.36114	12.019
WBGene00017497	irld-32	F15E11.11	F15E11.15b	7735.12	5604.44	2844.11	19197.5	24526.5	26468.5	1.12689e-09	2.11693	3.45364e-12	48.4125	4.33769	8.94812
WBGene00000561	cnd-1	C34E10.7	C34E10.7	5.51641	9.95656	10.6855	36.9894	46.5493	29.83	1	2.10703	0.000980573	10.8639	4.30804	NA
WBGene00016880	fbxb-95	C52E2.1	C52E2.1	3.30985	4.42514	3.56182	15.5745	17.8274	14.915	1	2.09863	0.0191274	5.48983	4.28301	NA
WBGene00009778		F46C5.1	F46C5.1	8.82626	4.42514	8.90455	23.3617	41.5973	29.83	1	2.08924	0.00295187	8.83698	4.25524	NA
WBGene00050903		Y17D7C.4	Pseudogene:Y17D7C.4	20.9624	30.976	13.3568	86.633	128.753	60.5922	0.0013821	2.08825	5.04952e-05	16.4294	4.25232	2.85946
WBGene00017116	fbxb-78	E04A4.1	E04A4.1	1.10328	5.53142	8.01409	25.3085	22.7795	14.915	1	2.08382	0.0221576	5.23337	4.23928	NA
WBGene00019040	fbxb-19	F58E1.9	F58E1.9	2.20657	7.74399	1.78091	19.4681	20.7986	8.38968	1	2.06902	0.0452074	4.01089	4.19602	NA
WBGene00012451		Y17D7B.3	Y17D7B.3	1.10328	2.21257	0.890455	4.86702	7.92329	4.66094	1	2.06758	0.154826	2.02404	4.19182	NA
WBGene00011508		T05H10.3	T05H10.3	58.474	82.9713	16.0282	158.665	303.066	193.895	0.00221531	2.06471	9.40751e-05	15.252	4.18351	2.65456
WBGene00001885	his-11	ZK131.5	ZK131.5	88.2626	98.4593	49.8655	280.34	323.864	377.536	1.81021e-08	2.05982	7.15381e-11	42.4765	4.16935	7.74227
WBGene00017406	sdz-12	F12E12.5	F12E12.5	1.10328	2.21257	1.78091	8.76064	3.96165	8.38968	1	2.0496	0.125136	2.35183	4.1399	NA
WBGene00010296	dgat-2	F59A1.10	F59A1.10	379.529	421.494	362.415	1722.93	1770.86	1302.27	4.05966e-25	2.04406	1.96451e-28	122.32	4.12403	24.3915
WBGene00045460		C15C8.8	C15C8.8	2.20657	3.31885	4.45227	17.5213	11.8849	12.1184	1	2.04378	0.0362842	4.3837	4.12325	NA
WBGene00045486		K05F6.12	K05F6.12	4.41313	7.74399	2.67136	15.5745	31.6932	13.0506	1	2.03845	0.0240021	5.09448	4.10804	NA
WBGene00001883	his-9	ZK131.3	ZK131.3	1.10328	15.488	2.67136	28.2287	13.8658	35.4231	1	2.02227	0.0459934	3.98183	4.06222	NA
WBGene00001887	his-13	ZK131.7	ZK131.7	1.10328	15.488	2.67136	28.2287	13.8658	35.4231	1	2.02227	0.0459934	3.98183	4.06222	NA
WBGene00022215		Y73B3A.13	Y73B3A.13	11.0328	4.42514	8.90455	18.4947	24.7603	54.999	1	2.01031	0.00908591	6.80586	4.02868	NA
WBGene00021491	comt-4	Y40B10A.6	Y40B10A.6	22.0657	35.4011	24.0423	82.7394	99.0411	145.421	0.000165505	2.00891	3.32372e-06	21.62	4.02479	3.78119
WBGene00015538	sams-3	C06E7.1	C06E7.1a	10876.2	8884.57	9720.2	61014.9	51196.3	6419.04	0.100221	2.00862	0.0208794	5.33683	4.02397	0.99904
WBGene00018648		F49F1.8	F49F1.8	7.72298	6.63771	6.23318	18.4947	21.789	41.9484	1	2.00189	0.00759164	7.12736	4.00526	NA
WBGene00010658		K08D8.4	K08D8.4a	301.196	170.368	159.391	921.814	670.508	911.679	9.21434e-10	1.99078	2.67535e-12	48.9133	3.97451	9.03554
WBGene00015933		C17H12.8	C17H12.8	3502.92	3998.11	2509.3	15317.5	15694.1	8632.05	4.26445e-12	1.98576	9.97411e-15	59.9012	3.96071	11.3701
WBGene00019956	fbxb-75	R08C7.13	R08C7.13	5.51641	17.7005	9.795	38.9362	65.3671	26.1012	1	1.98403	0.00423879	8.17858	3.95597	NA
WBGene00019021		F57H12.6	F57H12.6	290.163	181.431	88.155	294.941	1752.04	130.506	0.251959	1.9601	0.0839863	2.98602	3.8909	0.59867
WBGene00018537		F47B7.6	F47B7.6	17.6525	11.0628	13.3568	39.9096	63.3863	59.66	1	1.95507	0.000249287	13.4175	3.87735	NA
WBGene00019035	fbxb-26	F58E1.3	F58E1.3	6.6197	7.74399	6.23318	24.3351	36.6452	18.6437	1	1.95303	0.00752634	7.14285	3.87186	NA
WBGene00011550	T06G6.11	T06G6.11	Pseudogene:T06G6.11	4.41313	11.0628	4.45227	21.4149	29.7123	25.1691	1	1.94802	0.0111972	6.43375	3.85843	NA
WBGene00017252	sdz-10	F08D12.9	F08D12.9	1.10328	7.74399	4.45227	12.6543	17.8274	20.5081	1	1.93939	0.0443502	4.04318	3.83544	NA
WBGene00010105	fbxb-62	F55C9.8	F55C9.8	4.41313	6.63771	4.45227	17.5213	26.7411	14.915	1	1.9367	0.0193016	5.47399	3.8283	NA
WBGene00001105	dsl-3	Y41D4B.10	Y41D4B.10a	7.72298	14.3817	15.1377	40.883	43.5781	58.7278	1	1.93644	0.000654427	11.6144	3.8276	NA
WBGene00020985		W03D8.2	W03D8.2b	7.72298	13.2754	5.34273	21.4149	51.5014	27.0334	1	1.93455	0.00834597	6.95769	3.8226	NA
WBGene00189956		Y34F4.6	Y34F4.6a	8.82626	25.4445	31.1659	79.8191	78.2425	93.2187	1	1.93145	0.000189969	13.9278	3.81438	NA
WBGene00016274		C30G12.2	C30G12.2	1706.78	1097.43	1089.92	5792.73	6035.57	3005.37	2.92288e-09	1.9297	9.4294e-12	46.4436	3.80975	8.53419
WBGene00006557	tbx-38	C24H11.3	C24H11.3	6.6197	3.31885	5.34273	19.4681	26.7411	12.1184	1	1.92934	0.0241833	5.08144	3.8088	NA
WBGene00011668	clec-47	T09F5.9	T09F5.9	281.337	581.905	396.252	2157.06	1473.73	1164.3	4.82609e-08	1.9289	2.21862e-10	40.264	3.80766	7.3164
WBGene00019705	fbxb-45	M01D1.10	M01D1.10	14.3427	25.4445	6.23318	70.0851	60.4151	42.8806	1	1.92743	0.00188246	9.66076	3.80376	NA
WBGene00008673		F11A5.5	F11A5.5b	2.20657	4.42514	3.56182	9.73404	18.8178	10.2541	1	1.926	0.0566626	3.63247	3.80001	NA
WBGene00011362		T02B5.1	T02B5.1	55.1641	55.3142	65.8936	118.755	263.449	286.181	6.14328e-05	1.92034	9.36431e-07	24.0546	3.78512	4.2116
WBGene00010240	gadr-1	F58D2.1	Pseudogene:F58D2.1	1.10328	2.21257	1.78091	3.89362	7.92329	7.4575	1	1.91745	0.158317	1.99023	3.77754	NA
WBGene00001884	his-10	ZK131.4	ZK131.4	12.1361	18.8068	7.12364	41.8564	44.5685	55.9312	1	1.91686	0.00115586	10.5596	3.77599	NA
WBGene00001888	his-14	ZK131.8	ZK131.8	12.1361	18.8068	7.12364	41.8564	44.5685	55.9312	1	1.91686	0.00115586	10.5596	3.77599	NA
WBGene00001900	his-26	ZK131.1	ZK131.1	12.1361	18.8068	7.12364	41.8564	44.5685	55.9312	1	1.91686	0.00115586	10.5596	3.77599	NA
WBGene00022559	fbxb-20	ZC204.9	ZC204.9	4.41313	17.7005	9.795	51.5904	51.5014	16.7794	1	1.91048	0.0123214	6.26402	3.75933	NA
WBGene00019041	fbxc-22	F58E1.10	F58E1.10	1.10328	7.74399	3.56182	14.6011	18.8178	13.0506	1	1.90919	0.0554036	3.6699	3.75598	NA
WBGene00000468	ces-1	F43G9.11	F43G9.11	1.10328	6.63771	9.795	16.5479	25.7507	24.2369	1	1.90502	0.0330186	4.54482	3.74514	NA
WBGene00007358	lact-6	C06A12.5	C06A12.5	5.51641	1.10628	6.23318	3.89362	7.92329	36.3553	1	1.89744	0.111221	2.53678	3.72553	NA
WBGene00021463	zeel-1	Y39G10AR.5	Y39G10AR.5	7.72298	6.63771	7.12364	29.2021	23.7699	27.0334	1	1.89713	0.00574496	7.62861	3.72472	NA
WBGene00022523		ZC132.4	ZC132.4	23.1689	25.4445	13.3568	82.7394	90.1274	55.9312	1	1.89379	9.154e-05	15.3036	3.71609	NA
WBGene00010921	fbxb-4	M117.5	Pseudogene:M117.5	7.72298	23.232	14.2473	39.9096	68.3384	57.7956	1	1.87862	0.00135155	10.2708	3.67723	NA
WBGene00004815	skr-9	C52D10.7	C52D10.7	17.6525	56.4205	9.795	122.649	126.773	55.9312	0.0327144	1.87196	0.00422419	8.18484	3.6603	1.48526
WBGene00012308	oac-53	W06G6.1	W06G6.1	20.9624	18.8068	19.59	75.9255	89.137	51.2703	1	1.8652	6.46214e-05	15.9622	3.64318	NA
WBGene00007875	dod-24	C32H11.12	C32H11.12	798.777	787.674	864.631	3162.59	3375.32	2384.53	2.52699e-23	1.86359	1.42664e-26	113.82	3.63912	22.5974
WBGene00006902	vet-6	F44F1.7	F44F1.7	14.3427	16.5943	13.3568	51.5904	43.5781	65.2531	1	1.86065	0.000278651	13.2087	3.63172	NA
WBGene00000469	ces-2	ZK909.4	ZK909.4	60.6806	58.6331	40.9609	205.388	213.929	160.336	6.20586e-07	1.86028	3.95405e-09	34.6462	3.63079	6.2072
WBGene00020537	fbxb-37	T16A1.8	T16A1.8	12.1361	19.9131	15.1377	67.1649	53.4822	50.3381	1	1.85855	0.000218903	13.6614	3.62644	NA
WBGene00017408	sdz-11	F12E12.7	F12E12.7	4.41313	9.95656	1.78091	20.4415	28.7219	8.38968	1	1.84999	0.0600451	3.53614	3.60498	NA
WBGene00008812		F14F7.5	F14F7.5b	15.446	4.42514	7.12364	23.3617	43.5781	29.83	1	1.84708	0.0118604	6.33161	3.5977	NA
WBGene00011475		T05D4.2	T05D4.2	16.5492	18.8068	22.2614	90.5266	63.3863	53.1347	1	1.84022	0.000120272	14.7884	3.58064	NA
WBGene00044047		Y57A10C.11	Y57A10C.11	1.10328	6.63771	0.890455	6.81383	21.789	1.86437	1	1.83466	0.195263	1.67746	3.56687	NA
WBGene00000133	amt-1	C05E11.4	C05E11.4	176.525	160.411	103.293	571.388	416.963	577.024	4.39017e-09	1.83426	1.59334e-11	45.4159	3.56589	8.35752
WBGene00077663		F55C9.14	F55C9.14	3.30985	1.10628	2.67136	9.73404	11.8849	3.72875	1	1.83188	0.141679	2.15963	3.56	NA
WBGene00014457		MTCE.10	MTCE.10	5.51641	13.2754	3.56182	9.73404	32.6836	36.3553	1	1.83038	0.0377474	4.31637	3.5563	NA
WBGene00015042	cyp-34A7	B0213.12	B0213.12	23.1689	30.976	65.0032	63.2713	109.936	245.165	0.0191326	1.80579	0.00195508	9.59124	3.49619	1.71822
WBGene00008016		C38D9.8	C38D9.8	3.30985	8.85027	5.34273	23.3617	22.7795	14.915	1	1.80482	0.0280825	4.82299	3.49386	NA
WBGene00007867		C32H11.4	C32H11.4	316.642	356.224	291.179	1181.71	1182.55	996.508	2.5651e-22	1.80291	1.65503e-25	108.961	3.48924	21.5909
WBGene00018460		F45D11.15	F45D11.15	172.112	324.141	537.835	946.149	1173.64	1485.91	3.0684e-05	1.80005	4.13278e-07	25.6313	3.48233	4.51309
WBGene00018461		F45D11.16	F45D11.16	172.112	324.141	537.835	946.149	1173.64	1485.91	3.0684e-05	1.80005	4.13278e-07	25.6313	3.48233	4.51309
WBGene00011669		T09F5.10	T09F5.10	11.0328	2.21257	6.23318	12.6543	47.5397	7.4575	1	1.79538	0.0785031	3.09562	3.47107	NA
WBGene00021083		W08E12.2	W08E12.2	3.30985	3.31885	2.67136	3.89362	20.7986	7.4575	1	1.79232	0.124731	2.35688	3.46372	NA
WBGene00044733		W08F4.13	W08F4.13	5.51641	1.10628	2.67136	14.6011	9.90411	7.4575	1	1.78566	0.112808	2.51443	3.44776	NA
WBGene00044976		T26H2.10	Pseudogene:T26H2.10	3.30985	4.42514	0.890455	10.7074	12.8753	5.59312	1	1.78015	0.131219	2.27802	3.43462	NA
WBGene00045202	Y64G10A.13	Y64G10A.13	Pseudogene:Y64G10A.13	3.30985	2.21257	2.67136	6.81383	13.8658	7.4575	1	1.77948	0.115301	2.48001	3.43303	NA
WBGene00000662	col-87	Y39G8C.4	Y39G8C.4	5.51641	1.10628	2.67136	11.6809	7.92329	12.1184	1	1.77612	0.111295	2.53573	3.42504	NA
WBGene00013100	zip-7	Y51H4A.4	Y51H4A.4b	7.72298	11.0628	1.78091	13.6277	26.7411	28.8978	1	1.7716	0.0444749	4.03844	3.41433	NA
WBGene00020205	arrd-1	T04B8.3	T04B8.3	3.30985	3.31885	10.6855	23.3617	21.789	14.915	1	1.7688	0.0420817	4.13192	3.4077	NA
WBGene00044212		Y68A4A.13	Y68A4A.13	3.30985	4.42514	1.78091	8.76064	16.837	6.52531	1	1.7688	0.109306	2.56423	3.4077	NA
WBGene00005932	srx-41	F59B1.7	F59B1.7	5.51641	1.10628	3.56182	10.7074	9.90411	13.9828	1	1.76288	0.0982016	2.73451	3.39374	NA
WBGene00010033		F54B11.10	F54B11.10	6.6197	15.488	7.12364	31.1489	37.6356	29.83	1	1.76249	0.0081195	7.00692	3.39282	NA
WBGene00200308		C56C10.15	C56C10.15	6.6197	1.10628	1.78091	5.84043	14.8562	11.1862	1	1.75852	0.136892	2.21255	3.38351	NA
WBGene00014838	cyp-13A9	T10B9.6	Pseudogene:T10B9.6	17.6525	46.4639	44.5227	97.3404	104.984	165.929	0.00328059	1.75765	0.000165895	14.1826	3.38146	2.48405
WBGene00000749	col-176	ZC373.7	ZC373.7	935.584	232.32	261.794	862.436	3636.79	320.672	0.316139	1.75339	0.118383	2.43858	3.37149	0.500122
WBGene00019704	fbxb-40	M01D1.9	M01D1.9	3.30985	16.5943	4.45227	33.0957	24.7603	23.3047	1	1.74789	0.0341381	4.48777	3.35867	NA
WBGene00189954		F40G9.18	F40G9.18	1.10328	5.53142	1.78091	7.78723	9.90411	10.2541	1	1.74441	0.139758	2.18063	3.35059	NA
WBGene00002085	ins-2	ZK75.2	ZK75.2	12.1361	27.6571	8.01409	51.5904	64.3767	42.8806	1	1.74367	0.00439614	8.11249	3.34885	NA
WBGene00022439		Y110A2AL.2	Y110A2AL.2	5.51641	1.10628	5.34273	18.4947	0.990411	20.5081	1	1.73483	0.173022	1.85656	3.3284	NA
WBGene00002016	hsp-16.2	Y46H3A.3	Y46H3A.3a	11.0328	6.63771	8.90455	23.3617	44.5685	20.5081	1	1.73324	0.0146025	5.9638	3.32473	NA
WBGene00017060		D2063.1	D2063.1	14.3427	13.2754	23.1518	69.1117	51.5014	49.4059	1	1.73257	0.000734492	11.3999	3.32319	NA
WBGene00195168		T13C5.9	T13C5.9	13.2394	4.42514	2.67136	6.81383	57.4439	2.79656	1	1.72852	0.154601	2.02626	3.31388	NA
WBGene00009410		F35E2.2	F35E2.2	2.20657	5.53142	0.890455	9.73404	11.8849	6.52531	1	1.72758	0.149421	2.07815	3.31172	NA
WBGene00001483	fog-3	C03C11.2	C03C11.2	81.6429	39.8262	38.2896	154.771	237.699	135.167	0.00106402	1.72752	3.56199e-05	17.0916	3.31157	2.97305
WBGene00013100	zip-7	Y51H4A.4	Y51H4A.4a	26.4788	26.5508	31.1659	112.915	86.1658	80.1681	0.000466924	1.72615	1.24162e-05	19.0982	3.30845	3.33075
WBGene00015893		C17C3.11	C17C3.11.2	2.20657	1.10628	0.890455	0.973404	11.8849	0.932187	1	1.72175	0.335713	0.926733	3.29837	NA
WBGene00009016		F21D9.2	F21D9.2	27.5821	6.63771	13.3568	38.9362	95.0795	22.3725	1	1.71822	0.0227783	5.18534	3.2903	NA
WBGene00011295		R102.8	R102.8	8.82626	7.74399	2.67136	16.5479	39.6165	6.52531	1	1.71565	0.0793348	3.07848	3.28445	NA
WBGene00206416		W04H10.5	W04H10.5	7.72298	7.74399	1.78091	14.6011	17.8274	23.3047	1	1.71332	0.055085	3.67951	3.27914	NA
WBGene00019375		K04A8.3	K04A8.3	4.41313	2.21257	6.23318	12.6543	17.8274	12.1184	1	1.712	0.069173	3.30254	3.27616	NA
WBGene00009297	sdz-16	F31E9.4	F31E9.4	1.10328	11.0628	4.45227	19.4681	20.7986	13.9828	1	1.7118	0.0760601	3.14714	3.27568	NA
WBGene00044475		F56D6.13	F56D6.13	9.92955	5.53142	2.67136	10.7074	44.5685	3.72875	1	1.71114	0.12259	2.38392	3.27419	NA
WBGene00010658		K08D8.4	K08D8.4f	90.4692	69.6959	83.7027	323.17	267.411	207.878	4.22283e-07	1.71016	2.48622e-09	35.5497	3.27196	6.3744
WBGene00194716	ZK637.18	ZK637.18	Pseudogene:ZK637.18	2.20657	3.31885	2.67136	5.84043	6.93288	13.9828	1	1.70942	0.13927	2.18601	3.27029	NA
WBGene00219460		K09H9.9	K09H9.9	1.10328	2.21257	1.78091	3.89362	10.8945	1.86437	1	1.70382	0.25527	1.29423	3.25762	NA
WBGene00019243	fbxb-72	H24O09.2	H24O09.2	4.41313	13.2754	10.6855	30.1755	29.7123	32.6266	1	1.70152	0.0122439	6.2752	3.25244	NA
WBGene00044474		F56D6.12	F56D6.12	4.41313	1.10628	0.890455	5.84043	13.8658	0.932187	1	1.70016	0.267435	1.22986	3.24937	NA
WBGene00008617		F09C6.3	F09C6.3	1.10328	6.63771	0.890455	9.73404	2.97123	14.915	1	1.69858	0.205539	1.60257	3.24581	NA
WBGene00021774	fbxb-43	Y51H7BR.2	Y51H7BR.2	4.41313	6.63771	5.34273	11.6809	23.7699	17.7116	1	1.69775	0.0443327	4.04385	3.24396	NA
WBGene00206414		F31D5.7	F31D5.7	5.51641	9.95656	3.56182	17.5213	27.7315	15.8472	1	1.69543	0.04075	4.18638	3.23874	NA
WBGene00006544	tbx-7	ZK328.8	ZK328.8.2	14.3427	3.31885	2.67136	17.5213	29.7123	17.7116	1	1.68942	0.0649128	3.40719	3.22527	NA
WBGene00044694	fbxb-90	F12E12.10	F12E12.10	7.72298	13.2754	4.45227	17.5213	39.6165	24.2369	1	1.6894	0.0281119	4.82119	3.22522	NA
WBGene00020664		T21H3.5	T21H3.5	2.20657	3.31885	1.78091	1.94681	16.837	4.66094	1	1.68821	0.215938	1.53116	3.22256	NA
WBGene00044692	fbxb-91	F12E12.8	F12E12.8	15.446	30.976	24.9327	80.7926	98.0507	51.2703	1	1.68748	0.000615559	11.7283	3.22094	NA
WBGene00007507		C10C5.3	C10C5.3	269.201	168.155	115.759	755.362	582.362	432.535	4.35179e-05	1.68079	6.07193e-07	24.8893	3.20602	4.36133
WBGene00021081		W08A12.4	W08A12.4	2.20657	8.85027	4.45227	21.4149	18.8178	9.32187	1	1.67914	0.0750516	3.16893	3.20238	NA
WBGene00018452		F45D11.5	F45D11.5	3.30985	7.74399	0.890455	14.6011	10.8945	12.1184	1	1.67818	0.12059	2.40964	3.20024	NA
WBGene00012239		W04A8.4	W04A8.4	171.009	172.58	186.105	533.426	681.403	481.009	4.24687e-12	1.67758	9.59048e-15	59.9784	3.19891	11.3719
WBGene00018065		F35F11.2	F35F11.2	8.82626	6.63771	4.45227	17.5213	30.7028	14.915	1	1.67369	0.0374929	4.32788	3.1903	NA
WBGene00009230	oac-18	F28G4.5	Pseudogene:F28G4.5	2.20657	2.21257	1.78091	2.92021	15.8466	0.932187	1	1.66867	0.273685	1.19818	3.17922	NA
WBGene00004052	parg-2	H23L24.5	H23L24.5	35.3051	28.7634	19.59	68.1383	103.003	93.2187	0.00270458	1.66759	0.000125964	14.7012	3.17683	2.5679
WBGene00017706		F22E5.7	F22E5.7	1.10328	4.42514	0.890455	4.86702	3.96165	11.1862	1	1.66192	0.235043	1.41008	3.16437	NA
WBGene00014977		ZC15.4	Pseudogene:ZC15.4	12.1361	19.9131	17.8091	50.617	44.5685	62.4565	1	1.65923	0.00115366	10.5631	3.15849	NA
WBGene00044978		F58D2.3	F58D2.3	1.10328	3.31885	2.67136	5.84043	12.8753	3.72875	1	1.65564	0.200174	1.6411	3.15064	NA
WBGene00219657	linc-139	C33F10.25	WBGene00219657	1.10328	1.10628	3.56182	3.89362	10.8945	3.72875	1	1.65206	0.243821	1.35836	3.14281	NA
WBGene00007946	ugt-33	C35A5.2	C35A5.2	20.9624	21.0194	11.5759	54.5106	70.3192	41.9484	1	1.64766	0.00183955	9.70313	3.13326	NA
WBGene00045457		F33H12.7	F33H12.7	19.8591	19.9131	18.6995	89.5532	31.6932	61.5244	1	1.6455	0.00297368	8.82355	3.12856	NA
WBGene00008602	oac-14	F09B9.1	F09B9.1	52.9576	65.2708	74.7982	181.053	207.986	215.335	1.18249e-06	1.64258	8.20179e-09	33.2267	3.12225	5.9272
WBGene00011427		T04C12.1	T04C12.1	11.0328	14.3817	7.12364	32.1223	42.5877	26.1012	1	1.64113	0.0105164	6.54526	3.1191	NA
WBGene00021137		W10G11.4	W10G11.4	5.51641	11.0628	7.12364	29.2021	29.7123	14.915	1	1.64113	0.0289468	4.77077	3.1191	NA
WBGene00017764		F25A2.1	F25A2.1	13.2394	25.4445	25.8232	85.6596	51.5014	64.3209	1	1.63823	0.0010063	10.8159	3.11283	NA
WBGene00003095	lys-6	F58B3.3	F58B3.3	94.8823	110.628	91.7168	364.053	329.807	227.454	6.37393e-07	1.63313	4.26677e-09	34.4981	3.10186	6.19559
WBGene00206536		C14A6.16	Pseudogene:C14A6.16	4.41313	5.53142	4.45227	11.6809	19.8082	13.0506	1	1.63118	0.0663147	3.37196	3.09767	NA
WBGene00016912	clec-86	C54D1.2	C54D1.2	99.2955	133.86	80.1409	297.862	387.251	281.521	1.59491e-06	1.62909	1.26059e-08	32.3911	3.09318	5.79726
WBGene00020609		T20D4.3	T20D4.3	52.9576	29.8697	7.12364	72.0319	143.61	60.5922	0.0809419	1.62647	0.0151999	5.89315	3.08757	1.09183
WBGene00001899	his-25	ZK131.2	ZK131.2	97.0889	50.8891	81.0314	186.894	257.507	261.945	4.74811e-05	1.62393	6.93128e-07	24.6341	3.08213	4.32348
WBGene00219655	linc-107	C30G12.8	WBGene00219655	5.51641	2.21257	3.56182	11.6809	11.8849	11.1862	1	1.6235	0.103617	2.64896	3.08121	NA
WBGene00010989		R03D7.2	R03D7.2	1045.91	659.345	780.929	2490.94	2333.41	2832.92	3.1695e-13	1.62318	4.60125e-16	65.9602	3.08053	12.499
WBGene00004000	pgp-6	T21E8.1	T21E8.1c	698.378	371.711	446.118	1529.22	1907.53	1231.42	1.87724e-07	1.62278	1.04468e-09	37.2397	3.07967	6.72648
WBGene00008958		F19H6.3	F19H6.3	8.82626	3.31885	8.90455	20.4415	13.8658	30.7622	1	1.62161	0.0466617	3.95755	3.07717	NA
WBGene00012754		Y41C4A.7	Y41C4A.7	9.92955	3.31885	7.12364	10.7074	45.5589	6.52531	1	1.62118	0.108322	2.57853	3.07627	NA
WBGene00017755	zip-8	F23F12.9	F23F12.9a	48.5444	74.121	82.8123	196.628	240.67	196.691	1.32998e-05	1.62091	1.44807e-07	27.6575	3.0757	4.87616
WBGene00013583	ceh-51	Y80D3A.3	Y80D3A.3	1.10328	2.21257	2.67136	6.81383	9.90411	1.86437	1	1.62051	0.249633	1.32536	3.07483	NA
WBGene00014149	fbxb-70	ZK909.5	ZK909.5	6.6197	4.42514	2.67136	12.6543	19.8082	9.32187	1	1.61908	0.0904416	2.8665	3.07179	NA
WBGene00020394		T10B5.8	T10B5.8	131.291	127.223	105.964	408.83	388.241	319.74	9.21434e-10	1.61796	2.66942e-12	48.9176	3.06941	9.03554
WBGene00022616	hsd-3	ZC449.6	ZC449.6	4.41313	1.10628	1.78091	5.84043	9.90411	6.52531	1	1.61722	0.199836	1.64357	3.06784	NA
WBGene00086562		T02G6.11	T02G6.11	1.10328	2.21257	3.56182	11.6809	5.94247	3.72875	1	1.61516	0.215627	1.53324	3.06346	NA
WBGene00006665	twk-10	K04A8.4	K04A8.4	15.446	7.74399	16.0282	41.8564	57.4439	20.5081	1	1.60455	0.0158042	5.82453	3.04101	NA
WBGene00019391	irld-11	K04F1.12	K04F1.12a	1.10328	2.21257	2.67136	6.81383	5.94247	5.59312	1	1.60322	0.223361	1.48265	3.03822	NA
WBGene00018766		F53G2.1	F53G2.1	4.41313	15.488	10.6855	29.2021	35.6548	27.9656	1	1.60011	0.0205998	5.36034	3.03167	NA
WBGene00016578	sdz-5	C41H7.8	C41H7.8	12.1361	33.1885	14.2473	70.0851	63.3863	45.6772	1	1.59445	0.00454963	8.05029	3.01978	NA
WBGene00019831		R02F2.1	R02F2.1c.2	4650.34	3426.16	4004.37	12102.3	9668.4	14687.5	1.09475e-13	1.59354	1.50099e-16	68.1686	3.0179	12.9607
WBGene00015690		C10G11.10	C10G11.10	4.41313	5.53142	0.890455	3.89362	23.7699	4.66094	1	1.59308	0.211395	1.56185	3.01693	NA
WBGene00007229		C01G6.9	C01G6.9	6.6197	13.2754	15.1377	36.9894	52.4918	16.7794	1	1.59282	0.0249225	5.02926	3.01638	NA
WBGene00014672		C08F11.6	Pseudogene:C08F11.6	5.51641	26.5508	12.4664	43.8032	36.6452	53.1347	1	1.58879	0.0167425	5.72317	3.00797	NA
WBGene00003977	pes-2.1	F56G4.2	F56G4.2	90.4692	172.58	69.4555	388.388	394.184	214.403	0.00141451	1.58717	5.23637e-05	16.3606	3.00459	2.8494
WBGene00010158	pes-2.2	F56G4.3	F56G4.3	90.4692	172.58	69.4555	388.388	394.184	214.403	0.00141451	1.58717	5.23637e-05	16.3606	3.00459	2.8494
WBGene00008102		C44H9.7	C44H9.7b	9.92955	11.0628	13.3568	39.9096	33.674	29.83	1	1.58433	0.00745067	7.16097	2.99869	NA
WBGene00017185		F07B7.1	F07B7.1	12.1361	19.9131	16.0282	42.8298	41.5973	59.66	1	1.5843	0.00277816	8.94772	2.99861	NA
WBGene00021106		W09B7.1	W09B7.1	12.1361	19.9131	16.0282	42.8298	41.5973	59.66	1	1.5843	0.00277816	8.94772	2.99861	NA
WBGene00007766		C27C7.1	C27C7.1	6178.38	4549.04	5899.26	16830.2	13625.1	19352.2	6.9318e-15	1.58282	7.82686e-18	73.9962	2.99555	14.1592
WBGene00016088	clec-266	C25B8.4	C25B8.4b	247.135	252.233	194.119	748.548	740.828	584.481	1.02978e-11	1.58248	2.49161e-14	58.0997	2.99485	10.9873
WBGene00021458		Y39G10AL.1	Y39G10AL.1a	17.6525	33.1885	18.6995	63.2713	90.1274	54.0669	1	1.58112	0.00138172	10.23	2.99201	NA
WBGene00020285		T06A10.2	T06A10.2	5.51641	1.10628	2.67136	5.84043	6.93288	14.915	1	1.58053	0.184712	1.7593	2.99079	NA
WBGene00018606		F48E3.6	F48E3.6	24.2722	47.5702	21.3709	105.128	105.974	66.1853	0.010617	1.57866	0.00084258	11.145	2.98692	1.974
WBGene00001756	gst-8	F11G11.1	F11G11.1	4.41313	4.42514	5.34273	8.76064	15.8466	17.7116	1	1.57357	0.0846259	2.97374	2.9764	NA
WBGene00044314	fbxb-33	M151.8	M151.8	6.6197	5.53142	2.67136	20.4415	13.8658	9.32187	1	1.57095	0.0934548	2.81383	2.971	NA
WBGene00019208	lips-14	H17B01.3	H17B01.3	124.671	158.199	92.6073	343.612	436.771	330.926	1.46596e-06	1.56922	1.11138e-08	32.636	2.96744	5.83388
WBGene00021999	thn-5	Y59E9AR.4	Y59E9AR.4	5.51641	2.21257	1.78091	2.92021	13.8658	11.1862	1	1.56903	0.196817	1.66584	2.96705	NA
WBGene00016071		C24H12.1	C24H12.1	5.51641	18.8068	15.1377	47.6968	43.5781	26.1012	1	1.56853	0.0176138	5.63415	2.96603	NA
WBGene00021580	clec-174	Y46C8AL.2	Y46C8AL.2	3.30985	1.10628	1.78091	5.84043	4.95206	7.4575	1	1.56384	0.239626	1.38279	2.95639	NA
WBGene00219649	linc-55	C10F3.18	WBGene00219649	1.10328	1.10628	3.56182	9.73404	2.97123	4.66094	1	1.56178	0.275208	1.1906	2.95218	NA
WBGene00012745		Y40H7A.7	Pseudogene:Y40H7A.7	17.6525	14.3817	20.4805	40.883	57.4439	56.8634	1	1.55823	0.00189612	9.64748	2.94492	NA
WBGene00022112		Y71F9AL.7	Y71F9AL.7	13.2394	8.85027	8.01409	36.9894	26.7411	24.2369	1	1.55283	0.0179365	5.60234	2.93393	NA
WBGene00195962		ZK973.13	ZK973.13	25.3755	7.74399	21.3709	29.2021	33.674	96.9475	1	1.55063	0.026919	4.896	2.92946	NA
WBGene00196043		ZK973.14	ZK973.14	25.3755	7.74399	21.3709	29.2021	33.674	96.9475	1	1.55063	0.026919	4.896	2.92946	NA
WBGene00197673		ZK973.17	ZK973.17	25.3755	7.74399	21.3709	29.2021	33.674	96.9475	1	1.55063	0.026919	4.896	2.92946	NA
WBGene00199244		ZK973.20	ZK973.20	25.3755	7.74399	21.3709	29.2021	33.674	96.9475	1	1.55063	0.026919	4.896	2.92946	NA
WBGene00202259		ZK973.25	ZK973.25	25.3755	7.74399	21.3709	29.2021	33.674	96.9475	1	1.55063	0.026919	4.896	2.92946	NA
WBGene00008557		F07H5.6	F07H5.6	1.10328	4.42514	1.78091	5.84043	7.92329	7.4575	1	1.54716	0.221682	1.49345	2.92242	NA
WBGene00019788		M116.1	M116.1	33.0985	58.6331	32.9468	134.33	136.677	92.2865	0.00251263	1.54687	0.000113421	14.899	2.92184	2.59987
WBGene00019791	sdz-25	M116.4	M116.4	33.0985	58.6331	32.9468	134.33	136.677	92.2865	0.00251263	1.54687	0.000113421	14.899	2.92184	2.59987
WBGene00010100		F55C9.3	F55C9.3.2	12.1361	25.4445	4.45227	40.883	61.4055	19.5759	1	1.54644	0.0462207	3.97353	2.92096	NA
WBGene00019316	K02E7.12	K02E7.12	K02E7.12.1	2.20657	3.31885	1.78091	7.78723	5.94247	7.4575	1	1.54622	0.204714	1.60842	2.92051	NA
WBGene00077593		C49G7.12	C49G7.12	20.9624	39.8262	16.9186	96.367	69.3288	59.66	1	1.54334	0.00208	9.47756	2.91468	NA
WBGene00044024		C35A5.11	C35A5.11a	30.8919	25.4445	21.3709	46.7234	111.916	67.1175	1	1.54186	0.00208862	9.46997	2.91169	NA
WBGene00008301	dct-3	C54D10.7	C54D10.7	1.10328	4.42514	4.45227	5.84043	17.8274	5.59312	1	1.54061	0.194006	1.68693	2.90917	NA
WBGene00219296		C54C6.11	C54C6.11	1.10328	1.10628	1.78091	0.973404	7.92329	2.79656	1	1.53768	0.366852	0.8143	2.90328	NA
WBGene00020073	sdz-28	R52.1	R52.1	51.8543	105.097	45.4132	234.59	226.804	123.981	0.00499431	1.53599	0.000291224	13.126	2.89987	2.30152
WBGene00086565		W06G6.17	W06G6.17	18.7558	28.7634	8.90455	64.2447	60.4151	37.2875	1	1.53187	0.00961154	6.70551	2.8916	NA
WBGene00016309	sdz-4	C32B5.16	C32B5.16	7.72298	38.7199	18.6995	76.8989	62.3959	48.4737	1	1.52953	0.0131803	6.14474	2.88692	NA
WBGene00044383		T05A7.11	T05A7.11	7.72298	16.5943	16.9186	42.8298	46.5493	29.83	1	1.52471	0.0111469	6.44175	2.87728	NA
WBGene00019886		R05D8.9	R05D8.9	12.1361	13.2754	12.4664	20.4415	26.7411	61.5244	1	1.52282	0.0246245	5.0501	2.87352	NA
WBGene00013856		ZC168.2	ZC168.2	3.30985	2.21257	8.01409	16.5479	9.90411	13.0506	1	1.52232	0.122547	2.38447	2.87253	NA
WBGene00004054		AC8.1	Pseudogene:AC8.1	125.774	69.6959	85.4836	282.287	198.082	325.333	0.000168981	1.52142	3.40715e-06	21.5724	2.87074	3.77216
WBGene00194917		Y45F10B.59	Y45F10B.59	2.20657	1.10628	2.67136	4.86702	4.95206	7.4575	1	1.51847	0.258597	1.27625	2.86486	NA
WBGene00000397	cdh-5	F08B4.2	F08B4.2d	184.248	65.2708	144.254	297.862	341.692	487.534	0.001519	1.51653	5.7752e-05	16.175	2.86102	2.81844
WBGene00003595	ngn-1	Y69A2AR.29	Y69A2AR.29	12.1361	3.31885	7.12364	22.3883	18.8178	23.3047	1	1.51621	0.054974	3.68288	2.86038	NA
WBGene00017213		F07E5.8	F07E5.8	18.7558	3.31885	1.78091	12.6543	49.5206	5.59312	1	1.51555	0.186006	1.74897	2.85909	NA
WBGene00016553		C40A11.10	C40A11.10.2	14.3427	33.1885	14.2473	60.3511	74.2808	41.0162	1	1.51358	0.0070135	7.26951	2.85517	NA
WBGene00016892		C53A3.2	C53A3.2	847.321	910.472	1134.44	2951.36	3018.77	2289.45	1.03187e-13	1.51302	1.33155e-16	68.4048	2.85407	12.9864
WBGene00017296		F09E10.6	F09E10.6	4.41313	7.74399	9.795	25.3085	23.7699	13.9828	1	1.51151	0.0528794	3.74773	2.85109	NA
WBGene00018946		F56C3.9	F56C3.9	26.4788	37.6137	28.4945	81.766	74.2808	107.202	0.00370618	1.51027	0.000194304	13.8854	2.84864	2.43107
WBGene00021719	fbxb-104	Y49F6B.7	Y49F6B.7	2.20657	5.53142	0.890455	9.73404	7.92329	6.52531	1	1.5082	0.220512	1.50104	2.84455	NA
WBGene00014914	Y52B11A.11	Y52B11A.11	Pseudogene:Y52B11A.11	6.6197	5.53142	4.45227	23.3617	5.94247	17.7116	1	1.50796	0.107522	2.59027	2.84407	NA
WBGene00001103	dsl-1	W09G12.4	W09G12.4	6.6197	9.95656	4.45227	26.2819	24.7603	8.38968	1	1.50714	0.0805957	3.05285	2.84245	NA
WBGene00009338		F32G8.2	F32G8.2	1.10328	3.31885	2.67136	3.89362	7.92329	8.38968	1	1.50659	0.239993	1.38064	2.84138	NA
WBGene00017979		F32B5.6	F32B5.6l	15.446	32.0822	37.3991	92.4734	69.3288	80.1681	1	1.50354	0.00120967	10.4755	2.83538	NA
WBGene00006938	wee-1.1	F35H8.7	F35H8.7	3.30985	8.85027	6.23318	16.5479	18.8178	16.7794	1	1.50283	0.0697701	3.28842	2.83398	NA
WBGene00020944		W02D7.9	W02D7.9	1.10328	4.42514	2.67136	11.6809	3.96165	7.4575	1	1.49563	0.230763	1.43615	2.81987	NA
WBGene00219708	linc-13	K02E7.14	WBGene00219708	2.20657	1.10628	1.78091	2.92021	3.96165	7.4575	1	1.49324	0.309621	1.03229	2.81521	NA
WBGene00010102		F55C9.5	F55C9.5	4.41313	11.0628	2.67136	20.4415	20.7986	9.32187	1	1.49189	0.111206	2.53699	2.81258	NA
WBGene00016785		C49G7.7	C49G7.7	14.3427	28.7634	14.2473	78.8457	41.5973	40.084	1	1.49025	0.00991646	6.64984	2.80937	NA
WBGene00235338		C24H12.19	Pseudogene:C24H12.19	1.10328	2.21257	0.890455	6.81383	3.96165	0.932187	1	1.48701	0.378645	0.775095	2.80307	NA
WBGene00044567		C46C11.4	C46C11.4	6.6197	9.95656	11.5759	29.2021	26.7411	23.3047	1	1.48553	0.0260639	4.95177	2.8002	NA
WBGene00045393		F26D11.13	F26D11.13	1.10328	3.31885	4.45227	12.6543	4.95206	7.4575	1	1.48268	0.215992	1.5308	2.79467	NA
WBGene00019532		K08D10.9	Pseudogene:K08D10.9	33.0985	18.8068	23.1518	78.8457	78.2425	52.2025	1	1.48062	0.00144905	10.1423	2.79068	NA
WBGene00008290	bgnt-1.8	C54C8.2	C54C8.2	6.6197	2.21257	1.78091	7.78723	18.8178	2.79656	1	1.48018	0.233155	1.42151	2.78983	NA
WBGene00023172		Y23H5A.8	Y23H5A.8a.2	8.82626	11.0628	3.56182	24.3351	20.7986	19.5759	1	1.48002	0.056538	3.63614	2.78953	NA
WBGene00019619	asp-14	K10C2.3	K10C2.3	2597.13	2160.57	3006.17	7496.19	8173.86	5936.17	4.44761e-13	1.47629	6.81544e-16	65.1859	2.78233	12.3519
WBGene00013644		Y105C5A.25	Pseudogene:Y105C5A.25	77.2298	63.0582	45.4132	178.133	212.938	123.981	0.00112223	1.47591	3.81046e-05	16.9635	2.7816	2.94992
WBGene00005664	sru-1	C33A12.14	C33A12.14	1.10328	1.10628	0.890455	2.92021	0.990411	4.66094	1	1.47535	0.424439	0.637992	2.78051	NA
WBGene00019923	fbxc-29	R07C3.7	R07C3.7	2.20657	18.8068	13.3568	41.8564	27.7315	26.1012	1	1.47396	0.0611619	3.50559	2.77782	NA
WBGene00013090		Y51B9A.8	Y51B9A.8	3.30985	1.10628	0.890455	8.76064	3.96165	1.86437	1	1.47291	0.341249	0.905732	2.77582	NA
WBGene00019070		F58H7.5	F58H7.5	9.92955	8.85027	15.1377	26.2819	17.8274	50.3381	1	1.47082	0.0367142	4.36362	2.77179	NA
WBGene00001782	gst-34	Y1H11.1	Y1H11.1	9.92955	4.42514	0.890455	13.6277	15.8466	12.1184	1	1.46821	0.159945	1.97474	2.76678	NA
WBGene00018124		F36H12.10	F36H12.10	81.6429	9.95656	14.2473	65.2181	214.919	12.1184	0.315608	1.46755	0.118039	2.44315	2.76551	0.500853
WBGene00016547		C40A11.4	C40A11.4	4.41313	5.53142	4.45227	16.5479	12.8753	10.2541	1	1.4644	0.106628	2.60351	2.7595	NA
WBGene00077703		K08E5.5	K08E5.5	2.20657	8.85027	1.78091	1.94681	24.7603	8.38968	1	1.46179	0.251584	1.31449	2.75451	NA
WBGene00012189		W02A2.4	Pseudogene:W02A2.4	23.1689	4.42514	11.5759	17.5213	58.4343	31.6944	1	1.45982	0.0638298	3.43497	2.75074	NA
WBGene00044062	snb-6	T14D7.3	T14D7.3	9.92955	6.63771	1.78091	9.73404	34.6644	5.59312	1	1.45829	0.177119	1.82164	2.74783	NA
WBGene00015679		C10F3.7	C10F3.7	17.6525	32.0822	10.6855	43.8032	77.2521	43.8128	1	1.45711	0.0135913	6.09047	2.74559	NA
WBGene00019233	ugt-14	H23N18.2	H23N18.2	6.6197	19.9131	12.4664	37.9628	30.7028	38.2197	1	1.45607	0.0215294	5.28342	2.7436	NA
WBGene00006047	ssp-19	C55C2.2	C55C2.2	46.3379	14.3817	8.01409	60.3511	104.984	22.3725	1	1.45545	0.0595807	3.54902	2.74243	NA
WBGene00019468		K07B1.8	K07B1.8	215.14	155.986	252.889	443.872	485.302	783.037	4.47741e-05	1.4547	6.35554e-07	24.8013	2.74099	4.34897
WBGene00018621		F48G7.10	F48G7.10	12.1361	4.42514	14.2473	34.0691	23.7699	27.0334	1	1.45172	0.0393231	4.24685	2.73534	NA
WBGene00016948	scrt-1	C55C2.1	C55C2.1	4.41313	1.10628	0.890455	2.92021	6.93288	7.4575	1	1.4517	0.309881	1.03118	2.73531	NA
WBGene00016697	cyp-33C2	C45H4.17	C45H4.17	13.2394	9.95656	15.1377	39.9096	31.6932	33.5587	1	1.45017	0.0123135	6.26515	2.73241	NA
WBGene00009805		F47B8.4	F47B8.4a	2.20657	6.63771	8.90455	14.6011	12.8753	21.4403	1	1.44965	0.106021	2.61255	2.73143	NA
WBGene00044066	fbxb-66	Y40B1B.3	Y40B1B.3	19.8591	56.4205	10.6855	75.9255	101.022	58.7278	1	1.44611	0.0203742	5.37954	2.72473	NA
WBGene00195170	linc-61	T10C6.18	WBGene00195170	4.41313	6.63771	8.01409	12.6543	32.6836	6.52531	1	1.43569	0.130013	2.29235	2.70512	NA
WBGene00011675	cyp-13A3	T10B9.5	T10B9.5	14.3427	8.85027	8.90455	23.3617	25.7507	37.2875	1	1.43422	0.0289838	4.76858	2.70236	NA
WBGene00219728	linc-16	T08E11.10	WBGene00219728	39.7182	38.7199	23.1518	81.766	113.897	77.3715	0.00906213	1.43314	0.000663541	11.5887	2.70034	2.04277
WBGene00044538		T09D3.8	T09D3.8	9.92955	5.53142	5.34273	6.81383	44.5685	4.66094	1	1.43182	0.182678	1.7757	2.69786	NA
WBGene00018247		F40G9.12	F40G9.12	4.41313	3.31885	4.45227	14.6011	10.8945	7.4575	1	1.43126	0.150302	2.06919	2.69683	NA
WBGene00019797	fbxb-31	M151.5	M151.5	1.10328	5.53142	4.45227	10.7074	10.8945	8.38968	1	1.4292	0.188392	1.73015	2.69297	NA
WBGene00017249	fbxb-108	F08D12.6	F08D12.6	4.41313	16.5943	2.67136	25.3085	25.7507	12.1184	1	1.429	0.12182	2.39377	2.69261	NA
WBGene00009811		F47B8.10	F47B8.10	2.20657	1.10628	2.67136	1.94681	3.96165	10.2541	1	1.42555	0.327605	0.958343	2.68617	NA
WBGene00009063		F22G12.3	F22G12.3	3.30985	6.63771	6.23318	15.5745	16.837	11.1862	1	1.42437	0.105834	2.61535	2.68397	NA
WBGene00015511		C06A6.7	C06A6.7	9.92955	8.85027	7.12364	7.78723	48.5302	13.0506	1	1.42314	0.116495	2.46382	2.68168	NA
WBGene00018109	fbxb-12	F36H5.11	F36H5.11	4.41313	11.0628	1.78091	16.5479	19.8082	9.32187	1	1.42056	0.151019	2.06193	2.6769	NA
WBGene00009972	oac-33	F53C11.2	Pseudogene:F53C11.2	7.72298	4.42514	6.23318	16.5479	16.837	15.8472	1	1.42055	0.0808378	3.04798	2.67687	NA
WBGene00017912	fbxb-107	F29A7.2	F29A7.2	6.6197	9.95656	4.45227	15.5745	18.8178	21.4403	1	1.42044	0.0733297	3.20687	2.67667	NA
WBGene00019798	fbxb-32	M151.6	M151.6	2.20657	4.42514	1.78091	7.78723	9.90411	4.66094	1	1.42044	0.240281	1.37894	2.67667	NA
WBGene00021204	fbxb-77	Y17G9B.7	Y17G9B.7a	4.41313	15.488	13.3568	32.1223	37.6356	19.5759	1	1.41994	0.0489439	3.87727	2.67575	NA
WBGene00013905	ugt-4	ZC455.5	ZC455.5a	57.3707	57.5268	46.3036	197.601	86.1658	146.353	0.00585998	1.41842	0.000360192	12.7282	2.67292	2.2321
WBGene00015193	clec-117	B0432.12	B0432.12	15.446	7.74399	2.67136	17.5213	40.6069	10.2541	1	1.41455	0.12722	2.3261	2.66576	NA
WBGene00013230	fbxb-22	Y56A3A.10	Y56A3A.10	8.82626	11.0628	10.6855	34.0691	30.7028	16.7794	1	1.41295	0.037306	4.33639	2.66281	NA
WBGene00018393	msra-1	F43E2.5	F43E2.5.2	3799.71	4713.88	4942.91	14247.7	12695.1	8885.61	6.7725e-10	1.4127	1.85712e-12	49.6294	2.66235	9.16925
WBGene00045401	eol-1	T26F2.3	T26F2.3.2	2.20657	9.95656	11.5759	15.5745	22.7795	25.1691	1	1.40923	0.0916324	2.84546	2.65595	NA
WBGene00045188		B0284.5	Pseudogene:B0284.5	1.10328	1.10628	1.78091	2.92021	4.95206	2.79656	1	1.40512	0.387168	0.747817	2.6484	NA
WBGene00018943	dgn-2	F56C3.6	F56C3.6	1.10328	1.10628	1.78091	6.81383	1.98082	1.86437	1	1.40492	0.404916	0.693679	2.64803	NA
WBGene00017208	fbxb-35	F07E5.2	F07E5.2	11.0328	23.232	17.8091	42.8298	63.3863	31.6944	1	1.40367	0.0151497	5.89897	2.64574	NA
WBGene00019313	btb-10	K02E7.9	K02E7.9	28.6854	45.3577	20.4805	75.9255	96.0699	76.4393	0.0175202	1.40167	0.00171967	9.82702	2.64207	1.75646
WBGene00021171		Y8A9A.2	Y8A9A.2	233.896	119.479	111.307	318.303	331.788	575.159	0.00251341	1.40099	0.000113923	14.8907	2.64083	2.59974
WBGene00009108		F25D1.3	F25D1.3	5.51641	2.21257	4.45227	6.81383	20.7986	4.66094	1	1.40084	0.212428	1.5548	2.64055	NA
WBGene00015366		C03A7.2	C03A7.2	11.0328	4.42514	5.34273	17.5213	12.8753	24.2369	1	1.40054	0.0928769	2.82379	2.64001	NA
WBGene00001889	his-15	ZK131.9	ZK131.9	19.8591	13.2754	15.1377	56.4574	29.7123	41.0162	1	1.39938	0.0130933	6.15645	2.63788	NA
WBGene00001918	his-44	F08G2.1	F08G2.1	19.8591	13.2754	15.1377	56.4574	29.7123	41.0162	1	1.39938	0.0130933	6.15645	2.63788	NA
WBGene00045416		Y37H2A.14	Y37H2A.14	101.502	143.817	104.183	417.59	255.526	245.165	0.00028013	1.39489	6.37121e-06	20.3733	2.62968	3.55264
WBGene00021183		Y9C9A.16	Y9C9A.16a	7.72298	9.95656	12.4664	17.5213	24.7603	37.2875	1	1.39471	0.0450196	4.01791	2.62936	NA
WBGene00018296		F41F3.1	F41F3.1	5.51641	1.10628	2.67136	2.92021	15.8466	5.59312	1	1.3919	0.283041	1.15243	2.62423	NA
WBGene00015892		C17C3.9	C17C3.9	6.6197	3.31885	1.78091	6.81383	22.7795	0.932187	1	1.38957	0.299149	1.07798	2.62001	NA
WBGene00008566	acox-3	F08A8.3	F08A8.3	558.261	434.77	311.659	1351.09	1123.13	940.577	2.24718e-06	1.38956	1.93926e-08	31.5544	2.62	5.64836
WBGene00001777	gst-29	Y53F4B.32	Y53F4B.32	17.6525	34.2948	17.8091	53.5372	77.2521	51.2703	1	1.389	0.00621151	7.4879	2.61897	NA
WBGene00010352	fbxb-76	H02I12.2	H02I12.2	1.10328	2.21257	3.56182	8.76064	1.98082	7.4575	1	1.38869	0.313534	1.01573	2.61841	NA
WBGene00007454		C08F11.7	C08F11.7	18.7558	13.2754	13.3568	31.1489	41.5973	45.6772	1	1.38725	0.0122753	6.27066	2.61579	NA
WBGene00019281		K01A2.6	K01A2.6	1.10328	2.21257	1.78091	4.86702	0.990411	7.4575	1	1.38684	0.378301	0.776215	2.61505	NA
WBGene00007249		C01G12.9	C01G12.9	19.8591	3.31885	1.78091	18.4947	42.5877	3.72875	1	1.38542	0.231129	1.4339	2.61249	NA
WBGene00009156	clec-196	F26D10.12	F26D10.12a	111.432	276.571	47.1941	401.043	467.474	264.741	0.0443564	1.3833	0.00651448	7.40218	2.60864	1.35304
WBGene00018104	fbxb-53	F36H5.5	F36H5.5b	4.41313	9.95656	3.56182	16.5479	15.8466	13.9828	1	1.38278	0.114984	2.48434	2.6077	NA
WBGene00007151	B0365.2	B0365.2	Pseudogene:B0365.2	1.10328	3.31885	0.890455	3.89362	8.9137	0.932187	1	1.38255	0.395267	0.722678	2.60728	NA
WBGene00013573		Y75B12B.11	Y75B12B.11	5.51641	1.10628	0.890455	2.92021	9.90411	6.52531	1	1.38198	0.325139	0.968162	2.60625	NA
WBGene00013830		ZC15.1	ZC15.1	6.6197	2.21257	11.5759	16.5479	14.8562	22.3725	1	1.38068	0.116114	2.46896	2.60391	NA
WBGene00020973		W03B1.3	W03B1.3.2	16.5492	4.42514	9.795	21.4149	29.7123	28.8978	1	1.37997	0.0579443	3.59527	2.60263	NA
WBGene00018168	irld-7	F38A5.11	F38A5.11	7.72298	4.42514	2.67136	12.6543	24.7603	0.932187	1	1.37813	0.262478	1.25564	2.59932	NA
WBGene00010379		H12D21.3	H12D21.3	13.2394	18.8068	8.01409	40.883	29.7123	32.6266	1	1.37634	0.0259849	4.95702	2.59609	NA
WBGene00013889		ZC412.8	ZC412.8	13.2394	18.8068	8.01409	40.883	29.7123	32.6266	1	1.37634	0.0259849	4.95702	2.59609	NA
WBGene00016153		C27A2.5	C27A2.5	8.82626	1.10628	4.45227	8.76064	25.7507	2.79656	1	1.37412	0.257899	1.28	2.59211	NA
WBGene00022128		Y71F9B.6	Y71F9B.6f	241.619	315.291	118.43	601.564	750.732	395.247	0.00310557	1.37383	0.000153504	14.3287	2.59157	2.50786
WBGene00017869		F28A10.1	F28A10.1	13.2394	2.21257	3.56182	5.84043	36.6452	6.52531	1	1.37178	0.230235	1.43941	2.58789	NA
WBGene00005070	srb-5	C27D6.6	C27D6.6	1.10328	2.21257	2.67136	5.84043	7.92329	1.86437	1	1.37107	0.34074	0.907646	2.58663	NA
WBGene00002204	kin-21	W08D2.8	W08D2.8	18.7558	6.63771	1.78091	16.5479	49.5206	3.72875	1	1.36972	0.220208	1.50301	2.5842	NA
WBGene00219294		F43G6.16	F43G6.16	5.51641	6.63771	4.45227	9.73404	22.7795	10.2541	1	1.36916	0.134434	2.24054	2.5832	NA
WBGene00010754		K10G4.5	K10G4.5	1.10328	1.10628	3.56182	1.94681	1.98082	11.1862	1	1.36901	0.38284	0.761562	2.58293	NA
WBGene00022632		ZC581.2	ZC581.2	28.6854	6.63771	6.23318	28.2287	69.3288	9.32187	1	1.36837	0.13614	2.22105	2.58179	NA
WBGene00008719	ttr-52	F11F1.7	F11F1.7	5.51641	19.9131	8.90455	30.1755	38.626	19.5759	1	1.36832	0.0624506	3.47108	2.58169	NA
WBGene00010659		K08D8.5	K08D8.5	328.778	378.349	284.945	982.165	853.735	722.445	3.4385e-09	1.36805	1.16475e-11	46.0297	2.58121	8.46363
WBGene00009964	fip-6	F53B6.9	F53B6.9	35.3051	43.1451	11.5759	67.1649	122.811	41.0162	1	1.36644	0.0270386	4.88835	2.57834	NA
WBGene00017320		F09G8.5	F09G8.5	41.9247	42.0388	46.3036	153.798	89.137	93.2187	0.00611988	1.36607	0.000385979	12.5989	2.57768	2.21326
WBGene00012910		Y46G5A.20	Y46G5A.20	36.4083	54.2079	28.4945	123.622	101.022	81.1003	0.0110024	1.3656	0.000890027	11.0434	2.57684	1.95851
WBGene00013403	fbxb-100	Y63D3A.2	Y63D3A.2	8.82626	3.31885	6.23318	12.6543	19.8082	14.915	1	1.36508	0.112691	2.51608	2.57591	NA
WBGene00018172		F38B6.2	F38B6.2	15.446	1.10628	9.795	6.81383	40.6069	20.5081	1	1.36392	0.18327	1.77091	2.57384	NA
WBGene00006097	str-31	C54F6.10	C54F6.10	2.20657	1.10628	0.890455	1.94681	6.93288	1.86437	1	1.36331	0.420242	0.649638	2.57274	NA
WBGene00001778	gst-30	ZK546.11	ZK546.11	40.8215	57.5268	27.6041	98.3138	87.1562	136.099	0.0135305	1.35937	0.00118728	10.51	2.56573	1.86869
WBGene00007611		C15H7.4	C15H7.4	3.30985	6.63771	5.34273	8.76064	27.7315	2.79656	1	1.35825	0.225342	1.47002	2.56375	NA
WBGene00021130		W10D9.2	W10D9.2	6.6197	7.74399	4.45227	9.73404	14.8562	23.3047	1	1.35759	0.116894	2.45846	2.56257	NA
WBGene00016921		C54F6.3	C54F6.3	18.7558	5.53142	5.34273	13.6277	55.463	6.52531	1	1.3567	0.17358	1.85175	2.56099	NA
WBGene00021530		Y41G9A.6	Y41G9A.6	3.30985	4.42514	3.56182	3.89362	12.8753	12.1184	1	1.35653	0.214164	1.54305	2.56068	NA
WBGene00018223	bath-13	F40B1.1	F40B1.1	20.9624	24.3383	24.0423	43.8032	72.3	61.5244	1	1.35586	0.00368085	8.43491	2.5595	NA
WBGene00021668		Y48G1BM.2	Pseudogene:Y48G1BM.2	3.30985	1.10628	0.890455	2.92021	3.96165	6.52531	1	1.35484	0.37264	0.794844	2.55768	NA
WBGene00018852		F55A3.7	F55A3.7	166.596	165.943	197.681	475.021	412.011	470.755	3.91612e-09	1.35441	1.3897e-11	45.6838	2.55693	8.40714
WBGene00016287		C31H1.2	C31H1.2	3.30985	6.63771	2.67136	0.973404	21.789	9.32187	1	1.35294	0.286709	1.13501	2.55432	NA
WBGene00249826		F42A9.18	F42A9.18b	13.2394	8.85027	0.890455	22.3883	17.8274	17.7116	1	1.35168	0.156413	2.00857	2.55208	NA
WBGene00017499	pud-1.1	F15E11.13	F15E11.13	16874.7	17618.7	10432.6	30953.3	39077.7	44610.7	2.29505e-07	1.35157	1.2957e-09	36.8198	2.5519	6.63921
WBGene00007989	fipr-22	C37A5.2	C37A5.2	7.72298	18.8068	24.9327	40.883	27.7315	63.3887	1	1.35126	0.0356132	4.41553	2.55135	NA
WBGene00020983		W03D2.9	W03D2.9	3.30985	2.21257	8.01409	8.76064	18.8178	7.4575	1	1.35001	0.199806	1.64379	2.54915	NA
WBGene00020587	ugt-9	T19H12.1	T19H12.1a	146.737	215.725	157.61	490.596	478.369	354.231	7.39577e-06	1.34821	7.69461e-08	28.8815	2.54597	5.13102
WBGene00021865	fbxa-66	Y54F10BM.11	Y54F10BM.11	1.10328	2.21257	8.90455	11.6809	7.92329	12.1184	1	1.34734	0.236388	1.40201	2.54443	NA
WBGene00009691		F44E5.4	F44E5.4	77.2298	64.1645	51.6464	179.106	198.082	112.795	0.00279669	1.34669	0.000132402	14.6073	2.54328	2.55336
WBGene00219553		T08G5.19	T08G5.19	12.1361	8.85027	13.3568	41.8564	33.674	12.1184	1	1.34663	0.0641055	3.42785	2.54317	NA
WBGene00015695	ugt-26	C10H11.6	C10H11.6a	827.462	1096.33	1056.08	2910.48	2656.28	1979.03	3.01483e-09	1.34012	9.96918e-12	46.3345	2.53173	8.52074
WBGene00045190		R01H2.8	R01H2.8	5.51641	6.63771	3.56182	8.76064	13.8658	16.7794	1	1.33672	0.14578	2.11586	2.52577	NA
WBGene00016845		C50F7.5	C50F7.5	129.084	63.0582	86.3741	210.255	246.612	246.097	0.000887428	1.3367	2.74791e-05	17.5847	2.52572	3.05187
WBGene00023039		F41B5.11	Pseudogene:F41B5.11	9.92955	9.95656	4.45227	29.2021	16.837	14.915	1	1.33618	0.0919425	2.84003	2.52482	NA
WBGene00001063	dpy-1	M01E10.2	M01E10.2a	246.032	73.0148	169.186	268.66	475.397	488.466	0.0132137	1.33578	0.00115416	10.5623	2.52411	1.87898
WBGene00015479	wht-1	C05D10.3	C05D10.3	52.9576	63.0582	70.3459	145.037	176.293	150.082	0.000318133	1.33545	7.51526e-06	20.0574	2.52354	3.49739
WBGene00007693		C23H4.4	C23H4.4a	59.5773	82.9713	56.9891	200.521	174.312	127.71	0.001519	1.33495	5.77307e-05	16.1757	2.52266	2.81844
WBGene00016546		C40A11.3	C40A11.3	11.0328	25.4445	6.23318	29.2021	54.4726	23.3047	1	1.33431	0.0685215	3.31809	2.52155	NA
WBGene00194713		F19B10.13	F19B10.13	6.6197	19.9131	17.8091	35.0426	41.5973	35.4231	1	1.33256	0.0308467	4.66148	2.51849	NA
WBGene00008381		D1081.3	D1081.3	3.30985	6.63771	1.78091	4.86702	18.8178	5.59312	1	1.33204	0.257767	1.28071	2.51758	NA
WBGene00016598		C42D4.13	C42D4.13a	28.6854	24.3383	16.9186	24.3351	116.869	34.4909	1	1.33153	0.0510015	3.80822	2.5167	NA
WBGene00007452		C08F11.3	C08F11.3	15.446	22.1257	25.8232	41.8564	62.3959	55.9312	1	1.3315	0.00706886	7.25539	2.51665	NA
WBGene00196315		Y24D9A.11	Y24D9A.11	424.764	273.252	375.772	847.835	676.451	1177.35	2.51646e-05	1.331	3.22702e-07	26.1088	2.51578	4.59921
WBGene00008590		F08H9.2	F08H9.2	137.91	30.976	32.9468	147.957	316.932	41.9484	0.20648	1.33013	0.061799	3.48843	2.51425	0.685123
WBGene00007833	oac-6	C31A11.5	C31A11.5	157.769	181.431	126.445	462.367	366.452	339.316	6.53912e-06	1.32958	6.6662e-08	29.1594	2.51329	5.18448
WBGene00018103		F36H5.4	F36H5.4	5.51641	3.31885	0.890455	17.5213	1.98082	4.66094	1	1.32939	0.330601	0.946542	2.51297	NA
WBGene00018623		F48G7.12	F48G7.12	6.6197	2.21257	7.12364	9.73404	11.8849	18.6437	1	1.32687	0.161807	1.95726	2.50857	NA
WBGene00017336	ugt-41	F10D2.11	F10D2.11	830.772	1091.9	913.606	2454.93	2723.63	1934.29	4.16933e-10	1.3265	1.10967e-12	50.6399	2.50793	9.37993
WBGene00009791		F46F3.3	F46F3.3a	18.7558	14.3817	14.2473	25.3085	82.2041	11.1862	1	1.3248	0.0938478	2.8071	2.50498	NA
WBGene00000715	col-142	T15B7.4	T15B7.4	7762.7	2484.71	2397.1	12015.7	13338.9	6313.7	0.186658	1.32456	0.0536244	3.72435	2.50456	0.728954
WBGene00006170	str-119	C13B7.5	C13B7.5	1.10328	1.10628	0.890455	0.973404	3.96165	2.79656	1	1.32301	0.481287	0.495947	2.50188	NA
WBGene00019700	btb-11	M01D1.3	M01D1.3	19.8591	50.8891	16.9186	82.7394	83.1945	52.2025	1	1.32156	0.0160844	5.79362	2.49935	NA
WBGene00009609	oac-27	F41D3.4	F41D3.4	6.6197	1.10628	1.78091	3.89362	18.8178	0.932187	1	1.32047	0.372629	0.794877	2.49747	NA
WBGene00008069		C43D7.7	C43D7.7	3.30985	6.63771	4.45227	8.76064	17.8274	9.32187	1	1.31946	0.173959	1.84849	2.49572	NA
WBGene00017484		F15E6.3	F15E6.3	190.868	252.233	235.97	397.149	523.928	772.783	0.000130703	1.31861	2.4667e-06	22.1922	2.49426	3.88371
WBGene00020343	acs-3	T08B1.6	T08B1.6	179.835	142.711	118.43	374.761	405.078	317.876	9.60461e-06	1.31851	1.02251e-07	28.3309	2.49409	5.01752
WBGene00023423		F43C1.7	F43C1.7	6.6197	9.95656	4.45227	20.4415	13.8658	17.7116	1	1.31785	0.103776	2.64653	2.49294	NA
WBGene00020890	fbxa-202	T28C12.3	T28C12.3	23.1689	3.31885	6.23318	9.73404	60.4151	11.1862	1	1.31776	0.19718	1.66314	2.49279	NA
WBGene00018448		F45D11.1	F45D11.1.3	29.7886	24.3383	44.5227	44.7766	107.955	94.1509	0.0519887	1.31742	0.00816792	6.99628	2.49219	1.28409
WBGene00019417	fbxb-52	K05F6.6	K05F6.6	4.41313	4.42514	1.78091	12.6543	7.92329	5.59312	1	1.31554	0.241466	1.37201	2.48896	NA
WBGene00010457		K01C8.2	K01C8.2	6.6197	6.63771	16.0282	25.3085	30.7028	17.7116	1	1.31501	0.0753375	3.16272	2.48804	NA
WBGene00013586		Y80D3A.8	Y80D3A.8	15.446	2.21257	1.78091	7.78723	33.674	6.52531	1	1.31353	0.264705	1.24398	2.48549	NA
WBGene00022321	fbxa-25	Y82E9BL.4	Y82E9BL.4	1.10328	2.21257	1.78091	3.89362	6.93288	1.86437	1	1.31209	0.392253	0.731946	2.48301	NA
WBGene00000430	ceh-5	C16C2.1	C16C2.1	15.446	7.74399	15.1377	34.0691	29.7123	31.6944	1	1.31153	0.0321753	4.58913	2.48204	NA
WBGene00220190		Y65B4BM.2	Y65B4BM.2	7.72298	2.21257	5.34273	13.6277	17.8274	6.52531	1	1.31068	0.188894	1.72623	2.48059	NA
WBGene00019133		F59H6.2	F59H6.2	24.2722	15.488	27.6041	55.484	45.5589	66.1853	1	1.3065	0.00739906	7.17344	2.47341	NA
WBGene00044631	bus-18	F55A11.5	F55A11.5	15.446	14.3817	28.4945	48.6702	59.4247	37.2875	1	1.30611	0.016361	5.76365	2.47275	NA
WBGene00018229		F40C5.2	F40C5.2	48.5444	56.4205	51.6464	109.995	101.022	175.251	0.00572302	1.30344	0.000348025	12.7924	2.46816	2.24237
WBGene00020754		T24A6.17	T24A6.17	48.5444	56.4205	51.6464	109.995	101.022	175.251	0.00572302	1.30344	0.000348025	12.7924	2.46816	2.24237
WBGene00009759	ttr-12	F46B3.4	F46B3.4b	22.0657	12.1691	1.78091	13.6277	66.3576	8.38968	1	1.30324	0.211801	1.55907	2.46782	NA
WBGene00004992	spp-7	ZK616.9	ZK616.9b	4.41313	5.53142	6.23318	4.86702	26.7411	8.38968	1	1.30057	0.207745	1.58707	2.46326	NA
WBGene00012335		W07G4.1	W07G4.1	5.51641	6.63771	1.78091	9.73404	14.8562	9.32187	1	1.30006	0.200328	1.63998	2.46239	NA
WBGene00015615	fbxc-48	C08G5.2	C08G5.2	7.72298	2.21257	0.890455	0.973404	20.7986	4.66094	1	1.29996	0.371982	0.797032	2.46222	NA
WBGene00008066	fbxb-65	C43D7.2	C43D7.2	4.41313	3.31885	4.45227	14.6011	8.9137	6.52531	1	1.29795	0.207006	1.59224	2.45879	NA
WBGene00004998	spp-13	F08F1.6	F08F1.6	68.4035	58.6331	37.3991	71.0585	267.411	65.2531	0.110792	1.29776	0.0243101	5.07237	2.45846	0.955492
WBGene00009686	ent-7	F44D12.9	F44D12.9c	111.432	154.88	104.183	208.309	383.289	316.944	0.000996078	1.29593	3.17325e-05	17.3111	2.45535	3.00171
WBGene00018178		F38E1.3	F38E1.3	18.7558	5.53142	5.34273	18.4947	45.5589	8.38968	1	1.29588	0.160554	1.969	2.45527	NA
WBGene00019112		F59E11.6	F59E11.6	7.72298	2.21257	4.45227	4.86702	25.7507	4.66094	1	1.29323	0.264627	1.24439	2.45076	NA
WBGene00010104	fbxb-60	F55C9.7	F55C9.7	6.6197	4.42514	4.45227	10.7074	17.8274	9.32187	1	1.29142	0.163299	1.94341	2.44769	NA
WBGene00016875		C52D10.1	C52D10.1	476.618	283.209	299.193	851.729	864.629	871.595	2.64157e-06	1.29023	2.3009e-08	31.2224	2.44567	5.57814
WBGene00009546	fbxb-3	F38H4.2	F38H4.2	5.51641	23.232	13.3568	46.7234	34.6644	21.4403	1	1.28862	0.0700914	3.28088	2.44294	NA
WBGene00050934		T19C9.10	T19C9.10a	5.51641	4.42514	0.890455	9.73404	7.92329	8.38968	1	1.28747	0.264349	1.24584	2.44099	NA
WBGene00021673		Y48G1BM.8	Pseudogene:Y48G1BM.8	82.7462	74.121	66.7841	188.84	169.36	186.437	0.000102532	1.28678	1.79445e-06	22.8034	2.43983	3.98914
WBGene00019640	dos-2	K10G6.2	K10G6.2	9.92955	3.31885	4.45227	8.76064	28.7219	5.59312	1	1.28623	0.218174	1.51634	2.4389	NA
WBGene00011364		T02B5.3	T02B5.3	230.586	234.532	174.529	515.904	589.295	452.111	6.27296e-07	1.28601	4.14858e-09	34.5527	2.43853	6.20253
WBGene00016336		C33C12.4	C33C12.4	23.1689	12.1691	7.12364	17.5213	56.4534	28.8978	1	1.28487	0.0830208	3.00475	2.4366	NA
WBGene00021500		Y40C7B.4	Y40C7B.4	11.0328	13.2754	8.01409	32.1223	24.7603	21.4403	1	1.28392	0.0519185	3.77839	2.43499	NA
WBGene00017444		F13H8.12	F13H8.12a	13.2394	3.31885	4.45227	6.81383	37.6356	6.52531	1	1.28314	0.233426	1.41986	2.43368	NA
WBGene00206372		B0454.26	B0454.26	5.51641	3.31885	0.890455	6.81383	11.8849	4.66094	1	1.28263	0.300501	1.07197	2.43282	NA
WBGene00007230		C01G10.1	C01G10.1	35.3051	12.1691	8.01409	26.2819	96.0699	12.1184	1	1.28171	0.142286	2.15306	2.43127	NA
WBGene00010717		K09C8.7	K09C8.7	1.10328	4.42514	4.45227	0.973404	17.8274	5.59312	1	1.28069	0.35596	0.852097	2.42955	NA
WBGene00044197	fbxb-63	F55C9.13	F55C9.13	5.51641	19.9131	9.795	31.1489	34.6644	19.5759	1	1.28056	0.0771559	3.12382	2.42934	NA
WBGene00021042	btb-5	W05G11.5	W05G11.5	1.10328	1.10628	4.45227	3.89362	7.92329	4.66094	1	1.27585	0.362607	0.828844	2.42141	NA
WBGene00004444	rpl-30	Y106G6H.3	Y106G6H.3b	3854.87	2593.13	5527.05	10551.7	7371.63	11051.1	8.32096e-05	1.27455	1.40958e-06	23.2675	2.41924	4.07983
WBGene00004997	spp-12	T22G5.7	T22G5.7	1.10328	3.31885	0.890455	3.89362	7.92329	0.932187	1	1.27443	0.436195	0.606272	2.41904	NA
WBGene00014703	C47A4.4	C47A4.4	Pseudogene:C47A4.4	3.30985	1.10628	0.890455	1.94681	8.9137	1.86437	1	1.27328	0.433976	0.61216	2.41711	NA
WBGene00021703	cpt-3	Y48G9A.10	Y48G9A.10	68.4035	57.5268	57.8796	118.755	133.706	191.098	0.00282584	1.27262	0.000134694	14.5749	2.416	2.54885
WBGene00077692		C08E8.10	C08E8.10	82.7462	67.4833	54.3177	177.16	163.418	151.947	0.000807572	1.27212	2.44897e-05	17.8038	2.41516	3.09282
WBGene00017395		F12A10.6	F12A10.6	4.41313	5.53142	8.01409	14.6011	18.8178	10.2541	1	1.27098	0.14331	2.14205	2.41326	NA
WBGene00008390		D1086.3	D1086.3	1765.25	1944.85	879.769	3572.39	3846.76	3625.28	7.35867e-05	1.26739	1.18104e-06	23.6079	2.40726	4.1332
WBGene00008015	fbxa-174	C38D9.7	C38D9.7	2.20657	2.21257	0.890455	7.78723	2.97123	1.86437	1	1.26375	0.417644	0.656936	2.40119	NA
WBGene00017251	fbxb-105	F08D12.8	F08D12.8	2.20657	11.0628	8.01409	18.4947	16.837	15.8472	1	1.26257	0.145163	2.12236	2.39923	NA
WBGene00020619		T20D4.13	T20D4.13	7.72298	7.74399	5.34273	21.4149	22.7795	5.59312	1	1.26227	0.16317	1.9446	2.39873	NA
WBGene00019473	cyp-35A5	K07C6.5	K07C6.5	33.0985	49.7828	53.4273	103.181	125.782	98.8118	0.00754934	1.26155	0.000517093	12.053	2.39753	2.12209
WBGene00194839		C01B10.44	C01B10.44	8.82626	2.21257	1.78091	2.92021	25.7507	1.86437	1	1.25985	0.361357	0.833171	2.39471	NA
WBGene00018268		F41C3.2	F41C3.2	258.168	251.127	333.921	603.511	691.307	727.106	4.78729e-08	1.25943	2.16218e-10	40.3143	2.394	7.31991
WBGene00012307		W06F12.3	W06F12.3	20.9624	5.53142	6.23318	22.3883	41.5973	13.9828	1	1.25901	0.131041	2.28012	2.39332	NA
WBGene00016545		C40A11.2	C40A11.2.2	7.72298	16.5943	12.4664	35.0426	29.7123	23.3047	1	1.25857	0.0503556	3.82958	2.39258	NA
WBGene00016285		C31B8.12	C31B8.12	4.41313	5.53142	4.45227	1.94681	29.7123	2.79656	1	1.25807	0.324717	0.969851	2.39175	NA
WBGene00018911		F56A4.3	F56A4.3	15.446	8.85027	8.01409	20.4415	22.7795	33.5587	1	1.25637	0.0681177	3.3278	2.38893	NA
WBGene00009418		F35E8.2	F35E8.2.2	9.92955	1.10628	0.890455	4.86702	15.8466	7.4575	1	1.25489	0.338447	0.916306	2.38649	NA
WBGene00022431	set-33	Y108F1.3	Y108F1.3	16.5492	7.74399	16.9186	32.1223	16.837	49.4059	1	1.25153	0.0712575	3.25381	2.38094	NA
WBGene00009104		F25C8.1	Pseudogene:F25C8.1	31.9952	29.8697	13.3568	58.4043	65.3671	54.0669	1	1.25133	0.0129587	6.17474	2.38061	NA
WBGene00019482		K07C11.10	K07C11.10	2.20657	5.53142	7.12364	12.6543	10.8945	12.1184	1	1.25056	0.192153	1.70103	2.37934	NA
WBGene00001781	gst-33	C02A12.1	C02A12.1	35.3051	29.8697	48.975	62.2979	84.185	125.845	0.0358237	1.24978	0.00479903	7.95366	2.37806	1.44583
WBGene00012250		W04E12.5	W04E12.5a	14.3427	4.42514	2.67136	9.73404	28.7219	12.1184	1	1.24966	0.204168	1.6123	2.37785	NA
WBGene00012679		Y39B6A.18	Y39B6A.18	17.6525	2.21257	5.34273	8.76064	42.5877	8.38968	1	1.24865	0.240885	1.37541	2.37618	NA
WBGene00018630		F49D11.6	F49D11.6	37.5116	14.3817	15.1377	19.4681	99.0411	40.084	1	1.24565	0.0847727	2.97094	2.37126	NA
WBGene00017488	dct-7	F15E6.8	F15E6.8	1.10328	3.31885	7.12364	7.78723	6.93288	13.0506	1	1.24526	0.275644	1.18844	2.3706	NA
WBGene00001841	hen-1	C36B7.7	C36B7.7	34.2018	47.5702	36.5086	83.7128	103.993	92.2865	0.00934513	1.24499	0.000700941	11.4867	2.37017	2.02941
WBGene00015369	ugt-51	C03A7.11	C03A7.11	108.122	165.943	121.992	307.596	366.452	263.809	0.000174115	1.24454	3.5247e-06	21.5074	2.36942	3.75916
WBGene00008731		F13B12.3	F13B12.3b	40.8215	6.63771	34.7277	31.1489	76.2617	87.6256	1	1.24399	0.0698243	3.28715	2.36852	NA
WBGene00005905	srx-14	C44B12.8	C44B12.8	1.10328	4.42514	5.34273	10.7074	5.94247	9.32187	1	1.24379	0.274643	1.19341	2.36819	NA
WBGene00000784	cpr-4	F44C4.3	F44C4.3	20074.2	17243.7	18896.3	49764.3	40405.8	42736.1	6.19848e-17	1.2414	5.4991e-20	83.7911	2.36428	16.2077
WBGene00011104	cut-5	R07E3.3	R07E3.3a	8.82626	7.74399	5.34273	14.6011	26.7411	10.2541	1	1.24101	0.139023	2.18874	2.36364	NA
WBGene00044419	fbxc-17	C32B5.17	C32B5.17a	1.10328	2.21257	3.56182	8.76064	3.96165	3.72875	1	1.24072	0.363849	0.824564	2.36317	NA
WBGene00004907	snf-8	ZK829.10	Pseudogene:ZK829.10	7.72298	3.31885	2.67136	6.81383	19.8082	5.59312	1	1.24047	0.25939	1.27201	2.36275	NA
WBGene00044360		C33C12.11	C33C12.11	5.51641	5.53142	1.78091	5.84043	13.8658	10.2541	1	1.23971	0.247213	1.33898	2.36152	NA
WBGene00016359	fbxb-88	C33F10.13	C33F10.13	26.4788	78.5462	24.0423	116.809	101.022	85.7612	0.0855011	1.23943	0.0165426	5.74426	2.36105	1.06803
WBGene00010101	fbxb-57	F55C9.4	F55C9.4	13.2394	15.488	8.90455	28.2287	39.6165	20.5081	1	1.2378	0.0566105	3.634	2.35838	NA
WBGene00013153		Y53F4B.6	Pseudogene:Y53F4B.6	4.41313	4.42514	8.90455	8.76064	13.8658	19.5759	1	1.23734	0.172633	1.85993	2.35763	NA
WBGene00045085		Y24D9A.10	Y24D9A.10	72.8167	48.6765	58.77	164.505	102.012	157.54	0.00676613	1.23491	0.000444199	12.3364	2.35366	2.16966
WBGene00002012	hsp-12.3	F38E11.1	F38E11.1	31.9952	45.3577	32.0564	89.5532	106.964	60.5922	0.0281883	1.23451	0.00338969	8.58486	2.35302	1.54993
WBGene00013233	sdz-33	Y56A3A.14	Y56A3A.14	17.6525	24.3383	12.4664	55.484	34.6644	37.2875	1	1.23416	0.0272609	4.87421	2.35244	NA
WBGene00014697	cyp-25A3	C36A4.3	C36A4.3	188.661	250.02	194.119	474.048	515.014	496.856	1.76196e-07	1.23285	9.37891e-10	37.45	2.35031	6.75401
WBGene00007239		C01G10.14	C01G10.14	23.1689	1.10628	2.67136	9.73404	51.5014	1.86437	1	1.23261	0.353107	0.862261	2.34993	NA
WBGene00008867		F15G9.3	F15G9.3	1.10328	1.10628	2.67136	3.89362	4.95206	2.79656	1	1.23151	0.425587	0.634835	2.34812	NA
WBGene00000700	col-126	F54D1.2	F54D1.2	371.806	96.2467	81.9218	146.011	1060.73	83.8968	0.567585	1.23088	0.311419	1.02465	2.3471	0.245969
WBGene00000701	col-127	F54D1.3	F54D1.3	371.806	96.2467	81.9218	146.011	1902-11-25 17:31:54	83.8968	0.567585	1.23088	0.311419	1.02465	2.3471	05:54:11.721000
WBGene00004149	trpl-5	T16A1.7	T16A1.7	4.41313	1.10628	2.67136	2.92021	6.93288	9.32187	1	1.22874	0.346479	0.886312	2.34362	NA
WBGene00022652		ZK84.5	ZK84.5	31.9952	3.31885	4.45227	37.9628	43.5781	11.1862	1	1.22812	0.205311	1.60419	2.34262	NA
WBGene00016953		C55C3.3	C55C3.3	315.539	131.648	114.869	287.154	525.908	501.517	0.0206896	1.22768	0.00219428	9.37948	2.3419	1.68425
WBGene00021180		Y9C9A.13	Y9C9A.13	1.10328	5.53142	5.34273	15.5745	8.9137	3.72875	1	1.22677	0.29644	1.09014	2.34042	NA
WBGene00007218		C01A2.6	C01A2.6	3.30985	3.31885	0.890455	3.89362	6.93288	6.52531	1	1.22664	0.355261	0.854575	2.34021	NA
WBGene00235367		F49F1.17	F49F1.17	3.30985	2.21257	2.67136	5.84043	3.96165	9.32187	1	1.22534	0.32251	0.978739	2.33811	NA
WBGene00005670	sru-7	C28C12.13	C28C12.13	1.10328	1.10628	2.67136	3.89362	3.96165	3.72875	1	1.2252	0.425051	0.636308	2.33788	NA
WBGene00001387	far-3	F15B9.1	F15B9.1	287.957	377.243	315.221	767.043	753.703	768.122	9.71178e-10	1.2237	2.8981e-12	48.7564	2.33545	9.0127
WBGene00014247		ZK1307.4	ZK1307.4	89.3659	27.6571	16.0282	86.633	199.073	24.2369	0.303607	1.22298	0.111193	2.53719	2.33428	0.517689
WBGene00235351		C32B5.18	C32B5.18	7.72298	23.232	0.890455	31.1489	25.7507	16.7794	1	1.22278	0.212406	1.55495	2.33397	NA
WBGene00018122	ttbk-2	F36H12.8	F36H12.8	73.92	21.0194	12.4664	69.1117	160.447	20.5081	0.327886	1.22273	0.124815	2.35583	2.33387	0.484277
WBGene00014944		Y68A4A.12	Pseudogene:Y68A4A.12	2.20657	4.42514	1.78091	6.81383	9.90411	2.79656	1	1.22258	0.34115	0.906106	2.33363	NA
WBGene00022725		ZK381.2	ZK381.2	8.82626	3.31885	6.23318	6.81383	26.7411	9.32187	1	1.22012	0.216029	1.53055	2.32966	NA
WBGene00001476	fmo-1	K08C7.2	K08C7.2.3	156.666	167.049	196.79	386.441	501.148	324.401	5.57578e-05	1.21726	8.36434e-07	24.2721	2.32504	4.25369
WBGene00015991		C18H2.4	Pseudogene:C18H2.4	13.2394	2.21257	7.12364	6.81383	31.6932	13.9828	1	1.21717	0.219814	1.50559	2.3249	NA
WBGene00005558	sri-46	K07E8.11	K07E8.11	2.20657	1.10628	0.890455	1.94681	4.95206	2.79656	1	1.2168	0.46892	0.52452	2.3243	NA
WBGene00021720		Y49F6B.8	Y49F6B.8	48.5444	17.7005	4.45227	40.883	103.993	18.6437	1	1.21561	0.159555	1.97843	2.32239	NA
WBGene00044922		Y43C5A.7	Y43C5A.7	131.291	112.841	75.6886	244.324	248.593	247.03	0.000541577	1.215	1.50256e-05	18.7343	2.32141	3.26634
WBGene00012101	zip-10	T27F2.4	T27F2.4	157.769	205.769	162.063	459.447	358.529	400.84	5.68763e-06	1.21472	5.55047e-08	29.5143	2.32096	5.24507
WBGene00016877		C52D10.3	C52D10.3	217.347	149.348	157.61	360.16	421.915	432.535	1.84343e-05	1.21349	2.21527e-07	26.8355	2.31897	4.73437
WBGene00007289		C04B4.1	C04B4.1.2	2.20657	2.21257	3.56182	5.84043	11.8849	0.932187	1	1.21342	0.38809	0.744919	2.31886	NA
WBGene00012947		Y47H9C.1	Y47H9C.1	47.4412	38.7199	80.1409	77.8723	169.36	139.828	0.0411998	1.21287	0.00590799	7.57815	2.31798	1.38511
WBGene00011619		T08G3.7	T08G3.7	24.2722	6.63771	9.795	24.3351	62.3959	7.4575	1	1.2125	0.176443	1.82733	2.31739	NA
WBGene00010271		F58G1.9	Pseudogene:F58G1.9	8.82626	12.1691	3.56182	19.4681	23.7699	13.0506	1	1.2099	0.142088	2.1552	2.31322	NA
WBGene00003778	nnt-1	C15H9.1	C15H9.1	112.535	128.329	140.692	197.601	305.047	380.332	0.00157674	1.2095	6.19368e-05	16.0425	2.31258	2.80224
WBGene00011178		R09E10.9	Pseudogene:R09E10.9	12.1361	1.10628	0.890455	8.76064	21.789	1.86437	1	1.2082	0.386588	0.749648	2.31049	NA
WBGene00010451		K01A11.3	K01A11.3	11.0328	6.63771	13.3568	26.2819	16.837	28.8978	1	1.20785	0.0848411	2.96963	2.30993	NA
WBGene00005148	srd-71	C13B7.4	C13B7.4	1.10328	2.21257	0.890455	2.92021	2.97123	3.72875	1	1.20712	0.466074	0.531268	2.30876	NA
WBGene00021572	srd-72	Y45G12C.9	Y45G12C.9	1.10328	2.21257	0.890455	2.92021	2.97123	3.72875	1	1.20712	0.466074	0.531268	2.30876	NA
WBGene00000864	cya-2	F59H6.7	F59H6.7	23.1689	24.3383	26.7136	48.6702	40.6069	82.0325	1	1.20611	0.0152847	5.88335	2.30714	NA
WBGene00022655	srsx-40	ZK105.4	ZK105.4	2.20657	5.53142	3.56182	10.7074	6.93288	8.38968	1	1.20587	0.26437	1.24573	2.30676	NA
WBGene00011698	cyp-34A1	T10H4.10	T10H4.10	6.6197	2.21257	1.78091	11.6809	7.92329	4.66094	1	1.20538	0.310373	1.02909	2.30598	NA
WBGene00011064	adsl-1	R06C7.5	R06C7.5b	227.276	160.411	154.049	610.324	147.571	490.33	0.0411116	1.20498	0.00588209	7.58608	2.30535	1.38604
WBGene00219709	linc-37	K02F3.14	WBGene00219709	3.30985	4.42514	4.45227	8.76064	12.8753	6.52531	1	1.20404	0.244064	1.35697	2.30384	NA
WBGene00001772	gst-24	F37B1.1	F37B1.1	123.568	128.329	172.748	307.596	306.037	366.35	4.74004e-05	1.20303	6.84303e-07	24.6588	2.30223	4.32422
WBGene00021339		Y34F4.4	Y34F4.4	23.1689	55.3142	40.0705	107.074	78.2425	87.6256	0.0402347	1.20294	0.00571256	7.63881	2.30208	1.3954
WBGene00012531		Y32F6B.1	Y32F6B.1	584.74	652.708	574.343	1337.46	1674.79	1157.78	2.05529e-08	1.20283	8.45389e-11	42.1499	2.30191	7.68713
WBGene00018707	oac-31	F52F10.3	F52F10.3	48.5444	64.1645	53.4273	141.144	116.869	123.981	0.00299752	1.20211	0.00014602	14.4228	2.30076	2.52324
WBGene00045108		H01G02.4	H01G02.4.1	1.10328	7.74399	1.78091	5.84043	11.8849	6.52531	1	1.20209	0.333845	0.933926	2.30072	NA
WBGene00003786	npa-1	VC5.3	VC5.3a	13208.5	8150	11798.5	24599.9	25586.3	26073.3	2.16161e-08	1.20157	9.23987e-11	41.976	2.29991	7.66522
WBGene00011649		T09E8.4	T09E8.4	3.30985	1.10628	2.67136	2.92021	5.94247	7.4575	1	1.20013	0.375201	0.786368	2.2976	NA
WBGene00014669		C06G8.3	C06G8.3a	37.5116	42.0388	53.4273	90.5266	87.1562	128.642	0.0153347	1.20007	0.00141116	10.1912	2.2975	1.81432
WBGene00000710	col-137	Y51H4A.9	Y51H4A.9	390.562	113.947	79.2505	136.277	1099.36	104.405	1	1.19908	1	1.00057	2.29593	NA
WBGene00022587		ZC317.1	ZC317.1	6.6197	3.31885	8.90455	9.73404	20.7986	13.0506	1	1.19787	0.181922	1.78185	2.29401	NA
WBGene00018809		F54D10.8	F54D10.8	12.1361	5.53142	3.56182	13.6277	17.8274	16.7794	1	1.19687	0.165444	1.92375	2.29241	NA
WBGene00009101		F25B3.4	F25B3.4	40.8215	21.0194	17.8091	43.8032	99.0411	39.1519	1	1.19629	0.0420535	4.13305	2.2915	NA
WBGene00019662		K11H12.6	K11H12.6a	29.7886	30.976	24.9327	57.4309	71.3096	67.1175	1	1.19596	0.00406764	8.25337	2.29097	NA
WBGene00044074	mltn-5	W02B8.6	W02B8.6	7.72298	4.42514	7.12364	11.6809	13.8658	18.6437	1	1.1948	0.156817	2.00466	2.28913	NA
WBGene00003456	msp-63	K05F1.7	K05F1.7	16.5492	13.2754	8.01409	25.3085	54.4726	6.52531	1	1.19356	0.163537	1.94121	2.28717	NA
WBGene00044487		Y54G2A.44	Y54G2A.44	4.41313	4.42514	2.67136	10.7074	8.9137	6.52531	1	1.19246	0.261593	1.26031	2.28541	NA
WBGene00021464	ugt-31	Y39G10AR.6	Y39G10AR.6	114.741	180.324	111.307	368.92	332.778	225.589	0.00231862	1.19195	0.000101915	15.1009	2.28461	2.63477
WBGene00021526		Y41G9A.2	Y41G9A.2	4.41313	3.31885	12.4664	16.5479	22.7795	7.4575	1	1.19158	0.211464	1.56138	2.28403	NA
WBGene00005657	srr-6	C13D9.1	C13D9.1	9.92955	11.0628	11.5759	27.2553	26.7411	20.5081	1	1.19131	0.0652911	3.39761	2.2836	NA
WBGene00014239		ZK1225.5	ZK1225.5	13.2394	4.42514	2.67136	10.7074	32.6836	2.79656	1	1.19121	0.296051	1.0919	2.28345	NA
WBGene00007440		C08E8.4	C08E8.4	41.9247	91.8216	43.6323	127.516	150.543	125.845	0.0244342	1.19106	0.00277469	8.95	2.28321	1.612
WBGene00008847	fbxb-102	F15A4.13	F15A4.13	8.82626	3.31885	6.23318	8.76064	26.7411	6.52531	1	1.19083	0.232951	1.42275	2.28284	NA
WBGene00014660		B0457.3	Pseudogene:B0457.3	3.30985	4.42514	1.78091	4.86702	14.8562	1.86437	1	1.19	0.366811	0.814439	2.28152	NA
WBGene00020860	nspd-10	T27C10.7	T27C10.7	137.91	47.5702	25.8232	137.25	304.056	39.1519	0.271474	1.18727	0.0938849	2.80647	2.27721	0.566272
WBGene00007131		B0284.1	B0284.1	15.446	13.2754	3.56182	23.3617	31.6932	17.7116	1	1.18603	0.128259	2.31345	2.27526	NA
WBGene00000658	col-83	F33A8.9	F33A8.9	1.10328	4.42514	7.12364	11.6809	11.8849	5.59312	1	1.18598	0.288567	1.1263	2.27517	NA
WBGene00008611	fbxb-68	F09C3.3	F09C3.3	6.6197	19.9131	4.45227	21.4149	32.6836	15.8472	1	1.18527	0.151564	2.05644	2.27406	NA
WBGene00016963		C56C10.6	C56C10.6	28.6854	8.85027	6.23318	30.1755	63.3863	5.59312	1	1.1848	0.209889	1.57219	2.27332	NA
WBGene00014562		Y17D7B.7	Pseudogene:Y17D7B.7	101.502	81.865	72.1268	167.426	274.344	137.964	0.0100362	1.18357	0.000779675	11.289	2.27139	1.99843
WBGene00023262		C54F6.2	Pseudogene:C54F6.2	1.10328	4.42514	1.78091	4.86702	7.92329	3.72875	1	1.18317	0.384712	0.75559	2.27075	NA
WBGene00005240	srh-15	C50B6.6	C50B6.6	1.10328	3.31885	3.56182	6.81383	3.96165	7.4575	1	1.18241	0.355718	0.852953	2.26956	NA
WBGene00010381		H12D21.5	H12D21.5	17.6525	2.21257	2.67136	17.5213	26.7411	6.52531	1	1.18119	0.273623	1.19849	2.26763	NA
WBGene00006048	ssp-31	ZK1225.6	ZK1225.6	55.1641	19.9131	13.3568	47.6968	129.744	22.3725	1	1.17985	0.115731	2.47416	2.26553	NA
WBGene00000620	col-43	ZC513.8	ZC513.8	508.613	420.388	284.055	934.468	669.518	1139.13	0.000546293	1.17875	1.52005e-05	18.7122	2.26381	3.26257
WBGene00001958	hlh-14	C18A3.8	C18A3.8	27.5821	36.5074	33.8373	60.3511	77.2521	83.8968	1	1.17694	0.00369498	8.42794	2.26097	NA
WBGene00235106		F08H9.15	F08H9.15	11.0328	6.63771	7.12364	10.7074	41.5973	3.72875	1	1.1765	0.246872	1.34092	2.26028	NA
WBGene00003999	pgp-5	C05A9.1	C05A9.1a	444.623	559.78	430.09	1133.04	1223.16	882.781	5.1957e-07	1.17562	3.22663e-09	35.042	2.2589	6.28436
WBGene00019379		K04A8.10	K04A8.10	6.6197	9.95656	4.45227	16.5479	12.8753	17.7116	1	1.17554	0.154888	2.02344	2.25877	NA
WBGene00010108		F55C10.4	F55C10.4	23.1689	5.53142	8.90455	6.81383	73.2904	4.66094	1	1.17395	0.283971	1.14799	2.25628	NA
WBGene00017960		F31F4.11	F31F4.11	2.20657	3.31885	13.3568	4.86702	17.8274	20.5081	1	1.17369	0.273388	1.19967	2.25588	NA
WBGene00009855	clec-22	F49A5.3	F49A5.3	17.6525	8.85027	6.23318	36.016	16.837	20.5081	1	1.17355	0.120009	2.4172	2.25567	NA
WBGene00007802	cutl-27	C29E6.4	C29E6.4	8.82626	3.31885	7.12364	7.78723	21.789	13.9828	1	1.17322	0.200812	1.63646	2.25515	NA
WBGene00004903	snf-4	Y46G5A.25	Pseudogene:Y46G5A.25	6.6197	3.31885	4.45227	3.89362	25.7507	2.79656	1	1.17153	0.333472	0.935368	2.2525	NA
WBGene00206497		Y52B11A.18	Y52B11A.18	19.8591	9.95656	4.45227	22.3883	32.6836	21.4403	1	1.17106	0.124549	2.35917	2.25177	NA
WBGene00005013	jmjd-1.1	F43G6.6	F43G6.6	30.8919	5.53142	9.795	15.5745	74.2808	13.9828	1	1.17065	0.199939	1.64282	2.25113	NA
WBGene00219656	anr-48	C33C12.13	C33C12.13	2.20657	1.10628	2.67136	2.92021	6.93288	3.72875	1	1.17029	0.417521	0.657283	2.25057	NA
WBGene00220000		K02F2.11	K02F2.11	7.72298	3.31885	10.6855	16.5479	17.8274	14.915	1	1.1687	0.160266	1.97172	2.24808	NA
WBGene00015309		C01G5.7	C01G5.7a	7.72298	5.53142	6.23318	14.6011	20.7986	8.38968	1	1.16742	0.179301	1.8034	2.2461	NA
WBGene00007869		C32H11.6	C32H11.6	9.92955	4.42514	4.45227	3.89362	31.6932	6.52531	1	1.16637	0.289255	1.12308	2.24446	NA
WBGene00008782	sdz-14	F14B6.1	F14B6.1	16.5492	28.7634	21.3709	62.2979	55.463	31.6944	1	1.16437	0.0288566	4.77615	2.24135	NA
WBGene00018970	clec-68	F56D6.1	F56D6.1	4.41313	1.10628	3.56182	0.973404	13.8658	5.59312	1	1.16436	0.40829	0.683773	2.24133	NA
WBGene00022572		ZC239.14	ZC239.14	11.0328	25.4445	12.4664	33.0957	41.5973	34.4909	1	1.16304	0.0515032	3.79183	2.23929	NA
WBGene00021731		Y49G5A.1	Y49G5A.1	28.6854	33.1885	20.4805	62.2979	86.1658	35.4231	1	1.16267	0.0250562	5.02	2.23871	NA
WBGene00008678	stdh-2	F11A5.12	F11A5.12	3.30985	15.488	13.3568	33.0957	14.8562	24.2369	1	1.16226	0.145348	2.1204	2.23808	NA
WBGene00023417	swm-1	C25E10.9	C25E10.9b.1	50.751	39.8262	69.4555	118.755	133.706	107.202	0.0123386	1.16175	0.00103892	10.7569	2.23729	1.90873
WBGene00013764		Y113G7B.15	Y113G7B.15	2.20657	3.31885	2.67136	4.86702	6.93288	6.52531	1	1.16156	0.343285	0.898125	2.23698	NA
WBGene00022705		ZK354.2	ZK354.2a	154.46	44.2514	32.0564	106.101	331.788	77.3715	0.238518	1.16102	0.0770245	3.12659	2.23615	0.622478
WBGene00005163	srg-5	T12A2.11	T12A2.11	2.20657	1.10628	4.45227	0.973404	12.8753	3.72875	1	1.15976	0.435973	0.60686	2.2342	NA
WBGene00008341	ttr-44	C56A3.2	C56A3.2a	1761.94	1224.66	1165.61	2618.46	3587.27	3065.03	2.06618e-06	1.15918	1.71734e-08	31.7905	2.23331	5.68483
WBGene00020289		T06C10.3	T06C10.3	45.2346	12.1691	10.6855	36.9894	94.0891	20.5081	1	1.15915	0.13712	2.20999	2.23326	NA
WBGene00010092		F55C5.2	Pseudogene:F55C5.2	22.0657	8.85027	12.4664	15.5745	65.3671	15.8472	1	1.15841	0.150219	2.07003	2.23211	NA
WBGene00014003		ZK593.3	ZK593.3	301.196	467.958	479.065	970.484	1031.02	786.766	2.72515e-05	1.15839	3.58254e-07	25.9071	2.23208	4.56461
WBGene00012840	grsp-1	Y43F8C.20	Y43F8C.20	130.187	57.5268	44.5227	134.33	259.488	122.117	0.0834067	1.15462	0.015912	5.81257	2.22626	1.0788
WBGene00017057		D2062.5	D2062.5	4.41313	2.21257	3.56182	0.973404	20.7986	0.932187	1	1.1525	0.447836	0.576123	2.22298	NA
WBGene00018543	ugt-32	F47C10.6	F47C10.6	46.3379	73.0148	51.6464	151.851	126.773	100.676	0.0136747	1.15085	0.00120639	10.4805	2.22044	1.86408
WBGene00198692		C09H10.13	C09H10.13	2.20657	4.42514	1.78091	3.89362	11.8849	2.79656	1	1.15037	0.38835	0.744102	2.21971	NA
WBGene00007853		C31G12.4	C31G12.4b	49.6477	13.2754	27.6041	57.4309	75.2713	68.0497	1	1.15017	0.0331808	4.53643	2.2194	NA
WBGene00021412	cyp-29A3	Y38C9B.1	Y38C9B.1	121.361	130.542	93.4977	263.793	240.67	260.08	0.000160418	1.15015	3.18275e-06	21.7031	2.21937	3.79475
WBGene00018885	drd-5	F55E10.6	F55E10.6	538.402	469.064	512.902	1177.82	1070.63	1125.15	2.13235e-12	1.14973	4.6434e-15	61.4062	2.21872	11.6711
WBGene00007460		C08F11.13	C08F11.13a.1	197.488	264.402	251.999	515.904	572.458	495.924	1.31496e-06	1.14909	9.75692e-09	32.8891	2.21774	5.88109
WBGene00019257	dhhc-13	H32C10.3	H32C10.3	19.8591	7.74399	1.78091	23.3617	37.6356	3.72875	1	1.14819	0.287463	1.13147	2.21636	NA
WBGene00014814		R03D7.3	Pseudogene:R03D7.3	28.6854	26.5508	32.9468	73.9787	57.4439	64.3209	1	1.14725	0.00574326	7.62914	2.21491	NA
WBGene00010135		F55H12.4	F55H12.4	3656.28	2874.13	2397.1	6251.2	7547.92	5968.79	1.77994e-07	1.14708	9.61821e-10	37.4008	2.21465	6.74959
WBGene00045024	C43F9.11	C43F9.11	C43F9.11b	4.41313	1.10628	5.34273	6.81383	11.8849	5.59312	1	1.1468	0.326516	0.962666	2.21422	NA
WBGene00013832		ZC15.3	ZC15.3	13.2394	8.85027	8.01409	16.5479	21.789	27.9656	1	1.14528	0.104983	2.62817	2.21189	NA
WBGene00018196	nep-13	F39E9.4	F39E9.4	34.2018	9.95656	8.90455	29.2021	79.2329	8.38968	1	1.14242	0.199662	1.64484	2.20751	NA
WBGene00020483		T13C5.2	T13C5.2	12.1361	2.21257	1.78091	5.84043	26.7411	2.79656	1	1.14184	0.370649	0.801487	2.20662	NA
WBGene00012916		Y46G5A.28	Y46G5A.28	11.0328	13.2754	4.45227	27.2553	19.8082	15.8472	1	1.14181	0.138487	2.19469	2.20657	NA
WBGene00219576	anr-13	F01G4.7	F01G4.7	27.5821	8.85027	30.2755	51.5904	31.6932	64.3209	1	1.14041	0.0623833	3.47286	2.20444	NA
WBGene00017231		F07G11.4	F07G11.4	2.20657	2.21257	1.78091	2.92021	7.92329	2.79656	1	1.13959	0.428701	0.62634	2.20319	NA
WBGene00019472	cyp-35B1	K07C6.4	K07C6.4	24.2722	23.232	14.2473	41.8564	51.5014	41.9484	1	1.13925	0.0256503	4.97944	2.20266	NA
WBGene00005444	srh-237	T05E12.7	T05E12.7a	239.412	338.523	302.755	650.234	641.787	647.87	5.02155e-07	1.1389	3.03747e-09	35.1597	2.20213	6.29916
WBGene00001875	his-1	T10C6.14	T10C6.14	3.30985	5.53142	2.67136	7.78723	10.8945	6.52531	1	1.13884	0.29298	1.10588	2.20204	NA
WBGene00005690	sru-27	C38C3.2	C38C3.2	3.30985	3.31885	2.67136	0.973404	13.8658	5.59312	1	1.13742	0.401589	0.703564	2.19988	NA
WBGene00020611		T20D4.5	T20D4.5	71.7134	68.5896	41.8514	134.33	161.437	103.473	0.0185245	1.13696	0.00187795	9.66516	2.19917	1.73225
WBGene00001700	grd-11	K02E2.2	K02E2.2	20.9624	4.42514	6.23318	18.4947	20.7986	29.83	1	1.1368	0.166219	1.91671	2.19892	NA
WBGene00010136		F55H12.5	F55H12.5	94.8823	29.8697	16.0282	88.5798	195.111	25.1691	0.346045	1.13643	0.135783	2.22511	2.19836	0.460868
WBGene00044395		R12C12.10	R12C12.10	14.3427	9.95656	5.34273	7.78723	52.4918	4.66094	1	1.13582	0.275824	1.18755	2.19743	NA
WBGene00014871		Y37H9A.5	Y37H9A.5.1	66.197	74.121	60.5509	146.011	142.619	151.947	0.00167749	1.13569	6.7105e-05	15.8908	2.19723	2.77534
WBGene00011385		T02G6.2	T02G6.2a	2.20657	4.42514	8.01409	10.7074	5.94247	15.8472	1	1.13534	0.274963	1.19182	2.1967	NA
WBGene00206368		Y39F10C.3	Y39F10C.3	9.92955	2.21257	2.67136	8.76064	20.7986	2.79656	1	1.13388	0.342492	0.90108	2.19447	NA
WBGene00044768		M117.7	Pseudogene:M117.7	1.10328	7.74399	3.56182	11.6809	9.90411	5.59312	1	1.13375	0.322669	0.978099	2.19429	NA
WBGene00021279		Y23H5B.8	Y23H5B.8	18.7558	38.7199	18.6995	41.8564	76.2617	48.4737	1	1.13351	0.0354586	4.42295	2.19392	NA
WBGene00011594		T07G12.3	T07G12.3	30.8919	15.488	18.6995	20.4415	94.0891	27.9656	1	1.13138	0.110703	2.54416	2.19069	NA
WBGene00016742		C48B6.4	C48B6.4	57.3707	14.3817	21.3709	52.5638	129.744	21.4403	1	1.13131	0.126218	2.33842	2.19057	NA
WBGene00020971		W03B1.1	Pseudogene:W03B1.1	2.20657	3.31885	3.56182	6.81383	0.990411	12.1184	1	1.13114	0.40191	0.702605	2.19031	NA
WBGene00017270	numr-1	F08F8.5	F08F8.5	12.1361	35.4011	17.8091	48.6702	45.5589	48.4737	1	1.13079	0.0431004	4.09146	2.18978	NA
WBGene00011804		T16G12.3	T16G12.3	3696	2229.16	2983.02	6369.96	5603.75	7506.9	4.49194e-06	1.12885	4.34739e-08	29.988	2.18684	5.34757
WBGene00012231		W04A4.2	W04A4.2	538.402	458.002	418.514	1045.44	963.67	1082.27	3.88556e-09	1.12882	1.34752e-11	45.7441	2.1868	8.41055
WBGene00077670	K02E2.9	K02E2.9	Pseudogene:K02E2.9	1.10328	3.31885	0.890455	3.89362	1.98082	5.59312	1	1.12776	0.47637	0.507161	2.1852	NA
WBGene00007124		B0250.7	B0250.7b	33.0985	77.4399	32.9468	87.6064	83.1945	141.692	0.0874475	1.12769	0.0171876	5.67711	2.18508	1.05825
WBGene00018745		F53C3.1	F53C3.1	26.4788	5.53142	7.12364	19.4681	55.463	10.2541	1	1.12673	0.216522	1.52728	2.18363	NA
WBGene00020708	dmd-8	T22H9.4	T22H9.4	45.2346	30.976	35.6182	71.0585	87.1562	85.7612	0.028697	1.12655	0.00346706	8.54377	2.18336	1.54216
WBGene00017398	slc-17.6	F12B6.2	F12B6.2e	41.9247	198.025	150.487	426.351	266.421	159.404	0.12209	1.12528	0.0281082	4.82142	2.18144	0.91332
WBGene00044042		Y46G5A.37	Pseudogene:Y46G5A.37	1.10328	1.10628	2.67136	1.94681	7.92329	0.932187	1	1.12462	0.510127	0.433807	2.18044	NA
WBGene00011909		T22A3.6	T22A3.6	4.41313	5.53142	3.56182	6.81383	18.8178	3.72875	1	1.12296	0.311657	1.02364	2.17793	NA
WBGene00019789		M116.2	Pseudogene:M116.2	401.595	317.504	332.14	746.601	613.065	928.458	1.81388e-05	1.12276	2.10755e-07	26.9319	2.17763	4.74139
WBGene00235389		C46G7.111	C46G7.111	23.1689	9.95656	11.5759	34.0691	22.7795	40.084	1	1.12236	0.0806641	3.05147	2.17703	NA
WBGene00013073	hmit-1.1	Y51A2D.4	Y51A2D.4	330.985	180.324	274.26	463.34	635.844	610.583	0.0007523	1.12161	2.24495e-05	17.9693	2.17589	3.12361
WBGene00021156		Y4C6B.2	Y4C6B.2a	77.2298	103.991	71.2364	174.239	209.967	164.065	0.00274276	1.12155	0.000129407	14.6504	2.1758	2.56181
WBGene00018688		F52D2.6	F52D2.6	12.1361	9.95656	9.795	23.3617	18.8178	27.0334	1	1.12099	0.0924139	2.83181	2.17497	NA
WBGene00017233	lmd-4	F07G11.9	F07G11.9	12.1361	8.85027	12.4664	28.2287	12.8753	31.6944	1	1.1201	0.114558	2.49019	2.17361	NA
WBGene00017090		E01A2.8	E01A2.8	1.10328	3.31885	3.56182	10.7074	3.96165	2.79656	1	1.11912	0.409083	0.681463	2.17214	NA
WBGene00018594	aman-3	F48C1.1	F48C1.1	236.103	265.508	260.013	637.58	591.276	426.01	2.67543e-05	1.11901	3.4956e-07	25.9545	2.17198	4.57261
WBGene00020354		T08B6.5	T08B6.5	8.82626	11.0628	2.67136	16.5479	19.8082	12.1184	1	1.11827	0.201632	1.63052	2.17087	NA
WBGene00001721	grl-12	F28A12.2	F28A12.2	5.51641	5.53142	9.795	13.6277	20.7986	11.1862	1	1.11762	0.185198	1.75541	2.16989	NA
WBGene00012249		W04E12.4	W04E12.4	34.2018	5.53142	1.78091	8.76064	76.2617	4.66094	1	1.11637	0.357202	0.847707	2.16801	NA
WBGene00018993	nhr-266	F56H1.2	F56H1.2	4.41313	3.31885	3.56182	7.78723	14.8562	1.86437	1	1.11621	0.357363	0.847138	2.16776	NA
WBGene00021487	comt-3	Y40B10A.2	Y40B10A.2	301.196	283.209	294.74	648.287	582.362	674.904	8.05954e-09	1.11609	3.05507e-11	44.1413	2.16759	8.09369
WBGene00044281		R04A9.7	R04A9.7	17.6525	32.0822	16.0282	44.7766	50.511	46.6094	1	1.11585	0.0308992	4.65855	2.16722	NA
WBGene00018143	oac-23	F37C4.3	F37C4.3	24.2722	3.31885	4.45227	14.6011	38.626	15.8472	1	1.11567	0.241251	1.37327	2.16696	NA
WBGene00002015	hsp-16.1	T27E4.8	T27E4.8	148.943	111.735	128.225	352.372	319.903	170.59	0.00852752	1.11555	0.000610042	11.7451	2.16677	2.06918
WBGene00044313		M02D8.7	M02D8.7	4.41313	6.63771	8.01409	10.7074	15.8466	14.915	1	1.11373	0.193024	1.69438	2.16405	NA
WBGene00009682	msd-2	F44D12.5	F44D12.5	391.665	117.266	84.5932	391.309	784.406	108.134	0.508531	1.11345	0.256118	1.28962	2.16363	0.293683
WBGene00020293	nep-20	T06D4.4	T06D4.4	24.2722	7.74399	8.90455	10.7074	68.3384	9.32187	1	1.11328	0.240913	1.37524	2.16337	NA
WBGene00018571		F47F2.3	F47F2.3	6.6197	2.21257	6.23318	4.86702	13.8658	13.9828	1	1.11297	0.282975	1.15275	2.16291	NA
WBGene00015371		C03A7.13	C03A7.13	15.446	14.3817	7.12364	22.3883	33.674	23.3047	1	1.11288	0.0967134	2.75892	2.16277	NA
WBGene00019229	ipla-5	H23L24.2	H23L24.2	14.3427	4.42514	2.67136	10.7074	30.7028	4.66094	1	1.11224	0.30419	1.05574	2.16182	NA
WBGene00219326		F36D3.16	F36D3.16	31.9952	7.74399	8.90455	22.3883	70.3192	12.1184	1	1.11163	0.201403	1.63217	2.16089	NA
WBGene00011023		R05A10.6	R05A10.6	13.2394	8.85027	8.01409	9.73404	33.674	21.4403	1	1.11102	0.157763	1.99554	2.15999	NA
WBGene00005444	srh-237	T05E12.7	T05E12.7b	87.1593	209.088	157.61	299.809	332.778	347.706	0.00779911	1.11069	0.000544724	11.956	2.15949	2.10796
WBGene00021492	comt-5	Y40B10A.7	Y40B10A.7	58.474	56.4205	68.565	120.702	149.552	126.777	0.00494305	1.11067	0.000285864	13.1608	2.15946	2.30601
WBGene00009136	lurp-3	F25H9.3	F25H9.3	1.10328	8.85027	4.45227	12.6543	11.8849	6.52531	1	1.10957	0.311047	1.02623	2.15781	NA
WBGene00013705		Y106G6E.1	Y106G6E.1	4.41313	1.10628	0.890455	5.84043	6.93288	0.932187	1	1.10858	0.483914	0.490029	2.15633	NA
WBGene00000485	che-3	F18C12.1	F18C12.1	87.1593	55.3142	119.321	192.734	126.773	246.097	0.0322331	1.10779	0.00414125	8.22082	2.15516	1.4917
WBGene00000140	anc-1	ZK973.6	ZK973.6	5434.77	2031.14	4317.81	6697.99	6122.72	12572.4	0.130758	1.10764	0.031374	4.63238	2.15492	0.88353
WBGene00021971		Y57G7A.8	Pseudogene:Y57G7A.8	29.7886	32.0822	25.8232	64.2447	51.5014	72.7106	1	1.1073	0.0095178	6.72299	2.15442	NA
WBGene00002188	kgb-2	ZC416.4	ZC416.4	46.3379	55.3142	47.1941	114.862	100.032	105.337	0.00948959	1.10661	0.000714073	11.4523	2.15339	2.02275
WBGene00019952	fbxb-74	R08C7.9	R08C7.9	5.51641	9.95656	4.45227	26.2819	9.90411	6.52531	1	1.10656	0.25283	1.3076	2.15331	NA
WBGene00020080	math-37	R52.9	R52.9	31.9952	43.1451	26.7136	48.6702	66.3576	103.473	1	1.10593	0.019421	5.46321	2.15238	NA
WBGene00019213		H20E11.1	H20E11.1b	17.6525	27.6571	17.8091	50.617	30.7028	54.0669	1	1.10532	0.0385076	4.28246	2.15146	NA
WBGene00018236	fbxb-71	F40F4.1	F40F4.1	11.0328	12.1691	10.6855	20.4415	35.6548	16.7794	1	1.10477	0.108146	2.58111	2.15065	NA
WBGene00008894		F16H6.4	F16H6.4	4.41313	3.31885	6.23318	3.89362	19.8082	6.52531	1	1.10412	0.319413	0.991347	2.14968	NA
WBGene00021345		Y37B11A.3	Y37B11A.3	315.539	329.673	293.85	630.766	591.276	795.156	1.30387e-06	1.10408	9.56951e-09	32.9268	2.14962	5.88477
WBGene00019591	fbxc-25	K09F6.8	K09F6.8	3.30985	1.10628	2.67136	4.86702	1.98082	8.38968	1	1.10307	0.434428	0.610957	2.14811	NA
WBGene00009956		F53B2.5	F53B2.5	35.3051	19.9131	8.90455	25.3085	95.0795	16.7794	1	1.10203	0.168718	1.8943	2.14656	NA
WBGene00013452		Y67A10A.3	Y67A10A.3b	38.6149	5.53142	13.3568	22.3883	82.2041	18.6437	1	1.10176	0.198334	1.6546	2.14616	NA
WBGene00000617	col-40	T13B5.4	T13B5.4	11.0328	16.5943	7.12364	25.3085	19.8082	28.8978	1	1.10129	0.107957	2.58387	2.14547	NA
WBGene00077689		Y105E8A.34	Pseudogene:Y105E8A.34	4.41313	2.21257	7.12364	8.76064	8.9137	12.1184	1	1.10088	0.28108	1.16186	2.14486	NA
WBGene00007457		C08F11.10	C08F11.10	55.1641	12.1691	12.4664	53.5372	106.964	10.2541	1	1.10048	0.201211	1.63356	2.14427	NA
WBGene00019361		K03E5.2	K03E5.2c.1	158.873	108.416	236.861	109.021	487.282	485.67	0.114945	1.10035	0.0256607	4.97874	2.14407	0.939511
WBGene00007641		C17E4.1	C17E4.1b	11.0328	4.42514	5.34273	12.6543	16.837	14.915	1	1.10005	0.197287	1.66235	2.14362	NA
WBGene00015458		C04G6.10	C04G6.10	3.30985	2.21257	4.45227	1.94681	15.8466	3.72875	1	1.09909	0.404065	0.696195	2.14219	NA
WBGene00007613		C15H11.1	C15H11.1	40.8215	7.74399	11.5759	26.2819	89.137	13.0506	1	1.09785	0.209037	1.57808	2.14035	NA
WBGene00013904	ugt-6	ZC455.4	ZC455.4	343.121	246.701	223.504	511.037	702.202	525.754	0.000258926	1.09775	5.8472e-06	20.5376	2.14021	3.58682
WBGene00022752		ZK484.6	ZK484.6	37.5116	29.8697	28.4945	44.7766	90.1274	69.914	1	1.09709	0.0167344	5.72402	2.13922	NA
WBGene00020610		T20D4.4	T20D4.4	62.8871	48.6765	17.8091	106.101	102.012	67.1175	0.132017	1.09616	0.0317825	4.61019	2.13785	0.87937
WBGene00020081	sdz-29	R52.10	Pseudogene:R52.10	9.92955	14.3817	8.01409	30.1755	22.7795	15.8472	1	1.09563	0.120256	2.41398	2.13706	NA
WBGene00194894		T05B4.14	T05B4.14	11.0328	12.1691	3.56182	10.7074	39.6165	6.52531	1	1.09506	0.263133	1.2522	2.13622	NA
WBGene00219661	linc-45	C44B11.9	WBGene00219661	13.2394	16.5943	7.12364	20.4415	34.6644	23.3047	1	1.09484	0.108781	2.57185	2.13589	NA
WBGene00009502		F37A8.2	F37A8.2	22.0657	4.42514	2.67136	9.73404	48.5302	3.72875	1	1.09442	0.34494	0.891985	2.13527	NA
WBGene00015271		C01B4.7	C01B4.7	108.122	97.353	124.664	244.324	206.996	254.487	0.000452646	1.09378	1.19012e-05	19.1791	2.13433	3.34424
WBGene00021219		Y19D10A.4	Y19D10A.4	108.122	97.353	124.664	244.324	206.996	254.487	0.000452646	1.09378	1.19012e-05	19.1791	2.13433	3.34424
WBGene00023277		F29C4.3	Pseudogene:F29C4.3	5.51641	5.53142	4.45227	8.76064	15.8466	8.38968	1	1.09279	0.250899	1.31829	2.13286	NA
WBGene00013826		Y116F11B.10	Pseudogene:Y116F11B.10b	41.9247	25.4445	73.9077	98.3138	63.3863	140.76	0.126399	1.09209	0.0298011	4.72073	2.13183	0.898256
WBGene00044763		ZK688.12	ZK688.12	16.5492	6.63771	9.795	29.2021	32.6836	8.38968	1	1.09178	0.179011	1.80581	2.13137	NA
WBGene00008486	ugt-44	F01D4.2	F01D4.2	1556.73	1792.18	1650.01	3766.1	2804.84	4078.32	7.87208e-08	1.09116	3.99985e-10	39.1129	2.13045	7.10391
WBGene00010072		F54F12.1	F54F12.1	56.2674	9.95656	14.2473	36.9894	105.974	27.9656	1	1.09019	0.160604	1.96853	2.12901	NA
WBGene00045480		F14F3.5	F14F3.5	8.82626	7.74399	9.795	18.4947	23.7699	13.9828	1	1.08883	0.140837	2.16879	2.12702	NA
WBGene00010876		M05D6.3	M05D6.3	20.9624	9.95656	8.01409	17.5213	60.4151	4.66094	1	1.08812	0.253501	1.30391	2.12597	NA
WBGene00013429		Y66D12A.3	Y66D12A.3	77.2298	25.4445	45.4132	75.9255	157.475	81.1003	0.133039	1.08697	0.0322002	4.58781	2.12427	0.876021
WBGene00009487	clec-232	F36G9.11	F36G9.11	15.446	7.74399	14.2473	18.4947	24.7603	36.3553	1	1.08598	0.108419	2.57711	2.12281	NA
WBGene00013988		ZK512.10	ZK512.10	8.82626	3.31885	2.67136	5.84043	19.8082	5.59312	1	1.08459	0.33138	0.943497	2.12077	NA
WBGene00004157	pqn-75	W03D2.1	W03D2.1d	524.059	315.291	120.211	586.963	745.78	698.208	0.049882	1.08341	0.00771624	7.09818	2.11904	1.30206
WBGene00219581	anr-20	F16A11.10	F16A11.10	8.82626	7.74399	10.6855	8.76064	25.7507	23.3047	1	1.08086	0.172883	1.85776	2.1153	NA
WBGene00009846		F48F5.2	Pseudogene:F48F5.2	65.0937	9.95656	20.4805	36.016	134.696	30.7622	1	1.07843	0.169462	1.88769	2.11173	NA
WBGene00044501		C55C3.8	C55C3.8	6.6197	3.31885	1.78091	4.86702	18.8178	0.932187	1	1.07838	0.430909	0.620373	2.11166	NA
WBGene00010920		M117.4	M117.4	82.7462	12.1691	19.59	71.0585	148.562	21.4403	0.41435	1.07617	0.179689	1.8002	2.10844	0.382633
WBGene00020691	igdb-3	T22E5.3	T22E5.3	11.0328	4.42514	7.12364	10.7074	24.7603	12.1184	1	1.07538	0.214347	1.54182	2.10728	NA
WBGene00019086		F59A6.4	F59A6.4	40.8215	15.488	13.3568	31.1489	104.984	10.2541	1	1.07385	0.201649	1.63039	2.10504	NA
WBGene00017817		F26B1.5	F26B1.5	11.0328	5.53142	3.56182	1.94681	34.6644	5.59312	1	1.07343	0.369752	0.804499	2.10442	NA
WBGene00009429		F35E12.5	F35E12.5	147.84	230.107	269.808	391.309	521.947	451.179	0.00157336	1.07245	6.15247e-05	16.0551	2.103	2.80317
WBGene00019234	ugt-8	H23N18.3	H23N18.3	69.5068	64.1645	56.9891	141.144	162.427	96.9475	0.0165968	1.07212	0.001596	9.96435	2.10252	1.77998
WBGene00005574	sri-62	F34D6.5	F34D6.5	1.10328	2.21257	0.890455	3.89362	3.96165	0.932187	1	1.07175	0.541355	0.373035	2.10199	NA
WBGene00195010		Y37E11AL.12	Y37E11AL.12	4.41313	2.21257	0.890455	0.973404	11.8849	2.79656	1	1.07106	0.489488	0.477652	2.10098	NA
WBGene00013313		Y57G11C.18	Y57G11C.18	15.446	8.85027	12.4664	24.3351	27.7315	25.1691	1	1.0703	0.0918315	2.84197	2.09987	NA
WBGene00021034	enu-3.4	W05F2.2	W05F2.2	182.042	99.5656	162.063	280.34	290.191	361.689	0.00358874	1.07024	0.000186412	13.9633	2.09978	2.44506
WBGene00010934	fbxa-118	M162.8	M162.8	1.10328	2.21257	3.56182	6.81383	5.94247	1.86437	1	1.07019	0.453045	0.563024	2.09971	NA
WBGene00010933		M162.7	M162.7	39.7182	7.74399	14.2473	30.1755	85.1754	13.9828	1	1.06947	0.199077	1.64913	2.09866	NA
WBGene00000860	cwp-2	C37H5.11	C37H5.11	1.10328	2.21257	1.78091	7.78723	1.98082	0.932187	1	1.06707	0.525253	0.403567	2.09517	NA
WBGene00001604	gln-3	Y105C5B.28	Y105C5B.28b	10081.8	5380.97	5592.95	15301.9	15126.6	13674.3	0.000248492	1.06673	5.54891e-06	20.6378	2.09468	3.60469
WBGene00011466		T05C12.1	T05C12.1	36.4083	24.3383	8.90455	26.2819	106.964	12.1184	1	1.06574	0.207811	1.58661	2.09324	NA
WBGene00017190		F07B7.12	F07B7.12	5.51641	4.42514	19.59	20.4415	18.8178	23.3047	1	1.0636	0.199179	1.64839	2.09013	NA
WBGene00017055		D2062.1	D2062.1	19.8591	5.53142	5.34273	11.6809	50.511	1.86437	1	1.06308	0.348628	0.878444	2.08938	NA
WBGene00009371		F33H2.8	F33H2.8b	26.4788	26.5508	16.9186	36.9894	70.3192	38.2197	1	1.06181	0.0475048	3.92742	2.08755	NA
WBGene00202501		Y57E12B.10	Y57E12B.10	2.20657	1.10628	1.78091	3.89362	3.96165	2.79656	1	1.0616	0.491266	0.473752	2.08724	NA
WBGene00017714		F22F1.2	F22F1.2	26.4788	28.7634	16.9186	60.3511	48.5302	41.0162	1	1.0613	0.0316761	4.61594	2.08681	NA
WBGene00008727		F13A7.12	F13A7.12	6.6197	15.488	22.2614	26.2819	58.4343	8.38968	1	1.0612	0.207969	1.58551	2.08666	NA
WBGene00017490	pud-2.1	F15E11.1	F15E11.1	13530.7	15387.3	7678.39	20312	28291.1	27744.7	0.000639759	1.06096	1.86268e-05	18.3248	2.08632	3.19398
WBGene00017500	pud-2.2	F15E11.14	F15E11.14	13530.7	15387.3	7678.39	20312	28291.1	27744.7	0.000639759	1.06096	1.86268e-05	18.3248	2.08632	3.19398
WBGene00017113	srz-24	E03H12.6	E03H12.6a	2.20657	1.10628	3.56182	2.92021	6.93288	4.66094	1	1.06087	0.446807	0.578738	2.08619	NA
WBGene00001210	egl-46	K11G9.4	K11G9.4	35.3051	28.7634	59.6605	82.7394	90.1274	86.6934	0.0631004	1.06024	0.0107992	6.49807	2.08528	1.19997
WBGene00220089		T23G11.12	T23G11.12	38.6149	6.63771	12.4664	42.8298	40.6069	36.3553	1	1.05832	0.133164	2.25522	2.08251	NA
WBGene00018081		F36A4.2	F36A4.2	15.446	7.74399	11.5759	22.3883	43.5781	6.52531	1	1.0583	0.213175	1.54973	2.08248	NA
WBGene00077699		C45B11.8	C45B11.8	3.30985	4.42514	2.67136	1.94681	17.8274	1.86437	1	1.05812	0.442478	0.589847	2.08221	NA
WBGene00012810	nceh-1	Y43F8A.3	Y43F8A.3b	116.948	106.203	83.7027	200.521	247.603	189.234	0.00251016	1.05753	0.000112764	14.91	2.08136	2.6003
WBGene00000389	cdc-25.4	R05H5.2	R05H5.2	18.7558	7.74399	8.01409	5.84043	58.4343	7.4575	1	1.05749	0.299219	1.07767	2.0813	NA
WBGene00003091	lys-2	Y22F5A.5	Y22F5A.5	3935.41	4736	3641.07	9281.41	8294.69	8042.91	3.08857e-10	1.05727	7.97115e-13	51.2892	2.08099	9.51024
WBGene00000556	cnc-2	R09B5.3	R09B5.3	27.5821	73.0148	31.1659	48.6702	125.782	98.8118	0.177479	1.05561	0.0498865	3.84527	2.0786	0.750854
WBGene00020361	fbxc-19	T08E11.5	T08E11.5	9.92955	16.5943	13.3568	22.3883	29.7123	30.7622	1	1.05523	0.088825	2.89554	2.07805	NA
WBGene00011425		T04B2.7	T04B2.7	25.3755	9.95656	6.23318	29.2021	45.5589	11.1862	1	1.05505	0.198163	1.65586	2.0778	NA
WBGene00022245	acp-6	Y73B6BL.24	Y73B6BL.24	25749.5	26558.6	19186.6	52750.7	46955.4	48815.8	5.89474e-09	1.05482	2.18694e-11	44.7958	2.07745	8.22953
WBGene00015077		B0238.13	B0238.13	1.10328	2.21257	0.890455	0.973404	3.96165	3.72875	1	1.05461	0.547769	0.361329	2.07716	NA
WBGene00001879	his-5	F45F2.3	F45F2.3	22.0657	25.4445	10.6855	40.883	46.5493	32.6266	1	1.05414	0.0647386	3.41163	2.07648	NA
WBGene00219286		C04F12.16	C04F12.16	16.5492	18.8068	8.90455	27.2553	44.5685	19.5759	1	1.0535	0.112475	2.5191	2.07555	NA
WBGene00011954		T23F11.2	T23F11.2	90.4692	12.1691	16.0282	76.8989	145.59	23.3047	0.437913	1.05319	0.197228	1.66278	2.07511	0.358612
WBGene00019565	cyp-35A3	K09D9.2	K09D9.2	19.8591	4.42514	17.8091	22.3883	29.7123	35.4231	1	1.0512	0.142808	2.14744	2.07225	NA
WBGene00018497		F46F5.6	F46F5.6	66.197	12.1691	3.56182	43.8032	103.003	22.3725	1	1.05089	0.254759	1.29702	2.07181	NA
WBGene00016927	nhr-172	C54F6.9	C54F6.9	6.6197	7.74399	3.56182	24.3351	7.92329	4.66094	1	1.05005	0.313107	1.01753	2.07059	NA
WBGene00018941		F56C3.4	F56C3.4	3.30985	4.42514	4.45227	8.76064	11.8849	4.66094	1	1.04953	0.329844	0.94951	2.06986	NA
WBGene00015456		C04G6.6	C04G6.6	175.422	167.049	182.543	366.973	343.673	376.604	6.84071e-06	1.04948	7.06195e-08	29.0477	2.06979	5.1649
WBGene00010189		F57B1.6	F57B1.6a	66.197	73.0148	57.8796	113.888	133.706	159.404	0.0103899	1.04913	0.000816174	11.2041	2.06928	1.98339
WBGene00044780		F18E9.8	F18E9.8	1.10328	2.21257	2.67136	3.89362	2.97123	5.59312	1	1.04822	0.471496	0.518469	2.06798	NA
WBGene00014949		Y75B12A.1	Pseudogene:Y75B12A.1	145.633	123.904	163.844	280.34	240.67	375.671	0.00207601	1.04757	8.68983e-05	15.402	2.06705	2.68277
WBGene00013785	nep-23	Y116A8C.4	Y116A8C.4.2	49.6477	19.9131	16.9186	35.0426	123.801	19.5759	1	1.04746	0.164415	1.93314	2.06689	NA
WBGene00022071		Y67D8C.7	Y67D8C.7	1.10328	2.21257	1.78091	0.973404	3.96165	5.59312	1	1.04705	0.520033	0.413828	2.0663	NA
WBGene00021581	clec-70	Y46C8AL.3	Y46C8AL.3	6.6197	13.2754	27.6041	25.3085	47.5397	26.1012	1	1.04534	0.14075	2.16974	2.06385	NA
WBGene00009252		F29D10.3	F29D10.3	3.30985	6.63771	1.78091	7.78723	4.95206	11.1862	1	1.04492	0.363106	0.827121	2.06326	NA
WBGene00043049		F32H2.11	F32H2.11	13.2394	8.85027	4.45227	4.86702	32.6836	16.7794	1	1.0415	0.27207	1.20628	2.05837	NA
WBGene00044142		H13N06.7	H13N06.7	1.10328	2.21257	3.56182	2.92021	2.97123	8.38968	1	1.04137	0.466598	0.53002	2.05819	NA
WBGene00009605		F40G12.10	F40G12.10	75.0232	24.3383	10.6855	31.1489	172.332	22.3725	1	1.04039	0.22459	1.4748	2.05679	NA
WBGene00015660	catp-3	C09H5.2	C09H5.2b	674.106	668.196	809.423	1378.34	1394.5	1654.63	3.17913e-08	1.04012	1.41021e-10	41.1495	2.0564	7.49769
WBGene00011847	chil-26	T19H5.2	T19H5.2	3.30985	1.10628	5.34273	2.92021	9.90411	7.4575	1	1.03861	0.412387	0.67191	2.05424	NA
WBGene00007682		C18D11.6	C18D11.6	1.10328	2.21257	2.67136	3.89362	0.990411	7.4575	1	1.03767	0.505228	0.443937	2.05291	NA
WBGene00004026	phy-3	T20B3.7	T20B3.7	72.8167	27.6571	22.2614	83.7128	103.003	64.3209	0.179505	1.03749	0.0507576	3.81626	2.05265	0.745924
WBGene00021850		Y54F10AM.6	Y54F10AM.6	105.915	49.7828	51.6464	73.9787	276.325	74.575	0.223744	1.03607	0.0696769	3.29062	2.05063	0.650248
WBGene00194667		Y105C5A.1271	Pseudogene:Y105C5A.1271	5.51641	6.63771	9.795	12.6543	15.8466	16.7794	1	1.03556	0.201013	1.635	2.04991	NA
WBGene00044552		Y97E10AR.8	Y97E10AR.8	3.30985	1.10628	0.890455	1.94681	7.92329	0.932187	1	1.03498	0.545948	0.364627	2.04908	NA
WBGene00018308		F41G4.4	F41G4.4	3.30985	4.42514	4.45227	9.73404	4.95206	10.2541	1	1.03163	0.334273	0.932272	2.04433	NA
WBGene00014755		F40F12.8	Pseudogene:F40F12.8	9.92955	7.74399	3.56182	7.78723	31.6932	3.72875	1	1.03126	0.336392	0.924132	2.04381	NA
WBGene00016424		C34H4.1	C34H4.1a	312.229	335.204	243.985	654.128	674.47	491.263	0.000145012	1.0312	2.78351e-06	21.9603	2.04373	3.8386
WBGene00009148		F26D2.3	F26D2.3a	17.6525	14.3817	16.9186	40.883	23.7699	35.4231	1	1.03115	0.0717176	3.24326	2.04365	NA
WBGene00009548		F38H4.4	F38H4.4	81.6429	19.9131	17.8091	73.0053	152.523	17.7116	0.431421	1.02952	0.191445	1.70647	2.04135	0.365099
WBGene00010245		F58D5.6	F58D5.6	11.0328	6.63771	2.67136	9.73404	29.7123	1.86437	1	1.02934	0.374015	0.790281	2.04109	NA
WBGene00008105		C45B11.2	C45B11.2	8.82626	27.6571	15.1377	36.016	52.4918	16.7794	1	1.02918	0.143985	2.13484	2.04086	NA
WBGene00016345		C33E10.1	C33E10.1	7.72298	13.2754	12.4664	29.2021	16.837	22.3725	1	1.02891	0.135634	2.22681	2.04048	NA
WBGene00016976		C56E10.3	C56E10.3a	24.2722	30.976	12.4664	55.484	43.5781	38.2197	1	1.0286	0.0603908	3.52662	2.04004	NA
WBGene00021136		W10G11.3	W10G11.3	242.722	266.614	147.815	518.824	452.618	366.35	0.00370618	1.0282	0.00019459	13.8826	2.03948	2.43107
WBGene00010123		F55G11.2	F55G11.2	126.878	265.508	325.906	538.293	573.448	352.367	0.0260113	1.02542	0.00303047	8.78903	2.03555	1.58484
WBGene00014069		ZK678.3	ZK678.3	48.5444	36.5074	25.8232	62.2979	66.3576	96.0153	1	1.02536	0.0201652	5.39754	2.03547	NA
WBGene00219217		C08F8.15	C08F8.15	6.6197	32.0822	5.34273	42.8298	25.7507	20.5081	1	1.02494	0.219699	1.50634	2.03488	NA
WBGene00019945		R08C7.1	R08C7.1	8.82626	6.63771	0.890455	5.84043	15.8466	11.1862	1	1.02441	0.356753	0.849291	2.03413	NA
WBGene00013474		Y69E1A.2	Y69E1A.2	462.276	126.116	83.7027	395.202	858.687	112.795	0.573546	1.02426	0.316586	1.003	2.03392	0.241432
WBGene00006058	sst-20	F54C1.9	F54C1.9	75.0232	14.3817	16.0282	45.75	151.533	16.7794	1	1.02409	0.224829	1.47328	2.03367	NA
WBGene00013548		Y75B8A.11	Y75B8A.11b	7.72298	13.2754	16.9186	19.4681	17.8274	40.084	1	1.02347	0.150436	2.06782	2.0328	NA
WBGene00018442	sdz-18	F45C12.11	F45C12.11	11.0328	25.4445	4.45227	22.3883	40.6069	19.5759	1	1.02289	0.198309	1.65478	2.03199	NA
WBGene00009470		F36D3.4	F36D3.4	147.84	35.4011	28.4945	118.755	274.344	36.3553	0.388159	1.02208	0.161443	1.96065	2.03085	0.41099
WBGene00016807		C50D2.3	C50D2.3	13.2394	9.95656	6.23318	18.4947	31.6932	9.32187	1	1.02191	0.209559	1.57447	2.0306	NA
WBGene00015592		C08D8.1	C08D8.1	18.7558	32.0822	24.9327	46.7234	62.3959	44.745	1	1.02179	0.033967	4.49637	2.03043	NA
WBGene00015707		C12D5.4	C12D5.4	5.51641	3.31885	8.90455	7.78723	8.9137	19.5759	1	1.02163	0.292097	1.10993	2.03021	NA
WBGene00019814		R02C2.1	R02C2.1	7.72298	5.53142	4.45227	9.73404	14.8562	11.1862	1	1.02116	0.257013	1.28478	2.02954	NA
WBGene00021967		Y57G7A.3	Y57G7A.3a	8.82626	7.74399	0.890455	14.6011	14.8562	5.59312	1	1.02108	0.352539	0.864298	2.02943	NA
WBGene00012547		Y37D8A.5	Y37D8A.5	39.7182	9.95656	9.795	37.9628	68.3384	13.9828	1	1.02067	0.20577	1.60094	2.02886	NA
WBGene00016783	irg-2	C49G7.5	C49G7.5	49.6477	48.6765	41.8514	116.809	97.0603	69.914	0.046036	1.01913	0.00683817	7.31499	2.0267	1.3369
WBGene00019934		R07C12.4	Pseudogene:R07C12.4	24.2722	13.2754	19.59	25.3085	49.5206	41.0162	1	1.01885	0.0758377	3.15192	2.0263	NA
WBGene00000697	col-123	W08D2.6	W08D2.6	11.0328	2.21257	3.56182	8.76064	14.8562	10.2541	1	1.01871	0.321699	0.982028	2.02611	NA
WBGene00004103	pqn-11	C09G1.1	C09G1.1	22.0657	29.8697	31.1659	63.2713	48.5302	56.8634	1	1.01832	0.0218026	5.26147	2.02556	NA
WBGene00018591	npax-2	F48B9.5	F48B9.5	9.92955	8.85027	6.23318	11.6809	25.7507	13.0506	1	1.01825	0.208383	1.58263	2.02546	NA
WBGene00077570		F55B12.11	Pseudogene:F55B12.11	3.30985	5.53142	1.78091	8.76064	6.93288	5.59312	1	1.01666	0.382372	0.763061	2.02323	NA
WBGene00184956		F49C5.12	F49C5.12	13.2394	4.42514	0.890455	5.84043	26.7411	4.66094	1	1.01638	0.408257	0.683871	2.02283	NA
WBGene00001633	gly-8	Y66A7A.6	Y66A7A.6.2	1209.2	611.775	678.526	1615.85	1985.77	1451.42	0.00270458	1.01591	0.000126079	14.6995	2.02218	2.5679
WBGene00021198		Y17G9B.1	Y17G9B.1	9.92955	9.95656	11.5759	25.3085	19.8082	18.6437	1	1.01584	0.133892	2.24679	2.02209	NA
WBGene00005535	sri-23	F59E11.3	Pseudogene:F59E11.3	1.10328	3.31885	2.67136	1.94681	4.95206	7.4575	1	1.01532	0.474705	0.511004	2.02135	NA
WBGene00009854	clec-31	F49A5.2	F49A5.2	30.8919	22.1257	29.385	48.6702	75.2713	42.8806	1	1.0151	0.0339488	4.49728	2.02105	NA
WBGene00005289	srh-68	T21B4.5	T21B4.5	2.20657	2.21257	1.78091	5.84043	1.98082	4.66094	1	1.01496	0.484994	0.487613	2.02085	NA
WBGene00012540		Y37A1B.7	Y37A1B.7	73.92	30.976	62.3318	71.0585	186.197	81.1003	0.165058	1.01495	0.0447424	4.02832	2.02083	0.782362
WBGene00194695		B0462.5	B0462.5	26.4788	29.8697	26.7136	39.9096	65.3671	62.4565	1	1.01488	0.0269834	4.89187	2.02073	NA
WBGene00012271		W05B2.2	W05B2.2	13.2394	1.10628	16.0282	24.3351	18.8178	18.6437	1	1.01475	0.262149	1.25737	2.02055	NA
WBGene00021621		Y47D7A.9	Y47D7A.9	3.30985	3.31885	3.56182	1.94681	16.837	1.86437	1	1.01471	0.460264	0.545252	2.0205	NA
WBGene00008230	pfk-1.2	C50F4.2	C50F4.2	49.6477	14.3817	7.12364	31.1489	100.032	12.1184	1	1.01439	0.255854	1.29105	2.02005	NA
WBGene00008899		F16H6.9	F16H6.9	6.6197	6.63771	1.78091	7.78723	13.8658	8.38968	1	1.01403	0.33062	0.946466	2.01954	NA
WBGene00010285		F58H1.2	F58H1.2	72.8167	43.1451	32.9468	45.75	207.986	46.6094	0.306561	1.01387	0.112592	2.51745	2.01932	0.513484
WBGene00219299		C01G12.16	C01G12.16	1.10328	3.31885	2.67136	2.92021	3.96165	7.4575	1	1.01384	0.467596	0.527651	2.01928	NA
WBGene00001246	elo-8	Y47D3A.30	Y47D3A.30b	46.3379	19.9131	15.1377	34.0691	98.0507	31.6944	1	1.01338	0.130316	2.28874	2.01864	NA
WBGene00012892		Y45F10D.14	Y45F10D.14	19.8591	7.74399	16.9186	24.3351	40.6069	25.1691	1	1.01332	0.120646	2.40892	2.01855	NA
WBGene00003067	lrg-1	F55H2.4	Pseudogene:F55H2.4	1488.33	998.975	1243.97	2676.86	1975.87	2877.66	6.33268e-05	1.01311	9.85731e-07	23.9558	2.01826	4.19841
WBGene00021632		Y47D9A.5	Y47D9A.5.2	15.446	1.10628	0.890455	5.84043	18.8178	10.2541	1	1.01301	0.428406	0.627141	2.01812	NA
WBGene00017553	nep-8	F18A12.4	F18A12.4	48.5444	12.1691	17.8091	30.1755	117.859	10.2541	1	1.0127	0.242588	1.36549	2.01768	NA
WBGene00022322		Y82E9BL.5	Y82E9BL.5	4.41313	7.74399	8.01409	18.4947	15.8466	6.52531	1	1.01238	0.263299	1.25133	2.01724	NA
WBGene00020223		T05A7.6	T05A7.6	112.535	24.3383	26.7136	84.6862	211.948	32.6266	0.396504	1.01112	0.167057	1.90916	2.01548	0.401753
WBGene00219761	linc-143	Y55D5A.11	WBGene00219761	2.20657	3.31885	3.56182	4.86702	7.92329	5.59312	1	1.01051	0.40201	0.702305	2.01462	NA
WBGene00016565		C41D11.6	C41D11.6	39.7182	35.4011	47.1941	67.1649	73.2904	106.269	0.0655445	1.00973	0.0114289	6.39737	2.01353	1.18346
WBGene00016181		C28C12.11	C28C12.11b	39.7182	17.7005	17.8091	42.8298	81.2137	27.0334	1	1.00901	0.105167	2.62538	2.01253	NA
WBGene00017325		F10C1.3	F10C1.3	29.7886	9.95656	4.45227	20.4415	65.3671	2.79656	1	1.00816	0.343836	0.896077	2.01134	NA
WBGene00005131	srd-53	F13G3.2	F13G3.2	7.72298	13.2754	10.6855	10.7074	29.7123	23.3047	1	1.00775	0.181824	1.78265	2.01077	NA
WBGene00009261		F30A10.2	F30A10.2	71.7134	36.5074	48.0846	57.4309	165.399	91.3543	0.152051	1.00765	0.039497	4.23936	2.01063	0.818011
WBGene00020614		T20D4.8	T20D4.8	3.30985	2.21257	1.78091	2.92021	8.9137	2.79656	1	1.00756	0.470924	0.519807	2.01051	NA
WBGene00022622		ZC477.10	Pseudogene:ZC477.10	11.0328	4.42514	1.78091	4.86702	27.7315	1.86437	1	1.00751	0.430904	0.620386	2.01044	NA
WBGene00013315		Y57G11C.20	Y57G11C.20	1.10328	6.63771	7.12364	9.73404	12.8753	7.4575	1	1.00507	0.348134	0.880247	2.00704	NA
WBGene00021797	plep-1	Y52E8A.4	Y52E8A.4	47.4412	27.6571	19.59	72.0319	74.2808	42.8806	1	1.00428	0.0503373	3.83019	2.00594	NA
WBGene00007384	swt-3	C06G8.1	C06G8.1	489.858	357.33	384.676	606.431	854.725	1008.63	0.000795663	1.00405	2.38718e-05	17.8524	2.00562	3.09927
WBGene00016946		C55B7.10	C55B7.10	33.0985	3.31885	6.23318	22.3883	53.4822	9.32187	1	1.00273	0.310732	1.02756	2.00378	NA
WBGene00006946	prx-10	C34E10.4	C34E10.4a	28.6854	76.3336	69.4555	86.633	100.032	163.133	0.126811	1.00188	0.0300273	4.70773	2.00261	0.896844
WBGene00044541		K09H11.11	K09H11.11	44.1313	18.8068	26.7136	52.5638	61.4055	65.2531	1	1.00152	0.0383382	4.28996	2.0021	NA
WBGene00021671		Y48G1BM.6	Y48G1BM.6	114.741	91.8216	117.54	218.043	201.053	230.25	0.00154688	1.0009	5.91357e-05	16.1301	2.00125	2.81054
WBGene00009018		F21D9.4	F21D9.4a	13.2394	14.3817	18.6995	27.2553	41.5973	24.2369	1	1.00081	0.0942674	2.79995	2.00112	NA
WBGene00007570		C14A6.6	C14A6.6	29.7886	16.5943	6.23318	24.3351	69.3288	11.1862	1	1.00076	0.238252	1.39091	2.00106	NA
WBGene00003434	msp-38	K08F4.8	K08F4.8	233.896	64.1645	61.4414	215.122	436.771	67.1175	0.537968	1.00054	0.282716	1.15399	2.00075	0.269243
WBGene00044220		Y102A5C.35	Pseudogene:Y102A5C.35	22.0657	59.7393	40.9609	82.7394	90.1274	72.7106	0.121436	1.00009	0.027769	4.84235	2.00013	0.915654
WBGene00003983	pes-10	Y46G5A.27	Y46G5A.27	23.1689	44.2514	19.59	71.0585	58.4343	43.8128	1	0.999651	0.0512535	3.79997	1.99952	NA
WBGene00019303		K02D10.3	K02D10.3	13.2394	4.42514	6.23318	19.4681	19.8082	8.38968	1	0.999438	0.255318	1.29397	1.99922	NA
WBGene00045269		F46G11.6	F46G11.6	23.1689	21.0194	5.34273	19.4681	58.4343	20.5081	1	0.999015	0.201424	1.63202	1.99863	NA
WBGene00020283		T06A4.3	T06A4.3a	262.581	96.2467	123.773	208.309	522.937	232.115	0.117259	0.998003	0.0264421	4.92687	1.99723	0.930854
WBGene00235277		T04C4.3	T04C4.3	5.51641	1.10628	2.67136	6.81383	8.9137	2.79656	1	0.996274	0.445259	0.582693	1.99484	NA
WBGene00021799		Y53G8AL.1	Y53G8AL.1	84.9528	66.3771	105.074	162.559	132.715	217.2	0.0232962	0.996168	0.00258158	9.08185	1.9947	1.63271
WBGene00016558		C41A3.1	C41A3.1	543.918	402.687	545.849	996.766	865.619	1113.03	2.25945e-05	0.99478	2.86099e-07	26.3413	1.99278	4.646
WBGene00018225	nep-14	F40B5.1	Pseudogene:F40B5.1	22.0657	16.5943	9.795	31.1489	40.6069	24.2369	1	0.99426	0.107871	2.58513	1.99206	NA
WBGene00019783		M70.1	M70.1b	66.197	16.5943	8.01409	58.4043	108.945	13.0506	1	0.99424	0.251801	1.31329	1.99203	NA
WBGene00044521		Y5H2A.4	Y5H2A.4	26.4788	8.85027	5.34273	8.76064	48.5302	23.3047	1	0.993903	0.266398	1.2352	1.99157	NA
WBGene00008862		F15D4.5	F15D4.5	127.981	144.923	152.268	245.298	331.788	270.334	0.000997372	0.993554	3.20415e-05	17.2927	1.99108	3.00114
WBGene00000373	cyp-14A5	F08F3.7	F08F3.7	554.951	939.235	601.947	1451.35	1503.44	1216.5	0.000452646	0.993274	1.18587e-05	19.1859	1.9907	3.34424
WBGene00255375		F08B4.8	F08B4.8	121.361	36.5074	28.4945	109.995	208.977	51.2703	0.316648	0.992911	0.118625	2.43539	1.9902	0.499424
WBGene00003409	mrp-3	E03G2.2	E03G2.2	595.773	398.262	556.534	1005.53	1039.93	1039.39	1.81949e-05	0.991805	2.14248e-07	26.9001	1.98867	4.74005
WBGene00018352	fbxc-20	F42G2.3	F42G2.3	9.92955	4.42514	8.01409	10.7074	20.7986	13.0506	1	0.991327	0.242303	1.36715	1.98801	NA
WBGene00019957		R08E3.1	R08E3.1b	6906.55	4890.88	6754.1	12013.8	11587.8	13238.9	3.9591e-07	0.989681	2.29902e-09	35.7022	1.98575	6.4024
WBGene00012115		T28B8.4	T28B8.4	54.0609	19.9131	10.6855	41.8564	108.945	16.7794	1	0.989203	0.21205	1.55737	1.98509	NA
WBGene00005085	srd-7	C06G8.4	C06G8.4	3.30985	4.42514	3.56182	6.81383	11.8849	3.72875	1	0.988613	0.387096	0.748044	1.98428	NA
WBGene00012426		Y11D7A.1	Pseudogene:Y11D7A.1	14.3427	7.74399	21.3709	31.1489	27.7315	27.9656	1	0.98789	0.123121	2.37716	1.98328	NA
WBGene00012859		Y45F3A.1	Y45F3A.1	28.6854	18.8068	33.8373	45.75	87.1562	28.8978	1	0.987329	0.0862409	2.94318	1.98251	NA
WBGene00021040		W05G11.2	W05G11.2	46.3379	48.6765	41.8514	83.7128	87.1562	99.744	0.0338196	0.985882	0.0044269	8.09985	1.98052	1.47083
WBGene00009501		F37A8.1	F37A8.1	12.1361	4.42514	0.890455	9.73404	20.7986	3.72875	1	0.985651	0.411884	0.673357	1.98021	NA
WBGene00012616	dct-14	Y38H6C.3	Y38H6C.3	3.30985	2.21257	0.890455	1.94681	5.94247	4.66094	1	0.985402	0.508573	0.437001	1.97987	NA
WBGene00013107		Y51H4A.13	Y51H4A.13	70.6101	27.6571	37.3991	52.5638	133.706	82.0325	0.196232	0.985396	0.0574341	3.60997	1.97986	0.70723
WBGene00017636		F20D6.6	F20D6.6	33.0985	14.3817	16.9186	34.0691	81.2137	12.1184	1	0.985361	0.193221	1.69288	1.97981	NA
WBGene00018580		F47G6.3	F47G6.3	35.3051	8.85027	9.795	10.7074	76.2617	19.5759	1	0.985273	0.269727	1.21813	1.97969	NA
WBGene00021700		Y48G9A.6	Y48G9A.6	5.51641	6.63771	2.67136	10.7074	11.8849	6.52531	1	0.985153	0.33038	0.947409	1.97952	NA
WBGene00009904		F49E12.12	F49E12.12	39.7182	38.7199	26.7136	36.016	132.715	39.1519	1	0.985024	0.102473	2.66663	1.97935	NA
WBGene00044412		F40H6.6	F40H6.6	236.103	278.784	218.161	445.819	462.522	540.669	6.23471e-05	0.984842	9.55396e-07	24.016	1.9791	4.20518
WBGene00018465		F45E1.4	F45E1.4	471.102	443.62	391.8	890.665	853.735	838.968	7.14108e-08	0.984808	3.57083e-10	39.3345	1.97905	7.14624
WBGene00015167		B0403.3	B0403.3	129.084	134.967	109.526	265.739	200.063	272.199	0.00251263	0.984642	0.000113483	14.898	1.97882	2.59987
WBGene00016780		C49G7.1	C49G7.1	15.446	6.63771	6.23318	7.78723	40.6069	7.4575	1	0.983391	0.313531	1.01574	1.97711	NA
WBGene00007366		C06B3.7	C06B3.7	31.9952	47.5702	24.9327	60.3511	79.2329	66.1853	1	0.983311	0.0249934	5.02434	1.977	NA
WBGene00022542		ZC190.8	ZC190.8	8.82626	7.74399	11.5759	12.6543	37.6356	5.59312	1	0.983243	0.283503	1.15022	1.9769	NA
WBGene00219756	linc-68	Y49F6A.10	WBGene00219756	1.10328	4.42514	0.890455	5.84043	2.97123	3.72875	1	0.983048	0.516068	0.421745	1.97664	NA
WBGene00018332		F42A9.3	F42A9.3	12.1361	4.42514	5.34273	6.81383	31.6932	4.66094	1	0.981114	0.355661	0.853158	1.97399	NA
WBGene00011611		T08D2.6	T08D2.6	45.2346	56.4205	43.6323	80.7926	82.2041	123.049	0.0558264	0.980143	0.00905902	6.81115	1.97266	1.25316
WBGene00014158		ZK938.1	ZK938.1	261.478	109.522	68.565	262.819	511.052	92.2865	0.264904	0.979812	0.0906727	2.86239	1.97221	0.576912
WBGene00018262	cyp-33C3	F41B5.4	F41B5.4	109.225	67.4833	67.6746	158.665	168.37	153.811	0.0179074	0.979221	0.00178655	9.75686	1.9714	1.74697
WBGene00017277		F09C12.2	F09C12.2	1.10328	3.31885	5.34273	4.86702	10.8945	3.72875	1	0.978949	0.442484	0.589832	1.97103	NA
WBGene00206420		T26G10.7	Pseudogene:T26G10.7	860.561	763.336	644.689	1420.2	1219.2	1828.02	8.29785e-05	0.978466	1.39201e-06	23.2917	1.97037	4.08103
WBGene00021287		Y24D9B.1	Y24D9B.1	119.155	89.609	71.2364	163.532	218.881	167.794	0.0170302	0.977948	0.00164597	9.9076	1.96966	1.76878
WBGene00016660		C45B2.3	C45B2.3	11.0328	2.21257	8.90455	11.6809	22.7795	9.32187	1	0.977208	0.300119	1.07366	1.96865	NA
WBGene00219216		K08D10.14	K08D10.14.1	77.2298	75.2273	86.3741	139.197	174.312	156.607	0.00692894	0.975014	0.00045986	12.2718	1.96566	2.15933
WBGene00020802	btb-2	T25D10.5	T25D10.5	25.3755	21.0194	9.795	16.5479	86.1658	7.4575	1	0.974538	0.280006	1.16706	1.96501	NA
WBGene00198286		R151.16	R151.16	1.10328	1.10628	2.67136	2.92021	4.95206	1.86437	1	0.974444	0.549838	0.357608	1.96488	NA
WBGene00008605	mlt-9	F09B12.1	F09B12.1b.1	495.374	123.904	269.808	316.356	974.565	454.907	0.417159	0.973549	0.181647	1.7841	1.96366	0.379698
WBGene00000730	col-157	T11F9.9	T11F9.9	1905.37	507.784	353.511	846.862	4058.71	523.889	0.626614	0.972729	0.373017	0.79359	1.96255	0.203
WBGene00012863		Y45F3A.8	Y45F3A.8	16.5492	8.85027	11.5759	8.76064	37.6356	26.1012	1	0.972124	0.211734	1.55953	1.96173	NA
WBGene00001310	end-1	F58E10.2	F58E10.2	9.92955	17.7005	6.23318	22.3883	27.7315	15.8472	1	0.971295	0.189475	1.72169	1.9606	NA
00_NOT_FOUND_Y18H1A.12a			Y18H1A.12a	19.8591	3.31885	5.34273	10.7074	35.6548	9.32187	1	0.97031	0.328418	0.955125	1.95926	NA
WBGene00000971	dhs-7	E04F6.7	E04F6.7	137.91	162.624	99.7309	237.511	305.047	239.572	0.0069111	0.96975	0.000457618	12.2809	1.9585	2.16045
WBGene00010808	sepa-1	M01E5.6	M01E5.6	29.7886	30.976	9.795	49.6436	30.7028	56.8634	1	0.969699	0.109856	2.55629	1.95843	NA
WBGene00022747		ZK470.6	ZK470.6	28.6854	13.2754	18.6995	23.3617	68.3384	27.0334	1	0.968978	0.140378	2.17381	1.95745	NA
WBGene00021939		Y55F3BR.2	Y55F3BR.2a	733.683	393.837	603.728	1151.54	968.622	1268.71	0.00157674	0.968853	6.18188e-05	16.0461	1.95728	2.80224
WBGene00013234	fbxb-24	Y56A3A.15	Y56A3A.15	26.4788	34.2948	22.2614	66.1915	60.4151	35.4231	1	0.967677	0.0496705	3.85255	1.95569	NA
WBGene00020565		T19C3.7	T19C3.7	12.1361	9.95656	6.23318	21.4149	16.837	16.7794	1	0.966995	0.191811	1.70365	1.95476	NA
WBGene00201640		C09G12.19	C09G12.19	1.10328	1.10628	2.67136	2.92021	3.96165	2.79656	1	0.966681	0.547028	0.362668	1.95434	NA
WBGene00006052	ssq-3	ZC477.1	ZC477.1	150.046	37.6137	37.3991	130.436	274.344	34.4909	0.402241	0.966272	0.171226	1.87218	1.95378	0.395514
WBGene00019311		K02E7.6	K02E7.6.1	99.2955	128.329	172.748	242.378	319.903	221.861	0.0131711	0.965959	0.00114416	10.5784	1.95336	1.88038
WBGene00011676	cyp-13A2	T10B9.7	T10B9.7	329.882	331.885	416.733	719.346	734.885	654.395	7.4461e-06	0.965231	7.80702e-08	28.8534	1.95238	5.12807
WBGene00044183		F09C6.13	F09C6.13	11.0328	17.7005	3.56182	15.5745	18.8178	27.9656	1	0.963343	0.237864	1.39321	1.94982	NA
WBGene00044446		C06G4.6	C06G4.6	19.8591	7.74399	9.795	13.6277	56.4534	2.79656	1	0.963157	0.347137	0.883895	1.94957	NA
WBGene00000027	abu-4	Y5H2A.3	Y5H2A.3	34.2018	4.42514	5.34273	13.6277	64.3767	7.4575	1	0.963139	0.359903	0.838231	1.94955	NA
WBGene00000986	dhs-23	R08H2.1	R08H2.1.2	12.1361	23.232	14.2473	23.3617	38.626	34.4909	1	0.962692	0.110241	2.55076	1.94894	NA
WBGene00022628		ZC513.3	ZC513.3	23.1689	13.2754	8.90455	18.4947	58.4343	11.1862	1	0.962545	0.23748	1.39549	1.94874	NA
WBGene00012041		T26E3.8	T26E3.8	6.6197	15.488	10.6855	17.5213	27.7315	18.6437	1	0.962351	0.18185	1.78244	1.94848	NA
WBGene00009957		F53B2.8	F53B2.8	276.924	191.387	203.024	478.915	435.781	392.451	0.000684088	0.962307	2.01381e-05	18.1762	1.94842	3.16489
WBGene00019958		R08E3.2	R08E3.2	675.209	531.016	986.624	1159.32	1375.68	1740.39	0.0030269	0.962247	0.000147939	14.3983	1.94834	2.519
WBGene00004780	ser-7	C09B7.1	C09B7.1c	127.981	138.286	146.925	312.463	239.68	253.555	0.00123953	0.962197	4.39868e-05	16.6911	1.94828	2.90674
WBGene00021505		Y41D4A.3	Y41D4A.3	36.4083	47.5702	32.0564	75.9255	67.348	82.0325	0.0756429	0.96173	0.0138661	6.05511	1.94764	1.12123
WBGene00077457		Y39B6A.49	Pseudogene:Y39B6A.49	493.167	389.412	390.019	880.931	590.285	1003.03	0.00136558	0.959896	4.97817e-05	16.4564	1.94517	2.86468
WBGene00008949		F19B6.3	F19B6.3	8.82626	4.42514	5.34273	8.76064	21.789	5.59312	1	0.959713	0.333397	0.935658	1.94492	NA
WBGene00019134		F59H6.3	F59H6.3	263.685	277.677	227.066	469.181	428.848	591.939	0.000292814	0.957011	6.80139e-06	20.2483	1.94128	3.53341
WBGene00016078		C24H12.9	Pseudogene:C24H12.9	4.41313	4.42514	1.78091	6.81383	9.90411	3.72875	1	0.956854	0.423425	0.640789	1.94107	NA
WBGene00003769	nlp-31	B0213.6	B0213.6	82.7462	64.1645	75.6886	122.649	176.293	133.303	0.0200329	0.956627	0.00209232	9.46673	1.94077	1.69826
WBGene00021207		Y18H1A.1	Y18H1A.1	78.3331	18.8068	10.6855	63.2713	125.782	19.5759	1	0.955798	0.239755	1.38203	1.93965	NA
WBGene00018083		F36A4.4	F36A4.4	65.0937	23.232	16.9186	56.4574	125.782	21.4403	1	0.955709	0.1873	1.73873	1.93953	NA
WBGene00202242		T23C6.6	T23C6.6	1.10328	3.31885	3.56182	3.89362	8.9137	2.79656	1	0.955373	0.484589	0.488518	1.93908	NA
WBGene00013409	fbxb-56	Y63D3A.10	Y63D3A.10	75.0232	56.4205	37.3991	91.5	138.658	96.0153	0.0856488	0.954834	0.0165923	5.73899	1.93836	1.06728
WBGene00018910		F56A4.2	F56A4.2	5695.15	6038.1	5622.33	11722.7	10195.3	11712.9	6.65125e-13	0.954455	1.18016e-15	64.1041	1.93785	12.1771
WBGene00021224	clec-209	Y19D10A.9	Y19D10A.9	5695.15	6038.1	5622.33	11722.7	10195.3	11712.9	6.65125e-13	0.954455	1.18016e-15	64.1041	1.93785	12.1771
WBGene00019667		K12B6.2	K12B6.2	19.8591	5.53142	7.12364	8.76064	47.5397	6.52531	1	0.952962	0.342985	0.899241	1.93584	NA
WBGene00016440	gipc-1	C35D10.2	C35D10.2	499.787	130.542	91.7168	411.75	829.965	155.675	0.578864	0.952908	0.322271	0.979708	1.93577	0.237423
WBGene00019530	scrm-8	K08D10.7	K08D10.7.1	29.7886	6.63771	6.23318	19.4681	53.4822	9.32187	1	0.952702	0.303456	1.05894	1.93549	NA
WBGene00012637		Y38H8A.3	Y38H8A.3	142.323	30.976	32.9468	111.941	245.622	41.0162	0.406161	0.952234	0.173995	1.84819	1.93487	0.391302
WBGene00019015		F57F4.1	F57F4.1	56.2674	23.232	16.0282	39.9096	126.773	17.7116	1	0.95168	0.212258	1.55596	1.93412	NA
WBGene00009893		F49E11.7	F49E11.7	11.0328	7.74399	2.67136	11.6809	26.7411	2.79656	1	0.950769	0.381875	0.764657	1.9329	NA
WBGene00015422		C04E6.5	C04E6.5	17.6525	21.0194	14.2473	20.4415	75.2713	6.52531	1	0.950693	0.268144	1.22621	1.9328	NA
WBGene00018237	drd-2	F40F4.6	F40F4.6	20755	12047.4	16374.6	30580.5	28451.5	35984.3	0.000164491	0.950196	3.2782e-06	21.6464	1.93214	3.78386
WBGene00006775	unc-39	F56A12.1	F56A12.1	12.1361	13.2754	22.2614	40.883	24.7603	27.0334	1	0.949825	0.121946	2.39214	1.93164	NA
WBGene00008255		C51E3.10	C51E3.10b	4.41313	4.42514	7.12364	9.73404	13.8658	7.4575	1	0.9497	0.323012	0.976711	1.93147	NA
WBGene00020318		T07F8.1	T07F8.1	2.20657	3.31885	15.1377	20.4415	7.92329	12.1184	1	0.948801	0.363516	0.82571	1.93027	NA
WBGene00015335	acdh-6	C02D5.1	C02D5.1	52.9576	34.2948	31.1659	47.6968	137.667	42.8806	0.270303	0.948116	0.0933492	2.81565	1.92935	0.568149
WBGene00020606	nhr-284	T20C7.2	T20C7.2	54.0609	44.2514	44.5227	108.048	86.1658	81.1003	0.0493768	0.947955	0.00761276	7.12238	1.92914	1.30648
WBGene00022441		Y110A2AL.4	Y110A2AL.4a	100.399	148.242	212.819	260.872	309.008	322.537	0.0193141	0.947848	0.00198583	9.56259	1.92899	1.71412
WBGene00044481		ZK185.5	ZK185.5	228.38	231.213	237.751	490.596	373.385	481.009	0.00014486	0.94754	2.75723e-06	21.9785	1.92858	3.83905
WBGene00008829	cyp-35D1	F14H3.10	F14H3.10	40.8215	77.4399	64.1127	116.809	130.734	104.405	0.0529852	0.947259	0.00838955	6.94837	1.92821	1.27585
WBGene00010999		R03G8.4	R03G8.4	9.92955	8.85027	8.01409	23.3617	19.8082	8.38968	1	0.945236	0.238611	1.38878	1.9255	NA
WBGene00010442	bus-12	JC8.12	JC8.12a	16.5492	27.6571	25.8232	40.883	62.3959	31.6944	1	0.943489	0.0789107	3.0872	1.92317	NA
WBGene00014129		ZK892.5	ZK892.5	38.6149	12.1691	13.3568	31.1489	72.3	19.5759	1	0.943105	0.196773	1.66617	1.92266	NA
WBGene00009449		F35H8.4	F35H8.4	25.3755	24.3383	12.4664	28.2287	72.3	18.6437	1	0.942938	0.170794	1.87596	1.92244	NA
WBGene00019888	btbd-10	R05F9.1	R05F9.1a	1045.91	632.795	533.382	1831.95	1375.68	1043.12	0.0117341	0.942901	0.00097287	10.8785	1.92239	1.93055
WBGene00008660	clec-153	F10F2.8	F10F2.8	34.2018	15.488	15.1377	38.9362	74.2808	11.1862	1	0.942453	0.21193	1.55819	1.92179	NA
WBGene00008243		C50H2.7	C50H2.7	3.30985	1.10628	2.67136	0.973404	9.90411	2.79656	1	0.942355	0.540411	0.374778	1.92166	NA
WBGene00020016	lipl-3	R11G11.14	R11G11.14	18.7558	19.9131	30.2755	37.9628	49.5206	45.6772	1	0.942099	0.0596019	3.54843	1.92132	NA
WBGene00077622		T25E12.14	T25E12.14	1.10328	6.63771	0.890455	2.92021	6.93288	6.52531	1	0.94125	0.50921	0.435689	1.92019	NA
WBGene00016327		C32E12.1	C32E12.1.2	104.812	17.7005	25.8232	74.9521	184.217	25.1691	0.469949	0.94045	0.224267	1.47686	1.91913	0.327949
WBGene00017948	mth-1	F31D5.5	F31D5.5	279.131	190.281	278.712	473.074	424.886	538.804	0.00116335	0.94037	4.00636e-05	16.8684	1.91902	2.93429
WBGene00016462		C35E7.10	C35E7.10a	83.8495	29.8697	24.0423	47.6968	189.169	27.0334	0.445881	0.93982	0.203	1.62066	1.91829	0.350781
WBGene00011184		R09H10.7	R09H10.7	45.2346	57.5268	62.3318	118.755	110.926	87.6256	0.0427942	0.939357	0.00622223	7.48479	1.91767	1.36861
WBGene00012199	mltn-3	W02B8.3	W02B8.3	109.225	43.1451	56.9891	104.154	180.255	116.523	0.128009	0.938984	0.0305285	4.67928	1.91718	0.892759
WBGene00011665		T09F5.1	T09F5.1	12.1361	11.0628	22.2614	14.6011	53.4822	19.5759	1	0.938422	0.209622	1.57403	1.91643	NA
WBGene00001960	hlh-16	DY3.3	DY3.3	12.1361	5.53142	7.12364	14.6011	18.8178	13.9828	1	0.937993	0.240685	1.37657	1.91586	NA
WBGene00008313		C54G4.3	C54G4.3	29.7886	12.1691	5.34273	15.5745	65.3671	9.32187	1	0.937838	0.314378	1.01219	1.91566	NA
WBGene00021157		Y4C6B.3	Y4C6B.3a	92.6758	152.667	119.321	227.777	230.766	239.572	0.0071718	0.937301	0.000485871	12.1691	1.91494	2.14437
WBGene00015692	ugt-25	C10H11.3	C10H11.3	252.652	313.078	226.175	554.84	554.63	405.501	0.00115003	0.937134	3.94195e-05	16.8991	1.91472	2.93929
WBGene00007717		C25D7.5	C25D7.5	180.938	152.667	115.759	366.973	240.67	250.758	0.0131731	0.936283	0.00114658	10.5745	1.91359	1.88031
WBGene00009047		F22B8.4	Pseudogene:F22B8.4	51.8543	30.976	42.7418	71.0585	87.1562	82.0325	0.0851954	0.935444	0.0164427	5.75491	1.91248	1.06958
WBGene00044514		R09E12.9	R09E12.9	12.1361	19.9131	9.795	31.1489	33.674	14.915	1	0.935349	0.173087	1.856	1.91235	NA
WBGene00013873		ZC376.1	ZC376.1	7.72298	13.2754	14.2473	18.4947	27.7315	21.4403	1	0.935325	0.168671	1.89472	1.91232	NA
WBGene00009022		F21F12.1	F21F12.1.2	9.92955	2.21257	3.56182	8.76064	9.90411	11.1862	1	0.934599	0.368605	0.80836	1.91136	NA
WBGene00022219		Y73B3A.18	Y73B3A.18b	1728.84	1268.91	1374.86	2478.29	2427.5	3447.23	0.000114136	0.934016	2.08039e-06	22.5193	1.91059	3.94258
WBGene00011699	cyp-34A2	T10H4.11	T10H4.11	70.6101	51.9954	51.6464	78.8457	144.6	109.066	0.0734169	0.933813	0.0133582	6.12104	1.91032	1.1342
WBGene00013318		Y57G11C.23	Y57G11C.23	30.8919	7.74399	15.1377	32.1223	58.4343	12.1184	1	0.933712	0.234316	1.41447	1.91018	NA
WBGene00000753	col-180	C44C10.1	C44C10.1	2445.98	581.905	468.379	1053.22	4909.47	714.055	0.637451	0.933387	0.385792	0.752165	1.90975	0.195553
WBGene00012777	lact-8	Y42A5A.2	Y42A5A.2c.1	147.84	129.435	117.54	195.654	354.567	203.217	0.0245485	0.933063	0.00279163	8.93889	1.90933	1.60997
WBGene00005544	sri-32	T10D4.12	T10D4.12	2.20657	4.42514	3.56182	10.7074	6.93288	1.86437	1	0.932938	0.460815	0.543913	1.90916	NA
WBGene00006009	srx-118	T21B4.12	T21B4.12	7.72298	4.42514	2.67136	11.6809	8.9137	7.4575	1	0.932253	0.362302	0.829898	1.90825	NA
WBGene00012138		T28F4.3	T28F4.3	58.474	25.4445	15.1377	47.6968	106.964	33.5587	1	0.930706	0.155086	2.0215	1.90621	NA
WBGene00196781		Y65B4BL.10	Y65B4BL.10	2.20657	5.53142	4.45227	11.6809	6.93288	4.66094	1	0.929539	0.407546	0.685948	1.90467	NA
WBGene00018505		F46F5.14	F46F5.14	3.30985	4.42514	3.56182	7.78723	11.8849	1.86437	1	0.929424	0.444985	0.583395	1.90451	NA
WBGene00013859		ZC247.1	ZC247.1	1200.37	366.18	927.854	1266.4	1400.44	2083.44	0.0575352	0.9292	0.00946159	6.73355	1.90422	1.24007
WBGene00017059		D2062.7	D2062.7	57.3707	24.3383	16.9186	57.4309	118.849	11.1862	1	0.929082	0.236858	1.3992	1.90406	NA
WBGene00004414	rpl-3	F13B10.2	F13B10.2b	1178.31	777.718	830.794	1930.26	1474.72	1898.87	0.000310174	0.928846	7.27967e-06	20.1183	1.90375	3.50839
WBGene00018547	clec-78	F47C12.2	F47C12.2	43.028	32.0822	68.565	43.8032	99.0411	131.438	0.225656	0.928499	0.0705584	3.26998	1.90329	0.646552
WBGene00022130		Y71F9B.9	Y71F9B.9a	168.802	128.329	113.088	265.739	246.612	266.606	0.00382224	0.928051	0.000203458	13.7989	1.9027	2.41768
WBGene00015414		C04C3.4	C04C3.4	28.6854	24.3383	18.6995	65.2181	30.7028	40.084	1	0.927553	0.0848095	2.97024	1.90205	NA
WBGene00010745	dod-17	K10D11.1	K10D11.1	217.347	286.528	267.136	518.824	575.429	372.875	0.00221531	0.927482	9.46914e-05	15.2397	1.90195	2.65456
WBGene00020167		T02G5.11	Pseudogene:T02G5.11a	73.92	45.3577	40.0705	136.277	81.2137	84.829	0.116805	0.927452	0.0263114	4.93543	1.90191	0.93254
WBGene00014138	clec-186	ZK896.7	ZK896.7	3256.89	2482.5	2775.55	5997.14	4800.52	5396.43	6.27296e-07	0.927451	4.14032e-09	34.5566	1.90191	6.20253
WBGene00015781		C14F11.6	C14F11.6.2	225.07	55.3142	104.183	135.303	431.819	164.065	0.257614	0.927436	0.0867856	2.93301	1.90189	0.58903
WBGene00015826	math-12	C16C4.2	Pseudogene:C16C4.2	2.20657	8.85027	6.23318	9.73404	13.8658	9.32187	1	0.926531	0.343475	0.897416	1.9007	NA
WBGene00019412	fbxb-49	K05F6.1	K05F6.1	22.0657	56.4205	16.9186	59.3777	80.2233	41.0162	1	0.926376	0.11348	2.50507	1.9005	NA
WBGene00016322		C32E8.4	C32E8.4.2	65.0937	15.488	16.9186	53.5372	108.945	22.3725	1	0.925886	0.211365	1.56205	1.89985	NA
WBGene00001947	his-73	W09H1.2	W09H1.2	12.1361	13.2754	6.23318	21.4149	15.8466	22.3725	1	0.925027	0.202344	1.62537	1.89872	NA
WBGene00044163		F49C5.11	F49C5.11a	76.1265	24.3383	8.01409	36.016	155.495	13.9828	1	0.924756	0.307624	1.04085	1.89836	NA
WBGene00015992		C18H2.5	C18H2.5	36.4083	8.85027	11.5759	29.2021	65.3671	13.0506	1	0.924247	0.254961	1.29591	1.89769	NA
WBGene00013404	fbxb-101	Y63D3A.3	Y63D3A.3	2.20657	3.31885	3.56182	3.89362	5.94247	7.4575	1	0.924185	0.452165	0.565219	1.89761	NA
WBGene00007509		C10C5.5	C10C5.5	174.319	213.513	113.978	364.053	307.028	278.724	0.0137209	0.923722	0.00121617	10.4656	1.897	1.86262
WBGene00011229		R11.4	R11.4	31.9952	51.9954	30.2755	93.4468	75.2713	47.5415	1	0.923267	0.0467174	3.95554	1.89641	NA
WBGene00012886		Y45F10D.6	Y45F10D.6	39.7182	21.0194	31.1659	56.4574	68.3384	49.4059	1	0.921581	0.0454386	4.00229	1.89419	NA
WBGene00018690	fbxa-46	F52D2.8	F52D2.8a	3.30985	7.74399	5.34273	10.7074	12.8753	7.4575	1	0.92032	0.340917	0.906978	1.89254	NA
WBGene00015121		B0302.4	B0302.4	1.10328	2.21257	1.78091	0.973404	4.95206	3.72875	1	0.920073	0.57657	0.311813	1.89221	NA
WBGene00001537	gcy-11	C30G4.3	C30G4.3	137.91	67.4833	107.745	194.681	189.169	208.81	0.0300596	0.920015	0.0037448	8.40359	1.89214	1.52202
WBGene00044361		K09F6.11	K09F6.11	6.6197	5.53142	11.5759	15.5745	12.8753	16.7794	1	0.919195	0.256766	1.28611	1.89106	NA
WBGene00044202		K10G4.10	K10G4.10	7.72298	6.63771	7.12364	11.6809	16.837	12.1184	1	0.918937	0.264849	1.24323	1.89072	NA
WBGene00014888		Y43F8B.8	Pseudogene:Y43F8B.8	1.10328	3.31885	2.67136	4.86702	2.97123	5.59312	1	0.918743	0.510401	0.433245	1.89047	NA
WBGene00021436		Y39A3B.1	Y39A3B.1	9.92955	4.42514	8.01409	8.76064	15.8466	17.7116	1	0.918415	0.285355	1.14141	1.89004	NA
WBGene00010706	cyp-14A2	K09A11.3	K09A11.3	95.9856	87.3964	98.8405	170.346	189.169	174.319	0.00505185	0.918271	0.000295802	13.0968	1.88985	2.29655
WBGene00003847	blmp-1	F25D7.3	F25D7.3b	951.03	577.48	856.617	1385.15	1634.18	1488.7	0.000396024	0.918074	9.94042e-06	19.5228	1.88959	3.40228
WBGene00086560		ZK355.8	ZK355.8	2.20657	1.10628	2.67136	0.973404	1.98082	8.38968	1	0.918065	0.572087	0.319202	1.88958	NA
WBGene00045060		F55B11.7	F55B11.7a	15.446	8.85027	9.795	21.4149	32.6836	10.2541	1	0.917673	0.230136	1.44002	1.88907	NA
WBGene00012741		Y40H4A.2	Y40H4A.2	18.7558	7.74399	9.795	21.4149	39.6165	7.4575	1	0.917378	0.274644	1.1934	1.88868	NA
WBGene00009457		F36A2.10	F36A2.10.1	188.661	43.1451	37.3991	140.17	328.817	39.1519	0.63534	0.917179	0.383221	0.760344	1.88842	0.196994
WBGene00016752		C48E7.7	C48E7.7	571.501	148.242	145.144	454.58	959.709	218.132	0.544264	0.916697	0.288747	1.12546	1.88779	0.26419
WBGene00004236	ptr-22	Y80D3A.7	Y80D3A.7b	12.1361	14.3817	33.8373	25.3085	48.5302	41.0162	1	0.916499	0.146598	2.10729	1.88753	NA
WBGene00000968	dhs-4	T05F1.10	T05F1.10	93.779	123.904	87.2646	208.309	207.986	158.472	0.0144754	0.916465	0.00130756	10.3318	1.88748	1.83937
WBGene00050956		C14A6.13	C14A6.13	40.8215	25.4445	19.59	38.9362	107.955	14.915	1	0.916099	0.205186	1.60507	1.88701	NA
WBGene00022288		Y75B7B.1	Y75B7B.1	27.5821	11.0628	11.5759	25.3085	51.5014	17.7116	1	0.916083	0.199069	1.6492	1.88698	NA
WBGene00023320		K07E8.4	Pseudogene:K07E8.4	1.10328	2.21257	1.78091	2.92021	2.97123	3.72875	1	0.915813	0.561114	0.33778	1.88663	NA
WBGene00000652	col-76	M110.1	M110.1	813.119	406.006	537.835	929.601	1295.46	1088.79	0.0071718	0.915672	0.000484136	12.1758	1.88645	2.14437
WBGene00022032		Y65B4A.9	Y65B4A.9a	62.8871	14.3817	14.2473	41.8564	107.955	22.3725	1	0.915163	0.236062	1.40396	1.88578	NA
WBGene00235272		Y43B11AL.5	Pseudogene:Y43B11AL.5	7.72298	3.31885	5.34273	9.73404	10.8945	10.2541	1	0.914823	0.336366	0.924233	1.88534	NA
00_NOT_FOUND_R153.1f			R153.1f	1.10328	2.21257	1.78091	3.89362	1.98082	3.72875	1	0.913747	0.565771	0.32981	1.88393	NA
WBGene00006950	wrt-4	ZK678.5	ZK678.5	884.833	185.856	243.094	350.426	1815.42	307.622	0.631801	0.912913	0.378143	0.776731	1.88284	0.19942
WBGene00016506	abhd-5.1	C37H5.2	C37H5.2	101.502	110.628	96.1691	166.452	206.006	206.946	0.00617116	0.911663	0.000390208	12.5785	1.88121	2.20963
WBGene00015631	clec-89	C09D1.2	C09D1.2	12.1361	24.3383	18.6995	35.0426	44.5685	24.2369	1	0.911128	0.122799	2.38125	1.88052	NA
WBGene00004084	pph-2	C29E6.3	C29E6.3	28.6854	4.42514	9.795	15.5745	59.4247	5.59312	1	0.911119	0.36435	0.822845	1.8805	NA
WBGene00009229		F28G4.4	F28G4.4	14.3427	8.85027	9.795	18.4947	24.7603	18.6437	1	0.910203	0.187711	1.73549	1.87931	NA
WBGene00019549		K09C4.4	K09C4.4	2.20657	3.31885	11.5759	7.78723	9.90411	14.915	1	0.910035	0.386134	0.751083	1.87909	NA
WBGene00017366		F10G2.7	F10G2.7	6.6197	8.85027	1.78091	5.84043	18.8178	7.4575	1	0.909801	0.398735	0.712137	1.87879	NA
WBGene00014173		ZK970.7	ZK970.7	55.1641	128.329	79.2505	108.048	193.13	192.031	0.109269	0.909657	0.0238648	5.10443	1.8786	0.961504
WBGene00006820	unc-89	C09D1.1	C09D1.1e	2405.16	1316.48	1998.18	2781.02	2822.67	5133.55	0.0139176	0.908585	0.00123921	10.4309	1.8772	1.85644
WBGene00044121	gcp-2.3	C35C5.11	C35C5.11	20.9624	18.8068	8.01409	24.3351	38.626	26.1012	1	0.908109	0.162108	1.95446	1.87658	NA
WBGene00012744		Y40H7A.4	Y40H7A.4b	9.92955	2.21257	20.4805	20.4415	22.7795	18.6437	1	0.907894	0.291952	1.1106	1.8763	NA
WBGene00017672		F21F3.2	F21F3.2	34.2018	13.2754	7.12364	22.3883	71.3096	8.38968	1	0.907417	0.312677	1.01933	1.87568	NA
WBGene00018746	fbxb-103	F53C3.2	F53C3.2	28.6854	51.9954	38.2896	79.8191	89.137	54.0669	0.147082	0.90657	0.0375636	4.32467	1.87458	0.83244
WBGene00019406	acdh-8	K05F1.3	K05F1.3	155.563	56.4205	48.0846	122.649	332.778	31.6944	0.434067	0.906454	0.193315	1.69217	1.87443	0.362443
WBGene00021358		Y37E11AL.2	Y37E11AL.2a	56.2674	25.4445	29.385	51.5904	103.003	53.1347	1	0.905064	0.0801734	3.06138	1.87263	NA
WBGene00015040	cyp-34A5	B0213.10	B0213.10	38.6149	43.1451	40.9609	69.1117	85.1754	75.5072	0.0757159	0.904775	0.0138864	6.05252	1.87225	1.12081
WBGene00018310		F41G4.7	F41G4.7	45.2346	33.1885	40.0705	65.2181	80.2233	76.4393	0.0912083	0.90458	0.0181843	5.57831	1.872	1.03997
WBGene00014170		ZK945.8	ZK945.8	5.51641	2.21257	1.78091	1.94681	14.8562	0.932187	1	0.904349	0.547684	0.361482	1.8717	NA
WBGene00023345		T12B5.9	Pseudogene:T12B5.9	9.92955	17.7005	9.795	21.4149	30.7028	17.7116	1	0.90401	0.186883	1.74202	1.87126	NA
WBGene00012010		T25B9.4	T25B9.4	26.4788	11.0628	9.795	10.7074	69.3288	8.38968	1	0.90396	0.332966	0.937326	1.8712	NA
WBGene00012025	clec-38	T25E12.10	T25E12.10	5.51641	2.21257	2.67136	3.89362	9.90411	5.59312	1	0.903663	0.456205	0.55519	1.87081	NA
WBGene00003482	mua-3	K08E5.3	K08E5.3a	2218.7	1046.54	1604.6	2463.69	3516.95	3127.49	0.00724869	0.903282	0.000492662	12.1432	1.87032	2.13974
WBGene00003435	msp-40	C33F10.9	C33F10.9	1044.81	292.059	204.805	854.649	1759.96	268.47	0.612164	0.903259	0.357207	0.847689	1.87029	0.213132
WBGene00020472	lips-11	T13B5.5	T13B5.5	5.51641	1.10628	1.78091	4.86702	8.9137	1.86437	1	0.90267	0.525908	0.402292	1.86952	NA
WBGene00019931		R07C12.1	R07C12.1	14.3427	7.74399	10.6855	13.6277	33.674	13.9828	1	0.902018	0.241345	1.37272	1.86868	NA
WBGene00011175		R09E10.5	R09E10.5	20.9624	8.85027	21.3709	11.6809	53.4822	30.7622	1	0.901904	0.225474	1.46919	1.86853	NA
WBGene00004819	skr-13	C52D10.8	C52D10.8	77.2298	177.005	73.0173	270.606	217.89	122.117	0.148691	0.901881	0.0381973	4.29621	1.8685	0.827714
WBGene00016451	clec-6	C35D10.15	C35D10.15	20.9624	15.488	19.59	39.9096	41.5973	23.3047	1	0.900988	0.10999	2.55437	1.86734	NA
WBGene00016891		C53A3.1	C53A3.1	13.2394	39.8262	18.6995	51.5904	46.5493	35.4231	1	0.899666	0.121216	2.40154	1.86563	NA
WBGene00020194		T03G6.1	T03G6.1	222.863	70.8022	165.625	189.814	440.733	226.521	0.159151	0.899364	0.0423566	4.1209	1.86524	0.798191
WBGene00014883		Y39C12A.2	Pseudogene:Y39C12A.2	407.111	378.349	384.676	717.399	644.758	819.393	1.52924e-05	0.89907	1.73903e-07	27.3034	1.86486	4.81553
WBGene00018913		F56A4.5	F56A4.5	2.20657	1.10628	0.890455	0.973404	4.95206	1.86437	1	0.898502	0.620137	0.245676	1.86413	NA
WBGene00195067		C04C3.9	C04C3.9	1.10328	2.21257	0.890455	0.973404	4.95206	1.86437	1	0.897793	0.620419	0.245278	1.86321	NA
WBGene00007672	fbxa-136	C18D4.2	C18D4.2a	8.82626	13.2754	15.1377	21.4149	8.9137	39.1519	1	0.897749	0.251024	1.31759	1.86316	NA
WBGene00009099		F25B3.2	F25B3.2	2.20657	2.21257	8.01409	2.92021	16.837	3.72875	1	0.896791	0.484806	0.488034	1.86192	NA
WBGene00015950		C18A11.4	C18A11.4	28.6854	59.7393	17.8091	71.0585	61.4055	64.3209	1	0.89668	0.0883485	2.90421	1.86178	NA
WBGene00021519		Y41D4B.17	Y41D4B.17	76.1265	60.8456	72.1268	113.888	136.677	138.896	0.0248567	0.896617	0.00284271	8.90577	1.8617	1.60456
WBGene00022344		Y82E9BR.11	Y82E9BR.11	2.20657	1.10628	0.890455	1.94681	3.96165	1.86437	1	0.896416	0.610172	0.259925	1.86144	NA
WBGene00016726		C46H3.3	C46H3.3	4.41313	6.63771	3.56182	8.76064	9.90411	8.38968	1	0.896015	0.368436	0.808932	1.86092	NA
WBGene00000930	dao-4	ZC373.6	ZC373.6	255.962	108.416	50.7559	84.6862	627.921	59.66	0.679969	0.895907	0.439135	0.598542	1.86078	0.167511
WBGene00019562		K09C6.8	K09C6.8	26.4788	1.10628	3.56182	13.6277	36.6452	7.4575	1	0.895825	0.435582	0.607894	1.86067	NA
WBGene00007380		C06C6.6	C06C6.6	7.72298	1.10628	1.78091	1.94681	15.8466	1.86437	1	0.895814	0.545241	0.365912	1.86066	NA
WBGene00015574	irg-1	C07G3.2	C07G3.2	25.3755	25.4445	10.6855	25.3085	64.3767	24.2369	1	0.895576	0.179959	1.79796	1.86035	NA
WBGene00021226		Y19D10A.11	Y19D10A.11	63.9904	64.1645	79.2505	123.622	88.1466	174.319	0.0773084	0.89507	0.014246	6.0074	1.8597	1.11177
WBGene00202394		T10B9.13	T10B9.13	3.30985	6.63771	6.23318	15.5745	10.8945	3.72875	1	0.89483	0.391209	0.735181	1.85939	NA
WBGene00009867		F49C5.4	F49C5.4	11.0328	14.3817	18.6995	23.3617	18.8178	40.084	1	0.894583	0.170529	1.87829	1.85907	NA
WBGene00000425	ced-11	ZK512.3	ZK512.3	176.525	107.31	178.981	287.154	272.363	302.029	0.0102531	0.894498	0.000801298	11.2382	1.85896	1.98914
WBGene00043997		Y79H2A.12	Y79H2A.12	12.1361	6.63771	5.34273	9.73404	20.7986	13.9828	1	0.891596	0.294233	1.10015	1.85523	NA
WBGene00019054		F58F6.6	F58F6.6	1.10328	2.21257	0.890455	3.89362	1.98082	1.86437	1	0.890587	0.612488	0.256567	1.85393	NA
WBGene00219766	anr-42	Y71G12B.39	Y71G12B.39	23.1689	17.7005	9.795	36.016	22.7795	34.4909	1	0.890232	0.151422	2.05787	1.85347	NA
WBGene00005759	srw-12	C41G6.2	C41G6.2	1.10328	2.21257	8.90455	4.86702	7.92329	10.2541	1	0.890222	0.46902	0.524285	1.85346	NA
WBGene00017133		EEED8.2	EEED8.2	40.8215	107.31	73.0173	154.771	150.543	104.405	0.125909	0.889451	0.0296298	4.73064	1.85247	0.899944
WBGene00006952	wrt-6	ZK377.1	ZK377.1	556.055	140.498	138.911	198.574	1155.81	192.031	0.643977	0.88846	0.394215	0.7259	1.8512	0.191129
WBGene00001424	fis-1	F41G3.4	F41G3.4	23.1689	2.21257	1.78091	14.6011	31.6932	3.72875	1	0.888206	0.461371	0.542565	1.85087	NA
WBGene00019028	srb-13	F58A6.11	F58A6.11	2.20657	1.10628	0.890455	1.94681	2.97123	2.79656	1	0.887727	0.61063	0.259258	1.85026	NA
WBGene00018627		F49D11.3	F49D11.3a	14.3427	6.63771	4.45227	24.3351	17.8274	4.66094	1	0.887485	0.354899	0.855863	1.84995	NA
WBGene00014701		C43D7.1	Pseudogene:C43D7.1	7.72298	5.53142	4.45227	12.6543	5.94247	13.9828	1	0.887385	0.351254	0.868922	1.84982	NA
WBGene00011607		T08D2.2	T08D2.2	131.291	122.798	134.459	206.362	179.264	332.791	0.0292656	0.886915	0.00356562	8.49276	1.84922	1.53364
WBGene00000412	cdr-1	F35E8.11	F35E8.11	656.453	659.345	815.656	1118.44	1099.36	1723.61	0.00148611	0.886423	5.6213e-05	16.2261	1.84859	2.82795
WBGene00009257		F29G6.1	F29G6.1	68.4035	48.6765	49.8655	77.8723	147.571	82.9647	0.123769	0.886388	0.0288286	4.77782	1.84854	0.907386
WBGene00013175		Y53F4B.36	Y53F4B.36	8.82626	7.74399	6.23318	7.78723	28.7219	5.59312	1	0.885851	0.3622	0.83025	1.84785	NA
WBGene00013031		Y49E10.7	Pseudogene:Y49E10.7	9.92955	19.9131	16.9186	29.2021	22.7795	34.4909	1	0.885798	0.149705	2.07525	1.84779	NA
WBGene00009467		F36D1.8	F36D1.8	6.6197	3.31885	5.34273	4.86702	17.8274	5.59312	1	0.8851	0.413063	0.669966	1.84689	NA
WBGene00010234	ttr-50	F58B3.9	F58B3.9	513.027	583.012	459.475	1159.32	920.092	790.495	0.000436274	0.884283	1.12244e-05	19.2908	1.84585	3.36024
WBGene00011599		T07G12.8	T07G12.8	441.313	298.697	327.687	639.527	589.295	740.157	0.00106402	0.883777	3.53967e-05	17.1035	1.8452	2.97305
WBGene00009681	gipc-2	F44D12.4	F44D12.4	644.317	226.788	143.363	544.133	1188.49	137.964	0.619397	0.882974	0.365174	0.820022	1.84417	0.208031
WBGene00044349		Y71G12B.32	Y71G12B.32	5.51641	7.74399	7.12364	12.6543	11.8849	13.0506	1	0.88181	0.295869	1.09272	1.84269	NA
WBGene00016541		C39H7.1	C39H7.1.2	263.685	89.609	57.8796	215.122	482.33	59.66	0.623067	0.881259	0.368909	0.807337	1.84198	0.205465
WBGene00008267		C53A5.9	C53A5.9	1.10328	2.21257	0.890455	3.89362	0.990411	2.79656	1	0.881245	0.622644	0.242169	1.84196	NA
WBGene00008511		F01G10.9	F01G10.9	387.252	217.938	172.748	399.096	697.25	334.655	0.0812748	0.880467	0.0152992	5.88168	1.84097	1.09004
WBGene00001954	hlh-10	ZK682.4	ZK682.4	2.20657	9.95656	7.12364	13.6277	7.92329	13.9828	1	0.880124	0.361372	0.83312	1.84053	NA
WBGene00013152		Y53F4B.5	Y53F4B.5	2.20657	5.53142	4.45227	8.76064	11.8849	1.86437	1	0.880113	0.468801	0.524801	1.84052	NA
WBGene00021872	clec-85	Y54G2A.6	Y54G2A.6a	1393.45	1372.9	1380.2	2710.93	2103.63	2813.34	1.97928e-06	0.879463	1.62825e-08	31.8939	1.83969	5.70349
WBGene00077443		Y71A12B.19	Pseudogene:Y71A12B.19	41.9247	14.3817	10.6855	50.617	19.8082	52.2025	1	0.879455	0.213855	1.54514	1.83968	NA
WBGene00008292		C54C8.4	C54C8.4	5.51641	6.63771	13.3568	14.6011	18.8178	13.9828	1	0.87942	0.276766	1.1829	1.83964	NA
WBGene00021623		Y47D7A.11	Y47D7A.11	3.30985	3.31885	0.890455	5.84043	6.93288	0.932187	1	0.879204	0.558412	0.342462	1.83936	NA
WBGene00015802	kynu-1	C15H9.7	C15H9.7	3596.7	4239.28	3074.74	7116.56	6593.17	6352.86	1.54178e-06	0.879014	1.18129e-08	32.5174	1.83912	5.81198
WBGene00006759	unc-22	ZK617.1	ZK617.1i.1	4750.74	2506.84	3983.89	5380.01	5047.14	10245.7	0.0256171	0.878902	0.002971	8.82519	1.83898	1.59147
WBGene00022497		Y119D3B.21	Y119D3B.21	7769.32	8138.93	5503.01	13085.5	14796.7	11486.4	9.65777e-05	0.878804	1.67467e-06	22.9362	1.83885	4.01512
WBGene00022891		ZK1290.10	ZK1290.10	37.5116	18.8068	17.8091	44.7766	40.6069	50.3381	1	0.878522	0.0954258	2.78038	1.83849	NA
WBGene00189944		E03A3.10	Pseudogene:E03A3.1	29.7886	6.63771	6.23318	13.6277	50.511	13.9828	1	0.878406	0.333775	0.934194	1.83834	NA
WBGene00004224	ptr-10	F55F8.1	F55F8.1.2	57.3707	23.232	74.7982	72.0319	131.725	82.9647	0.237915	0.878352	0.0767146	3.13317	1.83827	0.623578
WBGene00007415		C07E3.4	C07E3.4	35.3051	1.10628	13.3568	10.7074	73.2904	7.4575	1	0.878098	0.435491	0.608134	1.83795	NA
WBGene00017138		EEED8.10	EEED8.10b	368.496	421.494	624.209	850.755	685.365	1065.49	0.0080833	0.878061	0.000567181	11.8807	1.8379	2.09241
WBGene00017334		F10D2.8	F10D2.8	6.6197	14.3817	8.01409	17.5213	19.8082	15.8472	1	0.877964	0.24394	1.35768	1.83778	NA
WBGene00001650	gon-1	F25H8.3	F25H8.3c	183.145	179.218	505.778	402.989	486.292	708.462	0.121436	0.877821	0.0277757	4.84193	1.8376	0.915654
WBGene00007552		C13C12.2	C13C12.2	86.0561	45.3577	54.3177	62.2979	189.169	89.49	0.232848	0.876989	0.0744611	3.18183	1.83654	0.632927
WBGene00007461		C08F11.14	Pseudogene:C08F11.14	20.9624	6.63771	3.56182	9.73404	41.5973	5.59312	1	0.875718	0.403676	0.697349	1.83492	NA
WBGene00012664		Y39B6A.1	Y39B6A.1	24328.5	14003.3	21433.2	35564.3	35103.1	38966.4	0.000466924	0.875305	1.24272e-05	19.0965	1.8344	3.33075
WBGene00011493		T05F1.8	T05F1.8	102.605	32.0822	29.385	80.7926	183.226	36.3553	0.423064	0.874525	0.185856	1.75017	1.8334	0.373594
WBGene00013510		Y71A12B.13	Pseudogene:Y71A12B.13a	25.3755	16.5943	36.5086	29.2021	59.4247	55.9312	1	0.874484	0.112839	2.514	1.83335	NA
WBGene00016227	nhr-280	C29F9.13	C29F9.13	1.10328	3.31885	0.890455	1.94681	3.96165	3.72875	1	0.87436	0.591237	0.288416	1.8332	NA
WBGene00001691	grd-2	F46B3.5	F46B3.5	95.9856	21.0194	26.7136	37.9628	183.226	41.9484	0.489361	0.874356	0.238719	1.38814	1.83319	0.310371
WBGene00009938		F52F12.5	F52F12.5	46.3379	15.488	14.2473	41.8564	85.1754	12.1184	1	0.874054	0.26429	1.24614	1.83281	NA
WBGene00016594		C42D4.1	C42D4.1	6274.37	9033.92	6272.36	13784.4	13319.1	12441	3.36848e-05	0.873819	4.56411e-07	25.4398	1.83251	4.47257
WBGene00013651		Y105C5B.11	Y105C5B.11a	14.3427	6.63771	2.67136	3.89362	32.6836	6.52531	1	0.873513	0.436347	0.60587	1.83212	NA
WBGene00010175		F56H11.2	F56H11.3a	55.1641	7.74399	10.6855	17.5213	103.993	13.0506	1	0.87332	0.36135	0.833196	1.83187	NA
WBGene00017872		F28A10.4	F28A10.4	6.6197	5.53142	1.78091	6.81383	12.8753	5.59312	1	0.873287	0.430402	0.621739	1.83183	NA
WBGene00009311	mltn-1	F32A11.7	F32A11.7	211.83	87.3964	105.074	210.255	318.912	210.674	0.0990523	0.873176	0.0204675	5.37157	1.83169	1.00414
WBGene00020630		T20F7.1	T20F7.1	1346.01	1331.97	1413.15	2259.27	2132.36	3100.45	5.535e-05	0.872856	8.23326e-07	24.3025	1.83128	4.25688
WBGene00195246		ZK546.19	ZK546.19	8.82626	1.10628	1.78091	5.84043	8.9137	6.52531	1	0.872808	0.488888	0.478972	1.83122	NA
WBGene00002051	ifa-3	F52E10.5	F52E10.5	11.0328	8.85027	24.9327	34.0691	19.8082	28.8978	1	0.872501	0.20301	1.62059	1.83083	NA
WBGene00020386	cyp-34A4	T09H2.1	T09H2.1	255.962	247.808	263.575	539.266	377.347	488.466	0.000997372	0.872492	3.21759e-05	17.2847	1.83082	3.00114
WBGene00018752		F53C3.8	F53C3.8	6.6197	3.31885	15.1377	14.6011	18.8178	13.0506	1	0.872181	0.31964	0.990419	1.83043	NA
WBGene00009695		F44F1.3	F44F1.3	31.9952	9.95656	6.23318	20.4415	51.5014	15.8472	1	0.872113	0.294587	1.09854	1.83034	NA
WBGene00010486		K01H12.4	K01H12.4	123.568	23.232	30.2755	80.7926	211.948	30.7622	0.493552	0.870984	0.2427	1.36484	1.82891	0.306667
WBGene00015765		C14C11.1	C14C11.1	111.432	69.6959	52.5368	144.064	227.795	54.999	0.267722	0.870893	0.0920692	2.83782	1.8288	0.572316
WBGene00004818	skr-12	C52D10.6	C52D10.6.1	121.361	227.895	93.4977	291.048	329.807	187.37	0.100314	0.870502	0.0209381	5.33194	1.8283	0.99864
WBGene00022567		ZC239.4	ZC239.4	2.20657	6.63771	6.23318	6.81383	4.95206	15.8472	1	0.870007	0.422941	0.642129	1.82767	NA
WBGene00010650		K08C9.1	K08C9.1	84.9528	13.2754	16.9186	51.5904	143.61	14.915	1	0.869821	0.311046	1.02623	1.82744	NA
WBGene00000677	col-103	F56B3.1	F56B3.1	28473.5	14939.3	12954.3	38285	33625.5	31080.1	0.0118217	0.869618	0.000984835	10.8559	1.82718	1.92732
WBGene00045050		ZC15.10	ZC15.10	24.2722	24.3383	26.7136	44.7766	43.5781	49.4059	1	0.869611	0.0569907	3.62286	1.82717	NA
WBGene00022845		ZK1055.4	ZK1055.4	6.6197	7.74399	13.3568	14.6011	16.837	19.5759	1	0.869226	0.254883	1.29634	1.82668	NA
WBGene00010147		F56D5.2	F56D5.2	18.7558	6.63771	2.67136	4.86702	39.6165	6.52531	1	0.86903	0.437323	0.603298	1.82643	NA
WBGene00009438		F35G2.5	F35G2.5a	27.5821	12.1691	11.5759	11.6809	60.4151	21.4403	1	0.868983	0.271746	1.20791	1.82637	NA
WBGene00004130	ketn-1	F54E2.3	F54E2.3e	6370.36	3110.87	4875.24	6595.79	6718.95	12903.3	0.0306705	0.868874	0.00384401	8.35607	1.82624	1.51328
WBGene00015034		B0207.11	B0207.11	26.4788	4.42514	6.23318	21.4149	40.6069	5.59312	1	0.868792	0.378774	0.774679	1.82613	NA
WBGene00219764	anr-47	Y67D8B.6	Y67D8B.6	6.6197	1.10628	3.56182	5.84043	13.8658	0.932187	1	0.868573	0.532016	0.39054	1.82586	NA
WBGene00020911	cpt-6	W01A11.5	W01A11.5	552.745	394.943	422.076	849.782	876.514	772.783	0.000198649	0.868023	4.11749e-06	21.2094	1.82516	3.70191
WBGene00003018	lin-32	T14F9.5	T14F9.5	7.72298	14.3817	27.6041	37.9628	21.789	31.6944	1	0.86783	0.201491	1.63153	1.82492	NA
WBGene00011103		R07E3.2	R07E3.2	25.3755	15.488	20.4805	20.4415	67.348	24.2369	1	0.867568	0.190831	1.71119	1.82458	NA
WBGene00021468	epg-2	Y39G10AR.10	Y39G10AR.10	255.962	292.059	299.193	544.133	525.908	476.348	8.03326e-05	0.867054	1.33467e-06	23.3726	1.82394	4.09511
WBGene00015879		C17B7.5	C17B7.5	51.8543	53.1016	43.6323	89.5532	97.0603	83.8968	0.0644602	0.866936	0.0111329	6.44398	1.82378	1.19071
WBGene00012595		Y38E10A.17	Y38E10A.17	255.962	48.6765	42.7418	165.479	407.059	60.5922	0.659862	0.866551	0.413135	0.669761	1.8233	0.180547
WBGene00013975		ZK455.5	ZK455.5	101.502	107.31	96.1691	172.293	192.14	191.098	0.00708988	0.866399	0.000473459	12.2174	1.82311	2.14936
WBGene00013801		Y116A8C.24	Y116A8C.24a	33.0985	9.95656	7.12364	15.5745	65.3671	10.2541	1	0.866384	0.343843	0.896049	1.82309	NA
WBGene00008713		F11E6.10	F11E6.10	8.82626	13.2754	14.2473	15.5745	24.7603	26.1012	1	0.866182	0.202092	1.62719	1.82283	NA
WBGene00007472	chil-7	C08H9.13	C08H9.13	20.9624	13.2754	21.3709	49.6436	27.7315	24.2369	1	0.865956	0.148831	2.08419	1.82255	NA
WBGene00020550		T17H7.1	T17H7.1.2	707.204	317.504	361.525	746.601	1078.56	700.073	0.0409835	0.865821	0.00585053	7.59577	1.82238	1.38739
WBGene00020659		T21G5.1	T21G5.1	45.2346	7.74399	5.34273	19.4681	75.2713	11.1862	1	0.865529	0.374454	0.788829	1.82201	NA
WBGene00011313		T01B7.8	T01B7.8	3.30985	3.31885	7.12364	4.86702	14.8562	5.59312	1	0.865324	0.436606	0.605187	1.82175	NA
WBGene00000667	col-92	W05B2.6	W05B2.6	11370.4	2476.97	2744.38	7247.97	18914.9	4052.22	0.627653	0.864815	0.374059	0.790136	1.82111	0.20228
WBGene00001147	eat-18	Y105E8A.7	Y105E8A.7c	15.446	21.0194	28.4945	22.3883	53.4822	42.8806	1	0.864332	0.139852	2.17959	1.8205	NA
WBGene00236785		Y73B6A.16	Y73B6A.16	65.0937	55.3142	76.5791	115.835	114.888	128.642	0.0393026	0.863951	0.00548645	7.71169	1.82002	1.40558
WBGene00185006		F59B2.15	F59B2.15	12.1361	1.10628	0.890455	4.86702	18.8178	1.86437	1	0.863689	0.550237	0.356892	1.81969	NA
WBGene00013052	scrm-7	Y50E8A.9	Y50E8A.9a	14.3427	6.63771	4.45227	15.5745	27.7315	2.79656	1	0.863484	0.402876	0.699727	1.81943	NA
WBGene00009641		F42G4.2	F42G4.2	131.291	32.0822	34.7277	79.8191	212.938	67.1175	0.402625	0.86335	0.171584	1.86905	1.81926	0.395099
WBGene00077603		T05G11.9	Pseudogene:T05G11.9	3.30985	2.21257	4.45227	2.92021	6.93288	8.38968	1	0.862809	0.481791	0.494807	1.81858	NA
WBGene00008465		E03A3.5	Pseudogene:E03A3.5	7.72298	4.42514	1.78091	12.6543	4.95206	7.4575	1	0.862331	0.442931	0.588678	1.81797	NA
WBGene00001104	dsl-2	W09G12.1	W09G12.1	79.4364	142.711	82.8123	223.883	203.034	126.777	0.0867114	0.862089	0.0169427	5.7023	1.81767	1.06192
WBGene00016025	xbx-4	C23H5.3	C23H5.3	18.7558	15.488	28.4945	41.8564	33.674	39.1519	1	0.862066	0.105871	2.6148	1.81764	NA
WBGene00010547		K03H1.12	K03H1.12	46.3379	13.2754	16.0282	29.2021	94.0891	13.9828	1	0.861849	0.282669	1.15422	1.81737	NA
WBGene00044805		Y53C10A.15	Y53C10A.15	1.10328	2.21257	3.56182	2.92021	6.93288	2.79656	1	0.861829	0.552733	0.352444	1.81734	NA
WBGene00044156		Y66C5A.1	Y66C5A.1	52.9576	46.4639	26.7136	76.8989	82.2041	68.9819	0.152051	0.861274	0.0394997	4.23925	1.81664	0.818011
WBGene00006820	unc-89	C09D1.1	C09D1.1d	1720.02	841.882	1329.45	2170.69	2268.04	2620.38	0.00626422	0.859186	0.000398619	12.5387	1.81401	2.20313
WBGene00017542		F17E9.5	F17E9.5	698.378	131.648	146.035	469.181	1148.88	151.947	0.6635	0.858881	0.416968	0.658844	1.81363	0.178159
WBGene00019506		K07H8.5	K07H8.5	23.1689	4.42514	8.01409	13.6277	39.6165	11.1862	1	0.858741	0.343315	0.898013	1.81346	NA
WBGene00007085		AH10.4	AH10.4	2.20657	1.10628	3.56182	1.94681	6.93288	3.72875	1	0.858606	0.558183	0.342861	1.81329	NA
WBGene00008485	ugt-43	F01D4.1	F01D4.1b	81.6429	142.711	138.02	190.787	201.053	265.673	0.0396168	0.858182	0.00557288	7.68347	1.81275	1.40212
WBGene00001414	fer-1	F43G9.6	F43G9.6b.1	119.155	26.5508	29.385	68.1383	205.015	43.8128	0.464948	0.858145	0.220339	1.50216	1.81271	0.332596
WBGene00011132		R08A2.1	R08A2.1	49.6477	16.5943	15.1377	35.0426	100.032	12.1184	1	0.857438	0.287321	1.13213	1.81182	NA
WBGene00010241		F58D2.2	F58D2.2	153.356	30.976	41.8514	77.8723	288.21	42.8806	0.48892	0.855604	0.238186	1.3913	1.80952	0.310762
WBGene00006623	try-5	K07B1.1	K07B1.1.1	1.10328	8.85027	7.12364	12.6543	10.8945	7.4575	1	0.854484	0.418919	0.653346	1.80811	NA
WBGene00013299	irld-18	Y57G11B.7	Y57G11B.7	31.9952	13.2754	8.01409	16.5479	67.348	12.1184	1	0.854114	0.320983	0.984936	1.80765	NA
WBGene00015400	cyp-35A2	C03G6.15	C03G6.15	404.905	613.988	664.279	821.553	972.584	1249.13	0.00653549	0.853765	0.00042326	12.4266	1.80721	2.18472
WBGene00011383		T02E9.5	T02E9.5.2	533.989	834.138	836.137	1209.94	1498.49	1276.16	0.00148251	0.853504	5.53594e-05	16.2551	1.80688	2.829
WBGene00006380	tab-1	F31E8.3	F31E8.3	17.6525	14.3817	15.1377	27.2553	34.6644	23.3047	1	0.853431	0.145233	2.12162	1.80679	NA
WBGene00010460	clec-142	K01C8.8	K01C8.8	39.7182	16.5943	24.9327	46.7234	68.3384	31.6944	1	0.853309	0.127245	2.3258	1.80664	NA
WBGene00021386		Y37F4.5	Y37F4.5.1	15.446	12.1691	12.4664	21.4149	43.5781	7.4575	1	0.85321	0.285745	1.13956	1.80652	NA
WBGene00022744		ZK470.1	ZK470.1	6.6197	3.31885	7.12364	10.7074	11.8849	8.38968	1	0.852994	0.367383	0.812496	1.80625	NA
WBGene00017576	cdh-8	F18F11.3	F18F11.3d	108.122	40.9325	107.745	117.782	192.14	154.743	0.157381	0.85295	0.0416458	4.14954	1.80619	0.803049
WBGene00195312		C34H3.3	C34H3.3	5.51641	5.53142	3.56182	5.84043	14.8562	5.59312	1	0.85244	0.421005	0.647509	1.80555	NA
WBGene00019420	fbxb-46	K05F6.9	K05F6.9	5.51641	4.42514	0.890455	5.84043	6.93288	6.52531	1	0.852438	0.489141	0.478415	1.80555	NA
WBGene00017841		F26G1.5	F26G1.5	130.187	55.3142	98.8405	116.809	281.277	115.591	0.208925	0.852422	0.062963	3.45757	1.80553	0.680009
WBGene00010219		F57G9.3	F57G9.3	14.3427	43.1451	18.6995	48.6702	62.3959	26.1012	1	0.851259	0.172629	1.85996	1.80407	NA
WBGene00021497		Y40C5A.4	Y40C5A.4b	41.9247	88.5027	45.4132	134.33	85.1754	96.9475	0.163286	0.850839	0.0440679	4.05396	1.80355	0.787052
WBGene00050899		T10C6.15	T10C6.15a	6.6197	7.74399	7.12364	15.5745	13.8658	9.32187	1	0.850328	0.3115	1.0243	1.80291	NA
WBGene00017254	fbxb-111	F08D12.11	F08D12.11	5.51641	4.42514	3.56182	4.86702	12.8753	6.52531	1	0.849805	0.430596	0.621215	1.80226	NA
WBGene00012535		Y37A1A.2	Y37A1A.2	344.224	295.378	230.628	537.319	606.132	423.213	0.00520895	0.849785	0.000307521	13.024	1.80223	2.28325
WBGene00018040		F35D2.2	F35D2.2	18.7558	13.2754	12.4664	14.6011	52.4918	13.0506	1	0.849701	0.272763	1.2028	1.80213	NA
WBGene00015841	skpo-2	C16C8.2	C16C8.2	212.934	48.6765	154.049	145.037	369.423	234.911	0.258529	0.849661	0.0873648	2.92227	1.80208	0.587491
WBGene00006539	tbb-6	T04H1.9	T04H1.9	167.699	183.643	146.925	317.33	292.171	287.114	0.00184435	0.849629	7.49701e-05	15.6811	1.80204	2.73416
WBGene00012690		Y39B6A.31	Pseudogene:Y39B6A.31	24.2722	4.42514	12.4664	15.5745	45.5589	13.0506	1	0.84958	0.323507	0.974717	1.80198	NA
WBGene00016447	msd-4	C35D10.11	C35D10.11	467.792	153.773	79.2505	329.011	813.128	120.252	0.643474	0.849388	0.393329	0.728625	1.80174	0.191469
WBGene00194683		T20G5.15	Pseudogene:T20G5.15	3.30985	11.0628	3.56182	10.7074	15.8466	5.59312	1	0.849275	0.411392	0.674773	1.8016	NA
WBGene00010453	fozi-1	K01B6.1	K01B6.1	381.736	155.986	322.345	424.404	555.621	569.566	0.0488555	0.848762	0.00748437	7.15288	1.80095	1.31109
WBGene00018001		F33D11.2	F33D11.2.2	28.6854	14.3817	3.56182	15.5745	63.3863	4.66094	1	0.84801	0.410482	0.677405	1.80002	NA
WBGene00003415	mars-1	F58B3.5	F58B3.5b	88.2626	70.8022	184.324	230.697	221.852	167.794	0.123769	0.847995	0.0288282	4.77784	1.8	0.907386
WBGene00010265		F58G1.3	F58G1.3	81.6429	23.232	28.4945	54.5106	167.38	17.7116	0.521759	0.846406	0.267683	1.22858	1.79802	0.28253
WBGene00009269		F30A10.12	F30A10.12	15.446	17.7005	3.56182	18.4947	40.6069	6.52531	1	0.846162	0.362878	0.827909	1.79771	NA
WBGene00015763		C14C6.12	C14C6.12	3.30985	9.95656	8.01409	12.6543	7.92329	17.7116	1	0.846033	0.354809	0.856183	1.79755	NA
WBGene00008655	lips-3	F10F2.3	F10F2.3	109.225	70.8022	69.4555	77.8723	268.401	101.608	0.251959	0.844829	0.0840068	2.98563	1.79605	0.598669
WBGene00016361	drd-10	C33G8.3	C33G8.3	212.934	224.576	146.035	231.67	491.244	323.469	0.0552358	0.844078	0.00887408	6.848	1.79512	1.25778
WBGene00022374	nhr-277	Y94H6A.1	Y94H6A.1	13.2394	24.3383	48.0846	46.7234	46.5493	61.5244	1	0.843918	0.139877	2.17931	1.79492	NA
WBGene00014197		ZK1053.2	ZK1053.2	98.1922	32.0822	35.6182	88.5798	175.303	33.5587	0.424939	0.843879	0.187194	1.73956	1.79487	0.371673
WBGene00013886		ZC412.5	ZC412.5	24.2722	2.21257	3.56182	19.4681	26.7411	7.4575	1	0.843701	0.425538	0.634971	1.79465	NA
WBGene00044447		ZK688.10	ZK688.10	71.7134	11.0628	21.3709	38.9362	117.859	29.83	1	0.843464	0.269468	1.21945	1.79435	NA
WBGene00017392	basl-2	F12A10.3	Pseudogene:F12A10.3b	4.41313	4.42514	2.67136	1.94681	15.8466	2.79656	1	0.842714	0.521249	0.411421	1.79342	NA
WBGene00008499	cyp-37A1	F01D5.9	F01D5.9	601.289	418.175	474.612	842.968	917.121	917.272	0.00026947	0.84194	6.10704e-06	20.4544	1.79246	3.56949
WBGene00008680		F11A5.15	F11A5.15	30.8919	46.4639	30.2755	43.8032	89.137	59.66	1	0.841841	0.0742602	3.18625	1.79234	NA
WBGene00006553	tbx-34	Y47D3A.10	Y47D3A.10	78.3331	22.1257	13.3568	38.9362	135.686	28.8978	1	0.841835	0.276234	1.18553	1.79233	NA
WBGene00000729	col-156	F57B7.3	F57B7.3	596.876	192.493	147.815	284.234	1182.55	212.539	0.629822	0.841684	0.376379	0.782494	1.79214	0.200782
WBGene00021003		W03F9.9	W03F9.9	8.82626	6.63771	7.12364	14.6011	10.8945	14.915	1	0.841235	0.302913	1.06133	1.79158	NA
WBGene00001479	fmo-4	F53F4.5	F53F4.5a	676.312	670.408	679.417	1021.1	1605.46	1003.03	0.00214774	0.840893	9.0582e-05	15.3235	1.79116	2.66802
WBGene00013829		Y116F11B.14	Y116F11B.14	7.72298	4.42514	9.795	8.76064	15.8466	14.915	1	0.840571	0.332213	0.940252	1.79076	NA
WBGene00016561	eri-6	C41D11.1	C41D11.1e	25.3755	24.3383	24.9327	36.9894	41.5973	54.999	1	0.840323	0.0788315	3.08883	1.79045	NA
WBGene00219490		Y116A8B.98	Y116A8B.98	3.30985	1.10628	6.23318	7.78723	5.94247	5.59312	1	0.840041	0.492025	0.472095	1.7901	NA
WBGene00008048	hpo-41	C40H5.6	Pseudogene:C40H5.6	22.0657	16.5943	18.6995	41.8564	17.8274	42.8806	1	0.839886	0.163647	1.9402	1.78991	NA
WBGene00019754		M03E7.2	M03E7.2	11.0328	5.53142	16.0282	8.76064	40.6069	9.32187	1	0.839552	0.359363	0.840119	1.78949	NA
WBGene00022490		Y119D3B.13	Y119D3B.13	1291.94	1146.11	1115.74	2151.22	2060.06	2145.89	2.13493e-08	0.839457	8.95365e-11	42.0376	1.78938	7.67062
WBGene00013700		Y106G6D.3	Y106G6D.3	137.91	33.1885	43.6323	108.048	235.718	40.084	0.450954	0.839221	0.208037	1.58503	1.78908	0.345868
WBGene00010969		R01E6.5	R01E6.5	29.7886	7.74399	10.6855	11.6809	60.4151	13.9828	1	0.838557	0.341185	0.905975	1.78826	NA
WBGene00017979		F32B5.6	F32B5.6e	67.3003	38.7199	67.6746	58.4043	124.792	127.71	0.196777	0.837982	0.0576095	3.6049	1.78755	0.706026
WBGene00019063		F58F12.3	F58F12.3	34.2018	9.95656	9.795	23.3617	66.3576	6.52531	1	0.837954	0.356803	0.849115	1.78751	NA
WBGene00021052		W06A11.1	W06A11.1	69.5068	42.0388	63.2223	93.4468	131.725	87.6256	0.11322	0.837739	0.0251112	5.0162	1.78725	0.946078
WBGene00010510	ent-3	K02E11.1	K02E11.1	80.5396	27.6571	27.6041	62.2979	162.427	17.7116	0.509593	0.837569	0.257598	1.28162	1.78704	0.292777
WBGene00008449		E01G6.1	E01G6.1	214.037	48.6765	115.759	109.995	372.395	193.895	0.318602	0.837555	0.119845	2.41935	1.78702	0.496752
WBGene00015019		B0205.4	B0205.4	17.6525	12.1691	32.0564	28.2287	50.511	32.6266	1	0.837196	0.16855	1.89579	1.78657	NA
WBGene00005644	srp-3	Y32G9A.4	Y32G9A.4	78.3331	82.9713	56.0986	139.197	126.773	121.184	0.0481754	0.8369	0.00731238	7.19459	1.78621	1.31717
WBGene00008144	gasr-8	C47E8.6	C47E8.6	4.41313	14.3817	12.4664	19.4681	18.8178	17.7116	1	0.836551	0.273764	1.19779	1.78578	NA
WBGene00012448	cyp-33D3	Y17D7A.4	Y17D7A.4	3.30985	13.2754	4.45227	16.5479	4.95206	15.8472	1	0.836537	0.408899	0.681999	1.78576	NA
WBGene00004092	ppt-1	F44C4.5	F44C4.5	68.4035	117.266	77.4696	177.16	162.427	129.574	0.062582	0.835742	0.0106852	6.51693	1.78477	1.20355
WBGene00014182		ZK1025.2	ZK1025.2	153.356	74.121	105.964	94.4202	383.289	117.456	0.300423	0.835641	0.109275	2.56467	1.78465	0.522267
WBGene00014188		ZK1025.8	ZK1025.8	153.356	74.121	105.964	94.4202	383.289	117.456	0.300423	0.835641	0.109275	2.56467	1.78465	0.522267
WBGene00012482	clec-106	Y18D10A.12	Y18D10A.12	7.72298	3.31885	6.23318	3.89362	14.8562	12.1184	1	0.835432	0.415442	0.663173	1.78439	NA
WBGene00003995	pgp-1	K08E7.9	K08E7.9	1375.79	1143.9	1845.02	2560.05	2178.9	3051.05	0.00200659	0.835203	8.36688e-05	15.4735	1.78411	2.69754
WBGene00018527		F47B3.3	F47B3.3	28.6854	26.5508	44.5227	52.5638	71.3096	54.999	1	0.835034	0.0623898	3.47269	1.7839	NA
WBGene00044912		H38K22.7	H38K22.7	15.446	13.2754	1.78091	8.76064	42.5877	2.79656	1	0.834978	0.469016	0.524293	1.78383	NA
WBGene00003957	pcp-2	F23B2.12	F23B2.12	1451.92	1299.88	1574.32	2570.76	2624.59	2524.36	5.30986e-08	0.834926	2.48384e-10	40.0434	1.78377	7.27492
WBGene00008658	clec-152	F10F2.6	Pseudogene:F10F2.6	11.0328	6.63771	4.45227	7.78723	29.7123	1.86437	1	0.834854	0.460666	0.544277	1.78368	NA
WBGene00019413	fbxb-50	K05F6.2	K05F6.2	11.0328	21.0194	9.795	36.016	16.837	21.4403	1	0.834313	0.232632	1.42469	1.78301	NA
WBGene00001893	his-19	K06C4.11	K06C4.11	30.8919	24.3383	17.8091	33.0957	58.4343	38.2197	1	0.833843	0.114723	2.48792	1.78243	NA
WBGene00001895	his-21	K06C4.3	K06C4.3	30.8919	24.3383	17.8091	33.0957	58.4343	38.2197	1	0.833843	0.114723	2.48792	1.78243	NA
WBGene00001925	his-51	F07B7.10	F07B7.10	30.8919	24.3383	17.8091	33.0957	58.4343	38.2197	1	0.833843	0.114723	2.48792	1.78243	NA
WBGene00001927	his-53	F07B7.3	F07B7.3	30.8919	24.3383	17.8091	33.0957	58.4343	38.2197	1	0.833843	0.114723	2.48792	1.78243	NA
WBGene00006449	alg-4	ZK757.3	ZK757.3a.1	254.858	46.4639	37.3991	122.649	409.04	71.7784	0.682413	0.833768	0.441953	0.591207	1.78233	0.165953
WBGene00001957	hlh-13	F48D6.3	F48D6.3	6.6197	1.10628	6.23318	5.84043	8.9137	10.2541	1	0.833634	0.456927	0.553411	1.78217	NA
00_NOT_FOUND_W06G6.20.1			W06G6.20.1	6.6197	19.9131	3.56182	26.2819	13.8658	13.0506	1	0.832962	0.354439	0.857501	1.78134	NA
WBGene00011800		T16G1.6	T16G1.6	515.233	769.974	1044.5	764.122	1101.34	2284.79	0.10994	0.83269	0.0240824	5.08869	1.781	0.958844
WBGene00008194		C49C3.4	C49C3.4a	6642.87	5043.55	6588.47	10759	9753.57	12027.1	1.50525e-05	0.832275	1.68747e-07	27.3616	1.78049	4.82239
WBGene00010267	lips-9	F58G1.5	F58G1.5	118.051	51.9954	56.9891	73.9787	253.545	76.4393	0.339996	0.832252	0.132417	2.26394	1.78046	0.468526
WBGene00017949		F31D5.6	F31D5.6	11.0328	12.1691	8.01409	17.5213	25.7507	12.1184	1	0.83144	0.264236	1.24643	1.77946	NA
WBGene00008277	mltn-12	C53B4.8	C53B4.8	63.9904	19.9131	24.9327	29.2021	129.744	34.4909	1	0.831332	0.239395	1.38415	1.77933	NA
WBGene00015262		B0563.5	B0563.5	24.2722	22.1257	16.9186	33.0957	47.5397	31.6944	1	0.830986	0.116665	2.46153	1.7789	NA
WBGene00000928	dao-2	M03A1.7	M03A1.7.2	1049.22	372.818	579.686	771.91	1937.24	851.087	0.394939	0.830771	0.165605	1.92229	1.77864	0.40347
WBGene00004009	pgp-15	F22E10.4	Pseudogene:F22E10.4	14.3427	7.74399	12.4664	21.4149	15.8466	24.2369	1	0.830434	0.233318	1.42052	1.77822	NA
WBGene00008259		C52E4.7	C52E4.7	61.7838	24.3383	15.1377	46.7234	120.83	12.1184	1	0.83001	0.300874	1.07032	1.7777	NA
WBGene00016254	fbxb-114	C30E1.5	C30E1.5	3.30985	8.85027	3.56182	8.76064	5.94247	13.0506	1	0.829572	0.425372	0.635427	1.77716	NA
WBGene00006873	vab-7	M142.4	M142.4	17.6525	12.1691	23.1518	40.883	25.7507	27.9656	1	0.829521	0.161345	1.96157	1.7771	NA
WBGene00004424	rpl-12	JC8.3	JC8.3b	4686.75	4594.4	4503.03	8149.34	5920.68	10419.1	0.00105928	0.829175	3.4771e-05	17.1374	1.77667	2.97499
WBGene00014978		ZC47.8	Pseudogene:ZC47.8	4.41313	8.85027	9.795	16.5479	4.95206	19.5759	1	0.829088	0.372294	0.795994	1.77656	NA
WBGene00022507		ZC21.8	ZC21.8	18.7558	3.31885	1.78091	6.81383	29.7123	5.59312	1	0.828503	0.48128	0.495961	1.77584	NA
WBGene00018375		F43C9.1	F43C9.1	76.1265	85.1839	73.0173	119.729	204.025	92.2865	0.122348	0.828266	0.0282311	4.8139	1.77555	0.912403
WBGene00016403	grsp-3	C34D4.11	C34D4.11b	5.51641	4.42514	2.67136	2.92021	11.8849	7.4575	1	0.827995	0.474107	0.512388	1.77522	NA
WBGene00045385	lgc-24	C15A7.4	C15A7.4	2.20657	7.74399	5.34273	7.78723	12.8753	6.52531	1	0.827718	0.429488	0.624209	1.77488	NA
WBGene00199283		F32A11.9	F32A11.9	6.6197	1.10628	2.67136	7.78723	5.94247	4.66094	1	0.827561	0.511811	0.430364	1.77468	NA
WBGene00000972	dhs-8	K10H10.3	K10H10.3a	12.1361	16.5943	17.8091	32.1223	20.7986	29.83	1	0.827302	0.169903	1.8838	1.77436	NA
WBGene00044529	irld-1	D2063.4	D2063.4	30.8919	15.488	11.5759	33.0957	54.4726	14.915	1	0.826794	0.242825	1.36412	1.77374	NA
WBGene00009698		F44F1.6	F44F1.6a	36.4083	35.4011	31.1659	73.0053	52.4918	56.8634	1	0.826624	0.0462839	3.97123	1.77353	NA
WBGene00016414		C34F11.2	C34F11.2	109.225	40.9325	23.1518	74.9521	202.044	29.83	0.497983	0.826368	0.246763	1.34154	1.77322	0.302785
WBGene00194659	linc-1	W09C5.11	WBGene00194659	6.6197	4.42514	5.34273	10.7074	10.8945	7.4575	1	0.825987	0.385791	0.752167	1.77275	NA
WBGene00015210		B0496.1	B0496.1	6.6197	6.63771	1.78091	5.84043	17.8274	2.79656	1	0.825623	0.489175	0.47834	1.7723	NA
WBGene00010467		K01D12.8	K01D12.8	27.5821	7.74399	5.34273	12.6543	54.4726	4.66094	1	0.824233	0.424747	0.637144	1.77059	NA
WBGene00001959	hlh-15	C43H6.8	C43H6.8	1.10328	1.10628	2.67136	5.84043	1.98082	0.932187	1	0.82335	0.63567	0.22445	1.76951	NA
WBGene00006224	str-180	T10H9.6	T10H9.6b	14.3427	8.85027	6.23318	17.5213	10.8945	23.3047	1	0.823194	0.298813	1.07948	1.76932	NA
WBGene00007521		C11E4.7	C11E4.7a	554.951	850.733	448.789	1055.17	1278.62	943.373	0.0129589	0.82237	0.00112145	10.6155	1.76831	1.88743
WBGene00020484		T13C5.3	T13C5.3	9.92955	11.0628	4.45227	16.5479	18.8178	9.32187	1	0.822234	0.329568	0.950595	1.76814	NA
WBGene00008929		F18A11.2	F18A11.2	67.3003	29.8697	81.9218	84.6862	107.955	124.913	0.202971	0.821915	0.0602579	3.53027	1.76775	0.692566
WBGene00013215		Y54G11A.4	Y54G11A.4	46.3379	55.3142	78.36	124.596	94.0891	100.676	0.105031	0.821639	0.0224517	5.21043	1.76741	0.978682
WBGene00017212		F07E5.7	F07E5.7	7.72298	6.63771	4.45227	2.92021	22.7795	7.4575	1	0.821423	0.44658	0.579317	1.76715	NA
WBGene00020774		T24E12.5	T24E12.5	70.6101	29.8697	42.7418	61.3245	101.022	90.4222	0.223546	0.820983	0.069431	3.29642	1.76661	0.650633
WBGene00021517		Y41D4B.15	Y41D4B.15	7.72298	4.42514	2.67136	8.76064	6.93288	10.2541	1	0.820859	0.429285	0.624758	1.76646	NA
WBGene00015897	nhr-156	C17E7.1	C17E7.1	47.4412	65.2708	84.5932	145.037	101.022	103.473	0.111722	0.820363	0.0246169	5.05064	1.76585	0.951861
WBGene00002118	ins-35	K02E2.4	K02E2.4	15.446	21.0194	23.1518	23.3617	50.511	31.6944	1	0.820318	0.158297	1.99042	1.76579	NA
WBGene00003547	nas-29	F58A6.4	F58A6.4	20.9624	23.232	17.8091	24.3351	49.5206	35.4231	1	0.820161	0.140709	2.17019	1.7656	NA
WBGene00015046	nlp-34	B0213.17	B0213.17	56.2674	28.7634	47.1941	40.883	105.974	86.6934	0.280376	0.819713	0.0983884	2.73147	1.76505	0.552258
WBGene00018542	nhr-187	F47C10.4	F47C10.4	9.92955	5.53142	1.78091	11.6809	12.8753	5.59312	1	0.819701	0.440196	0.59577	1.76504	NA
WBGene00077762		Y57G11C.499	Y57G11C.499	2.20657	3.31885	5.34273	8.76064	5.94247	4.66094	1	0.819671	0.484674	0.488328	1.765	NA
WBGene00017012	acs-22	D1009.1	D1009.1a	2001.36	2193.76	2012.43	3622.04	3839.82	3487.31	2.06009e-09	0.818829	6.47983e-12	47.1788	1.76397	8.68611
WBGene00008945		F19B2.6	F19B2.6	148.943	115.054	143.363	232.644	232.747	253.555	0.0071718	0.81866	0.000484185	12.1756	1.76377	2.14437
WBGene00018135		F37A4.5	F37A4.5.1	78.3331	23.232	22.2614	29.2021	169.36	19.5759	0.573727	0.818537	0.316825	1.00201	1.76362	0.241294
WBGene00019561		K09C6.7	K09C6.7a	137.91	44.2514	32.0564	73.9787	277.315	26.1012	0.536013	0.818398	0.280954	1.16247	1.76345	0.270825
WBGene00018004		F33D11.7	F33D11.7	34.2018	22.1257	6.23318	23.3617	77.2521	9.32187	1	0.818302	0.353605	0.860477	1.76333	NA
WBGene00012847	srxa-15	Y44A6B.2	Y44A6B.2b	2.20657	1.10628	2.67136	1.94681	4.95206	3.72875	1	0.818208	0.591157	0.288541	1.76321	NA
WBGene00007343		C05E7.1	C05E7.1	144.53	74.121	61.4414	85.6596	307.028	100.676	0.327886	0.818123	0.124791	2.35614	1.76311	0.484277
WBGene00021678		Y48G1C.5	Y48G1C.5	79.4364	27.6571	26.7136	56.4574	144.6	34.4909	0.450351	0.81809	0.207469	1.589	1.76307	0.346449
WBGene00008584		F08G5.6	F08G5.6	337.605	407.113	529.821	585.016	786.387	876.256	0.00844325	0.817089	0.000600608	11.7741	1.76185	2.07349
WBGene00015689	spch-2	C10G11.9	C10G11.9	244.929	39.8262	32.0564	124.596	361.5	71.7784	0.69157	0.81698	0.453573	0.561709	1.76171	0.160164
WBGene00021542		Y43B11AL.1	Y43B11AL.1	13.2394	21.0194	31.1659	36.9894	42.5877	36.3553	1	0.816235	0.13759	2.2047	1.76081	NA
WBGene00006436	ttn-1	W06H8.8	W06H8.8e.2	1541.29	789.887	1786.25	2185.29	1739.16	3326.04	0.0523415	0.816061	0.00823601	6.98142	1.76059	1.28115
WBGene00003663	nhr-73	C27C7.4	C27C7.4	23.1689	16.5943	23.1518	34.0691	39.6165	37.2875	1	0.816025	0.111115	2.5383	1.76055	NA
WBGene00015820		C16A11.7	C16A11.7.1	55.1641	8.85027	19.59	34.0691	98.0507	14.915	1	0.815714	0.324341	0.97136	1.76017	NA
WBGene00021074		W07E6.2	W07E6.2	1296.36	1002.29	1080.12	2147.33	1700.54	2097.42	8.32009e-05	0.81548	1.40245e-06	23.2773	1.75988	4.07987
WBGene00016004		C18H9.6	C18H9.6	503.097	581.905	509.34	1001.63	990.411	812.867	7.3126e-05	0.815232	1.16775e-06	23.6296	1.75958	4.13593
WBGene00009355		F33A8.7	F33A8.7	167.699	68.5896	81.9218	84.6862	388.241	86.6934	0.397957	0.814905	0.168063	1.90013	1.75918	0.400164
WBGene00017991	clec-180	F32E10.3	F32E10.3a	492.064	150.455	277.822	273.527	988.43	357.028	0.517329	0.814862	0.263859	1.2484	1.75913	0.286233
WBGene00195178		ZC581.10	ZC581.10	19.8591	8.85027	9.795	11.6809	48.5302	7.4575	1	0.814803	0.366308	0.816152	1.75906	NA
WBGene00015135	cyp-23A1	B0304.3	B0304.3	25.3755	18.8068	28.4945	28.2287	67.348	32.6266	1	0.814717	0.152487	2.04719	1.75895	NA
WBGene00019343	nep-18	K02F6.9	K02F6.9	61.7838	40.9325	35.6182	64.2447	83.1945	95.0831	0.167619	0.81442	0.0458692	3.98639	1.75859	0.775676
WBGene00000998	dig-1	K07E12.1	K07E12.1a.1	1855.72	644.964	1541.38	2202.81	1668.84	3236.55	0.0924227	0.814309	0.0185606	5.54245	1.75846	1.03422
WBGene00000853	cut-6	M142.2	M142.2.2	26.4788	16.5943	19.59	28.2287	44.5685	37.2875	1	0.814075	0.131259	2.27756	1.75817	NA
WBGene00011438		T04F3.3	T04F3.3	60.6806	8.85027	8.01409	38.9362	80.2233	16.7794	1	0.813966	0.353894	0.859447	1.75804	NA
WBGene00009029		F21H7.3	F21H7.3	9.92955	19.9131	15.1377	29.2021	23.7699	26.1012	1	0.813858	0.189252	1.72343	1.75791	NA
WBGene00009626		F42A8.1	F42A8.1	2516.59	2305.5	1889.54	3982.2	3851.71	3958.07	3.23566e-06	0.813539	2.92277e-08	30.7581	1.75752	5.49004
WBGene00013901	ugt-16	ZC443.6	ZC443.6	353.051	422.601	543.177	764.122	752.713	803.545	0.00141326	0.813272	5.20897e-05	16.3705	1.75719	2.84978
WBGene00018851		F55A3.6	F55A3.6	11.0328	16.5943	9.795	23.3617	18.8178	23.3047	1	0.813123	0.220864	1.49875	1.75701	NA
WBGene00019404		K05B2.4	K05B2.4	45.2346	33.1885	31.1659	73.0053	59.4247	59.66	1	0.812828	0.0481169	3.9059	1.75665	NA
WBGene00016006	fln-2	C23F12.1	C23F12.1b	498.684	132.754	437.213	554.84	534.822	787.698	0.156944	0.812408	0.0414923	4.15579	1.75614	0.804255
WBGene00021978		Y58A7A.4	Y58A7A.4	40.8215	12.1691	8.01409	30.1755	29.7123	46.6094	1	0.812382	0.262001	1.25815	1.75611	NA
WBGene00003092	lys-3	Y22F5A.6	Y22F5A.6	12.1361	28.7634	16.9186	32.1223	35.6548	33.5587	1	0.81223	0.160836	1.96635	1.75592	NA
WBGene00017535	atf-8	F17A9.3	F17A9.3	69.5068	44.2514	48.0846	71.0585	132.715	80.1681	0.176654	0.812046	0.0495099	3.85798	1.7557	0.752876
WBGene00020832		T26C12.2	T26C12.2	12.1361	6.63771	12.4664	20.4415	17.8274	16.7794	1	0.812017	0.260971	1.2636	1.75566	NA
WBGene00019045	fbxb-47	F58E1.14	F58E1.14	16.5492	26.5508	14.2473	40.883	45.5589	13.9828	1	0.811167	0.224603	1.47472	1.75463	NA
WBGene00006050	ssq-1	K07F5.11	K07F5.11	429.177	109.522	89.0455	280.34	700.221	120.252	0.647142	0.810658	0.399404	0.710119	1.75401	0.189001
WBGene00008565	acox-2	F08A8.2	F08A8.2	1451.92	963.574	1079.23	1917.61	2346.28	1864.37	0.00101196	0.810476	3.28257e-05	17.2468	1.75379	2.99484
WBGene00010893	cutl-9	M28.1	M28.1	19.8591	22.1257	50.7559	61.3245	62.3959	40.084	1	0.81027	0.133933	2.24631	1.75354	NA
WBGene00013130		Y52B11B.1	Y52B11B.1	16.5492	4.42514	11.5759	13.6277	26.7411	16.7794	1	0.809858	0.310403	1.02896	1.75304	NA
WBGene00019965		R08F11.1	R08F11.1	1063.56	702.49	1006.21	1683.99	1381.62	1793.53	0.00156189	0.809356	5.99898e-05	16.103	1.75243	2.80635
WBGene00012979		Y48B6A.5	Y48B6A.5	111.432	32.0822	16.0282	42.8298	197.092	39.1519	0.553071	0.80928	0.297636	1.08476	1.75234	0.257219
WBGene00011671	cyp-13A4	T10B9.1	T10B9.1	99.2955	100.672	101.512	189.814	124.792	213.471	0.0493516	0.809128	0.00759439	7.12671	1.75215	1.3067
WBGene00000731	col-158	D2023.7	D2023.7	311.126	438.089	312.55	528.559	523.928	806.342	0.0138007	0.808968	0.00122547	10.4515	1.75196	1.8601
WBGene00000673	col-98	F14F7.1	F14F7.1	31868.3	18529.2	15870.6	44043.6	37567.3	34465.8	0.011194	0.808722	0.000911842	10.9985	1.75166	1.95102
WBGene00009185		F27C8.5	F27C8.5	105.915	40.9325	20.4805	51.5904	215.91	25.1691	0.551982	0.808686	0.296528	1.08974	1.75162	0.258075
WBGene00008125		C47A4.5	C47A4.5	23.1689	6.63771	1.78091	12.6543	39.6165	2.79656	1	0.808594	0.486671	0.483878	1.7515	NA
WBGene00006547	tbx-11	F40H6.4	F40H6.4	58.474	50.8891	65.8936	100.261	60.4151	146.353	0.18794	0.808097	0.0540978	3.70968	1.7509	0.725981
WBGene00219563	linc-95	C32A3.8	WBGene00219563	27.5821	19.9131	34.7277	51.5904	42.5877	50.3381	1	0.807855	0.087919	2.91207	1.75061	NA
WBGene00219436		C49H3.16	C49H3.16	47.4412	34.2948	25.8232	38.9362	108.945	40.084	1	0.80783	0.152418	2.04788	1.75058	NA
WBGene00012085		T27D12.1	T27D12.1b	1726.64	1278.86	1625.08	2757.65	2662.23	2687.5	1.4102e-05	0.807826	1.5468e-07	27.53	1.75057	4.85072
WBGene00021662	snpc-3.3	Y48G1BL.1	Y48G1BL.1	344.224	280.996	286.726	518.824	487.282	588.21	0.000673763	0.80685	1.97254e-05	18.2156	1.74939	3.17149
WBGene00016468		C36B7.5	C36B7.5a	59.5773	21.0194	37.3991	59.3777	73.2904	73.6428	1	0.806824	0.0929545	2.82245	1.74936	NA
WBGene00019081		F59A3.8	F59A3.8	38.6149	14.3817	22.2614	29.2021	94.0891	8.38968	1	0.8068	0.328939	0.953068	1.74933	NA
WBGene00019329	ceeh-1	K02F3.6	K02F3.6	410.421	412.644	412.281	777.75	621.978	759.733	0.000111266	0.805896	2.01911e-06	22.5768	1.74823	3.95364
WBGene00011173	acs-18	R09E10.3	R09E10.3	76.1265	30.976	29.385	54.5106	161.437	22.3725	0.502173	0.805534	0.250415	1.32099	1.74779	0.299146
WBGene00013684		Y105E8A.27	Y105E8A.27	79.4364	18.8068	7.12364	38.9362	132.715	12.1184	1	0.80553	0.386133	0.751084	1.74779	NA
WBGene00007996		C38C6.3	C38C6.3	66.197	17.7005	44.5227	26.2819	154.504	43.8128	0.508737	0.805522	0.256415	1.28801	1.74778	0.293507
WBGene00021627		Y47D7A.15	Y47D7A.15	2133.75	425.919	448.789	623.952	4187.46	446.518	0.721714	0.805517	0.494705	0.466277	1.74777	0.141635
WBGene00017635		F20D6.5	F20D6.5	204.107	179.218	131.787	282.287	412.011	205.081	0.0654504	0.805504	0.0113946	6.40272	1.74776	1.18409
WBGene00015982	bgnt-1.4	C18G1.3	C18G1.3a	7.72298	1.10628	6.23318	3.89362	18.8178	3.72875	1	0.805016	0.515704	0.422476	1.74716	NA
WBGene00001690	grd-1	R08B4.1	R08B4.1a.1	310.022	120.585	182.543	199.548	602.17	269.402	0.223562	0.804955	0.0694868	3.2951	1.74709	0.650601
WBGene00006409	hdl-2	C09G9.4	C09G9.4	47.4412	11.0628	8.01409	16.5479	88.1466	11.1862	1	0.80438	0.393147	0.729187	1.7464	NA
WBGene00016052	dod-3	C24B9.9	C24B9.9	121.361	118.372	117.54	95.3936	183.226	344.909	0.203228	0.804037	0.0604707	3.52443	1.74598	0.692018
WBGene00009146		F26C11.1	F26C11.1	150.046	127.223	95.2787	233.617	231.756	183.641	0.0313228	0.803901	0.00396114	8.30155	1.74582	1.50414
WBGene00021913	cec-8	Y55B1BR.3	Y55B1BR.3	67.3003	69.6959	81.0314	124.596	113.897	142.625	0.0471993	0.803703	0.00711098	7.24472	1.74558	1.32606
WBGene00012814		Y43F8B.3	Y43F8B.3h	300.093	51.9954	201.243	171.319	501.148	293.639	0.340619	0.803669	0.132895	2.25835	1.74553	0.467732
WBGene00004210	ptc-3	Y110A2AL.8	Y110A2AL.8c	1639.48	808.694	1183.41	1907.87	2384.91	2045.22	0.0118217	0.803445	0.000986217	10.8533	1.74526	1.92732
WBGene00018347		F42C5.5	F42C5.5b	30.8919	18.8068	8.90455	36.9894	58.4343	6.52531	1	0.803082	0.339033	0.914085	1.74482	NA
WBGene00003673	nhr-83	F48G7.3	F48G7.3	15.446	9.95656	21.3709	27.2553	28.7219	26.1012	1	0.802462	0.191493	1.70609	1.74408	NA
WBGene00016358		C33F10.12	C33F10.12	119.155	24.3383	21.3709	70.0851	185.207	31.6944	0.544424	0.801911	0.289364	1.12258	1.74341	0.264063
WBGene00022471		Y119C1B.5	Y119C1B.5	1113.21	851.839	1078.34	1850.44	1578.72	1875.56	7.77189e-05	0.801323	1.2787e-06	23.455	1.7427	4.10947
WBGene00022283	lgc-27	Y74E4A.1	Y74E4A.1b	234.999	78.5462	175.42	199.548	401.117	251.691	0.180066	0.801124	0.0510114	3.8079	1.74246	0.744569
WBGene00023460		F46H6.5	F46H6.5	16.5492	27.6571	10.6855	30.1755	43.5781	21.4403	1	0.801063	0.212498	1.55433	1.74238	NA
WBGene00001981	hnd-1	C44C10.8	C44C10.8	60.6806	50.8891	40.0705	92.4734	104.984	66.1853	0.148523	0.801038	0.0380921	4.3009	1.74235	0.828205
WBGene00018783	cbs-2	F54A3.4	F54A3.4	61.7838	26.5508	12.4664	37.9628	112.907	24.2369	1	0.800705	0.279902	1.16757	1.74195	NA
WBGene00015417		C04C3.7	C04C3.7	2.20657	2.21257	1.78091	1.94681	7.92329	0.932187	1	0.80063	0.619045	0.247212	1.74186	NA
WBGene00044513		Y58G8A.5	Y58G8A.5	4.41313	16.5943	16.0282	23.3617	22.7795	18.6437	1	0.800496	0.283197	1.15168	1.7417	NA
WBGene00015246	scl-23	B0545.3	B0545.3	24.2722	5.53142	3.56182	19.4681	34.6644	3.72875	1	0.800441	0.448453	0.574558	1.74163	NA
WBGene00012899		Y46G5A.7	Y46G5A.7	49.6477	99.5656	72.1268	152.824	116.869	115.591	0.117961	0.799945	0.0267444	4.90723	1.74103	0.928262
WBGene00018523	lact-1	F46H5.8	F46H5.8	154.46	165.943	177.2	315.383	312.97	238.64	0.00759934	0.799555	0.00052219	12.0347	1.74056	2.11922
WBGene00044340	nspc-5	C03G5.12	C03G5.12	97.0889	30.976	85.4836	114.862	175.303	82.0325	0.28054	0.799237	0.0984685	2.73018	1.74018	0.552005
WBGene00044486		Y54G2A.42	Y54G2A.42	5.51641	3.31885	1.78091	6.81383	4.95206	6.52531	1	0.798871	0.505601	0.44316	1.73974	NA
WBGene00013887	nspa-5	ZC412.6	ZC412.6	41.9247	16.5943	13.3568	47.6968	55.463	21.4403	1	0.798656	0.226869	1.46039	1.73948	NA
WBGene00000771	cpb-2	C30B5.3	C30B5.3	52.9576	23.232	9.795	24.3351	109.936	14.915	1	0.798567	0.345481	0.889987	1.73937	NA
WBGene00012726		Y39G8B.5	Y39G8B.5	6.6197	28.7634	13.3568	32.1223	19.8082	32.6266	1	0.798535	0.265256	1.24112	1.73933	NA
WBGene00219676	linc-48	F11C7.10	WBGene00219676	1.10328	3.31885	1.78091	2.92021	6.93288	0.932187	1	0.798203	0.619452	0.246638	1.73893	NA
WBGene00044280		W02A2.9	W02A2.9	24.2722	56.4205	39.18	51.5904	82.2041	74.575	1	0.79804	0.0872356	2.92466	1.73874	NA
WBGene00077752		Y105C5A.508	Y105C5A.508	2.20657	9.95656	4.45227	11.6809	4.95206	12.1184	1	0.796898	0.454933	0.558332	1.73736	NA
WBGene00012207		W02B12.12	W02B12.12b	228.38	57.5268	56.9891	134.33	403.097	57.7956	0.665376	0.796138	0.419274	0.652349	1.73645	0.176933
WBGene00015544		C06E8.5	C06E8.5	204.107	64.1645	76.5791	101.234	454.599	42.8806	0.683646	0.796105	0.443579	0.587007	1.73641	0.165169
WBGene00012175		W01C9.1	W01C9.1	7.72298	12.1691	8.01409	13.6277	19.8082	14.915	1	0.796062	0.295301	1.09529	1.73635	NA
WBGene00195147		F14E5.8	F14E5.8	4.41313	6.63771	3.56182	2.92021	15.8466	6.52531	1	0.795958	0.481963	0.494417	1.73623	NA
WBGene00018062		F35F10.13	F35F10.13	20.9624	35.4011	20.4805	51.5904	36.6452	44.745	1	0.795778	0.115415	2.47847	1.73601	NA
WBGene00020567		T19D2.1	T19D2.1	263.685	98.4593	133.568	220.963	471.436	167.794	0.243054	0.795614	0.0793647	3.07786	1.73582	0.614297
WBGene00018459		F45D11.14	F45D11.14	860.561	548.717	251.999	621.032	1335.07	925.662	0.158499	0.795547	0.0420911	4.13154	1.73574	0.799974
WBGene00019084		F59A6.2	F59A6.2	26.4788	2.21257	5.34273	8.76064	44.5685	5.59312	1	0.795497	0.482001	0.494332	1.73568	NA
WBGene00003072	lrp-2	T21E3.3	T21E3.3	1576.59	977.955	1264.45	1789.12	1756	3082.74	0.0203683	0.795448	0.0021442	9.4218	1.73562	1.69105
WBGene00016595		C42D4.2	C42D4.2	270.304	268.827	211.038	436.085	516.004	348.638	0.00843067	0.795347	0.00059796	11.7823	1.7355	2.07414
WBGene00206459		Y80D4G.1	Y80D4G.1.2	595.773	547.611	599.276	933.495	793.319	1296.67	0.00346795	0.794979	0.000177984	14.0503	1.73505	2.45993
WBGene00013148		Y53F4A.2	Y53F4A.2	14.3427	8.85027	1.78091	9.73404	26.7411	6.52531	1	0.794623	0.445319	0.582538	1.73462	NA
WBGene00013854	cyc-2.2	ZC116.2	ZC116.2	125.774	34.2948	35.6182	96.367	210.958	31.6944	0.500099	0.79432	0.248577	1.33128	1.73426	0.300944
WBGene00011120		R07E5.15	R07E5.15	112.535	43.1451	21.3709	78.8457	193.13	34.4909	0.506573	0.794148	0.254492	1.29848	1.73405	0.295358
WBGene00013771		Y113G7C.1	Y113G7C.1	290.163	45.3577	65.8936	130.436	501.148	64.3209	0.705638	0.794121	0.472003	0.517283	1.73402	0.151418
WBGene00013846		ZC84.1	ZC84.1	31.9952	14.3817	22.2614	20.4415	59.4247	39.1519	1	0.794032	0.200927	1.63563	1.73391	NA
WBGene00007080	sfxn-1.1	AH6.2	AH6.2	26.4788	8.85027	8.90455	14.6011	54.4726	7.4575	1	0.793824	0.384263	0.757019	1.73366	NA
WBGene00019920	acs-15	R07C3.4	R07C3.4	45.2346	15.488	12.4664	35.0426	83.1945	8.38968	1	0.793714	0.347104	0.884018	1.73353	NA
WBGene00013874		ZC376.2	ZC376.2a	765.678	927.066	674.074	1383.21	1422.23	1294.81	0.000121472	0.793659	2.23371e-06	22.3828	1.73347	3.91552
WBGene00004002	pgp-8	T21E8.3	T21E8.3	29.7886	27.6571	30.2755	49.6436	64.3767	38.2197	1	0.793585	0.0855285	2.95658	1.73338	NA
WBGene00018931	ugt-52	F56B3.7	F56B3.7	47.4412	26.5508	31.1659	59.3777	72.3	50.3381	1	0.793029	0.0771021	3.12495	1.73271	NA
WBGene00012254		W04E12.9	W04E12.9b	2.20657	4.42514	7.12364	10.7074	4.95206	8.38968	1	0.793015	0.468113	0.526427	1.73269	NA
WBGene00011725	lips-5	T12A7.4	T12A7.4a	156.666	154.88	216.38	253.085	318.912	343.977	0.0171545	0.792239	0.00167021	9.88071	1.73176	1.76562
WBGene00011674	cyp-13A8	T10B9.4	T10B9.4	2.20657	4.42514	4.45227	1.94681	8.9137	8.38968	1	0.791965	0.52199	0.409959	1.73143	NA
WBGene00004001	pgp-7	T21E8.2	T21E8.2	29.7886	33.1885	24.9327	34.0691	51.5014	66.1853	1	0.79142	0.103216	2.65514	1.73078	NA
WBGene00077519		T27C10.8	T27C10.8	63.9904	16.5943	12.4664	34.0691	107.955	18.6437	1	0.791281	0.328019	0.956704	1.73061	NA
WBGene00000039	acn-1	C42D8.5	C42D8.5b	1020.54	357.33	649.141	731.027	1859.99	916.34	0.423064	0.791024	0.185853	1.75019	1.7303	0.373594
WBGene00010324		F59C6.3	F59C6.3	13.2394	1.10628	8.90455	5.84043	31.6932	2.79656	1	0.790723	0.516661	0.420554	1.72994	NA
WBGene00015320		C02B8.1	C02B8.1.1	43.028	46.4639	40.9609	72.0319	90.1274	63.3887	0.143666	0.790565	0.0363944	4.37853	1.72975	0.842647
WBGene00007117	spe-42	B0240.2	B0240.2	20.9624	5.53142	5.34273	13.6277	35.6548	5.59312	1	0.790443	0.422488	0.643385	1.72961	NA
WBGene00001560	gei-3	T22H6.6	T22H6.6c	3561.4	1882.9	2524.44	4373.51	4505.38	4901.44	0.00545768	0.790249	0.000323966	12.9265	1.72937	2.26299
WBGene00004127	abu-12	F52D1.3	F52D1.3	429.177	88.5027	186.105	207.335	769.55	239.572	0.607772	0.789574	0.35329	0.861603	1.72856	0.216259
WBGene00044205		T13F3.8	T13F3.8	51.8543	13.2754	25.8232	47.6968	86.1658	23.3047	1	0.789568	0.24147	1.37199	1.72856	NA
WBGene00021786		Y51H7C.8	Y51H7C.8	9.92955	9.95656	1.78091	16.5479	17.8274	2.79656	1	0.789202	0.472211	0.516796	1.72812	NA
WBGene00003532	nas-13	F39D8.4	F39D8.4	18.7558	4.42514	16.0282	24.3351	28.7219	14.915	1	0.788531	0.303343	1.05944	1.72731	NA
WBGene00009428		F35E12.4	Pseudogene:F35E12.4	38.6149	28.7634	29.385	61.3245	51.5014	54.0669	1	0.788458	0.0639103	3.43289	1.72723	NA
WBGene00018528		F47B3.4	F47B3.4	109.225	33.1885	24.9327	66.1915	200.063	22.3725	0.554372	0.788194	0.298802	1.07953	1.72691	0.256199
WBGene00022435	cfap-36	Y108G3AL.3	Y108G3AL.3	108.122	105.097	120.211	178.133	174.312	223.725	0.0209679	0.788032	0.00224916	9.3342	1.72672	1.67844
WBGene00022002		Y59E9AR.7	Y59E9AR.7	100.399	51.9954	41.8514	60.3511	232.747	41.9484	0.459988	0.78772	0.216063	1.53033	1.72634	0.337253
WBGene00020741	dlhd-1	T23F4.3	T23F4.3	40.8215	24.3383	38.2896	49.6436	74.2808	54.999	1	0.787718	0.0793346	3.07848	1.72634	NA
WBGene00016382		C33H5.16	C33H5.16	43.028	12.1691	3.56182	16.5479	74.2808	10.2541	1	0.78765	0.427929	0.628439	1.72626	NA
WBGene00044678		B0303.16	B0303.16	1.10328	5.53142	4.45227	2.92021	6.93288	9.32187	1	0.786943	0.530129	0.394144	1.72541	NA
WBGene00016410		C34E10.9	C34E10.9	23.1689	12.1691	6.23318	12.6543	48.5302	10.2541	1	0.786786	0.371844	0.797494	1.72523	NA
WBGene00012778		Y42A5A.3	Y42A5A.3	22.0657	66.3771	39.18	46.7234	76.2617	96.9475	0.339797	0.786663	0.13223	2.26613	1.72508	0.468781
WBGene00008994		F21A3.4	F21A3.4	19.8591	7.74399	9.795	11.6809	40.6069	12.1184	1	0.786051	0.347004	0.884385	1.72435	NA
WBGene00000788	cpz-1	F32B5.8	F32B5.8b.3	16480.8	12960.1	12945.4	24948.4	22929	25188.6	3.49731e-06	0.785644	3.21553e-08	30.5729	1.72386	5.45627
WBGene00017927		F29C4.4	F29C4.4.2	2.20657	1.10628	4.45227	6.81383	3.96165	2.79656	1	0.785424	0.575464	0.313626	1.7236	NA
WBGene00020053		R13A5.11	R13A5.11	35.3051	8.85027	11.5759	25.3085	58.4343	12.1184	1	0.785391	0.336285	0.924545	1.72356	NA
WBGene00011134	ssp-33	R08A2.3	R08A2.3	17.6525	13.2754	6.23318	15.5745	43.5781	4.66094	1	0.784692	0.401593	0.703551	1.72272	NA
WBGene00011075		R07A4.4	R07A4.4	19.8591	14.3817	21.3709	16.5479	50.511	28.8978	1	0.783462	0.223947	1.4789	1.72126	NA
WBGene00018396		F43E2.9	F43E2.9	14.3427	6.63771	16.9186	15.5745	25.7507	24.2369	1	0.783383	0.269738	1.21808	1.72116	NA
WBGene00006509	tag-164	Y76A2A.1	Y76A2A.1	79.4364	40.9325	30.2755	56.4574	160.447	41.9484	0.432998	0.783288	0.19256	1.69792	1.72105	0.363514
WBGene00015694	ugt-27	C10H11.5	C10H11.5	4.41313	7.74399	13.3568	9.73404	16.837	17.7116	1	0.783254	0.356973	0.848516	1.72101	NA
WBGene00020977	oac-52	W03B1.8	W03B1.8	18.7558	17.7005	18.6995	34.0691	37.6356	23.3047	1	0.783113	0.160029	1.97395	1.72084	NA
WBGene00020302		T07D1.3	T07D1.3	4.41313	9.95656	12.4664	13.6277	19.8082	13.0506	1	0.78291	0.336996	0.921826	1.7206	NA
WBGene00018206	ugt-61	F39G3.1	F39G3.1	6652.8	6948.57	8419.25	11415.1	11253.1	15218	0.000211221	0.782734	4.42919e-06	21.0695	1.72039	3.67526
WBGene00007735		C25G4.8	C25G4.8	16.5492	6.63771	8.90455	7.78723	45.5589	1.86437	1	0.782595	0.480647	0.497394	1.72022	NA
WBGene00010915		M110.7	M110.7	26.4788	11.0628	7.12364	12.6543	57.4439	6.52531	1	0.782551	0.409786	0.679423	1.72017	NA
WBGene00021261		Y22D7AR.7	Y22D7AR.7	16.5492	9.95656	12.4664	28.2287	25.7507	13.0506	1	0.781882	0.260246	1.26745	1.71937	NA
WBGene00006233	str-196	T01G6.3	T01G6.3	1.10328	2.21257	1.78091	3.89362	3.96165	0.932187	1	0.781596	0.64049	0.218102	1.71903	NA
WBGene00001544	gcy-19	C17F4.6	C17F4.6	50.751	38.7199	73.0173	89.5532	72.3	118.388	0.188981	0.781555	0.0544737	3.69812	1.71898	0.723581
WBGene00019748	atg-2	M03A8.2	M03A8.2	852.838	527.698	751.544	1080.48	1072.62	1512.01	0.0091599	0.781486	0.000676705	11.5522	1.7189	2.03811
WBGene00006624	try-6	F48A9.3	F48A9.3	22.0657	25.4445	16.9186	26.2819	52.4918	31.6944	1	0.781456	0.164807	1.92956	1.71887	NA
WBGene00012172		W01B6.5	W01B6.5	25.3755	9.95656	7.12364	14.6011	54.4726	3.72875	1	0.781387	0.433668	0.61298	1.71878	NA
WBGene00077531		F40G9.15	F40G9.15	1.10328	1.10628	4.45227	5.84043	3.96165	1.86437	1	0.780971	0.61001	0.260161	1.71829	NA
WBGene00219304		F56D6.16	Pseudogene:F56D6.16	107.018	169.261	102.402	214.149	259.488	176.183	0.0644722	0.780961	0.0111435	6.44229	1.71828	1.19063
WBGene00005012		F26F4.2	F26F4.2	59.5773	23.232	21.3709	36.016	129.744	13.0506	1	0.780883	0.323588	0.97439	1.71818	NA
WBGene00016337	fbxb-38	C33C12.5	C33C12.5	14.3427	27.6571	12.4664	27.2553	44.5685	21.4403	1	0.780833	0.224288	1.47672	1.71812	NA
WBGene00021579	clec-73	Y46C8AL.1	Y46C8AL.1	221.76	56.4205	39.18	121.676	366.452	56.8634	0.684748	0.78076	0.444791	0.583893	1.71804	0.164469
WBGene00008916	clec-221	F17C11.5	F17C11.5	7.72298	14.3817	6.23318	15.5745	19.8082	13.0506	1	0.780631	0.322428	0.979071	1.71788	NA
WBGene00003879	ora-1	F57H12.3	F57H12.3	142.323	70.8022	89.9359	47.6968	318.912	153.811	0.400905	0.780297	0.170172	1.88143	1.71748	0.396958
WBGene00017806		F26A1.8	F26A1.8	9.92955	11.0628	4.45227	17.5213	10.8945	14.915	1	0.779805	0.348374	0.879369	1.7169	NA
WBGene00005137	srd-60	C13B7.3	C13B7.3	3.30985	1.10628	1.78091	2.92021	3.96165	3.72875	1	0.779725	0.603863	0.269209	1.7168	NA
WBGene00021570	srd-73	Y45G12C.7	Y45G12C.7	3.30985	1.10628	1.78091	2.92021	3.96165	3.72875	1	0.779725	0.603863	0.269209	1.7168	NA
WBGene00000301	cav-1	T13F2.8	T13F2.8c	839.598	852.945	780.929	1643.11	1399.45	1202.52	0.000147487	0.779481	2.84293e-06	21.9198	1.71651	3.83125
WBGene00008851		F15B9.8	F15B9.8.2	214.037	129.435	131.787	138.223	481.34	195.759	0.245342	0.779095	0.080633	3.0521	1.71605	0.610228
WBGene00006038	ssp-9	E03H12.10	E03H12.10	325.468	74.121	77.4696	211.229	545.717	61.5244	0.695366	0.779067	0.459301	0.547598	1.71602	0.157787
WBGene00019994	cdh-1	R10F2.1	R10F2.1	417.041	203.556	380.224	557.761	537.793	622.701	0.0334842	0.779006	0.0043533	8.13024	1.71595	1.47516
WBGene00018670		F52C6.13	F52C6.13	16.5492	24.3383	8.90455	26.2819	28.7219	29.83	1	0.778729	0.218599	1.51354	1.71562	NA
WBGene00020702		T22F7.3	T22F7.3	70.6101	30.976	57.8796	69.1117	103.993	100.676	0.220758	0.778494	0.0681201	3.32775	1.71534	0.656083
WBGene00022859		ZK1193.3	ZK1193.3	385.046	268.827	426.528	523.691	541.755	788.63	0.0202708	0.778214	0.00212861	9.43519	1.71501	1.69313
WBGene00019407		K05F1.5	K05F1.5	164.389	159.305	154.939	262.819	321.884	235.843	0.0100362	0.77772	0.000780297	11.2875	1.71442	1.99843
WBGene00016242		C30A5.10	C30A5.10a	26.4788	4.42514	20.4805	12.6543	49.5206	26.1012	1	0.777609	0.342025	0.902828	1.71429	NA
WBGene00011185		R10D12.1	R10D12.1	129.084	202.45	143.363	268.66	292.171	252.623	0.0223865	0.777606	0.00244286	9.18291	1.71428	1.65001
WBGene00021639		Y47G6A.13	Y47G6A.13	30.8919	26.5508	22.2614	29.2021	81.2137	26.1012	1	0.777389	0.201561	1.63103	1.71403	NA
WBGene00021222	irld-53	Y19D10A.7	Y19D10A.7	36.4083	45.3577	40.0705	57.4309	84.185	67.1175	1	0.776713	0.0494867	3.85877	1.71322	NA
WBGene00021520		Y41D4B.18	Pseudogene:Y41D4B.18	113.638	58.6331	89.0455	144.064	150.543	152.879	0.0893668	0.775678	0.0176297	5.63257	1.71199	1.04882
WBGene00008150	mam-2	C47E12.6	C47E12.6	108.122	35.4011	65.8936	78.8457	222.843	56.8634	0.415691	0.775486	0.180673	1.79208	1.71177	0.381229
WBGene00008707		F11E6.3	F11E6.3.2	76792.9	36023.9	36413.4	89572.7	89984.8	75884.7	0.0310613	0.775468	0.00392055	8.32025	1.71174	1.50778
WBGene00013960	cutl-8	ZK265.8	ZK265.8a	17.6525	5.53142	34.7277	27.2553	46.5493	26.1012	1	0.775346	0.290325	1.11811	1.7116	NA
WBGene00219415	linc-38	Y22F5A.12	WBGene00219415	6.6197	5.53142	5.34273	9.73404	9.90411	10.2541	1	0.775339	0.398808	0.711918	1.71159	NA
WBGene00009039		F22B3.8	F22B3.8	23.1689	5.53142	6.23318	10.7074	38.626	10.2541	1	0.775274	0.408318	0.683694	1.71151	NA
WBGene00013849		ZC84.6	ZC84.6	40.8215	13.2754	39.18	32.1223	66.3576	61.5244	1	0.775023	0.180909	1.79014	1.71122	NA
WBGene00077764		F59C6.16	F59C6.16	467.792	998.975	441.666	1098	1331.11	834.308	0.0783364	0.774617	0.0145419	5.97113	1.71074	1.10604
WBGene00000399	cdh-7	R05H10.6	R05H10.6	219.553	56.4205	150.487	159.638	370.414	199.488	0.289117	0.774077	0.10381	2.64602	1.7101	0.538926
WBGene00015676	mct-6	C10E2.6	C10E2.6	7204.44	4399.69	5833.37	10604.3	8939.45	10274.6	0.00135632	0.774006	4.92585e-05	16.4764	1.71001	2.86764
WBGene00022557	fbxb-15	ZC204.7	ZC204.7	45.2346	65.2708	33.8373	107.074	82.2041	56.8634	0.242811	0.773971	0.0791075	3.08314	1.70997	0.614732
WBGene00015370		C03A7.12	C03A7.12	34.2018	30.976	16.0282	41.8564	50.511	45.6772	1	0.773595	0.127076	2.32786	1.70952	NA
WBGene00009941		F52F12.8	F52F12.8	20.9624	11.0628	2.67136	13.6277	43.5781	1.86437	1	0.773453	0.49404	0.467716	1.70936	NA
WBGene00010832		M02G9.3	M02G9.3	7.72298	8.85027	13.3568	5.84043	29.7123	15.8472	1	0.773137	0.374549	0.788517	1.70898	NA
WBGene00006789	unc-54	F11C3.3	F11C3.3.3	142784	57384.1	82515.8	157500	159698	165851	0.0329059	0.772984	0.00426219	8.1686	1.7088	1.48273
WBGene00012597	nhr-235	Y38E10A.19	Y38E10A.19	25.3755	26.5508	6.23318	34.0691	35.6548	28.8978	1	0.772602	0.250908	1.31824	1.70835	NA
WBGene00021600		Y46H3A.4	Y46H3A.4	14.3427	16.5943	10.6855	32.1223	25.7507	13.0506	1	0.77257	0.260645	1.26533	1.70831	NA
WBGene00219319		H25P06.5	H25P06.5	1.10328	3.31885	1.78091	5.84043	0.990411	3.72875	1	0.77254	0.626667	0.236608	1.70828	NA
WBGene00012404		Y6G8.2	Y6G8.2c	50.751	23.232	69.4555	31.1489	112.907	101.608	0.42652	0.772421	0.18846	1.72962	1.70813	0.37006
WBGene00007597		C15A11.2	C15A11.2.2	52.9576	18.8068	14.2473	31.1489	90.1274	25.1691	1	0.771607	0.282504	1.155	1.70717	NA
WBGene00003425	msp-10	K07F5.2	K07F5.2	721.547	205.769	181.653	559.707	1171.66	161.268	0.663658	0.771341	0.417477	0.657407	1.70686	0.178055
WBGene00002090	ins-7	ZK1251.2	ZK1251.2b	23.1689	37.6137	17.8091	38.9362	55.463	39.1519	1	0.770736	0.141753	2.15882	1.70614	NA
WBGene00016839		C50F2.5	C50F2.5	44.1313	17.7005	16.0282	28.2287	95.0795	9.32187	1	0.770287	0.352903	0.86299	1.70561	NA
WBGene00006621	try-3	C43G2.5	C43G2.5a	52.9576	60.8456	65.8936	89.5532	112.907	104.405	0.0909225	0.769819	0.018064	5.58993	1.70506	1.04133
WBGene00009149		F26D2.10	F26D2.10	59.5773	11.0628	16.9186	36.9894	97.0603	14.915	1	0.768718	0.3473	0.883299	1.70375	NA
WBGene00007479		C09F9.2	C09F9.2	410.421	105.097	363.306	374.761	632.873	490.33	0.21663	0.768622	0.0660424	3.37874	1.70364	0.664282
WBGene00004976	spe-41	K01A11.4	K01A11.4a	208.52	127.223	148.706	255.032	337.73	232.115	0.0461215	0.768336	0.00688834	7.30186	1.7033	1.3361
WBGene00000831	ctl-2	Y54G11A.5	Y54G11A.5.2	2988.79	2419.44	2974.12	4777.47	4497.46	5002.12	3.37656e-06	0.768116	3.07727e-08	30.6582	1.70304	5.47153
WBGene00007174	mboa-1	B0395.2	B0395.2	86.0561	53.1016	59.6605	79.8191	165.399	93.2187	0.207437	0.768103	0.0622194	3.47722	1.70303	0.683114
WBGene00022133		Y71F9B.15	Y71F9B.15	25.3755	9.95656	2.67136	21.4149	31.6932	11.1862	1	0.768036	0.400774	0.706002	1.70295	NA
WBGene00017179	wht-4	F02E11.1	F02E11.1	58.474	15.488	7.12364	26.2819	103.993	7.4575	1	0.767603	0.426664	0.631888	1.70244	NA
WBGene00013062		Y51A2A.6	Y51A2A.6	1.10328	5.53142	0.890455	3.89362	6.93288	1.86437	1	0.767281	0.616812	0.250373	1.70206	NA
WBGene00016765		C49C8.1	C49C8.1	54.0609	14.3817	12.4664	22.3883	102.012	13.0506	1	0.767272	0.377258	0.779617	1.70205	NA
WBGene00021249		Y22D7AL.11	Y22D7AL.11	145.633	143.817	133.568	202.468	280.286	236.776	0.0165135	0.767056	0.00157423	9.98964	1.70179	1.78216
WBGene00016973	abch-1	C56E6.5	C56E6.5	12.1361	14.3817	20.4805	38.9362	22.7795	18.6437	1	0.766803	0.236428	1.40177	1.70149	NA
WBGene00018500		F46F5.9	F46F5.9	24.2722	4.42514	7.12364	23.3617	34.6644	2.79656	1	0.766644	0.459805	0.546368	1.70131	NA
WBGene00015932		C17H12.6	C17H12.6a	55.1641	85.1839	62.3318	85.6596	137.667	121.184	0.133386	0.7666	0.0323487	4.57992	1.70126	0.874891
WBGene00012491		Y20C6A.1	Y20C6A.1b	79.4364	57.5268	86.3741	105.128	134.696	140.76	0.0909225	0.766283	0.0180655	5.58979	1.70088	1.04133
WBGene00007248	catp-4	C01G12.8	C01G12.8	326.572	91.8216	73.9077	183.973	532.841	120.252	0.643046	0.766278	0.392912	0.729911	1.70088	0.191758
WBGene00018737		F53B1.4	F53B1.4	685.139	203.556	338.373	380.601	1276.64	429.738	0.554581	0.766257	0.298961	1.07882	1.70085	0.256035
WBGene00044697	poml-4	K05F6.11	K05F6.11	17.6525	34.2948	28.4945	41.8564	64.3767	30.7622	1	0.765999	0.157294	2.00005	1.70055	NA
WBGene00007907		C34B4.2	C34B4.2b	9.92955	32.0822	87.2646	61.3245	48.5302	110.93	0.524434	0.76574	0.270087	1.21631	1.70024	0.280309
WBGene00008567		F08A8.4	F08A8.4.2	1387.93	1420.47	1271.57	2113.26	2411.65	2409.7	1.12594e-06	0.765666	7.71874e-09	33.3447	1.70015	5.94849
WBGene00016945	sulp-1	C55B7.6	C55B7.6	41.9247	50.8891	87.2646	104.154	98.0507	105.337	0.173168	0.765238	0.0480719	3.90747	1.69965	0.761532
WBGene00017678	asp-12	F21F8.4	F21F8.4.2	225.07	234.532	237.751	461.394	350.606	372.875	0.00356135	0.764429	0.000184114	13.9866	1.6987	2.44839
WBGene00000019	abt-1	C24F3.5	C24F3.5b	79.4364	35.4011	42.7418	79.8191	147.571	40.084	0.395747	0.764076	0.166233	1.91659	1.69828	0.402582
WBGene00011384		T02G6.1	T02G6.1	1.10328	4.42514	3.56182	3.89362	6.93288	4.66094	1	0.763454	0.558566	0.342194	1.69755	NA
WBGene00044492		Y54G2A.49	Y54G2A.49b	37.5116	50.8891	30.2755	61.3245	55.463	83.8968	1	0.763194	0.0762595	3.14287	1.69724	NA
WBGene00017027		D1044.1	D1044.1	87.1593	70.8022	73.9077	148.931	130.734	113.727	0.0620685	0.763185	0.0105625	6.53748	1.69723	1.20713
WBGene00015106		B0280.11	B0280.11	47.4412	8.85027	13.3568	22.3883	89.137	6.52531	1	0.762997	0.421915	0.644975	1.69701	NA
WBGene00010714	mam-3	K09B11.10	K09B11.10	84.9528	46.4639	51.6464	53.5372	185.207	71.7784	0.366134	0.76299	0.148237	2.0903	1.697	0.43636
WBGene00011114		R07E5.6	R07E5.6	73.92	15.488	8.01409	41.8564	111.916	11.1862	1	0.762967	0.404292	0.695523	1.69698	NA
WBGene00008422		D2045.2	D2045.2	5236.18	3711.58	5222.52	7730.78	6173.23	10127.3	0.00591083	0.762001	0.000365252	12.7021	1.69584	2.22835
WBGene00016419	tyr-4	C34G6.2	C34G6.2	3297.71	2470.33	2903.77	4799.86	4816.37	5087.88	1.4909e-05	0.761809	1.65936e-07	27.3941	1.69562	4.82655
WBGene00009394	clec-63	F35C5.6	F35C5.6	44763.5	31081.1	32594.2	62027.3	64813.5	57000.4	0.000248492	0.761592	5.53858e-06	20.6414	1.69536	3.60469
WBGene00001536	gcy-9	ZK455.2	ZK455.2	24.2722	35.4011	53.4273	68.1383	57.4439	67.1175	1	0.761453	0.0914635	2.84843	1.6952	NA
WBGene00011733		T12D8.5	T12D8.5	318.849	380.562	406.938	566.521	552.65	756.936	0.00450019	0.761295	0.000250443	13.4088	1.69501	2.34677
WBGene00012721		Y39E4B.13	Y39E4B.13	20.9624	6.63771	6.23318	15.5745	22.7795	18.6437	1	0.760768	0.342433	0.9013	1.69439	NA
WBGene00016680		C45G9.9	C45G9.9	252.652	60.8456	45.4132	169.372	400.126	38.2197	0.718484	0.760249	0.490636	0.47513	1.69378	0.143583
WBGene00019831		R02F2.1	R02F2.1d.2	26029.8	20633.3	22067.2	39919.3	34218.7	42241.1	1.84343e-05	0.759829	2.21316e-07	26.8374	1.69329	4.73437
WBGene00000220	atf-2	K08F8.2	K08F8.2	135.704	50.8891	105.964	116.809	192.14	186.437	0.205028	0.759079	0.0611827	3.50503	1.69241	0.688186
WBGene00009531		F38B2.4	F38B2.4b	80.5396	140.498	132.678	194.681	136.677	267.538	0.130836	0.759074	0.0314095	4.63044	1.6924	0.883273
WBGene00017481		F15B10.3	F15B10.3a	83.8495	163.73	65.8936	189.814	210.958	128.642	0.196158	0.758914	0.057381	3.61151	1.69222	0.707393
WBGene00018418		F44E2.4	F44E2.4	744.716	140.498	474.612	531.479	1209.29	560.244	0.560323	0.758783	0.304267	1.0554	1.69206	0.251562
WBGene00016425		C34H4.2	C34H4.2	1154.03	808.694	819.218	1519.48	1553.96	1631.33	0.000910361	0.75859	2.84878e-05	17.5161	1.69184	3.04079
WBGene00010382		H12D21.6	H12D21.6	1.10328	1.10628	1.78091	3.89362	1.98082	0.932187	1	0.75815	0.680394	0.169683	1.69132	NA
WBGene00018110		F36H9.1	F36H9.1	1.10328	1.10628	1.78091	3.89362	1.98082	0.932187	1	0.75815	0.680394	0.169683	1.69132	NA
WBGene00017724		F22F7.7	F22F7.7.1	794.364	563.099	682.979	1229.41	1081.53	1140.06	0.000613043	0.758104	1.73545e-05	18.4596	1.69127	3.21251
WBGene00022860		ZK1193.4	ZK1193.4	171.009	106.203	169.186	215.122	215.91	324.401	0.0691036	0.757946	0.0122947	6.26787	1.69108	1.1605
WBGene00008563		F07H5.13	F07H5.13	290.163	635.007	234.19	748.548	712.106	497.788	0.130562	0.757488	0.0312848	4.63726	1.69055	0.884182
WBGene00021389		Y38A10A.2	Y38A10A.2	98.1922	53.1016	58.77	51.5904	229.775	73.6428	0.414281	0.757457	0.179625	1.80072	1.69051	0.382705
WBGene00003664	nhr-74	C27C7.3	C27C7.3	242.722	215.725	184.324	397.149	346.644	341.181	0.0055788	0.757262	0.000335655	12.8601	1.69028	2.25346
WBGene00003402	mpk-2	C04G6.1	C04G6.1c.1	196.384	225.682	275.15	380.601	394.184	405.501	0.00514541	0.756987	0.000303355	13.0496	1.68996	2.28858
WBGene00016397		C34D4.1	C34D4.1	8.82626	15.488	24.9327	22.3883	29.7123	31.6944	1	0.756773	0.241991	1.36896	1.68971	NA
WBGene00020825	tmem-231	T26A8.2	T26A8.2	7.72298	13.2754	21.3709	27.2553	16.837	27.9656	1	0.756535	0.275305	1.19012	1.68943	NA
WBGene00008476		E03H4.8	E03H4.8	219.553	213.513	218.161	392.282	392.203	316.011	0.00334503	0.756514	0.000169963	14.1371	1.6894	2.4756
WBGene00011401		T03F6.6	T03F6.6.2	174.319	63.0582	36.5086	132.383	281.277	48.4737	0.496712	0.756496	0.245779	1.34714	1.68938	0.303895
WBGene00013875		ZC376.3	ZC376.3	317.745	233.426	262.684	443.872	480.349	450.246	0.0027994	0.756363	0.000132929	14.5998	1.68923	2.55293
WBGene00012118	grsp-2	T28C6.1	T28C6.1c	241.619	138.286	186.995	312.463	309.999	334.655	0.0273771	0.755759	0.00326564	8.65277	1.68852	1.56261
WBGene00014997		AC7.3	AC7.3	8.82626	6.63771	2.67136	5.84043	22.7795	1.86437	1	0.755753	0.527295	0.399602	1.68851	NA
WBGene00016956		C55C3.6	C55C3.6a	20.9624	5.53142	7.12364	7.78723	37.6356	11.1862	1	0.755486	0.422709	0.642771	1.6882	NA
WBGene00001729	grl-20	C23H5.9	C23H5.9	13.2394	4.42514	3.56182	12.6543	8.9137	13.9828	1	0.755456	0.42857	0.626696	1.68816	NA
WBGene00022090		Y69A2AR.19	Y69A2AR.19a	247.135	57.5268	81.9218	126.543	461.532	64.3209	0.68452	0.75522	0.444532	0.584556	1.68789	0.164614
WBGene00011107		R07E3.6	R07E3.6	728.167	324.141	508.45	731.027	1151.85	751.343	0.0694924	0.755086	0.0124142	6.25074	1.68773	1.15806
WBGene00010679		K08F4.5	K08F4.5	63.9904	25.4445	9.795	23.3617	129.744	13.9828	1	0.754789	0.39411	0.726222	1.68738	NA
WBGene00018195	btb-16	F39E9.2	F39E9.2	78.3331	134.967	104.183	144.064	206.996	184.573	0.0840115	0.754774	0.0161058	5.79129	1.68737	1.07566
WBGene00017851		F27C1.1	F27C1.1	482.135	178.112	120.211	388.388	803.224	124.913	0.65013	0.754624	0.403427	0.698089	1.68719	0.187
WBGene00008712		F11E6.9	F11E6.9	45.2346	26.5508	24.9327	29.2021	103.003	30.7622	1	0.754123	0.233615	1.41872	1.68661	NA
WBGene00010148		F56D5.3	F56D5.3	59.5773	70.8022	80.1409	117.782	130.734	107.202	0.0801898	0.753516	0.0149614	5.921	1.6859	1.09588
WBGene00012699		Y39B6A.41	Y39B6A.41	91.5725	103.991	93.4977	166.452	176.293	144.489	0.033546	0.7535	0.00436978	8.12339	1.68588	1.47436
WBGene00019568		K09D9.11	K09D9.11	16.5492	6.63771	3.56182	14.6011	21.789	8.38968	1	0.752991	0.415172	0.663942	1.68528	NA
WBGene00016909	frpr-4	C54A12.2	C54A12.2	20.9624	42.0388	32.9468	55.484	46.5493	59.66	1	0.752825	0.106591	2.60405	1.68509	NA
WBGene00017551		F18A12.2	F18A12.2	4.41313	5.53142	1.78091	2.92021	14.8562	1.86437	1	0.752155	0.574243	0.315635	1.68431	NA
WBGene00195182		C17G10.10	C17G10.10	3.30985	2.21257	0.890455	4.86702	3.96165	1.86437	1	0.75198	0.623531	0.240936	1.6841	NA
WBGene00018468	tag-80	F45E4.3	F45E4.3b	61.7838	56.4205	181.653	108.048	77.2521	320.672	0.446925	0.75198	0.203835	1.61468	1.6841	0.349765
WBGene00013812		Y116A8C.40	Y116A8C.40	2.20657	3.31885	9.795	12.6543	7.92329	5.59312	1	0.75165	0.495423	0.464728	1.68372	NA
WBGene00016096		C25E10.7	C25E10.7	7.72298	9.95656	9.795	16.5479	14.8562	14.915	1	0.751637	0.316148	1.00482	1.6837	NA
WBGene00010142		F56A8.8	F56A8.8	39.7182	51.9954	32.0564	84.6862	64.3767	58.7278	1	0.751601	0.0704869	3.27165	1.68366	NA
WBGene00000402	cdh-10	C45G7.5	C45G7.5	390.562	99.5656	292.96	305.649	663.576	349.57	0.267664	0.751483	0.092006	2.83892	1.68352	0.572411
WBGene00015910		C17F4.2	C17F4.2	22.0657	32.0822	21.3709	28.2287	61.4055	37.2875	1	0.751211	0.168343	1.89764	1.6832	NA
WBGene00019152	nspb-6	H04M03.2	H04M03.2	65.0937	22.1257	17.8091	38.9362	118.849	18.6437	1	0.750838	0.321161	0.984214	1.68277	NA
WBGene00011003		R04B5.5	R04B5.5	347.534	363.967	236.861	567.495	541.755	483.805	0.00965405	0.750475	0.000732755	11.4043	1.68235	2.01529
WBGene00219718	linc-42	R10F2.8	WBGene00219718	5.51641	6.63771	6.23318	5.84043	14.8562	10.2541	1	0.75027	0.42749	0.629633	1.68211	NA
WBGene00018145		F37C4.5	F37C4.5b	14244.5	9447.67	9774.52	20129	16252.6	19906.9	0.00182874	0.750165	7.38929e-05	15.7085	1.68198	2.73785
WBGene00000002	aat-1	F27C8.1	F27C8.1	324.365	392.731	378.443	603.511	665.556	573.295	0.000629471	0.749318	1.81749e-05	18.3716	1.681	3.20102
WBGene00007072	ugt-1	AC3.7	AC3.7	430.28	415.963	380.224	650.234	797.281	613.379	0.00106118	0.749282	3.49192e-05	17.1293	1.68096	2.97421
WBGene00013279		Y57A10B.7	Y57A10B.7	28.6854	9.95656	8.90455	11.6809	64.3767	3.72875	1	0.749056	0.462583	0.539637	1.68069	NA
WBGene00017018		D1014.5	D1014.5	130.187	51.9954	112.197	93.4468	269.392	132.371	0.309446	0.749049	0.114431	2.49194	1.68068	0.509415
WBGene00015964	glb-5	C18C4.1	C18C4.1b	3.30985	5.53142	7.12364	9.73404	7.92329	9.32187	1	0.748364	0.446853	0.578622	1.67989	NA
WBGene00011971	lron-9	T23G11.6	T23G11.6b	404.905	417.069	598.386	746.601	947.824	694.479	0.0102639	0.748352	0.000802965	11.2344	1.67987	1.98869
WBGene00014184		ZK1025.4	ZK1025.4a	27.5821	19.9131	29.385	19.4681	78.2425	31.6944	1	0.748251	0.242981	1.36322	1.67976	NA
WBGene00013171		Y53F4B.25	Y53F4B.25a	92.6758	19.9131	37.3991	43.8032	142.619	65.2531	0.49006	0.748005	0.239689	1.38242	1.67947	0.309751
WBGene00018052		F35F10.1	F35F10.1	296.783	370.605	235.97	587.936	469.455	457.704	0.0145633	0.747877	0.00131667	10.319	1.67932	1.83674
WBGene00013523		Y73F8A.14	Y73F8A.14	30.8919	6.63771	5.34273	16.5479	51.5014	3.72875	1	0.747671	0.476108	0.507765	1.67908	NA
WBGene00003997	pgp-3	ZK455.7	ZK455.7.2	909.105	877.283	1013.34	1637.27	1418.27	1647.17	2.02308e-05	0.747658	2.46379e-07	26.6301	1.67906	4.69399
WBGene00009658		F43G6.5	F43G6.5	13.2394	13.2754	2.67136	20.4415	18.8178	9.32187	1	0.747258	0.403905	0.696668	1.6786	NA
WBGene00014168		ZK945.6	ZK945.6a	20.9624	8.85027	5.34273	13.6277	38.626	6.52531	1	0.747225	0.424569	0.637634	1.67856	NA
WBGene00011336	ubxn-5	T01E8.9	T01E8.9	72.8167	24.3383	24.9327	65.2181	119.84	19.5759	1	0.746995	0.284667	1.14467	1.67829	NA
WBGene00017131		E04F6.15	E04F6.15	250.445	376.137	223.504	494.489	544.726	385.925	0.032387	0.746799	0.00416624	8.2099	1.67807	1.48963
WBGene00021969		Y57G7A.6	Y57G7A.6	194.178	44.2514	37.3991	111.941	320.893	29.83	0.726229	0.746757	0.50138	0.452013	1.67802	0.138926
WBGene00001758	gst-10	Y45G12C.2	Y45G12C.2	1543.49	1229.08	936.758	1847.52	2519.61	1852.26	0.00906252	0.746141	0.000665126	11.5843	1.6773	2.04275
WBGene00016357		C33F10.11	C33F10.11b.2	139.014	44.2514	25.8232	78.8457	237.699	33.5587	0.561986	0.745571	0.305783	1.0488	1.67664	0.250275
WBGene00020413		T10E9.3	T10E9.3	603.496	334.098	332.14	401.043	1313.29	413.891	0.250869	0.745347	0.0834163	2.99705	1.67638	0.600553
WBGene00015292		C01C4.2	C01C4.2	3.30985	2.21257	5.34273	4.86702	7.92329	5.59312	1	0.745182	0.527644	0.398928	1.67619	NA
WBGene00019953	wapl-1	R08C7.10	R08C7.10c	24.2722	39.8262	29.385	61.3245	32.6836	62.4565	1	0.744935	0.134267	2.24247	1.6759	NA
WBGene00195226		ZC404.16	ZC404.16	6.6197	11.0628	11.5759	19.4681	13.8658	15.8472	1	0.744759	0.32152	0.982753	1.67569	NA
WBGene00010035		F54C8.1	F54C8.1	113.638	56.4205	50.7559	109.021	179.264	81.1003	0.284391	0.744573	0.100967	2.6902	1.67548	0.546084
WBGene00021599	srt-42	Y46H3A.1	Y46H3A.1b	2.20657	11.0628	10.6855	8.76064	12.8753	18.6437	1	0.744206	0.426725	0.631721	1.67505	NA
WBGene00015627		C09B9.2	C09B9.2	72.8167	28.7634	19.59	48.6702	127.763	26.1012	1	0.744024	0.283611	1.1497	1.67484	NA
WBGene00001863	him-4	F15G9.4	F15G9.4d	3222.69	2076.5	2663.35	4131.13	3393.15	5811.25	0.0143497	0.744017	0.00129042	10.3562	1.67483	1.84316
WBGene00007560		C14A4.9	C14A4.9	158.873	120.585	99.7309	131.41	345.654	157.54	0.216483	0.743962	0.0659803	3.38029	1.67477	0.664576
WBGene00011612		T08D2.7	T08D2.7	112.535	97.353	101.512	168.399	132.715	219.996	0.070308	0.743818	0.0126054	6.22366	1.6746	1.153
WBGene00013479		Y69H2.1	Y69H2.1a	16.5492	19.9131	17.8091	50.617	18.8178	21.4403	1	0.74369	0.250795	1.31887	1.67445	NA
WBGene00016422	noah-1	C34G6.6	C34G6.6c	2063.14	523.272	1645.56	1664.52	3170.31	2250.3	0.465434	0.743411	0.220911	1.49844	1.67413	0.332142
WBGene00004219	ptr-4	C45B2.7	C45B2.7	692.862	216.832	472.831	492.543	1217.22	604.989	0.225809	0.743392	0.0706712	3.26736	1.67411	0.64626
WBGene00009968	fig-1	F53B7.5	F53B7.5b	397.182	276.571	543.177	611.298	619.007	809.138	0.0375662	0.743356	0.00509911	7.84395	1.67407	1.4252
WBGene00001605	gln-4	T25C8.3	Pseudogene:T25C8.3	11.0328	4.42514	6.23318	5.84043	26.7411	3.72875	1	0.743036	0.491687	0.472833	1.67369	NA
WBGene00015469		C05D2.8	C05D2.8	2448.18	2628.53	2280.45	4123.34	4415.25	3772.56	1.55508e-06	0.742942	1.20403e-08	32.4804	1.67359	5.80825
WBGene00021165		Y5H2B.3	Y5H2B.3	12.1361	6.63771	0.890455	8.76064	7.92329	15.8472	1	0.742912	0.500093	0.45474	1.67355	NA
WBGene00011911		T22B3.3	T22B3.3	152.253	56.4205	27.6041	103.181	251.564	40.084	0.537163	0.742731	0.281778	1.1585	1.67334	0.269894
WBGene00077683		cTel3X.1	cTel3X.1	3.30985	1.10628	0.890455	1.94681	5.94247	0.932187	1	0.742311	0.670318	0.18123	1.67285	NA
WBGene00011176		R09E10.6	R09E10.6	430.28	144.923	131.787	359.186	697.25	125.845	0.636635	0.742078	0.384994	0.754694	1.67258	0.196109
WBGene00013157		Y53F4B.10	Y53F4B.10	6.6197	8.85027	0.890455	12.6543	6.93288	7.4575	1	0.742039	0.512312	0.429342	1.67254	NA
WBGene00005643	srp-2	C05E4.1	C05E4.1.2	436.9	422.601	368.648	753.415	677.441	621.769	0.000629471	0.742011	1.81533e-05	18.3738	1.67251	3.20102
WBGene00019540		K08D12.6	K08D12.6	135427	55278.8	51889.5	147548	139941	118120	0.315608	0.741543	0.118108	2.44223	1.67196	0.500853
WBGene00022104	acsd-1	Y71D11A.3	Y71D11A.3a	141.22	138.286	141.582	252.112	237.699	214.403	0.0110032	0.741487	0.000890974	11.0414	1.6719	1.95848
WBGene00019722		M02A10.1	M02A10.1	9.92955	14.3817	5.34273	10.7074	20.7986	17.7116	1	0.741052	0.356775	0.849215	1.67139	NA
WBGene00012492	fbxb-7	Y20C6A.2	Y20C6A.2	184.248	246.701	212.819	382.548	327.826	365.417	0.00707065	0.741031	0.000471604	12.2247	1.67137	2.15054
WBGene00018134		F37A4.4	F37A4.4	131.291	50.8891	32.0564	84.6862	232.747	40.084	0.519252	0.740722	0.265513	1.23978	1.67101	0.284622
WBGene00017218	dct-5	F07F6.5	F07F6.5	57.3707	54.2079	33.8373	38.9362	186.197	17.7116	0.572779	0.740649	0.315885	1.00591	1.67093	0.242013
WBGene00022591	cuti-1	ZC328.1	ZC328.1	152.253	105.097	90.8264	129.463	327.826	123.981	0.255381	0.74031	0.085683	2.95367	1.67054	0.592812
WBGene00194910		ZC404.15	ZC404.15	11.0328	22.1257	8.90455	26.2819	29.7123	13.9828	1	0.7403	0.30273	1.06213	1.67052	NA
WBGene00000083	adt-2	F08C6.1	F08C6.1c.2	1448.61	1084.16	1382.88	2219.36	1865.93	2456.31	0.000887428	0.740256	2.75554e-05	17.5794	1.67047	3.05187
WBGene00004225	ptr-11	F56C11.2	F56C11.2a	579.223	354.011	451.461	616.165	936.929	759.733	0.0211761	0.740123	0.00228516	9.30511	1.67032	1.67415
WBGene00006418	tag-38	B0222.4	B0222.4	140.117	185.856	140.692	281.314	245.622	251.691	0.0177054	0.740107	0.0017507	9.79413	1.6703	1.75189
WBGene00019101		F59B1.10	F59B1.10	47.4412	103.991	73.0173	99.2872	117.859	157.54	0.196781	0.740084	0.0576325	3.60424	1.67027	0.706016
WBGene00010869		M05B5.1	M05B5.1	95.9856	16.5943	24.9327	57.4309	150.543	21.4403	0.598544	0.739993	0.343949	0.895656	1.67017	0.222904
WBGene00016800		C50C3.2	C50C3.2	68.4035	24.3383	18.6995	43.8032	114.888	27.0334	1	0.739926	0.285988	1.13841	1.67009	NA
WBGene00004235	ptr-21	Y65B4BR.3	Y65B4BR.3	1970.46	1309.84	1470.14	2813.14	2550.31	2569.11	0.00113702	0.739912	3.86983e-05	16.9342	1.67007	2.94423
WBGene00009075		F23B2.7	F23B2.7a	36.4083	22.1257	11.5759	22.3883	84.185	10.2541	1	0.739878	0.370766	0.801097	1.67003	NA
WBGene00013410	fbxb-94	Y63D3A.11	Pseudogene:Y63D3A.11	6.6197	3.31885	1.78091	6.81383	7.92329	4.66094	1	0.73957	0.53285	0.388954	1.66968	NA
WBGene00017405	bath-31	F12E12.4	F12E12.4	22.0657	27.6571	16.0282	36.9894	41.5973	30.7622	1	0.739374	0.163392	1.94255	1.66945	NA
WBGene00015057	gad-3	B0222.9	B0222.9	666.383	650.495	761.339	1078.53	1107.28	1284.55	0.000124894	0.739038	2.33012e-06	22.3016	1.66906	3.90346
WBGene00007929	dmd-10	C34D1.1	C34D1.1	29.7886	14.3817	22.2614	36.016	36.6452	38.2197	1	0.738952	0.166994	1.90973	1.66896	NA
WBGene00138719		F26F2.10	F26F2.10a	31.9952	14.3817	8.01409	7.78723	76.2617	6.52531	1	0.738715	0.464256	0.535615	1.66869	NA
WBGene00006947	wrt-1	ZK1290.12	ZK1290.12	301.196	111.735	193.229	235.564	480.349	295.503	0.194846	0.738618	0.05684	3.62727	1.66858	0.710308
WBGene00006163	str-112	F10D2.4	F10D2.4	1.10328	6.63771	8.90455	9.73404	9.90411	8.38968	1	0.738543	0.490509	0.475409	1.66849	NA
WBGene00021008		W03F11.5	W03F11.5	28.6854	25.4445	26.7136	34.0691	48.5302	52.2025	1	0.738191	0.118916	2.43155	1.66808	NA
WBGene00019975	flp-34	R09A1.5	R09A1.5	58.474	77.4399	105.964	170.346	99.0411	135.167	0.162576	0.738167	0.0438138	4.06372	1.66806	0.788944
WBGene00023416	spi-1	R10H1.4	R10H1.4	44.1313	59.7393	36.5086	38.9362	162.427	32.6266	0.498498	0.737871	0.247299	1.3385	1.66771	0.302337
WBGene00001099	dsc-4	K02D7.4	K02D7.4	3892.38	2484.71	3376.6	4855.34	5177.87	6231.67	0.00271337	0.737713	0.000126957	14.6864	1.66753	2.56649
WBGene00002983	lgx-1	C54G7.3	C54G7.3a	453.449	109.522	292.96	275.473	757.665	394.315	0.312008	0.737686	0.116006	2.47043	1.6675	0.505834
WBGene00017189		F07B7.8	F07B7.8a	2.20657	3.31885	2.67136	6.81383	5.94247	0.932187	1	0.737536	0.605293	0.267087	1.66733	NA
WBGene00010433		H40L08.1	H40L08.1	1533.56	1243.46	1426.51	2224.23	2032.32	2751.82	0.00048149	0.737503	1.29702e-05	19.0149	1.66729	3.31741
WBGene00020353		T08B6.4	T08B6.4	364.083	67.4833	81.9218	181.053	585.333	89.49	0.709154	0.737371	0.477059	0.505579	1.66714	0.149259
WBGene00013070		Y51A2B.6	Y51A2B.6	7.72298	1.10628	1.78091	6.81383	8.9137	1.86437	1	0.737233	0.593769	0.284496	1.66698	NA
WBGene00008489	srb-17	F01D4.7	F01D4.7	5.51641	6.63771	11.5759	19.4681	13.8658	6.52531	1	0.736747	0.410499	0.677356	1.66641	NA
WBGene00007182	fbxb-119	B0462.3	B0462.3	12.1361	40.9325	18.6995	43.8032	48.5302	27.0334	1	0.73666	0.237736	1.39397	1.66631	NA
WBGene00016540		C39F7.5	C39F7.5	219.553	207.981	269.808	394.229	365.462	403.637	0.00489232	0.736066	0.000280542	13.196	1.66563	2.31049
WBGene00012145	nlp-46	T28H10.4	T28H10.4	4.41313	7.74399	16.0282	10.7074	21.789	14.915	1	0.735675	0.388347	0.744113	1.66518	NA
WBGene00022627		ZC513.2	ZC513.2	9.92955	12.1691	6.23318	6.81383	34.6644	5.59312	1	0.735554	0.454533	0.559324	1.66504	NA
WBGene00022833		ZK973.4	ZK973.4	16.5492	6.63771	3.56182	2.92021	39.6165	1.86437	1	0.735242	0.558591	0.342149	1.66468	NA
WBGene00017529		F16G10.15	F16G10.15	14.3427	12.1691	12.4664	21.4149	25.7507	17.7116	1	0.735203	0.256131	1.28955	1.66463	NA
WBGene00012851		Y44A6C.2	Y44A6C.2	45.2346	51.9954	22.2614	87.6064	73.2904	37.2875	1	0.734956	0.159823	1.9759	1.66435	NA
WBGene00010917		M110.9	M110.9	22.0657	17.7005	8.90455	8.76064	50.511	21.4403	1	0.734891	0.360812	0.835065	1.66427	NA
WBGene00001760	gst-12	F37B1.2	F37B1.2	65.0937	92.9279	78.36	129.463	108.945	154.743	0.0990891	0.734654	0.0204987	5.36892	1.664	1.00397
WBGene00044777		T02B11.9	T02B11.9	22.0657	11.0628	7.12364	17.5213	45.5589	3.72875	1	0.734586	0.44288	0.588809	1.66392	NA
WBGene00010786		K12D12.4	K12D12.4	27.5821	18.8068	19.59	21.4149	58.4343	29.83	1	0.734142	0.225559	1.46865	1.66341	NA
WBGene00020157		T02B11.6	T02B11.6	22.0657	34.2948	29.385	54.5106	40.6069	47.5415	1	0.734043	0.114924	2.48516	1.66329	NA
WBGene00004890	smp-2	D1037.2	D1037.2	1023.85	695.853	988.405	1444.53	1317.25	1742.26	0.00453679	0.733648	0.000253569	13.3856	1.66284	2.34325
WBGene00012186	mlt-11	W01F3.3	W01F3.3d	1540.18	313.078	1077.45	916.947	2096.7	1857.85	0.551982	0.733084	0.296569	1.08956	1.66219	0.258075
WBGene00003431	msp-33	R05F9.8	R05F9.8	649.834	165.943	116.65	427.324	994.373	127.71	0.710988	0.732868	0.478761	0.501684	1.66194	0.148138
WBGene00045356		T03E6.9	T03E6.9	6.6197	2.21257	1.78091	10.7074	4.95206	1.86437	1	0.732562	0.58471	0.298681	1.66159	NA
WBGene00016319		C32D5.12	C32D5.12	71.7134	87.3964	94.3882	123.622	189.169	109.066	0.127223	0.732438	0.0301767	4.6992	1.66144	0.895436
WBGene00013170		Y53F4B.24	Y53F4B.24	45.2346	8.85027	16.0282	36.016	65.3671	14.915	1	0.732032	0.348323	0.879558	1.66098	NA
WBGene00021084		W08E12.3	W08E12.3	62.8871	7.74399	24.0423	29.2021	82.2041	45.6772	1	0.732022	0.320928	0.985159	1.66097	NA
WBGene00016797		C50A2.3	C50A2.3a	755.749	621.732	632.223	1229.41	1069.64	1037.52	0.000280882	0.731781	6.41097e-06	20.3614	1.66069	3.55148
WBGene00005602	srj-14	C03G6.3	C03G6.3b	44.1313	43.1451	28.4945	69.1117	51.5014	70.8462	1	0.731568	0.0834878	2.99566	1.66044	NA
WBGene00018647		F49F1.7	F49F1.7a	77.2298	77.4399	78.36	129.463	111.916	145.421	0.0675204	0.731375	0.0119259	6.32185	1.66022	1.17056
WBGene00220259		ZK418.13	ZK418.13	79.4364	45.3577	70.3459	90.5266	139.648	94.1509	0.184726	0.731183	0.0528999	3.74708	1.66	0.733473
WBGene00017673	icmt-1	F21F3.3	F21F3.3	70.6101	8.85027	15.1377	39.9096	101.022	15.8472	1	0.731178	0.395093	0.723209	1.65999	NA
WBGene00008922		F17C11.11	F17C11.11a	449.036	927.066	669.622	1282.95	1110.25	1002.1	0.0336873	0.73096	0.00440198	8.11008	1.65974	1.47253
WBGene00013505		Y71A12B.8	Y71A12B.8	5.51641	5.53142	3.56182	9.73404	6.93288	7.4575	1	0.730854	0.474339	0.511851	1.65962	NA
WBGene00018840		F54H5.3	F54H5.3	18.7558	13.2754	14.2473	23.3617	36.6452	16.7794	1	0.730685	0.258286	1.27792	1.65943	NA
WBGene00013946		ZK228.3	ZK228.3	1038.19	1151.64	902.921	1898.14	1755.01	1476.58	0.000486048	0.730525	1.31322e-05	18.9912	1.65924	3.31332
WBGene00003424	msp-3	F26G1.7	F26G1.7	477.721	120.585	89.0455	322.197	736.866	81.1003	0.718407	0.730384	0.490468	0.4755	1.65908	0.14363
WBGene00043743		Y59E9AL.2	Y59E9AL.2	423.661	139.392	124.664	323.17	697.25	120.252	0.645469	0.730278	0.397672	0.715353	1.65896	0.190124
WBGene00017713		F22E5.20	F22E5.20	30.8919	54.2079	16.0282	61.3245	50.511	54.999	1	0.730004	0.174716	1.84201	1.65864	NA
WBGene00016461		C35E7.9	C35E7.9	100.399	32.0822	33.8373	68.1383	183.226	24.2369	0.555913	0.729915	0.300888	1.07025	1.65854	0.254993
WBGene00019564		K09D9.1	K09D9.1	50.751	58.6331	48.975	103.181	58.4343	100.676	0.2037	0.729883	0.0606877	3.51849	1.6585	0.69101
WBGene00012627		Y38H6C.15	Y38H6C.15	41.9247	4.42514	11.5759	19.4681	63.3863	13.0506	1	0.729741	0.428007	0.628227	1.65834	NA
WBGene00020713		T23B3.5	T23B3.5	439.107	103.991	73.9077	236.537	684.374	101.608	0.717572	0.729094	0.489144	0.478408	1.6576	0.144135
WBGene00013192		Y54E2A.7	Y54E2A.7	47.4412	15.488	7.12364	29.2021	77.2521	9.32187	1	0.729044	0.413739	0.668031	1.65754	NA
WBGene00022162		Y71G12B.27	Y71G12B.27	67.3003	14.3817	11.5759	36.016	108.945	9.32187	1	0.72892	0.419357	0.652118	1.6574	NA
WBGene00008724		F13A7.1	F13A7.1	112.535	42.0388	13.3568	63.2713	175.303	39.1519	0.579941	0.728827	0.323481	0.974818	1.65729	0.236616
WBGene00009743	sptf-1	F45H11.1	F45H11.1b	60.6806	68.5896	52.5368	100.261	94.0891	106.269	0.10994	0.728721	0.024082	5.08872	1.65717	0.958844
WBGene00004751	sea-2	K10G6.3	K10G6.3e	118.051	21.0194	85.4836	61.3245	86.1658	224.657	0.50006	0.728617	0.248477	1.33185	1.65705	0.300978
WBGene00007308		C04G2.9	C04G2.9	1162.86	274.358	211.928	831.287	1665.87	234.911	0.707108	0.728399	0.474708	0.510997	1.6568	0.150514
WBGene00013713		Y106G6G.4	Y106G6G.4	223.966	56.4205	59.6605	136.277	373.385	53.1347	0.531416	0.72782	0.276402	1.1847	1.65614	0.274565
WBGene00008681	scrm-4	F11A6.2	F11A6.2	171.009	207.981	196.79	303.702	283.258	366.35	0.0119095	0.727429	0.000996059	10.8349	1.65569	1.92411
WBGene00044388		C27D6.11	C27D6.11	97.0889	24.3383	23.1518	51.5904	177.284	10.2541	0.645369	0.727331	0.397246	0.716648	1.65557	0.190192
WBGene00012917		Y46G5A.29	Y46G5A.29	294.577	150.455	118.43	188.84	561.563	181.777	0.331579	0.727222	0.127427	2.32357	1.65545	0.479413
WBGene00019973		R09A1.3	R09A1.3	140.117	153.773	119.321	249.191	227.795	206.013	0.0231834	0.727155	0.00256099	9.0965	1.65537	1.63482
WBGene00202513		ZK938.10	ZK938.10	2.20657	1.10628	3.56182	2.92021	2.97123	5.59312	1	0.726996	0.619017	0.247252	1.65519	NA
WBGene00005375	srh-159	F40D4.3	F40D4.3	1.10328	1.10628	1.78091	0.973404	0.990411	4.66094	1	0.726639	0.701175	0.147252	1.65478	NA
WBGene00009824	gpdh-1	F47G4.3	F47G4.3	279.131	362.861	371.32	593.777	570.477	513.635	0.0033419	0.726351	0.000169265	14.1448	1.65445	2.47601
WBGene00014933		Y60A3A.11	Pseudogene:Y60A3A.11	38.6149	39.8262	42.7418	62.2979	70.3192	68.0497	1	0.726204	0.053521	3.72758	1.65428	NA
WBGene00017175	irld-3	F02C9.4	F02C9.4	39.7182	12.1691	8.01409	30.1755	56.4534	12.1184	1	0.726201	0.377729	0.778079	1.65428	NA
WBGene00005513	sri-1	F36G9.8	F36G9.8	5.51641	7.74399	7.12364	12.6543	9.90411	11.1862	1	0.72613	0.403426	0.698092	1.6542	NA
WBGene00020707	wago-10	T22H9.3	T22H9.3	145.633	15.488	20.4805	52.5638	213.929	33.5587	0.643965	0.726118	0.393942	0.726739	1.65418	0.191137
WBGene00001806	gur-5	ZK622.2	ZK622.2	22.0657	21.0194	26.7136	27.2553	45.5589	42.8806	1	0.725877	0.161533	1.95982	1.65391	NA
WBGene00007480	glna-1	C09F9.3	C09F9.3c	403.802	290.953	385.567	588.91	598.208	600.329	0.00290875	0.725659	0.000139819	14.5046	1.65366	2.53629
WBGene00219636	linc-81	Y116F11B.26	WBGene00219636	11.0328	14.3817	10.6855	14.6011	18.8178	26.1012	1	0.72516	0.294758	1.09776	1.65308	NA
WBGene00219659	anr-36	C37C3.15	C37C3.15	9.92955	14.3817	4.45227	13.6277	14.8562	18.6437	1	0.72492	0.37243	0.795542	1.65281	NA
WBGene00077697		F58E6.13	F58E6.13c	233.896	139.392	64.1127	105.128	530.86	86.6934	0.68245	0.724879	0.442032	0.591002	1.65276	0.165929
WBGene00013489	col-42	Y69H2.14	Y69H2.14	39692.8	28584.2	19945.3	52387.6	48720.3	44676.9	0.0146203	0.724657	0.00132586	10.3062	1.65251	1.83504
WBGene00008896		F16H6.6	F16H6.6	2.20657	4.42514	4.45227	7.78723	5.94247	4.66094	1	0.724249	0.535389	0.384152	1.65204	NA
WBGene00017664	npax-1	F21D12.5	F21D12.5	9.92955	14.3817	6.23318	15.5745	16.837	17.7116	1	0.724165	0.337677	0.919231	1.65194	NA
WBGene00018256	cutl-28	F41A4.1	F41A4.1	44.1313	15.488	22.2614	49.6436	57.4439	27.9656	1	0.723664	0.220218	1.50295	1.65137	NA
WBGene00008967		F20B10.3	F20B10.3.2	80.5396	18.8068	52.5368	37.9628	148.562	64.3209	0.507379	0.723054	0.255152	1.29487	1.65067	0.294667
WBGene00235279		Y67D8C.22	Y67D8C.22a	2.20657	9.95656	10.6855	11.6809	18.8178	7.4575	1	0.722984	0.453078	0.562941	1.65059	NA
WBGene00206469		F58D2.5	F58D2.5	5.51641	12.1691	5.34273	17.5213	12.8753	7.4575	1	0.722804	0.423034	0.641872	1.65039	NA
WBGene00008708		F11E6.4	F11E6.4a	43.028	67.4833	41.8514	77.8723	105.974	67.1175	0.231138	0.722368	0.0735454	3.20206	1.64989	0.636129
WBGene00017467		F14F9.4	F14F9.4	173.215	214.619	192.338	338.745	357.538	261.012	0.0175571	0.722186	0.00172959	9.81644	1.64968	1.75555
WBGene00010091	ssp-35	F55C5.1	F55C5.1	164.389	51.9954	32.0564	91.5	268.401	49.4059	0.544361	0.722088	0.288842	1.12501	1.64957	0.264113
WBGene00021977		Y58A7A.3	Y58A7A.3	800.983	860.689	715.035	1442.59	1311.3	1164.3	0.000248492	0.721829	5.55144e-06	20.6369	1.64927	3.60469
WBGene00010069		F54F11.1	F54F11.1	13.2394	5.53142	8.01409	12.6543	10.8945	20.5081	1	0.721599	0.383431	0.759672	1.64901	NA
WBGene00018844		F54H12.4	F54H12.4	2.20657	6.63771	6.23318	0.973404	10.8945	13.0506	1	0.721599	0.559862	0.339942	1.64901	NA
WBGene00006603	tps-2	F19H8.1	F19H8.1a	2430.53	1536.63	2110.38	3325.15	3296.09	3400.62	0.00189535	0.721501	7.76544e-05	15.6146	1.6489	2.72231
WBGene00008302		C54D10.8	C54D10.8a	7.72298	3.31885	3.56182	6.81383	5.94247	11.1862	1	0.721468	0.499096	0.456857	1.64886	NA
WBGene00018990	klf-1	F56F11.3	F56F11.3.1	765.678	588.543	759.558	1067.82	1090.44	1327.43	0.00156158	0.72125	5.98236e-05	16.1082	1.64861	2.80643
WBGene00013656		Y105C5B.17	Y105C5B.17	24.2722	5.53142	5.34273	14.6011	35.6548	7.4575	1	0.721038	0.451514	0.56685	1.64837	NA
WBGene00003497	mup-4	K07D8.1	K07D8.1	5691.84	3644.1	5017.71	7129.21	7464.73	9064.59	0.00312601	0.720917	0.000155809	14.3007	1.64823	2.50501
WBGene00014229		ZK1128.3	ZK1128.3	38.6149	37.6137	28.4945	36.9894	100.032	35.4231	1	0.720853	0.194402	1.68394	1.64816	NA
WBGene00004958	spe-4	ZK524.1	ZK524.1	92.6758	36.5074	37.3991	56.4574	185.207	32.6266	0.529109	0.720616	0.274348	1.19488	1.64789	0.276455
WBGene00219917		F26D10.24	F26D10.24	2.20657	3.31885	2.67136	0.973404	6.93288	5.59312	1	0.72046	0.613151	0.255613	1.64771	NA
WBGene00021871	dml-1	Y54G2A.5	Y54G2A.5b	26.4788	7.74399	12.4664	21.4149	38.626	16.7794	1	0.720438	0.327922	0.957086	1.64768	NA
WBGene00010360	fbxa-96	H03G16.4	H03G16.4	6.6197	4.42514	0.890455	2.92021	11.8849	4.66094	1	0.720354	0.580296	0.305756	1.64759	NA
WBGene00000670	col-95	Y41C4A.16	Y41C4A.16	42768.8	35423.2	38871	58141.4	52344.2	82371.8	0.00265301	0.720255	0.000121447	14.7701	1.64747	2.57626
WBGene00004932	sod-3	C08A9.1	C08A9.1	158.873	148.242	130.897	253.085	230.766	236.776	0.0146648	0.720248	0.00133177	10.298	1.64747	1.83372
WBGene00013507		Y71A12B.10	Y71A12B.10b	31.9952	46.4639	16.9186	72.0319	38.626	45.6772	1	0.719902	0.18873	1.7275	1.64707	NA
WBGene00004227	ptr-13	K07C10.1	K07C10.1	1063.56	848.52	982.172	1555.5	1615.36	1595.9	4.43246e-05	0.719677	6.24763e-07	24.8343	1.64681	4.35336
WBGene00011895		T21C9.9	T21C9.9	233.896	63.0582	92.6073	73.0053	471.436	96.9475	0.694195	0.719534	0.457646	0.551646	1.64665	0.158519
WBGene00044227		C07A9.13	C07A9.13	13.2394	4.42514	7.12364	10.7074	19.8082	10.2541	1	0.719496	0.413913	0.667533	1.64661	NA
WBGene00008460		E02H4.2	E02H4.2	54.0609	44.2514	54.3177	94.4202	72.3	84.829	0.158326	0.71949	0.0419597	4.13683	1.6466	0.800449
WBGene00206366		C03H5.9	C03H5.9	2.20657	2.21257	8.90455	15.5745	1.98082	4.66094	1	0.719195	0.580255	0.305822	1.64626	NA
WBGene00021434		Y39A3A.3	Y39A3A.3	7.72298	9.95656	5.34273	12.6543	13.8658	11.1862	1	0.719171	0.390944	0.736005	1.64624	NA
WBGene00138711		R07B1.13	R07B1.13	43.028	37.6137	20.4805	25.3085	111.916	28.8978	1	0.718784	0.28679	1.13463	1.64579	NA
WBGene00000563	cng-3	F38E11.12	F38E11.12	3.30985	4.42514	10.6855	7.78723	7.92329	14.915	1	0.71863	0.472086	0.517088	1.64562	NA
WBGene00021716	fbxb-112	Y49F6B.3	Y49F6B.3	3.30985	3.31885	6.23318	4.86702	10.8945	5.59312	1	0.718549	0.521126	0.411665	1.64553	NA
WBGene00010563		K04G2.4	K04G2.4	154.46	63.0582	46.3036	109.995	268.401	54.999	0.481212	0.717709	0.232514	1.42542	1.64457	0.317664
WBGene00009684	msd-3	F44D12.7	F44D12.7	284.647	68.5896	72.1268	215.122	418.944	65.2531	0.687318	0.717664	0.448511	0.574411	1.64452	0.162842
WBGene00044444		F09G8.10	F09G8.10a	4.41313	14.3817	7.12364	14.6011	14.8562	13.0506	1	0.717614	0.395411	0.722236	1.64446	NA
WBGene00012223		W03C9.8	W03C9.8	15.446	4.42514	3.56182	5.84043	30.7028	1.86437	1	0.717354	0.552599	0.352681	1.64416	NA
WBGene00010377	nspa-1	H12D21.1	H12D21.1	71.7134	24.3383	15.1377	45.75	119.84	16.7794	1	0.716716	0.356735	0.849355	1.64344	NA
WBGene00013888	nspa-3	ZC412.7	ZC412.7	71.7134	24.3383	15.1377	45.75	119.84	16.7794	1	0.716716	0.356735	0.849355	1.64344	NA
WBGene00016286		C31H1.1	C31H1.1	56.2674	17.7005	16.0282	22.3883	116.869	8.38968	1	0.715927	0.426208	0.633135	1.64254	NA
WBGene00017473		F14H12.6	F14H12.6	37.5116	32.0822	41.8514	69.1117	57.4439	56.8634	1	0.715748	0.0754652	3.15996	1.64233	NA
WBGene00010719		K09E4.1	K09E4.1	93.779	18.8068	17.8091	50.617	124.792	38.2197	0.580555	0.715258	0.324915	0.969058	1.64178	0.236156
WBGene00014141		ZK899.2	ZK899.2	1359.24	1233.51	1273.35	2142.46	2155.13	2048.02	6.27296e-07	0.714929	4.08527e-09	34.5827	1.6414	6.20253
WBGene00016288		C31H1.5	C31H1.5	101.502	36.5074	24.0423	72.0319	166.389	27.0334	0.563186	0.714299	0.306916	1.0439	1.64069	0.249348
WBGene00008657	clec-154	F10F2.5	Pseudogene:F10F2.5	15.446	1.10628	0.890455	1.94681	22.7795	3.72875	1	0.713967	0.625522	0.238182	1.64031	NA
WBGene00008693		F11C1.4	F11C1.4	6.6197	11.0628	27.6041	20.4415	23.7699	30.7622	1	0.713917	0.332094	0.940714	1.64025	NA
WBGene00021016		W03G9.5	W03G9.5	7.72298	4.42514	6.23318	8.76064	15.8466	5.59312	1	0.71375	0.464318	0.535466	1.64006	NA
WBGene00016933		C54G7.1	C54G7.1	5.51641	8.85027	6.23318	7.78723	12.8753	13.0506	1	0.713452	0.422287	0.643943	1.63972	NA
WBGene00020007		R11F4.1	R11F4.1.2	934.481	753.38	656.265	1240.12	1279.61	1320.91	0.00116725	0.713282	4.03581e-05	16.8545	1.63953	2.93284
WBGene00077450		K06B4.15	K06B4.15	22.0657	14.3817	8.01409	12.6543	54.4726	5.59312	1	0.71312	0.443808	0.586418	1.63935	NA
WBGene00007632		C16C10.13	C16C10.13.1	3.30985	11.0628	5.34273	12.6543	16.837	2.79656	1	0.713014	0.506174	0.441968	1.63923	NA
WBGene00005399	srh-184	D1054.12	D1054.12	3.30985	1.10628	0.890455	0.973404	2.97123	4.66094	1	0.712749	0.677867	0.172536	1.63892	NA
WBGene00021471		Y39G10AR.15	Y39G10AR.15	66.197	18.8068	25.8232	45.75	102.012	33.5587	1	0.712157	0.266063	1.23693	1.63825	NA
WBGene00018416	retr-1	F44E2.2	F44E2.2a	1939.57	1778.9	1878.86	4083.43	2048.17	3036.13	0.0199132	0.711836	0.00207178	9.48483	1.63789	1.70086
WBGene00018133		F37A4.3	F37A4.3	35.3051	34.2948	32.0564	36.9894	77.2521	52.2025	1	0.711825	0.129833	2.2945	1.63787	NA
WBGene00019430		K06A5.2	K06A5.2	343.121	147.136	109.526	283.261	608.113	90.4222	0.649183	0.711303	0.402167	0.701837	1.63728	0.187633
WBGene00022020	hpo-39	Y61A9LA.9	Y61A9LA.9	31.9952	15.488	26.7136	39.9096	41.5973	40.084	1	0.710754	0.167166	1.90818	1.63666	NA
WBGene00016080		C24H12.11	Pseudogene:C24H12.11	2.20657	9.95656	6.23318	15.5745	9.90411	4.66094	1	0.710691	0.499628	0.455726	1.63659	NA
WBGene00007807		C29F3.7	C29F3.7a	1881.1	2326.52	2601.02	3752.47	3808.13	3585.19	0.000207519	0.710666	4.33482e-06	21.1108	1.63656	3.68294
WBGene00003071	lrp-1	F29D11.1	F29D11.1	1440.89	831.926	1495.96	1772.57	1823.35	2572.84	0.0331337	0.710589	0.00430173	8.15185	1.63647	1.47973
WBGene00007851	clec-245	C31G12.2	C31G12.2	17.6525	16.5943	24.9327	38.9362	23.7699	34.4909	1	0.710467	0.206479	1.59595	1.63633	NA
WBGene00000022	abt-4	Y39D8C.1	Y39D8C.1	1802.76	1126.2	1664.26	2640.85	2216.54	2659.53	0.00591083	0.710452	0.000365643	12.7001	1.63632	2.22835
WBGene00016612		C43G2.3	C43G2.3a	48.5444	36.5074	16.0282	38.9362	115.878	10.2541	1	0.710062	0.370998	0.800319	1.63587	NA
WBGene00009692		F44E5.5	F44E5.5	81.6429	42.0388	98.8405	44.7766	207.986	111.862	0.438805	0.71006	0.197974	1.65726	1.63587	0.357728
WBGene00017892		F28B4.3	F28B4.3.2	16879.1	9675.56	13398.7	20774.4	19427.9	25145.7	0.00906252	0.709831	0.000664608	11.5857	1.63561	2.04275
WBGene00021821		Y54B9A.1	Y54B9A.1	3.30985	3.31885	6.23318	6.81383	6.93288	7.4575	1	0.709305	0.513684	0.426555	1.63502	NA
WBGene00007274		C03C11.1	C03C11.1	54.0609	6.63771	8.01409	30.1755	77.2521	4.66094	1	0.708838	0.489878	0.476795	1.63449	NA
WBGene00004395	rol-3	C16D9.2	C16D9.2	281.337	170.368	322.345	373.787	391.212	501.517	0.0616799	0.708742	0.010458	6.55517	1.63438	1.20986
WBGene00000668	col-93	W05B2.5	W05B2.5	146061	76211.9	71998.6	181892	157310	141731	0.0388252	0.708692	0.00539212	7.743	1.63432	1.41089
WBGene00015886		C17B7.12	C17B7.12	1.10328	1.10628	5.34273	3.89362	4.95206	3.72875	1	0.706952	0.627624	0.235296	1.63235	NA
WBGene00021048		W05H9.1	W05H9.1a.2	2384.19	2366.34	2276.89	3827.43	3727.91	3911.46	1.94891e-08	0.706559	7.85916e-11	42.2925	1.63191	7.71021
WBGene00020265	fbxa-196	T05H4.2	T05H4.2	18.7558	6.63771	5.34273	13.6277	31.6932	4.66094	1	0.706321	0.470221	0.521457	1.63164	NA
WBGene00011462	vap-2	T05A10.5	T05A10.5	158.873	74.121	83.7027	129.463	287.219	99.744	0.336015	0.706195	0.129849	2.29431	1.6315	0.473641
WBGene00219972		F55A3.8	F55A3.8	1.10328	2.21257	0.890455	2.92021	2.97123	0.932187	1	0.706167	0.699342	0.149157	1.63146	NA
WBGene00020987		W03D8.5	W03D8.5	35.3051	4.42514	5.34273	26.2819	37.6356	9.32187	1	0.705795	0.463075	0.538452	1.63104	NA
WBGene00195190		T04A6.5	T04A6.5	584.74	347.373	384.676	658.021	677.441	811.003	0.0244039	0.705751	0.00276928	8.95357	1.63099	1.61254
WBGene00003449	msp-56	K07F5.3	K07F5.3	575.914	149.348	138.911	363.08	906.226	139.828	0.702776	0.705621	0.468234	0.52614	1.63085	0.153183
WBGene00011582	ntr-1	T07D10.2	T07D10.2	9.92955	8.85027	15.1377	18.4947	11.8849	25.1691	1	0.705607	0.339423	0.912609	1.63083	NA
WBGene00016351		C33F10.1	C33F10.1	258.168	73.0148	55.2082	149.904	423.896	55.9312	0.712902	0.705151	0.482052	0.494216	1.63031	0.14697
WBGene00007156		B0379.2	B0379.2	47.4412	26.5508	14.2473	25.3085	108.945	9.32187	1	0.704697	0.40557	0.69175	1.6298	NA
WBGene00016058	nspd-3	C24D10.7	C24D10.7.2	353.051	87.3964	49.8655	206.362	530.86	61.5244	0.739902	0.704437	0.521933	0.410072	1.62951	0.130826
WBGene00004264	qua-1	T05C12.10	T05C12.10	759.059	209.088	406.047	400.069	1290.51	548.126	0.578095	0.704102	0.321431	0.983115	1.62913	0.238001
WBGene00009471		F36D3.5	F36D3.5	69.5068	27.6571	18.6995	27.2553	141.629	19.5759	1	0.703985	0.374234	0.789556	1.629	NA
WBGene00012940		Y47D3B.3	Y47D3B.3	5.51641	5.53142	9.795	6.81383	21.789	5.59312	1	0.703787	0.479502	0.499995	1.62877	NA
WBGene00020070	rmd-6	R13H9.1	R13H9.1	75.0232	32.0822	12.4664	56.4574	124.792	13.0506	1	0.703381	0.384015	0.757809	1.62832	NA
WBGene00045468		F08A8.8	F08A8.8	34.2018	39.8262	14.2473	35.0426	59.4247	48.4737	1	0.703286	0.205014	1.60629	1.62821	NA
WBGene00015044	cyp-34A9	B0213.15	B0213.15b	1621.83	2325.41	2495.94	2669.07	3712.06	4110.95	0.0141308	0.703256	0.00126276	10.3962	1.62818	1.84983
WBGene00007763		C27B7.6	C27B7.6	55.1641	19.9131	12.4664	42.8298	89.137	10.2541	1	0.703199	0.389056	0.741889	1.62811	NA
WBGene00020990		W03D8.9	W03D8.9.1	461.172	112.841	86.3741	323.17	637.825	113.727	0.701584	0.702919	0.466221	0.530918	1.62779	0.15392
WBGene00013524		Y73F8A.15	Y73F8A.15	17.6525	3.31885	4.45227	8.76064	29.7123	2.79656	1	0.702864	0.537213	0.38073	1.62773	NA
WBGene00002915	let-805	H19M22.2	H19M22.2d	3962.99	1971.4	3717.65	3887.78	4093.37	7729.7	0.102236	0.702811	0.0215208	5.28412	1.62767	0.990395
WBGene00010928	clec-258	M162.2	M162.2	5.51641	9.95656	7.12364	6.81383	17.8274	12.1184	1	0.702777	0.430679	0.620991	1.62763	NA
WBGene00012346		W08G11.1	W08G11.1	30.8919	12.1691	16.9186	18.4947	60.4151	18.6437	1	0.702398	0.334107	0.932915	1.62721	NA
WBGene00004008	pgp-14	F22E10.3	F22E10.3	985.232	491.19	601.057	1016.23	1436.1	927.526	0.0671008	0.702376	0.0117869	6.34265	1.62718	1.17327
WBGene00020593	ugt-11	T19H12.10	T19H12.10	152.253	202.45	139.801	300.782	258.497	244.233	0.0353198	0.70235	0.00469243	7.99432	1.62715	1.45198
WBGene00022246	acp-7	Y73B6BL.25	Y73B6BL.25	336.501	299.803	419.404	622.005	519.966	577.956	0.00684095	0.70226	0.000450215	12.3113	1.62705	2.16488
WBGene00010222		F57G12.2	F57G12.2b	19.8591	23.232	25.8232	35.0426	47.5397	29.83	1	0.702234	0.174298	1.84559	1.62702	NA
WBGene00010357		H03A11.2	H03A11.2	921.241	512.21	797.847	1259.59	1055.78	1315.32	0.0213846	0.702139	0.00231481	9.28149	1.62692	1.6699
WBGene00015664		C10A4.3	C10A4.3	11.0328	16.5943	18.6995	25.3085	31.6932	18.6437	1	0.701657	0.265798	1.23831	1.62637	NA
WBGene00006217	str-173	Y17G9A.1	Y17G9A.1	5.51641	5.53142	6.23318	7.78723	13.8658	6.52531	1	0.701629	0.46843	0.525676	1.62634	NA
WBGene00012757		Y41C4A.11	Y41C4A.11	159.976	122.798	117.54	216.096	233.737	200.42	0.0376245	0.701609	0.00515597	7.8239	1.62632	1.42453
WBGene00018163		F38A5.6	F38A5.6	37.5116	9.95656	7.12364	11.6809	71.3096	5.59312	1	0.701606	0.491603	0.473015	1.62631	NA
WBGene00021435		Y39A3A.4	Y39A3A.4	15.446	15.488	9.795	22.3883	27.7315	15.8472	1	0.700974	0.294041	1.10103	1.6256	NA
WBGene00016218		C29F9.3	C29F9.3b	385.046	584.118	505.778	825.447	812.137	759.733	0.00574821	0.700515	0.000350484	12.7793	1.62508	2.24047
WBGene00009849		F48F7.3	F48F7.3	3.30985	7.74399	6.23318	5.84043	14.8562	7.4575	1	0.700509	0.488755	0.479267	1.62508	NA
WBGene00000979	dhs-16	C10F3.2	C10F3.2	25.3755	7.74399	32.9468	17.5213	45.5589	44.745	1	0.700442	0.317921	0.997482	1.625	NA
WBGene00010900		M28.9	M28.9.1	155.563	58.6331	44.5227	99.2872	287.219	33.5587	0.562492	0.700415	0.306367	1.04627	1.62497	0.249884
WBGene00044796		W03D8.11	W03D8.11	33.0985	37.6137	25.8232	42.8298	60.4151	53.1347	1	0.700128	0.116631	2.46199	1.62465	NA
WBGene00045252		Y62H9A.15	Y62H9A.15b	105.915	150.455	105.074	192.734	249.584	144.489	0.115795	0.700116	0.0259906	4.95664	1.62464	0.936309
WBGene00021007		W03F11.4	W03F11.4	222.863	42.0388	46.3036	102.207	357.538	45.6772	0.737706	0.7001	0.518222	0.41743	1.62462	0.132117
WBGene00007522		C11E4.8	C11E4.8	8.82626	3.31885	8.01409	12.6543	10.8945	9.32187	1	0.700072	0.445199	0.582846	1.62459	NA
WBGene00009895	scl-2	F49E11.10	F49E11.10a	616.735	737.892	530.711	943.229	1028.05	1088.79	0.00200989	0.699924	8.39684e-05	15.4668	1.62442	2.69683
WBGene00021537		Y42H9AR.2	Y42H9AR.2	28.6854	14.3817	10.6855	19.4681	56.4534	11.1862	1	0.699914	0.378604	0.775229	1.62441	NA
WBGene00019174		H09G03.1	H09G03.1	35.3051	53.1016	34.7277	55.484	91.1178	53.1347	1	0.699802	0.11634	2.46591	1.62428	NA
WBGene00010593	gsnl-1	K06A4.3	K06A4.3	1279.81	1250.1	1251.98	2128.84	2009.54	2004.2	4.84694e-07	0.69978	2.89276e-09	35.2547	1.62426	6.31453
WBGene00018024		F35A5.1	F35A5.1	3724.68	1630.66	2561.84	3782.65	4095.35	4980.68	0.0510395	0.699719	0.00797763	7.03849	1.62419	1.29209
WBGene00015426		C04E6.12	Pseudogene:C04E6.12	7.72298	9.95656	4.45227	7.78723	14.8562	13.0506	1	0.699096	0.432636	0.615736	1.62349	NA
WBGene00219689	linc-41	F36A4.22	WBGene00219689	18.7558	14.3817	12.4664	12.6543	43.5781	17.7116	1	0.699062	0.337713	0.919092	1.62345	NA
WBGene00021223		Y19D10A.8	Y19D10A.8	27.5821	25.4445	31.1659	53.5372	38.626	44.745	1	0.698994	0.128783	2.30712	1.62337	NA
WBGene00022008		Y59H11AM.4	Y59H11AM.4	17.6525	5.53142	3.56182	11.6809	29.7123	1.86437	1	0.698978	0.53824	0.378811	1.62335	NA
WBGene00011522	srap-1	T06D8.1	T06D8.1b	2656.71	1248.99	2120.17	2785.88	2748.39	4247.04	0.0627499	0.698843	0.0107291	6.50965	1.6232	1.20239
WBGene00003457	msp-64	ZK1248.6	ZK1248.6	676.312	214.619	130.006	408.83	1106.29	141.692	0.719896	0.698711	0.492472	0.471122	1.62305	0.14273
WBGene00015298		C01F1.3	C01F1.3a	550.538	474.596	523.587	795.271	864.629	853.883	0.000197834	0.69861	4.08464e-06	21.2247	1.62294	3.7037
WBGene00016416		C34F11.5	C34F11.5	184.248	46.4639	48.0846	112.915	299.104	40.084	0.56827	0.698528	0.312115	1.0217	1.62285	0.245446
WBGene00017654		F21C10.4	F21C10.4	41.9247	46.4639	39.18	64.2447	78.2425	64.3209	1	0.698479	0.06412	3.42748	1.62279	NA
WBGene00001703	grd-14	T01B10.2	T01B10.2	1180.51	590.756	457.694	781.644	2163.06	672.107	0.55053	0.698472	0.294823	1.09746	1.62279	0.259219
WBGene00019348		K02H11.4	K02H11.4	13.2394	4.42514	5.34273	14.6011	20.7986	1.86437	1	0.698094	0.521482	0.410961	1.62236	NA
WBGene00019587		K09F6.4	K09F6.4	99.2955	76.3336	66.7841	121.676	150.543	120.252	0.115114	0.697845	0.0257316	4.97397	1.62208	0.938873
WBGene00013951		ZK262.4	ZK262.4	5.51641	3.31885	0.890455	2.92021	9.90411	2.79656	1	0.697452	0.616572	0.250715	1.62164	NA
WBGene00004232	ptr-18	Y38F1A.3	Y38F1A.3	342.018	115.054	211.928	211.229	587.314	286.181	0.309446	0.697208	0.114488	2.49115	1.62136	0.509415
WBGene00003520	nas-1	F45G2.1	F45G2.1	34.2018	21.0194	19.59	19.4681	63.3863	38.2197	1	0.697187	0.256861	1.2856	1.62134	NA
WBGene00022596		ZC395.4	ZC395.4	24.2722	8.85027	2.67136	14.6011	35.6548	7.4575	1	0.697128	0.481533	0.495388	1.62127	NA
WBGene00009488	oac-20	F36G9.12	F36G9.12	529.576	555.355	375.772	860.489	991.402	514.567	0.0612959	0.696762	0.0103673	6.57066	1.62086	1.21257
WBGene00008263		C53A5.2	C53A5.2	17.6525	16.5943	7.12364	18.4947	24.7603	23.3047	1	0.696479	0.311761	1.0232	1.62054	NA
WBGene00007938		C34F6.1	C34F6.1	321.055	84.0776	239.532	251.138	451.628	342.113	0.284379	0.696198	0.10094	2.69063	1.62023	0.546103
WBGene00015473		C05D9.4	C05D9.4	8.82626	6.63771	7.12364	12.6543	9.90411	13.9828	1	0.696127	0.405381	0.692307	1.62015	NA
WBGene00018850	gpx-8	F55A3.5	F55A3.5	26.4788	30.976	33.8373	40.883	47.5397	59.66	1	0.69601	0.122902	2.37995	1.62002	NA
WBGene00019302		K02D10.2	K02D10.2	9.92955	16.5943	5.34273	14.6011	20.7986	15.8472	1	0.69581	0.374875	0.787441	1.61979	NA
WBGene00000647	col-71	Y49F6B.10	Y49F6B.10	5279.21	1102.97	999.981	1683.02	9058.3	1211.84	0.749326	0.695305	0.535026	0.384838	1.61923	0.125329
WBGene00004402	rom-3	Y116A8C.14	Y116A8C.14	9.92955	6.63771	8.90455	7.78723	13.8658	19.5759	1	0.694834	0.407187	0.686998	1.6187	NA
WBGene00015323	frpr-1	C02B8.5	C02B8.5	8.82626	15.488	28.4945	39.9096	24.7603	21.4403	1	0.694454	0.305883	1.04837	1.61827	NA
WBGene00020891		T28C12.4	T28C12.4b	960.959	856.264	961.691	1610.01	1386.58	1500.82	5.43147e-05	0.6943	8.01645e-07	24.3539	1.6181	4.26508
WBGene00009292		F31D4.5	F31D4.5b	52.9576	30.976	44.5227	60.3511	86.1658	61.5244	1	0.694283	0.0973501	2.74843	1.61808	NA
WBGene00007175		B0395.3	B0395.3.1	3965.2	2545.56	3093.44	5414.07	5049.12	5075.76	0.00221531	0.694194	9.41647e-05	15.2502	1.61798	2.65456
WBGene00007337		C05C12.5	C05C12.5	54.0609	14.3817	13.3568	38.9362	77.2521	15.8472	1	0.694145	0.368477	0.808794	1.61792	NA
WBGene00020962		W02H5.8	W02H5.8	547.228	439.195	504.888	868.277	744.789	799.817	0.00103687	0.694033	3.39519e-05	17.1827	1.6178	2.98428
WBGene00019586		K09F6.3	K09F6.3	144.53	51.9954	47.1941	80.7926	268.401	44.745	0.541523	0.693921	0.28607	1.13803	1.61767	0.266383
WBGene00022415		Y102A11A.5	Y102A11A.5	225.07	122.798	108.635	131.41	473.417	133.303	0.400905	0.693916	0.170228	1.88093	1.61767	0.396958
WBGene00006787	unc-52	ZC101.2	ZC101.2o	14176.1	5400.88	9181.48	13634.5	16607.2	16274.1	0.0748801	0.693744	0.0136788	6.07913	1.61748	1.12563
WBGene00021095	mlt-8	W08F4.6	W08F4.6	1159.55	393.837	647.361	695.011	2059.07	805.41	0.545675	0.693693	0.290237	1.11852	1.61742	0.263066
WBGene00010573		K04H4.2	K04H4.2a.2	1447.51	265.508	939.43	819.606	2090.76	1379.64	0.604035	0.693628	0.349457	0.875429	1.61735	0.218938
WBGene00019906		R05G9R.1	R05G9R.1	46.3379	19.9131	32.0564	15.5745	109.936	33.5587	1	0.693596	0.339159	0.913609	1.61731	NA
WBGene00019154	glf-1	H04M03.4	H04M03.4	362.98	132.754	188.776	209.282	629.902	267.538	0.330316	0.693446	0.126569	2.33409	1.61714	0.481071
WBGene00011436		T04F3.1	T04F3.1a	2800.13	1585.31	2278.67	2981.54	3489.22	4302.98	0.020843	0.693028	0.0022324	9.34791	1.61667	1.68104
WBGene00022467		Y119C1B.1	Y119C1B.1	31.9952	5.53142	8.01409	14.6011	49.5206	9.32187	1	0.692991	0.462193	0.540578	1.61663	NA
WBGene00013956		ZK265.3	ZK265.3	180.938	54.2079	51.6464	114.862	297.123	51.2703	0.534408	0.692988	0.279682	1.16864	1.61663	0.272127
WBGene00009489		F36G9.13	F36G9.13	31.9952	11.0628	4.45227	16.5479	52.4918	7.4575	1	0.692763	0.470374	0.521097	1.61638	NA
WBGene00022858		ZK1193.2	ZK1193.2	1951.71	1489.06	1734.61	2758.63	2563.18	3038.93	0.000318133	0.691995	7.51778e-06	20.0567	1.61552	3.49739
WBGene00014007		ZK596.2	ZK596.2	46.3379	11.0628	8.01409	24.3351	60.4151	20.5081	1	0.691563	0.394297	0.72565	1.61503	NA
WBGene00044900	cnc-11	R09B5.13	R09B5.13	2.20657	6.63771	0.890455	6.81383	5.94247	2.79656	1	0.691448	0.614663	0.253441	1.6149	NA
WBGene00010574		K04H4.5	K04H4.5	199.694	58.6331	29.385	113.888	294.152	55.9312	0.57462	0.691174	0.317889	0.997614	1.6146	0.240619
WBGene00015348		C02F5.5	C02F5.5	61.7838	26.5508	18.6995	46.7234	109.936	15.8472	1	0.691073	0.346296	0.886985	1.61448	NA
WBGene00017902		F28E10.4	F28E10.4	18.7558	12.1691	6.23318	17.5213	36.6452	5.59312	1	0.690668	0.439648	0.597201	1.61403	NA
WBGene00015496		C05E11.7	C05E11.7	29.7886	7.74399	23.1518	16.5479	55.463	26.1012	1	0.690349	0.346775	0.885225	1.61367	NA
WBGene00003429	msp-31	R05F9.13	R05F9.13	959.856	257.764	211.928	623.952	1457.89	224.657	0.705156	0.690283	0.471469	0.518531	1.6136	0.151715
WBGene00009458		F36A2.11	F36A2.11	20.9624	6.63771	7.12364	14.6011	36.6452	4.66094	1	0.690202	0.473106	0.514712	1.61351	NA
WBGene00000082	adt-1	C02B4.1	C02B4.1	109.225	30.976	77.4696	71.0585	169.36	110.93	0.406392	0.689967	0.174246	1.84603	1.61325	0.391055
WBGene00020795		T25D1.3	T25D1.3	7.72298	3.31885	6.23318	10.7074	6.93288	10.2541	1	0.689768	0.47926	0.500548	1.61302	NA
WBGene00015300		C01F1.5	C01F1.5	79.4364	26.5508	53.4273	42.8298	174.312	40.084	0.544027	0.689432	0.28839	1.12712	1.61265	0.264379
WBGene00013657		Y105C5B.18	Y105C5B.18	50.751	27.6571	8.90455	37.9628	93.0987	9.32187	1	0.688825	0.416523	0.660103	1.61197	NA
WBGene00014127		ZK892.3	ZK892.3	26.4788	8.85027	6.23318	7.78723	52.4918	6.52531	1	0.688538	0.49697	0.4614	1.61165	NA
WBGene00017657		F21C10.7	F21C10.7	2318	1300.99	1855.71	2595.1	3075.23	3152.66	0.0146118	0.688463	0.00132342	10.3096	1.61157	1.8353
WBGene00021740		Y50D4B.1	Y50D4B.1	15.446	9.95656	7.12364	17.5213	17.8274	16.7794	1	0.688455	0.348583	0.878607	1.61156	NA
WBGene00010014		F54B3.2	F54B3.2	7.72298	3.31885	7.12364	4.86702	20.7986	3.72875	1	0.688379	0.535577	0.383799	1.61147	NA
WBGene00009539		F38C2.7	F38C2.7	14.3427	27.6571	11.5759	30.1755	27.7315	27.9656	1	0.687984	0.264771	1.24364	1.61103	NA
WBGene00009382		F34H10.5	F34H10.5	6.6197	15.488	9.795	21.4149	17.8274	12.1184	1	0.68798	0.368933	0.807257	1.61103	NA
WBGene00011681		T10B10.4	T10B10.4b	109.225	21.0194	23.1518	114.862	35.6548	96.0153	0.576624	0.68794	0.320006	0.988923	1.61098	0.239107
WBGene00015937		C17H12.12	C17H12.12	215.14	60.8456	48.975	125.569	338.721	58.7278	0.549753	0.687867	0.29392	1.10158	1.6109	0.259832
WBGene00044015		K06A4.8	Pseudogene:K06A4.8	13.2394	17.7005	11.5759	18.4947	40.6069	9.32187	1	0.687657	0.371398	0.798983	1.61067	NA
WBGene00016517	nhr-260	C38C3.9	C38C3.9	11.0328	6.63771	8.90455	15.5745	19.8082	7.4575	1	0.686839	0.411299	0.675043	1.60975	NA
WBGene00022282		Y74C10AR.2	Y74C10AR.2	2.20657	3.31885	9.795	9.73404	5.94247	9.32187	1	0.686808	0.530463	0.393505	1.60972	NA
WBGene00015629		C09B9.4	C09B9.4	67.3003	24.3383	14.2473	41.8564	102.012	26.1012	1	0.686609	0.336131	0.92513	1.6095	NA
WBGene00020245		T05B11.1	T05B11.1	264.788	230.107	222.614	354.319	481.34	318.808	0.0283783	0.686527	0.00341694	8.57028	1.6094	1.54701
WBGene00013263		Y57A10A.23	Y57A10A.23	1476.19	1038.8	1055.19	1373.47	2989.06	1382.43	0.104331	0.686368	0.0221313	5.23543	1.60923	0.981588
WBGene00022849	acs-6	ZK1127.2	ZK1127.2	95.9856	30.976	58.77	82.7394	140.638	75.5072	0.380435	0.686299	0.157188	2.00108	1.60915	0.419719
WBGene00007481		C09F9.4	Pseudogene:C09F9.4	153.356	16.5943	82.8123	89.5532	226.804	90.4222	0.547502	0.68619	0.29191	1.11079	1.60903	0.261615
WBGene00044135		F08G12.11	F08G12.11	2.20657	3.31885	8.90455	7.78723	13.8658	1.86437	1	0.685983	0.576426	0.312048	1.6088	NA
WBGene00007306		C04G2.5	C04G2.5	39.7182	11.0628	11.5759	21.4149	69.3288	9.32187	1	0.684973	0.429773	0.623437	1.60767	NA
WBGene00010071	sre-45	F54F11.3	F54F11.3	1.10328	3.31885	4.45227	3.89362	3.96165	6.52531	1	0.684936	0.606877	0.264748	1.60763	NA
WBGene00001328	epi-1	K08C7.3	K08C7.3b.2	4371.21	2719.25	3939.37	5355.67	5626.53	6739.71	0.00747978	0.684068	0.000510355	12.0774	1.60666	2.12611
WBGene00012731		Y39G8C.2	Y39G8C.2	30.8919	14.3817	5.34273	17.5213	47.5397	15.8472	1	0.683946	0.408316	0.683699	1.60653	NA
WBGene00077761	zip-9	F17C11.17	F17C11.17	2396.33	1470.25	2436.28	3481.87	3292.13	3353.08	0.00960077	0.683866	0.000726753	11.4196	1.60644	2.01769
WBGene00019510		K07H8.10	K07H8.10	35299.5	24184.5	27738.6	47904.1	43577.1	48614.5	0.0009028	0.68365	2.81784e-05	17.5369	1.6062	3.04441
WBGene00017429		F13D11.4	F13D11.4.1	197.488	138.286	206.585	216.096	390.222	265.673	0.106045	0.683558	0.0227845	5.18486	1.6061	0.974508
WBGene00010468		K01D12.9	K01D12.9	234.999	119.479	65.8936	100.261	443.704	130.506	0.485278	0.683408	0.235339	1.4083	1.60593	0.31401
WBGene00017056		D2062.4	D2062.4b	25.3755	6.63771	3.56182	11.6809	39.6165	5.59312	1	0.683407	0.511306	0.431393	1.60593	NA
WBGene00011910	alg-3	T22B3.2	T22B3.2b	264.788	49.7828	54.3177	141.144	377.347	73.6428	0.717572	0.683251	0.489211	0.478261	1.60575	0.144135
WBGene00007949		C35A5.5	C35A5.5	18.7558	11.0628	14.2473	10.7074	38.626	21.4403	1	0.683221	0.351206	0.869094	1.60572	NA
WBGene00044463		W09G12.10	W09G12.10	41.9247	34.2948	16.9186	15.5745	101.022	32.6266	1	0.683159	0.346828	0.885027	1.60565	NA
WBGene00008801	acp-3	F14E5.3	F14E5.3	28.6854	7.74399	8.90455	10.7074	54.4726	7.4575	1	0.682721	0.475458	0.509264	1.60516	NA
WBGene00022754	nspd-1	ZK484.8	ZK484.8	422.557	134.967	84.5932	248.218	693.288	88.5578	0.726877	0.682124	0.503345	0.447877	1.6045	0.138539
WBGene00019939	lips-17	R07G3.2	R07G3.2	107.018	131.648	94.3882	141.144	241.66	151.014	0.138784	0.681989	0.0345152	4.469	1.60435	0.857662
WBGene00019655		K11G9.5	K11G9.5	154.46	134.967	124.664	198.574	252.555	212.539	0.038276	0.68194	0.00528499	7.77925	1.6043	1.41707
WBGene00011795		T16A9.5	T16A9.5.2	353.051	98.4593	80.1409	192.734	570.477	89.49	0.712009	0.681918	0.480013	0.498833	1.60427	0.147514
WBGene00018640		F49E10.2	F49E10.2a	264.788	54.2079	166.515	152.824	392.203	233.979	0.413894	0.681873	0.17925	1.80384	1.60422	0.383111
WBGene00017998		F33D4.6	F33D4.6b	1433.16	344.054	584.138	532.452	2573.09	680.497	0.684993	0.681108	0.445519	0.582026	1.60337	0.164314
WBGene00022191		Y71H2B.1	Y71H2B.1	204.107	193.6	163.844	347.505	267.411	284.317	0.0242858	0.68108	0.00274412	8.97024	1.60334	1.61465
WBGene00016788		C49G7.10	C49G7.10	308.919	514.422	252.889	708.638	557.602	457.704	0.100655	0.680993	0.0210256	5.32467	1.60324	0.997165
WBGene00000655	col-79	C09G5.3	C09G5.3	177.629	40.9325	32.0564	71.0585	291.181	39.1519	0.623067	0.680906	0.368874	0.807453	1.60315	0.205465
WBGene00009714		F44G4.5	F44G4.5	23.1689	16.5943	9.795	17.5213	50.511	11.1862	1	0.680705	0.384714	0.755583	1.60292	NA
WBGene00019652		K11G9.1	K11G9.1	15.446	21.0194	27.6041	38.9362	29.7123	34.4909	1	0.680626	0.207757	1.58699	1.60284	NA
WBGene00009494	hrg-5	F36H1.9	F36H1.9	4.41313	4.42514	4.45227	6.81383	8.9137	5.59312	1	0.68056	0.523226	0.407529	1.60276	NA
WBGene00006056	sss-1	F32B6.5	F32B6.5	500.89	172.58	105.074	340.691	788.367	118.388	0.703305	0.680417	0.468927	0.524503	1.6026	0.152856
WBGene00017108	cyp-43A1	E03E2.1	E03E2.1.2	736.993	804.269	854.836	1371.53	1217.22	1252.86	0.000107667	0.680412	1.93642e-06	22.6571	1.6026	3.96792
WBGene00009430		F35E12.6	F35E12.6.2	3302.13	3881.95	3946.5	6052.63	6109.85	5677.02	8.50846e-06	0.680381	8.9895e-08	28.5802	1.60256	5.07015
WBGene00007838	fbxa-168	C31C9.4	C31C9.4	15.446	5.53142	13.3568	22.3883	18.8178	13.9828	1	0.680355	0.366764	0.814599	1.60253	NA
WBGene00008448		E01G4.6	E01G4.6	3527.2	720.191	480.846	902.346	5944.45	727.106	0.772638	0.679776	0.573494	0.316871	1.60189	0.112024
WBGene00022709		ZK354.8	ZK354.8	139.014	38.7199	43.6323	81.766	226.804	45.6772	0.550161	0.679613	0.294479	1.09903	1.60171	0.25951
WBGene00023245		C33E10.3	Pseudogene:C33E10.3	23.1689	25.4445	27.6041	59.3777	37.6356	25.1691	1	0.678391	0.211245	1.56287	1.60035	NA
WBGene00003768	nlp-30	B0213.5	B0213.5	38.6149	21.0194	16.0282	16.5479	76.2617	27.9656	1	0.677775	0.338824	0.914877	1.59967	NA
WBGene00020991		W03D8.10	Pseudogene:W03D8.10	50.751	7.74399	6.23318	19.4681	77.2521	6.52531	1	0.67701	0.508628	0.436889	1.59882	NA
WBGene00022724		ZK380.4	ZK380.4	2.20657	4.42514	7.12364	3.89362	9.90411	8.38968	1	0.676798	0.547393	0.362008	1.59859	NA
WBGene00022178		Y71H2AM.13	Y71H2AM.13	3509.54	3404.04	2950.08	5429.65	5122.41	5211.86	5.8375e-06	0.676721	5.74381e-08	29.448	1.5985	5.23377
WBGene00015917		C17G10.3	C17G10.3	60.6806	18.8068	12.4664	29.2021	112.907	4.66094	1	0.676671	0.47854	0.502188	1.59845	NA
WBGene00009840	fbxa-189	F47H4.9	F47H4.9	49.6477	76.3336	66.7841	80.7926	127.763	99.744	0.206202	0.676603	0.0616493	3.49245	1.59837	0.685708
WBGene00009589		F40F11.4	F40F11.4	3.30985	4.42514	6.23318	3.89362	14.8562	3.72875	1	0.676441	0.561113	0.337781	1.59819	NA
WBGene00012163		VZK822L.2	VZK822L.2	22.0657	25.4445	33.8373	38.9362	51.5014	40.084	1	0.676252	0.160355	1.97087	1.59798	NA
WBGene00012905		Y46G5A.14	Y46G5A.14	26.4788	15.488	11.5759	23.3617	56.4534	5.59312	1	0.675827	0.429459	0.624285	1.59751	NA
WBGene00011267	fbxb-85	R17.1	R17.1	15.446	43.1451	27.6041	52.5638	52.4918	32.6266	1	0.675685	0.221958	1.49167	1.59735	NA
WBGene00000716	col-143	T15B7.3	T15B7.3	74672.4	52544.1	51209.2	101958	78362.3	104673	0.00609452	0.67562	0.000383396	12.6114	1.59728	2.21506
WBGene00021557		Y45G5AM.5	Y45G5AM.5	14.3427	35.4011	24.0423	47.6968	52.4918	17.7116	1	0.67531	0.288184	1.12809	1.59694	NA
WBGene00007410		C07B5.6	C07B5.6	12.1361	14.3817	8.90455	15.5745	28.7219	12.1184	1	0.675123	0.364069	0.823807	1.59673	NA
WBGene00008350		CE7X_3.2	Pseudogene:CE7X_3.2	9.92955	6.63771	12.4664	24.3351	13.8658	8.38968	1	0.6751	0.414032	0.667192	1.59671	NA
WBGene00010763		K10H10.7	K10H10.7	28.6854	6.63771	5.34273	14.6011	43.5781	6.52531	1	0.675023	0.492175	0.471768	1.59662	NA
WBGene00011938	alh-13	T22H6.2	T22H6.2a	1446.4	765.549	1060.53	1507.8	2315.58	1401.08	0.0658869	0.674866	0.0115099	6.38485	1.59645	1.1812
WBGene00009884		F49C12.15	F49C12.15	531.782	149.348	150.487	351.399	771.53	204.149	0.648293	0.674542	0.401128	0.704941	1.59609	0.188229
WBGene00007811		C29F7.2	C29F7.2	520.75	556.461	582.357	794.298	934.948	919.137	0.000532853	0.673773	1.47406e-05	18.7708	1.59524	3.27339
WBGene00012869		Y45F10A.7	Y45F10A.7a	349.741	304.228	336.592	546.08	483.321	550.923	0.00237464	0.673758	0.000104952	15.0455	1.59522	2.6244
WBGene00000830	ctl-1	Y54G11A.6	Y54G11A.6	1338.28	867.327	1332.12	1981.85	1714.4	1948.27	0.00885034	0.673642	0.000643129	11.6468	1.5951	2.05304
WBGene00015280		C01B10.6	C01B10.6d.3	1019.43	769.974	465.708	1204.1	1132.04	1256.59	0.0584373	0.672974	0.00969006	6.691	1.59436	1.23331
WBGene00014183		ZK1025.3	ZK1025.3.1	434.693	121.691	304.535	246.271	735.876	390.586	0.355709	0.672822	0.142441	2.15139	1.59419	0.448905
WBGene00004120	pqn-32	F29C12.1	F29C12.1a	1829.24	359.542	793.395	757.309	2892.99	1103.71	0.67223	0.672803	0.428744	0.626225	1.59417	0.172482
WBGene00003839	ocr-2	T09A12.3	T09A12.3	20.9624	21.0194	41.8514	43.8032	52.4918	38.2197	1	0.672515	0.195223	1.67776	1.59385	NA
WBGene00009520	clec-168	F38A1.7	F38A1.7a	12.1361	9.95656	16.9186	17.5213	18.8178	26.1012	1	0.672446	0.318102	0.996736	1.59377	NA
WBGene00015190		B0432.9	B0432.9	78.3331	73.0148	69.4555	129.463	99.0411	123.049	0.118135	0.672432	0.0268492	4.90048	1.59376	0.927623
WBGene00007966	maph-1.3	C36A4.5	C36A4.5	8151.05	5302.42	6242.09	10483.6	8502.68	12394.4	0.0107451	0.672045	0.000856208	11.1152	1.59333	1.96879
WBGene00007770	nhr-259	C27C7.8	C27C7.8	9.92955	9.95656	15.1377	9.73404	26.7411	19.5759	1	0.671895	0.37366	0.791457	1.59316	NA
WBGene00010723	cpg-7	K09E4.6	K09E4.6	656.453	282.102	307.207	370.867	1253.86	359.824	0.597579	0.671893	0.342672	0.900411	1.59316	0.223605
WBGene00010118		F55F3.4	F55F3.4	29.7886	8.85027	9.795	18.4947	42.5877	15.8472	1	0.671871	0.389551	0.740342	1.59314	NA
WBGene00013721		Y106G6H.9	Y106G6H.9	18.7558	28.7634	12.4664	36.9894	37.6356	20.5081	1	0.671385	0.275383	1.18974	1.5926	NA
WBGene00013722		Y106G6H.10	Pseudogene:Y106G6H.10	18.7558	28.7634	12.4664	36.9894	37.6356	20.5081	1	0.671385	0.275383	1.18974	1.5926	NA
WBGene00000732	col-159	F57B1.3	F57B1.3	19075.8	5393.14	3902.86	12006	26076.5	7099.54	0.670036	0.671308	0.425619	0.634749	1.59252	0.173902
WBGene00001752	gst-4	K08F4.7	K08F4.7	434.693	712.447	431.871	784.564	1008.24	720.581	0.046036	0.671298	0.00684288	7.31375	1.59251	1.3369
WBGene00006209	str-164	Y9C9A.2	Y9C9A.2	2.20657	1.10628	0.890455	0.973404	0.990411	4.66094	1	0.671226	0.723251	0.125399	1.59243	NA
WBGene00219831		C25F6.30	C25F6.30	23.1689	11.0628	17.8091	21.4149	30.7028	30.7622	1	0.670895	0.272551	1.20386	1.59206	NA
WBGene00010755	vglu-2	K10G9.1	K10G9.1	838.495	595.181	741.749	1094.11	1261.78	1107.44	0.003344	0.670646	0.000169641	14.1406	1.59179	2.47573
WBGene00017255		F08D12.12	F08D12.12	19.8591	9.95656	16.0282	17.5213	23.7699	31.6944	1	0.670619	0.304762	1.05324	1.59176	NA
WBGene00022816	fbn-1	ZK783.1	ZK783.1k	369.6	88.5027	323.235	277.42	478.369	488.466	0.333668	0.670601	0.128634	2.30891	1.59174	0.476685
WBGene00012635		Y38H8A.1	Y38H8A.1	66.197	18.8068	27.6041	36.9894	101.022	41.0162	1	0.670597	0.288802	1.1252	1.59173	NA
WBGene00012177	decr-1.2	W01C9.4	W01C9.4	37.5116	6.63771	7.12364	16.5479	56.4534	8.38968	1	0.670562	0.485667	0.486112	1.59169	NA
WBGene00044299		C42D8.9	C42D8.9	4.41313	1.10628	5.34273	2.92021	8.9137	5.59312	1	0.670053	0.59953	0.275706	1.59113	NA
WBGene00008027	scl-5	C39E9.2	C39E9.2	250.445	227.895	284.055	464.314	338.721	411.095	0.0184213	0.670019	0.00186159	9.68124	1.59109	1.73468
WBGene00044469	clec-173	T26C12.6	T26C12.6	878.213	959.148	831.685	1472.76	1454.91	1317.18	9.63771e-05	0.669848	1.66342e-06	22.9492	1.59091	4.01603
WBGene00219316		F21A3.11	F21A3.11	351.947	534.335	436.323	630.766	737.856	734.564	0.0126374	0.669321	0.00107733	10.6897	1.59032	1.89834
WBGene00010634		K07F5.6	K07F5.6	36.4083	11.0628	10.6855	18.4947	66.3576	7.4575	1	0.669142	0.457266	0.552578	1.59013	NA
WBGene00000755	col-182	R09A8.4	R09A8.4	150.046	40.9325	30.2755	45.75	251.564	54.0669	0.614767	0.668996	0.359965	0.838015	1.58997	0.211289
WBGene00008913		F17C11.1	F17C11.1	3733.51	2255.71	3287.56	5037.37	1912-11-25 08:48:58	4999.32	0.0071718	0.668945	0.000483855	12.1769	1.58991	1900-01-02 03:27:53
WBGene00020139		T01B11.2	T01B11.2a.2	1782.91	1514.5	1802.28	2740.13	2918.74	2450.72	0.000152736	0.668905	2.99338e-06	21.8208	1.58987	3.81606
WBGene00017834		F26F12.3	F26F12.3b	5279.21	4653.03	5622.33	7810.6	6998.25	9909.15	0.00157336	0.66817	6.12746e-05	16.0628	1.58906	2.80317
WBGene00016556	math-21	C40D2.3	C40D2.3	11.0328	12.1691	11.5759	12.6543	27.7315	14.915	1	0.667998	0.359857	0.838392	1.58887	NA
WBGene00002393	lpr-1	Y65B4BR.2	Y65B4BR.2a	102.605	71.9085	81.9218	96.367	202.044	109.066	0.246888	0.667998	0.0814	3.03672	1.58887	0.6075
WBGene00019512		K08A2.2	K08A2.2	51.8543	18.8068	22.2614	37.9628	86.1658	23.3047	1	0.667742	0.312375	1.02061	1.58858	NA
WBGene00009416		F35E2.9	F35E2.9	114.741	44.2514	48.0846	71.0585	210.958	46.6094	0.524434	0.667287	0.269904	1.21724	1.58808	0.280309
WBGene00020284	mel-46	T06A10.1	T06A10.1c	2872.95	2236.91	2524.44	4062.99	3427.81	4632.04	0.00157674	0.667226	6.21846e-05	16.0349	1.58802	2.80224
WBGene00012791		Y43D4A.5	Y43D4A.5a	157.769	59.7393	42.7418	73.0053	295.143	44.745	0.582498	0.66715	0.327216	0.959883	1.58793	0.234706
WBGene00022680		ZK180.6	ZK180.6b	2856.4	537.654	857.508	1005.53	4536.08	1209.05	0.713313	0.66707	0.483481	0.491001	1.58785	0.14672
WBGene00008615		F09C6.1	F09C6.1	4.41313	13.2754	5.34273	12.6543	6.93288	16.7794	1	0.667069	0.475842	0.508378	1.58784	NA
WBGene00018738	swip-10	F53B1.6	F53B1.6	75.0232	49.7828	49.8655	59.3777	135.686	82.0325	0.328555	0.667055	0.125375	2.34886	1.58783	0.483391
WBGene00019310		K02E7.5	Pseudogene:K02E7.5	3.30985	2.21257	1.78091	6.81383	0.990411	3.72875	1	0.666784	0.657652	0.196388	1.58753	NA
WBGene00022033		Y65B4BL.1	Y65B4BL.1c	657.557	98.4593	313.44	343.612	909.198	444.653	0.661524	0.666537	0.414766	0.665097	1.58726	0.179454
WBGene00019261		H34I24.2	H34I24.2	5500.97	4169.59	5217.17	7455.3	7270.61	8905.18	0.00081974	0.666524	2.49909e-05	17.7652	1.58724	3.08632
WBGene00010246		F58D5.7	F58D5.7	82.7462	43.1451	25.8232	57.4309	164.408	18.6437	0.610366	0.666408	0.355616	0.853316	1.58712	0.21441
WBGene00001581	gfi-1	F57F4.3	F57F4.3	29477.5	13117.2	21188.4	30014.9	33470.9	37737.7	0.0520821	0.666302	0.00819098	6.99123	1.587	1.28331
WBGene00022258		Y73C8B.1	Y73C8B.1	86.0561	79.6525	68.565	125.569	116.869	128.642	0.1034	0.666285	0.0218327	5.25907	1.58698	0.985478
WBGene00007863		C32C4.3	C32C4.3c	16.5492	11.0628	14.2473	13.6277	43.5781	9.32187	1	0.666091	0.40861	0.682842	1.58677	NA
WBGene00022813		ZK742.3	ZK742.3	389.459	392.731	316.111	547.053	705.173	489.398	0.017472	0.666074	0.00171352	9.83361	1.58675	1.75766
WBGene00006493	tag-147	R09A8.3	R09A8.3.1	5260.45	3551.17	4300.01	7018.24	6173.23	7609.44	0.00297458	0.665834	0.000144423	14.4436	1.58648	2.52657
WBGene00044646		B0205.14	B0205.14	3.30985	4.42514	4.45227	7.78723	6.93288	4.66094	1	0.665591	0.551134	0.35529	1.58622	NA
[truncated: 15,756 more rows]

## Sheet: B. S4.15.out
wormbase_id	gene_name	sequence	Gene ID	EV1	EV2	EV3	sams4_1	sams4_2	sams4_3	padj	log2FoldChange	foldChange
WBGene00015538	sams-3	C06E7.1	C06E7.1a	9858.18	8031.34	10916.4	1840.81	1304.89	1872.9	1.32e-42	-2.5525	0.17046
WBGene00015538	sams-3	C06E7.1	C06E7.1b	96.42	45.92	105.5	13.55	5.86	3.95	2.72e-08	-2.2744	0.206698
WBGene00017105		E02H9.7	E02H9.7.1	354	589	506	112	110	131	8.18e-16	-2.01103	0.248096
WBGene00022096		Y69A2AR.25	Y69A2AR.25	164.33	180.72	116.59	33.74	40.61	24.47	1.83e-09	-1.99727	0.250474
WBGene00000708	col-135	M199.5	M199.5a	2487	1247	1222	475	339	547	3.71e-07	-1.69916	0.307965
WBGene00013807		Y116A8C.30	Y116A8C.30b	81.24	70.83	132.73	26.64	30.22	10.3	6.8e-06	-1.69116	0.309679
WBGene00007283	clec-222	C03E10.6	C03E10.6	1161	2121	1896	412	528	724	2.67e-08	-1.59549	0.33091
WBGene00077757		E02H4.7	E02H4.7	359	746	617	178	175	229	3.19e-07	-1.51831	0.349094
WBGene00009182		F26H11.4	F26H11.4	441	418	609	213	178	178	8.78e-19	-1.48095	0.358253
WBGene00010256	hrg-3	F58E6.7	F58E6.7	146.23	410.81	124.41	26.43	34.53	82.35	0.000705825	-1.47431	0.359906
WBGene00019978	hacd-1	R09B5.6	R09B5.6	5292	6366	6162	2534	2490	2353	1.7e-24	-1.43013	0.371099
WBGene00015538	sams-3	C06E7.1	C06E7.1c	193.38	211.93	280.63	29.86	20.91	109.95	0.00093653	-1.42224	0.373133
WBGene00009451	cids-2	F36A2.1	F36A2.1e	1803.47	805.99	485.65	332.1	372.03	221.43	0.000432728	-1.41408	0.375249
WBGene00020433		T11F8.1	T11F8.1	813	1732	1484	445	502	567	7.51e-07	-1.4085	0.376703
WBGene00004954	spd-3	H34C03.1	H34C03.1	480	892	814	297	295	269	5.48e-08	-1.38768	0.382178
WBGene00010058		F54E4.2	F54E4.2	141	244	279	81	75	97	2.12e-06	-1.36989	0.38692
WBGene00007515		C10C6.7	C10C6.7c	90	143	126	34	56	44	1.49e-05	-1.36976	0.386957
WBGene00019977	fpn-1.2	R09B5.4	R09B5.4	162	149	164	67	54	72	1.75e-08	-1.36388	0.388536
WBGene00021898		Y54G2A.36	Y54G2A.36	457.64	537.38	499.85	183.21	220.43	231.82	3.83e-12	-1.3576	0.390232
WBGene00017407		F12E12.6	F12E12.6	84	144	107	44	41	46	5.27e-05	-1.30693	0.40418
WBGene00006555	tbx-36	ZK829.5	ZK829.5	1279	1584	1528	608	688	677	1.08e-16	-1.30517	0.404674
WBGene00007282	clec-223	C03E10.5	C03E10.5	5457	3970	6165	2145	1937	2703	6.44e-11	-1.3007	0.405929
WBGene00014044		ZK666.4	ZK666.4	22.37	25.72	18.18	4.55	7.67	6.76	0.00295684	-1.2993	0.406322
WBGene00219738	anr-1	T26A5.11	T26A5.11	274.58	254.64	258.21	155.3	39.95	39.3	0.00245605	-1.28576	0.410155
WBGene00021654		Y47G7B.2	Y47G7B.2	143	203	212	71	102	66	3.16e-06	-1.26271	0.416761
WBGene00013610	fbxa-206	Y102A5C.1	Y102A5C.1	1235	2448	2112	823	935	764	2.18e-06	-1.254	0.419283
WBGene00022083		Y69A2AR.12	Y69A2AR.12	282.99	205.69	232.79	102.13	124.06	99.95	5.39e-07	-1.23193	0.425746
WBGene00044535		K11D12.13	K11D12.13	1991	2784	2767	1055	1188	1308	4.64e-11	-1.21775	0.429954
WBGene00020163		T02G5.3	T02G5.3	223	363	361	110	141	171	1.56e-05	-1.20167	0.434772
WBGene00012673	dyf-17	Y39B6A.11	Y39B6A.11	520	467	571	249	229	274	2.7e-14	-1.19769	0.435972
WBGene00020480	ssup-72	T13C2.4	T13C2.4	2340	3419	2669	1267	1487	1338	6.97e-08	-1.16916	0.44468
WBGene00016204	gsto-1	C29E4.7	C29E4.7	890.01	1247.84	933.1	338.2	355.4	666.13	0.000276391	-1.16889	0.444764
WBGene00020218		T04G9.7	T04G9.7	4167	7408	5291	2223	3011	2722	1.2e-05	-1.16438	0.446157
WBGene00001963	btb-1	F40G9.4	F40G9.4	49	45	79	27	16	27	0.00132635	-1.16342	0.446454
WBGene00077784		F35C8.9	F35C8.9	24	33	30	11	11	11	0.00412441	-1.1537	0.449471
WBGene00007605	asp-10	C15C8.3	C15C8.3a	16300	16151	11586	5219	5456	9548	0.000194825	-1.1522	0.449937
WBGene00021713		Y49F6A.5	Y49F6A.5	99	89	106	45	45	49	6.99e-06	-1.15182	0.450058
WBGene00001842	her-1	ZK287.8	ZK287.8a	38	60	42	24	18	11	0.00471634	-1.1514	0.450188
WBGene00138720		F58H1.8	F58H1.8	772	1328	1200	495	545	555	1.22e-06	-1.14578	0.451946
WBGene00045268	ttr-42	H01M10.3	H01M10.3	967	2283	1499	531	800	802	0.000587663	-1.14012	0.453721
WBGene00003099	lys-10	F17E9.11	F17E9.11	60.98	232.98	223.98	52	73.97	67.96	0.00614063	-1.13143	0.456464
WBGene00007162	fbxa-153	B0391.5	B0391.5	288	471	437	164	203	211	7.58e-06	-1.13042	0.456784
WBGene00016695		C45H4.14	C45H4.14a	218.3	330.24	240.69	134.34	134.34	111.95	4.68e-05	-1.12738	0.457747
WBGene00010195	pot-2	F57C2.3	F57C2.3	1369	2576	1933	884	1014	951	1.96e-05	-1.12702	0.457861
WBGene00010077		F55A11.4	F55A11.4a	1624.11	1534.21	1847.21	931.24	858.3	789.27	2.03e-21	-1.12649	0.45803
WBGene00018903		F55G1.7	F55G1.7c	215	300	328	138	126	151	4.49e-07	-1.12323	0.459065
WBGene00044431		W03G9.8	W03G9.8	2091	3443	2724	1249	1434	1456	2.53e-06	-1.10834	0.463828
WBGene00008420		D2030.11	D2030.11	575.57	1080.98	812.44	380.1	429.7	399.09	4.69e-05	-1.10593	0.464603
WBGene00007315		C04H5.7	C04H5.7a	802.28	2317.22	1276.22	515	782.31	661	0.00254859	-1.10142	0.466057
WBGene00002102	ins-19	T10D4.13	T10D4.13	6	20	30	2	4	5	0.0169657	-1.09895	0.466856
WBGene00015462		C05C8.5	C05C8.5	2686.77	4252.6	3673.8	1757.18	1803.22	1849.33	2.04e-07	-1.09894	0.466861
WBGene00007429		C08B6.8	C08B6.8b.1	378.85	636.73	379.6	94.79	221.53	279.98	0.00483598	-1.09742	0.467352
WBGene00017767		F25B4.4	F25B4.4	1420.73	2117.47	1935	840.96	1044.9	920.42	8.15e-08	-1.09628	0.467721
WBGene00019605	ctsa-1	K10B2.2	K10B2.2a	993	1830	1288	497	648	831	0.000345603	-1.09384	0.468512
WBGene00014061		ZK673.5	ZK673.5	53	80	77	33	30	35	0.000717838	-1.09055	0.469581
WBGene00008318		C54G4.9	C54G4.9	1586	3060	2423	1125	1175	1218	3.35e-05	-1.08994	0.469781
WBGene00017239		F08B6.1	F08B6.1	483.21	980.22	783.43	307.31	406.31	381.66	0.000186312	-1.08774	0.470499
WBGene00014801		K08E5.1	K08E5.1b	211.49	175.8	166.66	96.68	73.79	103.42	0.00012313	-1.08578	0.471138
WBGene00194706		C53A5.16	C53A5.16a	839	1468	1313	543	658	634	9.83e-06	-1.07818	0.473626
WBGene00008536		F02H6.3	F02H6.3a.2	1257	2134	2010	788	984	974	4.85e-06	-1.07811	0.473648
WBGene00008824		F14H3.5	F14H3.5	938	1292	1319	549	656	650	3.46e-09	-1.07677	0.474088
WBGene00015191		B0432.10	B0432.10.1	944	1584	1364	605	707	701	6.63e-06	-1.06148	0.479141
WBGene00016056		C24D10.5	C24D10.5	143	299	237	71	118	129	0.00282672	-1.05223	0.482222
WBGene00001872	him-14	ZK1127.11	ZK1127.11	1580.64	2152.21	2255.59	1008.29	1142.3	1057.81	1.3e-10	-1.05198	0.482307
WBGene00006394	taf-11.2	K10D3.3	K10D3.3	2509	2891	2644	1487	1482	1392	2.92e-11	-1.05071	0.482732
WBGene00045292	fbxa-179	T14C1.3	T14C1.3	49	96	62	32	30	32	0.00534952	-1.04977	0.483046
WBGene00006391	taf-9	T12D8.7	T12D8.7	3572	4265	4270	2222	2185	2182	3.94e-15	-1.04894	0.483324
WBGene00235133		T26H5.14	T26H5.14	51	64	36	21	23	23	0.00774833	-1.0486	0.483438
WBGene00011435		T04D3.8	T04D3.8	688	960	689	383	421	427	1.74e-05	-1.04545	0.484492
WBGene00206389		C29F7.10	C29F7.10	420	547	513	255	293	245	7.35e-08	-1.04338	0.48519
WBGene00000988	dhs-25	F09E10.3	F09E10.3	8463	10224	7411	4949	4958	4009	6.25e-06	-1.04297	0.485326
WBGene00013086	arrd-2	Y51B9A.4	Y51B9A.4	122	148	180	51	99	74	0.000454958	-1.04213	0.485608
WBGene00219800		C05D9.12	C05D9.12	252	159	81	52	83	76	0.0126699	-1.04077	0.486069
WBGene00004989	spp-4	T08A9.8	T08A9.8	2365	2482	2064	1296	1259	1189	9.64e-08	-1.03986	0.486375
WBGene00015807		C16A3.2	C16A3.2	1017	1605	1384	634	735	752	3.69e-06	-1.03986	0.486376
WBGene00002042	hus-1	H26D21.1	H26D21.1	1503	2965	2368	1123	1201	1203	9.92e-05	-1.03951	0.486492
WBGene00012527	set-22	Y32F6A.1	Y32F6A.1.2	3075	4459	4156	2010	2109	2188	2.43e-08	-1.03583	0.487734
WBGene00010919		M117.3	M117.3	29	16.8	23	8	10.54	8	0.018446	-1.03362	0.488484
WBGene00086556		F36D1.12	F36D1.12	23	42	78	9	11	27	0.0233286	-1.03274	0.488781
WBGene00013433		Y66D12A.7	Y66D12A.7	536	781	586	305	363	343	2.23e-05	-1.0317	0.489132
WBGene00017134		EEED8.3	EEED8.3	7082	13386	11317	4847	5914	5851	5.87e-05	-1.03044	0.489561
WBGene00012277	ccch-3	W05B10.2	W05B10.2.2	1740.75	2810.39	2343.48	1148.23	1299.04	1240.82	4.31e-06	-1.02894	0.490072
WBGene00077783		D1054.18	D1054.18a.2	128.17	336.13	153.81	83.21	128.17	46	0.0164398	-1.02781	0.490456
WBGene00007798		C29A12.2	Pseudogene:C29A12.2	36.35	76.8	73.56	24.39	33.86	27.09	0.00693813	-1.0272	0.490663
WBGene00011065		R06C7.6	R06C7.6	167	293	257	114	137	119	0.000224939	-1.02581	0.491135
WBGene00045067		F07C6.6	F07C6.6	10	40	27	11	6	5	0.0280688	-1.02319	0.492028
WBGene00001932	his-58	F54E12.4	F54E12.4	674.74	1036.69	811.92	286.56	492.63	521.95	0.000677768	-1.01644	0.494334
WBGene00016764		C49A9.10	C49A9.10	1113	2080	1651	786	894	881	0.000102323	-1.01518	0.494766
WBGene00008207		C49F5.3	C49F5.3	1155	2141	1746	812	930	930	8.66e-05	-1.01334	0.495399
WBGene00023318		K07D4.1	Pseudogene:K07D4.1	162.08	253.03	209.25	108.18	114.89	108.99	0.000130729	-1.01137	0.496075
WBGene00009287	psf-2	F31C3.5	F31C3.5	1867.57	2322.52	2242.57	1123.57	1230.89	1227.41	5.22e-11	-1.0106	0.496341
WBGene00007390	lmtr-3	C06H2.6	C06H2.6b	678.45	599.88	704.18	327	381.65	392.74	5.26e-11	-1.01045	0.496391
WBGene00008178		C48D1.5	C48D1.5g	137.17	175.44	207.26	90.25	82.84	104.32	2.3e-05	-1.00751	0.497403
WBGene00010473	hrg-2	K01D12.14	K01D12.14	66	94	60	16	24	51	0.0200598	-1.00667	0.497693
WBGene00050970		D2023.8	Pseudogene:D2023.8	27.79	43.27	34.15	10.72	20.94	15.14	0.0158643	-1.0058	0.497994
WBGene00019125	ddl-1	F59E12.10	F59E12.10	1154	1620	1604	832	782	800	2.06e-08	-1.00573	0.498017
WBGene00019723	fbxc-47	M02B7.1	M02B7.1	881.38	1412.96	1361.78	633.15	718.9	634.35	3.28e-06	-1.00499	0.498272
WBGene00008457		E02H1.5	E02H1.5	1767	3336	2356	1169	1497	1301	0.000308239	-1.00142	0.499508
WBGene00010483		K01G12.3	K01G12.3	410	518	567	235	290	298	8.15e-08	-1.00121	0.49958
WBGene00006976	zhp-3	K02B12.8	K02B12.8b	3602	5050	4602	2383	2667	2326	4.33e-08	-0.999175	0.500286
WBGene00022292		Y75D11A.3	Y75D11A.3	966	1013	1015	558	594	537	3.59e-12	-0.998489	0.500524
WBGene00020438		T12A2.3	T12A2.3	92	198	161	66	78	81	0.00323139	-0.997784	0.500768
WBGene00194892	dsb-2	F26H11.6	F26H11.6	2542	3583	3199	1693	1795	1705	6.56e-08	-0.997302	0.500936
WBGene00016014		C23G10.7	C23G10.7b	6276	9190	8038	4257	4702	4098	3.36e-07	-0.996225	0.50131
WBGene00007391		C06H2.7	C06H2.7b	1578	2816	2346	1103	1215	1318	6.77e-05	-0.995863	0.501436
WBGene00014064	sdz-37	ZK673.10	ZK673.10	44.68	64.28	63.5	23.45	30.65	32.64	0.0038706	-0.991327	0.503015
WBGene00009320		F32B6.3	F32B6.3	1933.78	3064.11	2809.44	1335.33	1541.25	1432.06	2.68e-06	-0.990611	0.503265
WBGene00194696		EEED8.18	EEED8.18	36	49	62	23	20	28	0.0057599	-0.989788	0.503552
WBGene00017141		EEED8.13	EEED8.13	164	252	284	99	128	143	0.000262449	-0.988919	0.503855
WBGene00009551		F38H4.10	F38H4.10	1482	2392	1988	951	1175	1097	2.06e-05	-0.987971	0.504186
WBGene00164985		ZK1010.10	ZK1010.10	202	326	255	126	128	163	0.000560157	-0.984841	0.505281
WBGene00012981		Y48B6A.10	Y48B6A.10	239.64	326.82	360.35	179.9	179.97	153.01	2.4e-06	-0.98181	0.506344
WBGene00017357		F10E9.5	F10E9.5	1788	3216	2546	1281	1427	1419	9.57e-05	-0.981225	0.506549
WBGene00045406		D1086.19	D1086.19	33	35	39	16	19	17	0.00777885	-0.979607	0.507118
WBGene00018598		F48C1.5	F48C1.5	1564	2214	1897	1030	1117	1049	6.2e-07	-0.978472	0.507517
WBGene00017674		F21F3.4	F21F3.4	496.42	755.86	622.28	301.39	356.51	376.26	4.61e-05	-0.978396	0.507544
WBGene00044112	srm-5	F47B8.12	F47B8.12	16	8	23	5	5	5	0.0366589	-0.976431	0.508235
WBGene00004353	rgs-10	F45B8.2	F45B8.2	129	106	140	59	76	70	5.83e-05	-0.9753	0.508634
WBGene00008456		E02H1.2	E02H1.2	1982	2713	2746	1367	1395	1456	4.6e-09	-0.973792	0.509166
WBGene00006546	tbx-9	T07C4.6	T07C4.6	1565	1753	1745	990	1062	847	4.31e-10	-0.972533	0.509611
WBGene00019830	hrg-1	R02E12.6	R02E12.6.2	836	997	607	307	362	597	0.00442301	-0.971974	0.509808
WBGene00017106		E02H9.9	E02H9.9	22	50	26	18	9	11	0.0327769	-0.971437	0.509998
WBGene00022773		ZK616.3	ZK616.3a	411	745	600	288	309	355	0.000390276	-0.970845	0.510207
WBGene00219275		Y39G10AR.32	Y39G10AR.32a	867	1372	996	591	670	532	0.000143343	-0.969267	0.510765
WBGene00011915		T22C1.4	T22C1.4	1706	3144	2026	1101	1380	1263	0.000708023	-0.969001	0.51086
WBGene00020349		T08B2.11	T08B2.11	535	518	626	316	335	316	1.45e-15	-0.967506	0.511389
WBGene00022399		Y97E10AR.4	Y97E10AR.4	2639	4438	3918	1977	2150	2020	1.62e-05	-0.965976	0.511932
WBGene00019917	clec-43	R07C3.1	R07C3.1	131	139	150	82	83	69	1.93e-05	-0.965677	0.512038
WBGene00017539		F17E9.2	F17E9.2	88	169	136	60	72	73	0.00322901	-0.963209	0.512915
WBGene00020778		T24E12.11	T24E12.11	218	298	287	144	153	155	7.49e-06	-0.960275	0.513959
WBGene00009713		F44G4.3	F44G4.3	509	993	660	351	407	414	0.0013805	-0.958047	0.514753
WBGene00010953	clec-190	M199.4	M199.4	535	774	646	282	330	460	0.000499486	-0.956984	0.515133
WBGene00010185		F57A10.4	F57A10.4	562.91	859.7	782.42	315.98	432.01	474.13	0.000162426	-0.956427	0.515332
WBGene00022043	psf-3	Y65B4BR.8	Y65B4BR.8	2871	5052	3379	2034	2263	1997	0.000381511	-0.954614	0.51598
WBGene00015588		C08A9.8	C08A9.8	80.41	64.27	121.57	44.83	50.52	46.02	0.00131854	-0.953862	0.516248
WBGene00009176	nmat-2	F26H9.4	F26H9.4	973	1333	1350	584	725	771	1.63e-06	-0.953219	0.516479
WBGene00043051		C29E4.13	C29E4.13c.5	2804	3749	3330	1806	2002	1899	1.01e-07	-0.952702	0.516664
WBGene00044341	ave-1	M01G5.6	M01G5.6	995	1602	1063	707	680	658	0.000348964	-0.952622	0.516693
WBGene00012074		T27A8.2	T27A8.2	289	527	389	193	223	242	0.00107647	-0.951648	0.517041
WBGene00000145	apc-11	F35G12.9	F35G12.9	1586.43	2277.79	2081.9	1053.51	1181.43	1185.59	9.08e-07	-0.947116	0.518668
WBGene00015839	math-10	C16C4.15	C16C4.15	22.35	12.19	23.18	5.06	8.26	9	0.0385688	-0.946974	0.518719
WBGene00044253		M117.6	M117.6	305.65	408.57	272.41	198.83	181.21	170.59	0.000713254	-0.946306	0.518959
WBGene00015670		C10B5.1	C10B5.1	385	607	492	264	282	291	0.000107483	-0.945966	0.519082
WBGene00013966	ztf-9	ZK287.6	ZK287.6	868	1015	1198	592	564	633	1.16e-11	-0.944844	0.519486
WBGene00009346		F32H2.10	F32H2.10	1541	2335	2218	1172	1243	1094	2.45e-06	-0.939033	0.521582
WBGene00016712		C46E10.8	C46E10.8	223	224	263	128	122	157	3.29e-06	-0.937565	0.522113
WBGene00009179	kbp-3	F26H11.1	F26H11.1	3046	5989	4369	2389	2691	2419	0.000629715	-0.937295	0.522211
WBGene00011253		R11H6.5	R11H6.5	5035	6210	6261	3300	3506	3511	1.13e-11	-0.935175	0.522979
WBGene00015229	fbxa-125	B0511.3	B0511.3	60	91	52	41	34	27	0.016496	-0.933872	0.523451
WBGene00001044	dnj-26	Y39C12A.8	Y39C12A.8	1121	2042	1659	891	935	902	0.000225902	-0.933534	0.523574
WBGene00014822		R11H6.6	Pseudogene:R11H6.6	279	225	298	157	154	154	2.75e-07	-0.932845	0.523824
WBGene00019794		M151.2	M151.2	126.23	109.06	130.57	74.29	61.59	71.1	0.00015611	-0.932441	0.523971
WBGene00011193	algn-13	R10D12.12	R10D12.12	1036	1706	1358	677	828	831	0.00016193	-0.932402	0.523985
WBGene00016791		C49H3.4	C49H3.4	466	1018	779	356	404	470	0.00280818	-0.932222	0.524051
WBGene00175030		Y53C12A.10	Y53C12A.10	1358	1896	1776	932	1010	993	2.9e-07	-0.932218	0.524052
WBGene00195239		ZK1127.13	ZK1127.13	948.68	2325.43	1557.55	822.11	919.97	872.03	0.00400021	-0.932176	0.524067
WBGene00021658		Y48G1A.2	Y48G1A.2	4062.45	5406.7	4921.68	2699.43	2952.03	2799.36	5.07e-08	-0.931946	0.524151
WBGene00013724		Y106G6H.14	Y106G6H.14	1700	1908	1974	1022	1105	1177	1.23e-11	-0.929606	0.525002
WBGene00019595		K09H9.2	K09H9.2.2	2872	3430	3801	1837	2030	2103	1.07e-12	-0.928408	0.525438
WBGene00013552	gmn-1	Y75B8A.17	Y75B8A.17	3880	4813	4184	2285	2798	2508	4.24e-07	-0.926634	0.526085
WBGene00011342		T01G5.7	T01G5.7	646	991	840	439	526	466	4.53e-05	-0.925729	0.526414
WBGene00044742		Y55F3BR.10	Y55F3BR.10	112	142	153	77	74	81	0.000100536	-0.923278	0.52731
WBGene00015843		C16C8.5	C16C8.5	522	1044	855	410	506	438	0.00115517	-0.922791	0.527488
WBGene00016353		C33F10.4	C33F10.4	829	1140	1248	565	615	691	9.78e-07	-0.922606	0.527555
WBGene00014112		ZK856.11	ZK856.11	2963	3792	3754	2019	2103	2111	6.8e-10	-0.921922	0.527805
WBGene00009493	hrg-4	F36H1.5	F36H1.5b	267	465	253	133	207	192	0.00819727	-0.921271	0.528044
WBGene00015742	kxd-1	C13F10.2	C13F10.2	463	625	578	295	360	320	4.6e-06	-0.920564	0.528302
WBGene00015898	sre-9	C17E7.3	C17E7.3	19	42	54	19	18	15	0.0313482	-0.920382	0.528369
WBGene00012221		W03C9.5	W03C9.5	1745	3335	2635	1339	1595	1454	0.000550737	-0.918936	0.528899
WBGene00001859	hil-8	T05E8.2	T05E8.2	52	63	63	29	40	27	0.00545591	-0.91837	0.529106
WBGene00017397		F12A10.8	F12A10.8	2016	2484.99	2506	1344.93	1526.96	1305.89	6.1e-10	-0.916915	0.52964
WBGene00019757	memb-2	M03E7.5	M03E7.5.2	1238	2466	1720	933	1081	1049	0.00143388	-0.91647	0.529804
WBGene00011967	pir-1	T23G7.5	T23G7.5b	501.22	883.12	710.85	342.9	322.71	499.3	0.00230522	-0.915705	0.530085
WBGene00013931	clec-97	ZK39.6	ZK39.6	675.7	975.43	797.48	490.23	440.6	496.88	5.03e-05	-0.915583	0.53013
WBGene00001792	gst-44	F13A7.10	F13A7.10	86	90	123	46	63	59	0.000576401	-0.915051	0.530325
WBGene00016303	fbxc-32	C32B5.10	C32B5.10	909	1161	1241	592	724	647	1.89e-08	-0.913517	0.530889
WBGene00013422		Y66A7A.2	Y66A7A.2b	713	1010	895	472	548	521	7.58e-06	-0.912521	0.531256
WBGene00008621		F09C8.1	F09C8.1	1076	1334	2052	462	639	1208	0.00948589	-0.912278	0.531346
WBGene00006492	let-391	C27A12.3	C27A12.3	3359	5241	4742	2344	2799	2673	1.58e-05	-0.912025	0.531439
WBGene00013527		Y73F8A.22	Y73F8A.22	18	19	10	5	8	2	0.056094	-0.910545	0.531984
WBGene00016305	fbxc-57	C32B5.12	Pseudogene:C32B5.12	49	46	61	23	34	27	0.006143	-0.910137	0.532135
WBGene00003828	nuc-1	C07B5.5	C07B5.5	3516	3956	4260	2280	2324	2459	4.5e-15	-0.909878	0.53223
WBGene00012247		W04E12.2	W04E12.2	161	262	230.99	101	159	105	0.00267945	-0.908561	0.532716
WBGene00044604		T10F2.5	T10F2.5	984	1739	1337	672	833	832	0.000606088	-0.907279	0.53319
WBGene00014041		ZK666.1	ZK666.1	18.94	27	33.32	12	15.68	9.6	0.0348411	-0.906673	0.533414
WBGene00011501	rmd-1	T05G5.7	T05G5.7a	25100	26880	27000	15161	16198	16492	1.02e-12	-0.904391	0.534258
WBGene00020783	blos-4	T24H7.4	T24H7.4.2	898	2126	1372	756	915	769	0.00550803	-0.90396	0.534418
WBGene00013453	fbxa-83	Y67A10A.4	Y67A10A.4	485	770	695	312	442	377	0.000276491	-0.902969	0.534785
WBGene00021795		Y52E8A.2	Y52E8A.2	1466	2486	1898	1108	1243	1065	0.000291209	-0.901848	0.535201
WBGene00001946	his-72	Y49E10.6	Y49E10.6b	1463.21	2668.21	602.5	688.57	688.57	946.79	0.0367099	-0.901633	0.53528
WBGene00014920		Y53F4B.38	Pseudogene:Y53F4B.38	30	48	44	16	26	20	0.0217974	-0.900188	0.535817
WBGene00007974	dhfr-1	C36B1.7	C36B1.7	3030	5297	3472	2132	2592	2128	0.00117138	-0.897575	0.536788
WBGene00045249		T07A9.15	T07A9.15	803	1568	1026	654	687	603	0.00241742	-0.896893	0.537042
WBGene00016590		C42C1.12	C42C1.12.2	928.82	1558.88	1217.71	647.23	776.17	745.13	0.000348067	-0.895734	0.537474
WBGene00006707	ubc-12	R09B3.4	R09B3.4	5524.08	5217.76	5455.04	3175.05	3334.5	3362.71	8.59e-12	-0.895492	0.537564
WBGene00006443	pak-2	C45B11.1	C45B11.1b	7661	8399	9489	5065	5450	5092	1.32e-22	-0.894429	0.53796
WBGene00002256	lbp-4	ZK742.5	ZK742.5.1	2011	4477	2854	1569	1920	1797	0.00440616	-0.893897	0.538159
WBGene00014057		ZK673.1	ZK673.1a	688.83	628.89	767.58	387.01	379.62	482.01	1.37e-07	-0.89357	0.538281
WBGene00004802	sir-2.3	F46G10.3	F46G10.3	100	140	140	61	76	81	0.00106392	-0.892776	0.538577
WBGene00017592		F19C7.2	F19C7.2	305.15	363.09	264.11	169.3	190.14	189.75	0.000583635	-0.892698	0.538606
WBGene00018955		F56C11.3	F56C11.3	721.75	1036	861.87	440.99	551.04	560.2	0.000103738	-0.892664	0.538618
WBGene00017402		F12E12.1	F12E12.1	1397	1653	1363	861	880	919	5.3e-06	-0.892202	0.538791
WBGene00018398	sptl-2	F43H9.2	F43H9.2b	1189	1565	1913	900	817	1041	3.75e-06	-0.890804	0.539313
WBGene00194642		C25H3.17	C25H3.17	212	323	247	115	176	158	0.00244364	-0.89053	0.539416
WBGene00044614		C36B1.14	C36B1.14	753	1362	1015	509	683	623	0.001392	-0.889729	0.539716
WBGene00001666	gpa-4	T07A9.7	T07A9.7	111	216	192	55	77	134	0.0232466	-0.88918	0.539921
WBGene00006618	trt-1	DY3.4	DY3.4b.3	2293	4050	3653	1742	2080	2043	0.00024192	-0.888577	0.540147
WBGene00003611	nhr-12	R04B5.4	R04B5.4c	545	1046	900	447	512	482	0.000995314	-0.888567	0.54015
WBGene00011153		R09A8.2	R09A8.2	1181	1300	1697	800	908	824	1.45e-13	-0.888318	0.540244
WBGene00010132		F55H2.7	F55H2.7.2	3522	6422	5089	2709	3171	2941	0.000475791	-0.888251	0.540269
WBGene00008747	phf-31	F13E6.3	F13E6.3	216	335	232	133	167	153	0.00227651	-0.8876	0.540512
WBGene00016404	mutd-1	C34D4.13	C34D4.13	1025	2340	1631	880	979	976	0.00434851	-0.887043	0.540721
WBGene00004987	spp-2	T08A9.12	T08A9.12	541	844	568	325	406	410	0.00148231	-0.88682	0.540805
WBGene00006704	ubc-7	F58A4.10	F58A4.10	22720	33522	25871	15727	18318	15211	7.06e-05	-0.885902	0.541149
WBGene00011916		T22C1.5	T22C1.5	2544	4692	3963	1914	2415	2225	0.000569612	-0.885802	0.541186
WBGene00008537		F02H6.4	Pseudogene:F02H6.4c	171.15	185.42	209.19	133.12	95.09	104.59	0.000149802	-0.885726	0.541215
WBGene00010957	nduo-6	MTCE.3	MTCE.3	375	1694	469	304	469	410	NA	-0.884207	0.541785
WBGene00019197		H14A12.5	H14A12.5	109	170	177	74	94	94	0.00146545	-0.883298	0.542127
WBGene00015357		C02F12.8	C02F12.8	1618	1443	1931	1003	1045	1011	4.57e-20	-0.883159	0.542179
WBGene00014018		ZK632.11	ZK632.11	2744	4870	3843	2161	2450	2161	0.000401841	-0.882892	0.542279
WBGene00007014	mdt-10	T09A5.6	T09A5.6.1	888	1668	1360	741	799	752	0.000758618	-0.882758	0.542329
WBGene00044690		M02B7.7	M02B7.7	430.21	655.58	577.25	319.09	333.75	339.98	8.19e-05	-0.881845	0.542673
WBGene00009173	prom-1	F26H9.1	F26H9.1	4868.97	5495.63	6277.44	3192.55	3548.42	3479.61	5.01e-17	-0.881681	0.542735
WBGene00010958	ndfl-4	MTCE.4	MTCE.4	160	1198	90	51	86	78	NA	-0.878393	0.543973
WBGene00018335		F42A9.6	F42A9.6b	1309	2689	2154	1048	1301	1222	0.00207221	-0.876778	0.544582
WBGene00044762		ZK688.11	ZK688.11	1257	2114	1760	870	1138	1039	0.000399948	-0.876298	0.544764
WBGene00009006		F21D5.1	F21D5.1	11673	13841	16147	7970	9026	8597	6.86e-14	-0.87538	0.54511
WBGene00009735		F45G2.9	F45G2.9	209	297	363	165	162	185	0.000141918	-0.874425	0.545471
WBGene00015747		C13G5.2	C13G5.2	2950	5560	4109	2256	2634	2552	0.00116953	-0.874329	0.545508
WBGene00013026		Y49A3A.3	Y49A3A.3	1202	1506	1490	803	837	926	1.17e-07	-0.874008	0.545629
WBGene00015347	cids-1	C02F5.4	C02F5.4	4757	5594	5722	3220	3525	3193	8.95e-12	-0.872433	0.546225
WBGene00018427		F44E7.5	F44E7.5a	1695	1607	1985	1052	1143	1082	1.13e-22	-0.872252	0.546293
WBGene00000143	apc-2	K06H7.6	K06H7.6	3486	4162	5083	2560	2651	2601	3.22e-13	-0.872041	0.546373
WBGene00001864	him-5	D1086.4	D1086.4a	1336	2282	1721	981	1111	1093	0.000570419	-0.871311	0.54665
WBGene00013041	pstk-1	Y49E10.22	Y49E10.22	190	340	301	155	164	167	0.0016305	-0.868717	0.547633
WBGene00011898		T21C9.13	T21C9.13	7346	11145	11317	5313	6265	6428	1.56e-05	-0.868706	0.547638
WBGene00011000		R03G8.6	R03G8.6	1991	3060	2823	1472	1687	1613	2.39e-05	-0.868408	0.547751
WBGene00022791		ZK686.1	ZK686.1.1	3694	5903	4661	2691	3038	2887	0.000155004	-0.868164	0.547844
WBGene00008363		D1046.2	D1046.2.2	2552	3511	3525	1927	2080	1874	2.17e-07	-0.866607	0.548435
WBGene00045407		T07D4.5	T07D4.5	1727	2915	2508	1320	1512	1464	0.000208299	-0.866606	0.548436
WBGene00013254	tag-276	Y57A10A.9	Y57A10A.9	215	228	252	136	157	131	2.57e-06	-0.866375	0.548524
WBGene00007100		B0024.10	B0024.10	3704.01	4485.85	4840.33	2600.05	2702.47	2765	7.44e-12	-0.865466	0.548869
WBGene00013380		Y62E10A.14	Y62E10A.14	4229.01	4490.04	5220.03	2861.49	3047.54	2792.82	4.2e-24	-0.864114	0.549384
WBGene00009329		F32D8.4	F32D8.4	1513	2928	2275	1156	1460	1356	0.00177381	-0.862882	0.549853
WBGene00003917	par-2	F58B6.3	F58B6.3c	429.39	351.84	333.89	276.52	187.67	197.24	0.00179739	-0.862239	0.550098
WBGene00004279	rab-21	T01B7.3	T01B7.3	1847	2469	2506	1305	1464	1433	1.28e-07	-0.862009	0.550186
WBGene00017676		F21F3.7	F21F3.7	2146	2651	2444	1420	1598	1470	1.39e-07	-0.861951	0.550208
WBGene00017459		F14D2.11	F14D2.11	176	432	252	157	158	164	0.0178525	-0.860425	0.55079
WBGene00044310		H20J04.9	H20J04.9	541	912	781	417	475	451	0.000430403	-0.859525	0.551134
WBGene00044319	tag-266	W06E11.5	W06E11.5a	1992	1939	2060	1295	1145	1286	2.24e-09	-0.859219	0.551251
WBGene00001574	gei-17	W10D5.3	W10D5.3b	726.86	228.45	452.33	141.65	369.97	203.55	0.0431087	-0.857732	0.551819
WBGene00018660		F52C6.3	F52C6.3	210.66	392.09	349.3	180.94	186.88	193.3	0.00231399	-0.857064	0.552075
WBGene00011872	blos-1	T20G5.10	T20G5.10	1711.75	2350.94	2074.13	1175.24	1327.89	1283.84	6.63e-06	-0.856897	0.552139
WBGene00019011		F57C9.4	F57C9.4c	5631	7425	7530	4104	4474	4204	1.67e-08	-0.855883	0.552527
WBGene00011062		R06C7.2	R06C7.2	1118	1118	1365	741	783	731	3.47e-20	-0.855797	0.55256
WBGene00043156		C27F2.9	C27F2.9	2329	4323	3593	1895	2150	2100	0.000799547	-0.855433	0.552699
WBGene00020064	kbp-1	R13F6.1	R13F6.1	1053	2489	1700	853	1099	1073	0.00864464	-0.855016	0.552859
WBGene00022398		Y97E10AR.3	Y97E10AR.3	2072	3800	3244	1682	1983	1812	0.000691391	-0.854522	0.553049
WBGene00017770		F25B4.7	F25B4.7	1920	3085	3150	1407	1732	1786	0.000149802	-0.854509	0.553054
WBGene00008118	madf-8	C46F11.3	C46F11.3	1661	2613	2218	1241	1372	1353	0.000102234	-0.854508	0.553054
WBGene00219849		C36C9.10	C36C9.10	15947	18187	9511	6508	11604	7344	0.0127939	-0.853245	0.553538
WBGene00020528	lgc-54	T15B7.16	T15B7.16	119	185	244	92	103	121	0.00335475	-0.853228	0.553545
WBGene00019254		H31G24.3	H31G24.3	1134.78	1507.46	1454.48	788.15	901.45	850.8	7.85e-07	-0.852894	0.553673
WBGene00020434		T11F8.2	Pseudogene:T11F8.2	156	267	273	117	143	149	0.00227349	-0.852845	0.553692
WBGene00019013	tofu-4	F57C9.7	F57C9.7	912	898	1039	592	626	571	9.85e-15	-0.851547	0.55419
WBGene00007114	mttu-1	B0035.16	B0035.16	419	851	627	318	405	391	0.00506109	-0.851445	0.554229
WBGene00017364	clec-7	F10G2.3	F10G2.3	280	370	360	186	229	205	3.7e-05	-0.850596	0.554556
WBGene00017832	kbp-2	F26F4.13	F26F4.13	852	1543	1334	657	855	727	0.00115041	-0.849485	0.554983
WBGene00015766		C14C11.2	C14C11.2.2	3143.75	3568.01	3890.49	2334.79	2305.18	2012.85	1.42e-11	-0.848788	0.555251
WBGene00007273		C03C10.7	C03C10.7	132.57	217.41	143.21	85.56	108.18	95.33	0.00856991	-0.847056	0.555918
WBGene00019576		K09E3.5	K09E3.5	241	332	313	156	188	197	0.000218947	-0.845626	0.556469
WBGene00018446	ceh-83	F45C12.15	F45C12.15.3	1289	1721	1639	882	1073	943	2.92e-06	-0.843842	0.557158
WBGene00010459	slc-25A32	K01C8.7	K01C8.7a	548	1139	896	463	548	520	0.0041019	-0.843778	0.557182
WBGene00045434		Y95D11A.3	Y95D11A.3	1782	2478	2336	1286	1451	1373	2.95e-06	-0.843329	0.557356
WBGene00012651	orc-4	Y39A1A.13	Y39A1A.13	2127	2995	2861	1585	1710	1677	2.47e-06	-0.843045	0.557466
WBGene00021153		Y4C6A.3	Y4C6A.3	3973	5561	5608	2917	3183	3318	1.68e-06	-0.842413	0.55771
WBGene00021750		Y50D4C.6	Y50D4C.6	1400	1501	1699	987	993	930	6.4e-16	-0.841475	0.558073
WBGene00010194	btb-19	F57C2.2	F57C2.2	1970.07	2967.11	2639.1	1379.65	1700.83	1605.14	7.36e-05	-0.841446	0.558084
WBGene00015001		B0025.4	B0025.4	1320	1992	1793	1046	1096	1021	3.69e-05	-0.841114	0.558213
WBGene00021648	mis-12	Y47G6A.24	Y47G6A.24a	2111	2439	2064	1321	1547	1283	1.28e-05	-0.840478	0.558458
WBGene00045414		T19H5.7	T19H5.7	97	187	192	95	85	95	0.00779372	-0.840007	0.558641
WBGene00020093		R144.3	R144.3b	714	1410	1138	565	723	664	0.00311466	-0.839644	0.558781
WBGene00008464		E02H4.6	E02H4.6	1105	1237	1351	658	832	829	6.62e-08	-0.838522	0.559216
WBGene00018513		F46F11.10	F46F11.10	797	862	1101	582	580	575	2.77e-13	-0.837764	0.55951
WBGene00045270		C04E7.5	C04E7.5	47	83	42	35	34	21	0.0498549	-0.836755	0.559902
WBGene00219715	anr-18	M02B7.9	M02B7.9	84.41	187.46	163.96	64.77	99.35	81.67	0.0204623	-0.836701	0.559922
WBGene00016138	flh-2	C26E6.2	C26E6.2	1794	1816	2320	1175	1248	1325	2.97e-16	-0.836509	0.559997
WBGene00013725	ska-1	Y106G6H.15	Y106G6H.15	1968	2869	2755	1415	1715	1600	1.86e-05	-0.835215	0.5605
WBGene00019153		H04M03.3	H04M03.3	1528	1472	1874	915	1085	1083	7.12e-13	-0.834446	0.560798
WBGene00010963	nduo-4	MTCE.25	MTCE.25	11452	40721	20132	11865	16047	11908	0.0362495	-0.834281	0.560863
WBGene00010436		JC8.4	JC8.4	384	540	456	278	304	275	0.000164088	-0.83415	0.560913
WBGene00010229		F58A4.6	F58A4.6	941	1411	1206	702	797	715	0.000107614	-0.833525	0.561157
WBGene00013799	athp-3	Y116A8C.22	Y116A8C.22	96	150	133	74	66	85	0.00528429	-0.832633	0.561503
WBGene00019076	mrpl-24	F59A3.3	F59A3.3	1551	2357	2062	1129	1311	1277	9.41e-05	-0.832016	0.561744
WBGene00012732		Y40B1A.1	Y40B1A.1a	1480	2016	1499	987	1099	1035	0.000251742	-0.831858	0.561805
WBGene00011367	snpc-3.4	T02C12.2	T02C12.2	2066	3605	3121	1703	1862	1844	0.000496566	-0.831178	0.56207
WBGene00021070	cpr-8	W07B8.1	W07B8.1	887	949	777	562	580	501	9.57e-05	-0.830523	0.562325
WBGene00198190		F25H2.16	F25H2.16	93.25	92.22	94.14	47.04	40.04	74.14	0.014349	-0.830228	0.562441
WBGene00010767	blos-9	K11B4.2	K11B4.2	1099	1518	1355	775	853	866	1.86e-05	-0.830025	0.56252
WBGene00008288		C54C6.6	C54C6.6	996	1771	1707	861	941	933	0.000631917	-0.829621	0.562677
WBGene00009769		F46B6.4	F46B6.4	1159	1210	1518	756	855	860	1.02e-13	-0.827054	0.563679
WBGene00008442		E01B7.2	E01B7.2	1243	2287	1888	1007	1183	1129	0.00143159	-0.826584	0.563863
WBGene00016443		C35D10.6	C35D10.6	2320	3324	3287	1769	1931	1917	4.85e-06	-0.82614	0.564036
WBGene00008403		D2013.3	D2013.3	154	263	232	116	149	127	0.0035246	-0.825669	0.564221
WBGene00018014		F33G12.2	F33G12.2	920	1745	1445	715	880	906	0.00273313	-0.823708	0.564988
WBGene00016567		C41D11.9	C41D11.9	352	597	523	297	320	289	0.00100754	-0.823365	0.565122
WBGene00011691		T10C6.10	T10C6.10b	1697.73	1976.6	2213.3	1117.49	1258.99	1363.99	8e-09	-0.823301	0.565147
WBGene00021701		Y48G9A.7	Y48G9A.7	12	22	20	5	10	9	0.0808411	-0.823024	0.565256
WBGene00022250		Y73B6BL.29	Y73B6BL.29a	694	987	996	512	573	594	2.23e-05	-0.822733	0.56537
WBGene00020858	mop-25.3	T27C10.3	T27C10.3	1261	1450	1500	900	951	843	9.3e-10	-0.82195	0.565677
WBGene00044666		F33G12.7	F33G12.7	728	1186	860	526	645	546	0.00176228	-0.821726	0.565765
WBGene00005061	sra-35	B0304.8	B0304.8	20	29	22	7	17	10	0.0748036	-0.820448	0.566266
WBGene00008537		F02H6.4	Pseudogene:F02H6.4a	1600.66	1788.58	2150.81	994.99	1150.65	1350.41	7.97e-07	-0.820198	0.566364
WBGene00016701		C46A5.5	C46A5.5b	1183	1638	1669	879	1004	961	3.63e-06	-0.817392	0.567467
WBGene00006466	tag-115	JC8.13	JC8.13a	2259.21	3065.77	2728.54	1682.65	1844.18	1597.46	1.1e-05	-0.817292	0.567506
WBGene00017538	ceh-49	F17A9.6	F17A9.6	1451	1653	1775	995	1105	1039	2.2e-11	-0.815464	0.568226
WBGene00022762		ZK546.5	ZK546.5	2113	2698	2690	1595	1602	1603	6.48e-08	-0.81537	0.568263
WBGene00016754	cebp-2	C48E7.11	C48E7.11	2103	2406	2143	1398	1490	1386	1.41e-06	-0.814181	0.568731
WBGene00022586		ZC308.4	ZC308.4b	5757	9879	8393	4563	5295	5155	0.000582332	-0.814105	0.568761
WBGene00009648	zhit-2	F43C1.3	F43C1.3	832	1253	1170	605	723	719	0.000141834	-0.814024	0.568793
WBGene00007026	mdt-31	F32H2.2	F32H2.2b	490	1017	796	442	466	489	0.00592085	-0.813474	0.56901
WBGene00014020		ZK632.14	ZK632.14	1155	1986	1717	885	1069	1067	0.000974267	-0.81328	0.569087
WBGene00019340		K02F6.6	K02F6.6	11	7	9	3	3	3	NA	-0.812514	0.569389
WBGene00185088		Y55F3BL.4	Y55F3BL.4	566	923	773	455	507	453	0.000697252	-0.81249	0.569398
WBGene00022092		Y69A2AR.21	Y69A2AR.21	2373	3041	2593	1659	1740	1727	1.14e-05	-0.812202	0.569512
WBGene00017450	bath-27	F14D2.1	F14D2.1	722.79	1451.89	1229.9	648.45	724.6	708.6	0.00364178	-0.812025	0.569582
WBGene00020376		T09B4.2	T09B4.2.1	2005	3255	3116	1572	1924	1756	0.000249272	-0.811578	0.569758
WBGene00008036		C40C9.3	C40C9.3	25	25	20	14	14	6	0.0779984	-0.81125	0.569888
WBGene00011017		R04F11.5	R04F11.5	1247	2141	1628	981	1103	1049	0.00138021	-0.811233	0.569895
WBGene00017002		D1007.4	D1007.4	776	1418	1207	618	717	765	0.00225622	-0.810115	0.570337
WBGene00019402		K04G7.11	K04G7.11	3746	5067	4796	2706	3073	2934	2.52e-06	-0.810094	0.570345
WBGene00018071		F35H10.6	F35H10.6	1245	2164	1592	972	1103	1045	0.00189273	-0.810091	0.570346
WBGene00011741		T12G3.6	T12G3.6b	7663	12686	11132	5970	7259	6580	0.000376119	-0.80919	0.570702
WBGene00001486	frh-1	F59G1.7	F59G1.7	643	1021	934	486	594	551	0.000410202	-0.809186	0.570704
WBGene00009650	ccnk-1	F43D2.1	F43D2.1	3620	5678	4992	2679	3230	3125	0.000220452	-0.808083	0.57114
WBGene00021246		Y22D7AL.7	Y22D7AL.7	994	1110	1251	696	716	753	2.38e-11	-0.807727	0.571281
WBGene00012483		Y18D10A.16	Y18D10A.16	1963	2814	2313	1489	1548	1485	9.68e-05	-0.807358	0.571427
WBGene00045175		C10C6.9	Pseudogene:C10C6.9	716.77	970.61	687.27	437.69	568.86	491.38	0.00169662	-0.806705	0.571686
WBGene00004334	ref-1	T01E8.2	T01E8.2	295	252	292	146	167	213	0.000556676	-0.806614	0.571722
WBGene00015355		C02F12.5	C02F12.5	485	1024	737	400	482	482	0.00923215	-0.806479	0.571776
WBGene00000409	cdk-8	F39H11.3	F39H11.3	4589.28	6191.38	6687.02	3545.61	3810.12	3825.29	3.11e-07	-0.806284	0.571853
WBGene00018671		F52C6.14	Pseudogene:F52C6.1	108	197	155	97	100	80	0.0112594	-0.806205	0.571884
WBGene00010847		M04B2.4	M04B2.4	2226	3671	3252	1852	2023	1899	0.000307595	-0.806043	0.571948
WBGene00016676		C45G9.5	C45G9.5	2940.49	4330.22	4235.13	2269.78	2597.41	2463.54	2.17e-05	-0.805638	0.572109
WBGene00000264	brc-1	C36A4.8	C36A4.8b	3313	3478.24	4029	2257	2528	2249.96	9.59e-18	-0.805346	0.572225
WBGene00017017		D1014.4	D1014.4	918	1667	1385	794	824	855	0.00171488	-0.805344	0.572225
WBGene00022273		Y73E7A.6	Y73E7A.6.2	2127	2569	2204	1528	1515	1404	1.06e-05	-0.80505	0.572342
WBGene00018835		F54F2.7	F54F2.7	512	869	602	384	447	404	0.00373985	-0.805007	0.572359
WBGene00019692		M01A10.1	M01A10.1	3170	3527	4077	2281	2447	2270	8.24e-17	-0.803958	0.572775
WBGene00018909	slx-1	F56A3.2	F56A3.2	3101	3635	4126	2197	2467	2366	7.47e-12	-0.803883	0.572805
WBGene00017358		F10E9.7	F10E9.7.2	3042	4966	3975	2298	2720	2559	0.000649415	-0.803882	0.572806
WBGene00021785		Y51H7C.7	Y51H7C.7	1368	2550	1693	1028	1294	1156	0.00565962	-0.803767	0.572852
WBGene00077537		Y47H10A.6	Pseudogene:Y47H10A.6	177.99	358.07	229.75	130.95	197.79	125.76	0.0243604	-0.803565	0.572931
WBGene00015353		C02F5.13	C02F5.13	1165.41	2133.23	1670.37	886	1141.72	1064.37	0.00300687	-0.803254	0.573055
WBGene00022885		ZK1248.19	ZK1248.19	334	720	583	273	395	318	0.0121154	-0.802856	0.573213
WBGene00012210		W02D9.4	W02D9.4	922	1220	1126	707	687	705	8.82e-06	-0.802819	0.573228
WBGene00012481		Y18D10A.11	Y18D10A.11	12321	11679	12657	8122	8130	7653	5.31e-12	-0.802499	0.573355
WBGene00001027	dnj-9	F11G11.7	F11G11.7	2762	3929	3709	2201	2301	2169	9.68e-06	-0.802366	0.573408
WBGene00012278		W05B10.3	W05B10.3	9	10	10	3	2	5	NA	-0.802187	0.573479
WBGene00021649		Y47G6A.25	Y47G6A.25	2824	3585	3895	2140	2373	2141	1.25e-08	-0.801431	0.57378
WBGene00013876	ceh-74	ZC376.4	ZC376.4	286	463	421	216	239	274	0.00176897	-0.801365	0.573806
WBGene00019795		M151.3	M151.3	604	535	694	392	414	380	1.57e-10	-0.801188	0.573877
WBGene00013566		Y75B12A.2	Y75B12A.2	19	12.02	25	7.89	12	7.95	0.0872065	-0.800976	0.573961
WBGene00018845		F54H12.5	F54H12.5	325	748	676	299	388	359	0.013026	-0.800451	0.57417
WBGene00013259	trpp-5	Y57A10A.16	Y57A10A.16	1182	1899	1456	953	964	957	0.000888657	-0.800317	0.574223
WBGene00016460		C35E7.8	C35E7.8	633.72	851.79	824.21	520.41	537.69	418.63	7.09e-05	-0.799189	0.574672
WBGene00021832		Y54E10A.12	Y54E10A.12	4096.61	4744.86	4909	3071.65	3112.7	2774.64	6.37e-10	-0.797967	0.575159
WBGene00001740	gro-1	ZC395.6	ZC395.6	905	1445	1399	740	782	849	0.000316044	-0.797949	0.575166
WBGene00019129		F59G1.8	F59G1.8b	1326	1621	1609	1010	1020	926	1.25e-07	-0.797936	0.575171
WBGene00011131		R07H5.11	R07H5.11a	526.17	601.53	582.73	354.39	403.94	350.76	2.57e-06	-0.79718	0.575473
WBGene00045394		ZK813.7	ZK813.7.1	17995	22544	21601	13141	14197	13087	9.91e-08	-0.797164	0.575479
WBGene00003676	nhr-86	Y40B10A.8	Y40B10A.8.2	1960	2315	2407	1399	1518	1436	6.25e-10	-0.79707	0.575517
WBGene00012485	fbxa-121	Y18D10A.18	Pseudogene:Y18D10A.18	58	101	110	51	60	49	0.0153378	-0.795908	0.575981
WBGene00077787		T05E12.10	T05E12.10	108	121	118	80	81	54	0.00508935	-0.795029	0.576332
WBGene00003161	mdf-2	Y69A2AR.30	Y69A2AR.30c	4895.81	6770.41	5838.92	3532.21	4070.82	3711.66	3.64e-05	-0.794799	0.576424
WBGene00011892		T21C9.4	T21C9.4	5725	8413	6842	4158	4852	4483	0.000195342	-0.794396	0.576585
WBGene00011431		T04D3.1	T04D3.1	785	904	890	514	567	595	9.06e-07	-0.793526	0.576933
WBGene00007023	mdt-27	T18H9.6	T18H9.6	3987	4778	5393	2939	3156	3134	4.1e-11	-0.792417	0.577376
WBGene00000829	ctb-1	MTCE.21	MTCE.21	65228	176606	111770	67552	81818	62879	0.0228385	-0.792305	0.577421
WBGene00013141		Y53C12A.6	Y53C12A.6b	499	523	535	324	363	328	3.71e-07	-0.791486	0.577749
WBGene00013530	ntl-11	Y73F8A.25	Y73F8A.25c	78.5	121.08	62.24	47.17	60.68	45.82	0.0435933	-0.790192	0.578267
WBGene00206491		Y73F8A.1173	Pseudogene:Y73F8A.1173	478.39	606.3	575.88	335.46	381.49	359.53	1.49e-05	-0.790122	0.578295
WBGene00194852		T28A8.8	T28A8.8a	150	248	176	104	106.83	141	0.0139911	-0.789972	0.578355
WBGene00000785	cpr-5	W07B8.5	W07B8.5	30206	21423	26304	16085	14772	19153	0.000165531	-0.789904	0.578382
WBGene00008143		C47E8.4	C47E8.4a.2	2659	4071	3265	2070	2179	2177	0.000361366	-0.789691	0.578468
WBGene00010325	exos-3	F59C6.4	F59C6.4	2749	3935	3499	1918	2385	2266	0.000107729	-0.789647	0.578486
WBGene00015916		C17G10.2	C17G10.2	2701	3828	4150	2257	2290	2333	5.35e-06	-0.789493	0.578547
WBGene00009128	mrpl-54	F25H5.6	F25H5.6.1	1065	1509	1103	704	879	775	0.00124993	-0.789226	0.578654
WBGene00012674	bed-1	Y39B6A.12	Y39B6A.12b	954	888	1271	629	707	686	6.44e-11	-0.789198	0.578666
WBGene00194678		R10D12.18	R10D12.18	20	19	13	12	2	5	0.10637	-0.788971	0.578757
WBGene00020910	dgtr-1	W01A11.2	W01A11.2	2883	3311	3531	1984	2093	2283	2.96e-09	-0.788659	0.578882
WBGene00009923		F52B5.7	F52B5.7	610	1037	923	536	583	511	0.00112797	-0.788606	0.578903
WBGene00019221		H20J04.6	H20J04.6	681	915	950	521	516	602	2.51e-05	-0.788536	0.578931
WBGene00019264		H35B03.2	H35B03.2b	1162.6	1361.93	1669.81	955.66	898.38	870.47	2.37e-09	-0.788413	0.578981
WBGene00194821	dmsr-16	T27B2.1	T27B2.1	22.11	67	58.97	18	21	34	0.085594	-0.788221	0.579058
WBGene00006996	zyg-11	C08B11.1	C08B11.1	10264	10679	13639	7322	7977	7394	5.65e-24	-0.788196	0.579068
WBGene00015815		C16A11.2	C16A11.2a.2	2474	3059	3106	1804	1958	1889	2.27e-08	-0.788196	0.579068
WBGene00022726	nhr-249	ZK381.3	ZK381.3.1	7	13	9	1	4	4	NA	-0.787646	0.579288
WBGene00013231	tsen-2	Y56A3A.11	Y56A3A.11	815	1458	1272	658	744	829	0.00262391	-0.786685	0.579675
WBGene00007758		C27A7.8	C27A7.8b	223	433	332	144	208	245	0.0199531	-0.786179	0.579878
WBGene00007649		C17G1.2	C17G1.2	1346	2411	1939	1160	1343	1108	0.00235558	-0.786059	0.579926
WBGene00012900		Y46G5A.8	Y46G5A.8	173	230	215	133	143	119	0.000670633	-0.785448	0.580172
WBGene00004180	pri-1	F58A4.4	F58A4.4b	3733.84	4388.47	4527	2640.49	2973.18	2702.98	1.32e-09	-0.7854	0.580191
WBGene00011752	fbxa-2	T13F3.5	T13F3.5	86	154	140	73	65	91	0.0172887	-0.785217	0.580265
WBGene00020771		T24E12.1	T24E12.1	414	500	528	265	339	330	2.08e-05	-0.784814	0.580427
WBGene00022771		ZK616.1	ZK616.1.1	40	49	71	23	25	42	0.0436935	-0.784654	0.580491
WBGene00016947		C55B7.11	C55B7.11	2268.04	3230.19	2784.04	1761.6	1978.98	1633.85	0.000119624	-0.784585	0.580519
WBGene00006740	ulp-5	K02F2.4	K02F2.4	966	966	1198	678	745	632	1.19e-12	-0.784393	0.580596
WBGene00010690		K08H2.3	K08H2.3	543	548	713	384	382	411	5.68e-10	-0.784314	0.580628
WBGene00220163		Y47D3A.35	Y47D3A.35	211	179	164	119	123	111	0.00260241	-0.783926	0.580784
WBGene00012919		Y46G5A.34	Y46G5A.34	122.51	134.63	106	72.19	65.33	88	0.0103187	-0.783455	0.580974
WBGene00019924	fbxc-33	R07C3.8	R07C3.8	194	251	285	144	181	142	0.000296298	-0.782316	0.581433
WBGene00021392		Y38A10A.7	Y38A10A.7	1853	3256	2618	1558	1856	1512	0.00213146	-0.781875	0.581611
WBGene00020050		R13A5.7	R13A5.7	1371	1455	1789	1039	1067	929	5.34e-13	-0.780972	0.581975
WBGene00019458		K06H7.7	K06H7.7	1131	1622	1519	941	998	833	8.04e-05	-0.780725	0.582074
WBGene00018636		F49E8.2	F49E8.2b	5300	7962	7427	3949	4940	4505	0.000142617	-0.780441	0.582189
WBGene00044953		D2096.13	D2096.13	42	86	67	21	35	50	0.0697776	-0.780334	0.582232
WBGene00015939		C18A3.1	C18A3.1	738	1222	1163	619	713	666	0.000714272	-0.779685	0.582494
WBGene00007125		B0250.8	B0250.8	33	26	32	21	15	15	0.0565097	-0.779286	0.582655
WBGene00013967		ZK287.7	ZK287.7.2	1582	2385	1980	1206	1392	1262	0.000365928	-0.777728	0.583285
WBGene00010149		F56D5.5	F56D5.5	213	329	350	182	194	192	0.000933998	-0.777184	0.583505
WBGene00044466		Y48A5A.3	Y48A5A.3a	816	1077	905	589	681	556	0.000215719	-0.776758	0.583677
WBGene00010608		K07A1.1	K07A1.1	2988	5870	4123	2623	2982	2617	0.00634573	-0.776719	0.583693
WBGene00010699	trpp-6	K08H10.9	K08H10.9	1501	3211	2387	1399	1572	1478	0.00875116	-0.776643	0.583724
WBGene00001036	dnj-18	T04A8.9	T04A8.9.2	1928.04	2782.59	2553.2	1575.85	1612.63	1554.04	4.41e-05	-0.77626	0.583878
WBGene00020411		T10E9.1	T10E9.1	1661	2777	2646	1444	1549	1562	0.000584202	-0.774686	0.584516
WBGene00019898		R05G6.4	R05G6.4	1893.94	2120.95	2568.92	1450.96	1436.96	1459.87	1.57e-13	-0.774566	0.584565
WBGene00018998	flap-1	F57B9.7	F57B9.7a	2861	4193	3917	2300	2558	2308	5.25e-05	-0.77419	0.584717
WBGene00220246		ZK858.10	ZK858.10	675	489	615	456	306	374	0.00166495	-0.774103	0.584752
WBGene00015768		C14C11.4	C14C11.4	225	210	332	158	129	194	0.00202732	-0.773702	0.584914
WBGene00015014	bath-24	B0047.3	B0047.3	157	200	228	117	131	129	0.000242821	-0.773512	0.584992
WBGene00008196		C49C3.6	C49C3.6	2448	3844	3097	1789	2275	2019	0.00100582	-0.773425	0.585027
WBGene00009086		F23D12.2	F23D12.2	934	705	1287	552	627	688	0.000163053	-0.77328	0.585086
WBGene00016779	sdz-7	C49D10.11	C49D10.11.2	31	42	38	20	24	21	0.043015	-0.772166	0.585538
WBGene00016623	psmd-9	C44B7.1	C44B7.1	1527.52	2430.37	2176.34	1135.96	1478.37	1352.33	0.000830133	-0.771387	0.585854
WBGene00185089		C16A11.10	C16A11.10	436.99	652.18	596.67	372	416.66	297.63	0.001392	-0.770674	0.586144
WBGene00007585		C14C10.2	C14C10.2a	690	1349	1059	601	670	691	0.00642826	-0.770422	0.586246
WBGene00008008		C38D4.9	C38D4.9	337	640	526	297	347	307	0.00646505	-0.77009	0.586381
WBGene00017287		F09E5.9	F09E5.9	343.68	543.59	325.51	199.13	300.22	261.68	0.0183062	-0.769623	0.586571
WBGene00010619		K07A1.15	K07A1.15	193.32	434.39	283.9	170.46	198.4	190.97	0.0257761	-0.769441	0.586645
WBGene00017556		F18A12.7	F18A12.7	105	161	154	91	101	72	0.00766421	-0.769423	0.586652
WBGene00007644		C17E4.4	C17E4.4	519	965	693	450	535	395	0.00932204	-0.768632	0.586974
WBGene00019535	tsen-34	K08D10.12	K08D10.12a	739	746	730	503	483	483	2.64e-06	-0.767988	0.587236
WBGene00021378		Y37E11B.6	Y37E11B.6	770	1072	870	536	630	609	0.000525742	-0.767572	0.587405
WBGene00022775		ZK616.5	ZK616.5	4826.46	4670.42	5704.01	3399.96	3397.41	3363.5	4.24e-25	-0.767204	0.587555
WBGene00015029		B0207.6	B0207.6	1481	2298	2266	1250	1360	1327	0.000179057	-0.766908	0.587675
WBGene00020729		T23E1.2	Pseudogene:T23E1.2	282.04	563.26	462.86	236.46	298.08	286.96	0.0110559	-0.766767	0.587733
WBGene00011969		T23G11.4	T23G11.4	1742	2504	2311	1398	1464	1452	5.69e-05	-0.765172	0.588383
WBGene00014256		ZK1320.7	ZK1320.7	1030	1733	1538	885	931	968	0.00115296	-0.764992	0.588457
WBGene00021131		W10D9.3	W10D9.3	153	295	250	119	153	162	0.0156513	-0.764798	0.588536
WBGene00010248		F58D5.9	F58D5.9	194	220	251	160	145	129	0.000109978	-0.764407	0.588695
WBGene00021925	immp-2	Y55F3AM.8	Y55F3AM.8b	928	1144	1159	712	753	681	4.49e-07	-0.763867	0.588916
WBGene00011410		T04A8.8	T04A8.8	7101	12672	10090	5616	7280	6380	0.00315365	-0.763851	0.588922
WBGene00013695	epg-8	Y106G6A.2	Y106G6A.2c	2786.86	4698.19	3501.8	2270.37	2402.95	2465.34	0.00237958	-0.7628	0.589351
WBGene00013244		Y56A3A.33	Y56A3A.33	191.54	145.85	190.64	125.35	118.64	97.04	0.00133199	-0.761859	0.589736
WBGene00021827	dnc-6	Y54E10A.5	Y54E10A.5.2	2068	3224	2798	1699	1697	1893	0.000548967	-0.761652	0.58982
WBGene00001935	his-61	F55G1.10	F55G1.10	654.4	786.38	604.43	446.09	435.72	464.97	0.000872769	-0.76143	0.589911
WBGene00005058	sra-32	B0304.5	B0304.5	7	17	14	6	3	6	NA	-0.761032	0.590074
WBGene00050937		R02D5.8	R02D5.8	563	638	641	366	427	431	4.61e-06	-0.760564	0.590266
WBGene00022128		Y71F9B.6	Y71F9B.6b	1818.41	1901.75	2608.11	1193.41	1455.1	1518.32	3.88e-07	-0.760559	0.590268
WBGene00014027	tpk-1	ZK637.9	ZK637.9b	213	292	328	143	195	198	0.00162711	-0.760372	0.590344
WBGene00013447	nars-2	Y66D12A.23	Y66D12A.23.2	1458	1852	1762	1081	1145	1151	3.31e-06	-0.759566	0.590674
WBGene00010000		F53F8.3	F53F8.3	1619.99	2417	2129.98	1240.95	1450.97	1370.97	0.000286039	-0.758829	0.590976
WBGene00019218	madf-3	H20J04.3	H20J04.3	1140	1683	1675	964	1055	942	9.24e-05	-0.758084	0.591281
WBGene00007144		B0334.4	B0334.4	5134	8058	7202	4148	4600	4648	0.000366294	-0.758084	0.591281
WBGene00018830	ska-3	F54E7.8	F54E7.8	3797	4048	4342	2577	2846	2773	8.42e-12	-0.757712	0.591434
WBGene00019989		R09F10.8	R09F10.8	5094	5855	6104	3643	4020	3789	3.64e-10	-0.757417	0.591554
WBGene00011123	nuaf-3	R07H5.3	R07H5.3c	872	1217	1088	665	691	743	0.000158379	-0.757221	0.591635
WBGene00008789		F14D7.2	F14D7.2	3932	4877	4831	2743	3082	3269	2.18e-06	-0.757083	0.591691
WBGene00021721		Y49F6B.9	Y49F6B.9a	991	1222	1331	740	834	788	1.26e-07	-0.756912	0.591762
WBGene00006466	tag-115	JC8.13	JC8.13b	470.79	229.23	490.46	130.35	218.82	340.54	0.0546608	-0.75586	0.592193
WBGene00010781		K11H3.4	K11H3.4	1330	1700	1821	1002	1111	1117	7.93e-07	-0.755141	0.592488
WBGene00007434	arp-6	C08B11.6	C08B11.6	2136	3335	2878	1719	1915	1865	0.000502189	-0.755051	0.592525
WBGene00018357	moc-3	F42G8.6	F42G8.6	1019	1882	1649	848	1078	1006	0.00441734	-0.754962	0.592562
WBGene00006732	uev-3	F26H9.7	F26H9.7	1602.46	2399.5	2265.63	1347.81	1404.02	1387.83	0.00012781	-0.754779	0.592637
WBGene00022460	use-1	Y110A7A.11	Y110A7A.11	1196	1857	1671	994	1027	1086	0.000470341	-0.754066	0.59293
WBGene00004324	rde-2	F21C3.4	F21C3.4a	3238	4371	4957	2653	2930	2748	2.4e-06	-0.754007	0.592955
WBGene00013878	atfs-1	ZC376.7	ZC376.7a.2	6041	5949	7283	4296	4444	4270	5.82e-30	-0.753848	0.59302
WBGene00014166		ZK945.4	ZK945.4	333.5	458.54	528.39	260.73	315.76	289.03	0.000185971	-0.753829	0.593028
WBGene00007278	lab-1	C03D6.6	C03D6.6	1362	2297	1633	1067	1252	1135	0.00432762	-0.753376	0.593214
WBGene00017886		F28B3.5	F28B3.5b	3369	5194	5457	2848	3235	3127	0.000180805	-0.753006	0.593366
WBGene00007400		C07A9.2	C07A9.2.1	3771	5180	4208	2891	3082	2791	0.000216821	-0.75298	0.593376
WBGene00017462		F14D2.14	F14D2.14	106	193	138	84	91	99	0.0225812	-0.752903	0.593408
WBGene00012927		Y47D3A.14	Y47D3A.14	1039	1254	1280	785	802	808	1.64e-07	-0.752703	0.59349
WBGene00044638		F23A7.8	F23A7.8	22732.4	48853.7	18853.9	15379.2	24673.4	15095.3	0.0574673	-0.752311	0.593652
WBGene00016375		C33H5.8	C33H5.8	2133	2940	2864	1715	1839	1736	1.22e-05	-0.752183	0.593705
WBGene00022970		CD4.10	CD4.10	272	395	334	233	230	192	0.00215721	-0.751798	0.593863
WBGene00010409		H21P03.2	H21P03.2.2	5751	7534	7891	4532	4757	4861	5.97e-07	-0.751582	0.593952
WBGene00016586		C42C1.8	C42C1.8	6144.91	8606.54	8258.28	4876.13	5616.92	4837.45	2.97e-05	-0.751513	0.59398
WBGene00022850		ZK1127.3	ZK1127.3	3482	5645	4222	2678	3304	2792	0.00259506	-0.751248	0.594089
WBGene00011981		T24C2.2	T24C2.2	155	228	227	125	139	133	0.00174386	-0.75115	0.59413
WBGene00008823		F14H3.4	F14H3.4	1552	2087	1973	1166	1240	1333	3.39e-05	-0.751072	0.594162
WBGene00012436	flh-3	Y11D7A.13	Y11D7A.13	1708	2204	2352	1244	1484	1451	3.6e-06	-0.750141	0.594546
WBGene00009007	otub-3	F21D5.2	F21D5.2c.2	6872	8690	8750	4987	5662	5658	7.97e-07	-0.750105	0.59456
WBGene00015308	ddi-1	C01G5.6	C01G5.6	5958	7346	7512	4524	4869	4616	3.04e-08	-0.749879	0.594653
WBGene00044648		R144.13	R144.13	866	1126	1039	724	675	623	6.18e-05	-0.74934	0.594876
WBGene00023427		F14D2.15	F14D2.15	753.17	1101.04	1066.08	578.52	644.38	705.34	0.000349359	-0.748937	0.595042
WBGene00017867	slc-28.1	F27E11.1	F27E11.1	75	70	65	46	41	46	0.0176033	-0.748609	0.595177
WBGene00014975		Y116A8A.10	Pseudogene:Y116A8A.10	291.03	427.93	368.3	217.26	251.01	247.92	0.00155736	-0.746955	0.59586
WBGene00219803		C06A1.12	C06A1.12	1999	1473	1958	1150	1250	1235	4.41e-06	-0.746839	0.595908
WBGene00044609	tbcc-1	Y71H2AM.24	Y71H2AM.24	1444	1522	1697	999	1073	1083	9.23e-12	-0.746498	0.596049
WBGene00017219		F07F6.7	F07F6.7	91	172	140	105	74	69	0.0349252	-0.746245	0.596153
WBGene00000819	csp-1	Y48E1B.13	Y48E1B.13a	41	71	77	31	39	44	0.0413165	-0.745904	0.596294
WBGene00016992	zhit-1	CD4.7	CD4.7b	1362.64	2048.23	1949.49	1096.81	1258.74	1204.21	0.000232097	-0.745361	0.596518
WBGene00045218		K08C9.8	Pseudogene:K08C9.8	60	63	95	42	45	50	0.0126922	-0.745219	0.596577
WBGene00020716	phf-30	T23B12.1	T23B12.1	2062.03	3595.11	2799.53	1689.29	1952.98	1909.6	0.00340698	-0.745197	0.596587
WBGene00022237		Y73B6BL.14	Y73B6BL.14	173	205	195	113	140	126	0.000892869	-0.744964	0.596683
WBGene00020466	sld-2	T12F5.1	T12F5.1	2135	4134	2933	1845	2251	1878	0.00943289	-0.744872	0.596721
WBGene00021687		Y48G8AL.7	Y48G8AL.7	500	724	682	364	448	449	0.000648214	-0.744425	0.596906
WBGene00001110	duo-1	F38B7.5	F38B7.5	2536	2452	3144	1843	1830	1834	3.95e-21	-0.74427	0.59697
WBGene00014221		ZK1098.4	ZK1098.4	2325	2854	2846	1796	1889	1737	2.32e-07	-0.743737	0.59719
WBGene00001867	him-8	T07G12.12	T07G12.12a	2106	2807	2914	1656	1825	1771	3.11e-06	-0.743633	0.597233
WBGene00010089	hpo-31	F55B12.4	F55B12.4.2	1938	2386	2640	1514	1617	1562	1.44e-08	-0.743481	0.597297
WBGene00004383	rnh-2	T13H5.7	T13H5.7	2303	3430	2890	1747	1905-09-13	1917	0.000541052	-0.743473	0.5973
WBGene00011040		R05H5.5	R05H5.5	1457	2039	1971	1111	1281	1263	6.52e-05	-0.74304	0.597479
WBGene00021055		W06A11.4	W06A11.4	597.69	764.86	719.7	458.33	489.72	450.25	3.02e-05	-0.743005	0.597493
WBGene00011350	perm-1	T01H3.4	T01H3.4	9428	8599	11020	6502	6472	6724	3.63e-18	-0.742791	0.597582
WBGene00022629		ZC513.5	ZC513.5	3949	5297	5391	3315	3370	3152	2.88e-06	-0.742715	0.597614
WBGene00021515	set-23	Y41D4B.12	Y41D4B.12b	706	974	883	560	582	574	0.000126176	-0.741758	0.59801
WBGene00013323		Y57G11C.33	Y57G11C.33a	1851	2295	2244	1432	1413	1470	1.35e-06	-0.741572	0.598088
WBGene00008238		C50F4.16	C50F4.16	3423	4532	4747	2797	2882	2868	1.24e-06	-0.740977	0.598334
WBGene00018433	ceh-82	F45C12.2	F45C12.2	75	62	62	41	39	46	0.0232253	-0.740277	0.598624
WBGene00017548		F18A1.7	F18A1.7	20560	29110	24830	15621	17753	16707	0.000170247	-0.739741	0.598847
WBGene00006491	acl-3	ZK809.2	ZK809.2.1	2192	3703	3136	1917	2179	1879	0.00185606	-0.739654	0.598883
WBGene00017828		F26F4.6	F26F4.6	2020	2767	2669	1605	1776	1636	2.06e-05	-0.739623	0.598896
WBGene00044483		H06H21.11	H06H21.11	1900	3097	2614	1646	1694	1712	0.00120398	-0.739299	0.59903
WBGene00235325		C08D8.7	C08D8.7	29	72	50	21	30	34	0.0922377	-0.738989	0.599159
WBGene00016978		C56G2.3	C56G2.3	414	683	694	348	391	431	0.0027372	-0.738874	0.599207
WBGene00016021		C23H3.5	C23H3.5	1891	3315	2885	1606	1878	1844	0.00269757	-0.738461	0.599378
WBGene00006726	ubl-5	F46F11.4	F46F11.4	816	1873	1238	767	965	772	0.0256375	-0.737661	0.599711
WBGene00010081		F55A11.8	F55A11.8a	1636	2542	2326	1248	1580	1495	0.000914836	-0.737575	0.599746
WBGene00008147		C47E12.2	C47E12.2.2	2477	4628	4162	2197	2478	2679	0.00479239	-0.737481	0.599786
WBGene00010420	mcrs-1	H28O16.2	H28O16.2	4019	3736	4576	2850	2848	2713	1.19e-17	-0.737342	0.599843
WBGene00010967	nduo-5	MTCE.35	MTCE.35	6289	22448	10083	7167	9806	6133	0.0782376	-0.737153	0.599922
WBGene00019724		M02B7.2	M02B7.2a	1047	1322	1343.99	821	861.98	829	1.27e-06	-0.737137	0.599929
WBGene00018806		F54D10.5	F54D10.5	3162	3451	3651	2295	2417	2294	3.9e-11	-0.736698	0.600111
WBGene00021014		W03G9.2	W03G9.2	2738	2834	3286	2081	2102	1857	4.22e-13	-0.735764	0.6005
WBGene00184990		C14B1.12	C14B1.12	1041	1423	1195	782	836	844	0.000329302	-0.735663	0.600542
WBGene00013768	sld-5	Y113G7B.24	Y113G7B.24a	1880	2031	2284.43	1285	1505	1431	2.02e-10	-0.734921	0.600851
WBGene00018632	tag-296	F49D11.9	F49D11.9	3249	4528	4268	2571	2938	2624	5.02e-05	-0.733839	0.601302
WBGene00001021	dnj-3	C01G10.12	C01G10.12	530	1018	680	498	502	450	0.0151318	-0.733644	0.601383
WBGene00011641		T09A5.15	T09A5.15	850	1281	972	701	759	609	0.00300089	-0.733459	0.60146
WBGene00020404		T10B11.8	T10B11.8a	2631.51	2990.56	3308.35	2118.37	2053.39	1916.12	3.31e-10	-0.732758	0.601753
WBGene00021845	rpb-7	Y54E10BR.6	Y54E10BR.6	3508	4610	3891	2663	2932	2544	0.000148527	-0.732661	0.601793
WBGene00010637		K07F5.12	K07F5.12	714	953	882	561	587	575	7.09e-05	-0.731854	0.60213
WBGene00017742	nfyc-1	F23F1.1	F23F1.1	3761	4995	4697	3035	3190	2910	1.36e-05	-0.731321	0.602352
WBGene00000537	clk-2	C07H6.6	C07H6.6	3325.51	3238.37	4425.78	2441.03	2571.43	2471.74	1.16e-17	-0.731019	0.602478
WBGene00018808		F54D10.7	F54D10.7	722	820	968	532	583	590	1.59e-08	-0.730478	0.602704
WBGene00020819		T26A5.2	T26A5.2a	4125	4504	5260	3224	3225	3055	1.67e-15	-0.7302	0.60282
WBGene00015513	snpc-1.1	C06A8.2	C06A8.2	4086	5565	5528	3315	3628	3350	1.02e-05	-0.72993	0.602933
WBGene00007334		C05C10.7	C05C10.7	672	1266	853	568	693	566	0.0146818	-0.729896	0.602947
WBGene00011663		T09F3.4	T09F3.4	596	992	754	512	509	533	0.0048116	-0.729592	0.603074
WBGene00015233		B0511.7	B0511.7	2974	4230	4051	2431	2726	2453	6.62e-05	-0.72958	0.60308
WBGene00015640		C09E7.6	Pseudogene:C09E7.6	1183.38	1192.03	1643.76	857.9	939.57	930.1	1.08e-10	-0.729466	0.603127
WBGene00015905		C17E7.12	C17E7.12	713	1217	921	549	646	689	0.0069663	-0.729152	0.603258
WBGene00003787	npp-1	K07F5.13	K07F5.13b	7268	7907	8874	5128	5768	5596	8.69e-13	-0.728597	0.603491
WBGene00010048		F54D5.2	F54D5.2	2709.89	2763.2	3333.77	2001.52	2086.61	1956.22	7.47e-21	-0.728426	0.603562
WBGene00000142	aos-1	C08B6.9	C08B6.9	5611	9201	7674	4739	5390	4939	0.00150085	-0.728147	0.603679
WBGene00008440		DY3.8	DY3.8	5195	6387	6206	3697	4286	4164	2.62e-06	-0.727726	0.603855
WBGene00002214	klc-1	M7.2	M7.2b	9836	13587	12512	7770	8841	7801	5.57e-05	-0.727583	0.603915
WBGene00008236		C50F4.12	C50F4.12	1880	2245	2813	1557	1528	1612	6.73e-08	-0.727394	0.603994
WBGene00009994		F53F4.12	F53F4.12	1974	1989	2350	1471	1498	1366	3.07e-15	-0.726889	0.604205
WBGene00007780		C27D8.4	C27D8.4	2267	3180	3270	1798	2081	2013	4.7e-05	-0.726807	0.60424
WBGene00011115		R07E5.7	R07E5.7	4989	8460	6908	4303	5111	4184	0.00293407	-0.726714	0.604279
WBGene00011576	rmh-2	T07C12.12	T07C12.12	1640.06	1845.4	2563.47	1325.02	1406.63	1352.42	8e-08	-0.72663	0.604314
WBGene00006619	try-1	ZK546.15	ZK546.15	3210	3343	3888	2429	2428	2320	2.89e-17	-0.726378	0.604419
WBGene00017294		F09E10.1	F09E10.1	349	288	409	180	228	283	0.00219145	-0.725875	0.60463
WBGene00011309		R186.8	R186.8.1	1077	2035	1294	980	1028	891	0.0158769	-0.724904	0.605038
WBGene00022820		ZK813.1	ZK813.1.2	13882	14116	15242	9029	10415	10307	1.24e-09	-0.72482	0.605073
WBGene00015451		C04F5.9	C04F5.9	1972	1995	2465	1365	1547	1503	1.72e-14	-0.724177	0.605342
WBGene00012982	jmjd-2	Y48B6A.11	Y48B6A.11	2317	1441	2496	1351	1342	1469	0.000627913	-0.723767	0.605514
WBGene00004042	plk-1	C14B9.4	C14B9.4a	14854	11027	16940	9506	10213	9336	8.8e-07	-0.723288	0.605715
WBGene00220211		Y76B12C.11	Y76B12C.11	504	326	402	326	259	228	0.00836595	-0.72305	0.605815
WBGene00016064	acd-1	C24G7.2	C24G7.2	75.92	79	60	43.81	58	34	0.0489021	-0.723003	0.605835
WBGene00016182		C28C12.12	C28C12.12	4714	6285	5918	3709	4009	3838	1.59e-05	-0.722996	0.605838
WBGene00012678		Y39B6A.16	Y39B6A.16	884	1098	977	600	700	715	0.000184057	-0.722938	0.605862
WBGene00023065		F53F10.6	F53F10.6	268.45	271.64	237.94	190.8	181.71	151.29	0.00276483	-0.722806	0.605918
WBGene00018455	fbxc-42	F45D11.9	F45D11.9	174	210.77	231.85	136	122	153	0.000941867	-0.722743	0.605944
WBGene00006374	syx-4	T01B11.3	T01B11.3	792	995	944	604	684	576	4.26e-05	-0.722488	0.606051
WBGene00007147		B0334.9	Pseudogene:B0334.9	39	34	44	21	32	18	0.064459	-0.72245	0.606067
WBGene00004800	sir-2.1	R11A8.4	R11A8.4b.2	3278	4122	4719.22	2570.93	2792.85	2890	4.69e-07	-0.722443	0.60607
WBGene00011941		T23B5.4	T23B5.4a	386	620	491	343	340	317	0.00450351	-0.721936	0.606283
WBGene00077500		C27H6.9	C27H6.9	1658	2980	2371	1372	1680	1610	0.00609968	-0.7219	0.606299
WBGene00006387	taf-6.1	W09B6.2	W09B6.2	2347	1874	2527	1499	1567	1554	1.99e-08	-0.721494	0.606469
WBGene00007534		C12D8.1	C12D8.1d	4120.66	3331.38	4043.04	2328.05	2487.35	3003.34	4.93e-05	-0.721486	0.606472
WBGene00003499	mut-2	K04F10.6	K04F10.6a	3728.86	4805.13	5302.42	2926.45	3257.98	3251.39	1.2e-06	-0.721272	0.606562
WBGene00017683	rbbp-5	F21H12.1	F21H12.1	2698	3730	3690	2116	2339	2425	5.11e-05	-0.721124	0.606625
WBGene00021596	spsb-2	Y46E12BL.3	Y46E12BL.3	5906.55	5321.45	6316.3	3707.21	4193.28	4187.65	3.61e-10	-0.720926	0.606708
WBGene00002034	htp-3	F57C9.5	F57C9.5	4114	3707	4928	2824	2997	2951	5.47e-17	-0.72055	0.606866
WBGene00016622	mafr-1	C43H8.2	C43H8.2	2633	3102	3125	1944	2035	2114	2.27e-07	-0.720037	0.607082
WBGene00016352	tbck-1	C33F10.2	C33F10.2	1147	1276	1650	930	884	961	2.19e-08	-0.719812	0.607177
WBGene00009335		F32D8.13	F32D8.13a	77.53	128.78	126.9	76.65	49.42	82.38	0.0409088	-0.719763	0.607197
WBGene00018867		F55A12.10	F55A12.10	682	874	714	445	538	557	0.0014206	-0.719102	0.607475
WBGene00009364		F33H1.3	F33H1.3	7808	7080	8698	5393	5253	5624	1.11e-12	-0.718417	0.607764
WBGene00021269		Y23H5A.2	Y23H5A.2a	863.35	728.65	943.64	522.22	556.56	649.64	9.59e-06	-0.718265	0.607828
WBGene00017593		F19C7.3	F19C7.3	92.65	171.18	104.82	67.17	87.58	79.85	0.0502297	-0.717499	0.608151
WBGene00007731		C25G4.3	C25G4.3a	484	623	608	374	404	394	5.28e-05	-0.71672	0.608479
WBGene00018664	bath-11	F52C6.7	Pseudogene:F52C6.7	161	243	175	125	134	125	0.0134494	-0.716524	0.608562
WBGene00022134		Y71G10AL.1	Y71G10AL.1b	4620	6658	6125	3933	4265	3676	0.000183749	-0.71647	0.608585
WBGene00019578		K09E3.7	K09E3.7	1150	847	1305	682	771	788	2.83e-05	-0.715482	0.609001
WBGene00007589	erg-28	C14C10.6	C14C10.6	344	783	627	330	391	410	0.0285691	-0.715085	0.609169
WBGene00000777	cpn-1	F43G9.9	F43G9.9.2	11267	12432	12137	7885	8739	8210	1.75e-07	-0.714955	0.609224
WBGene00017934		F30B5.4	F30B5.4b	3132	2927	3243	2119	2120.26	2204.1	2.41e-09	-0.714787	0.609295
WBGene00008534		F02H6.1	Pseudogene:F02H6.1	126	165	189	100	110	111	0.0018403	-0.714707	0.609329
WBGene00007015	mdt-11	R144.9	R144.9	612	1143	914	477	660	626	0.0138626	-0.714478	0.609426
WBGene00016291		C31H1.8	C31H1.8a	7054	6741	8675	4977	5435	5151	1.23e-23	-0.71421	0.609539
WBGene00009145		F26A3.7	F26A3.7	2100	2761	2632	1643	1817	1696	1.97e-05	-0.712768	0.610149
WBGene00000835	cuc-1	ZK652.11	ZK652.11	1947	3347	2604	1777	1812	1740	0.00438142	-0.711675	0.610611
WBGene00003236	mif-3	F13G3.9	F13G3.9	1393	2026	1856	1092	1256	1252	0.000427598	-0.711455	0.610704
WBGene00009588		F40F11.3	F40F11.3b	1356	2626	1758	1124	1408	1282	0.0174681	-0.711318	0.610762
WBGene00001749	gst-1	R107.7	R107.7.2	9730	10715	10928	6923	7722	7172	8.68e-09	-0.710594	0.611068
WBGene00019824		R02D3.7	R02D3.7	4318	5054	5644	3295	3667	3439	6.53e-10	-0.709993	0.611323
WBGene00011242		R11D1.1	R11D1.1d	1855	1977	2527	1284	1549	1543	3.61e-08	-0.709406	0.611572
WBGene00015180		B0416.4	B0416.4	400	738	541	305	428	379	0.0192242	-0.709076	0.611712
WBGene00009862	fbxb-67	F49B2.2	F49B2.2	89	132	123	72	82	74	0.0115258	-0.709062	0.611718
WBGene00018118		F36H12.2	F36H12.2b	347.28	391.21	432.79	273.59	273.31	260.37	2.94e-06	-0.708675	0.611882
WBGene00009427	fbxa-181	F35E12.3	F35E12.3	41	78	56	34	39	36	0.0678112	-0.708358	0.612016
WBGene00021841		Y54E10BR.2	Y54E10BR.2.2	2028	2726	2743	1594	1860	1708	2.86e-05	-0.70749	0.612385
WBGene00015508	mvb-12	C06A6.3	C06A6.3	2592.37	3011.55	3368.55	1973.3	2185.42	2067.69	7.85e-10	-0.707395	0.612425
WBGene00010281		F58G11.3	F58G11.3a	6329.72	6354.83	7847.48	4837	4989	4465	1.36e-18	-0.706972	0.612604
WBGene00009673		F43G9.13	F43G9.13	916.8	1754.58	1573.27	872.25	1040.83	917.72	0.00887124	-0.706796	0.612679
WBGene00009131		F25H8.1	F25H8.1a	2156	3044	3122	1847	1876	1982	7.57e-05	-0.7063	0.61289
WBGene00016823		C50E3.12	C50E3.12	1342	1349	1612	956	929	1092	5.31e-08	-0.705933	0.613046
WBGene00009563		F39H2.3	F39H2.3.2	2442	4074	3516	2163	2447	2212	0.0024079	-0.704933	0.613471
WBGene00002996	lin-7	Y54G11A.10	Y54G11A.10a	1144	1644	1537	901	1062	1005	0.000379709	-0.704765	0.613542
WBGene00008283		C53D6.6	C53D6.6.1	381	768	673	331	468	399	0.0211175	-0.704751	0.613549
WBGene00007616	rpoa-12	C15H11.8	C15H11.8.2	741	1276	956	614	721	674	0.00829848	-0.703922	0.613901
WBGene00016364	nhr-161	C33G8.7	C33G8.7	202	317	274	156	185	192	0.00779064	-0.703817	0.613946
WBGene00008080		C44B9.3	C44B9.3	3375	3311	3476	2215	2511	2374	5.33e-08	-0.703774	0.613964
WBGene00018278		F41C6.4	F41C6.4b	52	53	47	33	36	29	0.0442472	-0.703499	0.614081
WBGene00015176	vps-51	B0414.8	B0414.8a	2846	3991	4219	2419	2684	2501	4.42e-05	-0.703276	0.614176
WBGene00017015		D1014.2	D1014.2	132	141	153	101	95	94	0.00119473	-0.703032	0.61428
WBGene00010616		K07A1.10	K07A1.10	1545	2864	2359	1343	1612	1596	0.00854582	-0.702851	0.614357
WBGene00004352	rgs-9	ZC53.7	ZC53.7	1240	1372	1390	833	956	993	4.31e-06	-0.702668	0.614435
WBGene00001358	evl-20	F22B5.1	F22B5.1	733	1013	1044	620	661	639	8.32e-05	-0.701893	0.614765
WBGene00019799		M151.7	M151.7	2281.51	1672.4	2189.46	1362.09	1393.91	1487.06	3.69e-05	-0.701855	0.614781
WBGene00016939		C55B6.1	C55B6.1a	766	990	994	587	646	667	4.23e-05	-0.701838	0.614789
WBGene00017005		D1007.8	D1007.8	938	1562	1333	790	948	867	0.00378168	-0.701822	0.614795
WBGene00006804	unc-71	Y37D8A.13	Y37D8A.13	4993	4831	6506	3615	3965	3790	2.18e-17	-0.701329	0.615005
WBGene00003136	mau-2	C09H6.3	C09H6.3	3902	4706	4992	3045	3393	3038	7.77e-08	-0.701106	0.615101
WBGene00021853		Y54F10AM.11	Y54F10AM.11	1159	1371	1316	880	933	867	5.67e-06	-0.7008	0.615231
WBGene00011642		T09B9.1	T09B9.1	1643	1559	1973	1105	1275	1229	8.07e-12	-0.700593	0.615319
WBGene00018698	vha-18	F52E1.10	F52E1.10	2830	4005	4177	2354	2654	2578	8.18e-05	-0.699778	0.615667
WBGene00021812		Y53G8AR.5	Y53G8AR.5	949	1618	1405	846	952	903	0.00392067	-0.698973	0.616011
WBGene00010140		F56A8.4	F56A8.4	1348	2619	2104	1253	1572	1251	0.0134022	-0.698572	0.616182
WBGene00010426		H37A05.2	H37A05.2	27	43	63	20	27	32	0.0925588	-0.698097	0.616385
WBGene00020475	sut-1	T13B5.8	T13B5.8b	1990	1705	1857	1298	1328	1255	4.48e-06	-0.697982	0.616434
WBGene00000406	cdk-4	F18H3.5	F18H3.5b	524	954	799	475	588	470	0.0109599	-0.697981	0.616434
WBGene00014177	frg-1	ZK1010.3	ZK1010.3.2	2992	3991	3615	2374	2587	2410	8.32e-05	-0.697708	0.616551
WBGene00011451		T04H1.5	T04H1.5	1284	1934	1726	1016	1199	1183	0.00120072	-0.697659	0.616572
WBGene00018337		F42A9.8	F42A9.8a	1048	1279	1191	766	789	888	0.000106026	-0.697527	0.616628
WBGene00219959		F52D2.14	F52D2.14	49	52	49	30	39	28	0.0471532	-0.697106	0.616808
WBGene00006448	glod-4	C16C10.10	C16C10.10	1310	1969	1711	1029	1231	1174	0.00138244	-0.696958	0.616872
WBGene00019683		K12H6.2	K12H6.2	335	435	409	241	279	292	0.000792821	-0.696742	0.616964
WBGene00007435		C08B11.8	C08B11.8	2771	3687	3771	2195	2410	2493	2.48e-05	-0.696174	0.617207
WBGene00003246	mig-14	R06B9.6	R06B9.6	2860	2457	3227	1907	1983	2078	4.31e-10	-0.696161	0.617212
WBGene00015150		B0336.13	B0336.13	3216.08	4050.57	4013.05	2413.86	2764.6	2690.57	7.4e-06	-0.696105	0.617237
WBGene00003064	lpd-8	R10H10.1	R10H10.1	2139	3021	2989	1673	1863	2079	0.000391777	-0.695558	0.61747
WBGene00021155		Y4C6B.1	Y4C6B.1	4128.63	3446	4580.59	2840.3	2933.69	2727	3.09e-10	-0.69548	0.617504
WBGene00019143		H01M10.1	H01M10.1	368	528	534	254	324	388	0.00627524	-0.694923	0.617742
WBGene00022067		Y67D8C.3	Y67D8C.3c	1850.87	1949.7	2526.06	1497.45	1476.92	1442.6	8.14e-13	-0.694706	0.617835
WBGene00016678		C45G9.7	C45G9.7	267	627	366	228	306	283	0.0588246	-0.694597	0.617882
WBGene00003421	msh-5	F09E8.3	F09E8.3a	2752	2742	3762	2208	2283	1953	6.37e-10	-0.693949	0.61816
WBGene00012432		Y11D7A.8	Y11D7A.8	25	34	40	11	23	24	0.113566	-0.69384	0.618206
WBGene00016824		C50E3.13	C50E3.13	1110	978	1260	713	788	836	9.57e-08	-0.693613	0.618304
WBGene00012992	mrpl-20	Y48C3A.10	Y48C3A.10	1496	1975	1605	1125	1247	1161	0.000752741	-0.693322	0.618428
WBGene00007196		B0513.4	B0513.4a	7161	7901	9360	5120	5904	6053	4.21e-09	-0.693219	0.618472
WBGene00013405	tdpt-1	Y63D3A.4	Y63D3A.4	1747	1739	2153	1345	1427	1177	7.66e-10	-0.693044	0.618547
WBGene00006376	syp-2	C24G6.1	C24G6.1	2636	3652	3392	2102	2394	2238	0.000158837	-0.692973	0.618578
WBGene00044170		Y51B9A.10	Pseudogene:Y51B9A.10	37.39	39.84	39.63	28.88	24.65	21.87	0.0657038	-0.692296	0.618868
WBGene00018399		F43H9.3	F43H9.3	1039.97	1288.34	1570.12	843	968.43	892.29	3.94e-06	-0.691992	0.618999
WBGene00020422		T10F2.2	T10F2.2	2926	4954	4063	2624	2995	2578	0.00433842	-0.691397	0.619254
WBGene00022772		ZK616.2	ZK616.2	205	206	239	142	142	165	0.00029032	-0.691287	0.619301
WBGene00009256	tut-2	F29F11.3	F29F11.3	1274	2286	2008	1152	1358	1279	0.0064592	-0.691207	0.619335
WBGene00015099	ggtb-1	B0280.1	B0280.1a	2018.3	3144.86	2847.03	1732.54	1998.33	1799.17	0.00124058	-0.691167	0.619353
WBGene00010249		F58D12.1	F58D12.1	40.68	46.53	50.34	36.94	22.59	28.08	0.065273	-0.69116	0.619356
WBGene00005021	sqv-3	R10E11.4	R10E11.4	3358.05	3837.28	4173.4	2647.78	2690.79	2658.38	4.31e-10	-0.691029	0.619412
WBGene00206354		F27E5.9	F27E5.9	124	147	108	50	79	113	0.0737233	-0.690559	0.619614
WBGene00010814		M01F1.8	M01F1.8a	2784	2639	3102	2010	1982	2017	8.31e-13	-0.690443	0.619664
WBGene00185098		Y71G12B.35	Y71G12B.35	221	281	285	168	199	177	0.000638564	-0.690393	0.619685
WBGene00013719		Y106G6H.6	Y106G6H.6d.1	2975	4556	4564	2605	3025	2717	0.000626427	-0.690131	0.619798
WBGene00014228	mett-10	ZK1128.2	ZK1128.2b	1268	1839	2075	1087	1227	1249	0.000395401	-0.690051	0.619832
WBGene00022124	supr-1	Y71F9AR.3	Y71F9AR.3	2187	2176	2831	1621	1746	1687	8.89e-17	-0.690005	0.619852
WBGene00002324	let-49	Y54E5B.3	Y54E5B.3b	1743	1994	2288	1332	1394	1494	2.31e-08	-0.68999	0.619858
WBGene00009565		F39H11.1	F39H11.1	4529.84	6248.64	5512.42	3667.69	3881.8	3824.25	0.000221274	-0.689786	0.619946
WBGene00011633		T09A5.4	T09A5.4	144	237	200	113	138	140	0.0170772	-0.689425	0.620101
WBGene00016674		C45G9.2	C45G9.2	2155	3013	2780	1786	1950	1807	0.000187567	-0.689178	0.620207
WBGene00021538	rabs-5	Y42H9AR.3	Y42H9AR.3a	1069.44	1676.14	1744.53	975.37	1075.78	1034.7	0.00111302	-0.688708	0.620409
WBGene00013319	ccch-5	Y57G11C.25	Y57G11C.25	353	512	458	302	291	319	0.00214754	-0.688532	0.620485
WBGene00008042		C40H1.7	C40H1.7	465	618	939	353	361	597	0.026445	-0.68819	0.620632
WBGene00017827		F26F4.5	F26F4.5.2	2937	2790	3581	2104	2298	2163	2.98e-18	-0.687532	0.620915
WBGene00010051		F54D5.5	F54D5.5b	2887	3226	3570	2127	2398	2302	7.71e-10	-0.687439	0.620955
WBGene00016816		C50E3.5	C50E3.5	5024	5354	6232	3744	4001	3982	4.63e-15	-0.687438	0.620955
WBGene00020822		T26A5.6	T26A5.6	1714	3555	2993	1700	2056	1805	0.0173168	-0.687299	0.621015
WBGene00022400	rpb-9	Y97E10AR.5	Y97E10AR.5	1869	2943	2518	1566	1831	1676	0.00219882	-0.686986	0.62115
WBGene00016568		C41G11.1	C41G11.1a	1060	1800	1835	885	1127	1174	0.00663249	-0.686508	0.621356
WBGene00015463	hpo-9	C05C8.6	C05C8.6	5396	6235	6853	4213	4754	4059	1.85e-08	-0.686285	0.621452
WBGene00019606	clec-88	K10B2.3	K10B2.3a	20458	24706	27047	15082	17487	18072	1.44e-06	-0.686243	0.62147
WBGene00014205		ZK1058.5	ZK1058.5	1120.48	1835.46	1532.74	933.48	1046.18	1108.34	0.00469416	-0.686207	0.621486
WBGene00015487	mrps-17	C05D11.10	C05D11.10	2023	3522	2499	1756	1926	1840	0.0103708	-0.686179	0.621498
WBGene00012385		Y5F2A.4	Y5F2A.4	3331	4224	4320	2606	2883	2850	4e-06	-0.685933	0.621604
WBGene00012931		Y47D3A.20	Y47D3A.20	943	1264	1032	738	772	753	0.00108701	-0.685267	0.621891
WBGene00010666		K08E4.2	K08E4.2b	533.57	823.72	711.56	438.11	521.21	469.3	0.00324033	-0.685242	0.621902
WBGene00020087		R119.1	Pseudogene:R119.1	1093	1167	1431	824	887	887	5.6e-11	-0.685133	0.621949
WBGene00017924	mrps-21	F29B9.10	F29B9.10	1256	1828	1410	1019	1117	991	0.00296057	-0.684934	0.622034
WBGene00016045	spas-1	C24B5.2	C24B5.2c	5214	5338	6653	3948	4272	3942	1.94e-20	-0.684838	0.622076
WBGene00045043	Y116A8C.48	Y116A8C.48	Pseudogene:Y116A8C.48	1.61	14.93	9.3	1.14	1.83	2.8	NA	-0.684602	0.622177
WBGene00019993	rbx-2	R10A10.2	R10A10.2	1496	1875	1748	1145	1229	1226	4.27e-05	-0.684591	0.622182
WBGene00010678		K08F4.3	K08F4.3	6068	7705	7498	4854	5270	4862	6.98e-06	-0.684152	0.622372
WBGene00015028		B0207.5	B0207.5b	35	62	65	34	29	39	0.0739137	-0.684131	0.622381
WBGene00050919		C45G9.15	C45G9.15	57.51	70.78	60.87	28.22	56.59	36.46	0.0748445	-0.683498	0.622654
WBGene00007622		C16C10.1	C16C10.1	1846	2455	2764	1552	1801	1579	2.98e-05	-0.683044	0.62285
WBGene00012769		Y41E3.11	Y41E3.11e	5699.86	1048.24	4031	691.14	2068.07	1959.47	0.175507	-0.682992	0.622872
WBGene00017453		F14D2.5	F14D2.5	53	55	27	31	27	24	0.125794	-0.682796	0.622957
WBGene00020600	trd-1	T20B12.1	T20B12.1	2508	3355	3698	2125	2262	2297	1.88e-05	-0.682249	0.623193
WBGene00018328		F42A6.6	F42A6.6b	630	831	765	496	520.74	543.9	0.000330226	-0.681642	0.623455
WBGene00010973	rip-1	R01H10.5	R01H10.5	34.21	52	54.22	23	33	33	0.0729814	-0.681496	0.623518
WBGene00017360		F10E9.11	F10E9.11	2022	2826	2451	1590	1786	1740	0.000587121	-0.681324	0.623593
WBGene00010787		K12D12.5	K12D12.5	2884	2253	3343	1930	2008	2006	4.57e-07	-0.681058	0.623708
WBGene00003859	oig-1	C09E7.3	C09E7.3	32	81	67	20	46	39	0.135167	-0.680841	0.623802
WBGene00013442		Y66D12A.16	Y66D12A.16b	2098	1960	2156	1485	1546	1379	8.15e-08	-0.680434	0.623977
WBGene00004354	rgs-11	F45B8.1	F45B8.1	661	978	1101	570	699	622	0.00119004	-0.680255	0.624055
WBGene00020447		T12B3.4	T12B3.4a	2593.89	2428.13	3318.36	1981.44	1998.68	1910	1.08e-14	-0.679959	0.624183
WBGene00008107	aspm-1	C45G3.1	C45G3.1	4987	5046	6194	3918	3978	3616	3.72e-17	-0.679818	0.624244
WBGene00016485	meg-4	C36C9.1	C36C9.1	2916.47	2290.51	3394.01	1839.71	2014.61	2163.2	5.45e-06	-0.679798	0.624253
WBGene00016145		C26E6.12	C26E6.12	1958	3618	3231	1851	2147	2034	0.00825683	-0.679498	0.624382
WBGene00013334		Y57G11C.45	Y57G11C.45b	271	359	363	195	182	294	0.01578	-0.679442	0.624407
WBGene00219369		R160.10	R160.10	11	15	6	3	2	7	NA	-0.679047	0.624578
WBGene00003160	mdf-1	C50F4.11	C50F4.11	3926	5251	5265	3214	3703	3247	4.23e-05	-0.679001	0.624598
WBGene00022669		ZK177.1	ZK177.1	1688	1917	2090	1284	1457	1295	2.73e-08	-0.6789	0.624641
WBGene00004510	rrf-3	F10B5.7	F10B5.7	3330	3465	4832	2604	2799	2762	8.69e-10	-0.678852	0.624662
WBGene00011300		R107.5	R107.5b	5716	6878	6872	4393	4832	4575	9.11e-07	-0.678738	0.624711
WBGene00016971	toe-2	C56E6.3	C56E6.3b	5449	5684	6836.54	4150.68	4405.15	4216	5.19e-20	-0.678641	0.624753
WBGene00016148		C26F1.3	C26F1.3.1	2584	3924	3232	2110	2398	2298	0.00213146	-0.678448	0.624837
WBGene00007065	pot-3	3R5.1	3R5.1b	431	609	580	348	382	399	0.00106548	-0.67841	0.624854
WBGene00018901		F55G1.5	F55G1.5	1064	1345	1180	848	893	790	0.000305366	-0.678205	0.624942
WBGene00012157	adbp-1	VW02B12L.4	VW02B12L.4	2428	3369	3106	1982	2102	2171	0.00026084	-0.678131	0.624975
WBGene00007022	mdt-22	ZK970.3	ZK970.3	1909	2981	2574	1531	1865	1798	0.00281765	-0.678126	0.624977
WBGene00011578	npr-20	T07D4.1	T07D4.1	54	64	83	42	46	46	0.0241428	-0.677737	0.625145
WBGene00011303		R166.3	R166.3	741	1500	1129	720	807	764	0.0217693	-0.677539	0.625231
WBGene00010498		K02B12.5	K02B12.5	3580.79	3962.11	4936.47	2775.42	3128.29	2919.57	6.31e-11	-0.677437	0.625275
WBGene00018137	bath-41	F37A4.9	F37A4.9	7454	8758	9509	5354	6506	6328	1.27e-06	-0.677311	0.62533
WBGene00008859		F15D4.2	F15D4.2	737	1088	910	602	626	679	0.00272554	-0.677304	0.625333
WBGene00006446	atx-3	F28F8.6	F28F8.6.2	3515	4946	4420	2827	3310	2923	0.000485694	-0.676985	0.625471
WBGene00018995	ccpp-1	F56H1.5	F56H1.5	2830	3000	3851	2237	2439	2178	1.99e-12	-0.676179	0.625821
WBGene00018088	trpp-4	F36D4.2	F36D4.2	953	1703	1459	907	971	957	0.00779372	-0.675987	0.625904
WBGene00004721	san-1	ZC328.4	ZC328.4	2325.79	3815.01	3581.73	1938.95	2439.84	2352.99	0.00382916	-0.675953	0.625919
WBGene00001193	egl-26	C23H3.1	C23H3.1	602	605	841	429	505	502	2.57e-06	-0.675815	0.625978
WBGene00009404		F35C11.5	F35C11.5	6948	7854	9417	5372	6027	5770	1.17e-10	-0.675284	0.626209
WBGene00219218		Y73B6BL.288	Y73B6BL.288	166	247	230	143	155	146	0.00584008	-0.675152	0.626266
WBGene00003209	mel-26	ZK858.4	ZK858.4a	13254	17431	17917	10403	12033	11859	2.53e-05	-0.675102	0.626288
WBGene00000467	cep-1	F52B5.5	F52B5.5a.2	3531	5042	5145	3112	3549	2962	0.000265263	-0.674743	0.626444
WBGene00249815		F20D12.12	F20D12.12	230.89	325.94	220.85	163.71	213	155.78	0.0272368	-0.674648	0.626485
WBGene00016171		C27F2.10	C27F2.10	3250	3844	4515	2634	2807	2776	8.27e-09	-0.674621	0.626497
WBGene00010196		F57C2.4	F57C2.4	1408	2889	1871	1169	1595	1421	0.0352428	-0.674468	0.626563
WBGene00004817	skr-11	F13A7.9	Pseudogene:F13A7.9	129	205	197	128	114	120	0.0128951	-0.674453	0.62657
WBGene00015540	sams-4	C06E7.3	C06E7.3b	177.75	118.79	179.71	106.7	80.86	130.42	0.0293669	-0.674394	0.626595
WBGene00011811		T16H12.1	T16H12.1a	208	317	289	174	226	159	0.0121186	-0.674342	0.626618
WBGene00011189		R10D12.8	R10D12.8	282	546	482	271	333	284	0.021488	-0.674307	0.626633
WBGene00016236	cec-9	C29H12.5	C29H12.5	1445	1451	1909	1147	1203	1054	5.47e-11	-0.674036	0.626751
WBGene00007797		C29A12.1	C29A12.1	3904	5295	4835	3213	3456	3255	0.000149189	-0.673813	0.626848
WBGene00006397	taf-13	C14A4.10	C14A4.10	2091	3608	2808	1927	2059	1922	0.00749579	-0.673651	0.626918
WBGene00015307		C01G5.5	C01G5.5	1122	1623	1587	944	1086	1009	0.000492543	-0.673642	0.626922
WBGene00013553		Y75B8A.18	Y75B8A.18a	1095	2032	1658	1010	1285	990	0.0151199	-0.673606	0.626938
WBGene00013522		Y73F8A.13	Y73F8A.13	231	418	301	210	223	215	0.0249468	-0.673605	0.626938
WBGene00020399	ztf-4	T10B11.3	T10B11.3	4051	4518	4688	3042	3268	3148	1.57e-08	-0.673442	0.627009
WBGene00000270	bre-5	T12G3.8	T12G3.8a	1175.16	1547.29	1695.55	1000.51	1130.52	980.34	3.55e-05	-0.673434	0.627012
WBGene00011739		T12G3.4	T12G3.4	1412.84	2310.79	1822.51	1168.54	1384.48	1308.66	0.00634279	-0.673392	0.627031
WBGene00011988	har-2	T24D1.5	T24D1.5.2	2620	3618	3760	2157	2494	2384	0.000104051	-0.673123	0.627148
WBGene00011272	dtmk-1	R53.2	R53.2	1896	2808	2500	1452	1726	1858	0.0023304	-0.672917	0.627237
WBGene00011740	mrpl-51	T12G3.5	T12G3.5.2	3439	5353	4508	2903	3335	3083	0.00234622	-0.672813	0.627282
WBGene00008488		F01D4.5	F01D4.5b	1763	2948	2523	1529	1724	1774	0.00502571	-0.672764	0.627303
WBGene00010584		K05C4.8	K05C4.8	9	6	7	2	2	4	NA	-0.672697	0.627333
WBGene00008684	mig-32	F11A10.3	F11A10.3b	52.23	265.25	252.34	113.91	139.02	53.58	0.16728	-0.672629	0.627362
WBGene00009733		F45G2.7	F45G2.7	482	615	498	385	387	350	0.00247233	-0.672434	0.627447
WBGene00017237	pole-2	F08B4.5	F08B4.5	4005	5418	5324	3303	3876	3239	0.000126167	-0.67229	0.62751
WBGene00010036	cpar-1	F54C8.2	F54C8.2	4142.08	4644.01	4243.4	2973.64	3191.41	3125.87	2.85e-05	-0.67221	0.627545
WBGene00194884		Y48B6A.17	Y48B6A.17	79.36	55.18	68.65	41.1	51.03	43.99	0.040807	-0.67219	0.627554
WBGene00010305		F59A2.5	F59A2.5	665	1186	861	586	698	587	0.0171021	-0.67173	0.627753
WBGene00014209		ZK1067.3	ZK1067.3	3666	3751	4645	2815	3062	2725	5.66e-16	-0.67159	0.627814
WBGene00004882	smg-4	F46B6.3	F46B6.3b	4047	5085	4985	3122	3522	3388	1.26e-05	-0.67146	0.627871
WBGene00005006	spr-1	D1014.8	D1014.8	2219	3575	3344	2017	2244	2120	0.00208907	-0.671006	0.628069
WBGene00018422		F44E2.9	F44E2.9	590	1369	1017	518	736	730	0.0499519	-0.670869	0.628128
WBGene00012993	dmsr-3	Y48C3A.11	Y48C3A.11	64	93	106	33	55	78	0.0894469	-0.670729	0.628189
WBGene00015938	anat-1	C17H12.13	C17H12.13a	5028	6043	6795	4088	4376	4237	2.03e-08	-0.670725	0.628191
WBGene00016793	arp-11	C49H3.8	C49H3.8	2581.99	3967.98	3747.99	2291.98	2532.98	2399.98	0.00102756	-0.670448	0.628312
WBGene00003804	npp-18	Y43F4B.4	Y43F4B.4	4228	6066	5734	3518	4054	3746	0.000368819	-0.66926	0.628829
WBGene00011528		T06D8.7	T06D8.7	1933	2992	2611	1645	1891	1757	0.00211345	-0.669047	0.628922
WBGene00016566	eri-7	C41D11.7	C41D11.7	2147	3447	3429	1972	2316	2006	0.00221143	-0.669006	0.62894
WBGene00077543		F27D4.8	F27D4.8	571	723	688	452	462	489	0.000200243	-0.668986	0.628949
WBGene00000517	cki-2	T05A6.2	T05A6.2a.1	4574	4080	5031	3432	3354	2979	6.64e-09	-0.668947	0.628965
WBGene00003082	lsm-8	Y73B6BL.32	Y73B6BL.32	3692	4894	4384	2962	3285	2967	0.000207573	-0.668873	0.628998
WBGene00016421	cdc-7	C34G6.5	C34G6.5	3720	5336	5550	3135	3719	3425	0.000290823	-0.668719	0.629065
WBGene00012867	seld-1	Y45F10A.4	Y45F10A.4	636	780	846	493	550	559	1.76e-05	-0.668715	0.629067
WBGene00018605		F48E3.4	F48E3.4	7283	10360	9707	5613	7137	6542	0.000719318	-0.668689	0.629078
WBGene00020761		T24C4.5	T24C4.5	1910.16	2131.53	2346	1450.51	1546.82	1566.02	4.16e-09	-0.668372	0.629216
WBGene00018680	tsen-54	F52C12.3	F52C12.3	1174	1310	1366	868	996	887	7.85e-07	-0.667674	0.629521
WBGene00000093	agt-1	Y62E10A.5	Y62E10A.5a	761	1246	1008	648	780	677	0.00749989	-0.667308	0.629681
WBGene00016380	ntp-1	C33H5.14	C33H5.14a	2124	4002	3546	2053	2355	2267	0.0110027	-0.667261	0.629701
WBGene00001835	hda-2	C08B11.2	C08B11.2	1673	2082	2236	1297	1437	1517	1.26e-05	-0.667114	0.629765
WBGene00017356		F10E9.4	F10E9.4	2314	3666	3096	1909	2282	2178	0.00368652	-0.666983	0.629823
WBGene00013867		ZC373.2	ZC373.2	18630	15890	18314	11475	12636	13603	6.09e-06	-0.666639	0.629973
WBGene00007615	set-31	C15H11.5	C15H11.5.2	2144	2962	2884	1850	2050	1761	0.000200362	-0.666586	0.629996
WBGene00006568	thk-1	Y43C5A.5	Y43C5A.5b	2139.37	2782.91	2555.9	1656.97	1867.46	1797.17	0.000144345	-0.666527	0.630022
WBGene00011202		R10E4.6	R10E4.6	69	126	62	58	49	58	0.106847	-0.666489	0.630038
WBGene00010951		M199.2	M199.2.1	409	503	600	319	393	353	0.000118792	-0.666165	0.63018
WBGene00220168		Y48A6C.10	Y48A6C.10	10	35	11	6	13	2	0.180141	-0.66615	0.630186
WBGene00011499		T05G5.4	T05G5.4	38.06	83.83	96.03	38.18	47.24	51.79	0.0968526	-0.665895	0.630298
WBGene00010439		JC8.7	JC8.7a	1338	1803	1761	1114	1226	1141	0.0001098	-0.665472	0.630482
WBGene00015466	hyls-1	C05C8.9	C05C8.9b.1	1382	1989	1891	1200	1283	1238	0.00045365	-0.665414	0.630508
WBGene00194707		C53A5.17	C53A5.17	1104	1745	1539	919	1102	1058	0.00373344	-0.66446	0.630925
WBGene00018072	nprl-3	F35H10.7	F35H10.7b	2996.74	3299.42	3773.66	2384.32	2432.46	2403.85	4.03e-12	-0.664076	0.631093
WBGene00004340	rfc-4	F31E3.3	F31E3.3	5505	8403	7396	4587	5306	5147	0.00173624	-0.663977	0.631136
WBGene00017289		F09E5.11	F09E5.11	1197	3043	1706	1118	1577	1274	0.0727	-0.663623	0.631291
WBGene00018099	ztf-28	F36F12.8	F36F12.8	2083	1703	1962	1295	1420	1397	1.86e-05	-0.663212	0.631471
WBGene00018239	sec-20	F40G9.1	F40G9.1	1293	1646	1671	1149	1134	999	4.68e-05	-0.663209	0.631472
WBGene00013335		Y57G11C.46	Y57G11C.46	62	98	81	45	67	49	0.059099	-0.662231	0.631901
WBGene00021132	nfyb-1	W10D9.4	W10D9.4	2924	2414	3403	2000	2041	2184	1.23e-07	-0.662188	0.631919
WBGene00007870		C32H11.7	C32H11.7a	148.29	199.74	133.27	112.5	118.43	101.98	0.0340015	-0.661626	0.632165
WBGene00003975	pen-2	T28D6.9	T28D6.9	1426	2366	1891	1263	1473	1255	0.0075386	-0.661275	0.632319
WBGene00011813		T16H12.3	T16H12.3b	1396	1669	1819	1106	1211	1178	4.38e-07	-0.661201	0.632351
WBGene00014667		C06A1.4	Pseudogene:C06A1.4	12776.2	9016.46	14078.8	8023.63	8366.91	8943.04	9.9e-05	-0.660843	0.632509
WBGene00001942	his-68	T23D8.6	T23D8.6	1939.57	2119.43	1802.15	1333.46	1436.99	1430.85	0.000530859	-0.660684	0.632578
WBGene00008822		F14H3.3	F14H3.3	825	940	1092	617	720	703	9.63e-07	-0.660652	0.632592
WBGene00017238		F08B4.7	F08B4.7	3373	4509	3798	2642	2963	2736	0.000718894	-0.660339	0.63273
WBGene00020113		R151.10	R151.10.1	2108	3441	2638	1889	2111	1763	0.00801716	-0.660318	0.632739
WBGene00014234	vps-29	ZK1128.8	ZK1128.8a	3820	5140	4619	3051	3438	3212	0.000288115	-0.659954	0.632899
WBGene00021376	blos-7	Y37E11B.3	Y37E11B.3a	801.77	1120.83	989.8	623.92	726.9	716.89	0.00149097	-0.65986	0.63294
WBGene00013381	cyp-31A5	Y62E10A.15	Y62E10A.15a	2163.55	2734.39	3067.96	1791.14	1886.44	1995.13	7.6e-06	-0.659703	0.633009
WBGene00010198	spat-1	F57C2.6	F57C2.6a	3314	3554	4110	2623	2800	2477	9.45e-12	-0.659677	0.63302
WBGene00008371		D1054.3	D1054.3a	3641	6103	4751	3132	3539	3523	0.0078497	-0.659598	0.633055
WBGene00008281		C53D6.4	C53D6.4b	2336	2471	2710	1710	1908	1799	9.36e-10	-0.659437	0.633125
WBGene00013150		Y53F4B.3	Y53F4B.3	1275	1934	1621	1079	1231	1111	0.00299674	-0.659105	0.633271
WBGene00007825		C30H6.8	C30H6.8	686	1037	865	590	653	587	0.00379711	-0.659005	0.633315
WBGene00016048		C24B9.3	C24B9.3b	6594.54	5406	6090.64	4250.94	4537.94	4219.93	1.49e-05	-0.65886	0.633378
WBGene00000392	cdd-2	F49E8.4	F49E8.4	2241	3151	2838	2032	2012	1818	0.000668736	-0.658372	0.633593
WBGene00019439		K06B9.2	Pseudogene:K06B9.2	65.86	121.37	103.45	54.77	56.47	80.93	0.0748445	-0.658336	0.633609
WBGene00013240		Y56A3A.28	Y56A3A.28	1123	1033	1304	820	804	859	2.33e-09	-0.658251	0.633646
WBGene00004798	sip-1	F43D9.4	F43D9.4	108099	92650.8	102126	66554.9	76358.5	75217.3	1.13e-05	-0.657312	0.634059
WBGene00001765	gst-17	F37B1.6	F37B1.6	7	8	3	1	2	2	NA	-0.657197	0.634109
WBGene00013243		Y56A3A.31	Y56A3A.31	1036	1154	1196	804	882	751	3.22e-06	-0.656535	0.6344
WBGene00011216	usp-46	R10E11.3	R10E11.3a.2	1684.95	2267.72	2459.6	1513.22	1547.21	1507.62	4.53e-05	-0.656516	0.634408
WBGene00219944		F41E6.18	F41E6.18	386.61	319.34	368.97	270.96	235.82	258.03	0.000732945	-0.656221	0.634538
WBGene00001281	emb-27	F10B5.6	F10B5.6	4294.14	3930.81	5669.02	3235.89	3274.23	3419.98	6.05e-10	-0.656188	0.634553
WBGene00001095	dars-2	F10C2.6	F10C2.6	1260	1702	1819	1083	1188	1138	8.04e-05	-0.655352	0.63492
WBGene00007927		C34C12.8	C34C12.8	3112	4432	4115	2862	2695	2760	0.000551719	-0.65448	0.635304
WBGene00012395		Y6D1A.1	Y6D1A.1	2146.55	2141	2343.88	1574.88	1720.95	1502.86	2.31e-08	-0.654406	0.635337
WBGene00021541		Y42H9B.3	Y42H9B.3	3779	4756	5163	3128	3359	3345	2.49e-06	-0.653899	0.63556
WBGene00003979	pes-5	T27D12.4	T27D12.4b	842	741	900	569	597	621	7.37e-07	-0.653797	0.635605
WBGene00012795		Y43E12A.3	Y43E12A.3a	777.5	850.77	880.78	570.72	511.27	701.19	0.00100207	-0.653672	0.63566
WBGene00015828	math-14	C16C4.4	C16C4.4b	110.65	185.81	107.82	87.94	89.74	96	0.070916	-0.653341	0.635806
WBGene00007217	tads-1	C01A2.5	C01A2.5	2802	5271	3824	2524	3108	2690	0.0210574	-0.653253	0.635845
WBGene00008417		D2030.7	D2030.7	4161.43	5571.02	5761.56	3519.9	3956.3	3626.91	4.62e-05	-0.653247	0.635848
WBGene00018568		F47E1.4	F47E1.4	275	349	333	193	217	265	0.00531702	-0.653043	0.635938
WBGene00013037		Y49E10.18	Y49E10.18	1067	1062	1442	803	665	1029	0.00278779	-0.652634	0.636118
WBGene00006481	plrg-1	D1054.15	D1054.15b	6699	8311	8709	5495	5791	5798	1.54e-06	-0.652501	0.636176
WBGene00009237		F28H7.3	F28H7.3	3001	3159	3181	2138	2262	2359	2.28e-06	-0.652371	0.636234
WBGene00199339		C41G7.13	C41G7.13	45.42	36.99	44.95	28.61	30.65	25.35	0.0724646	-0.652152	0.636331
WBGene00008145	set-5	C47E8.8	C47E8.8a	2529.78	2023.01	2984.76	1863.72	1932.44	1587.6	1.31e-05	-0.651952	0.636419
WBGene00020953		W02G9.3	W02G9.3	1724	1564	1792	1180	1259	1238	6.31e-08	-0.651782	0.636494
WBGene00001513	gad-1	T05H4.14	T05H4.14	6295	6629	7880	4747	5259	5054	1.43e-14	-0.65162	0.636565
WBGene00014117	clec-91	ZK858.3	ZK858.3	12172	13380	13055	8471	10273	9215	1.42e-05	-0.651072	0.636807
WBGene00011063	cpg-3	R06C7.4	R06C7.4.3	21212.8	29497.9	25074.1	15561	19543.7	19134.3	0.00204863	-0.650792	0.63693
WBGene00044161		C47G2.8	C47G2.8	16.96	37.09	34.37	19.04	21.94	10.08	0.174293	-0.650291	0.637152
WBGene00003704	nhr-114	Y45G5AM.1	Y45G5AM.1a.2	6110	4641	7053	4670	3894	4099	0.000104194	-0.649776	0.637379
WBGene00020943		W02D7.8	W02D7.8	21	37	33	19	18	20	0.131102	-0.649642	0.637439
WBGene00007476		C09E9.1	C09E9.1a	787	910	954	600	665	649	4.07e-06	-0.649544	0.637482
WBGene00019905		R05G9.3	R05G9.3	1057	1475	1630	861	969	1115	0.00147507	-0.649437	0.637529
WBGene00044251		F59C6.12	F59C6.12	178	308	296	180	171	191	0.0190643	-0.64936	0.637563
WBGene00021072		W07B8.4	W07B8.4	4	4	12	2	2	2	NA	-0.649202	0.637633
WBGene00019569		K09D9.12	K09D9.12.1	324	365	494	239	278	317	0.0011119	-0.649128	0.637666
WBGene00004028	pif-1	Y18H1A.6	Y18H1A.6a	2905	2454	3197	2165	2091	1920	1.06e-07	-0.649072	0.63769
WBGene00021704		Y48G9A.11	Y48G9A.11	790	993	978	682	641	663	0.000101453	-0.648785	0.637817
WBGene00021936		Y55F3BL.2	Y55F3BL.2a	1947	2759	2966	1735	1976	1766	0.000321776	-0.648482	0.637951
WBGene00004803	sir-2.4	C06A5.11	C06A5.11	697	1285	1113	639	757	767	0.017089	-0.648346	0.638011
WBGene00022882		ZK1248.13	ZK1248.13	2629	3599	4078	2292	2603	2464	0.000129614	-0.648322	0.638022
WBGene00011587		T07F10.1	T07F10.1a	1450	1126	1914	1078	989	1107	0.000241172	-0.647392	0.638433
WBGene00000798	crn-5	C14A4.5	C14A4.5	836.36	1246.05	1070.15	680.84	767.07	800.61	0.00391732	-0.64736	0.638448
WBGene00018795		F54C4.4	F54C4.4	296	505	373	245	318	259	0.0273562	-0.647081	0.638571
WBGene00045458		F17B5.8	F17B5.8	37	40	31	23	20	27	0.115375	-0.6469	0.638651
WBGene00023418		R06F6.12	R06F6.12	2367.79	2399.69	2853.82	1737.5	1837.1	1950.45	2.01e-10	-0.646806	0.638693
WBGene00020896		T28D9.4	T28D9.4a	6357	6680	7427	4925	5108	4866	1.97e-12	-0.646719	0.638731
WBGene00045291		F23D12.10	F23D12.10	185	284	333	165	213	180	0.0122005	-0.646628	0.638772
WBGene00016165		C27F2.1	C27F2.1	70	99	121	59	52	83	0.0561655	-0.646588	0.638789
WBGene00004282	rab-30	Y45F3A.2	Y45F3A.2	1127	1131	1250	770	889	885	7.36e-07	-0.646478	0.638838
WBGene00012788		Y43D4A.2	Y43D4A.2	16.99	11.02	22.19	8.93	12.86	7.84	0.187784	-0.646399	0.638873
WBGene00005024	sqv-6	Y50D4C.4	Y50D4C.4	2256	2394	3003	1781	1943	1818	1e-12	-0.64632	0.638908
WBGene00001482	fog-2	Y113G7B.5	Y113G7B.5a	2068.31	2305.14	2484.65	1554.5	1732.08	1692.42	6.33e-08	-0.646241	0.638943
WBGene00013239		Y56A3A.22	Y56A3A.22	2883	3538	3707	2388	2574	2372	1.81e-06	-0.645944	0.639074
WBGene00013446		Y66D12A.21	Y66D12A.21	1234	1934	1915	1172	1269	1174	0.00222003	-0.645905	0.639092
WBGene00004286	rab-39	D2013.1	D2013.1	1324	1796	1859	1160	1174	1241	0.000164667	-0.645298	0.639361
WBGene00018769	mnat-1	F53G2.7	F53G2.7.2	4056	4650	4046	3185	3393	2646	0.000970194	-0.645261	0.639377
WBGene00003835	nxf-2	C15H11.6	C15H11.6.2	2159	3038	2997	1853	2152	1881	0.000438491	-0.64525	0.639382
WBGene00017020		D1014.7	D1014.7a	19.54	5	12	1.19	3	8.88	NA	-0.64519	0.639408
WBGene00008535		F02H6.2	F02H6.2	1811	1991	2414	1456	1520	1526	1.23e-10	-0.645147	0.639428
WBGene00013392		Y62H9A.4	Y62H9A.4.2	9926	14058	11713	7717	9409	8557	0.00216719	-0.645122	0.639439
WBGene00022531	morc-1	ZC155.3	ZC155.3	4833	4521	5433	3498	3677	3596	5.7e-14	-0.645066	0.639463
WBGene00010054		F54D5.11	F54D5.11.1	2720	4208	3599	2293	2765	2472	0.00382564	-0.644527	0.639702
WBGene00021056		W06B4.1	W06B4.1	8284	9546	9463	6255	6922	6681	2.28e-06	-0.644521	0.639705
WBGene00007870		C32H11.7	C32H11.7b	154.8	269.18	221.15	134.66	197.47	108.43	0.0630846	-0.644074	0.639903
WBGene00008275	nstp-1	C53B4.6	C53B4.6a	721	1121	1109	653	723	722	0.0029855	-0.644074	0.639903
WBGene00008377		D1054.10	D1054.10	19532	28155	25479	15779	18638	18188	0.00115297	-0.643971	0.639949
WBGene00044326	tag-322	C33H5.10	C33H5.10	2401	3230	3336	2055	2186	2218	8.54e-05	-0.643949	0.639959
WBGene00010622		K07A12.4	K07A12.4b	2878	3077	4058	2300	2466	2466	6.15e-10	-0.643476	0.640169
WBGene00007859	mrps-31	C32A3.2	C32A3.2	966	1388	1352	867	920	873	0.000711248	-0.643404	0.6402
WBGene00002095	ins-12	C17C3.19	C17C3.19	4	24	19	8	5	7	0.205687	-0.643374	0.640214
WBGene00017547	alfa-1	F18A1.6	F18A1.6b.1	4624	4819	6128	3741	3976	3588	3.01e-14	-0.643177	0.640301
WBGene00018007		F33D11.10	F33D11.10	5231	9574	7556	4915	5898	5003	0.0156613	-0.642987	0.640386
WBGene00019551		K09C4.6	K09C4.6	11	25	25	11	7	15	0.195665	-0.642739	0.640496
WBGene00018929		F56B3.3	F56B3.3	43.79	44.15	77.16	33.25	34.1	41.73	0.0728736	-0.642657	0.640532
WBGene00195518		ZK652.14	ZK652.14	9.3	7.84	9.16	5.34	3.29	3.38	NA	-0.64234	0.640673
WBGene00004744	scp-1	D2013.8	D2013.8b	893	1016	1274	691	806	796	3.76e-06	-0.642226	0.640723
WBGene00013248		Y57A10A.3	Y57A10A.3	525.9	754.43	669.66	477.27	500.64	419.29	0.00333859	-0.641886	0.640875
WBGene00006931	vps-26	T20D3.7	T20D3.7a	3724	5104	5058	3090	3534	3396	0.000214733	-0.641869	0.640882
WBGene00011828	nepr-1	T19A6.3	T19A6.3b	3463	5016	4166	2926	3289	2898	0.00238922	-0.641833	0.640898
WBGene00008061		C41G7.3	C41G7.3	6728	6490	7185	5019	5204	4684	5.31e-09	-0.641792	0.640916
WBGene00007609		C15C8.7	C15C8.7	1733	2422	1997	1467	1544	1429	0.00207714	-0.641412	0.641085
WBGene00008427	atg-10	D2085.2	D2085.2	47	118	87	51	60	53	0.116534	-0.641247	0.641159
WBGene00022117		Y71F9AL.12	Y71F9AL.12	2404	3631	3324	2114	2342	2267	0.00175082	-0.640653	0.641422
WBGene00004984	spn-4	ZC404.8	ZC404.8.2	75669	80856	88305	56272	63414	59288	4.42e-10	-0.640646	0.641426
WBGene00011809		T16G12.8	T16G12.8	750	1155	1138	641	742	783	0.00410998	-0.64046	0.641508
WBGene00017919		F29B9.1	F29B9.1	1053	1007	1172	760	772	822	6.43e-08	-0.639918	0.64175
WBGene00021045		W05H7.2	W05H7.2	69.02	69.32	74.52	47.58	44.8	56.47	0.034818	-0.639176	0.642079
WBGene00017053		D2024.5	D2024.5a	3846	4885	4991	3106	3560	3302	2.18e-05	-0.639021	0.642149
WBGene00008721		F12F6.2	F12F6.2	78.68	54.2	40.39	23.71	32.08	52.75	0.164763	-0.638834	0.642232
WBGene00018959		F56D1.1	F56D1.1	4430	5897	6471	3807	4386	3940	5.97e-05	-0.638773	0.642259
WBGene00002985	lig-1	C29A12.3	C29A12.3a	8386	9958	11416	6803	7638	7196	7.55e-08	-0.638689	0.642296
WBGene00019943		R07G3.7	R07G3.7a	5650.79	6203.9	7127.23	4765.55	4873.09	4196.16	9.8e-09	-0.638669	0.642305
WBGene00017889		F28B3.10	F28B3.10	1844	2157	2151	1540	1475	1468	7.9e-06	-0.638647	0.642315
WBGene00013893		ZC434.7	ZC434.7b.3	527.1	674.29	581.98	444.05	457.2	386.89	0.00239503	-0.638583	0.642343
WBGene00004244	puf-8	C30G12.7	C30G12.7	10300	11353	13056	8365	8848	8143	3.57e-12	-0.638524	0.64237
WBGene00012373		W09H1.3	W09H1.3	15.82	21.05	7.69	6.56	2.55	10.27	0.207374	-0.638185	0.642521
WBGene00012878		Y45F10C.2	Y45F10C.2	654.68	1525.4	1164.66	599.41	901.34	790.09	0.0639573	-0.637994	0.642606
WBGene00005011		F26F4.8	F26F4.8	567	905	745	520	597	464	0.0117392	-0.637987	0.642609
WBGene00016767		C49C8.3	C49C8.3	170	364	257	183	182	179	0.0612279	-0.637926	0.642636
WBGene00195164		K12B6.11	K12B6.11	70	83	50	48	53	35	0.109912	-0.637584	0.642788
WBGene00007667	fbxa-97	C18B12.5	C18B12.5	68	143	140	72	75	88	0.077476	-0.636944	0.643074
WBGene00044891		T07C4.12	T07C4.12	763	1115	911	637	689	683	0.00468329	-0.636773	0.64315
WBGene00016495		C37C3.1	C37C3.1a	2200	2573	2605	1770	1949	1668	7.86e-06	-0.636745	0.643163
WBGene00009937	lsl-1	F52F12.4	F52F12.4	5064	6472	5743	4027	4394	4169	0.000289886	-0.636718	0.643175
WBGene00020941		W02D7.5	W02D7.5	477	694	649	408	481	419	0.00293836	-0.636649	0.643205
WBGene00015915		C17G10.1	C17G10.1.2	3542	4859	4666	2844	3319	3297	0.000487234	-0.636602	0.643226
WBGene00009044		F22B5.6	F22B5.6	63	70	45	42	37	41	0.099589	-0.636589	0.643232
WBGene00011819	hal-2	T16H12.11	T16H12.11.1	1612	2303	2082	1346	1560	1430	0.00134345	-0.636564	0.643243
WBGene00019264		H35B03.2	H35B03.2c	1296.8	1574.22	1453.52	940.71	1164.03	1043.93	0.000425325	-0.635902	0.643538
WBGene00001092	dro-1	F53A2.5	F53A2.5	3332	3902	3904	2610	2838	2700	2.91e-06	-0.635761	0.643601
WBGene00006386	taf-5	F30F8.8	F30F8.8.2	2961	4561	4542	2727	2970	2963	0.00177342	-0.635752	0.643605
WBGene00010015	atad-3	F54B3.3	F54B3.3	5838	6212	7570	4671	4923	4754	4.91e-16	-0.635685	0.643635
WBGene00017291		F09E5.14	F09E5.14	247	362	372	215	218	263	0.00776865	-0.635597	0.643674
WBGene00021902	oxy-4	Y54H5A.4	Y54H5A.4	949	1504	1550	901	994	963	0.00344177	-0.635354	0.643783
WBGene00009013	mrps-33	F21D5.8	F21D5.8	1264	2277	1547	992	1328	1280	0.0343976	-0.634489	0.644169
WBGene00013741		Y111B2A.21	Y111B2A.21	114	180	152	106	107	101	0.0268132	-0.634485	0.644171
WBGene00013703		Y106G6D.7	Y106G6D.7	5926	5886	7857	4702	4822	4824	1.85e-15	-0.634396	0.644211
WBGene00009025	phf-34	F21G4.4	F21G4.4	339	455	503	292	305	334	0.00115217	-0.634139	0.644325
WBGene00021443		Y39A3CL.7	Y39A3CL.7a	4178	5895	5465	3716	4116	3436	0.000916228	-0.633983	0.644395
WBGene00009443		F35G12.7	F35G12.7	625.36	1129.44	936.23	608.08	677.05	625.47	0.0173447	-0.633946	0.644412
WBGene00018009	dhhc-3	F33D11.12	F33D11.12.2	2010	4506	3536	2031	2602	2367	0.0446039	-0.633819	0.644468
WBGene00043279		F22D6.8	F22D6.8.2	259.12	462.5	363.33	205.28	273.88	282.9	0.0382564	-0.633516	0.644604
WBGene00000144	apc-10	F15H10.3	F15H10.3a.2	1142	1911	1575	962	1238	1108	0.0128211	-0.633487	0.644616
WBGene00009508	row-1	F37D6.2	F37D6.2b	5439	7170	7442	4454	5273	4849	8.57e-05	-0.633438	0.644639
WBGene00016390		C34B2.5	C34B2.5	1931	3570	2769	1837	2050	1996	0.019088	-0.633413	0.64465
WBGene00017985	neg-1	F32D1.6	F32D1.6b	7524.63	7646.21	8309.3	5506.13	5935.05	5820.27	1.51e-09	-0.633381	0.644664
WBGene00004392	rnr-2	C03C10.3	C03C10.3	19444	24957	24921	15111	17899	17499	9.13e-05	-0.633125	0.644778
WBGene00016592	erl-1	C42C1.15	C42C1.15	1229	2003	1720	1105	1251	1199	0.00694563	-0.633008	0.64483
WBGene00021814		Y53G8AR.7	Y53G8AR.7a	419.34	518.26	568.67	349.58	374.87	369.32	8.04e-05	-0.632825	0.644912
WBGene00022402	lmtr-2	Y97E10AR.7	Y97E10AR.7.2	1483	2567	1936	1321	1575	1385	0.0170247	-0.632688	0.644973
WBGene00003083	lst-1	T22A3.3	T22A3.3a	9870	8955	11030	7127	7619	7186	3.52e-13	-0.632513	0.645052
WBGene00044654	fbxa-85	Y61B8A.4	Y61B8A.4	15	32	29	15	14	17	0.174484	-0.632104	0.645235
WBGene00015291		C01B12.8	C01B12.8	1095	1515	1389	936	1017	953	0.000842014	-0.631873	0.645338
WBGene00015156		B0361.2	B0361.2a	2504	4134	3557	2265	2568	2493	0.00690936	-0.631656	0.645435
WBGene00004750	sea-1	F19B10.9	F19B10.9	891	896	1052	622	669	776	2.18e-05	-0.631531	0.645491
WBGene00001686	gpd-4	F33H1.2	F33H1.2	13805	12160.3	15115.2	9934.26	10675	9560.81	3.58e-10	-0.631462	0.645522
WBGene00006484	tag-138	F08A8.6	F08A8.6	9	4	8	2	1	4	NA	-0.630545	0.645933
WBGene00007429		C08B6.8	C08B6.8a	1336.15	3058.27	2457.4	1494.21	1703.47	1579.02	NA	-0.63021	0.646083
WBGene00010065		F54F7.3	F54F7.3	714	1160	1046	628	816	647	0.0109599	-0.629771	0.646279
WBGene00018290	vps-60	F41E6.9	F41E6.9	5554.72	7241.83	6362.21	4563.71	4857.56	4601.58	0.000459353	-0.629433	0.64643
WBGene00010578		K04H8.3	K04H8.3	25	6	11	8	5	6	0.21951	-0.629306	0.646487
WBGene00022532		ZC155.4	ZC155.4	2773	5326	4731	2618	3269	3194	0.0224227	-0.628922	0.646659
WBGene00007106		B0035.3	B0035.3	2769	4512	3896	2480	2818	2758	0.00641255	-0.628889	0.646674
WBGene00000388	cdc-25.3	ZK637.11	ZK637.11	1860.67	2675.3	2728.17	1583.12	1828.77	1845.86	0.00106088	-0.628788	0.64672
WBGene00003038	lin-56	ZK673.3	ZK673.3	867	1100	1268	698	811	836	0.000178795	-0.628515	0.646842
WBGene00019584	set-12	K09F5.5	K09F5.5	187	188	212	156	145	123	0.00230678	-0.628064	0.647044
WBGene00011615	lsd-1	T08D10.2	T08D10.2	1159	1058	1608	927	955	893	1.24e-06	-0.627819	0.647154
WBGene00000690	col-116	F17E9.1	F17E9.1	33	60	56	40	30	28	0.118903	-0.627449	0.64732
WBGene00007732	spe-44	C25G4.4	C25G4.4	1231	1196	1476	986	979	903	2.58e-10	-0.627341	0.647368
WBGene00000940	dcs-1	Y113G7A.9	Y113G7A.9a	3119	3879	3718	2471	2734	2660	6.63e-05	-0.627276	0.647398
WBGene00008062	set-32	C41G7.4	C41G7.4	943	1162	1236	861	838	741	6.02e-05	-0.627227	0.647419
WBGene00206362		B0041.11	B0041.11.2	155.39	144.57	199.26	112.11	103.81	139.48	0.0079575	-0.627161	0.647449
WBGene00016980		C56G2.5	C56G2.5	551	443	536	421	355	334	0.00144651	-0.627105	0.647474
WBGene00009966		F53B7.3	F53B7.3.1	2169.28	3871.75	3046.85	1990.27	2371.98	2153.51	0.0172887	-0.627077	0.647487
WBGene00001332	eri-1	T07A9.5	T07A9.5d	3208	3883	4457	2720	2919	2814	4.31e-07	-0.627037	0.647505
WBGene00012236		W04A8.1	W04A8.1a	1685.09	1518.68	2050.03	1235.07	1342.92	1276.61	1.19e-10	-0.627024	0.647511
WBGene00003059	lpd-2	C48E7.3	C48E7.3	2368	3652	3117	2187	2349	2095	0.00422671	-0.626255	0.647856
WBGene00011038		R05H5.3	R05H5.3.2	18045	24276	21430	15550	16321	14842	0.00060574	-0.626147	0.647905
WBGene00009153		F26D2.15	F26D2.15	9	14	13	8	5	6	NA	-0.626085	0.647932
WBGene00008232		C50F4.4	C50F4.4	370	541	537	305	329	403	0.00881846	-0.625695	0.648108
WBGene00012205		W02B12.10	W02B12.10	4159	4531	4936	3394	3471	3191	4.03e-09	-0.625435	0.648224
WBGene00007270	rei-1	C03C10.4	C03C10.4	4266.43	7184.59	6058.79	3899.44	4608.82	4124.67	0.00934832	-0.625428	0.648228
WBGene00016822		C50E3.11	C50E3.11	1361	1633	1867	1119	1055	1351	0.000376119	-0.625401	0.64824
WBGene00011959	nyn-1	T23G4.3	T23G4.3	1296	1506	1613	1080	1157	1009	2.51e-06	-0.625228	0.648317
WBGene00022193	ppfr-4	Y71H2B.3	Y71H2B.3	3585	4790	4440	2919	3344	3127	0.000421824	-0.624949	0.648443
WBGene00015759		C14C6.5	C14C6.5	1866	2177	3056	1185	1438	2298	0.0332797	-0.624876	0.648476
WBGene00021170	arx-4	Y6D11A.2	Y6D11A.2	4279	6234	5297	3618	4113	3804	0.00261946	-0.624863	0.648482
WBGene00021711	wago-11	Y49F6A.1	Y49F6A.1	94	48	98	45	55	61	0.0905143	-0.624625	0.648588
WBGene00021465	ekl-7	Y39G10AR.7	Y39G10AR.7a	3318	2476	3112	2296	2302	1911	0.000537978	-0.624386	0.648696
WBGene00014222	trpp-3	ZK1098.5	ZK1098.5	2335	3319	3267	2134	2212	2161	0.000548967	-0.623847	0.648938
WBGene00045483	oxy-5	F56H1.7	F56H1.7	4124	5851	5187	3634	3980	3475	0.00144524	-0.623501	0.649094
WBGene00021747		Y50D4C.2	Y50D4C.2	266.01	208.56	355.48	203.69	194.51	196.48	0.00254739	-0.623443	0.64912
WBGene00003912	pal-1	C38D4.6	C38D4.6a	7442	9589	9776	6053	6832	6782	5.8e-05	-0.623422	0.649129
WBGene00013797		Y116A8C.20	Y116A8C.20	34	74	59	29	49	30	0.150148	-0.623345	0.649164
WBGene00014111	rpc-25	ZK856.10	ZK856.10	1403	2035	1652	1121	1272	1313	0.00581969	-0.623148	0.649253
WBGene00017275		F08F8.10	F08F8.10c	1387.09	1805.68	2102.18	1188.42	1119.38	1502.96	0.00240279	-0.623116	0.649267
WBGene00014034		ZK643.2	ZK643.2	1027	1926	1563	938	1192	1092	0.0261218	-0.623065	0.64929
WBGene00010875		M05D6.2	M05D6.2	5887.8	7141.67	8197.92	4926.81	5392.72	5260.77	6.83e-07	-0.622985	0.649326
WBGene00022198		Y71H2B.11	Y71H2B.11	220	460	380	209	253	276	0.0585269	-0.622973	0.649331
WBGene00007537	fipr-8	C12D8.6	C12D8.6.2	43.54	120.83	47.27	33.77	52.93	45.86	NA	-0.622921	0.649355
WBGene00018595	fbxa-145	F48C1.2	F48C1.2	223	397	350	187	272	226	0.0382669	-0.622531	0.64953
WBGene00050967		C25F9.15	C25F9.15	7	5	14	4	3	4	NA	-0.621922	0.649805
WBGene00009439	mlcd-1	F35G12.1	F35G12.1b	663.97	958.72	1211.28	618.3	434.54	885.99	0.0572087	-0.621854	0.649835
WBGene00012658		Y39A1A.21	Y39A1A.21a	1227.59	1440.51	1264.66	1002.85	986.32	906.62	0.00076028	-0.621714	0.649898
WBGene00021298		Y27F2A.6	Y27F2A.3a	1736.33	1851.02	1590.43	1359.44	1320.41	1129	0.00213467	-0.621597	0.649951
WBGene00022812		ZK742.2	ZK742.2	2035	2241	2814	1673	1762	1775	2.99e-09	-0.621361	0.650058
WBGene00001164	efn-3	F15A2.5	F15A2.5	199	237	212	168	181	116	0.0243771	-0.62067	0.650369
WBGene00002004	hsf-1	Y53C10A.12	Y53C10A.12	5795	4961	6751	4284	4352	4266	3.51e-10	-0.620549	0.650423
WBGene00019274		H43I07.1	H43I07.1	1755	1984	2018	1467	1448	1340	5.58e-06	-0.620445	0.65047
WBGene00022232	exos-2	Y73B6BL.3	Y73B6BL.3	1891	1752	2108	1326	1449	1476	1.31e-08	-0.62041	0.650486
WBGene00021877		Y54G2A.12	Y54G2A.12	1032.87	1436.98	1337.65	936.74	968.18	882.52	0.00108192	-0.620205	0.650579
WBGene00000422	ced-8	F08F1.5	F08F1.5	244.45	416.85	382.26	232.52	294.65	216.7	0.0272368	-0.620136	0.65061
WBGene00003224	mes-6	C09G4.5	C09G4.5	2271.87	2160.12	2718.63	1748.06	1738.74	1797.29	1.11e-12	-0.620035	0.650655
WBGene00012762		Y41E3.1	Y41E3.1d	390.08	372.57	254.59	305.39	245.33	162.8	0.0851824	-0.619544	0.650877
WBGene00011275	psf-1	R53.6	R53.6.2	1960	2783	2558	1581	1975	1784	0.00222552	-0.61933	0.650973
WBGene00011087		R07B7.2	R07B7.2a	4120	3498	4833	3186	3187	2786	3.21e-07	-0.618948	0.651145
WBGene00015590	bath-15	C08C3.2	C08C3.2	1179	1669	1567	1012	1120	1100	0.00129679	-0.618742	0.651239
WBGene00018132		F37A4.2	F37A4.2.2	2646	3919	3285	2373	2437	2400	0.00359008	-0.618354	0.651414
WBGene00021486	lbp-9	Y40B10A.1	Y40B10A.1a	28277	31370	28300	21606	22914	20712	0.00016408	-0.618255	0.651458
WBGene00007928		C34C12.9	C34C12.9	176	184	223	140	142	143	0.000684054	-0.618017	0.651566
WBGene00017999	emc-6	F33D4.7	F33D4.7	1526	2277	1768	1329	1369	1373	0.00774833	-0.617848	0.651642
WBGene00010238		F58B4.5	F58B4.5	1379	2424	2642	1125	1301	2034	0.0564161	-0.617771	0.651677
WBGene00008174		C48B4.11	C48B4.11	4357	6345	5898	4001	4252	3915	0.00125946	-0.617596	0.651756
WBGene00001514	xnd-1	C05D2.5	C05D2.5	11937	8647	12774	8199	8278	7970	6.58e-05	-0.617104	0.651978
WBGene00000189	arl-5	ZK632.8	ZK632.8	1002.46	1425.69	1173	869.57	900.71	870.69	0.00422163	-0.617054	0.652001
WBGene00003508	mut-16	B0379.3	B0379.3b	10260.5	7498.34	11718.6	7556.67	7392.45	6556.95	0.00016929	-0.616964	0.652042
WBGene00014066	rev-1	ZK675.2	ZK675.2	1668	2466	2660	1487	1814	1636	0.00216751	-0.616806	0.652113
WBGene00006212	str-168	Y9C9A.6	Y9C9A.6	28	31	25	25	14	14	0.179744	-0.616618	0.652198
WBGene00219306	linc-4	F13H8.15	WBGene00219306	456.26	509.85	432.16	302.29	421.31	297.51	0.0130163	-0.616453	0.652273
WBGene00206482		B0416.10	B0416.10	76	111	85	58	72	62	0.0610365	-0.615934	0.652507
WBGene00011631		T08G11.4	T08G11.4b.1	2855	3256	3619	2246	2517	2445	1.13e-07	-0.615801	0.652567
WBGene00004823	skr-17	C06A8.4	C06A8.4	2233	3038	3100	1930	2045	2169	0.000379709	-0.615672	0.652626
WBGene00002031	hst-6	Y34B4A.3	Y34B4A.3	664	1074	979	609	705	658	0.00869096	-0.615128	0.652872
WBGene00016057		C24D10.6	C24D10.6	3757	5199	4499	3073	3476	3363	0.00176897	-0.615059	0.652903
WBGene00007128	memb-1	B0272.2	B0272.2	372	519	456	319	339	328	0.00450351	-0.614578	0.653121
WBGene00006440	tag-63	Y47G6A.28	Y47G6A.28	4794	5725	6078	3897	4431	3975	2.52e-06	-0.614558	0.65313
WBGene00206384		D1005.10	D1005.10	5	16	8	5	5	2	NA	-0.614479	0.653166
WBGene00011543	acl-2	T06E8.1	T06E8.1b.2	1951	3687	3096	1967	2264	2055	0.0225711	-0.614344	0.653227
WBGene00005025	sqv-7	C52E12.3	C52E12.3.1	3820	5394	5955	3473	3785	3829	0.000561086	-0.614141	0.653319
WBGene00010038	rheb-1	F54C8.5	F54C8.5	2343	3161	2973	2017	2196	2044	0.000454985	-0.613977	0.653393
WBGene00021418		Y38F2AL.6	Pseudogene:Y38F2AL.6	485.8	771.91	544.39	424.8	460.62	423.47	0.025114	-0.613478	0.653619
WBGene00020027		R12C12.7	R12C12.7	1751	3957	3006.99	1813.01	2230	2128.02	0.0560046	-0.612602	0.654016
WBGene00018661		F52C6.4	F52C6.4	60	81	96	50	59	58	0.0414539	-0.612202	0.654197
WBGene00004163	pqn-82	Y39A3CR.7	Y39A3CR.7	2790	2032	2983	1922	1909	1906	0.000105463	-0.612116	0.654236
WBGene00009372	evl-18	F34D10.2	F34D10.2	4751	4702	6248	3721	4108	3814	1.66e-13	-0.611865	0.65435
WBGene00022463	elpc-1	Y110A7A.16	Y110A7A.16	4724	4306	5786	3637	3831	3532	3.54e-13	-0.611646	0.654449
WBGene00011747	sna-2	T13F2.7	T13F2.7	6482	8141	8666	5577	5975	5711	7.58e-06	-0.611039	0.654725
WBGene00017142		EEED8.14	EEED8.14	1326	1598	1851	1113	1236	1182	3.93e-06	-0.610713	0.654873
WBGene00016486	fbxa-170	C36C9.3	C36C9.3	748	1071	952	595	772	667	0.00602472	-0.609955	0.655217
WBGene00020316	brc-2	T07E3.5	T07E3.5	2574	3290	3510	2244	2435	2264	2.7e-05	-0.609749	0.655311
WBGene00021920	mrps-25	Y55F3AM.1	Y55F3AM.1	2346	3975	2962	2202	2395	2180	0.0184783	-0.609574	0.65539
WBGene00011375		T02E1.2	T02E1.2	2798	3097	4046	2396	2537	2416	2.28e-08	-0.609472	0.655436
WBGene00022118	dnc-5	Y71F9AL.14	Y71F9AL.14.2	860.02	1363.49	1194.38	776.74	853.79	869.34	0.00843611	-0.609055	0.655626
WBGene00013376		Y62E10A.6	Y62E10A.6	954	1409	1495	906	1009	909	0.00208024	-0.608666	0.655803
WBGene00015251		B0546.4	B0546.4a	906.69	1233.32	1248.96	797.98	816.92	882.1	0.000782495	-0.608519	0.65587
WBGene00011319		T01C3.2	T01C3.2	2190	3825	2425	1804	2304	2016	0.0421654	-0.608515	0.655871
WBGene00010437	cox-11	JC8.5	JC8.5a	2025	2392	2533	1679	1759	1736	1.72e-06	-0.608497	0.65588
WBGene00022394		Y97E10AL.3	Y97E10AL.3	1883.99	2486.88	2365.32	1563.69	1747.77	1682.68	0.000414573	-0.608473	0.655891
WBGene00004993	spp-8	C28C12.5	C28C12.5	1638	1500	2159	1077	1138	1615	0.00519496	-0.608265	0.655985
WBGene00235348		Y94H6A.17	Y94H6A.17	85	46	71	42	55	42	0.102494	-0.607817	0.656189
WBGene00007113		B0035.15	B0035.15	1845	3175	2646	1756	1986	1850	0.01429	-0.607776	0.656207
WBGene00000146	ape-1	F46F3.4	F46F3.4a	11331	11095	13986	8637	9191	9333	1.2e-15	-0.607652	0.656264
WBGene00010625		K07C5.2	K07C5.2	1204	2020	1820	1096	1301	1277	0.0123757	-0.607256	0.656444
WBGene00013697	dsbn-1	Y106G6A.5	Y106G6A.5a	3865	5887	4952	3498	3890	3451	0.00545721	-0.607151	0.656492
WBGene00009659		F43G6.7	F43G6.7	1598	1849	1572	1286	1298	1151	0.00173532	-0.60713	0.656501
WBGene00015589		C08A9.9	C08A9.9.1	60	84	74	36	42	70	0.124499	-0.606829	0.656638
WBGene00044746		C53H9.3	C53H9.3	781	1245	910	700	751	699	0.0198755	-0.606642	0.656723
WBGene00016544	math-18	C40A11.1	C40A11.1	90	185	171	85	106	118	0.0875391	-0.606632	0.656728
WBGene00022257	puf-11	Y73B6BL.38	Y73B6BL.38	21113.9	24776.5	23866.6	16227.8	18261.3	17623.3	3.87e-05	-0.606632	0.656728
WBGene00007720		C25D7.10	C25D7.10	3300	3463	3683	2748	2640	2418	1.31e-06	-0.606618	0.656735
WBGene00006404	tag-10	C31C9.1	C31C9.1b	4163	2953	3465	2158	2183	3320	0.0252351	-0.606303	0.656878
WBGene00009005		F21C3.6	F21C3.6	17	21	18	18	7	3	0.2427	-0.606125	0.656959
WBGene00044367		T05A8.8	T05A8.8	24	33	30	21	11	23	0.188468	-0.606075	0.656982
WBGene00014114	tftc-3	ZK856.13	ZK856.13	5320	4469	6889	3918	4217	4172	1.87e-06	-0.605616	0.657191
WBGene00001653	gon-4	K04D7.5	K04D7.5a	5844	6185	8046	4831	5146	4955	8.98e-12	-0.60561	0.657193
WBGene00014663		C01G6.10	Pseudogene:C01G6.10	48	83	83	46	62	39	0.104646	-0.605542	0.657224
WBGene00000500	chn-1	T09B4.10	T09B4.10.2	4209	6109	5910	3637	4267	4073	0.00172693	-0.605524	0.657232
WBGene00006977	zif-1	F59B2.6	F59B2.6	10920.6	11277.4	13968.3	8810.15	9380.18	8851.1	1.41e-18	-0.605135	0.65741
WBGene00017916		F29A7.6	F29A7.6	878	1295	901	731	772	757	0.0205745	-0.605096	0.657428
WBGene00003668	nhr-78	F36A4.14	F36A4.14	258	253	291	209	188	196	0.0004609	-0.604989	0.657476
WBGene00022881		ZK1248.11	ZK1248.11	1747	2397	2433	1589	1644	1636	0.000399922	-0.60486	0.657535
WBGene00022794	snu-23	ZK686.4	ZK686.4	2440	2936	2907	1995	2092	2097	2.87e-05	-0.604741	0.657589
WBGene00002180	jtr-1	Y77E11A.4	Y77E11A.4	1334	2500	1853	1203	1532	1387	0.0364016	-0.604728	0.657595
WBGene00010609	dut-1	K07A1.2	K07A1.2.3	13017	13387	16326	9486	10739	11579	4.06e-07	-0.604634	0.657638
WBGene00007020	mdt-20	Y104H12D.1	Y104H12D.1a	1170	1603	1382	972	1100	1010	0.00275826	-0.604598	0.657654
WBGene00010042	bcs-1	F54C9.6	F54C9.6a.2	2403	3171	3419	2042	2217	2389	0.000302755	-0.604476	0.65771
WBGene00000236	bag-1	F57B10.11	F57B10.11	2480	3818	3074	2170	2439	2306	0.00840788	-0.604216	0.657829
WBGene00015554		C06G3.8	C06G3.8a	1082	1823	1491	989	1127	1100	0.0161266	-0.604143	0.657862
WBGene00004027	pie-1	Y49E10.14	Y49E10.14b	1438.87	1356.73	1841.39	1152.75	1037.28	1238.76	1.06e-05	-0.604003	0.657926
WBGene00004351	rgs-8.1	F52D2.2	F52D2.2	584	617	798.5	466.5	492	523	4.87e-06	-0.603901	0.657972
WBGene00021988	rgs-8.2	Y59E1A.2	Y59E1A.2	584	617	798.5	466.5	492	523	4.87e-06	-0.603901	0.657972
WBGene00011143		R08D7.2	R08D7.2.2	2916	3824	4099	2512	2909	2624	0.000127149	-0.603435	0.658185
WBGene00009820		F47B10.9	F47B10.9	490	931	716	462	578	504	0.0415698	-0.602909	0.658425
WBGene00000148	aph-2	ZC434.6	ZC434.6a	2379	3089	3632	2144	2353	2234	8.12e-05	-0.602577	0.658577
WBGene00022190	josd-1	Y71H2AR.3	Y71H2AR.3	171	364	285	171	204	205	0.0744574	-0.602447	0.658636
WBGene00000773	cpf-1	F28C6.3	F28C6.3	4040.16	5851.44	5002.97	3336.67	3988.24	3717.21	0.00424048	-0.602317	0.658695
WBGene00017269		F08F8.4	F08F8.4	2903	4517	3885	2647	2975	2726	0.00623688	-0.602199	0.658749
WBGene00044639		C24H12.12	C24H12.12	11.95	10.36	14.46	4.23	8	7.13	NA	-0.602153	0.65877
WBGene00008035		C39E9.12	C39E9.12	7459	6002	7970	5040	5408	5534	3.24e-06	-0.602113	0.658788
WBGene00022070		Y67D8C.6	Y67D8C.6	7	21	14	6	7	9	0.245675	-0.601921	0.658876
WBGene00044526		T28A11.22	T28A11.22	61	83	86	51	63	50	0.0502677	-0.601689	0.658982
WBGene00007580		C14B1.9	C14B1.9	9876	14627	13494	8632	10410	9092	0.00305891	-0.601528	0.659056
WBGene00013030		Y49E10.4	Y49E10.4	2185	2830	2839	1787	2055	2007	0.000235271	-0.601515	0.659061
WBGene00016192	bcl-7	C28H8.1	C28H8.1	2788.01	3782.34	3535.78	2407.14	2634.19	2485.5	0.000675373	-0.601364	0.659131
WBGene00007237		C01G10.10	C01G10.10a	380.73	642.31	538.75	300.97	372.99	452.28	0.0424157	-0.601141	0.659232
WBGene00018070		F35H10.5	F35H10.5	515	521	504	359	423	368	0.000994403	-0.601011	0.659292
WBGene00019677		K12H4.2	K12H4.2	663	974	859	550	647	645	0.00705614	-0.60098	0.659306
WBGene00008398		D2005.3	D2005.3	1368.87	2429	1969.83	1157	1563	1476	0.029784	-0.600979	0.659306
WBGene00015188		B0432.7	B0432.7	613	659	965	534	571	540	0.000104507	-0.600903	0.659341
WBGene00020522		T15B7.10	T15B7.10	11.95	22	38.17	6	15.74	17	0.241737	-0.600787	0.659394
WBGene00010905	mrps-34	M88.2	M88.2	1948	2527	2441	1593	1695	1858	0.000633632	-0.600772	0.659401
WBGene00012976	sup-35	Y48A6C.3	Y48A6C.3	1457.26	1866.96	1812.54	1148.6	1476.9	1198.1	0.00118319	-0.600522	0.659515
WBGene00015425		C04E6.11	C04E6.11	3143	3117	4155	2489	2566	2712	5.83e-10	-0.600343	0.659597
WBGene00000520	cku-80	R07E5.8	R07E5.8.2	3350	3794	4544	2763	3085	2887	1.97e-08	-0.600262	0.659634
WBGene00219644	linc-69	B0507.16	WBGene00219644	9	8	13	6	3	6	NA	-0.600219	0.659654
WBGene00012103	clec-12	T27F6.2	T27F6.2	147	134	155	92	115	113	0.00899228	-0.599972	0.659767
WBGene00195057		B0261.9	B0261.9	6	8	7	2	3	4	NA	-0.599882	0.659808
WBGene00009736		F45G2.10	F45G2.10	1385	2135	1952	1230	1428	1381	0.00589973	-0.599604	0.659935
WBGene00020144		T01C8.3	T01C8.3	48	42	45	23	32	38	0.11975	-0.599541	0.659964
WBGene00007107	pfd-4	B0035.4	B0035.4	2447	6174	3547	2502	3464	2639	0.105724	-0.599272	0.660087
WBGene00010546		K03H1.11	K03H1.11	850	1346	1370	798	942	875	0.00724927	-0.599118	0.660157
WBGene00012558		Y37D8A.21	Y37D8A.21	2006	2323	2428	1666	1688	1715	2.85e-06	-0.598633	0.660379
WBGene00006395	taf-11.3	F43D9.5	F43D9.5	253	469	321	232	281	240	0.0610365	-0.598627	0.660382
WBGene00017037		D1069.3	D1069.3b	1773	2159	2300	1560	1550	1552	9.37e-06	-0.598458	0.66046
WBGene00011111	snfc-5	R07E5.3	R07E5.3.2	3779	6073	5090	3450	3974	3620	0.0097001	-0.598241	0.660559
WBGene00013375	srsx-25	Y62E10A.4	Y62E10A.4a	28	37	42	23	27	23	0.124499	-0.598159	0.660596
WBGene00012209	hmg-20	W02D9.3	W02D9.3	2593	2004	2678	1963	1812	1642	0.000202924	-0.597808	0.660757
WBGene00011033		R05D11.5	R05D11.5	1394	2393	1818	1277	1519	1323	0.024166	-0.597729	0.660793
WBGene00007258	hasp-1	C01H6.9	C01H6.9	2203	2583	3055	2011	2107	1728	1.96e-05	-0.597486	0.660905
WBGene00011509		T05H10.4	T05H10.4a	2666	3666	3363	2130	2733	2356	0.00275658	-0.597479	0.660908
WBGene00001235	elb-1	Y41C4A.10	Y41C4A.10	3573	3287	3242	2474	2502	2617	0.000328257	-0.597418	0.660936
WBGene00022857		ZK1127.12	ZK1127.12.2	405.32	486.57	566.45	313.89	377.03	389.97	0.000755092	-0.597346	0.660969
WBGene00015754		C14B9.8	C14B9.8	3346	3751	4865	2865	3111	2942	1.13e-07	-0.597184	0.661043
WBGene00018954		F56C9.11	F56C9.11	2055	2905	2922	1874	2037	1949	0.000880059	-0.597029	0.661114
WBGene00006377	syp-3	F39H2.4	F39H2.4	1245.43	2162.58	1955.51	1220.64	1403.49	1307.65	0.0157808	-0.596707	0.661262
WBGene00016383	zgpa-1	C33H5.17	C33H5.17	673	974	915	605	666	630	0.00325153	-0.596683	0.661273
WBGene00004151	pqn-68	T16G1.10	T16G1.10a	325.91	824.86	486.64	422.36	395.07	330.53	0.117598	-0.596654	0.661286
WBGene00013862	wdr-5.3	ZC302.2	ZC302.2a	6722.56	5876.93	7312.67	4970.32	5201.15	4810.99	4.24e-09	-0.596647	0.661289
WBGene00016129		C26B2.7	C26B2.7a	700	1244	962	626	737	760	0.0326411	-0.59638	0.661412
WBGene00021282	set-21	Y24D9A.2	Y24D9A.2	1465.74	1129.95	1703.86	1042.96	1119.37	1033.04	4.9e-05	-0.596345	0.661428
WBGene00020392	knl-3	T10B5.6	T10B5.6	3835	3968	4315	2862	3083	3184	2.11e-07	-0.596066	0.661555
WBGene00020111		R151.8	R151.8	3839	3724	4807	3102	3080	3111	5.25e-15	-0.595815	0.66167
WBGene00008625	scl-14	F09E8.5	F09E8.5	24	34.15	56.16	10	14.03	39.28	0.242852	-0.595801	0.661677
WBGene00007573		C14B1.2	C14B1.2	4511	6144	5726	3643	4459	4129	0.00151198	-0.595779	0.661687
WBGene00021247		Y22D7AL.9	Y22D7AL.9	478	598	612	395	398	462	0.00128064	-0.595481	0.661824
WBGene00010766		K11B4.1	K11B4.1	2784	4853	3820	2676	2986	2778	0.0204207	-0.595051	0.662021
WBGene00012716		Y39E4B.5	Y39E4B.5	5385	5154	6879	4205	4522	4354	1.03e-14	-0.594975	0.662056
WBGene00185078		F40G9.17	F40G9.17	850	1275	1074	795	855	724	0.00907816	-0.594875	0.662102
WBGene00001020	dnj-2	B0035.2	B0035.2	2427	3587	3559	2185	2498	2422	0.00246858	-0.594562	0.662245
WBGene00018613	skpt-1	F48E8.7	F48E8.7b	7789	7980	9175	5920	6473	6428	6.8e-11	-0.59455	0.662251
WBGene00021781		Y51H7C.3	Y51H7C.3	2302	2911	2622	1821	2106	1955	0.000880355	-0.59442	0.662311
WBGene00021206		Y17G9B.9	Y17G9B.9	4234.49	4334.99	4860.54	3371.27	3463.1	3312.97	1.24e-10	-0.593888	0.662555
WBGene00009627		F42A8.3	F42A8.3	2042	3501	3186	1966	2321	2134	0.0142665	-0.593869	0.662564
WBGene00012908		Y46G5A.18	Y46G5A.18a	2206.42	2076	2459.65	1748.73	1810.49	1517.27	9.12e-07	-0.59384	0.662577
WBGene00022834		ZK973.8	ZK973.8	132	135	120	108	87	88	0.0344669	-0.593766	0.662611
WBGene00019892		R05F9.9	R05F9.9	2011	3271	3168	1891	2257	2082	0.00881862	-0.593602	0.662686
WBGene00017103	klo-2	E02H9.5	E02H9.5	231	252	231	182	168	181	0.00663233	-0.593448	0.662757
WBGene00016381	sgo-1	C33H5.15	C33H5.15a	4302	4195	5193	3382	3561	3389	1.19e-17	-0.5934	0.662779
WBGene00020098		R144.10	R144.10	1921.17	2243.26	2262.31	1746.33	1606.92	1475.33	0.000127258	-0.593103	0.662916
WBGene00004464	rpn-8	R12E2.3	R12E2.3	12818	17703	15190	10925	12251	11090	0.00242259	-0.592909	0.663005
WBGene00008133	efsc-1	C47B2.7	C47B2.7b	832	1158	1181	791	796	775	0.00107252	-0.592754	0.663076
WBGene00000408	cdk-7	Y39G10AL.3	Y39G10AL.3.2	3262	4202	4087	2660	3038	2972	0.000324626	-0.592577	0.663157
WBGene00044206		T26H5.9	T26H5.9a	136	345	238	99	181	206	0.165018	-0.592308	0.663281
WBGene00006389	taf-7.2	Y111B2A.16	Y111B2A.16	1602	2834	2428	1570	1815	1665	0.020072	-0.592151	0.663353
WBGene00007978		C36B1.11	C36B1.11	9876	11991	12595	8277	9328	8347	9.83e-06	-0.592031	0.663408
WBGene00021730		Y49F6C.8	Y49F6C.8	557	791	705	509	502	518	0.00493298	-0.591791	0.663519
WBGene00007985	swah-1	C36F7.2	C36F7.2.2	1368	1648	1691	1105	1283	1154	6.33e-05	-0.591631	0.663592
WBGene00195253		H16D19.5	Pseudogene:H16D19.5	40	66	57	36	30	46	0.135019	-0.591513	0.663646
WBGene00000473	cey-2	F46F11.2	F46F11.2	118345	147564	131369	95223	108672	95647	0.000715621	-0.591227	0.663778
WBGene00011152		R09A8.1	R09A8.1c	609.22	514.88	754.9	459.09	493.33	449.06	2.65e-05	-0.5912	0.663791
WBGene00000525	clc-4	T05A10.2	T05A10.2	11	18	17	6	11	10	0.24146	-0.591198	0.663792
WBGene00017931	picc-1	F29G9.2	F29G9.2a	6117	5097	6696	4163	4612	4696	1.7e-06	-0.590995	0.663885
WBGene00000169	aqp-1	F32A5.5	F32A5.5a	903.31	948.66	1089.19	751.08	662.81	791.18	5.53e-05	-0.590445	0.664138
WBGene00011976		T24B8.2	T24B8.2	2493	3759	3338	2236	2512	2406	0.00501297	-0.590195	0.664253
WBGene00004885	smg-7	Y73B6A.4	Y73B6A.4	1202	1610	1852	1076	1178	1216	0.000617495	-0.589796	0.664437
WBGene00015686		C10G11.6	C10G11.6b	1452	1185	1645	1131	1056	1023	1.47e-05	-0.589454	0.664594
WBGene00022393	abhd-12	Y97E10AL.2	Y97E10AL.2.2	5766	10160	8119	5412	6664	5696	0.024217	-0.588869	0.664864
WBGene00044924		M106.7	M106.7	1398	1637	1578	1091	1266	1127	0.000209828	-0.588853	0.664871
WBGene00016632		C44B7.12	C44B7.12	7518	11390	10868	7073	8096	7042	0.00373641	-0.588525	0.665023
WBGene00015189		B0432.8	B0432.8.1	2177.32	2876.37	2932.02	1893.29	2126.17	1981.91	0.000276645	-0.58818	0.665181
WBGene00008005		C38D4.4	C38D4.4	5127	4869	6535	4034	4280	4159	3.21e-14	-0.587967	0.66528
WBGene00015899		C17E7.4	C17E7.4	3457	3684	4201	2661	2970	2952	1.34e-08	-0.587907	0.665307
WBGene00016446		C35D10.10	C35D10.10	2846	5272	4151	2661	3322	3046	0.0333062	-0.587892	0.665314
WBGene00020403		T10B11.7	T10B11.7b	3018	3761	4233	2699	3126	2431	0.000258249	-0.587583	0.665457
WBGene00013734		Y111B2A.10	Y111B2A.10b	3255	3624	4119	2549	2860	2897	3.9e-07	-0.587557	0.665469
WBGene00019004	xpg-1	F57B10.6	F57B10.6	2256	3229	3582	2070	2420	2255	0.00175823	-0.587466	0.665511
WBGene00018964		F56D2.2	F56D2.2	1791.57	2429.6	2341.15	1589.65	1652.87	1687.2	0.000822094	-0.58727	0.665601
WBGene00000506	cic-1	H14E04.5	H14E04.5	1395	1723	1773	1149	1326	1214	0.000101165	-0.586764	0.665835
WBGene00008246		C50H2.13	C50H2.13	123.94	129.6	148.53	86.98	107.37	103.58	0.0101963	-0.586707	0.665861
WBGene00045273		C08A9.11	Pseudogene:C08A9.11	126	189	176	112	138	110	0.0323371	-0.586624	0.665899
WBGene00016960	vps-33.2	C56C10.1	C56C10.1	3261	3738	4807	2692	3183	2974	8.74e-06	-0.586424	0.665992
WBGene00016154		C27A12.2	C27A12.2	4618	5046	6068	3900	4097	3905	2.25e-11	-0.586175	0.666107
WBGene00004338	rfc-2	F58F6.4	F58F6.4	2995	3860	3327	2356	2709	2618	0.00224572	-0.58598	0.666197
WBGene00010354	cyp-31A2	H02I12.8	H02I12.8	4324.98	5668.74	5885.71	3760.3	4141.83	4051.4	0.000162944	-0.58581	0.666275
WBGene00013140	mop-25.2	Y53C12A.4	Y53C12A.4.2	4594.27	5802.38	5812.85	4089.73	4277.67	3879.68	8.95e-05	-0.585765	0.666296
WBGene00020467		T12F5.2	T12F5.2	1487.62	1600.54	1717.5	1232.66	1324.23	1080.04	2.39e-05	-0.585764	0.666296
WBGene00007760		C27B7.2	C27B7.2	492	947	885	533	605	556	0.0377964	-0.585557	0.666392
WBGene00016695		C45H4.14	C45H4.14b	148.7	82.76	86.31	72.66	73.66	79.05	0.122453	-0.58548	0.666427
WBGene00019005		F57B10.8	F57B10.8	1135	1483	1544	995	1027	1103	0.000441039	-0.585478	0.666429
WBGene00011890	mics-1	T21C9.1	T21C9.1	4086	5456	5943	3652	4089	3882	0.000229379	-0.585465	0.666434
WBGene00008409	mpst-1	D2023.5	D2023.5	2314	3086	2954	1873	2258	2156	0.00129095	-0.585065	0.666619
WBGene00022438		Y110A2AL.1	Y110A2AL.1	9	22	28	10	10	14	0.248946	-0.584983	0.666657
WBGene00017293	bmy-1	F09E5.17	F09E5.17	2468	3583	3196	2291	2419	2234	0.00339883	-0.584962	0.666667
WBGene00015623		C09B8.4	C09B8.4	580	971	1043	618	699	588	0.0174076	-0.584645	0.666813
WBGene00000883	cyn-7	Y75B12B.2	Y75B12B.2.1	99759.9	103077	97280.6	76062.6	78571.6	73679.3	0.000130525	-0.584608	0.66683
WBGene00012950		Y47H9C.7	Y47H9C.7	2635	2840	3263	2174	2235	2220	3.41e-10	-0.584573	0.666847
WBGene00011806	ekl-6	T16G12.5	T16G12.5	3647	3620	4812	2959	3107	3062	7.44e-13	-0.584421	0.666917
WBGene00003928	pas-7	ZK945.2	ZK945.2.1	7507	11491	9541	7214	7605	6566	0.00876142	-0.58441	0.666922
WBGene00001998	hpr-17	F32A11.2	F32A11.2	1980	2382	2520	1593	1743	1859	7.64e-05	-0.584074	0.667077
WBGene00001035	dnj-17	T03F6.2	T03F6.2	4180	4575	5139	3461	3615	3477	9.29e-10	-0.584007	0.667108
WBGene00010037		F54C8.4	F54C8.4b	8528	8577	10593	6509	7197	7289	4.76e-11	-0.583884	0.667165
WBGene00009011		F21D5.6	F21D5.6	2855	3972	3971	2584	2824	2710	0.0008357	-0.583842	0.667185
WBGene00235320		R02F11.11	R02F11.11	4	4	4	1	1	1	NA	-0.583805	0.667202
WBGene00012920		Y46G5A.35	Y46G5A.35	513	680	657	386	508	490	0.00602061	-0.583516	0.667335
WBGene00021311		Y32H12A.2	Y32H12A.2a.1	4291	4849	5212	3448	3803	3650	4.06e-07	-0.583302	0.667434
WBGene00007709	clec-87	C25A1.8	C25A1.8	67515	84293	79279	54116	63220	57841	0.000344735	-0.583132	0.667513
WBGene00008379	secs-1	D1054.13	D1054.13b	798	857	1020	624	710	689	1.03e-06	-0.583049	0.667551
WBGene00044702		F46C3.4	Pseudogene:F46C3.4	177	181.67	250.23	146.51	165.22	141.82	0.00243929	-0.582942	0.667601
WBGene00017177		F02E8.4	F02E8.4	4490	4682	6141	3698	4071	3805	1.76e-10	-0.582708	0.667709
WBGene00017750		F23F1.10	F23F1.10	622	949	738	533	649	542	0.0216329	-0.582695	0.667715
WBGene00006934	vps-54	T21C9.2	T21C9.2b	3723.05	4272.01	5376	3285.14	3536.34	3259.27	3.57e-07	-0.582677	0.667723
WBGene00004125	mdt-30	F44B9.7	F44B9.7	4624	3838	5395	3467	3399	3586	9.9e-07	-0.582389	0.667857
WBGene00001949	hlh-2	M05B5.5	M05B5.5b	349.52	378.68	485.22	319.14	240.08	336.93	0.00731037	-0.582208	0.667941
WBGene00017273	gos-28	F08F8.8	F08F8.8	1543	2491	2308	1445	1739	1541	0.0111792	-0.58214	0.667972
WBGene00014811		M162.9	Pseudogene:M162.9	150	300	213	146	180	153	0.089022	-0.582088	0.667996
WBGene00235094		K08D9.9	K08D9.9	167	325	219	122	206	180	0.11683	-0.582069	0.668005
WBGene00018409		F44B9.8	F44B9.8	5306	6525	7196	4415	4916	5041	3.39e-05	-0.581763	0.668147
WBGene00011194		R10D12.13	R10D12.13a	1099.65	1327.16	1339.85	874.03	986.09	990.5	0.00018871	-0.581698	0.668177
WBGene00014224	mrps-23	ZK1098.7	ZK1098.7	1112	1519	1308	906	1022	1039	0.00503839	-0.581678	0.668186
WBGene00194906		Y53C12A.11	Y53C12A.11	741	959	937	629	731	630	0.00111135	-0.581586	0.668229
WBGene00009226	cyp-37B1	F28G4.1	F28G4.1	20	20	29	12	15	18	0.199202	-0.581047	0.668478
WBGene00219725	linc-63	T03F1.13	WBGene00219725	120	168	119	100	106	93	0.0637657	-0.580943	0.668527
WBGene00022357	kbp-4	Y92C3B.1	Y92C3B.1	1392	2164	1725	1165	1502	1284	0.0190922	-0.580942	0.668527
WBGene00044998		M199.9	M199.9	27	32	17	13	7	24	0.2611	-0.580894	0.66855
WBGene00004312	rba-1	K07A1.11	K07A1.11	6607	8701	8530	5432	6309	6272	0.000653089	-0.580848	0.668571
WBGene00020717	mrpl-4	T23B12.2	T23B12.2	1621	2074	2215	1449	1456	1554	0.000165917	-0.580557	0.668706
WBGene00000965	dhs-1	C01G8.3	C01G8.3	3234	5221	4311	3043	3392	3127	0.0131427	-0.580274	0.668837
WBGene00006558	tbx-39	Y73F8A.16	Y73F8A.16	20.39	22.61	17.15	7.25	20.03	8.42	0.2585	-0.579404	0.66924
WBGene00013862	wdr-5.3	ZC302.2	ZC302.2b	1328.83	1153.78	1753.38	863.93	1068.86	1217.13	0.00246114	-0.579197	0.669336
WBGene00014019		ZK632.12	ZK632.12	2096	3130	3093	1872	2303	2061	0.00494771	-0.579109	0.669377
WBGene00022663	glrx-21	ZK121.1	ZK121.1a	1333	2372	1913	1282	1482	1410	0.0285215	-0.579105	0.669379
WBGene00003080	lsm-6	Y71G12B.14	Y71G12B.14	1121	1616	1135	915	1073	921	0.0261204	-0.57902	0.669419
WBGene00007882		C33A12.3	C33A12.3a	4095.49	4855.41	4911.54	3376.99	3833.94	3342.34	4.33e-05	-0.578733	0.669551
WBGene00001058	dpf-5	R11E3.8	R11E3.8a.1	9940	8653	11422	7436	7818	7579	3.41e-10	-0.578335	0.669736
WBGene00011773	ttr-53	T14G10.3	T14G10.3	2195	3971	3548	2168	2697	2331	0.0271237	-0.578276	0.669764
WBGene00007019	mdt-19	Y71H2B.6	Y71H2B.6	3012	4698	3811	2695	3110	2856	0.0127172	-0.578179	0.669809
WBGene00020823		T26A5.8	T26A5.8	2836.57	3766.35	3557.33	2397.15	2731.49	2572.83	0.000915685	-0.578069	0.66986
WBGene00016411		C34E10.10	C34E10.10	1159	1539	1451	1034	1057	1050	0.00107647	-0.578021	0.669882
WBGene00002148	gon-14	F44C4.4	F44C4.4a	7719	6989	9878	6105	6517	6007	6.25e-10	-0.577976	0.669903
WBGene00007620	ocrl-1	C16C2.3	C16C2.3b	3729.79	5824.9	5999.91	3571	4195.55	3852.72	0.00624276	-0.577882	0.669947
WBGene00007171		B0393.6	B0393.6	9014	6415	9378	6248	6019	6403	0.000540291	-0.57771	0.670027
WBGene00019651		K11D12.12	K11D12.12	362	601	553	344	418	363	0.0237266	-0.577707	0.670028
WBGene00009137	bath-39	F25H9.4	F25H9.4	225	414	398	240	251	267	0.044126	-0.577694	0.670034
WBGene00011117		R07E5.11	R07E5.11	591	1024	941	630	700	564	0.0259691	-0.57746	0.670143
WBGene00017038	dmsr-4	D1069.4	D1069.4	179	168	198	109	118	173	0.0383844	-0.577408	0.670167
WBGene00000369	ccf-1	Y56A3A.20	Y56A3A.20	8965	5616	8211	5889	5470	5701	0.00630543	-0.577291	0.670221
WBGene00016864		C52A10.3	C52A10.3	75	151	156	64	103	100	0.128861	-0.577189	0.670268
WBGene00003043	lip-1	C05B10.1	C05B10.1a	10012.1	8450.11	11575.5	7542.38	7249.26	7961.54	1.4e-06	-0.577183	0.670271
WBGene00008887	tbcd-1	F16D3.4	F16D3.4	5002	5766	7302	4316	4919	4425	2.52e-06	-0.577181	0.670272
WBGene00022822		ZK813.3	ZK813.3	16373	16667	19731	12431	13342	14404	5.14e-08	-0.577111	0.670305
WBGene00009223		F28F8.5	F28F8.5b	1630	1879	1792	1288	1441	1313	0.000216821	-0.577094	0.670313
WBGene00185067		Y54G11A.17	Y54G11A.17	946	2187	1257	1037	1217	930	0.109912	-0.57706	0.670328
WBGene00008533		F02E9.10	F02E9.10c.1	3136	3562	4202	2611	2885	2788	9.57e-08	-0.577008	0.670353
WBGene00016944	uri-1	C55B7.5	C55B7.5.2	4523	5647	5926	3967	4336	3933	3.87e-05	-0.576544	0.670568
WBGene00008526		F02D10.6	F02D10.6	324	481	465	287	343	320	0.0111138	-0.575961	0.670839
WBGene00012650	orc-1	Y39A1A.12	Y39A1A.12	8498	9203	10356	7035	7428	6988	2.96e-10	-0.575716	0.670953
WBGene00008431	piga-1	D2085.6	D2085.6	1083	1555	1689	1050	1145	1055	0.00218894	-0.575419	0.671091
WBGene00011648	cni-1	T09E8.3	T09E8.3	5044	4975	4892.26	3765	3982	3670	0.000105534	-0.5753	0.671147
WBGene00010286		F58H1.3	F58H1.3a	1388.09	1903.26	1860.33	1216.37	1359.47	1323.69	0.00139405	-0.575284	0.671154
WBGene00010687		K08F9.4	K08F9.4	4083	5513	5607	3678	3991	3852	0.000450954	-0.575184	0.671201
WBGene00018666	bath-6	F52C6.9	Pseudogene:F52C6.9	101	160	189	111	104	112	0.0458212	-0.575152	0.671215
WBGene00016144	mmab-1	C26E6.11	C26E6.11	1562	2448	2051	1459	1687	1413	0.0139849	-0.575093	0.671243
WBGene00010542		K03H1.7	K03H1.7	3346.51	4143.92	3940.65	2852.1	3121.29	2740.23	0.000333999	-0.575062	0.671258
WBGene00050936		ZK856.16	ZK856.16	1158	1232	1103	902	926	837	0.00170476	-0.574861	0.671351
WBGene00021314		Y32H12A.6	Y32H12A.6	258	404	370	208	269	287	0.0345614	-0.574782	0.671388
WBGene00007012	mdt-4	ZK546.13	ZK546.13	3807.14	3465.5	4226.12	2869.79	2910.3	3006.14	5.8e-09	-0.574513	0.671513
WBGene00011664		T09F3.5	T09F3.5	1503	1393	1969	1189	1238	1260	9.44e-08	-0.574441	0.671547
WBGene00013857	orc-5	ZC168.3	ZC168.3a	4285	5510	5721	3664	4205	3923	0.000171582	-0.574188	0.671664
WBGene00015270		C01B4.6	C01B4.6	379.5	365.5	440	298.5	309.5	293	2.88e-05	-0.573908	0.671794
WBGene00044734		Y19D10A.16	Y19D10A.16	379.5	365.5	440	298.5	309.5	293	2.88e-05	-0.573908	0.671794
WBGene00009010		F21D5.5	F21D5.5	1841	3219	2780	1686	2108	2049	0.0275576	-0.573194	0.672127
WBGene00017801		F26A1.1	F26A1.1	3323	5518	4763	3052	3768	3386	0.0179534	-0.572813	0.672305
WBGene00011268	pde-12	R17.2	R17.2	3058	3058	3803	2404	2488	2674	3.86e-09	-0.572688	0.672363
WBGene00012966	exos-1	Y48A6B.5	Y48A6B.5	1608	2450	1726	1347	1549	1465	0.028021	-0.572575	0.672416
WBGene00000265	brd-1	K04C2.4	K04C2.4.1	2874	2588	3629	2414	2280	2210	1.19e-07	-0.572393	0.6725
WBGene00021485		Y40A1A.3	Y40A1A.3	66.41	78.15	82.61	46.3	55.99	64.11	0.0642682	-0.572388	0.672503
WBGene00000375	cyp-44A1	ZK177.5	ZK177.5.2	2159	2531	2762	1737	2042	1907	1.65e-05	-0.571986	0.67269
WBGene00008007		C38D4.7	C38D4.7	93	93	98	82	75	51	0.0667945	-0.571904	0.672728
WBGene00008722		F12F6.7	F12F6.7.2	2859	3939	4402	2497	3043	2901	0.00172567	-0.57171	0.672819
WBGene00000765	coq-5	ZK652.9	ZK652.9	2563	4047	3540	2396	2656	2600	0.0105334	-0.571681	0.672833
WBGene00001808	gut-2	T10G3.6	T10G3.6a	2509	3309	3087	2209	2380	2198	0.000937485	-0.571613	0.672864
WBGene00007188		B0464.9	B0464.9	2358	2308.88	2757.04	1814.86	1935	1938.46	1.79e-10	-0.571417	0.672956
WBGene00011883	mrpl-50	T21B10.1	T21B10.1	2039	3479	2657	1825	2262	2045	0.0314137	-0.57127	0.673024
WBGene00219315		F07E5.12	F07E5.12	22	25	23	23	10	11	0.246619	-0.571117	0.673095
WBGene00021476	nsun-4	Y39G10AR.21	Y39G10AR.21a	1447.05	1425.06	1615.85	1167.5	1140.97	1132.17	1.4e-07	-0.570775	0.673255
WBGene00008641	pch-2	F10B5.5	F10B5.5	2158.86	2960.19	3340.98	1988.11	2193.77	2203.02	0.00100048	-0.570589	0.673342
WBGene00016169		C27F2.7	C27F2.7	1261.36	1253.23	1661.68	1008.06	1058.32	1112.6	1.15e-07	-0.570299	0.673477
WBGene00000815	csn-3	Y38C1AA.2	Y38C1AA.2	3901	5677	5402	3568	4083	3709	0.00322499	-0.569819	0.673701
WBGene00011225		R10H10.7	R10H10.7	2393	2218	3550	1988	2020	2123	0.000109825	-0.569569	0.673818
WBGene00022168		Y71H2AM.3	Y71H2AM.3	1289	1532	1796	1147	1263	1107	1.64e-05	-0.569167	0.674006
WBGene00009667		F43G9.4	F43G9.4	2667.02	3385.45	3609.62	2356.42	2581.26	2432.66	8.06e-05	-0.569145	0.674016
WBGene00008418		D2030.8	D2030.8	3616	4407	4728	3069	3453	3226	2.14e-05	-0.569006	0.674081
WBGene00015023		B0205.9	B0205.9	3114	3603	3960	2648	2909	2623	1.36e-06	-0.568792	0.674181
WBGene00086568		Y2H9A.6	Y2H9A.6b	18	29	44	16	19	24	0.21709	-0.568627	0.674258
WBGene00011914		T22C1.3	T22C1.3	2791	3709	4308	2547	2867	2766	0.000478402	-0.56861	0.674266
WBGene00007459		C08F11.12	C08F11.12.2	746.32	1909.6	1474.34	658.59	1098.66	1173.91	0.142399	-0.568403	0.674363
WBGene00021933		Y55F3AR.2	Y55F3AR.2	2633	3253	3061	2219	2467	2169	0.000533157	-0.568048	0.674529
WBGene00013432		Y66D12A.6	Y66D12A.6	742	876	800	608	646	597	0.00136692	-0.567714	0.674685
WBGene00017711		F22E5.13	F22E5.13.1	71.01	74.06	91.97	73.01	48.27	50.43	0.0800054	-0.567592	0.674742
WBGene00021651	miro-3	Y47G6A.27	Pseudogene:Y47G6A.27	173.04	132.74	184.29	144.99	98.47	119.7	0.0386755	-0.567309	0.674874
WBGene00013779		Y116A8B.1	Y116A8B.1	31.67	32.59	30	22.05	28.9	13.58	0.207271	-0.567183	0.674934
WBGene00015744		C13F10.5	C13F10.5	1214	1415	1546	1054	1123	1021	7.49e-06	-0.567175	0.674937
WBGene00004985	spo-11	T05E11.4	T05E11.4b	1976	3617	3191	2001	2381	2180	0.031305	-0.566881	0.675075
WBGene00009776		F46B6.12	F46B6.12	1028	1685	1536	990	1144	1065	0.0161266	-0.566481	0.675262
WBGene00013297		Y57G11B.5	Y57G11B.5	6269	9396	7038	5365	6518	5364	0.02139	-0.566315	0.67534
WBGene00011010		R04D3.2	R04D3.2	2101.35	2323.86	2465.76	1573.86	1911.89	1803.68	4.46e-05	-0.566284	0.675354
WBGene00000247	bec-1	T19E7.3	T19E7.3a	1517	2355	2073	1538	1573	1391	0.0111228	-0.565914	0.675528
WBGene00006590	toc-1	ZC395.3	ZC395.3b	4092	5161	4873	3471	3916	3447	0.000596662	-0.565875	0.675546
WBGene00012237		W04A8.2	W04A8.2	145	180.92	156	109.98	136.98	117.92	0.0293489	-0.565787	0.675587
WBGene00015642		C09E7.8	C09E7.8b	2112.62	2213.97	2831.24	1768.1	1875.43	1836.9	3.96e-10	-0.565716	0.67562
WBGene00000985	dhs-22	C15H11.4	C15H11.4.1	6409	10406	9442	6081	7235	6519	0.012951	-0.565609	0.67567
WBGene00003784	nos-2	ZK1127.1	ZK1127.1.1	11616.5	10946.4	12688.1	8663.23	9559.91	8958.14	5.31e-09	-0.565391	0.675772
WBGene00086566		C08H9.16	C08H9.16	1830	2415	2542	1709	1759	1710	0.000319492	-0.565303	0.675814
WBGene00013383	aptf-2	Y62E10A.17	Y62E10A.17a	1096	1163	1186	882	916	853	3.8e-05	-0.565298	0.675816
WBGene00011690		T10C6.9	Pseudogene:T10C6.9	7.36	15.35	19.17	6.59	10.87	7.58	0.280408	-0.565006	0.675952
WBGene00018006	hpo-3	F33D11.9	F33D11.9a	5102	6449	7353	4318	5037	5040	0.000224975	-0.565001	0.675955
WBGene00044236		C17E4.11	C17E4.11	489	789	660	476	542	442	0.026672	-0.564926	0.67599
WBGene00021682		Y48G1C.9	Y48G1C.9.2	1216	1549	1342	1018	1160	966	0.00443376	-0.564906	0.675999
WBGene00011834	dvc-1	T19B10.6	T19B10.6.3	7683.1	9205.05	9858.97	6479.94	7232.62	6825.8	8.77e-06	-0.564754	0.676071
WBGene00016964		C56C10.7	C56C10.7b.3	2959.87	4125.73	4061.82	2609.84	3036.46	2852.79	0.001949	-0.564231	0.676316
WBGene00008528		F02E9.1	F02E9.1	2135	3096	2749	2018	2066	1999	0.00502143	-0.564172	0.676343
WBGene00001435	fkh-3	C29F7.4	C29F7.4a	639.34	846.7	836.57	550.77	665.68	554.34	0.00293469	-0.564146	0.676356
WBGene00007299		C04F12.5	C04F12.5	913	1307	1133	822	897	836	0.00727535	-0.564106	0.676374
WBGene00004298	rad-54	W06D4.6	W06D4.6	2425	2378	3353	2071	2147	2006	3.88e-08	-0.564043	0.676404
WBGene00007387	jmjd-5	C06H2.3	C06H2.3	904	1616	1449	888	1046	1035	0.0322712	-0.563961	0.676442
WBGene00022381	ubxn-2	Y94H6A.9	Y94H6A.9b	7746.73	6935.38	7689.35	5932.07	5845.81	5467.43	1.86e-05	-0.56391	0.676466
WBGene00007234		C01G10.7	C01G10.7	1278.25	2020.43	1709.13	1166.11	1297.29	1328.45	0.016496	-0.563884	0.676478
WBGene00014203		ZK1058.3	ZK1058.3	557.52	677.54	705.26	489.52	501.82	494.66	0.000254467	-0.563819	0.676509
WBGene00019503	tbce-1	K07H8.1	K07H8.1	2193.26	2241.58	3167.34	1869.68	1919.54	1994.15	1.9e-06	-0.563775	0.67653
WBGene00022107		Y71F9AL.1	Y71F9AL.1	1851	2116	2342	1595	1633	1621	7.85e-07	-0.563675	0.676577
WBGene00012577		Y37H9A.2	Y37H9A.2	26	37	26	22	22	17	0.205606	-0.563583	0.67662
WBGene00007531		C11H1.7	C11H1.7b	4.6	13.2	8.59	5.31	4.18	1.18	NA	-0.563469	0.676673
WBGene00011697		T10H4.4	T10H4.4	14	19	12	2	14	7	0.286453	-0.563378	0.676716
WBGene00008780	hxk-1	F14B4.2	F14B4.2a	15166	13925	17073	11442	12174	11980	4.58e-11	-0.563364	0.676722
WBGene00022883		ZK1248.15	ZK1248.15	3220	4140	4186	2869	3200	2781	0.000347071	-0.563329	0.676739
WBGene00019800	mtss-1	PAR2.1	PAR2.1	5651	6329	5846	4600	4490	4649	0.000445245	-0.562909	0.676936
WBGene00007237		C01G10.10	C01G10.10b	226.27	163.69	271.25	170.03	186.01	135.72	0.0241104	-0.562763	0.677004
WBGene00015238		B0511.13	B0511.13a	2789	3586	3608	2457	2748	2453	0.000334423	-0.562539	0.677109
WBGene00022222		Y73B3A.21	Pseudogene:Y73B3A.21	230.2	262.29	288.82	203.64	192.27	199.2	0.0015469	-0.562344	0.677201
WBGene00014036		ZK643.5	ZK643.5	3277.44	4171.5	4307.94	2841.89	3184.64	2995.55	0.000170382	-0.561967	0.677378
WBGene00018240	cox-17	F40G9.2	F40G9.2	386	511	389	326	342	311	0.0235842	-0.561637	0.677533
WBGene00018831		F54E7.9	F54E7.9	670	1137	1041	595	746	791	0.0350993	-0.561441	0.677625
WBGene00023355		W02F12.1	Pseudogene:W02F12.1	268.55	245.06	236.54	185.05	218.78	167.98	0.0181802	-0.561434	0.677628
WBGene00009098	ehbp-1	F25B3.1	F25B3.1	6477	7218	8795	5559	6208	5509	6.59e-08	-0.561423	0.677634
WBGene00013362	algn-7	Y60A3A.14	Y60A3A.14	681.32	1096.71	1017.03	694.04	794.32	620.36	0.0210341	-0.561209	0.677734
WBGene00012806		Y43F4B.9	Y43F4B.9b.3	1031.85	1679.1	1505.94	974.64	1136.05	1078.61	0.0177475	-0.561179	0.677748
WBGene00007202		B0564.2	B0564.2a	751	1109	948	621	808	705	0.0173692	-0.561093	0.677788
WBGene00008750		F13E9.1	F13E9.1	3130	3688	4097	2649	2946	2801	3.7e-06	-0.56101	0.677827
WBGene00022466		Y119C1A.1	Y119C1A.1	3595	4166	4493	3030	3377	3038	3.94e-06	-0.560974	0.677844
WBGene00019465	acl-14	K07B1.5	K07B1.5b	3764.47	5846.08	5410.52	3463.22	3981.33	3964.37	0.00964428	-0.560764	0.677943
WBGene00022462		Y110A7A.15	Y110A7A.15b	190.3	201.14	159.93	143.84	148.84	125.18	0.0429063	-0.560653	0.677995
WBGene00009944	mtcu-2	F52H3.2	F52H3.2	2905.29	2845.56	3642.33	2471.3	2339.07	2413.9	2.96e-10	-0.560645	0.677999
WBGene00012569	fbxc-46	Y37H2A.9	Pseudogene:Y37H2A.9	185	318	261	202	187	181	0.054526	-0.560599	0.678021
WBGene00009665	lmd-1	F43G9.2	F43G9.2a	2446.98	3650.55	3211.38	2247.58	2598.74	2257.34	0.00854678	-0.560529	0.678053
WBGene00015160		B0361.6	B0361.6	3227	4705	4688	3058	3402	3160	0.00305064	-0.560497	0.678068
WBGene00010061		F54E12.2	F54E12.2.1	15036	13821	18586	11667	12471	12363	7.13e-12	-0.560408	0.67811
WBGene00003705	nhr-115	T27B7.4	T27B7.4b	133.69	187.03	215.19	131.34	130.88	139.13	0.021199	-0.560395	0.678117
WBGene00009055		F22D6.14	Pseudogene:F22D6.14	265.54	498.44	349.52	262.92	306.13	260.49	0.0786885	-0.560267	0.678177
WBGene00000816	csn-4	Y55F3AM.15	Y55F3AM.15	4145	5702	5749	3599	4362	3963	0.00192907	-0.559963	0.678319
WBGene00000413	cdt-1	Y54E10A.15	Y54E10A.15	3372	2571	3603	2405	2539	2371	8.66e-05	-0.559942	0.678329
WBGene00002151	irk-3	K04G11.5	K04G11.5	174	316	311	157	199	231	0.0791491	-0.559502	0.678537
WBGene00008428		D2085.3	D2085.3	2385	2390	3399	2106	2096	2042	4.54e-07	-0.559491	0.678542
WBGene00000249	bir-1	T27F2.3	T27F2.3.2	4169	5059	4783	3430	3881	3502	0.000423709	-0.559451	0.67856
WBGene00008364	slc-25A26	D1046.3	D1046.3	1133	1668	1541	1074	1117	1121	0.00619833	-0.559216	0.678671
WBGene00016524		C39B5.6	C39B5.6	1592	1727	1809	1279	1381	1306	5.77e-06	-0.558849	0.678844
WBGene00007972	prp-4	C36B1.5	C36B1.5	2123	3142	3212	2041	2224	2188	0.00404579	-0.558384	0.679062
WBGene00044540		K09H11.10	K09H11.10	5	8	7	2	4	3	NA	-0.558315	0.679095
WBGene00006706	ubc-9	F29B9.6	F29B9.6	20347.5	21395.1	23539.3	16353.8	17380.9	16860.2	4.24e-09	-0.55825	0.679125
WBGene00021636	pcaf-1	Y47G6A.6	Y47G6A.6	3152.52	3837.44	4510.62	2753.89	3119.6	2948.72	2.85e-05	-0.558109	0.679192
WBGene00010783	mrpl-36	K11H3.6	K11H3.6	1549	2844	2049	1523	1708	1628	0.0506043	-0.557805	0.679335
WBGene00020300	tag-261	T07A9.13	T07A9.13b	1383	1935	1882	1209	1459	1311	0.00366343	-0.557713	0.679378
WBGene00017888	acl-11	F28B3.9	F28B3.9	570	732	807	509	552	552	0.000713303	-0.557647	0.679409
WBGene00016609		C43E11.12	C43E11.12a.1	1327	1762	1649	1069	1281	1284	0.00382916	-0.557311	0.679568
WBGene00000813	csn-1	Y59A8A.1	Y59A8A.1	2995	4040	4421	2770	3057	2940	0.000633632	-0.556907	0.679758
WBGene00011970	rlbp-1	T23G11.5	T23G11.5a	3130.59	4575.46	4439.25	2767.71	3308.04	3200.93	0.00550371	-0.556654	0.679877
WBGene00022785		ZK652.6	ZK652.6a	3167	4133	4183	2677	3172	2980	0.000760161	-0.556628	0.679889
WBGene00017003		D1007.5	D1007.5a	3145	3512	4254	2694	2945	2773	3.65e-08	-0.55657	0.679917
WBGene00001034	dnj-16	R74.4	R74.4b	2710	3783	3635	2512	2843	2416	0.00295293	-0.556248	0.680069
WBGene00004308	rap-2	C25D7.7	C25D7.7	3256	3636	3561	2705	2729	2668	7.01e-05	-0.556112	0.680133
WBGene00008212		C49F5.8	C49F5.8	27.44	35	42.98	22.89	23.41	28.27	0.167505	-0.555915	0.680225
WBGene00004086	pph-4.2	Y49E10.3	Y49E10.3a	5881	7024	6600	4897	5412	4796	0.000425655	-0.555734	0.680311
WBGene00006431	tag-52	C02F12.4	C02F12.4	1262	1265	1780	1062	1117	1121	1.55e-06	-0.555666	0.680343
WBGene00013391		Y62H9A.3	Y62H9A.3	11335	12232	13037	8899	9559	9912	2.65e-06	-0.555625	0.680362
WBGene00017485		F15E6.4	F15E6.4	767	1207	998	517	750	945	0.078636	-0.555227	0.68055
WBGene00001427	fkb-2	Y18D10A.19	Y18D10A.19	31156.9	31829.3	31339.6	25829.8	24900.7	22452.9	0.000231387	-0.555075	0.680622
WBGene00010260	ddx-17	F58E10.3	F58E10.3b	1073.09	618.45	916.18	633.34	691.56	647.65	0.0263575	-0.554916	0.680697
WBGene00001585	gfl-1	M04B2.3	M04B2.3	1608	2243	2047	1453	1560	1523	0.00373974	-0.554148	0.681059
WBGene00008082	com-1	C44B9.5	C44B9.5	3394	2894	3871	2649	2681	2518	1.83e-07	-0.554144	0.681061
WBGene00012807		Y43F4B.10	Y43F4B.10.2	1535	2870	2051	1423	1826	1621	0.0628034	-0.553981	0.681138
WBGene00003870	ooc-5	C18E9.11	C18E9.11a	4384	6290	6119	4025	4528	4333	0.00309418	-0.553898	0.681177
WBGene00019357	cpg-8	K03B4.7	K03B4.7a	5736.75	5788.19	5543.04	4112.53	4696.1	4454.8	0.000498665	-0.55378	0.681233
WBGene00011930		T22G5.3	T22G5.3	386	614	720	409	460	421	0.0222155	-0.553511	0.68136
WBGene00008402	wdfy-2	D2013.2	D2013.2.2	3611.86	4862	4654.01	3225.01	3393.41	3498	0.00149927	-0.553135	0.681538
WBGene00006958	wve-1	R06C1.3	R06C1.3a	4672	4018	5623	3590	3779	3675	5e-08	-0.553127	0.681541
WBGene00018010		F33E11.2	F33E11.2	5299	4686	5983	4030	4274	4078	1.94e-09	-0.552998	0.681602
WBGene00009004	pfd-6	F21C3.5	F21C3.5	3277	6312	4376	3149	4032	3353	0.0690499	-0.552916	0.681641
WBGene00018721	polh-1	F53A3.2	F53A3.2	5060	5816	6530	4229	4799	4454	1.39e-06	-0.552678	0.681754
WBGene00007704	mdt-21	C24H11.9	C24H11.9	342	487	436	316	364	286	0.0183059	-0.552605	0.681788
WBGene00016209		C29E4.12	C29E4.12	1601	2793	2143	1599	1640	1725	0.0383033	-0.552563	0.681808
WBGene00017831		F26F4.12	F26F4.12	1066	1421	1347	915	1061	979	0.00257488	-0.552485	0.681845
WBGene00000867	cyb-2.2	H31G24.4	H31G24.4.2	18354.5	21341.4	22249.6	15187.9	17206.1	15692.8	1.3e-05	-0.552479	0.681848
WBGene00003184	mei-2	F57B10.12	F57B10.12	7843	8598	9425	6195	6888	6988	1.63e-06	-0.552403	0.681883
WBGene00022590		ZC317.7	ZC317.7	1010.25	960.99	1128.51	697.21	910.82	788.15	0.000213577	-0.552214	0.681973
WBGene00045237	mrt-1	F39H2.5	F39H2.5.2	2847.57	2648.42	3503.49	2204.36	2325.51	2427.35	1.1e-08	-0.552092	0.68203
WBGene00007761	rad-26	C27B7.4	C27B7.4	5257	4688	6759	4335	4375	4156	6.3e-08	-0.552084	0.682034
WBGene00011635		T09A5.7	T09A5.7	2004	3072	2922	1850	2137	2124	0.00993771	-0.552021	0.682064
WBGene00010476	rnf-113	K01G5.1	K01G5.1	2394	2423	2891	1961	2024	2002	1.47e-11	-0.551814	0.682162
WBGene00001811	haf-1	C30H6.6	C30H6.6	241.52	251.24	307.41	212.64	177.55	220.91	0.00443746	-0.551763	0.682186
WBGene00018416	retr-1	F44E2.2	F44E2.2c	10243.6	9945.37	12039.8	8629.44	8885.32	7484.38	2.32e-07	-0.55174	0.682197
WBGene00004064	pms-2	H12C20.2	H12C20.2a	4442.64	4369.09	5778.86	3577.11	3896.46	3814.45	3.38e-11	-0.551519	0.682301
WBGene00006566	tgt-1	ZK829.6	ZK829.6	1258	1595	1637	1042	1231	1191	0.000805436	-0.551517	0.682302
WBGene00015083	egg-1	B0244.8	B0244.8	39738	41335	46437	30610	35292	33332	7.07e-08	-0.550862	0.682612
WBGene00007168		B0393.3	B0393.3	11652	11126	14195	9064	10068	9584	3.53e-13	-0.550584	0.682743
WBGene00000250	bir-2	C50B8.2	C50B8.2	3521	3063	3897	2539	2718	2865	2.85e-06	-0.55032	0.682869
[truncated: 16,472 more rows]

## Sheet: C. S5.15.out
wormbase_id	gene_name	sequence	Gene ID	EV1	EV2	EV3	sams5_1	sams5_2	sams5_3	padj	log2FoldChange	foldChange
[truncated: 17,758 more rows]

[truncated: 3 more sheets: D. Cat1_all, E. Cat2_all, F. Cat3_all]
