# Supplementary material for: S-adenosylmethionine synthases specify distinct H3K4me3 populations and gene expression patterns during heat stress
Source: eLife. 2023 Feb 9;12:e79511. doi: 10.7554/eLife.79511 (PMC9984191; doi:10.7554/eLife.79511)
Supplement: Supplementary file 4. — Tabs show RNA seq from control (A), sams-1 (B) or sams-4 (C) animals subjected to heat shock that was used for comparison with C&T data. Differential genes were identified using Deseq2 in DolphinNext. Data for control and sams-1 RNAi animals is from Ding et al., 2018. WormCat batch output of two-fold regulated genes for Categories 1, 2, and 3 are in tabs (E-G). Highlighting denotes genes with significantly p values. NS is not significant, NV is no value, RGS is regulated gene set. [file elife-79511-supp4.xlsx]

## Sheet: Legend
Supplementary File 4. Limited acivation of heat shock response in sams-4 RNAi animals.
Tabs show RNA seq from control (A), sams-1 (B) or sams-4 (C) animals subjected to heat shock that was used for comparison with C&T data. Differential genes were identified using Deseq2 in Dolphinnext. Data for control and sams-1 RNAi animals is from Ding, et al. WormCat batch output of two fold regualted genes for Categories 1, 2 and 3 are in tabs E-G. Highlighing denotes genes with significantly…
Index of Tabs
A. control.15.37
B. sams1.15.37
C. sams4.15.37
D. Cat1
E. Cat2
F. Cat3

## Sheet: A. control.15.37
wormbase_id	gene_name	sequence	padj	log2FoldChange	pvalue	foldChange
WBGene00019136		F59H6.5	1.61e-58	9.15403	3.82e-62	569.69
WBGene00002018	hsp-16.41	Y46H3A.2	2.53e-67	8.33751	1.5e-71	323.475
WBGene00002016	hsp-16.2	Y46H3A.3	4.5e-65	8.28926	5.34e-69	312.836
WBGene00012621		Y38H6C.8	2e-55	8.26383	5.93e-59	307.369
WBGene00012618	dct-10	Y38H6C.5	1.93e-60	8.09143	3.44e-64	272.749
WBGene00021098	fbxb-14	W08F4.9	3.33e-48	7.88383	1.98e-51	236.194
WBGene00002017	hsp-16.11	T27E4.2	7.89e-54	7.71989	2.81e-57	210.824
WBGene00018020		F33H12.6	3.48e-38	7.71418	3.1e-41	209.99
WBGene00002019	hsp-16.48	T27E4.3	3.8e-51	7.53964	1.8e-54	186.062
WBGene00002020	hsp-16.49	T27E4.9	3.8e-51	7.53964	1.8e-54	186.062
WBGene00013154		Y53F4B.7	4.65e-40	7.27253	3.31e-43	154.614
WBGene00013155		Y53F4B.8	1.58e-48	7.06504	8.41e-52	133.903
WBGene00013172		Y53F4B.26	8.91e-33	6.98986	8.45e-36	127.104
WBGene00022693		ZK250.10	5.08e-39	6.94229	4.22e-42	122.981
WBGene00012456		Y17D7C.2	1.48e-39	6.93411	1.14e-42	122.286
WBGene00012180		W01D2.3	1.62e-28	6.85515	2.11e-31	115.773
WBGene00002026	hsp-70	C12C8.1	1.58e-32	6.8263	1.59e-35	113.481
WBGene00007682		C18D11.6	6.2e-29	6.57623	7.36e-32	95.4208
WBGene00045238	rpr-1	Y48G10A.7	1.75e-25	6.48744	2.59e-28	89.7252
WBGene00011231		R11A5.3	1.89e-29	6.3058	2.13e-32	79.1108
WBGene00016637		C44B12.3	2.56e-23	5.92147	4.25e-26	60.6093
WBGene00045366		Y17D7C.3	9.08e-41	5.82757	5.93e-44	56.79
WBGene00007723		C25F9.2	3.66e-27	5.65353	4.99e-30	50.3365
WBGene00012620		Y38H6C.7	2.69e-18	5.47268	5.58e-21	44.4059
WBGene00019858		R03H10.6	2.04e-24	5.40914	3.14e-27	42.4926
WBGene00021101		W08F4.12	2.99e-17	5.40668	6.56e-20	42.4203
WBGene00219343		Y17D7C.9	4.83e-21	5.39471	9.46e-24	42.0697
WBGene00045300	fbxc-10	C44C8.9	1.22e-14	5.3527	2.98e-17	40.8624
WBGene00045301	fbxc-9	C44C8.10	1.22e-14	5.3527	2.98e-17	40.8624
WBGene00045299	fbxc-11	C44C8.8	1.22e-14	5.3527	2.98e-17	40.8624
WBGene00014454		MTCE.7	9.57e-29	5.32468	1.19e-31	40.0763
WBGene00044443		ZC21.10	2.08e-24	5.30426	3.33e-27	39.5132
WBGene00008944		F19B2.5	1.76e-32	5.08206	1.88e-35	33.873
WBGene00045412		C25F9.12	4.59e-14	4.99354	1.2e-16	31.857
WBGene00219916		F26D10.23	2.64e-12	4.99059	9.1e-15	31.792
WBGene00044083	tin-9.2	B0564.1	6.92e-12	4.94125	2.55e-14	30.723
WBGene00014472		MTCE.33	8.06e-26	4.93243	1.15e-28	30.5359
WBGene00012594	nspe-5	Y38E10A.16	2.1e-12	4.91073	7.11e-15	30.0799
WBGene00021601		Y46H3A.5	9.62e-13	4.87276	3.08e-15	29.2987
WBGene00197097		F13B9.9	4.85e-12	4.84575	1.75e-14	28.7552
WBGene00219601	linc-129	K11D9.9	4.98e-13	4.81882	1.53e-15	28.2233
WBGene00021478		Y39H10A.1	2.55e-10	4.67208	1.04e-12	25.4938
WBGene00011563	jmjd-4	T07C4.11	3.21e-10	4.65431	1.33e-12	25.1818
WBGene00006650	tts-1	F09E10.11	4.37e-21	4.64543	8.3e-24	25.0273
WBGene00009691		F44E5.4	3.32e-12	4.6383	1.16e-14	24.9039
WBGene00007699		C24H11.1	2.04e-09	4.51308	9.32e-12	22.8335
WBGene00194658		R09E10.13	1.65e-10	4.46873	6.66e-13	22.1423
WBGene00022951		C30E1.9	8.72e-19	4.43565	1.76e-21	21.6403
WBGene00045411		C25F9.11	1.06e-12	4.38229	3.47e-15	20.8546
WBGene00199016		W06H8.12	9.18e-09	4.38154	4.52e-11	20.8437
WBGene00008592		F08H9.4	9.84e-09	4.37117	5.08e-11	20.6944
WBGene00201125		F17A9.7	2.35e-09	4.36681	1.09e-11	20.632
WBGene00010752		K10G4.3	3.38e-14	4.32911	8.61e-17	20.0998
WBGene00197215		F57A8.9	1.98e-08	4.32089	1.09e-10	19.9857
WBGene00219614	linc-105	W09D10.6	9.56e-09	4.28787	4.76e-11	19.5334
WBGene00008405	ttll-12	D2013.9	1.56e-21	4.27809	2.78e-24	19.4014
WBGene00011737	sqst-1	T12G3.1	2.83e-23	4.26252	4.86e-26	19.1932
WBGene00000097	aip-1	F58E10.4	2.45e-21	4.25775	4.51e-24	19.1298
WBGene00044168		M05D6.10	3.65e-08	4.24838	2.12e-10	19.0059
WBGene00018522		F46H5.7	1.17e-08	4.22539	6.12e-11	18.7054
WBGene00219491		Y53F4B.62	9.74e-11	4.21178	3.75e-13	18.5299
WBGene00022382		Y94H6A.10	1.65e-14	4.19668	4.1e-17	18.337
WBGene00198634		T09F3.6	6.19e-08	4.19396	3.93e-10	18.3023
WBGene00005551	sri-39	F33H12.2	1.73e-07	4.10355	1.16e-09	17.1907
WBGene00004744	scp-1	D2013.8	2.91e-18	4.09697	6.21e-21	17.1125
WBGene00045372		W01D2.8	3.18e-07	4.03915	2.25e-09	16.4402
WBGene00201944		F54D5.22	3.71e-07	4.01717	2.73e-09	16.1915
WBGene00195341		F54D5.18	3.71e-07	4.01717	2.73e-09	16.1915
WBGene00006650	tts-1	F09E10.11	1.97e-13	4.01547	5.49e-16	16.1724
WBGene00013483	nhr-241	Y69H2.8	5.74e-07	4.00495	4.46e-09	16.055
WBGene00220172		Y49E10.36	2.16e-07	4.0032	1.5e-09	16.0355
WBGene00197604		K01G5.12	4.51e-07	3.99868	3.35e-09	15.9854
WBGene00022866		ZK1240.1	7.92e-08	3.998	5.16e-10	15.9778
WBGene00008850		F15B9.6	4.1e-12	3.99703	1.46e-14	15.9671
WBGene00199488		W06H8.13	5.13e-07	3.98387	3.9e-09	15.8221
WBGene00019668	fil-2	K12B6.3	2.24e-08	3.94226	1.26e-10	15.3723
WBGene00021979		Y58A7A.5	1.37e-12	3.94046	4.55e-15	15.3531
WBGene00195155		W04A8.9	1.23e-08	3.9239	6.48e-11	15.1779
WBGene00044900	cnc-11	R09B5.13	5.83e-07	3.86591	4.6e-09	14.58
WBGene00003961	pct-1	C07G1.3	1.98e-06	3.84148	1.75e-08	14.3351
WBGene00200098		Y71F9AL.20	1.1e-06	3.83838	9.33e-09	14.3043
WBGene00219327		ZK822.9	2.33e-06	3.82947	2.08e-08	14.2163
WBGene00018725	kreg-1	F53A9.2	1.29e-09	3.81494	5.81e-12	14.0738
WBGene00219672	anr-54	F08B1.7	2.85e-06	3.80201	2.63e-08	13.9483
WBGene00021577		Y46B2A.2	3.59e-06	3.79652	3.36e-08	13.8952
WBGene00002013	hsp-12.6	F38E11.2	7.46e-10	3.76693	3.23e-12	13.6131
WBGene00006169	str-118	F57A8.3	2.3e-06	3.75731	2.05e-08	13.5227
WBGene00007366		C06B3.7	2.07e-13	3.73688	5.9e-16	13.3325
WBGene00045298	fbxc-12	C44C8.7	7.92e-08	3.71896	5.17e-10	13.1679
WBGene00001875	his-1	T10C6.14	4.58e-07	3.69018	3.43e-09	12.9079
WBGene00201458		VF15C11L.2	7.46e-06	3.68443	7.52e-08	12.8565
WBGene00016115	mdt-26	C25H3.6	1.65e-10	3.65406	6.59e-13	12.5887
WBGene00011878	ador-1	T21B4.4	7.74e-10	3.64981	3.4e-12	12.5517
WBGene00001784	gst-36	R07B1.4	4.28e-15	3.64828	9.65e-18	12.5384
WBGene00236800	linc-171	C25A1.19	7.69e-06	3.6316	7.8e-08	12.3943
WBGene00020725	cnp-3	T23C6.3	5.68e-14	3.55635	1.52e-16	11.7644
WBGene00012813		Y43F8B.2	1.06e-09	3.54669	4.73e-12	11.6859
WBGene00220041		R11A5.8	1.52e-05	3.54561	1.7e-07	11.6771
WBGene00014814		R03D7.3	1.41e-10	3.52897	5.51e-13	11.5432
WBGene00017392	basl-2	F12A10.3	2.88e-05	3.52294	3.47e-07	11.495
WBGene00022381	ubxn-2	Y94H6A.9	2.88e-05	3.5124	3.49e-07	11.4113
WBGene00017270	numr-1	F08F8.5	6.42e-09	3.50691	3.12e-11	11.368
WBGene00020799		T25D10.1	5.94e-13	3.49589	1.87e-15	11.2815
WBGene00200308		C56C10.15	2.05e-05	3.45108	2.4e-07	10.9365
WBGene00044726		Y53F4B.43	2.64e-06	3.43488	2.39e-08	10.8144
WBGene00021862	fbxa-48	Y54F10BM.7	1.39e-05	3.4318	1.52e-07	10.7913
WBGene00009811		F47B8.10	1.04e-06	3.41641	8.77e-09	10.6768
WBGene00004236	ptr-22	Y80D3A.7	5.59e-07	3.41517	4.31e-09	10.6677
WBGene00012137	asic-2	T28F4.2	6.12e-08	3.40658	3.85e-10	10.6043
WBGene00220000		K02F2.11	1.94e-07	3.40518	1.32e-09	10.594
WBGene00014836		T09F5.12	2.35e-13	3.35135	6.9e-16	10.206
WBGene00007204	best-2	B0564.4	0.000106165	3.34003	1.46e-06	10.1263
WBGene00015694	ugt-27	C10H11.5	1.16e-05	3.33927	1.26e-07	10.1209
WBGene00008447		E01G4.5	9.84e-09	3.33627	5.03e-11	10.0999
WBGene00021978		Y58A7A.4	4.89e-06	3.30423	4.73e-08	9.87809
WBGene00008577		F08G2.5	3e-08	3.3009	1.71e-10	9.85531
WBGene00012101	zip-10	T27F2.4	4.07e-08	3.30017	2.49e-10	9.85032
WBGene00196687		C09B8.12	0.000114158	3.29003	1.59e-06	9.78133
WBGene00020596	oga-1	T20B5.3	2.64e-13	3.28529	7.97e-16	9.74926
WBGene00001879	his-5	F45F2.3	5.16e-06	3.26869	5.02e-08	9.63769
WBGene00044293		K08D12.7	0.000185373	3.26231	2.68e-06	9.59516
WBGene00022872		ZK1240.8	0.000114256	3.25186	1.6e-06	9.52594
WBGene00012444		Y15E3A.5	1.1e-11	3.25142	4.1e-14	9.52303
WBGene00006760	unc-23	H14N18.1	3.41e-09	3.24828	1.62e-11	9.50234
WBGene00002008	hsp-4	F43E2.8	2.35e-13	3.2213	6.97e-16	9.32625
WBGene00020834		T27A1.2	4.64e-07	3.20669	3.5e-09	9.23228
WBGene00050899		T10C6.15	7.79e-07	3.20292	6.51e-09	9.20821
WBGene00219681	anr-6	F25B4.17	0.000292492	3.19368	4.49e-06	9.14941
WBGene00017970		F32A5.4	1.81e-08	3.1821	9.86e-11	9.07628
WBGene00001912	his-38	K03A1.6	2.65e-06	3.17985	2.42e-08	9.06216
WBGene00021599	srt-42	Y46H3A.1	4.35e-05	3.17366	5.49e-07	9.02333
WBGene00198278		K03C7.9	0.000367671	3.15664	5.91e-06	8.9175
WBGene00016788		C49G7.10	3.55e-11	3.13509	1.35e-13	8.78527
WBGene00219700	linc-6	F52D2.13	9.92e-06	3.13322	1.04e-07	8.77394
WBGene00044772		T23E7.6	1.71e-06	3.11404	1.49e-08	8.65806
WBGene00194744		Y38H6C.25	0.000420621	3.10374	6.89e-06	8.59643
WBGene00000628	col-51	T28F2.8	0.000355879	3.09643	5.68e-06	8.55302
WBGene00021479	oac-55	Y39H10A.2	1.65e-05	3.08637	1.88e-07	8.49357
WBGene00018624		F48G7.13	2.24e-05	3.07526	2.66e-07	8.42844
WBGene00164985		ZK1010.10	1.73e-07	3.0748	1.17e-09	8.42572
WBGene00219709	linc-37	K02F3.14	0.000249906	3.06772	3.74e-06	8.38447
WBGene00219959		F52D2.14	1.13e-05	3.05833	1.21e-07	8.33009
WBGene00022529	srt-14	ZC142.2	0.000496147	3.04989	8.21e-06	8.28148
WBGene00002194	kin-6	ZK20.2	0.000726837	3.02505	1.3e-05	8.14014
WBGene00002021	hsp-17	F52E1.7	1.74e-08	3.01465	9.38e-11	8.08163
WBGene00201999		F54C8.11	0.000999228	2.99752	1.87e-05	7.98623
WBGene00016997	cebp-1	D1005.3	2.19e-08	2.98789	1.22e-10	7.93313
WBGene00045095	mrpr-1	E04F6.16	0.00105469	2.98583	1.98e-05	7.92181
WBGene00001915	his-41	C50F4.5	2.86e-07	2.97687	2e-09	7.87279
WBGene00017168		F01F1.14	5.34e-06	2.97124	5.22e-08	7.84208
WBGene00008602	oac-14	F09B9.1	6.6e-05	2.96484	8.62e-07	7.80741
WBGene00001749	gst-1	R107.7	3.38e-09	2.91238	1.58e-11	7.52858
WBGene00018028		F35B3.1	0.000999228	2.90823	1.87e-05	7.50698
WBGene00010876		M05D6.3	3.38e-05	2.90806	4.21e-07	7.50607
WBGene00004131	pqn-44	F55A12.9	4.49e-10	2.90777	1.92e-12	7.50458
WBGene00044644		B0205.13	4.06e-08	2.90299	2.45e-10	7.47973
WBGene00022887		ZK1290.5	5.96e-09	2.89815	2.86e-11	7.45471
WBGene00022951		C30E1.9	7.47e-08	2.89702	4.78e-10	7.44888
WBGene00017535	atf-8	F17A9.3	7.1e-05	2.88321	9.44e-07	7.3779
WBGene00006539	tbb-6	T04H1.9	1.49e-08	2.87523	7.98e-11	7.3372
WBGene00200893		F52D10.12	0.00206259	2.87262	4.16e-05	7.32392
WBGene00003616	nhr-17	C02B4.2	4.06e-08	2.86197	2.46e-10	7.27008
WBGene00005899	srx-8	C14C6.9	0.00235935	2.84827	4.87e-05	7.20135
WBGene00000391	cdd-1	C47D2.2	9.84e-09	2.84603	4.96e-11	7.19017
WBGene00013844	fbxa-50	ZC47.13	0.00194821	2.84126	3.91e-05	7.16648
WBGene00001756	gst-8	F11G11.1	0.00047972	2.83509	7.91e-06	7.13585
WBGene00044207		Y6G8.5	0.00265983	2.82538	5.65e-05	7.08798
WBGene00015175	srz-4	B0414.1	0.00201335	2.81966	4.05e-05	7.05994
WBGene00001892	his-18	K06C4.10	0.000355879	2.81767	5.64e-06	7.05024
WBGene00004567	rrn-2.1	F31C3.11	1.45e-05	2.81374	1.61e-07	7.03105
WBGene00019644	cpt-4	K11D12.4	2.48e-05	2.81158	2.95e-07	7.02054
WBGene00020318		T07F8.1	0.000106125	2.81109	1.45e-06	7.01816
WBGene00010877	lact-4	M05D6.4	1.41e-05	2.79586	1.55e-07	6.94447
WBGene00045457		F33H12.7	7.49e-05	2.77979	1e-06	6.86754
WBGene00020677		T22B11.3	2e-05	2.77194	2.3e-07	6.83026
WBGene00006611	tre-5	C23H3.7	2.78e-06	2.76956	2.56e-08	6.81902
WBGene00200459		F38H4.15	0.00249607	2.76332	5.27e-05	6.78958
WBGene00219941		F40F11.6	0.00336111	2.76202	7.54e-05	6.78348
WBGene00022549		ZC196.5	5.72e-08	2.75866	3.56e-10	6.76765
WBGene00017921		F29B9.5	5.53e-07	2.7562	4.23e-09	6.75613
WBGene00012604	nspe-2	Y38E10A.26	0.000940143	2.75306	1.73e-05	6.74146
WBGene00044743	crb-3	C35B8.4	3.31e-07	2.75091	2.4e-09	6.73139
WBGene00008497		F01D5.7	0.00027784	2.74656	4.25e-06	6.71116
WBGene00019782		M60.7	2.04e-05	2.73108	2.38e-07	6.63952
WBGene00196644		K08H10.15	0.00448231	2.7225	0.000105557	6.60014
WBGene00198213		M03F4.12	0.0039547	2.72243	9.1e-05	6.59984
WBGene00008496		F01D5.6	0.000686728	2.72188	1.21e-05	6.59733
WBGene00010470	cdr-4	K01D12.11	4.05e-06	2.7198	3.9e-08	6.58782
WBGene00008916	clec-221	F17C11.5	0.000521785	2.71957	8.67e-06	6.58676
WBGene00010177		F57A8.1	7.14e-07	2.71555	5.93e-09	6.56845
WBGene00021977		Y58A7A.3	1.28e-06	2.71485	1.1e-08	6.56525
WBGene00009451	cids-2	F36A2.1	0.00272011	2.70697	5.83e-05	6.52947
WBGene00010788	sulp-4	K12G11.1	6.67e-06	2.70477	6.61e-08	6.51955
WBGene00219449		Y38A10A.11	0.00478723	2.67894	0.000113305	6.40387
WBGene00018699		F52E1.12	0.000299245	2.67221	4.63e-06	6.37404
WBGene00010314		F59B2.12	0.00567817	2.67045	0.000139108	6.36629
WBGene00044514		R09E12.9	0.00377849	2.65452	8.61e-05	6.29638
WBGene00012600		Y38E10A.22	3.2e-07	2.64636	2.28e-09	6.26086
WBGene00023263		D1005.t1	3.2e-05	2.64115	3.93e-07	6.23827
WBGene00000549	cls-2	R107.6	3.67e-08	2.6369	2.16e-10	6.21996
WBGene00012140		T28F4.5	2.64e-06	2.63639	2.39e-08	6.21775
WBGene00003970	pek-1	F46C3.1	5e-08	2.62409	3.09e-10	6.16496
WBGene00013043	arrd-16	Y49E10.24	0.00214725	2.6154	4.36e-05	6.12794
WBGene00007303	rnh-1.3	C04F12.9	1.45e-06	2.61491	1.26e-08	6.12586
WBGene00005291	srh-70	T21B4.9	0.000615481	2.61237	1.05e-05	6.11509
WBGene00019564		K09D9.1	9.21e-06	2.60104	9.4e-08	6.06723
WBGene00005548	sri-36	F33H12.5	0.00833412	2.59551	0.00022049	6.04403
WBGene00015741		C13F10.1	0.00389723	2.59443	8.95e-05	6.03952
WBGene00000558	cnc-4	R09B5.9	0.000640274	2.58901	1.1e-05	6.01684
WBGene00010658		K08D8.4	9.62e-05	2.56971	1.31e-06	5.93692
WBGene00009589		F40F11.4	0.000845377	2.56839	1.53e-05	5.93147
WBGene00050912		F43E2.12	0.00828674	2.56587	0.000217262	5.92111
WBGene00200645		R03E9.9	0.00922669	2.5657	0.000250124	5.92043
WBGene00008972		F20C5.7	0.00991048	2.558	0.000271723	5.8889
WBGene00004169	pqn-89	Y73B6BR.1	6.25e-06	2.54364	6.16e-08	5.83057
WBGene00009102		F25B3.5	5.83e-05	2.54168	7.48e-07	5.82265
WBGene00009957		F53B2.8	2.04e-05	2.53152	2.38e-07	5.78179
WBGene00219697	linc-169	F43E2.13	0.00150011	2.5228	2.92e-05	5.74697
WBGene00016250	hsp-110	C30C11.4	1.28e-07	2.51953	8.5e-10	5.73397
WBGene00008922		F17C11.11	6.48e-07	2.50622	5.23e-09	5.68129
WBGene00199137		B0547.34	0.000253696	2.49561	3.84e-06	5.63968
WBGene00018724		F53A9.1	2.99e-05	2.49228	3.63e-07	5.62666
WBGene00001534	gcy-7	F52E1.4	0.00345346	2.48914	7.76e-05	5.61443
WBGene00006684	twk-32	F53C11.6	0.000294493	2.48677	4.54e-06	5.60521
WBGene00197520		C05C8.10	0.00954037	2.47929	0.000260326	5.57622
WBGene00005191	srg-34	Y51A2D.12	0.00809524	2.47133	0.000209848	5.54556
WBGene00001633	gly-8	Y66A7A.6	0.000686728	2.46901	1.21e-05	5.53665
WBGene00194957		Y116A8C.465	0.0150718	2.46292	0.000454175	5.51333
WBGene00006779	unc-43	K11E8.1	0.00493482	2.46136	0.000117384	5.50735
WBGene00000617	col-40	T13B5.4	0.00502014	2.44712	0.000120009	5.45325
WBGene00045272		F59C12.4	0.000322235	2.44358	5.05e-06	5.43991
WBGene00012195	bath-34	W02A11.5	0.000777926	2.43825	1.4e-05	5.41983
WBGene00009534		F38B7.3	6.8e-07	2.43595	5.53e-09	5.41122
WBGene00001876	his-2	T10C6.13	0.00907063	2.42863	0.000243742	5.38381
WBGene00016783	irg-2	C49G7.5	0.000114158	2.422	1.59e-06	5.35913
WBGene00023314		H31G24.2	0.0124081	2.42178	0.000361321	5.35832
WBGene00014181		ZK1010.8	0.000697005	2.42008	1.24e-05	5.35199
WBGene00010700	nipi-3	K09A9.1	3.2e-07	2.41391	2.3e-09	5.32915
WBGene00016508		C37H5.5	5.97e-07	2.40429	4.78e-09	5.29375
WBGene00012607		Y38F1A.4	0.000640274	2.40069	1.1e-05	5.28055
WBGene00199132		C37H5.15	0.019879	2.3957	0.000643845	5.26232
WBGene00019072	fbxc-8	F58H7.7	0.00027784	2.39544	4.25e-06	5.26139
WBGene00009972	oac-33	F53C11.2	0.00323124	2.38977	7.21e-05	5.24072
WBGene00001398	fat-6	VZK822L.1	0.000154405	2.3891	2.21e-06	5.23831
WBGene00019233	ugt-14	H23N18.2	0.00496139	2.38901	0.000118311	5.23796
WBGene00021892		Y54G2A.28	0.0099661	2.37003	0.000274307	5.16953
WBGene00011557	ostf-4	T07A5.4	0.0187065	2.36796	0.000592554	5.1621
WBGene00197454		T04H1.11	0.0224731	2.36604	0.000754524	5.15523
WBGene00007757		C27A7.6	0.0220907	2.36441	0.000737753	5.14942
WBGene00015056		B0222.5	1.98e-06	2.36206	1.73e-08	5.14104
WBGene00044462		C44B12.9	0.0179511	2.35697	0.000562237	5.12292
WBGene00019468		K07B1.8	0.00242172	2.35332	5.1e-05	5.10998
WBGene00019529		K08D10.5	0.0113925	2.34957	0.000323704	5.09672
WBGene00016265	nmur-4	C30F12.6	3.19e-05	2.34167	3.89e-07	5.06889
WBGene00012468		Y17G7B.17	1.13e-06	2.33864	9.69e-09	5.05826
WBGene00017563		F18C5.10	3.62e-06	2.33832	3.44e-08	5.05713
WBGene00001542	gcy-17	W03F11.2	0.0156218	2.3367	0.00047538	5.05145
WBGene00044495		Y54G2A.40	0.00115628	2.32956	2.19e-05	5.02651
WBGene00206465		F57A8.10	0.00230332	2.32175	4.73e-05	4.99938
WBGene00023345		T12B5.9	0.0105888	2.31654	0.000295215	4.98137
WBGene00016845		C50F7.5	0.00793726	2.31588	0.000205282	4.97907
WBGene00000904	daf-8	R05D11.1	1.47e-05	2.31478	1.64e-07	4.97528
WBGene00003695	nhr-105	C06G3.1	1.02e-05	2.30823	1.07e-07	4.95275
WBGene00018809		F54D10.8	0.0178722	2.30501	0.000558705	4.94171
WBGene00006624	try-6	F48A9.3	0.000432682	2.30258	7.11e-06	4.93338
WBGene00009154		F26D2.16	0.0288547	2.30145	0.00102102	4.92953
WBGene00018591	npax-2	F48B9.5	0.0184103	2.2881	0.000579128	4.88413
WBGene00016907		C53H9.2	6.97e-05	2.284	9.22e-07	4.87027
WBGene00001886	his-12	ZK131.6	0.00830305	2.28156	0.000218683	4.86204
WBGene00001917	his-43	F08G2.2	0.00830305	2.28156	0.000218683	4.86204
WBGene00002232	kpc-1	F11A6.1	6.54e-05	2.27116	8.5e-07	4.82712
WBGene00001425	fis-2	F13B9.8	6.79e-06	2.26948	6.77e-08	4.82149
WBGene00000915	daf-21	C47E8.5	3.76e-06	2.26797	3.59e-08	4.81645
WBGene00003674	nhr-84	T06C12.7	1.07e-05	2.267	1.13e-07	4.81321
WBGene00219603	anr-57	R13.10	0.0345235	2.25956	0.00126151	4.78846
WBGene00012980	efhd-1	Y48B6A.6	6.31e-05	2.25658	8.16e-07	4.77858
WBGene00199485		M117.11	0.0347524	2.25562	0.00127576	4.77539
WBGene00014963		Y105C5A.21	0.0197975	2.25517	0.000636506	4.7739
WBGene00006863	gyg-1	F56B6.4	5.35e-05	2.25439	6.82e-07	4.77133
WBGene00018804		F54D10.3	0.000416585	2.24732	6.8e-06	4.748
WBGene00021044		W05H7.1	6.61e-05	2.24531	8.66e-07	4.74139
WBGene00045388	lfor-1	C38C6.8	0.0364567	2.24318	0.00134945	4.7344
WBGene00009963	fipr-26	F53B6.8	0.0320235	2.23938	0.00115306	4.72195
WBGene00006602	tps-1	ZK54.2	1.52e-05	2.23743	1.72e-07	4.71557
WBGene00005797	srw-50	M01B2.5	0.0382738	2.23009	0.00145076	4.69162
WBGene00219886		F09E10.15	0.000649158	2.22938	1.12e-05	4.68933
WBGene00219716	linc-88	M02D8.11	0.0387167	2.22601	0.00147674	4.67837
WBGene00012107		T27F6.8	0.00407573	2.22292	9.43e-05	4.66837
WBGene00202400		C27D6.14	0.0347346	2.22148	0.00127128	4.66372
WBGene00016834	sre-50	C50E10.11	0.0366867	2.22041	0.00136449	4.66026
WBGene00017834		F26F12.3	2.04e-05	2.21723	2.37e-07	4.64998
WBGene00004987	spp-2	T08A9.12	0.000226202	2.20218	3.35e-06	4.60173
WBGene00000659	col-84	K12D12.3	0.0202631	2.19657	0.00065989	4.58388
WBGene00014089		ZK822.1	0.00242172	2.19362	5.1e-05	4.57452
WBGene00013244		Y56A3A.33	0.00272011	2.19332	5.84e-05	4.57356
WBGene00220243		ZK484.11	0.0411389	2.19272	0.00159841	4.57167
WBGene00004677	rrn-3.56	F31C3.10	4.31e-05	2.19155	5.42e-07	4.56795
WBGene00022713		ZK355.3	0.0463141	2.18584	0.00185168	4.54991
WBGene00220073		T19E7.29	0.0477161	2.17971	0.00191623	4.53063
WBGene00019393	irld-45	K04F1.14	0.0472197	2.17965	0.00189349	4.53044
WBGene00044799		ZK686.6	0.0111067	2.17813	0.00031229	4.52567
WBGene00044410		F48E8.8	0.0010746	2.17342	2.02e-05	4.51091
WBGene00001532	gcy-5	ZK970.6	0.0314681	2.17019	0.00112746	4.50082
WBGene00000973	dhs-9	Y32H12A.3	1.52e-05	2.16888	1.71e-07	4.49674
WBGene00010244		F58D5.5	3.51e-05	2.16659	4.39e-07	4.48961
WBGene00018259		F41B4.3	0.000249906	2.16339	3.75e-06	4.47967
WBGene00022156		Y71G12B.18	0.0404821	2.16104	0.00156328	4.47238
WBGene00016739	pitr-1	C48A7.2	0.00918363	2.15921	0.000247628	4.4667
WBGene00001237	elc-2	W03H1.2	0.0504495	2.15638	0.00205593	4.45796
WBGene00021382		Y37F4.1	0.00825629	2.15202	0.000215492	4.44449
WBGene00009729		F45E10.2	0.000149046	2.14284	2.11e-06	4.41631
WBGene00001031	dnj-13	F54D5.8	1.18e-05	2.13886	1.28e-07	4.40414
WBGene00012961		Y47H10A.5	0.0255936	2.13741	0.000877719	4.39972
WBGene00020999		W03F9.1	0.00011238	2.13617	1.55e-06	4.39595
WBGene00012273		W05B2.7	0.0144458	2.1323	0.000430171	4.38415
WBGene00013079	ttr-26	Y51A2D.11	0.00186987	2.12811	3.72e-05	4.37146
WBGene00021476	nsun-4	Y39G10AR.21	0.00812454	2.12625	0.00021109	4.36582
WBGene00001768	gst-20	Y48E1B.10	0.000395116	2.12595	6.42e-06	4.36491
WBGene00020912		W01A11.7	0.0102726	2.12383	0.000284571	4.35848
WBGene00018069		F35H10.3	0.00422395	2.12015	9.8e-05	4.34738
WBGene00009947		F52H3.5	0.00137863	2.11418	2.67e-05	4.32945
WBGene00012724	sre-48	Y39G8B.3	0.060076	2.1097	0.00250881	4.31603
WBGene00013170		Y53F4B.24	0.00893935	2.10912	0.000239153	4.31429
WBGene00200561		C10C6.11	0.0661657	2.09661	0.00284162	4.27703
WBGene00009180	nurf-1	F26H11.2	3.2e-05	2.09422	3.94e-07	4.26995
WBGene00197534		F38H4.13	0.0681161	2.08633	0.0029577	4.24666
WBGene00194925		K08D8.11	0.00922121	2.08339	0.000249429	4.238
WBGene00010260	ddx-17	F58E10.3	0.00055228	2.07957	9.21e-06	4.22681
WBGene00014731		F02E9.8	0.0146588	2.07883	0.000437382	4.22465
WBGene00020295	pqbp-1.2	T07A9.1	0.0685053	2.07044	0.00298273	4.20015
WBGene00013636		Y105C5A.12	0.0224362	2.06321	0.000751954	4.17915
WBGene00008319		C54G10.1	0.0756585	2.05229	0.00344562	4.14765
WBGene00044724		R02E4.3	0.0409148	2.05077	0.00158727	4.14327
WBGene00011714		T11F9.13	0.0728406	2.04943	0.00326479	4.13944
WBGene00196854		CD4.13	0.0738477	2.04535	0.00332808	4.12773
WBGene00018647		F49F1.7	0.0084038	2.03984	0.00022333	4.11201
WBGene00017462		F14D2.14	0.000653167	2.03038	1.14e-05	4.08513
WBGene00045308		C37H5.14	0.00212496	2.02702	4.3e-05	4.07563
WBGene00000211	asm-1	B0252.2	0.000195441	2.0234	2.84e-06	4.06542
WBGene00005242	srh-17	C47E8.2	0.086572	2.01349	0.00414392	4.03758
WBGene00007632		C16C10.13	0.0249957	2.01232	0.000854047	4.03431
WBGene00002263	lea-1	K08H10.1	8.41e-05	2.01039	1.13e-06	4.02891
WBGene00021911		Y55B1BR.1	0.086572	2.01023	0.00414424	4.02846
WBGene00220030		M03F4.13	0.083022	2.00735	0.00391028	4.02043
WBGene00018182		F38E1.10	0.0871547	2.00636	0.00419135	4.01766
WBGene00003589	nex-2	T07C4.9	0.00119029	2.00436	2.27e-05	4.0121
WBGene00219659	anr-36	C37C3.15	0.0376805	2.00387	0.00142333	4.01074
WBGene00016649	fbxc-1	C44C8.4	0.00236031	2.0034	4.91e-05	4.00942
WBGene00016646	fbxc-5	C44C8.1	0.00236031	2.0034	4.91e-05	4.00942
WBGene00013196	tbc-20	Y54E2A.12	0.00096493	2.00321	1.79e-05	4.00892
WBGene00001554	gcy-34	M04G12.3	0.0728406	1.99555	0.00325944	3.98769
WBGene00004513	rrn-1.2	F31C3.8	0.00059126	1.99523	1e-05	3.98679
WBGene00004512	rrn-1.1	F31C3.7	0.00059126	1.99523	1e-05	3.98679
WBGene00017420		F13B9.2	0.0445831	1.99361	0.0017719	3.98231
WBGene00017465		F14F9.2	0.0865621	1.99353	0.00412836	3.98211
WBGene00019466	tos-1	K07B1.6	0.000905771	1.99185	1.65e-05	3.97746
WBGene00020587	ugt-9	T19H12.1	0.00523851	1.98528	0.000126473	3.95939
WBGene00021865	fbxa-66	Y54F10BM.11	0.0860383	1.98445	0.00408425	3.95711
WBGene00009801	ipla-2	F47A4.5	0.000237466	1.98323	3.54e-06	3.95377
WBGene00016763		C49A9.9	0.000709238	1.982	1.26e-05	3.95042
WBGene00200347		T28B11.18	0.0913344	1.97634	0.00444807	3.93493
WBGene00007365		C06B3.6	0.000579577	1.97573	9.73e-06	3.93327
WBGene00012216		W02D9.10	0.00557893	1.97352	0.000136346	3.92725
WBGene00019664		K11H12.8	8.41e-05	1.96458	1.13e-06	3.903
WBGene00010874		M05D6.1	0.0220907	1.96317	0.000735431	3.89918
WBGene00003954	pcm-1	C10F3.5	0.000365493	1.96266	5.85e-06	3.89779
WBGene00005748	srw-1	Y75B12B.7	0.09538	1.96219	0.00471864	3.89652
WBGene00001493	frm-7	C51F7.1	0.000150161	1.95928	2.14e-06	3.88869
WBGene00005833	srw-86	C25F9.7	0.10792	1.94615	0.00555668	3.85344
WBGene00009405		F35C11.6	0.00348965	1.9438	7.87e-05	3.84718
WBGene00219772	anr-53	Y119D3A.6	0.101057	1.94296	0.00509626	3.84493
WBGene00014793		H40L08.2	0.0097946	1.9411	0.000267844	3.83999
WBGene00004509	rrf-2	M01G12.12	0.00096493	1.93885	1.78e-05	3.83399
WBGene00013559		Y75B8A.28	0.0113012	1.93845	0.000319099	3.83294
WBGene00020585	clec-178	T19E7.1	0.0288547	1.93617	0.00102184	3.82689
WBGene00021283		Y24D9A.5	0.110645	1.93286	0.00577577	3.81812
WBGene00001909	his-35	C50F4.13	0.00096493	1.93162	1.79e-05	3.81484
WBGene00001881	his-7	F45F2.4	0.0489704	1.92873	0.00197532	3.8072
WBGene00008620		F09C6.10	0.107709	1.92161	0.00553945	3.78847
WBGene00021837		Y54E10BL.1	0.11754	1.92085	0.0062542	3.78647
WBGene00017390		F12A10.1	0.00295356	1.91955	6.45e-05	3.78305
WBGene00010531		K03D3.5	0.109825	1.91576	0.00569385	3.77312
WBGene00008880		F16B12.4	0.002202	1.91287	4.51e-05	3.76556
WBGene00016648	fbxc-2	C44C8.3	0.00319501	1.90242	7.11e-05	3.73839
WBGene00019073	fbxc-3	F58H7.8	0.00319501	1.90242	7.11e-05	3.73839
WBGene00016647	fbxc-4	C44C8.2	0.00319501	1.90242	7.11e-05	3.73839
WBGene00201111		C36E8.10	0.118401	1.88949	0.00632812	3.70503
WBGene00022479	fbxa-36	Y119D3A.4	0.0925067	1.88909	0.00452711	3.70403
WBGene00220169		Y48B6A.25	0.091611	1.8879	0.00447241	3.70097
WBGene00014793		H40L08.2	0.0121267	1.88476	0.00035104	3.69291
WBGene00020179		T02H6.9	0.125137	1.88048	0.00689193	3.68198
WBGene00195453		T04C12.15	0.12141	1.87936	0.00657754	3.67913
WBGene00200931		W07G4.11	0.12141	1.87934	0.00658254	3.67907
WBGene00077684		Y26D4A.21	0.0703936	1.87672	0.00309418	3.67239
WBGene00006578	tli-1	F25H2.1	0.00168442	1.87403	3.33e-05	3.66555
WBGene00012603	nspe-6	Y38E10A.25	0.11754	1.87062	0.00624486	3.6569
WBGene00001889	his-15	ZK131.9	0.072828	1.87015	0.00325302	3.65571
WBGene00001918	his-44	F08G2.1	0.072828	1.87015	0.00325302	3.65571
WBGene00044306		F58F9.8	0.125137	1.86743	0.00688209	3.64882
WBGene00000613	col-36	C27H5.5	0.134368	1.86559	0.00768944	3.64418
WBGene00021244		Y22D7AL.4	0.0705567	1.86183	0.00310694	3.63468
WBGene00010585		K05C4.9	0.0061396	1.85519	0.000152102	3.61799
WBGene00021526		Y41G9A.2	0.0945479	1.85457	0.00464547	3.61644
WBGene00022478	fbxa-35	Y119D3A.3	0.0790322	1.85178	0.00368486	3.60946
WBGene00006923	vhp-1	F08B1.1	0.000579577	1.84784	9.73e-06	3.5996
WBGene00019450		K06H6.2	0.138939	1.84743	0.00813458	3.5986
WBGene00195363		M01H9.6	0.131529	1.84726	0.00746668	3.59817
WBGene00001884	his-10	ZK131.4	0.076327	1.8466	0.00353156	3.59652
WBGene00001888	his-14	ZK131.8	0.076327	1.8466	0.00353156	3.59652
WBGene00001900	his-26	ZK131.1	0.076327	1.8466	0.00353156	3.59652
WBGene00236798		F48C1.15	0.147137	1.8393	0.0087891	3.57837
WBGene00011254		R12G8.1	0.111306	1.83705	0.00581687	3.57278
WBGene00044034		Y38E10A.28	0.0738477	1.83682	0.00332162	3.57221
WBGene00015517		C06A8.8	0.0106297	1.83374	0.000297618	3.56461
WBGene00001311	end-3	F58E10.5	0.121656	1.83027	0.00660313	3.55604
WBGene00017692		F22B7.1	0.0347524	1.83011	0.00127606	3.55564
WBGene00003473	mtl-1	K11G9.6	0.122772	1.82656	0.00670736	3.5469
WBGene00010977		R02D5.3	0.0211644	1.82131	0.00069552	3.53403
WBGene00194713		F19B10.13	0.075939	1.81871	0.00347757	3.52767
WBGene00002269	lec-6	Y55B1AR.1	0.000355879	1.81676	5.66e-06	3.52289
WBGene00008591		F08H9.3	0.152085	1.8101	0.00926669	3.50668
WBGene00196606		Y15E3A.7	0.14658	1.80627	0.00873772	3.49737
WBGene00018648		F49F1.8	0.144389	1.80451	0.00855643	3.4931
WBGene00003515	myo-3	K12F2.1	0.00432708	1.79867	0.000100618	3.47898
WBGene00008306		C54E10.1	0.160451	1.79641	0.0100222	3.47356
WBGene00007460		C08F11.13	0.00683943	1.79494	0.000173238	3.47001
WBGene00008615		F09C6.1	0.158399	1.79184	0.0097907	3.46257
WBGene00219587	anr-16	F29G6.5	0.157729	1.7907	0.00973996	3.45982
WBGene00010057		F54D5.15	0.0113343	1.78913	0.000321378	3.45606
WBGene00015048	faah-2	B0218.2	0.00323343	1.78412	7.23e-05	3.44408
WBGene00007097		B0024.4	0.118627	1.7816	0.00637539	3.43807
WBGene00045242		C05B5.11	0.155756	1.78099	0.00958116	3.43662
WBGene00202434		K03C7.15	0.172275	1.78048	0.0110469	3.43541
WBGene00004153	pqn-71	T23F1.6	0.0995261	1.7791	0.0049828	3.43212
WBGene00044180		C47E8.11	0.0894208	1.77542	0.00432628	3.42338
WBGene00009205		F28C6.5	0.0759786	1.77252	0.0034884	3.41651
WBGene00014005		ZK593.9	0.118806	1.77035	0.00640467	3.41137
WBGene00012593	nspe-7	Y38E10A.15	0.110312	1.76857	0.00574831	3.40716
WBGene00017163	dnpp-1	F01F1.9	0.000686728	1.76792	1.21e-05	3.40563
WBGene00219683	anr-32	F29G9.18	0.122003	1.76652	0.00663643	3.40232
WBGene00001887	his-13	ZK131.7	0.0634641	1.76345	0.00269171	3.3951
WBGene00001883	his-9	ZK131.3	0.0634641	1.76345	0.00269171	3.3951
WBGene00022631	nekl-2	ZC581.1	0.0190667	1.76296	0.000605093	3.39394
WBGene00010530	srz-61	K03D3.4	0.166509	1.758	0.0104698	3.3823
WBGene00016991		CD4.5	0.186068	1.75715	0.0123177	3.38029
WBGene00019490		K07E3.1	0.00188557	1.75539	3.77e-05	3.37617
WBGene00005427	srh-217	Y113G7B.2	0.180968	1.74995	0.011862	3.36348
WBGene00005922	srx-31	F41H8.4	0.17273	1.74007	0.0111171	3.34051
WBGene00219592	linc-84	F55H12.8	0.143703	1.73872	0.00846465	3.33739
WBGene00012180		W01D2.3	0.0161072	1.73376	0.000493755	3.32594
WBGene00001924	his-50	F07B7.9	0.200375	1.73061	0.0136927	3.31867
WBGene00001902	his-28	K06C4.2	0.200375	1.73061	0.0136927	3.31867
WBGene00000191	arl-7	F20D1.5	0.05758	1.72932	0.00239091	3.31572
WBGene00008988		F20G2.5	0.187673	1.72845	0.0124908	3.31371
WBGene00017908		F28H1.1	0.0105907	1.72435	0.000295896	3.3043
WBGene00220208		Y75B12B.16	0.205302	1.72362	0.0141512	3.30264
WBGene00008545		F07A11.1	0.11465	1.72255	0.00604603	3.30018
WBGene00019280		K01A2.5	0.0279075	1.72112	0.000980025	3.29693
WBGene00199899		F53G12.16	0.182517	1.72015	0.0120285	3.2947
WBGene00219674	linc-122	F10C1.21	0.184714	1.71634	0.0121915	3.28601
WBGene00219298		F55H2.8	0.207875	1.71022	0.0144712	3.27211
WBGene00014196		ZK1053.1	0.207476	1.70329	0.0143995	3.25644
WBGene00022020	hpo-39	Y61A9LA.9	0.169764	1.69991	0.0107911	3.24881
WBGene00019890		R05F9.6	0.0021763	1.6999	4.44e-05	3.24879
WBGene00196428		Y37E3.27	0.192896	1.69906	0.0129643	3.24689
WBGene00013387		Y62F5A.9	0.13082	1.69836	0.00740317	3.24533
WBGene00019331	dos-3	K02F3.8	0.217495	1.69722	0.0155464	3.24275
WBGene00197119		F36D4.9	0.208139	1.69705	0.0145196	3.24238
WBGene00007216		C01A2.4	0.00721351	1.6969	0.000184852	3.24203
WBGene00005368	srh-152	K08G2.3	0.208376	1.694	0.0145785	3.23552
WBGene00011736		T12D8.9	0.00379177	1.69053	8.66e-05	3.22775
WBGene00008572		F08B12.4	0.0128746	1.69029	0.000377481	3.22721
WBGene00010911		M106.3	0.00446986	1.68842	0.000104998	3.22305
WBGene00000583	cof-2	C48E7.5	0.137108	1.68822	0.00797047	3.22258
WBGene00000244	bbs-8	T25F10.5	0.107709	1.6803	0.00553819	3.20494
WBGene00194742		F37C12.21	0.14658	1.67814	0.00873843	3.20014
WBGene00198728		W04D2.10	0.226576	1.6767	0.0166525	3.19697
WBGene00004933	sod-4	F55H2.1	0.00773595	1.6753	0.000199158	3.19386
WBGene00023483		Y75B8A.39	0.214455	1.67227	0.0152401	3.18716
WBGene00017681	slc-17.5	F21F8.11	0.00502524	1.66795	0.000120727	3.17763
WBGene00201075		F25D7.9	0.222523	1.66684	0.0162021	3.17519
WBGene00020455	fbxa-59	T12B5.8	0.00712566	1.6663	0.000182178	3.17399
WBGene00044587	srz-105	K03D3.12	0.222492	1.66598	0.0161741	3.17329
WBGene00021691		Y48G8AL.13	0.00186987	1.66349	3.73e-05	3.16783
WBGene00023425	try-9	B0286.6	0.191617	1.66303	0.0128328	3.16681
WBGene00000841	cul-6	K08E7.7	0.10101	1.65761	0.00507508	3.15492
WBGene00021285		Y24D9A.7	0.238998	1.65468	0.0180935	3.14853
WBGene00011105		R07E3.4	0.0120956	1.65116	0.000348581	3.14086
WBGene00019057		F58F9.3	0.0376309	1.65043	0.00141532	3.13926
WBGene00012552	enu-3.5	Y37D8A.12	0.00542749	1.65026	0.000132001	3.13891
WBGene00000236	bag-1	F57B10.11	0.0120334	1.6486	0.000345485	3.13529
WBGene00219676	linc-48	F11C7.10	0.23827	1.64794	0.0179702	3.13385
WBGene00201513		ZK1290.22	0.217495	1.64787	0.0155364	3.13371
WBGene00005344	srh-127	F37B4.1	0.23302	1.64714	0.0173472	3.13213
WBGene00022578		ZC262.1	0.247167	1.64627	0.0190016	3.13024
WBGene00044301	lgc-28	D2062.12	0.135653	1.64609	0.00783758	3.12983
WBGene00011957		T23F11.6	0.153092	1.64555	0.0093537	3.12866
WBGene00020237	phat-4	T05B4.3	0.0630563	1.6442	0.00264823	3.12574
WBGene00001160	efk-1	F42A10.4	0.00487771	1.64292	0.000115736	3.12298
WBGene00001397	fat-5	W06D12.3	0.0239312	1.64275	0.000811999	3.12262
WBGene00013843	fbxa-49	ZC47.12	0.245913	1.64254	0.018876	3.12216
WBGene00017979		F32B5.6	0.0756585	1.63689	0.00344419	3.10995
WBGene00013171		Y53F4B.25	0.147812	1.63661	0.00885572	3.10933
WBGene00019243	fbxb-72	H24O09.2	0.214833	1.63323	0.0152797	3.10207
WBGene00219976		F55H12.9	0.254396	1.63147	0.020007	3.09828
WBGene00195725		F48B9.9	0.224672	1.63102	0.0164992	3.09732
WBGene00201212		K02A4.11	0.224672	1.63102	0.0164992	3.09732
WBGene00004157	pqn-75	W03D2.1	0.133598	1.62579	0.00762376	3.08611
WBGene00012671		Y39B6A.9	0.182487	1.62432	0.0119947	3.08296
WBGene00219615	linc-109	W09D10.7	0.0320328	1.62329	0.00115529	3.08077
WBGene00005517	sri-5	F28D9.2	0.219698	1.62076	0.0157818	3.07538
WBGene00023313		H28G03.5	0.0569377	1.62074	0.00235749	3.07533
WBGene00020262	ferl-1	T05E8.1	0.200753	1.61851	0.0137305	3.07058
WBGene00008433	2021-03-02	D2089.2	0.127138	1.61768	0.00711161	3.06882
WBGene00008144	gasr-8	C47E8.6	0.23099	1.6169	0.0171314	3.06714
WBGene00198042		T28F4.7	0.250336	1.61361	0.0194562	3.06016
WBGene00017385		F11G11.5	0.00502524	1.61326	0.00012047	3.05941
WBGene00006448	glod-4	C16C10.10	0.0124081	1.61306	0.000361392	3.05901
WBGene00011076	scav-5	R07B1.3	0.0264762	1.61162	0.000912485	3.05594
WBGene00011772		T14G8.4	0.134927	1.61149	0.00775132	3.05568
WBGene00001914	his-40	K03A1.1	0.125509	1.61087	0.00695368	3.05435
WBGene00001935	his-61	F55G1.10	0.0434509	1.60931	0.00171643	3.05106
WBGene00006789	unc-54	F11C3.3	0.00991048	1.60741	0.000272189	3.04703
WBGene00017361		F10E9.12	0.0374179	1.60073	0.00140067	3.03297
WBGene00000188	arl-3	F19H8.3	0.118313	1.60028	0.00631639	3.03202
WBGene00014871		Y37H9A.5	0.0500178	1.59942	0.00203537	3.03021
WBGene00010481		K01G5.10	0.0159391	1.59917	0.000485983	3.02968
WBGene00007908		C34B4.3	0.0895656	1.59556	0.00434067	3.02213
WBGene00200577		Y65B4BL.12	0.260683	1.59319	0.020752	3.01715
WBGene00008975		F20D1.3	0.00755041	1.58912	0.000193933	3.00866
WBGene00008777		F13H10.6	0.0677382	1.5887	0.00293326	3.00778
WBGene00009156	clec-196	F26D10.12	0.238998	1.58796	0.0180955	3.00623
WBGene00199051		R03E9.7	0.24972	1.58405	0.0193756	2.99811
WBGene00195807		F56H11.8	0.24972	1.58405	0.0193756	2.99811
WBGene00001880	his-6	F45F2.13	0.118806	1.58326	0.0064132	2.99646
WBGene00017583		F19B10.1	0.0420425	1.58274	0.00164197	2.99539
WBGene00220201		Y73B3A.30	0.271477	1.58157	0.021885	2.99295
WBGene00012591	nspe-1	Y38E10A.13	0.0356254	1.58074	0.00131656	2.99124
WBGene00008735		F13D2.1	0.0143699	1.57971	0.000426203	2.98909
WBGene00020315		T07E3.4	0.0539241	1.57969	0.00221991	2.98905
WBGene00013829		Y116F11B.14	0.280299	1.57868	0.0229453	2.98697
WBGene00018385		F43C11.8	0.282743	1.57709	0.023397	2.98367
WBGene00220028		M03A8.6	0.276946	1.57285	0.022523	2.97493
WBGene00016041		C24A11.2	0.279508	1.57082	0.022861	2.97073
WBGene00012139		T28F4.4	0.0143746	1.57061	0.000427196	2.9703
WBGene00008777		F13H10.6	0.0367866	1.56933	0.00137039	2.96768
WBGene00023401		ZK380.t2	0.0962946	1.56585	0.00477532	2.96051
WBGene00001755	gst-7	F11G11.2	0.0321126	1.56359	0.00116008	2.95588
WBGene00022746		ZK470.4	0.297961	1.5621	0.0252153	2.95284
WBGene00009101		F25B3.4	0.0945656	1.56191	0.00466153	2.95244
WBGene00016961	vps-32.1	C56C10.3	0.00691853	1.5602	0.000176062	2.94895
WBGene00011830	cyp-29A2	T19B10.1	0.019295	1.55877	0.000613486	2.94602
WBGene00017659		F21C10.10	0.0197975	1.55616	0.000635583	2.94069
WBGene00018803	fbxa-24	F54D10.2	0.101057	1.55598	0.00509682	2.94034
WBGene00021876		Y54G2A.11	0.110102	1.5554	0.00572084	2.93916
WBGene00007393	fbxa-157	C06H5.2	0.275028	1.55521	0.0222984	2.93877
WBGene00004622	rrn-3.1	F31C3.9	0.01132	1.55485	0.0003203	2.93803
WBGene00007631	wht-3	C16C10.12	0.174851	1.54827	0.0113262	2.92467
WBGene00195737		Y82E9BR.27	0.312577	1.54731	0.0273491	2.92272
WBGene00001893	his-19	K06C4.11	0.222036	1.54637	0.0161029	2.92082
WBGene00001925	his-51	F07B7.10	0.222036	1.54637	0.0161029	2.92082
WBGene00001927	his-53	F07B7.3	0.222036	1.54637	0.0161029	2.92082
WBGene00001895	his-21	K06C4.3	0.222036	1.54637	0.0161029	2.92082
WBGene00018145		F37C4.5	0.00828674	1.54548	0.00021727	2.91902
WBGene00016417		C34F11.8	0.0259626	1.54507	0.000893244	2.91819
WBGene00008932		F18A11.5	0.0721593	1.54134	0.00320603	2.91064
WBGene00206525		R74.10	0.173258	1.53731	0.0111716	2.90253
WBGene00003543	nas-24	F20G2.4	0.316505	1.53685	0.0280307	2.90161
WBGene00009241		F28H7.8	0.0499034	1.53418	0.00202775	2.89624
WBGene00010019		F54B8.4	0.131529	1.53365	0.00746447	2.89518
WBGene00013499		Y70G10A.3	0.0282801	1.53291	0.000996465	2.89368
WBGene00020945	clec-219	W02D7.10	0.278873	1.53164	0.0227481	2.89115
WBGene00012158	ucr-2.1	VW06B3R.1	0.0194887	1.52856	0.0006208	2.88498
WBGene00020271		T05H4.8	0.32089	1.52682	0.0285871	2.88149
WBGene00197238		T19E7.24	0.303869	1.52575	0.026046	2.87937
WBGene00003161	mdf-2	Y69A2AR.30	0.0991701	1.52558	0.00494283	2.87902
WBGene00003891	osm-11	F11C7.5	0.0178385	1.52461	0.000556593	2.87708
WBGene00016862		C52A10.1	0.0120259	1.5214	0.000344556	2.87069
WBGene00008726		F13A7.11	0.0721328	1.52023	0.0031963	2.86837
WBGene00196969		R03E9.6	0.29004	1.51734	0.0241698	2.86263
WBGene00007235		C01G10.8	0.00904869	1.517	0.000242615	2.86195
WBGene00000968	dhs-4	T05F1.10	0.0645898	1.51692	0.00275095	2.8618
WBGene00044670	rac-3	K03D3.13	0.290777	1.51607	0.0242515	2.8601
WBGene00015218		B0507.1	0.12752	1.51528	0.00714884	2.85855
WBGene00017108	cyp-43A1	E03E2.1	0.0130787	1.51441	0.000384803	2.85682
WBGene00008263		C53A5.2	0.330699	1.513	0.030257	2.85402
WBGene00001885	his-11	ZK131.5	0.168927	1.51288	0.0106819	2.85379
WBGene00219675	linc-44	F10C1.22	0.328088	1.51271	0.029874	2.85346
WBGene00000780	cpn-4	F49D11.8	0.0209871	1.51158	0.000687139	2.85123
WBGene00001901	his-27	K06C4.13	0.326603	1.50382	0.0295972	2.83593
WBGene00001923	his-49	F07B7.5	0.326603	1.50382	0.0295972	2.83593
WBGene00001757	gst-9	R05F9.5	0.109339	1.50202	0.00565988	2.8324
WBGene00011735	hip-1	T12D8.8	0.00948901	1.50182	0.000258361	2.832
WBGene00007811		C29F7.2	0.0865206	1.50128	0.00412125	2.83093
WBGene00011039		R05H5.4	0.0314349	1.49871	0.00112441	2.82591
WBGene00020859	bath-25	T27C10.4	0.340451	1.49828	0.0318681	2.82506
WBGene00200795		C08B11.12	0.305052	1.49192	0.0262564	2.81262
WBGene00016760		C49A9.6	0.0175992	1.4912	0.00054704	2.81123
WBGene00219847		C34E11.20	0.305851	1.48998	0.0264159	2.80885
WBGene00011230	nud-2	R11A5.2	0.0202451	1.48884	0.000658102	2.80663
WBGene00020914	sulp-6	W01B11.2	0.194328	1.48753	0.0131058	2.80409
WBGene00022204		Y73B3A.2	0.104597	1.48648	0.00533595	2.80204
WBGene00195017		R144.15	0.357949	1.48632	0.0341855	2.80173
WBGene00199692		R07H5.12	0.309456	1.48467	0.0268741	2.79852
WBGene00201005		M04B2.11	0.309481	1.48403	0.0268946	2.79728
WBGene00202035		K02A4.13	0.311531	1.48031	0.0271837	2.79008
WBGene00002005	hsp-1	F26D10.3	0.00918363	1.47454	0.000247868	2.77895
WBGene00012329	sre-44	W07G1.2	0.367718	1.4727	0.035978	2.77541
WBGene00016469		C36B7.6	0.0160275	1.47207	0.00048963	2.7742
WBGene00003602	nhr-3	H01A20.1	0.0364703	1.47197	0.00135212	2.774
WBGene00219570	linc-82	C46F11.11	0.270175	1.4702	0.0217319	2.77061
WBGene00013569	bath-36	Y75B12B.4	0.0271263	1.46737	0.000944543	2.76518
WBGene00019982	srbc-58	R09E12.2	0.364066	1.46452	0.0352338	2.75972
WBGene00007237		C01G10.10	0.0288547	1.46137	0.00102158	2.75369
WBGene00017678	asp-12	F21F8.4	0.159548	1.46043	0.00991852	2.75189
WBGene00202343		F39D8.7	0.297313	1.45775	0.0251141	2.7468
WBGene00021497		Y40C5A.4	0.143101	1.45625	0.00842069	2.74395
WBGene00020658		T21F4.1	0.0338114	1.45567	0.00123348	2.74285
WBGene00001913	his-39	F45F2.2	0.326105	1.45504	0.0294316	2.74164
WBGene00219888		F09G2.14	0.355345	1.45038	0.0338533	2.73281
WBGene00236797		Y71G12B.44	0.344102	1.4494	0.0322507	2.73095
WBGene00016970		C56E6.2	0.0273653	1.44886	0.000956115	2.72993
WBGene00045060		F55B11.7	0.3178	1.44621	0.028202	2.72492
WBGene00201372		W06H8.15	0.380624	1.44593	0.0380895	2.72439
WBGene00005825	srw-78	F18E3.9	0.390889	1.44496	0.0396946	2.72256
WBGene00000082	adt-1	C02B4.1	0.217495	1.44261	0.0155394	2.71813
WBGene00007574		C14B1.3	0.0454385	1.44044	0.00181398	2.71403
WBGene00008592		F08H9.4	0.355345	1.44021	0.0338946	2.71361
WBGene00007689		C18E9.9	0.0402308	1.43858	0.00154881	2.71055
WBGene00016247		C30B5.6	0.297313	1.43811	0.0250998	2.70966
WBGene00014967		Y113G7A.2	0.306337	1.43634	0.0264761	2.70633
WBGene00019818		R02C2.7	0.271477	1.43599	0.0218815	2.70568
WBGene00018619		F48G7.8	0.315048	1.43598	0.0277521	2.70566
WBGene00022282		Y74C10AR.2	0.364597	1.43569	0.0353178	2.70511
WBGene00007036	sod-5	ZK430.3	0.398398	1.43558	0.0408607	2.7049
WBGene00009695		F44F1.3	0.135653	1.435	0.00783542	2.70382
WBGene00009155	lhfp-4	F26D10.11	0.378981	1.43446	0.0378352	2.7028
WBGene00019760	calu-1	M03F4.7	0.0270895	1.43254	0.000941657	2.69921
WBGene00197780		F48B9.10	0.340225	1.43206	0.0317355	2.69832
WBGene00219824		C18C4.17	0.367024	1.43139	0.0358587	2.69707
WBGene00021843		Y54E10BR.4	0.0171178	1.4301	0.000528013	2.69466
WBGene00017482	set-9	F15E6.1	0.0211903	1.42699	0.000698885	2.68886
WBGene00017838		F26G1.2	0.113689	1.42594	0.00598184	2.68689
WBGene00015229	fbxa-125	B0511.3	0.313522	1.42536	0.0274864	2.68582
WBGene00164969		K09C8.9	0.404015	1.42479	0.0418921	2.68475
WBGene00013624	srbc-80	Y102A5C.20	0.403649	1.42327	0.0418063	2.68193
WBGene00020030		R12E2.1	0.0290878	1.42292	0.00103461	2.68128
WBGene00017726		F22H10.2	0.109339	1.42275	0.00566217	2.68097
WBGene00016507	abhd-5.2	C37H5.3	0.0244127	1.42017	0.000829781	2.67616
WBGene00019970		R08F11.7	0.397211	1.41995	0.0406211	2.67577
WBGene00001431	fkb-6	F31D4.3	0.0142748	1.41947	0.000422384	2.67488
WBGene00235369		K08D10.18	0.309304	1.41567	0.0268313	2.66784
WBGene00012295	nmat-1	W06B3.1	0.0630698	1.41197	0.00265254	2.661
WBGene00045356		T03E6.9	0.412279	1.4116	0.0437273	2.66032
WBGene00020118		R155.4	0.280403	1.40934	0.0229871	2.65617
WBGene00008202	clec-197	C49C3.12	0.411599	1.40797	0.0436308	2.65363
WBGene00011321	fil-1	T01C3.4	0.254396	1.4042	0.02001	2.64672
WBGene00018702		F52E4.5	0.147761	1.40206	0.00884392	2.64278
WBGene00023159		W06H8.5	0.0546639	1.40131	0.00225685	2.64141
WBGene00011300		R107.5	0.0650509	1.4	0.00278217	2.63901
WBGene00012086	clec-144	T27D12.3	0.413724	1.3994	0.0439542	2.63791
WBGene00006371	syx-3	F35C8.4	0.0337211	1.39938	0.00122819	2.63788
WBGene00020795		T25D1.3	0.327455	1.39928	0.0297969	2.6377
WBGene00007237		C01G10.10	0.125137	1.39649	0.00691082	2.63259
WBGene00018989		F56F11.2	0.125137	1.3947	0.00690514	2.62933
WBGene00020007		R11F4.1	0.118806	1.39285	0.00641116	2.62597
WBGene00019232	ugt-13	H23N18.1	0.050741	1.3885	0.00207082	2.61806
WBGene00018208		F39G3.3	0.0371228	1.38595	0.00138511	2.61344
WBGene00021872	clec-85	Y54G2A.6	0.0498363	1.38585	0.00202207	2.61325
WBGene00219912		F22H10.10	0.168403	1.3847	0.0106388	2.61118
WBGene00002024	hsp-43	C14F11.5	0.0209871	1.38463	0.000687205	2.61104
WBGene00023246		C33E10.4	0.0762035	1.38454	0.00350788	2.61088
WBGene00020947		W02F12.2	0.153273	1.38341	0.00939205	2.60885
WBGene00013809		Y116A8C.33	0.123784	1.38298	0.00677736	2.60806
WBGene00016332		C32F10.4	0.0516364	1.38217	0.00211745	2.6066
WBGene00200809		T04C12.28	0.373194	1.38132	0.0370096	2.60507
WBGene00017247		F08D12.3	0.12264	1.38074	0.00669288	2.60403
WBGene00007236		C01G10.9	0.0366596	1.37982	0.00136131	2.60235
WBGene00021653		Y47G6A.30	0.421376	1.37932	0.0457853	2.60145
WBGene00219720	linc-2	R144.17	0.334651	1.37835	0.030809	2.5997
WBGene00220134		Y17G7B.25	0.376964	1.37693	0.0375667	2.59716
WBGene00200971		T01B10.13	0.376964	1.37693	0.0375667	2.59716
WBGene00005474	srh-268	C54F6.1	0.406395	1.37663	0.0424862	2.59661
WBGene00015321	fbxc-38	C02B8.2	0.445675	1.37663	0.0500622	2.59661
WBGene00017942	fbxc-37	F31A9.4	0.432257	1.37647	0.0476014	2.59633
WBGene00005283	srh-61	T21B4.8	0.407873	1.37643	0.0429938	2.59626
WBGene00015933		C17H12.8	0.0861867	1.37627	0.00410023	2.59597
WBGene00019202		H14N18.2	0.406395	1.37547	0.0425532	2.59453
WBGene00005394	srh-179	ZK228.7	0.37835	1.37246	0.0377273	2.58911
WBGene00010825		M01G12.14	0.247861	1.37232	0.0191725	2.58887
WBGene00011209		R10E8.3	0.0687994	1.37208	0.00300778	2.58843
WBGene00018325		F42A6.3	0.440785	1.37179	0.0489941	2.58791
WBGene00009773	lipl-2	F46B6.8	0.162397	1.37011	0.0101727	2.58491
WBGene00015942	osta-2	C18A3.4	0.0979612	1.36764	0.00486959	2.58047
WBGene00021068		W06H8.6	0.0901061	1.36591	0.00437221	2.57739
WBGene00006623	try-5	K07B1.1	0.403006	1.36466	0.0417158	2.57516
WBGene00009178	uggt-2	F26H9.8	0.302032	1.36435	0.0257456	2.5746
WBGene00219983		F58D5.11	0.432257	1.36379	0.0475206	2.5736
WBGene00007302		C04F12.8	0.100489	1.36284	0.00503742	2.57191
WBGene00007761	rad-26	C27B7.4	0.0852653	1.36226	0.00403617	2.57087
WBGene00006575	tir-1	F13B10.1	0.042904	1.36213	0.0016848	2.57064
WBGene00021580	clec-174	Y46C8AL.2	0.440785	1.36205	0.048911	2.57051
WBGene00197231		Y48B6A.18	0.440561	1.36181	0.0488177	2.57007
WBGene00016958	ilys-4	C55F2.2	0.103786	1.36058	0.00526996	2.56788
WBGene00086560		ZK355.8	0.418206	1.36018	0.0449266	2.56716
WBGene00018030		F35B3.3	0.390576	1.36014	0.039474	2.56711
WBGene00004096	pqm-1	F40F8.7	0.072828	1.35918	0.00325076	2.5654
WBGene00019070		F58H7.5	0.394045	1.35905	0.0401572	2.56516
WBGene00005686	sru-23	F36G9.6	0.459183	1.35894	0.0529567	2.56497
WBGene00022940		C23H5.10	0.417789	1.35819	0.0448321	2.56364
WBGene00044210		Y51A2D.21	0.155915	1.35788	0.00960015	2.56308
WBGene00020381		T09B4.7	0.347937	1.35392	0.0327133	2.55605
WBGene00011190	swt-6	R10D12.9	0.320412	1.35337	0.028508	2.55508
WBGene00021171		Y8A9A.2	0.139088	1.35288	0.00815153	2.55422
WBGene00008142		C47E8.3	0.310427	1.35262	0.0270426	2.55376
WBGene00007813	jmjd-3.3	C29F7.6	0.205858	1.35258	0.0142017	2.55368
WBGene00009724		F45D3.4	0.207875	1.3511	0.0144703	2.55107
WBGene00008201		C49C3.11	0.373194	1.34956	0.0370139	2.54834
WBGene00017118		E04A4.3	0.466581	1.3484	0.0549391	2.5463
WBGene00001911	his-37	C50F4.7	0.0768913	1.34759	0.00357489	2.54487
WBGene00219734	linc-128	T21H3.11	0.399915	1.3474	0.0412253	2.54452
WBGene00050890		F17C11.16	0.462813	1.34736	0.0539189	2.54446
WBGene00001707	grh-1	Y48G8AR.1	0.208376	1.34634	0.0145856	2.54267
WBGene00021821		Y54B9A.1	0.31236	1.34499	0.0273116	2.54029
WBGene00018465		F45E1.4	0.148818	1.34387	0.00892486	2.53832
WBGene00021050		W05H9.3	0.0796105	1.34358	0.00373071	2.5378
WBGene00008317		C54G4.7	0.0336771	1.34237	0.00122459	2.53567
WBGene00002980	lgg-1	C32D5.9	0.0234864	1.34194	0.000794117	2.53492
WBGene00018353	fbxa-182	F42G2.4	0.280822	1.34167	0.0230381	2.53444
WBGene00003514	myo-2	T18D3.4	0.108193	1.33887	0.00557716	2.52953
WBGene00001263	emb-9	K04H4.1	0.0697457	1.33642	0.00306156	2.52525
WBGene00199753		Y97E10B.12	0.447211	1.33548	0.0506667	2.52359
WBGene00021271	spe-47	Y23H5A.4	0.292575	1.33494	0.0244362	2.52265
WBGene00001030	dnj-12	F39B2.10	0.0330101	1.33412	0.00119837	2.52122
WBGene00013568		Y75B12B.3	0.252543	1.33401	0.0197198	2.52103
WBGene00021799		Y53G8AL.1	0.368573	1.33318	0.0363151	2.51957
WBGene00006470	tag-120	F40F9.2	0.103389	1.32937	0.00524364	2.51292
WBGene00013844	fbxa-50	ZC47.13	0.404728	1.3285	0.0421581	2.51142
WBGene00022570	sdz-35	ZC239.12	0.4716	1.32808	0.0556766	2.51068
WBGene00007324		C05B5.8	0.204959	1.32777	0.0141154	2.51014
WBGene00006959	xbp-1	R74.3	0.0320235	1.32718	0.00115162	2.50911
WBGene00013573		Y75B12B.11	0.477286	1.32619	0.0578687	2.5074
WBGene00016527	fbxa-47	C39B5.9	0.462813	1.32323	0.053881	2.50226
WBGene00008881		F16B12.5	0.447211	1.32216	0.050648	2.5004
WBGene00201778		H01A20.5	0.41667	1.3198	0.0445367	2.49631
WBGene00019983	sti-1	R09E12.3	0.0371496	1.31792	0.00138832	2.49306
WBGene00004836	sls-2.4	R12E2.16	0.417854	1.3167	0.0448639	2.49096
WBGene00016330		C32E12.4	0.0706755	1.31517	0.00311914	2.48832
WBGene00195813		F31C3.13	0.360395	1.31408	0.0345473	2.48644
WBGene00016662		C45B2.8	0.33792	1.30983	0.0314106	2.47912
WBGene00017035		D1065.3	0.444987	1.30918	0.0497568	2.47801
WBGene00198620		F11C7.9	0.47922	1.30916	0.0583376	2.47798
WBGene00005292	srh-71	T10D4.5	0.460583	1.30701	0.0532777	2.47429
WBGene00019730	asns-2	M02D8.4	0.322801	1.30656	0.0288909	2.47351
WBGene00012008		T25B9.2	0.474601	1.30277	0.0568406	2.46702
WBGene00019920	acs-15	R07C3.4	0.315048	1.30268	0.027736	2.46686
WBGene00003738	nid-1	F54F3.1	0.0441922	1.30077	0.00175112	2.4636
WBGene00020760		T24C4.4	0.414081	1.29999	0.0440167	2.46227
WBGene00012684		Y39B6A.25	0.404728	1.2998	0.0421348	2.46194
WBGene00010091	ssp-35	F55C5.1	0.193813	1.298	0.0130489	2.45887
WBGene00012500	hpo-2	Y26D4A.2	0.501081	1.29746	0.0633411	2.45795
WBGene00010245		F58D5.6	0.364609	1.29691	0.0353682	2.45702
WBGene00019303		K02D10.3	0.497539	1.2957	0.0626572	2.45497
WBGene00009291	clec-264	F31D4.4	0.177273	1.29558	0.0115252	2.45476
WBGene00009504		F37B12.1	0.11357	1.2955	0.00596883	2.45463
WBGene00007656		C17H1.3	0.466581	1.29537	0.0548899	2.45439
WBGene00013080		Y51A2D.13	0.0768913	1.29502	0.00357591	2.4538
WBGene00197545		Y53F4B.55	0.435058	1.29471	0.0479756	2.45328
WBGene00219746	linc-91	W09C3.9	0.5002	1.29429	0.0631556	2.45256
WBGene00202483		F26G1.14	0.437066	1.29258	0.0482748	2.44965
WBGene00009393	clec-62	F35C5.5	0.0756585	1.29192	0.00344089	2.44853
WBGene00010293	fbxa-108	F59A1.7	0.117532	1.29153	0.00623284	2.44787
WBGene00002114	ins-31	T10D4.4	0.459183	1.29126	0.0529603	2.44742
WBGene00044030		Y17G7B.23	0.513105	1.29097	0.0661394	2.44692
WBGene00004778	ser-3	K02F2.6	0.172309	1.29073	0.0110651	2.44652
WBGene00020481		T13C2.6	0.138112	1.29027	0.00806979	2.44573
WBGene00013764		Y113G7B.15	0.513127	1.28947	0.0662155	2.44438
WBGene00008298		C54D10.3	0.0728406	1.28905	0.0032678	2.44368
WBGene00018878	glit-1	F55D10.3	0.105039	1.28625	0.0053731	2.43894
WBGene00002131	inx-9	ZK792.3	0.12141	1.28524	0.0065708	2.43722
WBGene00022116		Y71F9AL.11	0.484025	1.28523	0.0595809	2.4372
WBGene00000703	col-129	M18.1	0.172309	1.28372	0.0110739	2.43466
WBGene00000621	col-44	F54B11.2	0.47996	1.2831	0.058675	2.43362
WBGene00013789		Y116A8C.9	0.0885519	1.28304	0.00427579	2.43351
WBGene00017456		F14D2.8	0.125326	1.28046	0.0069361	2.42917
WBGene00011643	slc-17.9	T09B9.2	0.393949	1.28012	0.040124	2.42859
WBGene00001936	his-62	F55G1.3	0.293826	1.27995	0.024715	2.42831
WBGene00200397		ZK632.17	0.476438	1.27907	0.0573997	2.42682
WBGene00199983		T04C12.25	0.445675	1.2783	0.0501774	2.42553
WBGene00018233		F40E3.6	0.445675	1.2783	0.0501774	2.42553
WBGene00007833	oac-6	C31A11.5	0.217795	1.27667	0.0155937	2.42279
WBGene00005816	srw-69	F18E3.5	0.447211	1.27595	0.0506295	2.42158
WBGene00017573		F18E9.7	0.446616	1.27542	0.0504635	2.42069
WBGene00000593	col-2	W01B6.7	0.517499	1.27458	0.0672276	2.41928
WBGene00016733	phat-2	C46H11.9	0.416928	1.27418	0.0446778	2.41862
WBGene00005921	srx-30	F41H8.3	0.447211	1.27391	0.0506689	2.41816
WBGene00003242	mig-6	C37C3.6	0.145652	1.27335	0.00864858	2.41723
WBGene00003799	npp-13	Y37E3.15	0.522004	1.27147	0.0682245	2.41407
WBGene00006714	ubc-19	Y69H2.6	0.207143	1.27071	0.0143226	2.4128
WBGene00013923	ghi-1	ZK20.1	0.171406	1.27041	0.0109505	2.4123
WBGene00016516		C38C3.8	0.492523	1.27015	0.0614996	2.41186
WBGene00005818	srw-71	F18E3.6	0.530268	1.26976	0.0704277	2.41122
WBGene00022383		Y95B8A.2	0.380375	1.2687	0.0380195	2.40945
WBGene00003252	mig-21	F01F1.13	0.40415	1.26782	0.0419302	2.40797
WBGene00007883		C33A12.4	0.229777	1.2665	0.0170104	2.40576
WBGene00043948		ZC262.7	0.134722	1.26348	0.00771989	2.40074
WBGene00020737		T23F2.4	0.524931	1.26262	0.0690961	2.3993
WBGene00012721		Y39E4B.13	0.41667	1.26018	0.0446132	2.39526
WBGene00000820	csp-2	Y73B6BL.7	0.275028	1.25981	0.0223181	2.39464
WBGene00017729		F22H10.5	0.537107	1.25678	0.0720369	2.38962
WBGene00017146		EGAP1.1	0.517249	1.25626	0.0671526	2.38875
WBGene00021011		W03G1.5	0.390576	1.25563	0.0393933	2.38772
WBGene00016180		C28C12.4	0.258379	1.25545	0.0204	2.38742
WBGene00006781	unc-45	F30H5.1	0.0604435	1.25479	0.00252774	2.38632
WBGene00001812	haf-2	F43E2.4	0.0759786	1.24961	0.0034878	2.37777
WBGene00005657	srr-6	C13D9.1	0.460971	1.24908	0.0533762	2.37689
WBGene00004231	ptr-17	Y18D10A.7	0.458895	1.24779	0.0527936	2.37478
WBGene00012872		Y45F10B.8	0.461651	1.24721	0.053537	2.37382
WBGene00015759		C14C6.5	0.155252	1.24533	0.00954093	2.37073
WBGene00004460	rpn-3	C30C11.2	0.0894208	1.24291	0.00432835	2.36675
WBGene00016310		C32D5.1	0.207143	1.24093	0.0143527	2.36351
WBGene00004317	rbg-1	F20D1.6	0.0917418	1.24082	0.00448423	2.36333
WBGene00194659	linc-1	W09C5.11	0.558239	1.24049	0.0770236	2.36279
WBGene00206489		F53F1.14	0.444177	1.24024	0.0495609	2.36238
WBGene00013388		Y62F5A.10	0.327327	1.24001	0.0297464	2.362
WBGene00003148	mbf-1	H21P03.1	0.0690283	1.23994	0.00302188	2.36188
WBGene00013744		Y111B2A.27	0.53317	1.23911	0.0711927	2.36052
WBGene00017061	oac-12	D2063.2	0.560448	1.23703	0.0778741	2.35713
WBGene00012543	nkcc-1	Y37A1C.1	0.0711161	1.23646	0.00314281	2.3562
WBGene00010546		K03H1.11	0.126394	1.23546	0.0070477	2.35456
WBGene00013331		Y57G11C.42	0.4716	1.23537	0.0557511	2.35441
WBGene00009433		F35E12.9	0.305375	1.23434	0.0263205	2.35273
WBGene00010362	enu-3.1	H04D03.1	0.118694	1.23415	0.00638604	2.35242
WBGene00010125	dod-22	F55G11.5	0.334653	1.23252	0.0308876	2.34977
WBGene00022229		Y73B6A.2	0.477286	1.23184	0.0578227	2.34866
WBGene00019719		M01H9.3	0.0705567	1.23075	0.00310972	2.34688
WBGene00015066		B0228.9	1	1.23005	0.0576455	2.34575
WBGene00020743	mam-8	T23H2.4	0.453558	1.22779	0.0519227	2.34208
WBGene00012505		Y26D4A.8	0.560989	1.22694	0.0780478	2.34069
WBGene00197597		M163.17	0.544703	1.22513	0.0735363	2.33777
WBGene00007913	cyp-36A1	C34B7.3	0.186534	1.22423	0.0123914	2.3363
WBGene00017559	mpz-3	F18C5.4	0.367955	1.22404	0.0361233	2.33601
WBGene00197552		Y49F6B.15	0.533757	1.22358	0.0713307	2.33526
WBGene00012840	grsp-1	Y43F8C.20	0.208353	1.22311	0.0145469	2.33449
WBGene00011869	dod-6	T20G5.7	0.109339	1.22256	0.00565394	2.33361
WBGene00010128		F55G11.8	0.238998	1.22139	0.0181069	2.33172
WBGene00001921	his-47	B0035.7	0.275065	1.22011	0.0223374	2.32964
WBGene00008117	gsr-1	C46F11.2	0.063388	1.22002	0.0026772	2.3295
WBGene00219739	linc-136	T27C4.6	0.432257	1.21842	0.0476155	2.32692
WBGene00019893	sgt-1	R05F9.10	0.0871547	1.21727	0.00418497	2.32507
WBGene00020245		T05B11.1	0.20362	1.21706	0.0139968	2.32473
WBGene00018183		F38E1.11	1	1.21689	0.0598137	2.32446
WBGene00200181		ZK637.19	1	1.21689	0.0598137	2.32446
WBGene00194803		C25F9.16	0.544703	1.21684	0.0735663	2.32437
WBGene00001404	fbp-1	K07A3.1	0.404737	1.21649	0.0422072	2.3238
WBGene00011715		T11F9.14	0.484585	1.2164	0.0598222	2.32366
WBGene00012942		Y47D3B.6	0.47922	1.21536	0.05837	2.32199
WBGene00012320	srxa-3	W07A8.4	0.572621	1.21484	0.0818613	2.32115
WBGene00012623	fbxa-149	Y38H6C.10	0.238998	1.21484	0.0180802	2.32115
WBGene00003884	osm-3	M02B7.3	0.253791	1.21337	0.0199172	2.31879
WBGene00001891	his-17	K06C4.5	0.438855	1.21255	0.0485505	2.31747
WBGene00023486		K08B4.7	0.458895	1.21212	0.0528595	2.31678
WBGene00021253		Y22D7AL.15	0.112108	1.21182	0.00587973	2.31629
WBGene00004157	pqn-75	W03D2.1	0.274744	1.20632	0.0222461	2.30748
WBGene00219712	linc-167	K09H9.10	0.556922	1.20392	0.0765777	2.30365
WBGene00017977		F32B5.3	0.571701	1.20086	0.0816618	2.29877
WBGene00199201		Y71F9AL.19	0.5769	1.20078	0.0828494	2.29864
WBGene00007652		C17G1.5	0.181581	1.19961	0.011913	2.29678
WBGene00020764		T24C12.1	0.503019	1.19953	0.0637651	2.29664
WBGene00007630	har-1	C16C10.11	0.0692483	1.19912	0.00303562	2.29599
WBGene00017007		D1007.10	0.568343	1.19877	0.0804405	2.29544
WBGene00007486		C09G1.4	0.199371	1.19875	0.0136004	2.29541
WBGene00206469		F58D2.5	0.571701	1.19677	0.0816376	2.29226
WBGene00021331	glrx-10	Y34D9A.6	0.0756585	1.19672	0.00344677	2.29217
WBGene00219605	linc-110	T09A5.22	0.425244	1.19472	0.0463637	2.289
WBGene00077753		R13.6	1	1.19281	0.0729935	2.28598
WBGene00015816		C16A11.3	0.125966	1.1907	0.00701638	2.28264
WBGene00018874	tag-234	F55C12.7	0.407431	1.19012	0.0428635	2.28172
WBGene00005661	srr-10	T05B11.6	1	1.18912	0.064599	2.28014
WBGene00197334		T25F10.8	1	1.18912	0.064599	2.28014
WBGene00021489		Y40B10A.4	0.52676	1.18885	0.069593	2.27971
WBGene00219562	linc-28	C25F9.18	1	1.18879	0.0646685	2.27962
WBGene00018990	klf-1	F56F11.3	0.136107	1.18705	0.00788802	2.27686
WBGene00000380	cct-5	C07G2.3	0.0679701	1.18683	0.00294733	2.27652
WBGene00000216	asp-3	H22K11.1	0.0822468	1.18643	0.00385913	2.2759
WBGene00007304	ttr-39	C04G2.1	0.222591	1.1859	0.0162275	2.27505
WBGene00007007	mak-2	C44C8.6	0.118627	1.18539	0.00635751	2.27424
WBGene00010882	atg-7	M7.5	0.116221	1.1847	0.00614953	2.27316
WBGene00019178	scl-12	H10D18.2	0.56741	1.18365	0.0801771	2.27151
WBGene00219786		B0365.10	1	1.18259	0.0657447	2.26984
WBGene00021544		Y43B11AR.3	0.125286	1.18244	0.00692649	2.2696
WBGene00016982		C56G2.9	0.477341	1.18078	0.057905	2.26699
WBGene00003844	odc-1	K11C4.4	0.234282	1.17947	0.0174715	2.26494
WBGene00196034		T04C12.16	1	1.17599	0.0668767	2.25948
WBGene00005396	srh-181	ZK228.6	1	1.17591	0.0760602	2.25936
WBGene00019772		M04G7.1	0.232101	1.17568	0.0172513	2.259
WBGene00020579		T19D12.4	0.444996	1.17473	0.0497974	2.2575
WBGene00015052	clec-52	B0218.8	0.326603	1.17325	0.0295715	2.25519
WBGene00015741		C13F10.1	0.42197	1.17172	0.0458815	2.25281
WBGene00005902	srx-11	Y97E10B.6	1	1.17071	0.0677709	2.25122
WBGene00020710		T23B3.2	0.230656	1.17032	0.0170892	2.25061
WBGene00015356	tag-278	C02F12.7	0.247331	1.16906	0.0190849	2.24865
WBGene00077750		W01B6.11	0.611213	1.16897	0.0947747	2.24851
WBGene00006698	uaf-2	Y116A8C.35	0.101798	1.16776	0.00515525	2.24663
WBGene00008609		F09B12.5	0.612748	1.16593	0.095776	2.24378
WBGene00011040		R05H5.5	0.167037	1.16443	0.0105426	2.24145
WBGene00019888	btbd-10	R05F9.1	0.158945	1.1636	0.00983545	2.24016
WBGene00020012		R11G1.6	0.208139	1.16296	0.0145082	2.23916
WBGene00000763	coq-3	Y57G11C.11	0.236508	1.16151	0.0177472	2.23692
WBGene00021284		Y24D9A.6	0.611158	1.16142	0.094246	2.23677
WBGene00019300	swt-1	K02D7.5	0.407431	1.16078	0.0427703	2.23579
WBGene00019744		M02H5.8	0.353932	1.1586	0.0336656	2.2324
WBGene00018097	clec-208	F36F12.6	0.615975	1.15784	0.0964648	2.23123
WBGene00006495	cpna-1	F31D5.3	0.136107	1.15626	0.00788242	2.22879
WBGene00010962	ctc-3	MTCE.23	0.0945656	1.15625	0.00465966	2.22877
WBGene00018971	clec-67	F56D6.2	0.282407	1.15584	0.0232352	2.22814
WBGene00022535		ZC178.1	1	1.15564	0.0808372	2.22783
WBGene00005106	srd-28	M01B2.2	1	1.15547	0.0809889	2.22757
WBGene00012965	fipr-17	Y48A6B.4	1	1.1552	0.0808378	2.22715
WBGene00010682		K08F8.5	0.486103	1.15468	0.0602367	2.22634
WBGene00197424		K11D9.6	1	1.154	0.0709757	2.2253
WBGene00011653	oac-43	T09E11.4	1	1.154	0.0709757	2.2253
WBGene00008351		cTel7X.1	0.611679	1.15189	0.095246	2.22205
WBGene00016785		C49G7.7	0.627258	1.1518	0.100314	2.22192
WBGene00000712	col-139	F41F3.4	0.283674	1.15105	0.0235077	2.22076
WBGene00002280	let-2	F01G12.5	0.172255	1.151	0.0110354	2.22068
WBGene00006628	tsp-2	C02F5.11	0.578416	1.14708	0.0831701	2.21466
WBGene00021709	ugt-29	Y49C4A.8	0.12665	1.14702	0.00706952	2.21455
WBGene00011874		T20G5.13	1	1.14646	0.0827254	2.21369
WBGene00012819		Y43F8B.9	0.419348	1.14461	0.0451212	2.21086
WBGene00001910		C50F4.6	0.364609	1.14421	0.0354703	2.21024
WBGene00008910		F17C8.3	0.38048	1.14283	0.0380525	2.20814
WBGene00015837	math-8	C16C4.13	0.637322	1.14268	0.103813	2.2079
WBGene00044070	set-18	T22A3.4	0.346088	1.14254	0.0324983	2.2077
WBGene00012171		W01B6.4	0.604041	1.14213	0.0909888	2.20706
WBGene00003415	mars-1	F58B3.5	0.35302	1.14095	0.0334578	2.20526
WBGene00002023	hsp-25	C09B8.6	0.11489	1.13974	0.00606552	2.20342
WBGene00220052		R166.10	1	1.13762	0.0742555	2.20017
WBGene00014770		F54F3.2	1	1.1374	0.0743056	2.19984
WBGene00022621		ZC477.7	0.588378	1.13574	0.0858241	2.19731
WBGene00014155		ZK930.5	0.523237	1.13521	0.0687307	2.1965
WBGene00000910	daf-14	F01G10.8	0.173258	1.13408	0.0111614	2.19478
WBGene00196721		F57B10.17	1	1.13329	0.0750997	2.19359
WBGene00022711	irld-63	ZK355.1	1	1.13276	0.075226	2.19278
WBGene00016732	phat-1	C46H11.8	0.620884	1.13249	0.0982631	2.19236
WBGene00013107		Y51H4A.13	0.485921	1.13152	0.0601276	2.1909
WBGene00011573	anmt-3	T07C12.9	0.324742	1.13078	0.0291689	2.18977
WBGene00220035		M60.15	0.586002	1.13071	0.0850419	2.18966
WBGene00201398		F31C3.16	1	1.13006	0.0756169	2.18867
WBGene00011873		T20G5.12	0.608454	1.12939	0.0933109	2.18767
WBGene00007541	fipr-4	C12D8.14	0.516149	1.12668	0.0668379	2.18356
WBGene00001328	epi-1	K08C7.3	0.146575	1.12624	0.00872077	2.18289
WBGene00020862	fip-2	T27E4.4	0.249093	1.12523	0.0192958	2.18137
WBGene00009374		F34D10.4	0.110312	1.12435	0.00575184	2.18003
WBGene00005815	srw-68	F18E3.4	1	1.12365	0.0770546	2.17898
WBGene00017965		F31F7.2	0.569819	1.12316	0.0808185	2.17824
WBGene00021354	fpn-1.1	Y37E3.16	0.15311	1.12223	0.00936389	2.17684
WBGene00001037	dnj-19	T05C3.5	0.106963	1.12083	0.00548204	2.17472
WBGene00017060		D2063.1	0.516759	1.1205	0.0669782	2.17422
WBGene00019689		K12H6.9	0.558772	1.12049	0.0773624	2.17421
WBGene00013448		Y66D12A.24	0.240397	1.11976	0.0182672	2.17311
WBGene00018350	ifo-1	F42C5.10	0.213613	1.1192	0.0151422	2.17227
WBGene00044788	ttr-38	F35G8.2	0.478885	1.1192	0.0582343	2.17227
WBGene00001899	his-25	ZK131.2	0.534675	1.11871	0.0715522	2.17153
WBGene00006699	uba-1	C47E12.5	0.151769	1.1169	0.00920983	2.1688
WBGene00022444		Y110A2AL.7	1	1.11655	0.0898107	2.16828
WBGene00000936	dbl-1	T25F10.2	0.237726	1.11614	0.017895	2.16766
WBGene00219563	linc-95	C32A3.8	0.398369	1.11536	0.0408342	2.16648
WBGene00219761	linc-143	Y55D5A.11	0.641379	1.1148	0.105214	2.16566
WBGene00044346		Y59E9AL.8	0.628377	1.11476	0.101014	2.16559
WBGene00015142		B0310.6	0.657835	1.11467	0.111708	2.16545
WBGene00015176	vps-51	B0414.8	0.224672	1.11425	0.016479	2.16482
WBGene00001878	his-4	T10C6.11	0.649929	1.11413	0.108932	2.16465
WBGene00198692		C09H10.13	0.628636	1.11316	0.101131	2.1632
WBGene00008657	clec-154	F10F2.5	0.555818	1.11305	0.076228	2.16303
WBGene00007010	alx-1	R10E12.1	0.112108	1.11303	0.00587734	2.163
WBGene00017979		F32B5.6	0.561174	1.11287	0.0781277	2.16276
WBGene00021020		W04B5.3	0.189386	1.11256	0.0126385	2.16228
WBGene00019748	atg-2	M03A8.2	0.298358	1.11015	0.025344	2.15868
WBGene00045168		B0285.12	0.657628	1.10998	0.111334	2.15842
WBGene00010166	gmd-2	F56H6.5	0.664466	1.10944	0.113911	2.15762
WBGene00011325		T01C3.11	0.60792	1.10729	0.092461	2.15441
WBGene00009824	gpdh-1	F47G4.3	0.473005	1.10662	0.0561445	2.1534
WBGene00003495	mup-2	T22E5.5	0.2726	1.10654	0.0219938	2.15329
WBGene00019953	wapl-1	R08C7.10	0.400848	1.10508	0.0413735	2.15111
WBGene00009043		F22B5.5	0.451508	1.10411	0.0515305	2.14966
WBGene00011855	clec-183	T20D3.1	0.627614	1.10345	0.100445	2.14868
WBGene00044257		Y45F10D.16	0.657802	1.1024	0.111503	2.14712
WBGene00007543	fipr-7	C12D8.16	0.43086	1.1021	0.047308	2.14667
WBGene00019612	gpcp-1	K10B3.6	0.244009	1.10191	0.0186719	2.14639
WBGene00008503		F01G4.4	0.244009	1.09873	0.0186711	2.14165
WBGene00019928	clec-44	R07C3.12	1	1.0986	0.0940815	2.14146
WBGene00003067	lrg-1	F55H2.4	0.149685	1.09857	0.00900346	2.14142
WBGene00017440	upb-1	F13H8.7	0.125664	1.09831	0.00699195	2.14103
WBGene00022378		Y94H6A.5	0.180562	1.09762	0.0118247	2.14002
WBGene00044374		C17F4.12	0.643616	1.09713	0.106393	2.13929
WBGene00022143		Y71G12B.3	0.479712	1.09602	0.0585064	2.13764
WBGene00011108		R07E3.7	0.353932	1.09564	0.033636	2.13707
WBGene00000616	col-39	C09G5.4	0.506145	1.09549	0.0647018	2.13686
WBGene00020672		T22B7.3	0.60414	1.0954	0.0912609	2.13673
WBGene00004114	pqn-25	D1044.3	0.376812	1.09529	0.0374445	2.13656
WBGene00006754	unc-15	F07A5.7	0.176358	1.09503	0.0114552	2.13617
WBGene00044588		ZK1236.9	0.57031	1.09413	0.081091	2.13484
WBGene00014225		ZK1098.9	0.558605	1.0928	0.0772504	2.13287
WBGene00007868		C32H11.5	0.618887	1.09257	0.0975799	2.13254
WBGene00017389	lgc-38	F11H8.2	0.611213	1.09237	0.0947721	2.13225
WBGene00014852		W02A11.6	0.419597	1.0917	0.045499	2.13124
WBGene00235281		Y4C6A.68	0.596045	1.09158	0.0884627	2.13108
WBGene00010658		K08D8.4	0.364609	1.09104	0.0354562	2.13027
WBGene00000056	acr-17	F53E10.2	0.571356	1.08947	0.0813605	2.12796
WBGene00015128		B0303.7	0.156562	1.08929	0.00964928	2.12769
WBGene00000683	col-109	Y38C1BA.3	0.611158	1.0887	0.0942586	2.12683
WBGene00019059		F58F9.6	1	1.08833	0.0842056	2.12627
WBGene00045052		K12C11.6	0.460449	1.08722	0.0532064	2.12464
WBGene00005651	srp-10	F09C6.4	0.62153	1.08605	0.0987339	2.12292
WBGene00022818		ZK783.3	0.657802	1.08512	0.111601	2.12155
WBGene00021895	clec-84	Y54G2A.33	0.180017	1.08475	0.0117677	2.12101
WBGene00206356		T08B2.15	0.611213	1.08451	0.0945498	2.12065
WBGene00014755		F40F12.8	0.570351	1.08442	0.0811308	2.12053
WBGene00199783		K11D9.7	1	1.08415	0.0854664	2.12013
WBGene00009588		F40F11.3	0.322763	1.0826	0.0288147	2.11785
WBGene00000502	chp-1	Y110A7A.13	0.179497	1.08256	0.0117017	2.1178
WBGene00021951	srt-24	Y55F3C.8	1	1.0821	0.0859086	2.11712
WBGene00235316		B0222.15	0.676006	1.08195	0.118716	2.1169
WBGene00196110		T01C2.3	1	1.08161	0.0860319	2.1164
WBGene00020678		T22B11.4	0.148988	1.08142	0.00894389	2.11612
WBGene00012345		W08E3.4	0.445675	1.08137	0.0499727	2.11605
WBGene00007898		C33D9.3	0.249093	1.08066	0.0192974	2.115
WBGene00015046	nlp-34	B0213.17	0.60195	1.07902	0.0899462	2.1126
WBGene00001882	his-8	F45F2.12	0.659978	1.07825	0.112296	2.11147
WBGene00016722		C46G7.2	0.171034	1.07822	0.0109065	2.11143
WBGene00002010	hsp-6	C37H5.8	0.12752	1.07802	0.00715588	2.11113
WBGene00010935		M163.1	0.239317	1.07789	0.01816	2.11095
WBGene00201625		F45D3.15	1	1.07742	0.110542	2.11026
WBGene00045154		C10C6.8	1	1.07742	0.110542	2.11026
WBGene00002348	myo-1	R06C7.10	0.280403	1.07601	0.0229715	2.10819
WBGene00197592		F52D10.9	1	1.0752	0.0874324	2.10701
WBGene00010092		F55C5.2	0.581972	1.07519	0.0839576	2.107
WBGene00007772	egrh-1	C27C12.2	0.245365	1.07507	0.0188048	2.10682
WBGene00004146	pqn-63	T06E4.11	0.603316	1.07472	0.0904724	2.10631
WBGene00020276		T05H4.15	1	1.07453	0.0876122	2.10604
WBGene00044222		T16G12.10	1	1.07453	0.0876122	2.10604
WBGene00019335		K02F6.1	0.554753	1.0734	0.0759776	2.10438
WBGene00007992	fipr-24	C37A5.8	0.686802	1.07308	0.123443	2.10392
WBGene00249826		F42A9.18	0.696793	1.07025	0.127537	2.0998
WBGene00022307		Y77E11A.2	0.219698	1.06949	0.015782	2.0987
WBGene00019221		H20J04.6	0.191314	1.06849	0.0128012	2.09723
WBGene00011405	clec-155	T04A8.3	0.620074	1.06776	0.0979878	2.09618
WBGene00017728		F22H10.4	0.662748	1.06737	0.113066	2.09562
WBGene00016596		C42D4.3	0.604041	1.06728	0.090977	2.09548
WBGene00012785		Y43C5B.2	0.621448	1.06691	0.0985222	2.09495
WBGene00002250	lap-2	W07G4.4	0.137123	1.06629	0.00797944	2.09404
WBGene00000671	col-96	Y41C4A.19	0.210739	1.06626	0.014801	2.094
WBGene00017698		F22B7.9	0.2726	1.06495	0.022024	2.09209
WBGene00014996		ZK1251.5	0.582366	1.06416	0.0840835	2.09095
WBGene00020898		T28D9.9	0.628008	1.06409	0.100657	2.09085
WBGene00000972	dhs-8	K10H10.3	0.628377	1.06295	0.100945	2.0892
WBGene00008486	ugt-44	F01D4.2	0.217668	1.06245	0.0155717	2.08847
WBGene00007440		C08E8.4	0.40997	1.0621	0.0433609	2.08797
WBGene00003071	lrp-1	F29D11.1	0.362627	1.06208	0.0349381	2.08794
WBGene00010457		K01C8.2	0.639319	1.06134	0.104479	2.08688
WBGene00011102		R07E3.1	0.309801	1.06009	0.0269408	2.08507
WBGene00001928	his-54	F07B7.11	0.568925	1.05914	0.0805566	2.08369
WBGene00011303		R166.3	0.211461	1.0588	0.0148642	2.08319
WBGene00050947		K07C5.13	0.700931	1.05771	0.131196	2.08163
WBGene00044051		Y57A10A.37	1	1.05754	0.0913104	2.08139
WBGene00044358		Y71G12B.33	0.657835	1.05752	0.11172	2.08135
WBGene00010348		H01G02.1	0.3085	1.0549	0.0267179	2.07758
WBGene00005619	srj-34	T07C12.5	0.662833	1.05356	0.113459	2.07564
WBGene00007514	catp-8	C10C6.6	0.185463	1.05337	0.0122556	2.07537
WBGene00044906		Y67A10A.11	1	1.05316	0.106161	2.07507
WBGene00077704		F12A10.9	1	1.05316	0.106161	2.07507
WBGene00018999		F57B9.8	0.498144	1.05299	0.0627925	2.07483
WBGene00006947	wrt-1	ZK1290.12	0.613994	1.05215	0.0960071	2.07362
WBGene00019770		M04F3.4	0.282676	1.05179	0.023358	2.0731
WBGene00044362		F42G2.7	0.705462	1.0508	0.134692	2.07168
WBGene00012450		Y17D7B.2	0.705462	1.05056	0.134651	2.07133
WBGene00004906	snf-7	ZK1010.9	0.596087	1.05045	0.0886458	2.07117
WBGene00021041		W05G11.4	0.695119	1.04989	0.126959	2.07037
WBGene00007553		C13G3.1	0.460432	1.04976	0.0531772	2.07019
WBGene00000379	cct-4	K01C8.10	0.168943	1.04926	0.0107051	2.06946
WBGene00016901		C53C11.4	0.667847	1.04904	0.1156	2.06916
WBGene00005757	srw-10	ZC482.6	1	1.0486	0.107219	2.06852
WBGene00003893	ost-1	C44B12.2	0.259961	1.04838	0.0206791	2.0682
WBGene00015549		C06G3.3	0.707537	1.04758	0.135732	2.06706
WBGene00023262		C54F6.2	0.694713	1.04586	0.126843	2.06459
WBGene00200996		ZK675.7	1	1.04572	0.0942641	2.0644
WBGene00021457		Y39F10C.1	0.672998	1.04527	0.116731	2.06375
WBGene00012728		Y39G8B.9	0.530372	1.04487	0.0705045	2.06317
WBGene00000667	col-92	W05B2.6	0.492621	1.04421	0.0617164	2.06223
WBGene00008940		F18H3.4	0.25036	1.04341	0.0194846	2.06109
WBGene00013556		Y75B8A.23	0.503144	1.04322	0.0638107	2.06083
WBGene00000174	aqp-6	C32C4.2	0.678851	1.04234	0.120001	2.05956
WBGene00022760		ZK546.3	0.56246	1.04231	0.0785402	2.05952
WBGene00019881		R05D3.8	0.404472	1.04119	0.0420307	2.05793
WBGene00009382		F34H10.5	0.703632	1.04085	0.133408	2.05745
WBGene00000603	col-14	C46A5.3	0.633418	1.03998	0.102276	2.0562
WBGene00018750		F53C3.6	0.696793	1.03923	0.127637	2.05513
WBGene00000706	col-132	C39E9.9	0.710409	1.03908	0.137842	2.05491
WBGene00219631	anr-37	Y113G7B.29	1	1.03854	0.109783	2.05414
WBGene00016731		C46H11.7	0.697494	1.03693	0.128977	2.05186
WBGene00011808		T16G12.7	0.563887	1.03685	0.0793415	2.05174
WBGene00017302		F09F7.5	0.245645	1.03675	0.0188408	2.0516
WBGene00001441	fkh-9	K03C7.2	0.203602	1.03642	0.0139616	2.05113
WBGene00008852	ubql-1	F15C11.2	0.222927	1.03621	0.0162785	2.05084
WBGene00001726	grl-17	C56A3.1	0.701521	1.03485	0.132153	2.0489
WBGene00017711		F22E5.13	0.575925	1.03402	0.0825787	2.04773
WBGene00018048	clec-137	F35D11.8	1	1.03363	0.11021	2.04717
WBGene00008245	fipr-10	C50H2.12	0.480839	1.03355	0.0588998	2.04705
WBGene00022581		ZC262.4	0.701521	1.03347	0.131864	2.04694
WBGene00019338		K02F6.4	0.713067	1.03283	0.139035	2.04604
WBGene00021369	siah-1	Y37E11AR.2	0.364066	1.03277	0.0352447	2.04595
WBGene00010743		K10D6.3	0.70317	1.03141	0.133128	2.04402
WBGene00016978		C56G2.3	0.272832	1.0312	0.022059	2.04372
WBGene00017391		F12A10.2	0.720251	1.03048	0.142401	2.0427
WBGene00019720		M01H9.4	0.600258	1.02992	0.0896222	2.04191
WBGene00011104	cut-5	R07E3.3	0.687738	1.02954	0.12439	2.04137
WBGene00015103		B0280.7	0.713173	1.02906	0.139364	2.04069
WBGene00044979		Y41E3.19	0.627847	1.02902	0.100532	2.04064
WBGene00196986		H01A20.2	1	1.02864	0.0984863	2.0401
WBGene00010176		F56H11.6	1	1.02824	0.124903	2.03954
WBGene00021015	enu-3.3	W03G9.3	0.214455	1.02808	0.0152339	2.03932
WBGene00003561	ncr-1	F02E8.6	0.414951	1.02742	0.0442076	2.03838
WBGene00018730		F53A9.7	0.40997	1.02707	0.0433566	2.03788
WBGene00219701	anr-34	F54F2.12	0.670001	1.02691	0.116092	2.03766
WBGene00018394		F43E2.6	0.602438	1.02681	0.0901867	2.03751
WBGene00008658	clec-152	F10F2.6	0.637049	1.02667	0.103545	2.03732
WBGene00002208	kin-26	T06C10.6	0.565624	1.02641	0.0796866	2.03695
WBGene00017727		F22H10.3	0.222492	1.02628	0.0161808	2.03676
WBGene00003066	lpl-1	ZC410.7	0.617228	1.02597	0.0969889	2.03632
WBGene00001877	his-3	T10C6.12	0.627258	1.0259	0.100294	2.03624
WBGene00009394	clec-63	F35C5.6	0.247207	1.02575	0.0190486	2.03601
WBGene00008137	sfxn-1.4	C47D12.3	0.523237	1.02571	0.0687263	2.03596
WBGene00000629	col-52	D1007.2	1	1.02521	0.133523	2.03526
WBGene00001345	fos-1	F29G9.4	0.368508	1.02513	0.0362868	2.03515
WBGene00020021		R12B2.7	0.702786	1.02397	0.132824	2.0335
WBGene00019222		H20J04.7	1	1.02382	0.114063	2.0333
WBGene00220142		Y37F4.15	1	1.02367	0.0997212	2.03308
WBGene00006672	twk-18	C24A3.6	0.22754	1.02288	0.0167368	2.03197
WBGene00018523	lact-1	F46H5.8	0.317566	1.02265	0.0281624	2.03165
WBGene00008628	ttr-21	F09F3.6	0.334531	1.02205	0.0307644	2.03081
WBGene00013544		Y75B8A.7	0.222036	1.02174	0.0161081	2.03037
WBGene00022108		Y71F9AL.2	0.57031	1.02093	0.0810745	2.02922
WBGene00018380	decr-1.1	F43C11.3	0.438267	1.02084	0.0484578	2.0291
WBGene00004099	abu-15	C03A7.4	0.642868	1.02009	0.106052	2.02804
WBGene00017305	nspb-12	F09F7.8	0.637649	1.02	0.103924	2.02792
WBGene00007544	fipr-6	C12D8.17	0.571701	1.01886	0.0814964	2.02632
WBGene00013478		Y69E1A.8	0.655839	1.01804	0.110668	2.02516
WBGene00021805		Y53G8AM.5	1	1.01675	0.136725	2.02336
WBGene00004121	ptrn-1	F35B3.5	0.682794	1.01667	0.121629	2.02325
WBGene00016557	ceh-84	C40D2.4	1	1.01635	0.101372	2.0228
WBGene00045129		Y75B12B.12	1	1.01635	0.101372	2.0228
WBGene00198804		T28B11.14	1	1.01635	0.101372	2.0228
WBGene00007734		C25G4.7	0.730054	1.01591	0.148087	2.02218
WBGene00009746		F46A8.3	0.701521	1.01565	0.131558	2.02181
WBGene00007362	cyp-35C1	C06B3.3	0.419498	1.01509	0.0454553	2.02103
WBGene00007525		C11G10.1	0.583227	1.01464	0.0843807	2.0204
WBGene00201688		Y71A12B.31	1	1.01448	0.101985	2.02018
WBGene00013076		Y51A2D.8	0.730054	1.01431	0.148817	2.01993
WBGene00220237		ZK20.10	1	1.01379	0.101901	2.0192
WBGene00012989		Y48C3A.5	0.404737	1.01231	0.0422051	2.01714
WBGene00201467		F36H12.65	0.5894	1.01211	0.0861129	2.01686
WBGene00014024		ZK637.4	0.676006	1.01193	0.118602	2.01661
WBGene00000672	col-97	ZK1010.7	0.676006	1.01179	0.117768	2.01642
WBGene00003771	nlp-33	T19C4.7	0.545555	1.0117	0.0737526	2.01629
WBGene00006890	vem-1	K07E3.8	0.278372	1.01154	0.022672	2.01606
WBGene00017071	aagr-1	D2096.3	0.410674	1.01073	0.0434597	2.01492
WBGene00002717	let-526	C01G8.9	0.329664	1.01064	0.0301153	2.01481
WBGene00044472	dct-8	F56D6.10	0.713067	1.00949	0.139029	2.0132
WBGene00013887	nspa-5	ZC412.6	0.56226	1.00831	0.0783456	2.01155
WBGene00001483	fog-3	C03C11.2	0.540248	1.0068	0.0726707	2.00945
WBGene00022567		ZC239.4	0.733585	1.00634	0.150935	2.00881
WBGene00010460	clec-142	K01C8.8	0.60742	1.00629	0.092233	2.00874
WBGene00009349		F32H5.3	0.59465	1.00582	0.088044	2.00808
WBGene00003092	lys-3	Y22F5A.6	0.701521	1.00579	0.132205	2.00804
WBGene00014032		ZK637.15	0.611158	1.00525	0.094206	2.0073
WBGene00000435	ceh-10	W03A3.1	0.701521	1.00509	0.132013	2.00707
WBGene00017070	praf-3	D2096.2	0.275028	1.00458	0.0223131	2.00636
WBGene00016515		C38C3.7	0.596087	1.00446	0.0886278	2.00619
WBGene00013264		Y57A10A.24	0.734956	1.00432	0.152094	2.006
WBGene00018428	fbxa-183	F44E7.6	0.691688	1.00371	0.125552	2.00515
WBGene00009453		F36A2.3	0.304776	1.00154	0.0262146	2.00214
WBGene00000228	atn-1	W04D2.1	0.263353	1.00148	0.0210426	2.00205
WBGene00018352	fbxc-20	F42G2.3	0.687723	1.0014	0.124273	2.00194
WBGene00003762	nlp-24	F35B12.7	0.367955	1.00081	0.0360635	2.00112
WBGene00200456		T12B3.9	1	0.999067	0.105987	1.99871
WBGene00009293		F31D4.8	0.352712	0.999065	0.033346	1.9987
WBGene00021487	comt-3	Y40B10A.2	0.312144	0.998972	0.0272742	1.99858
WBGene00000611	col-34	F36A4.10	0.560989	0.998506	0.0780685	1.99793
WBGene00004356	rhi-1	F46H6.1	0.246038	0.998455	0.0189002	1.99786
WBGene00019179	scl-13	H10D18.4	1	0.998131	0.106172	1.99741
WBGene00195149		F26H11.8	1	0.996783	0.13245	1.99554
WBGene00196100		K10C3.8	1	0.996027	0.122671	1.9945
WBGene00077496		F11A3.4	1	0.996027	0.122671	1.9945
WBGene00043982		B0403.6	0.488911	0.994352	0.0607058	1.99219
WBGene00219729	anr-44	T09A12.7	0.736961	0.993419	0.153971	1.9909
WBGene00014154		ZK930.4	0.604041	0.993293	0.0907402	1.99072
WBGene00011266		R13H4.8	0.666843	0.992984	0.114971	1.9903
WBGene00008841		F15A4.6	0.367024	0.992814	0.0358795	1.99006
WBGene00019879		R05D3.5	0.682572	0.992209	0.121191	1.98923
WBGene00011683	phat-6	T10B10.6	0.396208	0.992179	0.0404481	1.98919
WBGene00011823		T18D3.6	0.410907	0.992167	0.0435137	1.98917
WBGene00000535	cpi-1	K08B4.6	0.326528	0.991242	0.0294995	1.9879
WBGene00000381	cct-6	F01F1.8	0.221784	0.991126	0.0159714	1.98774
WBGene00000822	csq-1	F40E10.3	0.232101	0.990281	0.0172513	1.98657
WBGene00021010		W03G1.2	0.64257	0.988971	0.105678	1.98477
WBGene00018519		F46H5.3	0.247207	0.987969	0.0190484	1.98339
WBGene00020648		T21D12.7	0.74294	0.98771	0.158548	1.98303
WBGene00011313		T01B7.8	0.709213	0.987249	0.136627	1.9824
WBGene00021793		Y52D5A.2	0.685216	0.986529	0.122386	1.98141
WBGene00015211		B0496.2	0.72046	0.986455	0.142926	1.98131
WBGene00008146		C47E8.9	0.718698	0.985178	0.141897	1.97956
WBGene00219602	linc-151	M117.14	0.740461	0.983619	0.15729	1.97742
WBGene00194935		M02G9.4	0.725872	0.983312	0.146068	1.977
WBGene00016949		C55C2.3	0.730054	0.982892	0.148781	1.97642
WBGene00010563		K04G2.4	0.548861	0.982851	0.0745576	1.97637
WBGene00003163	mdl-1	R03E9.1	0.316163	0.981998	0.0279254	1.9752
WBGene00013735		Y111B2A.12	0.253365	0.981133	0.0198554	1.97401
WBGene00012113		T28B8.1	0.482547	0.981038	0.0592235	1.97389
WBGene00021239		Y20F4.4	0.398369	0.980941	0.0408301	1.97375
WBGene00009853	arrd-27	F48F7.8	0.750051	0.980517	0.162708	1.97317
WBGene00045104		C04G2.12	0.750259	0.979686	0.162881	1.97204
WBGene00003371	mlc-3	F09F7.2	0.337208	0.979032	0.0313245	1.97114
WBGene00022884		ZK1248.17	1	0.978644	0.13912	1.97061
WBGene00022569		ZC239.6	0.463149	0.978334	0.0541222	1.97019
WBGene00008576		F08G2.4	0.359229	0.978221	0.0343503	1.97003
WBGene00009879		F49C12.10	0.558951	0.977373	0.0774326	1.96888
WBGene00044005		F37C12.18	0.589794	0.976958	0.0865064	1.96831
WBGene00006409	hdl-2	C09G9.4	0.611213	0.976625	0.0947212	1.96786
WBGene00008308		C54E10.3	1	0.975853	0.139823	1.9668
WBGene00045387		K09H9.8	0.453558	0.975632	0.0519527	1.9665
WBGene00008032		C39E9.8	0.668882	0.974795	0.115818	1.96536
WBGene00008366	tpra-1	D1046.5	0.716349	0.97476	0.141093	1.96531
WBGene00017258		F08F1.4	0.641379	0.973552	0.105132	1.96367
WBGene00022530		ZC155.2	0.696971	0.973079	0.127917	1.96303
WBGene00021079		W08A12.2	0.533757	0.972294	0.0713532	1.96196
WBGene00200160		T28B11.17	1	0.970994	0.113613	1.96019
WBGene00195424		Y48G8AL.17	1	0.970994	0.113613	1.96019
WBGene00219322		C33C12.12	0.740317	0.970725	0.15701	1.95982
WBGene00219902		F18C5.15	0.734913	0.969107	0.151678	1.95763
WBGene00000645	col-69	K01A2.7	0.722974	0.967207	0.144226	1.95505
WBGene00008366	tpra-1	D1046.5	0.39873	0.966956	0.041013	1.95471
WBGene00013647		Y105C5B.5	0.336694	0.966822	0.0312368	1.95453
WBGene00010475		K01F9.2	0.523237	0.966783	0.0686854	1.95448
WBGene00013085	mpz-6	Y51B9A.3	0.667422	0.966446	0.115368	1.95402
WBGene00022507		ZC21.8	0.720029	0.966052	0.142314	1.95349
WBGene00017396		F12A10.7	1	0.965769	0.155423	1.9531
WBGene00021632		Y47D9A.5	0.663102	0.965457	0.113559	1.95268
WBGene00022102		Y69F12A.1	0.631871	0.965028	0.101876	1.9521
WBGene00018755	bcmo-2	F53C3.12	0.419348	0.963565	0.0450962	1.95012
WBGene00196392		ZC487.7	1	0.963423	0.115718	1.94993
WBGene00017161	rabn-5	F01F1.4	0.390576	0.96328	0.0395451	1.94974
WBGene00011174	acs-23	R09E10.4	0.761682	0.962818	0.168659	1.94911
WBGene00008191		C49A1.10	0.348797	0.96252	0.0328148	1.94871
WBGene00009754		F46A9.1	0.667453	0.96241	0.115452	1.94856
WBGene00014193	nhr-247	ZK1037.5	1	0.962349	0.133625	1.94848
WBGene00003168	mec-4	T01C8.7	0.682697	0.96129	0.121518	1.94705
WBGene00020534	fbxc-49	T16A1.3	0.736961	0.96062	0.153697	1.94615
WBGene00010272	amph-1	F58G6.1	0.271329	0.959806	0.0218408	1.94505
WBGene00013739	spin-4	Y111B2A.19	0.367955	0.958838	0.0361014	1.94374
WBGene00016072		C24H12.2	0.764232	0.958449	0.171447	1.94322
WBGene00010965	ctc-2	MTCE.31	0.241059	0.958335	0.0183604	1.94307
WBGene00013055		Y50E8A.12	0.699288	0.958197	0.130585	1.94288
WBGene00023106		K11H12.t1	1	0.957172	0.14525	1.9415
WBGene00007206		B0564.6	0.589794	0.956792	0.0865903	1.94099
WBGene00007208		B0564.9	0.589794	0.956792	0.0865903	1.94099
WBGene00015782		C14F11.7	0.750893	0.956452	0.163559	1.94053
WBGene00018937		F56B6.6	0.722572	0.955526	0.143974	1.93929
WBGene00022645		ZK6.11	0.328213	0.955461	0.0299063	1.9392
WBGene00011789		T15H9.4	0.687423	0.954438	0.124021	1.93782
WBGene00016913	lam-2	C54D1.5	0.310427	0.954364	0.0270353	1.93773
WBGene00003692	nhr-102	T06C12.6	0.440312	0.954293	0.048764	1.93763
WBGene00014006		ZK596.1	0.462813	0.953564	0.0538751	1.93665
WBGene00012733		Y40B1A.2	0.701521	0.952488	0.131928	1.93521
WBGene00019151	pck-3	H04M03.1	0.655952	0.952418	0.110934	1.93511
WBGene00006509	tag-164	Y76A2A.1	0.608454	0.952054	0.0932054	1.93463
WBGene00196437		F37B12.7	1	0.950558	0.119304	1.93262
WBGene00012401	irld-57	Y6E2A.8	0.714411	0.950418	0.140441	1.93243
WBGene00018237	drd-2	F40F4.6	0.303869	0.949929	0.0260329	1.93178
WBGene00194926		K08D8.12	0.711026	0.949701	0.138102	1.93147
WBGene00020394		T10B5.8	0.597818	0.949544	0.0891514	1.93126
WBGene00020031	suco-1	R12E2.2	0.361544	0.949368	0.0347433	1.93103
WBGene00199541		Y41E3.460	0.61235	0.949287	0.0956662	1.93092
WBGene00021377		Y37E11B.5	0.279392	0.948058	0.0228213	1.92927
WBGene00000433	ceh-8	ZK265.4	0.760352	0.948042	0.167803	1.92925
WBGene00018096	clec-207	F36F12.5	1	0.947609	0.119976	1.92867
WBGene00001862	him-3	ZK381.1	0.628377	0.94736	0.100769	1.92834
WBGene00009935		F52E10.4	0.697494	0.947222	0.128943	1.92816
WBGene00045212		Y110A7A.21	0.493726	0.947215	0.0619428	1.92815
WBGene00011234		R11A5.6	0.721883	0.946885	0.143613	1.92771
WBGene00016807		C50D2.3	0.701521	0.946503	0.131944	1.9272
WBGene00010484	dph-3	K01H12.1	0.728658	0.946119	0.147236	1.92668
WBGene00018082		F36A4.3	0.649929	0.94568	0.108846	1.9261
WBGene00010242		F58D5.2	0.619389	0.944731	0.0976957	1.92483
WBGene00014164	lact-2	ZK945.1	0.364609	0.944507	0.0354423	1.92453
WBGene00013521		Y73F8A.12	0.68557	0.943258	0.122669	1.92287
WBGene00021352		Y37E3.11	0.57961	0.942767	0.0834793	1.92221
WBGene00021352		Y37E3.11	0.57961	0.942767	0.0834793	1.92221
WBGene00012127		T28D6.7	0.334437	0.942135	0.03071	1.92137
WBGene00019327	zip-2	K02F3.4	0.292793	0.942032	0.0244891	1.92123
WBGene00007439		C08E8.3	0.772226	0.941855	0.179802	1.921
WBGene00019100		F59B1.8	0.445675	0.940964	0.0499406	1.91981
WBGene00000771	cpb-2	C30B5.3	0.676006	0.940554	0.118152	1.91927
WBGene00021072		W07B8.4	0.771339	0.940513	0.179451	1.91921
WBGene00206522		F14D2.19	0.597185	0.939483	0.0889508	1.91784
WBGene00009974		F53C11.4	0.305201	0.93775	0.0262874	1.91554
WBGene00007537	fipr-8	C12D8.6	0.676599	0.937066	0.119201	1.91463
WBGene00004945	sop-2	C50E10.4	0.313522	0.936457	0.0274876	1.91382
WBGene00010133		F55H12.2	0.416928	0.935012	0.0446903	1.91191
WBGene00016780		C49G7.1	0.725872	0.934027	0.146012	1.9106
WBGene00015305		C01G5.3	0.730054	0.933799	0.148714	1.9103
WBGene00013148		Y53F4A.2	0.713443	0.933725	0.139828	1.9102
WBGene00017775		F25B5.3	0.637049	0.933494	0.103528	1.9099
WBGene00022615		ZC449.5	0.316505	0.932588	0.0279807	1.9087
WBGene00010883		M7.7	0.664908	0.932223	0.114144	1.90821
WBGene00020887		T28B4.4	0.621448	0.932122	0.0986359	1.90808
WBGene00015422		C04E6.5	0.677605	0.931662	0.119489	1.90747
WBGene00007180		B0457.6	0.463087	0.93164	0.0540332	1.90744
WBGene00022493	mrpl-45	Y119D3B.16	0.36009	0.93161	0.0344967	1.9074
WBGene00007551		C13C4.7	0.686418	0.931211	0.123263	1.90688
WBGene00019459		K06H7.8	0.697494	0.9312	0.128937	1.90686
WBGene00000719	col-146	T06E4.6	0.694256	0.930351	0.126428	1.90574
WBGene00009250		F29D10.1	0.741281	0.930348	0.157813	1.90574
WBGene00021933		Y55F3AR.2	0.298649	0.930081	0.0253864	1.90538
WBGene00022094		Y69A2AR.23	0.726203	0.929572	0.146421	1.90471
WBGene00015165		B0361.11	0.700931	0.929349	0.13122	1.90442
WBGene00009585	cal-7	F40F9.8	1	0.928901	0.14568	1.90383
WBGene00022699		ZK353.3	0.710128	0.928629	0.137162	1.90347
WBGene00005511	srh-307	Y59A8B.5	1	0.927703	0.170487	1.90224
WBGene00018731		F53A9.8	0.619916	0.926651	0.0979259	1.90086
WBGene00021733	otub-2	Y50C1A.1	0.334653	0.925877	0.0308564	1.89984
WBGene00000782	cpr-2	F36D3.9	1	0.925465	0.145115	1.8993
WBGene00000378	cct-2	T21B10.7	0.26255	0.924884	0.0209629	1.89853
WBGene00044280		W02A2.9	0.702786	0.92437	0.132894	1.89785
WBGene00011298		R107.2	0.409281	0.924185	0.0432394	1.89761
WBGene00016784		C49G7.6	1	0.923834	0.147242	1.89715
WBGene00000625	col-48	Y54E10BL.2	0.736961	0.923208	0.154066	1.89633
WBGene00015458		C04G6.10	0.748735	0.923206	0.16229	1.89632
WBGene00015666	gad-2	C10A4.5	0.709213	0.922808	0.136291	1.8958
WBGene00018975		F56E10.1	0.492621	0.922355	0.0616416	1.89521
WBGene00016239		C30A5.4	0.731452	0.92226	0.149669	1.89508
WBGene00202194		R13A5.16	1	0.919829	0.14547	1.89189
WBGene00019530	scrm-8	K08D10.7	0.676006	0.917646	0.118424	1.88903
WBGene00196098		Y55F3AR.4	1	0.916816	0.129432	1.88794
WBGene00195666		C34E11.9	1	0.916432	0.129559	1.88744
WBGene00008231	tag-329	C50F4.3	0.752131	0.916422	0.164008	1.88743
WBGene00017475		F14H12.8	0.700931	0.916314	0.131288	1.88729
WBGene00015064		B0228.7	0.492569	0.914334	0.0615931	1.8847
WBGene00007381		C06C6.7	0.730054	0.914034	0.148617	1.88431
WBGene00019436		K06A9.2	0.611414	0.914016	0.0950686	1.88428
WBGene00012755		Y41C4A.8	0.602709	0.913894	0.0902741	1.88412
WBGene00016894		C53B7.3	0.406395	0.913697	0.0425017	1.88387
WBGene00017225	fbxa-52	F07G6.6	0.785238	0.913044	0.186314	1.88301
WBGene00018049	clec-138	F35D11.9	1	0.912999	0.151196	1.88296
WBGene00018024		F35A5.1	0.398369	0.912985	0.0408272	1.88294
WBGene00009401		F35C11.2	0.713173	0.912909	0.139528	1.88284
WBGene00044206		T26H5.9	0.721503	0.912884	0.143419	1.88281
WBGene00012971		Y48A6B.10	0.407677	0.912343	0.042949	1.8821
WBGene00011241	mpz-5	R11A8.8	0.64257	0.912274	0.105651	1.88201
WBGene00011617		T08G3.4	0.696971	0.912095	0.127774	1.88178
WBGene00022267		Y73C8C.10	1	0.911976	0.130902	1.88162
WBGene00011544		T06E8.2	1	0.911976	0.130902	1.88162
WBGene00202355		M176.15	1	0.911976	0.130902	1.88162
WBGene00018525		F47B3.1	0.662833	0.911852	0.113415	1.88146
WBGene00013705		Y106G6E.1	0.781342	0.911383	0.184189	1.88085
WBGene00200154		F37B12.11	1	0.911095	0.131203	1.88047
WBGene00018745		F53C3.1	0.697494	0.910251	0.129049	1.87937
WBGene00018645		F49F1.5	0.741281	0.910214	0.1579	1.87932
WBGene00010006		F53H2.3	0.710128	0.909641	0.137401	1.87858
WBGene00000247	bec-1	T19E7.3	0.41667	0.909619	0.0445324	1.87855
WBGene00019388		K04F1.9	0.594655	0.909389	0.0881257	1.87825
WBGene00000224	atgp-1	F26D10.9	0.391775	0.908717	0.0398328	1.87738
WBGene00021052		W06A11.1	0.734913	0.907855	0.151865	1.87625
WBGene00013862	wdr-5.3	ZC302.2	0.649929	0.907506	0.108911	1.8758
WBGene00004855	sma-1	R31.1	0.413007	0.907192	0.043829	1.87539
WBGene00009226	cyp-37B1	F28G4.1	0.782175	0.90712	0.184698	1.8753
WBGene00008943	srz-36	F19B2.4	0.770182	0.906909	0.177645	1.87502
WBGene00016040		C24A11.1	0.687432	0.906575	0.124128	1.87459
WBGene00201755		C37A2.9	1	0.906316	0.170185	1.87425
WBGene00007374		C06C3.3	0.770182	0.905941	0.177442	1.87377
WBGene00022632		ZC581.2	0.733585	0.905914	0.150876	1.87373
WBGene00006649	tth-1	F08F1.8	0.410907	0.905753	0.0435331	1.87352
WBGene00004118	pqn-29	F10F2.9	0.752233	0.905597	0.164256	1.87332
WBGene00011669		T09F5.10	0.710128	0.904482	0.137186	1.87187
WBGene00020105		R148.7	0.667144	0.904174	0.115164	1.87147
WBGene00010779		K11H3.2	0.703746	0.902636	0.133888	1.86948
WBGene00017304		F09F7.7	0.359484	0.902479	0.0343959	1.86928
WBGene00010226		F58A4.1	0.790765	0.902255	0.19273	1.86898
WBGene00008460		E02H4.2	0.734913	0.902012	0.151496	1.86867
WBGene00200953		T22C1.15	1	0.901051	0.134284	1.86743
WBGene00023283		F40H7.6	1	0.901051	0.134284	1.86743
WBGene00202122		F29G9.17	1	0.900669	0.134453	1.86693
WBGene00016496		C37C3.2	0.334653	0.900588	0.0308606	1.86683
WBGene00001132	alp-1	T11B7.4	0.450686	0.900005	0.0513837	1.86607
WBGene00015994		C18H7.4	0.69861	0.899941	0.12975	1.86599
WBGene00011438		T04F3.3	0.67626	0.8995	0.118898	1.86542
WBGene00017791	try-8	F25E5.10	0.797403	0.898783	0.200746	1.86449
WBGene00008584		F08G5.6	0.376812	0.898611	0.0374622	1.86427
WBGene00001564	icl-1	C05E4.9	0.649929	0.898003	0.108947	1.86348
WBGene00008832	obr-2	F14H8.1	0.591762	0.8978	0.0871708	1.86322
WBGene00022628		ZC513.3	0.723938	0.897698	0.145062	1.86309
WBGene00010906		M88.3	0.700016	0.89697	0.130916	1.86215
WBGene00003588	nex-1	ZC155.1	0.368294	0.896953	0.0361784	1.86213
WBGene00220046		R31.7	1	0.896745	0.156793	1.86186
WBGene00020978		W03B1.9	0.763422	0.896266	0.170364	1.86124
WBGene00020085		R106.1	0.794984	0.896044	0.198439	1.86096
WBGene00008465		E03A3.5	0.790962	0.895702	0.193441	1.86052
WBGene00014046	clec-60	ZK666.6	0.794984	0.895336	0.197692	1.86004
WBGene00011185		R10D12.1	0.66641	0.895235	0.114797	1.85991
WBGene00015331		C02B10.6	0.752233	0.895214	0.164297	1.85989
WBGene00044474		F56D6.12	0.764232	0.894761	0.17097	1.8593
WBGene00198962		C14F11.20	1	0.89462	0.136152	1.85912
WBGene00020058		R13D11.4	0.486656	0.894135	0.060334	1.8585
WBGene00018169	nspb-2	F38A5.12	0.719622	0.893951	0.142191	1.85826
WBGene00001922	his-48	B0035.8	0.664908	0.893491	0.114104	1.85767
WBGene00017120	tctn-1	E04A4.6	0.747339	0.893443	0.161411	1.8576
WBGene00020686		T22D1.8	0.730737	0.893309	0.149322	1.85743
WBGene00013590		Y81G3A.1	0.692593	0.893129	0.125849	1.8572
WBGene00013136		Y53C10A.5	0.345863	0.893028	0.0324567	1.85707
WBGene00006584	tni-1	F42E11.4	0.604041	0.892403	0.0908308	1.85627
WBGene00013400		Y62H9A.12	0.70551	0.892228	0.134967	1.85604
WBGene00018602		F48D6.4	0.477286	0.891774	0.05787	1.85546
WBGene00017353		F10E9.1	0.771339	0.891595	0.179424	1.85523
WBGene00012379		Y1A5A.1	0.740317	0.890957	0.156976	1.85441
WBGene00050917		Y53G8AL.4	0.800081	0.890955	0.202749	1.8544
WBGene00004017	phg-1	F27E5.4	0.762777	0.890806	0.169403	1.85421
WBGene00021639		Y47G6A.13	0.676599	0.890596	0.119188	1.85394
WBGene00045038		F13G11.3	0.490972	0.890483	0.0612186	1.8538
WBGene00011590	bus-19	T07F10.4	0.699573	0.890027	0.130719	1.85321
WBGene00007390	lmtr-3	C06H2.6	0.789844	0.889782	0.19155	1.8529
WBGene00022634		ZC581.7	0.709213	0.889482	0.136689	1.85251
WBGene00023326		M03D4.5	0.773659	0.889362	0.180404	1.85236
WBGene00000508	cit-1.2	F44B9.3	0.332719	0.889264	0.030493	1.85223
WBGene00021700		Y48G9A.6	0.803577	0.888826	0.205791	1.85167
WBGene00012333	sre-43	W07G1.6	0.803577	0.888569	0.205876	1.85134
WBGene00008821	best-12	F14H3.2	0.750761	0.888217	0.163486	1.85089
WBGene00014121		ZK858.8	0.655694	0.88817	0.110568	1.85083
WBGene00023493	nspc-12	F42F12.10	0.794984	0.887896	0.19867	1.85047
WBGene00012010		T25B9.4	0.710339	0.887238	0.137745	1.84963
WBGene00016946		C55B7.10	0.723038	0.887196	0.144282	1.84958
WBGene00012294	nspa-8	W06A7.5	0.667453	0.887124	0.115431	1.84949
WBGene00011880		T21B6.3	0.462981	0.886859	0.0539733	1.84915
WBGene00011733		T12D8.5	0.476578	0.88609	0.0574716	1.84816
WBGene00020826		T26A8.3	1	0.885851	0.15902	1.84785
WBGene00044954		D2096.14	1	0.885851	0.15902	1.84785
WBGene00006820	unc-89	C09D1.1	0.476059	0.885584	0.0572694	1.84751
WBGene00009549		F38H4.5	0.662833	0.885399	0.113283	1.84728
WBGene00015925		C17H11.5	0.798239	0.885221	0.201265	1.84705
WBGene00017127		E04F6.8	0.445675	0.885132	0.050153	1.84693
WBGene00020755	grl-31	T24A6.19	0.797023	0.884911	0.200227	1.84665
WBGene00013619	fbxa-112	Y102A5C.13	1	0.884887	0.181207	1.84662
WBGene00022453		Y110A2AR.3	0.406395	0.884612	0.0425342	1.84627
WBGene00201966		C37H5.16	1	0.88451	0.139609	1.84614
WBGene00002011	hsp-12.2	C14B9.1	0.473584	0.884166	0.0562975	1.8457
WBGene00015026		B0207.1	0.72046	0.884146	0.142639	1.84567
WBGene00002212	kin-31	B0523.1	0.711026	0.883947	0.138142	1.84542
WBGene00018522		F46H5.7	0.353632	0.8834	0.0335844	1.84472
WBGene00003593	nfm-1	F42A10.2	0.45018	0.883345	0.0512454	1.84465
WBGene00019226		H22K11.3	0.797023	0.883117	0.200267	1.84436
WBGene00011134	ssp-33	R08A2.3	0.616572	0.882808	0.0968126	1.84396
WBGene00019843		R03E9.2	0.618117	0.882705	0.0973205	1.84383
WBGene00003766	nlp-28	B0213.3	0.444763	0.882596	0.0497054	1.84369
WBGene00002219	klp-7	K11D9.1	0.338206	0.881784	0.0314773	1.84265
WBGene00013839	fbxa-32	ZC47.6	0.682572	0.881758	0.121347	1.84262
WBGene00009850		F48F7.5	0.626705	0.881237	0.100002	1.84195
WBGene00015278		C01B10.3	0.453538	0.881214	0.0518429	1.84192
WBGene00006980	zig-3	C14F5.2	0.70317	0.880034	0.133104	1.84042
WBGene00219654	linc-156	C30F8.7	1	0.87999	0.171095	1.84036
WBGene00014698		C37A5.3	0.787342	0.879418	0.187707	1.83963
WBGene00010269		F58G1.7	0.686876	0.878997	0.123498	1.8391
WBGene00008772	irld-4	F13G11.2	0.734913	0.878898	0.151593	1.83897
WBGene00022419		Y102A11A.9	0.694499	0.878255	0.126602	1.83815
WBGene00018398	sptl-2	F43H9.2	0.502541	0.877082	0.0636747	1.83666
WBGene00014157		ZK930.7	0.736961	0.876771	0.153293	1.83626
WBGene00023468		B0412.6	1	0.876176	0.198811	1.8355
WBGene00007882		C33A12.3	0.767547	0.876176	0.174582	1.8355
WBGene00016410		C34E10.9	0.709213	0.876166	0.136388	1.83549
WBGene00005005	spp-20	K04A8.8	0.782731	0.875664	0.185027	1.83485
WBGene00194869		K01A6.8	0.764009	0.875637	0.170812	1.83482
WBGene00000522	clc-1	C09F12.1	0.618117	0.875552	0.0973485	1.83471
WBGene00021287		Y24D9B.1	0.721945	0.875359	0.143721	1.83446
WBGene00022161		Y71G12B.26	0.761631	0.87528	0.168443	1.83436
WBGene00000220	atf-2	K08F8.2	0.743972	0.875078	0.159315	1.83411
WBGene00011608		T08D2.3	0.419498	0.874796	0.045345	1.83375
WBGene00043997		Y79H2A.12	0.809308	0.874555	0.212289	1.83344
WBGene00021968		Y57G7A.5	0.697629	0.874209	0.129321	1.833
WBGene00020841		T27A3.5	0.730737	0.873564	0.149329	1.83218
WBGene00018496		F46F5.5	1	0.873052	0.194282	1.83153
WBGene00004145	pqn-62	T03G11.1	0.4736	0.872804	0.0565243	1.83122
WBGene00011171		R09E10.1	0.644093	0.872561	0.106677	1.83091
WBGene00017971		F32A5.8	0.466179	0.872512	0.0547866	1.83085
WBGene00018176		F38B6.7	0.80816	0.872094	0.211645	1.83032
WBGene00013838	fbxa-31	ZC47.5	0.615302	0.871915	0.0962846	1.83009
WBGene00000599	col-10	B0222.8	0.771339	0.871828	0.179358	1.82998
WBGene00000636	col-60	F22D6.10	0.743886	0.871439	0.159253	1.82949
WBGene00017705		F22E5.6	1	0.871297	0.200715	1.82931
WBGene00002273	lec-10	W01A11.4	0.361259	0.870906	0.0346944	1.82881
WBGene00044229		T03F6.8	0.778473	0.870689	0.182681	1.82854
WBGene00007555	dohh-1	C14A4.1	0.353932	0.870494	0.0336961	1.82829
WBGene00003934	pat-10	F54C1.7	0.429285	0.870052	0.0469825	1.82773
WBGene00219876		F01G12.19	0.809756	0.869973	0.214729	1.82763
WBGene00013279		Y57A10B.7	0.736961	0.86992	0.154217	1.82756
WBGene00010761		K10H10.5	0.807184	0.869333	0.208569	1.82682
WBGene00020370		T08H10.3	0.718698	0.868556	0.141923	1.82583
WBGene00012402	sfxn-1.3	Y6E2A.9	0.769323	0.867077	0.176188	1.82396
WBGene00015973		C18E3.4	0.787342	0.866781	0.18781	1.82359
WBGene00007633		C16D2.1	0.740201	0.866545	0.156635	1.82329
WBGene00201964		F25D1.11	0.812331	0.864811	0.218038	1.8211
WBGene00044501		C55C3.8	0.790962	0.864719	0.193301	1.82099
WBGene00015250		B0546.3	0.405339	0.86457	0.042294	1.8208
WBGene00009544		F38E11.9	0.608306	0.863602	0.0927001	1.81958
WBGene00013489	col-42	Y69H2.14	0.35302	0.862663	0.0334493	1.81839
WBGene00013707		Y106G6E.3	0.791687	0.86235	0.194273	1.818
WBGene00006244	str-211	C02E7.13	1	0.862191	0.188929	1.8178
WBGene00044272	nspa-4	H12D21.13	0.67877	0.862169	0.119877	1.81777
WBGene00005982	srx-91	H12C20.4	1	0.862162	0.199514	1.81776
WBGene00020482		T13C2.7	0.770749	0.861936	0.178941	1.81748
WBGene00006416	sams-5	T13A10.11	0.600258	0.861852	0.0895908	1.81737
WBGene00012731		Y39G8C.2	0.755351	0.861851	0.165382	1.81737
WBGene00011929		T22G5.1	1	0.861236	0.147305	1.81659
WBGene00012969		Y48A6B.8	0.772894	0.860974	0.180134	1.81626
WBGene00012482	clec-106	Y18D10A.12	1	0.860938	0.170999	1.81622
WBGene00003124	mai-1	K10B3.9	0.523731	0.860831	0.0688591	1.81608
WBGene00219629	linc-87	Y75B8A.61	0.736961	0.860432	0.154106	1.81558
WBGene00235367		F49F1.17	1	0.859876	0.147878	1.81488
WBGene00012627		Y38H6C.15	0.732048	0.858745	0.150062	1.81346
WBGene00018764		F53F10.2	0.350227	0.857968	0.0329702	1.81248
WBGene00013158		Y53F4B.11	0.776859	0.857962	0.181749	1.81248
WBGene00196470		R05D3.13	1	0.857646	0.148623	1.81208
WBGene00201660		R03E9.10	1	0.857646	0.148623	1.81208
WBGene00014660		B0457.3	0.770182	0.856967	0.177483	1.81123
WBGene00199883		F10C2.12	1	0.856891	0.1489	1.81113
WBGene00003449	msp-56	K07F5.3	0.62087	0.85654	0.098224	1.81069
WBGene00009702		F44F4.3	0.725308	0.855704	0.145701	1.80964
WBGene00018792		F54C1.8	0.744477	0.855703	0.159817	1.80964
WBGene00008862		F15D4.5	0.736837	0.855009	0.153111	1.80877
WBGene00000294	cas-1	F41G4.2	0.368508	0.854649	0.0362437	1.80832
WBGene00012875		Y45F10B.13	0.543002	0.854526	0.0731819	1.80816
WBGene00022033		Y65B4BL.1	0.817609	0.854419	0.223771	1.80803
WBGene00044810		Y37E3.19	0.792364	0.8538	0.195019	1.80726
WBGene00020020		R12B2.6	1	0.853748	0.192798	1.80719
WBGene00010880		M05D6.8	0.815411	0.85329	0.222147	1.80662
WBGene00219332		Y116A8C.467	0.817609	0.853155	0.223778	1.80645
WBGene00005650	srp-9	F09C6.5	0.815332	0.853125	0.221945	1.80641
WBGene00020195		T03G6.3	0.446616	0.85299	0.050459	1.80624
WBGene00012207		W02B12.12	0.696997	0.852613	0.12818	1.80577
WBGene00022670		ZK177.2	0.791836	0.852351	0.194694	1.80544
WBGene00015917		C17G10.3	0.730054	0.851762	0.147861	1.8047
WBGene00013983		ZK512.2	0.390576	0.851563	0.0394984	1.80446
WBGene00020120		R160.3	0.628377	0.851096	0.100982	1.80387
WBGene00012676	pro-3	Y39B6A.14	0.406724	0.850463	0.0426556	1.80308
WBGene00022495	fbxa-78	Y119D3B.19	0.809566	0.850365	0.212692	1.80296
WBGene00011173	acs-18	R09E10.3	0.708054	0.850128	0.135916	1.80266
WBGene00018744		F53B3.6	0.665161	0.849693	0.114375	1.80212
WBGene00197723		Y69A2AR.39	1	0.849515	0.151392	1.80189
WBGene00006966	xtr-2	F17A2.1	1	0.849515	0.151392	1.80189
WBGene00006137	str-77	W06D12.4	1	0.849515	0.151392	1.80189
WBGene00000677	col-103	F56B3.1	0.35302	0.849183	0.0334634	1.80148
WBGene00018153		F37C12.10	0.702786	0.848995	0.132813	1.80125
WBGene00002103	ins-20	ZK84.7	1	0.84878	0.188039	1.80098
WBGene00198873		F10C2.11	1	0.84877	0.151691	1.80096
WBGene00004084	pph-2	C29E6.3	0.747558	0.848561	0.161648	1.8007
WBGene00006819	unc-87	F08B6.4	0.448613	0.848498	0.0509339	1.80063
WBGene00010262	droe-4	F58E10.7	0.60414	0.848268	0.0912958	1.80034
WBGene00010506		K02E2.1	0.820254	0.848172	0.227346	1.80022
WBGene00020615		T20D4.9	0.806227	0.847435	0.207496	1.7993
WBGene00020732		T23E7.2	0.401554	0.847416	0.0415119	1.79928
WBGene00003933	pat-9	T27B1.2	0.622972	0.846966	0.0993315	1.79871
WBGene00020954		W02G9.4	0.477286	0.846564	0.0578479	1.79821
WBGene00011548		T06G6.6	0.802561	0.845791	0.205234	1.79725
WBGene00002193	kin-5	T13H10.1	0.725872	0.845433	0.146096	1.7968
WBGene00010897	lact-3	M28.6	0.403714	0.844668	0.0418371	1.79585
WBGene00009458		F36A2.11	0.734956	0.844656	0.152174	1.79584
WBGene00010587	sol-2	K05C4.11	0.709213	0.844131	0.136727	1.79518
WBGene00010228	clec-161	F58A4.5	0.80816	0.843973	0.211249	1.79499
WBGene00000715	col-142	T15B7.4	0.453538	0.843707	0.0518387	1.79466
WBGene00009526	clec-169	F38A1.14	0.733668	0.843053	0.151059	1.79384
WBGene00011248		R11D1.10	0.49716	0.843005	0.06258	1.79378
WBGene00017736		F23C8.7	0.701521	0.842534	0.131676	1.7932
WBGene00016193		C28H8.2	0.765254	0.842507	0.172209	1.79316
WBGene00255441		T11G6.11	0.819932	0.841812	0.226265	1.7923
WBGene00010659		K08D8.5	0.644171	0.841415	0.107045	1.79181
WBGene00003827	ntl-4	C49H3.5	0.462813	0.841221	0.0538447	1.79157
WBGene00045468		F08A8.8	0.781808	0.840863	0.184397	1.79112
WBGene00011394		T03D8.7	0.809756	0.840542	0.214954	1.79072
WBGene00018981		F56F4.4	0.821357	0.840144	0.229609	1.79023
WBGene00012467	arrd-8	Y17G7B.14	0.822055	0.839218	0.232258	1.78908
WBGene00012592		Y38E10A.14	0.517526	0.83915	0.0673024	1.789
WBGene00004903	snf-4	Y46G5A.25	0.770749	0.838779	0.178719	1.78854
WBGene00219805		C07A12.19	1	0.838342	0.219181	1.78799
WBGene00009948		F52H3.6	0.707824	0.838333	0.135829	1.78798
WBGene00018968		F56D2.8	1	0.838298	0.177793	1.78794
WBGene00018526		F47B3.2	0.763325	0.8378	0.170161	1.78732
WBGene00013331		Y57G11C.42	0.737404	0.83722	0.154721	1.7866
WBGene00016129		C26B2.7	0.489348	0.837198	0.0608419	1.78658
WBGene00020531		T15B12.2	0.743886	0.836847	0.159194	1.78614
WBGene00011304	mnk-1	R166.5	0.422122	0.836832	0.0459231	1.78612
WBGene00021109		W09C3.1	0.759575	0.836311	0.167253	1.78548
WBGene00007190	rmd-3	B0491.3	0.686418	0.836167	0.123334	1.7853
WBGene00007392	fbxa-156	C06H5.1	0.608454	0.835779	0.0929906	1.78482
WBGene00006820	unc-89	C09D1.1	0.47996	0.835562	0.0586782	1.78455
WBGene00016136		C26B9.7	0.822055	0.8354	0.232794	1.78435
WBGene00201423		ZK546.20	1	0.835042	0.156494	1.78391
WBGene00235163		Y108G3AL.10	1	0.835042	0.156494	1.78391
WBGene00013637		Y105C5A.13	0.809756	0.834969	0.215391	1.78382
WBGene00006051	ssq-2	T28H11.5	0.709213	0.834293	0.136581	1.78298
WBGene00016825		C50E10.1	0.730328	0.834219	0.149072	1.78289
WBGene00003370	mlc-2	C36E6.5	0.534675	0.834139	0.0715405	1.78279
WBGene00201578		M04B2.12	1	0.834066	0.156778	1.7827
WBGene00008853	clec-101	F15D3.2	1	0.834066	0.156778	1.7827
WBGene00001931	his-57	F54E12.5	0.812641	0.83358	0.218457	1.7821
WBGene00010155		F56F3.4	0.714377	0.833219	0.140269	1.78166
WBGene00021055		W06A11.4	0.697494	0.833001	0.128375	1.78139
WBGene00018158	comp-1	F37E3.3	0.725982	0.832745	0.146161	1.78107
WBGene00011612		T08D2.7	0.676006	0.832585	0.118036	1.78087
WBGene00009031		F21H7.5	0.695407	0.832537	0.127102	1.78081
WBGene00003369	mlc-1	C36E6.3	0.525299	0.832532	0.069238	1.78081
WBGene00017817		F26B1.5	0.806227	0.832473	0.207357	1.78073
WBGene00009584	drap-1	F40F9.7	0.41667	0.832464	0.0446012	1.78072
WBGene00045386		C02B4.4	0.80046	0.832398	0.203234	1.78064
WBGene00007563		C14A4.13	0.764232	0.832312	0.171114	1.78054
WBGene00200884		F25D1.10	0.825077	0.832301	0.23517	1.78052
WBGene00011294		R102.7	0.815332	0.832087	0.221909	1.78026
WBGene00001385	far-1	F02A9.2	0.449178	0.831904	0.0510248	1.78003
WBGene00021792		Y52D5A.1	0.789844	0.831542	0.19064	1.77959
WBGene00018170	nspb-1	F38A5.14	0.762366	0.831197	0.169043	1.77916
WBGene00020009		R11F4.3	0.682572	0.831177	0.121297	1.77914
WBGene00219767	linc-131	Y71G12B.40	0.766243	0.831145	0.173129	1.7791
WBGene00022700		ZK353.4	0.772226	0.831029	0.179843	1.77895
WBGene00021207		Y18H1A.1	0.735471	0.830997	0.152521	1.77891
WBGene00009090	fipr-3	F23D12.6	0.730054	0.830739	0.148167	1.7786
WBGene00008950	wht-5	F19B6.4	0.740875	0.830621	0.157493	1.77845
WBGene00008010		C38D9.2	0.815411	0.83052	0.222136	1.77833
WBGene00011817		T16H12.9	0.696997	0.829904	0.128211	1.77757
WBGene00002087	ins-4	ZK75.1	0.740201	0.829819	0.156428	1.77746
WBGene00001951	hlh-4	T05G5.2	0.822055	0.82973	0.232561	1.77735
WBGene00013482		Y69H2.7	0.520124	0.829381	0.0678463	1.77692
WBGene00195159		T04C12.14	0.825646	0.829072	0.237522	1.77654
WBGene00015572		C07G1.6	0.711026	0.829038	0.138173	1.7765
WBGene00007247		C01G12.7	0.810317	0.828678	0.21668	1.77606
WBGene00044756		F58F12.4	0.733209	0.828143	0.150704	1.7754
WBGene00008007		C38D4.7	0.676006	0.828119	0.118257	1.77537
WBGene00017901	igeg-1	F28E10.2	0.576846	0.828047	0.0827731	1.77528
WBGene00011491		T05F1.5	0.724732	0.827909	0.145488	1.77511
WBGene00010050		F54D5.4	0.473226	0.82771	0.0562268	1.77487
WBGene00007763		C27B7.6	0.769323	0.827657	0.175693	1.7748
WBGene00206361		K02G10.15	0.807245	0.827599	0.20918	1.77473
WBGene00006710	ubc-15	Y110A2AR.2	0.523235	0.827294	0.0685998	1.77435
WBGene00016448		C35D10.12	0.770749	0.827281	0.178776	1.77434
WBGene00018124		F36H12.10	0.701521	0.82719	0.132168	1.77423
WBGene00020808	clik-1	T25F10.6	0.506622	0.826913	0.0647927	1.77389
WBGene00021930		Y55F3AM.13	0.419498	0.82691	0.0452412	1.77388
WBGene00006627	tsp-1	C02F5.8	0.810317	0.826593	0.216543	1.77349
WBGene00018741	comt-1	F53B3.2	0.821609	0.826443	0.230415	1.77331
WBGene00010810		M01F1.4	0.479158	0.825998	0.0582959	1.77276
WBGene00007932	zip-5	C34D1.5	0.740317	0.824938	0.157019	1.77146
WBGene00013595	atg-4.1	Y87G2A.3	0.463149	0.824881	0.0541535	1.77139
WBGene00018510		F46F11.7	0.575918	0.824858	0.0825034	1.77136
WBGene00016073		C24H12.4	0.407431	0.824465	0.0428748	1.77088
WBGene00007542		C12D8.15	1	0.824286	0.184641	1.77066
WBGene00017741		F23C8.13	0.787342	0.823959	0.188078	1.77026
WBGene00001666	gpa-4	T07A9.7	0.790443	0.823808	0.19243	1.77007
WBGene00018163		F38A5.6	0.792364	0.823777	0.195402	1.77003
WBGene00012219		W03C9.1	0.776766	0.823725	0.181589	1.76997
WBGene00003097	lys-8	C17G10.5	0.450686	0.82341	0.051365	1.76958
WBGene00021471		Y39G10AR.15	0.746775	0.823405	0.160982	1.76958
WBGene00023382		Y57E12AL.3	0.508867	0.823014	0.0653516	1.7691
WBGene00010041		F54C9.3	0.466179	0.822717	0.05474	1.76873
WBGene00006048	ssp-31	ZK1225.6	0.699288	0.822308	0.130409	1.76823
WBGene00019944		R07G3.8	0.626987	0.82221	0.100084	1.76811
WBGene00016898		C53C9.2	0.604041	0.82158	0.0908805	1.76734
WBGene00017471		F14H12.3	0.52676	0.821569	0.0696402	1.76733
WBGene00021445		Y39A3CR.5	0.773155	0.820714	0.180241	1.76628
WBGene00021908		Y55B1AR.4	0.765264	0.820057	0.172506	1.76548
WBGene00003763	nlp-25	Y43F8C.1	0.807245	0.819867	0.209353	1.76524
WBGene00012683	asp-17	Y39B6A.24	0.709213	0.819779	0.136608	1.76514
WBGene00016763		C49A9.9	0.762777	0.819755	0.169355	1.76511
WBGene00015630		C09B9.7	0.78819	0.819369	0.188515	1.76463
WBGene00013749		Y113G7A.12	0.825646	0.818926	0.237539	1.76409
WBGene00022753		ZK484.7	0.770182	0.818619	0.177773	1.76372
WBGene00044633		F54H12.7	0.736517	0.818548	0.152869	1.76363
WBGene00000698	col-124	C24F3.6	0.400186	0.818509	0.0412815	1.76358
WBGene00001544	gcy-19	C17F4.6	0.791687	0.818494	0.194311	1.76356
WBGene00010791	sodh-2	K12G11.4	1	0.81848	0.187021	1.76355
WBGene00194832		Y73B6BL.270	0.828743	0.81799	0.242645	1.76295
WBGene00004053	tank-1	ZK1005.1	0.483961	0.817986	0.0594832	1.76294
WBGene00003594	nft-1	Y56A3A.13	0.447772	0.817905	0.0507853	1.76284
WBGene00006038	ssp-9	E03H12.10	0.685903	0.817846	0.122834	1.76277
WBGene00013159		Y53F4B.12	0.713173	0.817804	0.13931	1.76272
WBGene00014148		ZK909.3	0.760208	0.817461	0.167708	1.7623
WBGene00020036		R12E2.11	0.419498	0.817209	0.0454143	1.76199
WBGene00020599		T20B6.3	0.781342	0.817153	0.184077	1.76193
WBGene00008013		C38D9.5	0.798239	0.816341	0.201508	1.76093
WBGene00006719	ubc-24	F49E12.4	0.789844	0.816004	0.191259	1.76052
WBGene00008175		C48B4.12	0.749203	0.815962	0.162435	1.76047
WBGene00013310		Y57G11C.14	0.732202	0.815831	0.150323	1.76031
WBGene00017737		F23C8.8	0.769323	0.815599	0.176274	1.76003
WBGene00017764		F25A2.1	0.825646	0.81455	0.237717	1.75875
WBGene00022511		ZC53.4	1	0.814464	0.163912	1.75865
WBGene00194886		C05B5.12	0.825943	0.814443	0.238143	1.75862
WBGene00011883	mrpl-50	T21B10.1	0.440312	0.814404	0.0487635	1.75857
WBGene00000013	abf-2	C50F2.10	0.822055	0.814023	0.233011	1.75811
WBGene00008487		F01D4.3	0.789844	0.813854	0.191812	1.7579
WBGene00020860	nspd-10	T27C10.7	0.701521	0.813474	0.132317	1.75744
WBGene00017834		F26F12.3	0.404728	0.813444	0.0421567	1.7574
WBGene00015230	tag-344	B0511.4	0.764526	0.813432	0.171789	1.75739
WBGene00006587	tnt-2	F53A9.10	0.488911	0.81317	0.0606735	1.75707
WBGene00018127		F36H12.14	0.792364	0.812635	0.195529	1.75642
WBGene00014223		ZK1098.6	0.736961	0.812316	0.153746	1.75603
WBGene00020456	fbxa-60	T12B5.10	0.51102	0.812237	0.0658403	1.75593
WBGene00021791		Y51H7C.13	0.789844	0.811748	0.191707	1.75534
WBGene00007234		C01G10.7	0.509366	0.81154	0.0655356	1.75508
WBGene00021368	best-20	Y37E11AR.1	0.575925	0.811518	0.0825546	1.75506
WBGene00044646		B0205.14	0.826789	0.811349	0.239199	1.75485
WBGene00012136		T28F4.1	0.502169	0.811145	0.0635694	1.7546
WBGene00015092	mrpl-47	B0261.4	0.443084	0.81081	0.0493338	1.7542
WBGene00022890	fbxa-224	ZK1290.9	0.781152	0.810718	0.183773	1.75408
WBGene00001779	gst-31	Y53F4B.35	0.813202	0.810643	0.219474	1.75399
WBGene00019090		F59A7.2	0.687423	0.810026	0.124044	1.75324
WBGene00013845	fbxa-37	ZC47.14	0.710409	0.809905	0.137807	1.7531
WBGene00009005		F21C3.6	0.792049	0.809636	0.194841	1.75277
WBGene00000066	act-4	M03F4.2	0.51856	0.808699	0.0675192	1.75163
WBGene00018782	cct-3	F54A3.3	0.424318	0.80863	0.0462124	1.75155
WBGene00008403		D2013.3	0.701521	0.808577	0.132091	1.75148
WBGene00013506	usp-3	Y71A12B.9	0.522004	0.807842	0.0682463	1.75059
WBGene00018232		F40E3.5	0.771339	0.807616	0.179406	1.75032
WBGene00018554	srt-3	F47D2.3	1	0.80753	0.166392	1.75021
WBGene00016389		C34B2.4	0.828743	0.807362	0.241695	1.75001
WBGene00017294		F09E10.1	0.789844	0.807188	0.189769	1.7498
WBGene00021006	dct-9	W03F11.3	0.775487	0.807176	0.181014	1.74978
WBGene00012711		Y39E4A.1	0.809756	0.806764	0.214084	1.74928
WBGene00010136		F55H12.5	0.733585	0.806725	0.150909	1.74924
WBGene00017152		EGAP798.1	0.830686	0.805813	0.248398	1.74813
WBGene00009846		F48F5.2	0.787342	0.805183	0.188042	1.74737
WBGene00013493	clec-9	Y70C5C.2	1	0.804996	0.20796	1.74714
WBGene00009705		F44F4.10	0.796325	0.804945	0.199861	1.74708
WBGene00000678	col-104	F58F6.1	0.807184	0.804877	0.209047	1.747
WBGene00220238		ZK185.9	1	0.80446	0.2159	1.74649
WBGene00008228		C50B8.6	0.620615	0.804432	0.09811	1.74646
WBGene00011296	glb-21	R102.9	1	0.804176	0.216241	1.74615
WBGene00001713	grl-4	F42C5.7	0.686418	0.804009	0.123311	1.74595
WBGene00009344		F32H2.7	0.737499	0.80397	0.155173	1.7459
WBGene00010902		M79.2	0.53108	0.803586	0.0707876	1.74543
WBGene00009192		F27E5.1	0.476137	0.803297	0.0573071	1.74509
WBGene00018493		F46F5.1	0.835392	0.803214	0.25274	1.74498
WBGene00014246		ZK1307.3	0.791054	0.802986	0.193596	1.74471
WBGene00015295	acl-12	C01C10.3	0.716349	0.802693	0.141058	1.74435
WBGene00018178		F38E1.3	0.775487	0.802533	0.180983	1.74416
WBGene00019976	fbxa-195	R09B5.1	0.835392	0.80243	0.253402	1.74404
WBGene00015231	cutl-14	B0511.5	0.788458	0.802135	0.188719	1.74368
WBGene00045271		F07G6.10	0.667144	0.80207	0.11524	1.7436
WBGene00017721		F22F7.3	0.834016	0.801518	0.25079	1.74293
WBGene00001386	far-2	F02A9.3	0.429285	0.801415	0.046978	1.74281
WBGene00202029		K03C7.14	1	0.80117	0.168962	1.74251
WBGene00006531	tba-5	F16D3.1	0.825943	0.799972	0.238254	1.74107
WBGene00016010		C23G10.1	0.762777	0.799953	0.169456	1.74104
WBGene00022542		ZC190.8	0.80816	0.799785	0.210008	1.74084
WBGene00020662		T21H3.1	0.440785	0.799655	0.0489927	1.74069
WBGene00017057		D2062.5	0.82435	0.799398	0.234327	1.74037
WBGene00014039		ZK662.2	0.794984	0.799187	0.197227	1.74012
WBGene00194665		ZK822.8	0.810521	0.798629	0.216982	1.73945
WBGene00044289		Y37F4.8	0.835392	0.797795	0.252223	1.73844
WBGene00019064	myo-5	F58G4.1	0.527885	0.797757	0.0698606	1.7384
WBGene00019006	spg-20	F57B10.9	0.641136	0.797754	0.105039	1.73839
WBGene00022874	nep-25	ZK1248.1	1	0.797651	0.238197	1.73827
WBGene00001479	fmo-4	F53F4.5	0.633418	0.797631	0.102274	1.73824
WBGene00016605		C43E11.5	0.752131	0.796966	0.16411	1.73744
WBGene00020959		W02H5.4	0.83026	0.79696	0.24451	1.73744
WBGene00012169		W01B6.2	0.770182	0.796878	0.177377	1.73734
WBGene00010969		R01E6.5	0.825646	0.796846	0.236004	1.7373
WBGene00016125		C26B2.2	0.775714	0.796746	0.181125	1.73718
WBGene00008737	gnrr-7	F13D2.3	0.825266	0.796152	0.23538	1.73646
WBGene00019081		F59A3.8	0.765254	0.795149	0.172246	1.73526
WBGene00198513		F30H5.7	1	0.795016	0.198543	1.7351
WBGene00235299		Y69A2AR.48	1	0.794984	0.171317	1.73506
WBGene00007264		C02F4.4	0.820827	0.794244	0.228603	1.73417
WBGene00044618	bus-2	K08D12.5	0.810346	0.794139	0.216839	1.73404
WBGene00022289		Y75B7B.2	0.835392	0.794006	0.258134	1.73388
WBGene00000608	col-19	ZK1193.1	0.432257	0.793612	0.0475689	1.73341
WBGene00001577	gem-4	T12A7.1	0.682572	0.79344	0.121151	1.7332
WBGene00010047		F54D1.6	0.637049	0.792955	0.103447	1.73262
WBGene00009157		F26E4.2	0.764232	0.79287	0.171511	1.73252
WBGene00014158		ZK938.1	0.711973	0.792747	0.138438	1.73237
WBGene00016289	lntl-1	C31H1.6	0.620966	0.792609	0.0983865	1.7322
WBGene00012177	decr-1.2	W01C9.4	0.759327	0.792353	0.166973	1.7319
WBGene00023402		ZK488.3	1	0.791244	0.243968	1.73057
WBGene00044917		F40F8.12	1	0.791242	0.214107	1.73056
WBGene00013999		ZK550.5	0.74294	0.791026	0.158515	1.73031
WBGene00045433		F49D11.10	0.513481	0.79082	0.0663401	1.73006
WBGene00021589		Y46D2A.1	0.825943	0.79024	0.238256	1.72936
WBGene00012572		Y37H2B.1	0.83584	0.790102	0.260103	1.7292
WBGene00020342	fbxa-201	T08B1.5	0.828743	0.789921	0.241546	1.72898
WBGene00007202		B0564.2	0.835392	0.789493	0.252641	1.72847
WBGene00012821		Y43F8B.11	0.809562	0.78912	0.212536	1.72802
WBGene00010320		F59B10.4	0.633716	0.788966	0.102625	1.72784
WBGene00021048		W05H9.1	0.573788	0.788808	0.0821642	1.72765
WBGene00018660		F52C6.3	0.740317	0.788353	0.157175	1.7271
WBGene00006759	unc-22	ZK617.1	0.59617	0.788103	0.0886935	1.7268
WBGene00013773		Y116A8A.2	0.835843	0.787889	0.261204	1.72655
WBGene00020335	ttr-30	T08A9.2	0.716349	0.787846	0.141175	1.72649
WBGene00017050		D2024.1	0.815259	0.787592	0.221091	1.72619
WBGene00012291		W06A7.2	0.546222	0.787573	0.0738803	1.72617
WBGene00015629		C09B9.4	0.748085	0.787498	0.162036	1.72608
WBGene00000377	cct-1	T05C12.7	0.453558	0.78702	0.0518897	1.72551
WBGene00219572	linc-146	C51E3.13	0.835843	0.786717	0.261862	1.72514
WBGene00017657		F21C10.7	0.602438	0.786557	0.0901274	1.72495
WBGene00022528	srt-13	ZC142.1	0.833389	0.785953	0.250139	1.72423
WBGene00045053		K12C11.7	0.734956	0.785897	0.152223	1.72416
WBGene00001863	him-4	F15G9.4	0.498144	0.78565	0.0627689	1.72387
WBGene00011200		R10E4.3	0.802561	0.785537	0.205208	1.72373
WBGene00012605		Y38F1A.1	0.76678	0.7855	0.173615	1.72369
WBGene00044787		C54D10.12	0.833389	0.785078	0.250385	1.72319
WBGene00015058		B0222.10	0.836204	0.784892	0.263062	1.72296
WBGene00014007		ZK596.2	0.747813	0.784743	0.161824	1.72279
WBGene00206357		C09D4.9	0.8287	0.784051	0.241295	1.72196
WBGene00010265		F58G1.3	0.776832	0.78397	0.181697	1.72186
WBGene00219544		C17G1.14	1	0.783716	0.175644	1.72156
WBGene00219899		F17C11.24	1	0.783716	0.175644	1.72156
WBGene00044662		F26G1.9	0.835392	0.783712	0.25343	1.72155
WBGene00004100	pqn-8	C05B5.3	0.770749	0.78366	0.178825	1.72149
WBGene00195185		F19G12.9	0.789844	0.783632	0.191767	1.72146
WBGene00197065		M28.13	1	0.783544	0.175657	1.72135
WBGene00199315		T04C12.23	1	0.783544	0.175657	1.72135
WBGene00044563		T26C11.8	1	0.783544	0.175657	1.72135
WBGene00021905	helq-1	Y55B1AL.3	0.602438	0.783337	0.0901977	1.72111
WBGene00004960	spe-6	Y66D12A.20	0.750259	0.782523	0.162975	1.72014
WBGene00017872		F28A10.4	0.835392	0.782359	0.25863	1.71994
WBGene00012012		T25B9.6	0.767547	0.782284	0.174476	1.71985
WBGene00018165		F38A5.8	0.825065	0.782255	0.235118	1.71982
WBGene00020203		T04B8.1	0.828743	0.781904	0.242616	1.7194
WBGene00011770		T14G8.2	0.794984	0.78143	0.197911	1.71883
WBGene00017871		F28A10.3	0.837268	0.781319	0.265759	1.7187
WBGene00023021		F32A5.9	0.608454	0.780952	0.0927935	1.71826
WBGene00016128	elpc-4	C26B2.6	0.608454	0.78087	0.0932194	1.71817
WBGene00017055		D2062.1	0.82083	0.779892	0.228932	1.717
WBGene00016541		C39H7.1	0.750368	0.779582	0.163267	1.71663
WBGene00018296		F41F3.1	0.830336	0.779025	0.247094	1.71597
WBGene00001437	fkh-5	F26A1.2	0.837268	0.778967	0.267407	1.7159
WBGene00044758		Y37H2A.12	0.611414	0.77842	0.0950179	1.71525
WBGene00008216	mec-19	C49G9.1	0.809756	0.777836	0.213989	1.71456
WBGene00020539		T16D1.1	0.835392	0.777833	0.254146	1.71455
WBGene00235254		F49D11.14	0.837268	0.777564	0.264554	1.71423
WBGene00010901		M28.10	0.4736	0.777485	0.0565324	1.71414
WBGene00043743		Y59E9AL.2	0.710128	0.777465	0.137185	1.71412
WBGene00016954		C55C3.4	0.770182	0.777257	0.177524	1.71387
WBGene00007153	clec-41	B0365.6	0.608454	0.77713	0.0933254	1.71372
WBGene00006825	unc-96	F13C5.6	0.650208	0.777117	0.109037	1.7137
WBGene00013044		Y49E10.25	1	0.776927	0.206149	1.71348
WBGene00006586	tni-4	W03F8.1	0.583644	0.776918	0.0845103	1.71347
WBGene00005644	srp-3	Y32G9A.4	0.747558	0.77602	0.161724	1.7124
WBGene00003465	msp-78	T13F2.11	0.706959	0.776008	0.135496	1.71239
WBGene00000103	akt-2	F28H6.1	0.608454	0.775987	0.0933544	1.71236
WBGene00018271		F41C3.5	0.484915	0.775653	0.0599335	1.71197
WBGene00000063	act-1	T04C12.6	0.611158	0.775134	0.0941973	1.71135
WBGene00019667		K12B6.2	0.813396	0.774982	0.219826	1.71117
WBGene00044440	adpr-1	Y73E7A.9	0.563526	0.774821	0.0791504	1.71098
WBGene00019958		R08E3.2	0.612239	0.774547	0.0954954	1.71065
WBGene00044347		Y71G12B.30	0.770749	0.774178	0.178413	1.71022
WBGene00005663	sars-1	C47E12.1	0.463497	0.774157	0.054246	1.71019
WBGene00014861		Y6B3B.2	0.835392	0.774056	0.257327	1.71007
WBGene00003827	ntl-4	C49H3.5	0.812185	0.774008	0.217861	1.71001
WBGene00000117	alh-11	F42G9.5	0.504238	0.774001	0.0641005	1.71001
WBGene00013082	grdn-1	Y51A2D.15	0.706165	0.773854	0.13526	1.70983
WBGene00044896		K12C11.5	0.815259	0.773692	0.221007	1.70964
WBGene00016512		C38C3.3	0.770749	0.773153	0.178881	1.709
WBGene00020642		T20H9.6	0.834016	0.772874	0.250948	1.70867
WBGene00003596	ngp-1	T19A6.2	0.473047	0.7728	0.0561775	1.70858
WBGene00021934	cct-8	Y55F3AR.3	0.507588	0.772685	0.0650067	1.70845
WBGene00021631		Y47D9A.4	0.837807	0.772427	0.269297	1.70814
WBGene00002978	lev-11	Y105E8B.1	0.570254	0.77191	0.0809669	1.70753
WBGene00016509	adss-1	C37H5.6	0.4736	0.771842	0.0564578	1.70745
WBGene00044753		F49H12.7	0.8287	0.771495	0.240982	1.70704
WBGene00016014		C23G10.7	0.552182	0.771424	0.0753363	1.70695
WBGene00007380		C06C6.6	0.8287	0.771206	0.241206	1.7067
WBGene00012585	lips-15	Y38E10A.7	0.591088	0.77091	0.0869556	1.70635
WBGene00009463		F36D1.4	0.80046	0.770519	0.203985	1.70588
WBGene00019216		H20J04.1	0.815259	0.770197	0.221684	1.7055
WBGene00021720		Y49F6B.8	0.809756	0.770098	0.213595	1.70539
WBGene00001080	dpy-21	Y59A8B.1	0.506009	0.770098	0.0646544	1.70539
WBGene00016781		C49G7.3	0.530748	0.76998	0.0706803	1.70525
WBGene00009449		F35H8.4	0.80235	0.769753	0.205061	1.70498
WBGene00008974	tbc-1	F20D1.2	0.546728	0.769446	0.0740084	1.70462
WBGene00009683		F44D12.6	0.823146	0.769354	0.233819	1.70451
WBGene00001169	eef-1A.2	R03G5.1	0.827903	0.769173	0.240028	1.70429
WBGene00016286		C31H1.1	0.813202	0.769138	0.219726	1.70425
WBGene00010869		M05B5.1	0.769323	0.768611	0.176517	1.70363
WBGene00019682		K12H4.7	0.468219	0.768553	0.0551597	1.70356
WBGene00008605	mlt-9	F09B12.1	0.8287	0.768517	0.241331	1.70352
WBGene00011868	best-18	T20G5.4	0.645172	0.768484	0.107273	1.70348
WBGene00000223	atf-7	C07G2.2	0.496184	0.768302	0.0623432	1.70326
WBGene00003472	mtk-1	B0414.7	0.615975	0.768102	0.0965906	1.70303
WBGene00006053	ssq-4	T28H11.1	0.734913	0.767966	0.152009	1.70287
WBGene00008381		D1081.3	0.82466	0.767712	0.234758	1.70257
WBGene00000733	col-160	F57B1.4	0.552182	0.767544	0.0753051	1.70237
WBGene00011026		R05D7.1	0.740875	0.767483	0.157509	1.7023
WBGene00008970		F20C5.5	0.818705	0.767463	0.224865	1.70227
WBGene00045148		C06A1.8	0.837268	0.767349	0.266512	1.70214
WBGene00013106	set-26	Y51H4A.12	0.508852	0.767347	0.0652947	1.70214
WBGene00001113	dur-1	F25H8.5	0.68557	0.767217	0.122734	1.70198
WBGene00044952		Y24D9A.9	0.837807	0.767005	0.274113	1.70173
WBGene00020653		T21E3.2	0.830336	0.766921	0.247611	1.70163
WBGene00021787		Y51H7C.9	0.787342	0.766876	0.187986	1.70158
WBGene00017351	cutl-5	F10E7.10	0.822055	0.766825	0.233088	1.70152
WBGene00018268		F41C3.2	0.736961	0.766673	0.153587	1.70134
WBGene00011077		R07B1.5	0.835392	0.76604	0.258153	1.7006
WBGene00009502		F37A8.2	0.802102	0.766019	0.204896	1.70057
WBGene00195486		ZC308.5	1	0.765859	0.18267	1.70038
WBGene00000705	col-131	C39E9.3	0.830679	0.765041	0.248239	1.69942
WBGene00007222		C01F6.2	0.762777	0.764725	0.169274	1.69905
WBGene00200167		F45D3.11	1	0.764346	0.211145	1.6986
WBGene00219569	linc-147	C46F11.10	1	0.764346	0.211145	1.6986
WBGene00021349	arl-13	Y37E3.5	0.813202	0.764172	0.219237	1.6984
WBGene00007778		C27D8.2	0.769323	0.764115	0.175708	1.69833
WBGene00004796	sid-2	ZK520.2	0.648505	0.763959	0.108247	1.69814
WBGene00015507		C06A6.2	0.621643	0.763868	0.0987888	1.69804
WBGene00010246		F58D5.7	0.789844	0.763286	0.190963	1.69735
WBGene00022030		Y65B4A.7	0.825646	0.763023	0.236791	1.69704
WBGene00018694		F52E1.5	0.736961	0.762295	0.154403	1.69619
WBGene00007306		C04G2.5	0.803057	0.762192	0.205552	1.69607
WBGene00018664	bath-11	F52C6.7	0.770749	0.761885	0.17887	1.6957
WBGene00016765		C49C8.1	0.80816	0.76177	0.210245	1.69557
WBGene00007239		C01G10.14	0.789844	0.761765	0.190647	1.69556
WBGene00001336	qars-1	Y41E3.4	0.481349	0.76144	0.0589909	1.69518
WBGene00015932		C17H12.6	0.830374	0.761331	0.247713	1.69505
WBGene00201965		F10D11.8	1	0.760777	0.184635	1.6944
WBGene00009473		F36D3.8	0.825646	0.760374	0.236165	1.69393
WBGene00219666	linc-31	D1014.12	0.835392	0.76035	0.253692	1.6939
WBGene00044453		Y102E9.6	1	0.760198	0.211179	1.69372
WBGene00020070	rmd-6	R13H9.1	0.790962	0.760083	0.193397	1.69359
WBGene00009078	rpb-12	F23B2.13	0.589794	0.760067	0.086422	1.69357
WBGene00019260		H34I24.1	0.806333	0.759815	0.207745	1.69327
WBGene00020635		T20H4.2	0.80235	0.759772	0.205085	1.69322
WBGene00014826		R13H4.2	0.538168	0.759249	0.0722431	1.69261
WBGene00008917		F17C11.6	0.770182	0.759191	0.177814	1.69254
WBGene00013979		ZK507.3	0.789844	0.758998	0.191054	1.69231
WBGene00010692		K08H2.5	0.835392	0.758679	0.259407	1.69194
WBGene00008724		F13A7.1	0.776151	0.758561	0.1814	1.6918
WBGene00198946		C34G6.9	1	0.75852	0.185391	1.69175
WBGene00007024	plin-1	W01A8.1	0.628377	0.758369	0.100857	1.69158
WBGene00007611		C15H7.4	0.835392	0.758306	0.252012	1.6915
WBGene00009402		F35C11.3	0.815184	0.758039	0.22079	1.69119
WBGene00005523	sri-11	T22H2.3	0.839104	0.757868	0.278486	1.69099
WBGene00018114	srt-41	F36H9.6	0.83931	0.75783	0.280749	1.69094
WBGene00000115	alh-9	F01F1.6	0.491808	0.757551	0.0613528	1.69062
WBGene00013823		Y116F11B.7	0.825646	0.757493	0.237647	1.69055
WBGene00003463	msp-76	ZK1251.6	0.73665	0.757227	0.152941	1.69024
WBGene00015955		C18B2.4	0.546731	0.75694	0.074106	1.6899
WBGene00008423		D2045.5	0.789201	0.756912	0.189178	1.68987
WBGene00007863		C32C4.3	0.828743	0.756686	0.241893	1.6896
WBGene00004804	skn-1	T19E7.2	0.56741	0.756316	0.080224	1.68917
WBGene00010373		H08M01.1	0.809756	0.7563	0.214068	1.68915
WBGene00018729		F53A9.6	0.736961	0.756238	0.153456	1.68908
WBGene00008244	fipr-11	C50H2.10	0.770182	0.756168	0.177011	1.689
WBGene00194934		ZK809.9	0.837807	0.755635	0.271553	1.68837
WBGene00219695	linc-126	F42A9.16	1	0.754991	0.263154	1.68762
WBGene00018851		F55A3.6	0.839104	0.754624	0.27881	1.68719
WBGene00014997		AC7.3	0.830248	0.754622	0.24349	1.68719
WBGene00201165		Y110A7A.23	1	0.754255	0.255048	1.68676
WBGene00022085		Y69A2AR.14	0.815184	0.753799	0.220682	1.68623
WBGene00011290		R102.3	0.822055	0.753779	0.23296	1.6862
WBGene00007273		C03C10.7	1	0.75375	0.271415	1.68617
WBGene00044062	snb-6	T14D7.3	0.809756	0.753214	0.216012	1.68554
WBGene00044441		Y119C1B.11	0.83931	0.753151	0.279706	1.68547
WBGene00011919		T22C1.9	0.789844	0.753094	0.190836	1.6854
WBGene00013250		Y57A10A.5	0.682572	0.753024	0.121333	1.68532
WBGene00021993		Y59E9AL.3	0.765264	0.752941	0.172502	1.68522
WBGene00007792		C28D4.4	0.820254	0.752676	0.228033	1.68492
WBGene00008259		C52E4.7	0.794984	0.752671	0.198393	1.68491
WBGene00002274	lec-11	F38A5.3	0.637049	0.752417	0.103565	1.68461
WBGene00008143		C47E8.4	0.64257	0.752377	0.105719	1.68457
WBGene00006097	str-31	C54F6.10	0.837807	0.75212	0.274	1.68427
WBGene00023464	srz-80	C09G12.12	1	0.752067	0.216732	1.6842
WBGene00016085		C25A8.5	0.789844	0.75198	0.191356	1.6841
WBGene00003888	osm-8	R07G3.6	0.835843	0.751906	0.262519	1.68402
WBGene00010138	anoh-1	F56A8.1	0.839367	0.751887	0.28293	1.68399
WBGene00018144		F37C4.4	0.744477	0.751696	0.159821	1.68377
WBGene00005655	srr-4	K11D12.3	0.648505	0.751375	0.108227	1.6834
WBGene00012005	2021-06-01	T24H10.7	0.606585	0.751066	0.092006	1.68304
WBGene00016075		C24H12.6	0.839374	0.75087	0.284754	1.68281
WBGene00009596	sre-8	F40G12.1	1	0.750803	0.234212	1.68273
WBGene00019555		K09C6.1	0.833389	0.750795	0.249872	1.68272
WBGene00006272	str-245	F32A7.7	0.837807	0.750744	0.276087	1.68266
WBGene00018477	otpl-4	F45F2.1	1	0.749979	0.219473	1.68177
WBGene00019255		H32C10.1	0.80046	0.749973	0.203266	1.68176
WBGene00012637		Y38H8A.3	0.809756	0.749736	0.216239	1.68149
WBGene00009044		F22B5.6	0.782907	0.749598	0.185152	1.68132
WBGene00194896		W02H5.11	1	0.749592	0.219984	1.68132
WBGene00017672		F21F3.2	0.821609	0.749573	0.230034	1.6813
WBGene00016924		C54F6.6	0.839374	0.749087	0.284895	1.68073
WBGene00020391	cct-7	T10B5.5	0.504238	0.748863	0.0641588	1.68047
WBGene00009741	drr-1	F45H10.4	0.655939	0.748678	0.110808	1.68025
WBGene00009574		F40E10.6	0.523731	0.748471	0.0688971	1.68001
WBGene00044131		Y45G12C.16	1	0.748326	0.188976	1.67984
WBGene00016462		C35E7.10	0.794984	0.74817	0.197469	1.67966
WBGene00022617		ZC477.2	0.828743	0.748094	0.241529	1.67957
WBGene00017975		F32B5.1	0.768435	0.747705	0.174901	1.67912
WBGene00013026		Y49A3A.3	0.60414	0.747584	0.0914202	1.67898
WBGene00021779		Y51H7C.1	0.809756	0.747413	0.214602	1.67878
WBGene00010082		F55A11.11	0.807184	0.746796	0.208748	1.67806
[truncated: 16,277 more rows]

## Sheet: B. sams1.15.37
wormbase_id	gene_name	sequence	padj	log2FoldChange	pvalue	foldChange
WBGene00002018	hsp-16.41	Y46H3A.2	0	9.5687	0	759.391
WBGene00002016	hsp-16.2	Y46H3A.3	0	9.34333	0	649.564
WBGene00012618	dct-10	Y38H6C.5	8.79e-171	8.8575	3.39e-174	463.845
WBGene00002019	hsp-16.48	T27E4.3	8.4e-274	8.68633	2.31e-277	411.952
WBGene00002020	hsp-16.49	T27E4.9	8.4e-274	8.68633	2.31e-277	411.952
WBGene00002017	hsp-16.11	T27E4.2	0	8.61865	0	393.072
WBGene00002026	hsp-70	C12C8.1	5.83e-228	8.55317	1.93e-231	375.631
WBGene00045238	rpr-1	Y48G10A.7	1.42e-90	8.08149	1.09e-93	270.876
WBGene00012621		Y38H6C.8	1.43e-131	7.86259	7.86e-135	232.742
WBGene00012456		Y17D7C.2	1.67e-86	7.81617	1.38e-89	225.373
WBGene00021098	fbxb-14	W08F4.9	1.27e-60	7.49671	1.96e-63	180.607
WBGene00007682		C18D11.6	3.24e-77	7.49389	3.22e-80	180.255
WBGene00013154		Y53F4B.7	1.07e-59	6.85804	1.82e-62	116.005
WBGene00044443		ZC21.10	2.25e-60	6.83278	3.6e-63	113.992
WBGene00012620		Y38H6C.7	2.04e-38	6.73325	6.52e-41	106.393
WBGene00013155		Y53F4B.8	3.76e-68	6.71546	4.77e-71	105.089
WBGene00011231		R11A5.3	1.81e-111	6.64774	1.09e-114	100.269
WBGene00219491		Y53F4B.62	5.43e-38	6.51656	1.82e-40	91.5548
WBGene00219343		Y17D7C.9	2.01e-76	6.32929	2.21e-79	80.4091
WBGene00016637		C44B12.3	1.81e-36	6.28804	6.79e-39	78.1427
WBGene00045366		Y17D7C.3	1.24e-164	6.1888	5.48e-168	72.9483
WBGene00009692		F44E5.5	9.02e-96	5.83534	6.46e-99	57.0969
WBGene00009691		F44E5.4	3.33e-78	5.72892	3.12e-81	53.0369
WBGene00013172		Y53F4B.26	1.44e-36	5.68973	5.31e-39	51.6155
WBGene00000628	col-51	T28F2.8	1.89e-21	5.68497	1.62e-23	51.4455
WBGene00219601	linc-129	K11D9.9	4.01e-24	5.67282	2.78e-26	51.0139
WBGene00007723		C25F9.2	2.05e-65	5.53873	2.83e-68	46.486
WBGene00194658		R09E10.13	1.49e-59	5.36551	2.63e-62	41.2267
WBGene00021601		Y46H3A.5	1.07e-30	5.2565	5.23e-33	38.2264
WBGene00199016		W06H8.12	1.19e-15	5.14175	1.76e-17	35.3038
WBGene00044726		Y53F4B.43	9.14e-17	5.11985	1.23e-18	34.772
WBGene00195155		W04A8.9	5.57e-25	5.11698	3.68e-27	34.7027
WBGene00008405	ttll-12	D2013.9	4.82e-133	5.0789	2.39e-136	33.7988
WBGene00022693		ZK250.10	3.55e-33	5.05398	1.55e-35	33.2199
WBGene00219672	anr-54	F08B1.7	1.62e-18	4.94973	1.82e-20	30.9043
WBGene00164985		ZK1010.10	5.18e-38	4.9484	1.71e-40	30.8757
WBGene00008447		E01G4.5	7.19e-53	4.94297	1.46e-55	30.7596
WBGene00001534	gcy-7	F52E1.4	2.39e-30	4.92206	1.19e-32	30.3171
WBGene00044900	cnc-11	R09B5.13	1.9e-22	4.79676	1.54e-24	27.7951
WBGene00045372		W01D2.8	3.35e-12	4.68271	7.32e-14	25.6824
WBGene00008944		F19B2.5	1.26e-100	4.64724	8.36e-104	25.0588
WBGene00219449		Y38A10A.11	2.75e-22	4.62885	2.25e-24	24.7413
WBGene00045412		C25F9.12	1.86e-34	4.60147	7.19e-37	24.2761
WBGene00014454		MTCE.7	9.88e-77	4.52496	1.03e-79	23.0223
WBGene00014472		MTCE.33	2.41e-67	4.50273	3.19e-70	22.6703
WBGene00014814		R03D7.3	3.63e-32	4.47401	1.68e-34	22.2235
WBGene00044207		Y6G8.5	1.18e-42	4.40644	3.06e-45	21.2065
WBGene00021101		W08F4.12	1.97e-15	4.36212	3.03e-17	20.565
WBGene00009156	clec-196	F26D10.12	2.27e-17	4.35834	2.86e-19	20.5112
WBGene00044168		M05D6.10	1.95e-11	4.34474	4.85e-13	20.3187
WBGene00194925		K08D8.11	7.28e-16	4.27749	1.06e-17	19.3933
WBGene00006650	tts-1	F09E10.11	2.9e-46	4.13124	6.24e-49	17.5238
WBGene00020596	oga-1	T20B5.3	3.73e-57	4.06688	6.99e-60	16.7592
WBGene00019858		R03H10.6	6.07e-44	4.06351	1.4e-46	16.7201
WBGene00022746		ZK470.4	6.08e-09	4.04179	2.19e-10	16.4702
WBGene00001749	gst-1	R107.7	2.51e-76	3.98448	2.9e-79	15.8288
WBGene00045272		F59C12.4	3.44e-33	3.96275	1.48e-35	15.5922
WBGene00001784	gst-36	R07B1.4	2.23e-73	3.96067	2.7e-76	15.5698
WBGene00010752		K10G4.3	5.62e-37	3.92565	2.01e-39	15.1963
WBGene00005548	sri-36	F33H12.5	2.47e-23	3.85872	1.83e-25	14.5075
WBGene00018522		F46H5.7	2.37e-09	3.82754	7.97e-11	14.1972
WBGene00200308		C56C10.15	1.12e-07	3.8148	5.12e-09	14.0725
WBGene00022951		C30E1.9	1.22e-57	3.81087	2.21e-60	14.0341
WBGene00012137	asic-2	T28F4.2	1.41e-20	3.70537	1.33e-22	13.0445
WBGene00003616	nhr-17	C02B4.2	3.23e-34	3.69195	1.28e-36	12.9238
WBGene00009972	oac-33	F53C11.2	3.39e-15	3.68097	5.29e-17	12.8257
WBGene00022382		Y94H6A.10	2.8e-60	3.65403	4.63e-63	12.5885
WBGene00001875	his-1	T10C6.14	3.04e-13	3.65389	5.81e-15	12.5872
WBGene00007303	rnh-1.3	C04F12.9	2.07e-35	3.62293	7.88e-38	12.32
WBGene00002013	hsp-12.6	F38E11.2	3.34e-29	3.60921	1.73e-31	12.2034
WBGene00004744	scp-1	D2013.8	1.51e-52	3.60568	3.17e-55	12.1735
WBGene00016508		C37H5.5	1.33e-62	3.58556	1.98e-65	12.005
WBGene00012600		Y38E10A.22	1.28e-62	3.58367	1.83e-65	11.9892
WBGene00219886		F09E10.15	7.02e-23	3.57178	5.42e-25	11.8909
WBGene00000617	col-40	T13B5.4	2.4e-08	3.56417	9.56e-10	11.8283
WBGene00018724		F53A9.1	2e-40	3.56117	5.63e-43	11.8037
WBGene00019072	fbxc-8	F58H7.7	1.39e-25	3.55117	8.91e-28	11.7222
WBGene00015056		B0222.5	4.5e-39	3.54858	1.36e-41	11.7011
WBGene00018648		F49F1.8	3.47e-08	3.54723	1.44e-09	11.6902
WBGene00220041		R11A5.8	3.89e-07	3.53546	1.95e-08	11.5953
WBGene00005551	sri-39	F33H12.2	3.22e-06	3.50249	1.93e-07	11.3333
WBGene00018209		F39G3.4	8.64e-07	3.49248	4.6e-08	11.2549
WBGene00011957		T23F11.6	1.43e-28	3.48098	7.72e-31	11.1655
WBGene00021478		Y39H10A.1	9.28e-11	3.48054	2.47e-12	11.1621
WBGene00000097	aip-1	F58E10.4	3.76e-43	3.45714	9.54e-46	10.9825
WBGene00021599	srt-42	Y46H3A.1	1.24e-07	3.45478	5.68e-09	10.9646
WBGene00219683	anr-32	F29G9.18	1.22e-17	3.42406	1.49e-19	10.7335
WBGene00012195	bath-34	W02A11.5	5.94e-23	3.42294	4.55e-25	10.7252
WBGene00196687		C09B8.12	1.84e-07	3.41705	8.8e-09	10.6815
WBGene00045411		C25F9.11	8.16e-33	3.40887	3.69e-35	10.6212
WBGene00022713		ZK355.3	1.52e-07	3.40473	7.09e-09	10.5907
WBGene00016250	hsp-110	C30C11.4	1.54e-53	3.39981	3.05e-56	10.5547
WBGene00018809		F54D10.8	1.17e-14	3.39131	1.89e-16	10.4927
WBGene00009589		F40F11.4	1.41e-16	3.38818	1.92e-18	10.4699
WBGene00006169	str-118	F57A8.3	1.56e-06	3.37622	8.77e-08	10.3835
WBGene00006650	tts-1	F09E10.11	2.5e-26	3.35062	1.54e-28	10.2009
WBGene00022866		ZK1240.1	3.87e-09	3.34931	1.36e-10	10.1916
WBGene00194803		C25F9.16	9.45e-07	3.33559	5.07e-08	10.0952
WBGene00000915	daf-21	C47E8.5	5.64e-42	3.30386	1.49e-44	9.87556
WBGene00019179	scl-13	H10D18.4	3.22e-05	3.29321	2.43e-06	9.80291
WBGene00020725	cnp-3	T23C6.3	2.69e-23	3.27302	2e-25	9.66666
WBGene00050899		T10C6.15	1.87e-15	3.24052	2.85e-17	9.45136
WBGene00044306		F58F9.8	2.86e-05	3.2383	2.13e-06	9.43681
WBGene00020677		T22B11.3	1.39e-19	3.23297	1.44e-21	9.40201
WBGene00007036	sod-5	ZK430.3	4.75e-06	3.21919	2.96e-07	9.31267
WBGene00022887		ZK1290.5	1.79e-40	3.1883	4.93e-43	9.11539
WBGene00219614	linc-105	W09D10.6	2.8e-05	3.18817	2.07e-06	9.11456
WBGene00019233	ugt-14	H23N18.2	1.37e-17	3.18326	1.68e-19	9.08358
WBGene00202400		C27D6.14	1.02e-06	3.18214	5.47e-08	9.0765
WBGene00220243		ZK484.11	4.74e-05	3.17615	3.7e-06	9.03894
WBGene00022549		ZC196.5	9.98e-34	3.17558	4.01e-36	9.03535
WBGene00005005	spp-20	K04A8.8	7.36e-15	3.1639	1.17e-16	8.96249
WBGene00011254		R12G8.1	2.4e-08	3.16302	9.55e-10	8.95704
WBGene00010788	sulp-4	K12G11.1	3.97e-27	3.13785	2.36e-29	8.80212
WBGene00219767	linc-131	Y71G12B.40	1.08e-07	3.12406	4.92e-09	8.71836
WBGene00018591	npax-2	F48B9.5	1.18e-20	3.09933	1.09e-22	8.5702
WBGene00219700	linc-6	F52D2.13	1.22e-08	3.07899	4.57e-10	8.45022
WBGene00018699		F52E1.12	7.93e-12	3.0668	1.82e-13	8.37915
WBGene00013196	tbc-20	Y54E2A.12	9.69e-40	3.05964	2.83e-42	8.33767
WBGene00021283		Y24D9A.5	4.41e-05	3.04917	3.42e-06	8.27735
WBGene00023320		K07E8.4	4.08e-06	3.03339	2.5e-07	8.18734
WBGene00020799		T25D10.1	1.03e-33	3.03173	4.21e-36	8.17787
WBGene00003161	mdf-2	Y69A2AR.30	1.58e-08	3.02273	6e-10	8.12703
WBGene00000391	cdd-1	C47D2.2	6.64e-33	3.00702	2.93e-35	8.03904
WBGene00008591		F08H9.3	1.48e-05	2.99865	1.02e-06	7.99252
WBGene00010434		H40L08.3	2.72e-13	2.99234	5.13e-15	7.95766
WBGene00011557	ostf-4	T07A5.4	0.000217397	2.9687	2.04e-05	7.8283
WBGene00012444		Y15E3A.5	1.99e-25	2.96566	1.28e-27	7.8118
WBGene00220000		K02F2.11	2.43e-06	2.96472	1.41e-07	7.80674
WBGene00219743	linc-103	W05H9.5	1.07e-06	2.94069	5.78e-08	7.6778
WBGene00019331	dos-3	K02F3.8	9.05e-05	2.93146	7.59e-06	7.62883
WBGene00002008	hsp-4	F43E2.8	1.46e-44	2.92273	3.29e-47	7.58277
WBGene00017168		F01F1.14	9.21e-10	2.92255	2.89e-11	7.58184
WBGene00006624	try-6	F48A9.3	4.78e-18	2.92096	5.58e-20	7.57351
WBGene00001755	gst-7	F11G11.2	8.25e-23	2.91762	6.5e-25	7.55597
WBGene00044462		C44B12.9	0.000229553	2.91455	2.17e-05	7.53993
WBGene00200577		Y65B4BL.12	0.000321562	2.91274	3.18e-05	7.53049
WBGene00018725	kreg-1	F53A9.2	2.94e-17	2.91255	3.72e-19	7.52948
WBGene00016834	sre-50	C50E10.11	0.000137231	2.89929	1.21e-05	7.4606
WBGene00010142		F56A8.8	0.000260749	2.89519	2.49e-05	7.43942
WBGene00012594	nspe-5	Y38E10A.16	6.63e-05	2.8789	5.41e-06	7.3559
WBGene00023263		D1005.t1	4.16e-10	2.87802	1.23e-11	7.35139
WBGene00016115	mdt-26	C25H3.6	7.4e-11	2.87681	1.95e-12	7.34524
WBGene00086560		ZK355.8	1.63e-06	2.86891	9.2e-08	7.30514
WBGene00019082	pup-3	F59A3.9	1.72e-08	2.85321	6.61e-10	7.22609
WBGene00022419		Y102A11A.9	1.92e-21	2.84459	1.66e-23	7.18304
WBGene00011737	sqst-1	T12G3.1	2.66e-30	2.83879	1.35e-32	7.1542
WBGene00017465		F14F9.2	0.000870388	2.83225	9.59e-05	7.12182
WBGene00000558	cnc-4	R09B5.9	4.85e-16	2.83168	6.92e-18	7.11901
WBGene00015741		C13F10.1	4.66e-06	2.8266	2.89e-07	7.094
WBGene00018624		F48G7.13	6.39e-08	2.82179	2.78e-09	7.07039
WBGene00022951		C30E1.9	1.41e-37	2.80876	4.96e-40	7.00684
WBGene00017970		F32A5.4	6.64e-33	2.80265	2.96e-35	6.9772
WBGene00017390		F12A10.1	1.63e-15	2.79465	2.45e-17	6.93862
WBGene00020737		T23F2.4	1.93e-05	2.79321	1.37e-06	6.93169
WBGene00022548		ZC196.4	3.74e-09	2.78843	1.3e-10	6.90875
WBGene00001915	his-41	C50F4.5	5.27e-29	2.78589	2.79e-31	6.89661
WBGene00023401		ZK380.t2	2.62e-13	2.78567	4.89e-15	6.89557
WBGene00219959		F52D2.14	2.59e-05	2.78214	1.9e-06	6.87873
WBGene00021285		Y24D9A.7	0.000606106	2.77327	6.44e-05	6.83657
WBGene00021382		Y37F4.1	2.04e-21	2.76753	1.79e-23	6.80939
WBGene00044724		R02E4.3	3.29e-18	2.74933	3.79e-20	6.72406
WBGene00001768	gst-20	Y48E1B.10	1.27e-22	2.74063	1.01e-24	6.6836
WBGene00010281		F58G11.3	5.28e-12	2.7221	1.19e-13	6.59833
WBGene00000904	daf-8	R05D11.1	2.38e-23	2.72001	1.74e-25	6.58875
WBGene00014967		Y113G7A.2	7.99e-06	2.71849	5.19e-07	6.58185
WBGene00003473	mtl-1	K11G9.6	2.87e-10	2.71583	8.22e-12	6.56971
WBGene00021837		Y54E10BL.1	0.00119365	2.70854	0.000137962	6.53661
WBGene00009374		F34D10.4	1.22e-27	2.70718	7.15e-30	6.53044
WBGene00201125		F17A9.7	3.44e-06	2.69925	2.08e-07	6.49462
WBGene00019881		R05D3.8	1.29e-19	2.69907	1.33e-21	6.49385
WBGene00011878	ador-1	T21B4.4	5.57e-11	2.69743	1.45e-12	6.48645
WBGene00010531		K03D3.5	0.00166579	2.69434	0.000202167	6.47256
WBGene00002021	hsp-17	F52E1.7	1.54e-32	2.69269	7.04e-35	6.4652
WBGene00013170		Y53F4B.24	3.4e-22	2.68858	2.81e-24	6.44679
WBGene00009963	fipr-26	F53B6.8	6.76e-07	2.68836	3.53e-08	6.44582
WBGene00235092		C54F6.17	1.41e-05	2.67627	9.54e-07	6.392
WBGene00014005		ZK593.9	1.49e-14	2.6637	2.44e-16	6.33657
WBGene00020587	ugt-9	T19H12.1	5.05e-08	2.66151	2.16e-09	6.32697
WBGene00000236	bag-1	F57B10.11	1.01e-24	2.6534	6.94e-27	6.2915
WBGene00016763		C49A9.9	4.44e-26	2.64999	2.79e-28	6.27664
WBGene00006578	tli-1	F25H2.1	6.42e-25	2.64243	4.38e-27	6.24384
WBGene00005833	srw-86	C25F9.7	2.04e-09	2.63987	6.79e-11	6.23274
WBGene00001633	gly-8	Y66A7A.6	2.66e-30	2.61843	1.34e-32	6.14081
WBGene00005586	sri-74	F33H12.4	0.00018686	2.61359	1.72e-05	6.12026
WBGene00044514		R09E12.9	6.59e-05	2.60913	5.38e-06	6.10134
WBGene00012107		T27F6.8	1.21e-26	2.60792	7.25e-29	6.09624
WBGene00007761	rad-26	C27B7.4	4.59e-32	2.60766	2.15e-34	6.09515
WBGene00020834		T27A1.2	1.75e-05	2.6054	1.23e-06	6.0856
WBGene00016783	irg-2	C49G7.5	6.76e-09	2.56637	2.46e-10	5.92317
WBGene00044293		K08D12.7	0.00297374	2.55341	0.000395309	5.87022
WBGene00044743	crb-3	C35B8.4	6.52e-22	2.55253	5.49e-24	5.86663
WBGene00019664		K11H12.8	1.62e-20	2.54407	1.54e-22	5.83231
WBGene00000188	arl-3	F19H8.3	2.36e-08	2.54108	9.36e-10	5.82024
WBGene00021479	oac-55	Y39H10A.2	0.0003811	2.53792	3.87e-05	5.80752
WBGene00000549	cls-2	R107.6	5.75e-31	2.53204	2.79e-33	5.7839
WBGene00003954	pcm-1	C10F3.5	1.02e-19	2.53195	1.04e-21	5.78353
WBGene00010876		M05D6.3	8.29e-17	2.5283	1.1e-18	5.7689
WBGene00012468		Y17G7B.17	7.88e-28	2.52069	4.56e-30	5.73856
WBGene00195165		F57G4.11	0.00339114	2.51986	0.00046166	5.73525
WBGene00005899	srx-8	C14C6.9	0.00294147	2.50466	0.000390533	5.67517
WBGene00219676	linc-48	F11C7.10	0.00168432	2.50063	0.000204973	5.65934
WBGene00195363		M01H9.6	0.00376358	2.49767	0.000520831	5.64771
WBGene00005291	srh-70	T21B4.9	4.62e-07	2.49508	2.33e-08	5.6376
WBGene00043052	srz-104	K03D3.11	0.00409939	2.49286	0.000574755	5.62894
WBGene00007928		C34C12.9	8.83e-09	2.48683	3.24e-10	5.60544
WBGene00008433	2021-03-02	D2089.2	5.51e-14	2.48172	9.44e-16	5.58564
WBGene00020085		R106.1	0.00519764	2.47303	0.000756223	5.5521
WBGene00001425	fis-2	F13B9.8	3.71e-25	2.46856	2.43e-27	5.5349
WBGene00201513		ZK1290.22	0.00440968	2.46729	0.000623361	5.53004
WBGene00219605	linc-110	T09A5.22	2.69e-08	2.4598	1.09e-09	5.5014
WBGene00017834		F26F12.3	6.31e-19	2.45783	6.92e-21	5.4939
WBGene00008615		F09C6.1	7.81e-05	2.45513	6.46e-06	5.48362
WBGene00005242	srh-17	C47E8.2	0.00254441	2.44126	0.000327963	5.43117
WBGene00194710	mks-2	C30B5.9	0.00143292	2.43266	0.000169799	5.39886
WBGene00021284		Y24D9A.6	0.00339834	2.42954	0.000462985	5.38722
WBGene00015175	srz-4	B0414.1	0.00363882	2.42933	0.000500759	5.38643
WBGene00236797		Y71G12B.44	1.9e-05	2.42782	1.35e-06	5.3808
WBGene00001779	gst-31	Y53F4B.35	0.00134943	2.42053	0.000158568	5.35367
WBGene00009811		F47B8.10	4.93e-05	2.40849	3.87e-06	5.3092
WBGene00003601	nhr-2	C32F10.6	2.01e-05	2.40603	1.44e-06	5.30015
WBGene00010234	ttr-50	F58B3.9	3.78e-05	2.39984	2.9e-06	5.27744
WBGene00023325		K10F12.1	0.000583313	2.39696	6.18e-05	5.26692
WBGene00017921		F29B9.5	1.94e-11	2.39478	4.8e-13	5.25898
WBGene00021527	aakg-3	Y41G9A.3	1.14e-07	2.38795	5.2e-09	5.23414
WBGene00016907		C53H9.2	6.01e-07	2.38001	3.12e-08	5.20539
WBGene00017361		F10E9.12	2.17e-11	2.37881	5.47e-13	5.20108
WBGene00017583		F19B10.1	1.55e-13	2.37018	2.79e-15	5.17007
WBGene00013244		Y56A3A.33	1.68e-09	2.36815	5.48e-11	5.16277
WBGene00020999		W03F9.1	8.15e-23	2.36234	6.33e-25	5.14204
WBGene00219298		F55H2.8	0.00267095	2.35806	0.000348436	5.1268
WBGene00077684		Y26D4A.21	3.1e-08	2.35169	1.28e-09	5.10421
WBGene00014836		T09F5.12	1.45e-22	2.34958	1.16e-24	5.09676
WBGene00008577		F08G2.5	2.72e-14	2.34922	4.56e-16	5.09548
WBGene00017462		F14D2.14	1.38e-10	2.32925	3.75e-12	5.02542
WBGene00008916	clec-221	F17C11.5	3.1e-12	2.32363	6.74e-14	5.0059
WBGene00019468		K07B1.8	1.2e-09	2.32307	3.8e-11	5.00396
WBGene00010177		F57A8.1	4.73e-19	2.31565	5.13e-21	4.97827
WBGene00012140		T28F4.5	3.17e-14	2.3079	5.37e-16	4.9516
WBGene00044799		ZK686.6	0.000654098	2.2987	7e-05	4.92015
WBGene00000211	asm-1	B0252.2	7.62e-17	2.28718	1.01e-18	4.88101
WBGene00001031	dnj-13	F54D5.8	1.82e-26	2.27835	1.11e-28	4.85123
WBGene00020912		W01A11.7	2.38e-08	2.27788	9.47e-10	4.84965
WBGene00044180		C47E8.11	1.29e-07	2.27768	5.92e-09	4.84899
WBGene00006760	unc-23	H14N18.1	2.99e-21	2.27744	2.7e-23	4.84818
WBGene00020761		T24C4.5	1.92e-15	2.27552	2.94e-17	4.8417
WBGene00019070		F58H7.5	6.26e-05	2.27269	5.05e-06	4.83223
WBGene00000593	col-2	W01B6.7	0.00554267	2.27263	0.000814057	4.83202
WBGene00014963		Y105C5A.21	0.00324417	2.27146	0.000438156	4.8281
WBGene00019890		R05F9.6	4.36e-17	2.26945	5.59e-19	4.82141
WBGene00010244		F58D5.5	1.7e-17	2.26894	2.12e-19	4.81968
WBGene00002263	lea-1	K08H10.1	7.33e-17	2.2574	9.61e-19	4.78128
WBGene00019668	fil-2	K12B6.3	0.000194777	2.25259	1.8e-05	4.76537
WBGene00007656		C17H1.3	0.00241638	2.25231	0.000308772	4.76444
WBGene00007883		C33A12.4	1.2e-09	2.25012	3.81e-11	4.75721
WBGene00002024	hsp-43	C14F11.5	4.16e-18	2.24456	4.81e-20	4.73893
WBGene00016788		C49G7.10	4.57e-12	2.23774	1.01e-13	4.71657
WBGene00014773		F56D5.8	0.013607	2.22375	0.00235903	4.67106
WBGene00019639		K10F12.7	0.0014599	2.22233	0.000173319	4.66647
WBGene00019466	tos-1	K07B1.6	1.67e-11	2.21699	4.09e-13	4.64922
WBGene00012572		Y37H2B.1	0.000594966	2.21611	6.31e-05	4.64638
WBGene00015046	nlp-34	B0213.17	4.14e-10	2.21292	1.22e-11	4.63614
WBGene00009178	uggt-2	F26H9.8	5.17e-13	2.20882	1.01e-14	4.62296
WBGene00003970	pek-1	F46C3.1	3e-16	2.20609	4.18e-18	4.61422
WBGene00016760		C49A9.6	1.08e-12	2.20274	2.21e-14	4.60353
WBGene00017163	dnpp-1	F01F1.9	1.9e-20	2.20222	1.84e-22	4.60187
WBGene00012180		W01D2.3	5.28e-12	2.19616	1.19e-13	4.58258
WBGene00007235		C01G10.8	4.32e-19	2.19124	4.65e-21	4.56699
WBGene00018521		F46H5.5	3.68e-05	2.1867	2.81e-06	4.55262
WBGene00235093		C54F6.18	1.53e-06	2.18136	8.56e-08	4.53582
WBGene00010911		M106.3	2.53e-21	2.17666	2.26e-23	4.52106
WBGene00016061	hpo-15	C24G6.6	7.69e-18	2.17588	9.28e-20	4.51862
WBGene00016647	fbxc-4	C44C8.2	6.7e-14	2.17064	1.16e-15	4.50223
WBGene00016648	fbxc-2	C44C8.3	6.7e-14	2.17064	1.16e-15	4.50223
WBGene00019073	fbxc-3	F58H7.8	6.7e-14	2.17064	1.16e-15	4.50223
WBGene00011300		R107.5	2.26e-17	2.16282	2.83e-19	4.4779
WBGene00021843		Y54E10BR.4	3.33e-16	2.161	4.68e-18	4.47223
WBGene00044702		F46C3.4	0.00877931	2.15421	0.00138954	4.45126
WBGene00018069		F35H10.3	1.44e-09	2.15028	4.66e-11	4.43913
WBGene00019983	sti-1	R09E12.3	1.13e-20	2.13844	1.04e-22	4.40287
WBGene00020946		W02D7.11	0.00540504	2.13514	0.000790062	4.3928
WBGene00009999	srsx-35	F53F8.2	0.0146132	2.13098	0.00256326	4.38016
WBGene00219772	anr-53	Y119D3A.6	0.0150772	2.13098	0.0026659	4.38016
WBGene00010700	nipi-3	K09A9.1	3.96e-13	2.12859	7.63e-15	4.37291
WBGene00013636		Y105C5A.12	4.09e-07	2.11842	2.05e-08	4.34219
WBGene00020271		T05H4.8	0.0171808	2.11828	0.00313763	4.34176
WBGene00018711		F52G3.3	0.0102569	2.11486	0.00167986	4.33148
WBGene00006448	glod-4	C16C10.10	5.44e-18	2.1112	6.44e-20	4.32052
WBGene00000973	dhs-9	Y32H12A.3	2.8e-18	2.11064	3.19e-20	4.31883
WBGene00022289		Y75B7B.2	0.0040651	2.10895	0.000568828	4.31378
WBGene00021911		Y55B1BR.1	0.0218348	2.1063	0.00422023	4.30585
WBGene00019818		R02C2.7	0.000178532	2.09696	1.63e-05	4.27808
WBGene00007216		C01A2.4	8.15e-16	2.09436	1.2e-17	4.27038
WBGene00003799	npp-13	Y37E3.15	0.00202347	2.09203	0.000250819	4.26349
WBGene00004509	rrf-2	M01G12.12	4.72e-16	2.09011	6.71e-18	4.25782
WBGene00001030	dnj-12	F39B2.10	1.28e-20	2.08459	1.19e-22	4.24153
WBGene00200459		F38H4.15	0.0196372	2.0835	0.00369657	4.23834
WBGene00019529		K08D10.5	0.000160033	2.08324	1.44e-05	4.23759
WBGene00009588		F40F11.3	2.4e-10	2.08002	6.78e-12	4.22814
WBGene00003979	pes-5	T27D12.4	8.77e-06	2.07949	5.74e-07	4.22658
WBGene00021486	lbp-9	Y40B10A.1	7.02e-17	2.07892	9.16e-19	4.2249
WBGene00008850		F15B9.6	1.35e-09	2.07844	4.35e-11	4.22352
WBGene00012607		Y38F1A.4	1.3e-06	2.07581	7.19e-08	4.21581
WBGene00012965	fipr-17	Y48A6B.4	0.0262003	2.07478	0.00529866	4.21282
WBGene00007631	wht-3	C16C10.12	1.36e-09	2.07457	4.39e-11	4.21218
WBGene00017070	praf-3	D2096.2	6.49e-18	2.06949	7.75e-20	4.19739
WBGene00020481		T13C2.6	4.77e-20	2.06108	4.76e-22	4.17298
WBGene00198403		F15B9.12	0.0217177	2.05839	0.00419351	4.16521
WBGene00004131	pqn-44	F55A12.9	4.62e-19	2.05684	4.99e-21	4.16075
WBGene00077704		F12A10.9	0.0187166	2.05415	0.00347061	4.15298
WBGene00017161	rabn-5	F01F1.4	8.03e-19	2.05356	8.85e-21	4.1513
WBGene00007237		C01G10.10	2.21e-07	2.05264	1.06e-08	4.14863
WBGene00044772		T23E7.6	1.7e-06	2.0501	9.66e-08	4.14134
WBGene00006602	tps-1	ZK54.2	1.52e-12	2.04845	3.17e-14	4.13661
WBGene00016646	fbxc-5	C44C8.1	1.26e-12	2.03785	2.6e-14	4.10634
WBGene00016649	fbxc-1	C44C8.4	1.26e-12	2.03785	2.6e-14	4.10634
WBGene00013043	arrd-16	Y49E10.24	0.00885281	2.03611	0.00140215	4.10139
WBGene00002005	hsp-1	F26D10.3	4.12e-19	2.03249	4.41e-21	4.09111
WBGene00017698		F22B7.9	5.27e-12	2.02588	1.18e-13	4.07241
WBGene00021691		Y48G8AL.13	7.73e-14	2.02302	1.35e-15	4.06434
WBGene00004157	pqn-75	W03D2.1	0.000839302	2.02245	9.22e-05	4.06273
WBGene00017692		F22B7.1	6.02e-11	2.02225	1.58e-12	4.06217
WBGene00019982	srbc-58	R09E12.2	0.025882	2.021	0.00521148	4.05865
WBGene00020381		T09B4.7	2.68e-09	2.01657	9.11e-11	4.04622
WBGene00017728		F22H10.4	0.028273	2.01615	0.00583932	4.04504
WBGene00011735	hip-1	T12D8.8	7.38e-17	2.01592	9.72e-19	4.04439
WBGene00017965		F31F7.2	0.000163023	2.0143	1.48e-05	4.03984
WBGene00009205		F28C6.5	1.6e-16	2.01352	2.2e-18	4.03766
WBGene00010989		R03D7.2	3.31e-11	2.01234	8.41e-13	4.03437
WBGene00001577	gem-4	T12A7.1	3.25e-13	2.00864	6.23e-15	4.02403
WBGene00012980	efhd-1	Y48B6A.6	8.4e-13	2.00554	1.7e-14	4.0154
WBGene00012190		W02A2.5	0.0147982	2.00512	0.00260387	4.01421
WBGene00009101		F25B3.4	1.06e-12	2.00209	2.15e-14	4.00581
WBGene00219709	linc-37	K02F3.14	0.00174627	2.00097	0.000213569	4.00269
WBGene00007772	egrh-1	C27C12.2	1.8e-16	1.99908	2.48e-18	3.99745
WBGene00001493	frm-7	C51F7.1	8.86e-20	1.99889	8.98e-22	3.99692
WBGene00018353	fbxa-182	F42G2.4	5.39e-11	1.99844	1.4e-12	3.99567
WBGene00009180	nurf-1	F26H11.2	3.45e-19	1.99114	3.64e-21	3.9755
WBGene00011501	rmd-1	T05G5.7	2.88e-14	1.9887	4.84e-16	3.96878
WBGene00019202		H14N18.2	0.0212572	1.98492	0.00407882	3.95842
WBGene00022181	pho-9	Y71H2AM.16	1.02e-17	1.9842	1.23e-19	3.95644
WBGene00006775	unc-39	F56A12.1	0.00494449	1.98024	0.000714217	3.94559
WBGene00206356		T08B2.15	0.00896515	1.97462	0.00142439	3.93025
WBGene00011230	nud-2	R11A5.2	2.68e-18	1.97422	3.04e-20	3.92917
WBGene00008503		F01G4.4	1.25e-11	1.97101	2.97e-13	3.92043
WBGene00001431	fkb-6	F31D4.3	5.32e-17	1.96284	6.88e-19	3.89828
WBGene00003148	mbf-1	H21P03.1	5.34e-18	1.9563	6.29e-20	3.88066
WBGene00020059	srab-15	R13D11.5	0.0380085	1.95035	0.00846775	3.86469
WBGene00005818	srw-71	F18E3.6	0.0311148	1.9499	0.00659252	3.86348
WBGene00016845		C50F7.5	0.0259884	1.94656	0.00524006	3.85456
WBGene00219654	linc-156	C30F8.7	0.0332051	1.94544	0.00714883	3.85155
WBGene00009702		F44F4.3	3.48e-08	1.94524	1.44e-09	3.85103
WBGene00003695	nhr-105	C06G3.1	9.83e-13	1.94179	2e-14	3.84183
WBGene00013331		Y57G11C.42	0.00158277	1.9367	0.000190871	3.8283
WBGene00022092		Y69A2AR.21	1.29e-13	1.93396	2.3e-15	3.82103
WBGene00012872		Y45F10B.8	0.00731861	1.93279	0.0011265	3.81792
WBGene00010348		H01G02.1	2.46e-12	1.92985	5.28e-14	3.81017
WBGene00019490		K07E3.1	1.49e-12	1.92784	3.11e-14	3.80486
WBGene00005650	srp-9	F09C6.5	0.000267009	1.92714	2.56e-05	3.80301
WBGene00021206		Y17G9B.9	2.5e-08	1.9269	9.99e-10	3.80237
WBGene00017456		F14D2.8	1.59e-07	1.92634	7.53e-09	3.8009
WBGene00045457		F33H12.7	2.08e-08	1.92551	8.11e-10	3.79872
WBGene00017270	numr-1	F08F8.5	5.29e-08	1.92393	2.28e-09	3.79456
WBGene00021352		Y37E3.11	0.00090777	1.92373	0.000100822	3.79403
WBGene00021352		Y37E3.11	0.00090777	1.92373	0.000100822	3.79403
WBGene00010874		M05D6.1	7.5e-10	1.92355	2.31e-11	3.79356
WBGene00013331		Y57G11C.42	0.00285617	1.92333	0.000376822	3.79297
WBGene00011105		R07E3.4	8.88e-11	1.92241	2.36e-12	3.79056
WBGene00001909	his-35	C50F4.13	1.9e-15	1.92012	2.89e-17	3.78455
WBGene00007908		C34B4.3	8.02e-08	1.91689	3.57e-09	3.77609
WBGene00008308		C54E10.3	0.0339896	1.91637	0.00736641	3.77473
WBGene00000932	dao-6	T05G5.12	1.92e-06	1.91313	1.09e-07	3.76627
WBGene00016997	cebp-1	D1005.3	2.19e-08	1.91073	8.59e-10	3.75999
WBGene00007237		C01G10.10	1.41e-07	1.90889	6.56e-09	3.75521
WBGene00022156		Y71G12B.18	0.045969	1.9065	0.0107578	3.749
WBGene00219609	linc-7	T22E6.2	6.23e-12	1.90456	1.41e-13	3.74394
WBGene00014979		ZC47.11	0.00609063	1.90326	0.000910306	3.74056
WBGene00009729		F45E10.2	2.64e-06	1.90258	1.54e-07	3.73881
WBGene00012552	enu-3.5	Y37D8A.12	3.03e-10	1.89989	8.74e-12	3.73184
WBGene00004460	rpn-3	C30C11.2	2.33e-18	1.8997	2.63e-20	3.73136
WBGene00008306		C54E10.1	0.0112936	1.89592	0.00188952	3.72159
WBGene00003252	mig-21	F01F1.13	0.00338059	1.89566	0.000459634	3.72093
WBGene00014760		F46A8.2	0.0476508	1.89565	0.0112512	3.7209
WBGene00009773	lipl-2	F46B6.8	8.88e-06	1.89222	5.82e-07	3.71207
WBGene00009853	arrd-27	F48F7.8	0.000682668	1.89179	7.33e-05	3.71097
WBGene00019243	fbxb-72	H24O09.2	0.0292481	1.88563	0.00611806	3.69514
WBGene00197520		C05C8.10	0.022778	1.88456	0.00446098	3.6924
WBGene00017061	oac-12	D2063.2	0.022497	1.87296	0.00438529	3.66282
WBGene00000535	cpi-1	K08B4.6	5.52e-13	1.87101	1.08e-14	3.65788
WBGene00016265	nmur-4	C30F12.6	8.69e-10	1.87051	2.71e-11	3.65663
WBGene00044030		Y17G7B.23	0.0330968	1.86589	0.00711545	3.64492
WBGene00002232	kpc-1	F11A6.1	1.35e-12	1.86485	2.8e-14	3.6423
WBGene00009695		F44F1.3	3.22e-06	1.86459	1.94e-07	3.64165
WBGene00000422	ced-8	F08F1.5	0.00441486	1.86268	0.000624822	3.63682
WBGene00010057		F54D5.15	9.58e-10	1.86141	3.01e-11	3.63362
WBGene00010260	ddx-17	F58E10.3	7.68e-16	1.85977	1.13e-17	3.62951
WBGene00206489		F53F1.14	0.000111642	1.85365	9.55e-06	3.61413
WBGene00219729	anr-44	T09A12.7	0.0205883	1.85186	0.00392212	3.60965
WBGene00008496		F01D5.6	1.34e-13	1.8503	2.4e-15	3.60574
WBGene00002269	lec-6	Y55B1AR.1	6.69e-16	1.84899	9.69e-18	3.60249
WBGene00012320	srxa-3	W07A8.4	0.0111938	1.8488	0.00187098	3.60201
WBGene00045242		C05B5.11	0.0442107	1.84694	0.0102124	3.59736
WBGene00006699	uba-1	C47E12.5	6.41e-13	1.84475	1.26e-14	3.5919
WBGene00007218		C01A2.6	0.00323489	1.84464	0.00043644	3.59164
WBGene00022111		Y71F9AL.6	0.0235866	1.84427	0.00464404	3.59071
WBGene00200561		C10C6.11	0.0272452	1.8442	0.00556017	3.59054
WBGene00006781	unc-45	F30H5.1	1.1e-13	1.83754	1.94e-15	3.574
WBGene00022872		ZK1240.8	0.00224904	1.83597	0.0002846	3.57012
WBGene00219587	anr-16	F29G6.5	0.001521	1.83376	0.000182416	3.56464
WBGene00002130	inx-8	ZK792.2	1.36e-11	1.82116	3.27e-13	3.53366
WBGene00044034		Y38E10A.28	0.00588122	1.82031	0.00087475	3.53156
WBGene00023262		C54F6.2	0.00137685	1.81922	0.000162093	3.5289
WBGene00000082	adt-1	C02B4.1	3.87e-10	1.81862	1.13e-11	3.52743
WBGene00017563		F18C5.10	1.48e-14	1.81693	2.42e-16	3.52332
WBGene00017908		F28H1.1	2.29e-09	1.81661	7.65e-11	3.52253
WBGene00199137		B0547.34	1.94e-06	1.81599	1.11e-07	3.52102
WBGene00012139		T28F4.4	7.02e-13	1.81441	1.39e-14	3.51715
WBGene00016247		C30B5.6	1.8e-11	1.80967	4.42e-13	3.50563
WBGene00013380		Y62E10A.14	4.26e-08	1.80843	1.8e-09	3.5026
WBGene00014755		F40F12.8	4.64e-08	1.80767	1.97e-09	3.50076
WBGene00009957		F53B2.8	1.57e-07	1.80756	7.41e-09	3.5005
WBGene00012961		Y47H10A.5	8.16e-08	1.80148	3.63e-09	3.48577
WBGene00219976		F55H12.9	0.0203749	1.80117	0.00387423	3.48502
WBGene00201964		F25D1.11	0.0279013	1.79973	0.00574105	3.48154
WBGene00017323	mps-4	F09G8.9	0.062618	1.79675	0.0160995	3.47436
WBGene00011299	ikke-1	R107.4	2.54e-13	1.79566	4.71e-15	3.47173
WBGene00003589	nex-2	T07C4.9	3.16e-11	1.79176	8.01e-13	3.46238
WBGene00018023	set-11	F34D6.4	0.0306637	1.79069	0.00648006	3.4598
WBGene00008144	gasr-8	C47E8.6	0.021243	1.78665	0.00407493	3.45013
WBGene00219902		F18C5.15	0.0255611	1.78556	0.0051201	3.44752
WBGene00000780	cpn-4	F49D11.8	2.31e-12	1.78527	4.92e-14	3.44683
WBGene00007304	ttr-39	C04G2.1	2.65e-06	1.78175	1.55e-07	3.43843
WBGene00010232		F58B3.6	1.38e-11	1.78164	3.33e-13	3.43818
WBGene00016457		C35E7.5	0.0131589	1.78013	0.0022712	3.43458
WBGene00018730		F53A9.7	1.07e-09	1.77943	3.37e-11	3.43291
WBGene00011772		T14G8.4	5.66e-05	1.7769	4.5e-06	3.42688
WBGene00006611	tre-5	C23H3.7	5.38e-07	1.77501	2.76e-08	3.4224
WBGene00007667	fbxa-97	C18B12.5	0.00167116	1.77021	0.000203095	3.41104
WBGene00012409		Y7A5A.3	0.0675038	1.76636	0.0177499	3.40194
WBGene00044495		Y54G2A.40	4.04e-05	1.76165	3.1e-06	3.39087
WBGene00008852	ubql-1	F15C11.2	1.5e-15	1.75932	2.24e-17	3.38539
WBGene00018561	gadr-3	F47D12.5	0.0104534	1.75751	0.00171958	3.38113
WBGene00009382		F34H10.5	0.0303137	1.75353	0.0063894	3.37183
WBGene00006923	vhp-1	F08B1.1	6.9e-13	1.75294	1.36e-14	3.37044
WBGene00015218		B0507.1	2.98e-08	1.7519	1.22e-09	3.36802
WBGene00019232	ugt-13	H23N18.1	4.5e-09	1.75029	1.6e-10	3.36427
WBGene00004987	spp-2	T08A9.12	1.44e-07	1.74981	6.7e-09	3.36315
WBGene00010475		K01F9.2	2.04e-09	1.7497	6.78e-11	3.36288
WBGene00013837	fbxa-30	ZC47.4	0.000121135	1.74949	1.05e-05	3.3624
WBGene00004153	pqn-71	T23F1.6	1.47e-07	1.74757	6.83e-09	3.35792
WBGene00010877	lact-4	M05D6.4	2.97e-08	1.74713	1.22e-09	3.3569
WBGene00009534		F38B7.3	1.1e-08	1.74456	4.09e-10	3.35092
WBGene00008841		F15A4.6	3.59e-08	1.74071	1.5e-09	3.34199
WBGene00011608		T08D2.3	1.36e-07	1.74018	6.26e-09	3.34076
WBGene00016088	clec-266	C25B8.4	0.0230699	1.74007	0.00453594	3.34051
WBGene00012813		Y43F8B.2	7.35e-13	1.73497	1.47e-14	3.32872
WBGene00013381	cyp-31A5	Y62E10A.15	2.95e-07	1.73357	1.46e-08	3.3255
WBGene00009947		F52H3.5	5.04e-10	1.73334	1.52e-11	3.32496
WBGene00009974		F53C11.4	7.49e-14	1.73317	1.31e-15	3.32458
WBGene00017440	upb-1	F13H8.7	6.89e-10	1.7315	2.11e-11	3.32072
WBGene00007362	cyp-35C1	C06B3.3	6.17e-05	1.72984	4.97e-06	3.31691
WBGene00005292	srh-71	T10D4.5	0.0133218	1.72919	0.00230225	3.31542
WBGene00013789		Y116A8C.9	1.97e-09	1.72919	6.53e-11	3.31542
WBGene00010092		F55C5.2	2.44e-10	1.72731	6.95e-12	3.31111
WBGene00018989		F56F11.2	6.1e-08	1.72557	2.64e-09	3.3071
WBGene00014731		F02E9.8	0.00691449	1.72436	0.0010563	3.30433
WBGene00009900		F49E12.7	0.0737176	1.72381	0.0199726	3.30308
WBGene00000056	acr-17	F53E10.2	0.00645888	1.72346	0.000975664	3.30228
WBGene00019719		M01H9.3	2.36e-08	1.71826	9.35e-10	3.29039
WBGene00045386		C02B4.4	0.000780236	1.71711	8.51e-05	3.28777
WBGene00007460		C08F11.13	6.66e-07	1.71588	3.48e-08	3.28497
WBGene00008735		F13D2.1	8.63e-10	1.71579	2.68e-11	3.28476
WBGene00010585		K05C4.9	1.21e-06	1.71543	6.63e-08	3.28394
WBGene00023271		F19G12.t1	0.064307	1.71477	0.0166471	3.28245
WBGene00219907		F19H8.7	0.0612043	1.71418	0.0156383	3.28111
WBGene00008943	srz-36	F19B2.4	0.0279416	1.7137	0.00575339	3.28
WBGene00206465		F57A8.10	0.00258688	1.71093	0.000334903	3.27371
WBGene00007632		C16C10.13	0.0020273	1.70909	0.000251625	3.26955
WBGene00012721		Y39E4B.13	1.59e-05	1.70767	1.11e-06	3.26634
WBGene00020262	ferl-1	T05E8.1	0.0100828	1.70709	0.00164195	3.26501
WBGene00010546		K03H1.11	2.63e-08	1.707	1.06e-09	3.26481
WBGene00000763	coq-3	Y57G11C.11	0.00917452	1.70579	0.00146827	3.26209
WBGene00010481		K01G5.10	8.77e-09	1.70514	3.21e-10	3.26061
WBGene00005511	srh-307	Y59A8B.5	0.0810232	1.70077	0.0226527	3.25075
WBGene00044280		W02A2.9	1.84e-05	1.69898	1.3e-06	3.24671
WBGene00014852		W02A11.6	0.0034591	1.69775	0.000472215	3.24394
WBGene00004169	pqn-89	Y73B6BR.1	1.38e-13	1.69646	2.48e-15	3.24105
WBGene00012603	nspe-6	Y38E10A.25	0.00278793	1.69571	0.000366153	3.23936
WBGene00001443	fli-1	B0523.5	2.7e-12	1.69515	5.83e-14	3.2381
WBGene00008403		D2013.3	2.96e-05	1.69213	2.21e-06	3.23133
WBGene00021044		W05H7.1	1e-06	1.69018	5.41e-08	3.22698
WBGene00019782		M60.7	0.0495663	1.68943	0.0118618	3.2253
WBGene00011219	srxa-10	R10E11.7	0.0714753	1.68754	0.0191879	3.22108
WBGene00011642		T09B9.1	0.000130646	1.68435	1.15e-05	3.21396
WBGene00000379	cct-4	K01C8.10	3.41e-12	1.68169	7.48e-14	3.20804
WBGene00004118	pqn-29	F10F2.9	3.44e-08	1.6809	1.42e-09	3.20627
WBGene00020007		R11F4.1	1.81e-10	1.68063	5.07e-12	3.20567
WBGene00001160	efk-1	F42A10.4	2.37e-09	1.67828	7.96e-11	3.20047
WBGene00000968	dhs-4	T05F1.10	9.88e-06	1.67703	6.52e-07	3.1977
WBGene00000380	cct-5	C07G2.3	8.67e-11	1.67548	2.29e-12	3.19425
WBGene00007913	cyp-36A1	C34B7.3	1.37e-09	1.67522	4.45e-11	3.19368
WBGene00219701	anr-34	F54F2.12	0.0338524	1.67411	0.00732549	3.19123
WBGene00199485		M117.11	0.0710209	1.6725	0.0190151	3.18767
WBGene00018874	tag-234	F55C12.7	3.19e-06	1.67041	1.91e-07	3.18304
WBGene00001912	his-38	K03A1.6	0.00317361	1.66822	0.000426948	3.17823
WBGene00002980	lgg-1	C32D5.9	2.85e-09	1.66288	9.72e-11	3.16648
WBGene00020030		R12E2.1	1.67e-10	1.66164	4.64e-12	3.16376
WBGene00013079	ttr-26	Y51A2D.11	4.07e-10	1.6598	1.19e-11	3.15973
WBGene00012268		W04G5.8	0.0713736	1.65884	0.019137	3.15762
WBGene00008247	srsx-26	C51E3.1	0.0815741	1.65763	0.0228607	3.15497
WBGene00021977		Y58A7A.3	1.2e-06	1.65756	6.56e-08	3.15483
WBGene00017420		F13B9.2	4.4e-08	1.65693	1.86e-09	3.15344
WBGene00021053	gadr-4	W06A11.2	0.021072	1.65218	0.00403468	3.14308
WBGene00016315		C32D5.7	2.93e-07	1.6515	1.45e-08	3.14161
WBGene00197733		T25C12.5	0.0936092	1.65054	0.027379	3.13952
WBGene00219592	linc-84	F55H12.8	0.00992638	1.64906	0.00161101	3.1363
WBGene00001037	dnj-19	T05C3.5	1.47e-12	1.64869	3.06e-14	3.13549
WBGene00021331	glrx-10	Y34D9A.6	5.32e-12	1.64842	1.2e-13	3.13489
WBGene00017219		F07F6.7	0.00145336	1.64626	0.000172462	3.13021
WBGene00019831		R02F2.1	2.31e-06	1.64437	1.34e-07	3.1261
WBGene00012467	arrd-8	Y17G7B.14	0.00571423	1.64386	0.000844606	3.12501
WBGene00003821	nst-1	K01C8.9	2.71e-13	1.64279	5.07e-15	3.12268
WBGene00003891	osm-11	F11C7.5	6.51e-13	1.64248	1.28e-14	3.12203
WBGene00001910		C50F4.6	1.04e-05	1.64101	6.86e-07	3.11884
WBGene00189995		C06E7.88	0.00728624	1.64061	0.00112071	3.11798
WBGene00044225		C38D4.10	0.0184997	1.63605	0.00342436	3.10814
WBGene00200809		T04C12.28	0.0883862	1.63136	0.0254125	3.09805
WBGene00008975		F20D1.3	4.59e-06	1.63125	2.84e-07	3.09782
WBGene00197534		F38H4.13	0.0984961	1.63014	0.0293448	3.09544
WBGene00008609		F09B12.5	0.0598332	1.62311	0.0151726	3.08038
WBGene00199753		Y97E10B.12	0.0867654	1.62201	0.0248748	3.07803
WBGene00007571		C14A6.7	0.099425	1.61699	0.029689	3.06735
WBGene00018804		F54D10.3	1.64e-06	1.61332	9.25e-08	3.05955
WBGene00010882	atg-7	M7.5	4.56e-11	1.61102	1.18e-12	3.05467
WBGene00010409		H21P03.2	3.51e-09	1.60926	1.22e-10	3.05096
WBGene00008497		F01D5.7	1.25e-06	1.60741	6.84e-08	3.04704
WBGene00016961	vps-32.1	C56C10.3	1.8e-11	1.60698	4.41e-13	3.04614
WBGene00044410		F48E8.8	0.000740484	1.6044	8.01e-05	3.04069
WBGene00021201		Y17G9B.4	0.01083	1.6018	0.00179526	3.03522
WBGene00219572	linc-146	C51E3.13	0.056298	1.6016	0.0140125	3.03479
WBGene00009975		F53C11.5	1.36e-12	1.60142	2.83e-14	3.03443
WBGene00017559	mpz-3	F18C5.4	1.04e-05	1.60117	6.89e-07	3.0339
WBGene00012623	fbxa-149	Y38H6C.10	0.000267159	1.59479	2.57e-05	3.02052
WBGene00006698	uaf-2	Y116A8C.35	2.45e-10	1.5946	6.99e-12	3.02012
WBGene00015176	vps-51	B0414.8	8.76e-11	1.59338	2.32e-12	3.01756
WBGene00007124		B0250.7	0.104468	1.59322	0.0317802	3.01723
WBGene00015517		C06A8.8	1.59e-07	1.59235	7.55e-09	3.0154
WBGene00000502	chp-1	Y110A7A.13	1.94e-11	1.59165	4.8e-13	3.01394
WBGene00007351		C05G5.5	0.0872674	1.59075	0.0250283	3.01207
WBGene00016128	elpc-4	C26B2.6	1.99e-10	1.59068	5.57e-12	3.01191
WBGene00006684	twk-32	F53C11.6	0.0965213	1.58998	0.0286022	3.01045
WBGene00010314		F59B2.12	0.0781001	1.58846	0.0215698	3.00727
WBGene00002131	inx-9	ZK792.3	4.66e-07	1.58684	2.36e-08	3.00391
WBGene00008037		C40C9.4	0.0960451	1.58618	0.0283719	3.00253
WBGene00010470	cdr-4	K01D12.11	1.07e-10	1.5842	2.88e-12	2.99841
WBGene00010006		F53H2.3	0.00205119	1.58333	0.000255042	2.9966
WBGene00010940		M163.8	0.00892744	1.58163	0.00141594	2.99308
WBGene00017019		D1014.6	0.108666	1.58119	0.0335216	2.99216
WBGene00005825	srw-78	F18E3.9	0.102864	1.58044	0.0311278	2.99061
WBGene00008398		D2005.3	4.31e-10	1.57296	1.28e-11	2.97514
WBGene00206469		F58D2.5	0.0792635	1.57293	0.0219861	2.97509
WBGene00007689		C18E9.9	2.96e-09	1.57051	1.02e-10	2.9701
WBGene00022484	fbxa-77	Y119D3B.6	4.19e-06	1.56983	2.58e-07	2.96869
WBGene00009866		F49C5.3	0.105821	1.56941	0.0323689	2.96783
WBGene00015973		C18E3.4	0.0800323	1.56761	0.0222919	2.96414
WBGene00003168	mec-4	T01C8.7	0.0037329	1.56534	0.000515557	2.95947
WBGene00020118		R155.4	0.000197335	1.56512	1.82e-05	2.95902
WBGene00194713		F19B10.13	0.00909337	1.56492	0.00145058	2.95861
WBGene00002211	kin-30	M01B2.1	0.00261342	1.56061	0.00033906	2.94979
WBGene00003543	nas-24	F20G2.4	0.0198658	1.55834	0.00375165	2.94515
WBGene00021489		Y40B10A.4	0.00106826	1.55639	0.000121938	2.94118
WBGene00004236	ptr-22	Y80D3A.7	9.05e-06	1.55377	5.94e-07	2.93584
WBGene00017225	fbxa-52	F07G6.6	0.0208778	1.5529	0.00398416	2.93406
WBGene00023104		K10F12.8	0.102278	1.55185	0.0308772	2.93193
WBGene00021354	fpn-1.1	Y37E3.16	3.65e-09	1.55078	1.27e-10	2.92975
WBGene00006706	ubc-9	F29B9.6	1.1e-11	1.55013	2.6e-13	2.92844
WBGene00021011		W03G1.5	0.0100932	1.54788	0.00164587	2.92387
WBGene00007484		C09G1.2	0.109009	1.54739	0.0336601	2.92288
WBGene00009405		F35C11.6	1.59e-05	1.54259	1.11e-06	2.91317
WBGene00021244		Y22D7AL.4	0.0344201	1.54236	0.00748815	2.91271
WBGene00017385		F11G11.5	2.37e-09	1.5383	7.94e-11	2.90451
WBGene00009935		F52E10.4	0.00046904	1.53747	4.84e-05	2.90285
WBGene00005517	sri-5	F28D9.2	0.0728088	1.53442	0.0196331	2.89672
WBGene00008366	tpra-1	D1046.5	1.91e-09	1.5338	6.29e-11	2.89548
WBGene00044070	set-18	T22A3.4	9.97e-08	1.53233	4.51e-09	2.89253
WBGene00044348		Y71G12B.31	0.00477306	1.52816	0.000683932	2.88417
WBGene00005748	srw-1	Y75B12B.7	0.1018	1.52701	0.0306811	2.88188
WBGene00019280		K01A2.5	5.93e-09	1.52511	2.13e-10	2.87809
WBGene00020179		T02H6.9	0.109767	1.52422	0.0339906	2.87631
WBGene00008572		F08B12.4	7.89e-09	1.5238	2.88e-10	2.87547
WBGene00011104	cut-5	R07E3.3	0.0011694	1.51891	0.000134643	2.86575
WBGene00219563	linc-95	C32A3.8	0.00459837	1.51603	0.00065586	2.86003
WBGene00007322		C05B5.5	0.0191156	1.51555	0.00356364	2.85908
WBGene00010977		R02D5.3	7.55e-07	1.51296	3.95e-08	2.85394
WBGene00012389		Y6B3B.4	1.59e-07	1.5117	7.5e-09	2.85146
WBGene00003602	nhr-3	H01A20.1	1.26e-06	1.5084	6.92e-08	2.84495
WBGene00219615	linc-109	W09D10.7	0.0003981	1.50541	4.06e-05	2.83906
WBGene00006470	tag-120	F40F9.2	4.53e-09	1.50447	1.62e-10	2.8372
WBGene00011984		T24C2.5	0.000263894	1.50296	2.53e-05	2.83424
WBGene00011209		R10E8.3	1.47e-06	1.50279	8.13e-08	2.83391
WBGene00006623	try-5	K07B1.1	0.00477599	1.50135	0.000684615	2.83108
WBGene00008263		C53A5.2	0.0984882	1.5013	0.029337	2.83098
WBGene00044758		Y37H2A.12	0.000104726	1.50089	8.9e-06	2.83016
WBGene00016669	ilys-2	C45G7.2	0.111294	1.50075	0.0346743	2.8299
WBGene00219681	anr-6	F25B4.17	0.0714753	1.49918	0.0191857	2.82681
WBGene00012189		W02A2.4	2.35e-05	1.49709	1.7e-06	2.82272
WBGene00012212		W02D9.6	0.00869874	1.49698	0.00137439	2.82252
WBGene00016561	eri-6	C41D11.1	0.00268234	1.49441	0.000350513	2.8175
WBGene00009078	rpb-12	F23B2.13	5.65e-07	1.49365	2.91e-08	2.816
WBGene00017482	set-9	F15E6.1	8.52e-08	1.4921	3.81e-09	2.81298
WBGene00012101	zip-10	T27F2.4	1.93e-05	1.49068	1.37e-06	2.81021
WBGene00000121	aly-2	F23B2.6	3.63e-10	1.49018	1.06e-11	2.80924
WBGene00219650	linc-56	C14A11.12	0.0429483	1.48988	0.0098498	2.80866
WBGene00017336	ugt-41	F10D2.11	0.000478185	1.48687	4.95e-05	2.8028
WBGene00195043		Y57G11C.1135	0.0337859	1.48665	0.00730366	2.80237
WBGene00044587	srz-105	K03D3.12	0.134415	1.48532	0.0446742	2.79979
WBGene00019976	fbxa-195	R09B5.1	0.0585219	1.48391	0.0147369	2.79705
WBGene00014907	fbxa-117	Y51A2A.9	0.0469673	1.48063	0.0110474	2.79071
WBGene00006649	tth-1	F08F1.8	1.65e-08	1.4793	6.3e-10	2.78814
WBGene00017422		F13C5.1	0.0138508	1.47856	0.00241352	2.78671
WBGene00022454		Y110A7A.2	0.0778327	1.47828	0.021482	2.78615
WBGene00016923		C54F6.5	0.0164177	1.47824	0.00296753	2.78608
WBGene00011360	lgc-18	T01H10.7	0.130752	1.47722	0.0431829	2.78412
WBGene00012457	acbp-6	Y17G7B.1	0.00318959	1.47674	0.000429684	2.78319
WBGene00020073	sdz-28	R52.1	0.0740822	1.47615	0.0200959	2.78204
WBGene00019625		K10C9.4	0.141799	1.47549	0.0479187	2.78078
WBGene00019393	irld-45	K04F1.14	0.128243	1.47527	0.042086	2.78036
WBGene00012475		Y18D10A.2	0.142793	1.47386	0.0483946	2.77765
WBGene00016310		C32D5.1	0.000954227	1.47265	0.000106826	2.77532
WBGene00014196		ZK1053.1	0.0554645	1.47117	0.0137409	2.77246
WBGene00021339		Y34F4.4	1.02e-05	1.47035	6.75e-07	2.77089
WBGene00219983		F58D5.11	0.053429	1.46976	0.0131129	2.76975
WBGene00020318		T07F8.1	0.0325488	1.46844	0.00696987	2.76722
WBGene00044472	dct-8	F56D6.10	0.0492892	1.46622	0.0117635	2.76298
WBGene00000683	col-109	Y38C1BA.3	1.8e-08	1.46533	6.92e-10	2.76126
WBGene00007624	hrde-1	C16C10.3	1.01e-05	1.459	6.67e-07	2.74919
WBGene00194934		ZK809.9	0.0225645	1.45794	0.00441046	2.74716
WBGene00002010	hsp-6	C37H5.8	4.4e-09	1.45063	1.56e-10	2.73327
WBGene00009951		F53A2.3	0.0220712	1.45037	0.00428365	2.73277
WBGene00003989	pfn-1	Y18D10A.20	1.24e-09	1.45018	3.96e-11	2.73242
WBGene00001763	gst-15	F37B1.4	0.010492	1.44899	0.00172882	2.73017
WBGene00014014		ZK632.5	4.42e-08	1.44811	1.87e-09	2.7285
WBGene00021050		W05H9.3	1.73e-07	1.44658	8.2e-09	2.7256
WBGene00016785		C49G7.7	0.00263291	1.44622	0.000342168	2.72493
WBGene00007390	lmtr-3	C06H2.6	0.0600265	1.44539	0.0152282	2.72336
WBGene00007779		C27D8.3	3.06e-08	1.44519	1.26e-09	2.72298
WBGene00012576		Y37H9A.1	5.63e-06	1.44178	3.57e-07	2.71655
WBGene00005657	srr-6	C13D9.1	0.000971804	1.44123	0.000108948	2.71553
WBGene00011040		R05H5.5	1.31e-06	1.4402	7.2e-08	2.71358
WBGene00008464		E02H4.6	0.0879599	1.43571	0.0252512	2.70516
WBGene00020795		T25D1.3	0.0321535	1.4354	0.00687106	2.70456
WBGene00016305	fbxc-57	C32B5.12	0.0772982	1.43499	0.0212877	2.7038
WBGene00007890		C33A12.19	1.81e-05	1.43294	1.28e-06	2.69997
WBGene00012158	ucr-2.1	VW06B3R.1	2.17e-07	1.43222	1.04e-08	2.69862
WBGene00010176		F56H11.6	0.157571	1.43111	0.05553	2.69654
WBGene00012840	grsp-1	Y43F8C.20	2.17e-05	1.43049	1.56e-06	2.69539
WBGene00045148		C06A1.8	0.152644	1.42809	0.0530284	2.6909
WBGene00017396		F12A10.7	0.0929263	1.428	0.0271171	2.69074
WBGene00000247	bec-1	T19E7.3	2.14e-08	1.42645	8.36e-10	2.68785
WBGene00021253		Y22D7AL.15	9.83e-08	1.42377	4.44e-09	2.68285
WBGene00220001		K02F3.15	0.161098	1.42325	0.0571765	2.68188
WBGene00021526		Y41G9A.2	0.00173951	1.42313	0.000212551	2.68167
WBGene00020859	bath-25	T27C10.4	0.0089308	1.4229	0.00141719	2.68124
WBGene00000672	col-97	ZK1010.7	8.5e-06	1.42105	5.55e-07	2.6778
WBGene00013637		Y105C5A.13	0.0970809	1.42097	0.0288162	2.67766
WBGene00011741		T12G3.6	0.000315123	1.42033	3.1e-05	2.67647
WBGene00219734	linc-128	T21H3.11	0.0615312	1.41985	0.0157455	2.67557
WBGene00023458		M02E1.3	0.00287207	1.41882	0.000379419	2.67367
WBGene00017627		F20B6.1	0.130754	1.41701	0.043191	2.67031
WBGene00011039		R05H5.4	1.66e-06	1.41404	9.38e-08	2.66483
WBGene00017075	nap-1	D2096.8	7.58e-10	1.41317	2.34e-11	2.66322
WBGene00012332		W07G1.5	0.102552	1.41301	0.0309826	2.66291
WBGene00023106		K11H12.t1	0.16306	1.41152	0.058166	2.66017
WBGene00016014		C23G10.7	7.21e-09	1.40755	2.62e-10	2.65286
WBGene00019928	clec-44	R07C3.12	0.164358	1.40502	0.0588636	2.64822
WBGene00010053		F54D5.9	1.21e-07	1.4045	5.53e-09	2.64725
WBGene00000174	aqp-6	C32C4.2	0.0450101	1.40414	0.0104624	2.64661
WBGene00008777		F13H10.6	1.34e-06	1.40408	7.43e-08	2.64649
WBGene00021865	fbxa-66	Y54F10BM.11	0.0254405	1.40393	0.00508474	2.64622
WBGene00195017		R144.15	0.164815	1.40359	0.0590543	2.64559
WBGene00044141		H03G16.6	0.163473	1.40096	0.0584116	2.64078
WBGene00012273		W05B2.7	0.000151158	1.40067	1.35e-05	2.64024
WBGene00021239		Y20F4.4	8.57e-07	1.40038	4.55e-08	2.6397
WBGene00002093	ins-10	T08G5.12	0.104598	1.39773	0.0318368	2.63487
WBGene00012684		Y39B6A.25	4.34e-05	1.39756	3.36e-06	2.63455
WBGene00010362	enu-3.1	H04D03.1	4.08e-06	1.39698	2.5e-07	2.63349
WBGene00013568		Y75B12B.3	0.00498307	1.39614	0.000720612	2.63196
WBGene00001941	his-67	T23D8.5	0.108413	1.39418	0.0334222	2.62839
WBGene00013764		Y113G7B.15	0.0788046	1.39375	0.0218371	2.62761
WBGene00021451	mltn-8	Y39D8B.3	0.0549124	1.39215	0.0135859	2.62469
WBGene00003415	mars-1	F58B3.5	0.000282038	1.38896	2.73e-05	2.61891
WBGene00015229	fbxa-125	B0511.3	0.000425428	1.38859	4.35e-05	2.61823
WBGene00012321	srxa-6	W07A8.5	0.133314	1.38845	0.0442053	2.61798
WBGene00017247		F08D12.3	0.00261166	1.38804	0.000338687	2.61723
WBGene00020031	suco-1	R12E2.2	2.01e-07	1.38707	9.62e-09	2.61546
WBGene00009102		F25B3.5	0.000216998	1.38671	2.04e-05	2.61481
WBGene00219322		C33C12.12	0.107932	1.38625	0.0331787	2.61399
WBGene00197335		C05D2.14	0.174664	1.38514	0.0640846	2.61198
WBGene00016469		C36B7.6	1.37e-08	1.38229	5.18e-10	2.60682
WBGene00000378	cct-2	T21B10.7	1.2e-06	1.38217	6.54e-08	2.60659
WBGene00206486		Y54F10BM.20	0.175469	1.38202	0.0645151	2.60634
WBGene00010401		H16D19.3	0.141799	1.38201	0.0479329	2.60631
WBGene00011313		T01B7.8	0.000365229	1.38142	3.68e-05	2.60524
WBGene00007324		C05B5.8	0.00122073	1.3813	0.000141562	2.60502
WBGene00019760	calu-1	M03F4.7	1.93e-07	1.3773	9.24e-09	2.59781
WBGene00023284		F41B5.1	0.0191517	1.37597	0.00357247	2.59543
WBGene00020829		T26C11.3	0.123787	1.37457	0.0399879	2.59291
WBGene00007630	har-1	C16C10.11	7.65e-07	1.37412	4.01e-08	2.5921
WBGene00020899		T28D9.11	0.178302	1.37399	0.0660159	2.59186
WBGene00001554	gcy-34	M04G12.3	0.0303209	1.37366	0.00639259	2.59127
WBGene00000659	col-84	K12D12.3	0.0798832	1.37345	0.0222064	2.59089
WBGene00019938		R07E4.5	0.000150399	1.37333	1.34e-05	2.59068
WBGene00018525		F47B3.1	1.3e-05	1.37331	8.81e-07	2.59065
WBGene00020658		T21F4.1	1.34e-08	1.3727	5.06e-10	2.58956
WBGene00009616		F41D3.11	0.109649	1.37212	0.033924	2.58852
WBGene00019920	acs-15	R07C3.4	0.000903279	1.3715	0.000100171	2.58739
WBGene00005550	sri-38	D2062.8	0.0993549	1.36943	0.0296554	2.58369
WBGene00010845		M03C11.8	2.43e-07	1.36709	1.18e-08	2.57949
WBGene00008117	gsr-1	C46F11.2	1.51e-06	1.36662	8.4e-08	2.57866
WBGene00004054		AC8.1	0.150574	1.36565	0.0520192	2.57693
WBGene00016670	ilys-3	C45G7.3	0.0856211	1.36506	0.0244052	2.57588
WBGene00006237	str-204	F10D2.1	0.167973	1.36489	0.0606394	2.57557
WBGene00004143	pqn-59	R119.4	2.98e-08	1.36485	1.22e-09	2.5755
WBGene00011573	anmt-3	T07C12.9	3.64e-05	1.36424	2.77e-06	2.57441
WBGene00011449		T04H1.2	3.56e-08	1.36348	1.48e-09	2.57306
WBGene00010260	ddx-17	F58E10.3	2.17e-08	1.36281	8.5e-10	2.57186
WBGene00007811		C29F7.2	0.000122551	1.36186	1.06e-05	2.57017
WBGene00016129		C26B2.7	3.74e-06	1.35701	2.28e-07	2.56154
WBGene00194869		K01A6.8	0.0138508	1.35595	0.00241296	2.55966
WBGene00012480	clec-104	Y18D10A.10	0.185862	1.35578	0.0698865	2.55936
WBGene00200503		F29G9.14	0.184018	1.35468	0.0690066	2.5574
WBGene00001876	his-2	T10C6.13	0.0692748	1.35245	0.0183835	2.55345
WBGene00010183	fipr-13	F57A8.8	0.000478185	1.35238	4.95e-05	2.55332
WBGene00020711	rmd-5	T23B3.3	0.183808	1.35215	0.0688167	2.55293
WBGene00006863	gyg-1	F56B6.4	3.85e-07	1.35198	1.93e-08	2.55262
WBGene00018097	clec-208	F36F12.6	0.0355276	1.35036	0.00781716	2.54976
WBGene00017305	nspb-12	F09F7.8	7.3e-06	1.3498	4.69e-07	2.54876
WBGene00008880		F16B12.4	2.74e-07	1.34918	1.34e-08	2.54767
WBGene00020112	pfd-5	R151.9	1.5e-07	1.34893	7e-09	2.54722
WBGene00000381	cct-6	F01F1.8	1.68e-08	1.34733	6.46e-10	2.5444
WBGene00008910		F17C8.3	0.000505707	1.34698	5.28e-05	2.54379
WBGene00235277		T04C4.3	0.190161	1.34549	0.0720332	2.54117
WBGene00018428	fbxa-183	F44E7.6	0.01502	1.34525	0.00265365	2.54075
WBGene00003072	lrp-2	T21E3.3	2.76e-06	1.34475	1.62e-07	2.53987
WBGene00206361		K02G10.15	0.00274546	1.34391	0.00035982	2.53838
WBGene00019006	spg-20	F57B10.9	8.53e-06	1.34293	5.57e-07	2.53666
WBGene00007652		C17G1.5	2.55e-05	1.34128	1.88e-06	2.53375
WBGene00017074		D2096.7	8.09e-07	1.34114	4.27e-08	2.53351
WBGene00016520		C39B5.2	0.0507051	1.34102	0.0122433	2.53331
WBGene00010586		K05C4.10	0.192541	1.33985	0.0732637	2.53124
WBGene00007764		C27B7.7	0.000302844	1.33904	2.95e-05	2.52983
WBGene00020315		T07E3.4	4.76e-05	1.33893	3.73e-06	2.52963
WBGene00015972		C18E3.3	3.81e-05	1.33832	2.92e-06	2.52856
WBGene00015306		C01G5.4	0.00481351	1.33617	0.000691054	2.5248
WBGene00219984		F58D5.12	0.0904624	1.3358	0.0261639	2.52416
WBGene00013843	fbxa-49	ZC47.12	0.131202	1.33534	0.0433462	2.52336
WBGene00017375	pbo-6	F11C7.1	0.0136613	1.33525	0.00237057	2.5232
WBGene00010174		F56H9.2	2.75e-06	1.33508	1.61e-07	2.52289
WBGene00023417	swm-1	C25E10.9	0.0446411	1.33391	0.0103512	2.52085
WBGene00001440	fkh-8	F40H3.4	0.0349622	1.33324	0.00764075	2.51968
WBGene00000820	csp-2	Y73B6BL.7	0.00934456	1.33318	0.0014996	2.51958
WBGene00021357		Y37E11AL.1	0.0650407	1.33262	0.0169159	2.51859
WBGene00014871		Y37H9A.5	0.00644129	1.33237	0.000972651	2.51816
WBGene00010182		F57A8.7	0.195471	1.33234	0.0748847	2.5181
WBGene00003827	ntl-4	C49H3.5	1.73e-08	1.33074	6.66e-10	2.51532
WBGene00008976	plp-2	F20D1.4	0.059005	1.32971	0.0149203	2.51352
WBGene00008031		C39E9.7	0.00254441	1.32862	0.00032813	2.51163
WBGene00016406		C34D10.1	0.00061131	1.32632	6.5e-05	2.50763
WBGene00019372		K03H9.3	0.00744475	1.32525	0.00115034	2.50576
WBGene00018204		F39F10.4	0.0240605	1.32341	0.00475457	2.50257
WBGene00020914	sulp-6	W01B11.2	0.000125801	1.32279	1.1e-05	2.50149
WBGene00016596		C42D4.3	0.000502432	1.32232	5.24e-05	2.50068
WBGene00044406		F02A9.7	0.079979	1.32203	0.0222639	2.50018
WBGene00044374		C17F4.12	0.175384	1.32191	0.0644477	2.49996
WBGene00206494		C15H11.16	0.0729174	1.32156	0.0196795	2.49937
WBGene00019952	fbxb-74	R08C7.9	0.197277	1.32091	0.0759785	2.49824
WBGene00015002		B0034.1	0.000124311	1.31757	1.08e-05	2.49246
WBGene00023314		H31G24.2	0.138791	1.31706	0.0465399	2.49158
WBGene00044183		F09C6.13	0.194836	1.31569	0.0745661	2.48921
WBGene00013510		Y71A12B.13	0.0375594	1.31557	0.00835113	2.48901
WBGene00008777		F13H10.6	0.00102958	1.3154	0.000116673	2.48872
WBGene00020237	phat-4	T05B4.3	1.21e-05	1.31011	8.11e-07	2.4796
WBGene00219702	linc-138	F54H5.13	0.0666033	1.30949	0.0174507	2.47855
WBGene00005188	srg-31	T07H8.5	0.044997	1.30939	0.0104535	2.47837
WBGene00014181		ZK1010.8	0.000268565	1.30919	2.58e-05	2.47802
WBGene00016894		C53B7.3	0.000520451	1.30875	5.45e-05	2.47726
WBGene00021979		Y58A7A.5	0.121846	1.30861	0.0391944	2.47702
WBGene00004778	ser-3	K02F2.6	7.47e-06	1.3085	4.82e-07	2.47684
WBGene00000064	act-2	T04C12.5	9.79e-07	1.30843	5.27e-08	2.47672
WBGene00010480		K01G5.9	1.66e-06	1.30659	9.37e-08	2.47356
WBGene00013478		Y69E1A.8	0.000493245	1.30479	5.12e-05	2.47048
WBGene00219544		C17G1.14	0.204184	1.30433	0.0796735	2.46968
WBGene00044511	clec-181	Y59H11AR.5	0.207226	1.30385	0.0811688	2.46886
WBGene00195159		T04C12.14	0.197017	1.3026	0.0757318	2.46674
WBGene00021055		W06A11.4	0.0073262	1.30074	0.00112847	2.46355
WBGene00015211		B0496.2	0.0620846	1.30059	0.0159213	2.46329
WBGene00020678		T22B11.4	1.51e-05	1.29966	1.04e-06	2.46171
WBGene00010091	ssp-35	F55C5.1	1.21e-05	1.29897	8.14e-07	2.46053
WBGene00012899		Y46G5A.7	0.154787	1.29885	0.0540545	2.46032
WBGene00009041	cut-3	F22B5.3	0.187151	1.29853	0.070656	2.45978
WBGene00004146	pqn-63	T06E4.11	1.73e-05	1.2973	1.21e-06	2.45768
WBGene00022445		Y110A2AL.9	0.0736892	1.29708	0.0199528	2.45732
WBGene00019842		R02F11.4	4.79e-07	1.29691	2.43e-08	2.45701
WBGene00022204		Y73B3A.2	0.00178789	1.295	0.000219054	2.45377
WBGene00003515	myo-3	K12F2.1	1.08e-06	1.29493	5.86e-08	2.45364
WBGene00016759		C49A9.5	0.000912375	1.29419	0.000101632	2.45239
WBGene00018702		F52E4.5	2.62e-06	1.29207	1.53e-07	2.44879
WBGene00197069		Y38F2AR.16	0.21264	1.29168	0.083973	2.44813
WBGene00004567	rrn-2.1	F31C3.11	0.0160726	1.29154	0.0028901	2.44789
WBGene00045261		H29C22.1	0.0247884	1.29073	0.0049312	2.44652
WBGene00013008	clec-146	Y48E1B.9	0.00290784	1.2907	0.000385106	2.44647
WBGene00009439	mlcd-1	F35G12.1	0.0697079	1.28954	0.0185214	2.4445
WBGene00018398	sptl-2	F43H9.2	3.75e-07	1.289	1.87e-08	2.44358
WBGene00004703	rsp-6	C33H5.12	0.00355405	1.28873	0.000486559	2.44312
WBGene00010476	rnf-113	K01G5.1	8.42e-07	1.2884	4.45e-08	2.44257
WBGene00022982		F09E10.10	0.202045	1.28532	0.0784766	2.43736
WBGene00004356	rhi-1	F46H6.1	3.84e-05	1.28269	2.95e-06	2.43293
WBGene00008029	scl-7	C39E9.5	0.215574	1.27675	0.0855188	2.42293
WBGene00018028		F35B3.1	0.11399	1.2744	0.0358763	2.41898
WBGene00194742		F37C12.21	0.0565408	1.27249	0.0140947	2.41578
WBGene00021853		Y54F10AM.11	0.0538995	1.27018	0.0132529	2.41192
WBGene00019888	btbd-10	R05F9.1	3.15e-07	1.27	1.57e-08	2.41162
WBGene00000889	cyn-13	Y116A8C.34	9.19e-07	1.26996	4.93e-08	2.41155
WBGene00001666	gpa-4	T07A9.7	0.0616182	1.26835	0.0157746	2.40886
WBGene00001398	fat-6	VZK822L.1	3.4e-07	1.2663	1.69e-08	2.40544
WBGene00004231	ptr-17	Y18D10A.7	1.51e-05	1.266	1.04e-06	2.40494
WBGene00000531	clh-4	T06F4.2	0.00222045	1.26512	0.00027988	2.40347
WBGene00077762		Y57G11C.499	0.218422	1.26447	0.0872619	2.40239
WBGene00005241	srh-16	F55C5.9	0.223288	1.26332	0.090221	2.40047
WBGene00020327	clec-21	T07H3.4	0.202341	1.2632	0.0786424	2.40028
WBGene00012398		Y6E2A.4	0.0364558	1.26245	0.00806758	2.39903
WBGene00008298		C54D10.3	1.51e-05	1.2619	1.04e-06	2.39811
WBGene00020585	clec-178	T19E7.1	0.0353725	1.26135	0.00775772	2.39721
WBGene00008628	ttr-21	F09F3.6	0.000327028	1.26089	3.25e-05	2.39643
WBGene00015925		C17H11.5	0.0410371	1.26044	0.00930976	2.39569
WBGene00017152		EGAP798.1	0.225289	1.26004	0.0912322	2.39502
WBGene00249826		F42A9.18	0.143369	1.25886	0.0486849	2.39307
WBGene00006789	unc-54	F11C3.3	3.16e-06	1.25774	1.89e-07	2.39121
WBGene00022383		Y95B8A.2	0.00011403	1.25749	9.79e-06	2.3908
WBGene00044757		Y55F3BR.11	0.0025832	1.25743	0.000334285	2.3907
WBGene00219745	linc-90	W07B3.3	0.0563882	1.25683	0.014039	2.3897
WBGene00219659	anr-36	C37C3.15	0.0354041	1.25532	0.0077705	2.38721
WBGene00017779	gtr-1	F25E2.1	0.0528233	1.25504	0.0129265	2.38673
WBGene00010821		M01G12.7	0.201698	1.25476	0.0782812	2.38628
WBGene00010880		M05D6.8	0.214855	1.25412	0.0850888	2.38522
WBGene00195737		Y82E9BR.27	0.228518	1.25408	0.0930211	2.38515
WBGene00000936	dbl-1	T25F10.2	1.67e-05	1.25364	1.17e-06	2.38442
WBGene00018145		F37C4.5	2.45e-05	1.25293	1.79e-06	2.38325
WBGene00019411		K05F1.10	4.08e-05	1.25273	3.14e-06	2.38292
WBGene00201755		C37A2.9	0.229617	1.25269	0.0935444	2.38284
WBGene00004945	sop-2	C50E10.4	0.000268565	1.25235	2.58e-05	2.38229
WBGene00022233	ipla-6	Y73B6BL.4	2.26e-07	1.25198	1.09e-08	2.38167
WBGene00009061		F22G12.1	0.0529189	1.25099	0.0129557	2.38005
WBGene00016230		C29G2.2	0.231079	1.25047	0.0943945	2.37918
WBGene00219565	linc-120	C34C6.11	0.119978	1.25044	0.0383323	2.37915
WBGene00007107	pfd-4	B0035.4	2.77e-06	1.25011	1.63e-07	2.3786
WBGene00000640	col-64	F52F12.2	0.174049	1.2454	0.0637558	2.37084
WBGene00220208		Y75B12B.16	0.232645	1.2445	0.0955341	2.36937
WBGene00020660		T21G5.2	0.0015144	1.24395	0.000181291	2.36846
WBGene00022440		Y110A2AL.3	0.184464	1.24265	0.0692443	2.36632
WBGene00012171		W01B6.4	0.105286	1.24144	0.0321219	2.36435
WBGene00219912		F22H10.10	0.0107256	1.24113	0.0017744	2.36383
WBGene00194957		Y116A8C.465	0.110605	1.24102	0.0343636	2.36365
WBGene00013569	bath-36	Y75B12B.4	0.000264076	1.24081	2.53e-05	2.36331
WBGene00019893	sgt-1	R05F9.10	5.05e-08	1.23722	2.16e-09	2.35744
WBGene00044588		ZK1236.9	0.0886864	1.23712	0.0255086	2.35728
WBGene00007419		C07E3.9	0.000121396	1.23614	1.05e-05	2.35568
WBGene00013923	ghi-1	ZK20.1	0.000143083	1.23595	1.27e-05	2.35537
WBGene00005422	srh-212	T22F3.6	0.198579	1.23582	0.076663	2.35515
WBGene00020828		T26C11.2	0.235075	1.2354	0.0968298	2.35446
WBGene00219547		T06A10.106	0.128114	1.23535	0.0420194	2.35439
WBGene00220140		Y34F4.7	0.134644	1.23512	0.0447726	2.35401
WBGene00012733		Y40B1A.2	0.157327	1.23408	0.0554179	2.35231
WBGene00019335		K02F6.1	0.000540822	1.23396	5.69e-05	2.35212
WBGene00007514	catp-8	C10C6.6	6.51e-08	1.23337	2.85e-09	2.35116
WBGene00011303		R166.3	2.07e-05	1.23316	1.48e-06	2.35081
WBGene00198709		F35G2.14	0.239568	1.23062	0.0991819	2.34667
WBGene00022824		ZK813.5	0.147084	1.22855	0.0504648	2.34332
WBGene00008922		F17C11.11	0.000203754	1.2275	1.89e-05	2.34161
WBGene00021907		Y55B1AR.3	0.0770879	1.22717	0.021197	2.34107
WBGene00016739	pitr-1	C48A7.2	0.0181109	1.227	0.00333943	2.34079
WBGene00220092		T24H10.12	0.242673	1.22694	0.10108	2.34071
WBGene00007079		AC8.7	0.0336406	1.22644	0.00727039	2.3399
WBGene00043990		AC8.12	0.0336406	1.22644	0.00727039	2.3399
WBGene00009123		F25H2.12	1.09e-05	1.22558	7.26e-07	2.3385
WBGene00021457		Y39F10C.1	0.0531666	1.22539	0.013031	2.33818
WBGene00015853		C16C8.16	0.000323349	1.22491	3.2e-05	2.3374
WBGene00020019		R12B2.3	0.0272081	1.22378	0.00555045	2.33559
WBGene00044358		Y71G12B.33	0.049719	1.22341	0.0119175	2.33499
WBGene00013026		Y49A3A.3	3.78e-05	1.22328	2.89e-06	2.33477
WBGene00001812	haf-2	F43E2.4	6.4e-05	1.22226	5.21e-06	2.33312
WBGene00022599		ZC395.10	1.29e-07	1.22147	5.93e-09	2.33184
WBGene00219964		F52G3.6	0.0067061	1.22147	0.00101892	2.33184
WBGene00007537	fipr-8	C12D8.6	0.00119365	1.22056	0.000138028	2.33038
WBGene00005474	srh-268	C54F6.1	0.213658	1.22055	0.0845238	2.33036
WBGene00001483	fog-3	C03C11.2	0.00124073	1.22006	0.000144223	2.32957
WBGene00000294	cas-1	F41G4.2	2.2e-05	1.21991	1.59e-06	2.32933
WBGene00000621	col-44	F54B11.2	0.194004	1.21825	0.0740872	2.32664
WBGene00010666		K08E4.2	0.0106079	1.21475	0.00175026	2.321
WBGene00000687	col-113	C34D4.15	0.00131533	1.21438	0.000153982	2.32041
WBGene00021072		W07B8.4	0.0432963	1.21409	0.00994393	2.31994
WBGene00018729		F53A9.6	7.39e-06	1.21232	4.76e-07	2.3171
WBGene00008248	srsx-27	C51E3.2	0.142609	1.21162	0.048314	2.31597
WBGene00009433		F35E12.9	0.000378855	1.21159	3.85e-05	2.31592
WBGene00009801	ipla-2	F47A4.5	0.000811833	1.21155	8.9e-05	2.31586
WBGene00008344		C56A3.5	6.38e-06	1.21078	4.07e-07	2.31462
WBGene00009291	clec-264	F31D4.4	0.00292446	1.2105	0.000387468	2.31419
WBGene00017120	tctn-1	E04A4.6	0.173101	1.21026	0.0632441	2.31379
WBGene00017471		F14H12.3	0.000164497	1.20794	1.49e-05	2.31008
WBGene00005902	srx-11	Y97E10B.6	0.250514	1.20715	0.105991	2.30882
WBGene00018352	fbxc-20	F42G2.3	0.0164954	1.20613	0.00298701	2.30718
WBGene00016337	fbxb-38	C33C12.5	0.096251	1.20613	0.0284528	2.30718
WBGene00004897	snb-1	T10H9.4	2.32e-05	1.20572	1.68e-06	2.30652
WBGene00004354	rgs-11	F45B8.1	0.221221	1.20563	0.0889172	2.30638
WBGene00014987		ZK637.6	0.017358	1.20545	0.00317765	2.30609
WBGene00012117		T28B11.1	2.26e-07	1.20363	1.09e-08	2.30318
WBGene00022569		ZC239.6	0.000162561	1.20248	1.47e-05	2.30134
WBGene00007366		C06B3.7	0.0342638	1.20131	0.00743905	2.29948
WBGene00002368	let-99	K08E7.3	0.00022832	1.20096	2.16e-05	2.29892
WBGene00195147		F14E5.8	0.079979	1.20046	0.0222622	2.29812
WBGene00008143		C47E8.4	0.000100616	1.19989	8.52e-06	2.29722
WBGene00044756		F58F12.4	0.00247714	1.1989	0.000317967	2.29564
WBGene00019989		R09F10.8	0.0284252	1.19851	0.00589425	2.29502
WBGene00019057		F58F9.3	5.97e-05	1.19848	4.78e-06	2.29498
WBGene00015892		C17C3.9	0.0706134	1.19844	0.018836	2.29492
WBGene00015293		C01C4.3	0.000262623	1.19778	2.51e-05	2.29386
WBGene00017262		F08F3.4	4.03e-06	1.19762	2.47e-07	2.29361
WBGene00000883	cyn-7	Y75B12B.2	1.72e-06	1.19742	9.73e-08	2.29329
WBGene00022479	fbxa-36	Y119D3A.4	0.0787182	1.19725	0.0218002	2.29303
WBGene00016509	adss-1	C37H5.6	0.000160033	1.19679	1.44e-05	2.29228
WBGene00003674	nhr-84	T06C12.7	0.00215381	1.19615	0.000270294	2.29127
WBGene00005403	srh-189	C03G6.20	0.256546	1.19585	0.10971	2.29079
WBGene00001739	grl-30	T24A6.3	0.255162	1.19583	0.108865	2.29077
WBGene00006619	try-1	ZK546.15	0.0252032	1.19546	0.0050262	2.29018
WBGene00022020	hpo-39	Y61A9LA.9	0.245751	1.1951	0.102933	2.28961
WBGene00008932		F18A11.5	0.00110497	1.19477	0.000126312	2.28909
WBGene00015858		C16D9.3	0.0719261	1.19474	0.0193327	2.28903
WBGene00016894		C53B7.3	0.220122	1.19373	0.0882816	2.28744
WBGene00019770		M04F3.4	0.000911835	1.19347	0.000101522	2.28703
WBGene00021476	nsun-4	Y39G10AR.21	0.108939	1.19281	0.0336248	2.28598
WBGene00016941		C55B6.5	0.258848	1.19222	0.111104	2.28504
WBGene00016468		C36B7.5	0.00106703	1.1915	0.000121622	2.28391
WBGene00219720	linc-2	R144.17	0.110078	1.1894	0.0341236	2.28058
WBGene00018523	lact-1	F46H5.8	0.0286133	1.1893	0.00594118	2.28042
WBGene00044350		Y73B6BL.44	0.00383543	1.18905	0.00053173	2.28002
WBGene00015012	bath-20	B0047.1	0.126299	1.18904	0.0412303	2.28001
WBGene00011959	nyn-1	T23G4.3	0.000112851	1.18834	9.67e-06	2.2789
WBGene00017344		F10E7.2	6.31e-05	1.18824	5.1e-06	2.27874
WBGene00019461		K07A3.3	0.0338551	1.18723	0.00732885	2.27715
WBGene00012671		Y39B6A.9	0.079383	1.18714	0.0220324	2.27701
WBGene00044362		F42G2.7	0.157727	1.18608	0.0556113	2.27533
WBGene00023159		W06H8.5	8.55e-07	1.18398	4.53e-08	2.27202
WBGene00009504		F37B12.1	0.000129438	1.18243	1.14e-05	2.26959
WBGene00013498		Y70G10A.2	0.186019	1.18078	0.0700543	2.26699
WBGene00015782		C14F11.7	0.264578	1.1806	0.114609	2.26671
WBGene00004208	ptc-1	ZK675.1	2.77e-06	1.18008	1.63e-07	2.26589
WBGene00001879	his-5	F45F2.3	0.0481735	1.17971	0.0114011	2.26531
WBGene00022209		Y73B3A.7	0.265332	1.17833	0.115023	2.26314
WBGene00018647		F49F1.7	0.0328804	1.17773	0.00705538	2.26221
WBGene00044541		K09H11.11	0.212615	1.17718	0.0839241	2.26135
WBGene00008863		F15D4.6	0.166876	1.1746	0.0601063	2.2573
WBGene00018668	bath-2	F52C6.11	0.0086727	1.17427	0.00136789	2.25679
WBGene00019953	wapl-1	R08C7.10	0.0582894	1.17403	0.0146655	2.25641
WBGene00044316		F41G3.21	0.0861666	1.174	0.0246504	2.25636
WBGene00004317	rbg-1	F20D1.6	0.000999897	1.17396	0.000112758	2.2563
WBGene00011405	clec-155	T04A8.3	0.00983005	1.17319	0.00159105	2.25509
WBGene00004704	rsp-7	D2089.1	2.2e-06	1.17313	1.27e-07	2.255
WBGene00004903	snf-4	Y46G5A.25	0.00276474	1.17289	0.000362536	2.25463
WBGene00015048	faah-2	B0218.2	0.00297537	1.17232	0.000395689	2.25374
WBGene00019226		H22K11.3	0.207856	1.17155	0.0815188	2.25254
WBGene00015504		C06A5.6	0.000696464	1.17125	7.5e-05	2.25206
WBGene00010946		M176.10	0.26417	1.17068	0.114359	2.25119
WBGene00020539		T16D1.1	0.250408	1.16983	0.105932	2.24984
WBGene00009633		F42E11.3	0.262436	1.16959	0.113361	2.24947
WBGene00003884	osm-3	M02B7.3	0.0135272	1.16945	0.00234296	2.24926
WBGene00017108	cyp-43A1	E03E2.1	1.58e-05	1.169	1.1e-06	2.24856
WBGene00017870		F28A10.2	0.195352	1.16895	0.0748282	2.24848
WBGene00007439		C08E8.3	0.155095	1.16892	0.0542217	2.24844
WBGene00016239		C30A5.4	0.0760434	1.16753	0.0207871	2.24627
WBGene00021022		W04B5.5	0.000165799	1.16646	1.5e-05	2.2446
WBGene00008974	tbc-1	F20D1.2	0.000123661	1.16631	1.08e-05	2.24437
WBGene00017098		E02D9.1	0.0023076	1.16617	0.000292899	2.24415
WBGene00017727		F22H10.3	2.72e-06	1.16586	1.59e-07	2.24367
WBGene00019264		H35B03.2	0.0534126	1.16558	0.0131021	2.24324
WBGene00009222	fbxa-95	F28F8.4	0.0216367	1.16499	0.00416953	2.24231
WBGene00013749		Y113G7A.12	0.141506	1.16424	0.0478104	2.24114
WBGene00044441		Y119C1B.11	0.271937	1.16393	0.11903	2.24068
WBGene00020710		T23B3.2	9.54e-05	1.1638	8.03e-06	2.24047
WBGene00000622	col-45	F53G12.7	0.227335	1.16379	0.0923265	2.24045
WBGene00018764		F53F10.2	7.11e-06	1.16299	4.57e-07	2.23922
WBGene00011548		T06G6.6	2.43e-06	1.16261	1.41e-07	2.23861
WBGene00013838	fbxa-31	ZC47.5	0.000384125	1.16246	3.91e-05	2.23839
WBGene00011153		R09A8.2	0.174764	1.16164	0.0641538	2.23712
WBGene00020092	pcf-11	R144.2	3.23e-06	1.161	1.95e-07	2.23612
WBGene00008970		F20C5.5	0.0739297	1.1604	0.0200382	2.23519
WBGene00003018	lin-32	T14F9.5	0.275474	1.15878	0.121362	2.23268
WBGene00219299		C01G12.16	0.270854	1.15735	0.118342	2.23048
WBGene00006941	wnk-1	C46C2.1	2.5e-05	1.15679	1.83e-06	2.22961
WBGene00021380		Y37E11B.9	0.108125	1.15628	0.0332737	2.22882
WBGene00014826		R13H4.2	0.00995857	1.15417	0.00161735	2.22556
WBGene00007541	fipr-4	C12D8.14	0.000314862	1.15382	3.09e-05	2.22502
WBGene00008319		C54G10.1	0.18124	1.15339	0.0674557	2.22435
WBGene00013387		Y62F5A.9	0.0377351	1.15247	0.00839435	2.22294
WBGene00004168	pqn-88	Y71G12B.21	0.124682	1.1496	0.0404432	2.21852
WBGene00010825		M01G12.14	0.0146326	1.14854	0.00256829	2.21689
WBGene00006727	ubq-1	F25B5.4	1.13e-06	1.14782	6.18e-08	2.21578
WBGene00017726		F22H10.2	0.00562272	1.14691	0.000828912	2.21439
WBGene00008545		F07A11.1	0.126152	1.14655	0.0411496	2.21384
WBGene00000534	cpi-2	R01B10.1	9.44e-06	1.14627	6.22e-07	2.21341
WBGene00020203		T04B8.1	0.267698	1.1448	0.116447	2.21116
WBGene00044289		Y37F4.8	0.0526529	1.14445	0.0128761	2.21062
WBGene00003598	nhl-2	F26F4.7	1.98e-05	1.14298	1.41e-06	2.20837
WBGene00013756	ftr-1	Y113G7B.4	0.00301478	1.1427	0.000401594	2.20793
WBGene00197454		T04H1.11	0.28386	1.14265	0.126699	2.20786
WBGene00011734	mlc-5	T12D8.6	1.6e-06	1.14258	8.99e-08	2.20775
WBGene00016229		C29G2.1	0.261136	1.14228	0.112643	2.20729
WBGene00010237	scvp-1	F58B4.4	0.28398	1.14217	0.126814	2.20713
WBGene00015817		C16A11.4	1.43e-05	1.14009	9.72e-07	2.20394
WBGene00020964	polq-1	W03A3.2	1.87e-05	1.14001	1.33e-06	2.20383
WBGene00016653		C44E4.4	1.08e-06	1.13996	5.83e-08	2.20375
WBGene00015460		C05C8.1	6.14e-05	1.13981	4.94e-06	2.20352
WBGene00011010		R04D3.2	0.225084	1.1398	0.0911024	2.20351
WBGene00000184	arf-6	Y116A8C.12	3.13e-05	1.13972	2.35e-06	2.20338
WBGene00017878		F28A10.10	0.284036	1.13962	0.12696	2.20323
WBGene00016782	phat-3	C49G7.4	0.000375978	1.13848	3.8e-05	2.20149
WBGene00021792		Y52D5A.1	0.0490698	1.138	0.0116619	2.20076
WBGene00004268	rab-5	F26H9.6	2.91e-06	1.1379	1.72e-07	2.2006
WBGene00009280		F31B9.3	0.217184	1.13615	0.0864336	2.19794
WBGene00018896		F55F8.8	0.110126	1.1359	0.0341445	2.19756
WBGene00007212		BE10.4	0.186273	1.13442	0.070177	2.19531
WBGene00006391	taf-9	T12D8.7	0.000133325	1.13428	1.17e-05	2.19509
WBGene00015626		C09B9.1	0.234564	1.13308	0.096542	2.19327
WBGene00022229		Y73B6A.2	0.0531666	1.1314	0.0130285	2.19071
WBGene00219739	linc-136	T27C4.6	0.130352	1.13079	0.0430079	2.18979
WBGene00006627	tsp-1	C02F5.8	0.0130124	1.12866	0.00224305	2.18656
WBGene00011870		T20G5.8	0.0108118	1.1284	0.00179105	2.18616
WBGene00017796		F25G6.1	0.00187205	1.12816	0.000230087	2.1858
WBGene00007374		C06C3.3	0.0949749	1.12621	0.0279661	2.18285
WBGene00219727	linc-39	T04D1.7	0.198596	1.12416	0.0766836	2.17975
WBGene00017901	igeg-1	F28E10.2	0.000144192	1.12358	1.28e-05	2.17888
WBGene00017052		D2024.4	0.000143172	1.12355	1.27e-05	2.17882
WBGene00011643	slc-17.9	T09B9.2	0.00559539	1.12347	0.000823958	2.17871
WBGene00019369		K03H6.4	0.286232	1.12337	0.128245	2.17855
WBGene00020862	fip-2	T27E4.4	0.000314862	1.12229	3.09e-05	2.17692
WBGene00012084	npr-15	T27D1.3	0.0482958	1.12214	0.0114381	2.17669
WBGene00009069		F23A7.4	0.00012261	1.12199	1.07e-05	2.17647
WBGene00022042	icd-2	Y65B4BR.5	4.06e-05	1.1218	3.12e-06	2.17619
WBGene00007179		B0457.4	0.218929	1.12046	0.0876462	2.17417
WBGene00010293	fbxa-108	F59A1.7	0.00355743	1.11906	0.000487794	2.17205
WBGene00019511		K08A2.1	0.00225216	1.11869	0.000285118	2.17149
WBGene00000059	acr-20	R06A4.10	0.0570389	1.1186	0.0142599	2.17136
WBGene00019400		K04G7.1	8.16e-05	1.11833	6.77e-06	2.17096
WBGene00018303		F41G3.10	0.00383919	1.11803	0.000532774	2.17051
WBGene00020764		T24C12.1	0.0630181	1.11789	0.0162386	2.17029
WBGene00004096	pqm-1	F40F8.7	8.09e-06	1.11607	5.26e-07	2.16755
WBGene00017052		D2024.4	0.255162	1.11602	0.108871	2.16749
WBGene00009433		F35E12.9	0.00308525	1.11579	0.000412851	2.16714
WBGene00023425	try-9	B0286.6	0.158618	1.11515	0.0560382	2.16618
WBGene00007786	rmd-2	C27H6.4	2.78e-05	1.11437	2.05e-06	2.16501
WBGene00219618	linc-60	Y41E3.462	0.293015	1.11309	0.132431	2.16308
WBGene00008658	clec-152	F10F2.6	0.0090069	1.11231	0.001434	2.16191
WBGene00009864		F49B2.4	0.236146	1.1115	0.0973882	2.1607
WBGene00018000		F33D11.1	0.146988	1.11109	0.0504127	2.16008
WBGene00012593	nspe-7	Y38E10A.15	0.0251807	1.11104	0.00502033	2.16001
WBGene00000648	col-72	W09G10.1	0.285381	1.10935	0.127739	2.15748
WBGene00014805		K08H10.5	0.0876124	1.10905	0.0251417	2.15704
WBGene00000803	csb-1	F53H4.1	0.00357901	1.10903	0.000491344	2.157
WBGene00019772		M04G7.1	0.00248086	1.10884	0.000318581	2.15673
WBGene00018350	ifo-1	F42C5.10	8.42e-06	1.10873	5.49e-07	2.15656
WBGene00018522		F46H5.7	1.38e-05	1.10792	9.35e-07	2.15534
WBGene00044078	tag-243	T04A8.4	0.00869874	1.10772	0.00137416	2.15505
WBGene00043997		Y79H2A.12	0.25708	1.10696	0.110086	2.15392
WBGene00044301	lgc-28	D2062.12	0.0947524	1.10651	0.0278693	2.15324
WBGene00019384		K04F1.1	0.301963	1.10599	0.138489	2.15246
WBGene00022348		Y82E9BR.16	0.103194	1.10564	0.0312959	2.15195
WBGene00009584	drap-1	F40F9.7	2.53e-06	1.10495	1.48e-07	2.15092
WBGene00016789	djr-1.2	C49G7.11	0.301164	1.10447	0.137807	2.1502
WBGene00077769		F33E2.10	0.301164	1.10447	0.137807	2.1502
WBGene00018595	fbxa-145	F48C1.2	0.0352652	1.10438	0.00772057	2.15006
WBGene00004351	rgs-8.1	F52D2.2	0.272411	1.10338	0.119428	2.14858
WBGene00021988	rgs-8.2	Y59E1A.2	0.272411	1.10338	0.119428	2.14858
WBGene00006375	syp-1	F26D2.2	0.000502217	1.10306	5.23e-05	2.1481
WBGene00000435	ceh-10	W03A3.1	0.139823	1.10304	0.047025	2.14807
WBGene00235163		Y108G3AL.10	0.168002	1.10283	0.060659	2.14775
WBGene00045060		F55B11.7	0.102109	1.10028	0.0308149	2.14396
WBGene00201998		K11C4.13	0.305954	1.1002	0.141495	2.14385
WBGene00017737		F23C8.8	0.00222063	1.0988	0.000280148	2.14176
WBGene00009878		F49C12.9	5.15e-05	1.09869	4.07e-06	2.14159
WBGene00016438		C35B8.3	0.000163817	1.09859	1.48e-05	2.14145
WBGene00201640		C09G12.19	0.280368	1.09853	0.124445	2.14136
WBGene00008010		C38D9.2	0.132899	1.0975	0.0440386	2.13983
WBGene00006371	syx-3	F35C8.4	0.000206344	1.097	1.92e-05	2.13909
WBGene00017538	ceh-49	F17A9.6	0.248851	1.09664	0.104828	2.13856
WBGene00009241		F28H7.8	0.00287344	1.09626	0.000379758	2.138
WBGene00013493	clec-9	Y70C5C.2	0.301243	1.09604	0.137893	2.13767
WBGene00008536		F02H6.3	0.247523	1.09604	0.103976	2.13767
WBGene00011116	pdcd-2	R07E5.10	0.000453792	1.09537	4.66e-05	2.13667
WBGene00011736		T12D8.9	6.32e-05	1.09459	5.12e-06	2.13553
WBGene00008602	oac-14	F09B9.1	0.00328294	1.09374	0.000444731	2.13426
WBGene00007762		C27B7.5	0.000436613	1.09331	4.47e-05	2.13363
WBGene00008766		F13G3.6	0.000316264	1.09173	3.12e-05	2.1313
WBGene00012564	fbxa-107	Y37H2A.4	0.00396081	1.09157	0.000552052	2.13106
WBGene00019055		F58F9.1	0.290985	1.09119	0.131257	2.1305
WBGene00044720		Y53F4B.42	0.00563331	1.0899	0.000830783	2.12859
WBGene00020008		R11F4.2	0.152078	1.08967	0.0527063	2.12826
WBGene00020757	ucr-2.3	T24C4.1	0.00010108	1.08962	8.58e-06	2.12818
WBGene00015694	ugt-27	C10H11.5	0.218096	1.08943	0.0869933	2.12791
WBGene00017584		F19B10.2	0.110605	1.08922	0.0343722	2.1276
WBGene00015741		C13F10.1	0.0461246	1.08877	0.0108019	2.12693
WBGene00018154	exos-9	F37C12.13	3.13e-05	1.0868	2.35e-06	2.12402
WBGene00003762	nlp-24	F35B12.7	1.81e-05	1.08551	1.27e-06	2.12212
WBGene00010898	nphp-1	M28.7	0.240459	1.08542	0.0997362	2.122
WBGene00018782	cct-3	F54A3.3	3.36e-05	1.08526	2.54e-06	2.12176
WBGene00004249	pvf-1	Y39A3CL.6	0.0118246	1.08499	0.0019979	2.12136
WBGene00012333	sre-43	W07G1.6	0.304533	1.08486	0.140506	2.12116
WBGene00000090	age-1	B0334.8	2.34e-05	1.0847	1.7e-06	2.12093
WBGene00004205	psr-1	F29B9.4	0.000192789	1.08459	1.78e-05	2.12077
WBGene00023318		K07D4.1	0.15025	1.08459	0.0518905	2.12077
WBGene00000705	col-131	C39E9.3	0.00034843	1.08385	3.49e-05	2.11968
WBGene00005661	srr-10	T05B11.6	0.272908	1.08363	0.119751	2.11936
WBGene00002078	xpo-1	ZK742.1	5.92e-05	1.08316	4.72e-06	2.11867
WBGene00016495		C37C3.1	4.23e-05	1.083	3.27e-06	2.11844
WBGene00016411		C34E10.10	0.000327028	1.08255	3.25e-05	2.11778
WBGene00020601		T20B12.3	3.73e-05	1.08216	2.85e-06	2.1172
WBGene00002114	ins-31	T10D4.4	0.293922	1.08104	0.133101	2.11557
WBGene00009300		F31F6.1	0.316708	1.08078	0.148618	2.11518
WBGene00014260		ZK1321.1	0.316708	1.08067	0.148648	2.11501
WBGene00012498		Y24F12A.3	0.0573358	1.08021	0.0143561	2.11435
WBGene00008130	fbxa-140	C47B2.1	0.0124801	1.07951	0.00213368	2.11332
WBGene00003020	lin-35	C32F10.2	0.000172801	1.07895	1.58e-05	2.11249
WBGene00010281		F58G11.3	0.00289747	1.07695	0.000383383	2.10957
WBGene00007196		B0513.4	0.0222183	1.07663	0.00432443	2.1091
WBGene00011190	swt-6	R10D12.9	0.000276779	1.07634	2.67e-05	2.10868
WBGene00021945	lem-4	Y55F3BR.8	0.000171961	1.07596	1.57e-05	2.10812
WBGene00011298		R107.2	0.000377311	1.07449	3.83e-05	2.10598
WBGene00001806	gur-5	ZK622.2	0.108125	1.07239	0.033269	2.10291
WBGene00013480	egas-3	Y69H2.2	0.286968	1.07237	0.128702	2.10288
WBGene00015776	dct-1	C14F5.1	0.00931251	1.07173	0.00149292	2.10196
WBGene00014088		ZK809.8	0.0471535	1.07093	0.0110974	2.10079
WBGene00000377	cct-1	T05C12.7	0.000184073	1.07061	1.69e-05	2.10033
WBGene00020887		T28B4.4	0.00634095	1.06978	0.000954006	2.09912
WBGene00013596	nyn-2	Y87G2A.7	0.000478185	1.06977	4.95e-05	2.0991
WBGene00198856		T25C12.7	0.304826	1.06897	0.140709	2.09793
WBGene00198620		F11C7.9	0.30785	1.06866	0.142738	2.09749
WBGene00012900		Y46G5A.8	0.309995	1.06862	0.143999	2.09742
WBGene00003092	lys-3	Y22F5A.6	0.0374298	1.06835	0.00832025	2.09703
WBGene00021097	cdc-37	W08F4.8	3.64e-05	1.06818	2.77e-06	2.09679
WBGene00196872		F40F9.15	0.322096	1.06802	0.152566	2.09656
WBGene00017391		F12A10.2	0.318387	1.06754	0.149862	2.09585
WBGene00016702		C46A5.6	0.00012012	1.06688	1.04e-05	2.0949
WBGene00018747		F53C3.3	0.271849	1.06679	0.118911	2.09477
WBGene00008051	lron-4	C41C4.3	0.0499101	1.06673	0.0119784	2.09468
WBGene00013119		Y51H4A.25	0.00320156	1.06634	0.00043159	2.09411
WBGene00002064	iff-1	T05G5.10	5.82e-06	1.06571	3.69e-07	2.0932
WBGene00019234	ugt-8	H23N18.3	0.00659457	1.06564	0.000998341	2.0931
WBGene00013763		Y113G7B.14	6.3e-05	1.06557	5.09e-06	2.09299
WBGene00021171		Y8A9A.2	0.012029	1.06534	0.00204217	2.09266
WBGene00010193	btb-20	F57C2.1	0.00292939	1.06474	0.000388605	2.09179
WBGene00011185		R10D12.1	0.0110506	1.06357	0.00184034	2.09009
WBGene00001772	gst-24	F37B1.1	0.0122193	1.06214	0.00208076	2.08803
WBGene00007236		C01G10.9	0.000353933	1.0617	3.55e-05	2.08739
WBGene00016527	fbxa-47	C39B5.9	0.320481	1.06154	0.15143	2.08716
WBGene00011394		T03D8.7	0.290559	1.06105	0.131031	2.08645
WBGene00044964		F22D6.16	0.322357	1.06102	0.152832	2.0864
WBGene00021048		W05H9.1	0.00550242	1.05975	0.000806933	2.08457
WBGene00013181		Y53H1B.2	0.00557797	1.05957	0.000821086	2.08431
WBGene00016976		C56E10.3	0.0618898	1.05869	0.015868	2.08304
WBGene00175029		AH9.7	0.271604	1.0585	0.118759	2.08276
WBGene00017459		F14D2.11	0.126041	1.05843	0.0410925	2.08267
WBGene00199997		H32C10.97	1	1.05757	0.147983	2.08143
WBGene00005686	sru-23	F36G9.6	0.319207	1.05752	0.150417	2.08135
WBGene00010682		K08F8.5	0.0172714	1.05692	0.00315607	2.08049
WBGene00020534	fbxc-49	T16A1.3	0.0747623	1.0567	0.0203339	2.08017
WBGene00010245		F58D5.6	0.035417	1.05603	0.00777723	2.07921
WBGene00016302	fbxc-7	C32B5.9	0.181656	1.0544	0.0677122	2.07685
WBGene00014956		Y102A5C.11	0.308938	1.05423	0.143372	2.07661
WBGene00013808	sfa-1	Y116A8C.32	8.53e-05	1.05418	7.13e-06	2.07654
WBGene00003041	lin-61	R06C7.7	4.82e-05	1.05342	3.78e-06	2.07544
WBGene00021898		Y54G2A.36	0.00200773	1.05225	0.000248422	2.07376
WBGene00012551	cec-7	Y37D8A.11	0.000219364	1.05225	2.06e-05	2.07376
WBGene00008661		F10G8.1	0.00318578	1.05214	0.000428936	2.07361
WBGene00044924		M106.7	0.0038562	1.05142	0.000535772	2.07257
WBGene00000698	col-124	C24F3.6	4.55e-05	1.05074	3.54e-06	2.07159
WBGene00007878		C33A11.2	0.0169655	1.05038	0.0030871	2.07108
WBGene00010692		K08H2.5	0.205723	1.05038	0.0804046	2.07107
WBGene00015357		C02F12.8	0.00165509	1.05037	0.000200686	2.07107
WBGene00015616		C08G5.3	0.0485369	1.0498	0.0115139	2.07025
WBGene00200884		F25D1.10	0.315711	1.04924	0.147894	2.06944
WBGene00018178		F38E1.3	0.0214677	1.04924	0.00412986	2.06944
WBGene00013080		Y51A2D.13	1.94e-05	1.04907	1.38e-06	2.06919
WBGene00001424	fis-1	F41G3.4	0.0741566	1.04892	0.0201315	2.06898
WBGene00077453		Y62F5A.12	0.0116176	1.04842	0.00195398	2.06826
WBGene00007007	mak-2	C44C8.6	0.00265001	1.04694	0.000345121	2.06615
WBGene00044963		K07C5.11	0.31908	1.04689	0.150276	2.06606
WBGene00021369	siah-1	Y37E11AR.2	0.028228	1.04632	0.00582692	2.06525
WBGene00022572		ZC239.14	0.00195937	1.04585	0.000242007	2.06458
WBGene00008465		E03A3.5	0.335949	1.04544	0.16233	2.064
WBGene00017674		F21F3.4	0.0106526	1.04504	0.0017588	2.06342
WBGene00017146		EGAP1.1	0.162964	1.04498	0.0581039	2.06334
WBGene00001942	his-68	T23D8.6	0.0770981	1.04443	0.0212071	2.06255
WBGene00003514	myo-2	T18D3.4	0.000978607	1.04301	0.000109926	2.06052
WBGene00022890	fbxa-224	ZK1290.9	0.136597	1.04259	0.0455726	2.05992
WBGene00006531	tba-5	F16D3.1	0.109282	1.04254	0.0337804	2.05986
WBGene00201467		F36H12.65	0.0279937	1.0423	0.00576931	2.05951
WBGene00012543	nkcc-1	Y37A1C.1	2.74e-05	1.04145	2.02e-06	2.0583
WBGene00022535		ZC178.1	0.3371	1.04136	0.163313	2.05817
WBGene00001105	dsl-3	Y41D4B.10	1	1.04136	0.154146	2.05817
WBGene00013388		Y62F5A.10	0.00272851	1.04112	0.000357148	2.05782
WBGene00012302	dot-1.3	W06D11.4	0.159535	1.04083	0.056433	2.05742
WBGene00021349	arl-13	Y37E3.5	0.0999044	1.04048	0.029891	2.05691
WBGene00019134		F59H6.3	0.0504984	1.03991	0.0121767	2.0561
WBGene00007047	wts-1	T20F10.1	0.00226197	1.03936	0.000286715	2.05531
WBGene00009606		F40G12.11	0.211364	1.03908	0.0833136	2.05492
WBGene00001884	his-10	ZK131.4	0.041714	1.03894	0.00951158	2.05472
WBGene00001888	his-14	ZK131.8	0.041714	1.03894	0.00951158	2.05472
WBGene00001900	his-26	ZK131.1	0.041714	1.03894	0.00951158	2.05472
WBGene00077546		C01A2.9	0.338315	1.03829	0.164386	2.05379
WBGene00018585		F48A11.4	0.00222063	1.03769	0.000280131	2.05293
WBGene00021068		W06H8.6	0.000151241	1.03761	1.35e-05	2.05283
WBGene00009720		F45B8.3	0.0089737	1.03677	0.00142723	2.05163
WBGene00013619	fbxa-112	Y102A5C.13	0.305112	1.0366	0.141025	2.05139
WBGene00009043		F22B5.5	0.0160469	1.03622	0.00288459	2.05084
WBGene00011513	fbxa-197	T06C12.4	0.0124136	1.03569	0.00211794	2.0501
WBGene00021899		Y54H5A.1	0.000178332	1.03559	1.63e-05	2.04996
WBGene00000115	alh-9	F01F1.6	0.000296746	1.03499	2.89e-05	2.04909
WBGene00015852		C16C8.14	0.0183181	1.03493	0.0033826	2.04902
WBGene00000706	col-132	C39E9.9	0.333064	1.03461	0.160325	2.04856
WBGene00021015	enu-3.3	W03G9.3	0.000952184	1.03414	0.000106538	2.04789
WBGene00001080	dpy-21	Y59A8B.1	0.00130099	1.03393	0.000152016	2.0476
WBGene00017823		F26D11.6	0.0594641	1.03388	0.015056	2.04752
WBGene00235270		F59E12.16	0.21847	1.03375	0.0873901	2.04734
WBGene00012931		Y47D3A.20	0.0603717	1.03372	0.0153656	2.04729
WBGene00008317		C54G4.7	0.00070492	1.03296	7.6e-05	2.04622
WBGene00001911	his-37	C50F4.7	0.0012461	1.03283	0.000144985	2.04603
WBGene00011563	jmjd-4	T07C4.11	0.0199342	1.0322	0.00376896	2.04514
WBGene00015964	glb-5	C18C4.1	0.232645	1.03215	0.0955237	2.04506
WBGene00008980	emre-1	F20D1.10	0.00308522	1.03211	0.000412677	2.04501
WBGene00018664	bath-11	F52C6.7	0.0723604	1.03191	0.0194614	2.04473
WBGene00008911		F17C8.6	0.340512	1.03181	0.166185	2.04458
WBGene00021465	ekl-7	Y39G10AR.7	0.00150618	1.03106	0.00017967	2.04352
WBGene00008575	scl-24	F08E10.7	0.32637	1.03071	0.155525	2.04303
WBGene00017258		F08F1.4	0.156662	1.03047	0.0550889	2.04269
WBGene00018781		F54A3.2	0.000207355	1.03042	1.93e-05	2.04262
WBGene00017353		F10E9.1	0.155497	1.0298	0.0543965	2.04174
WBGene00007290		C04B4.2	0.104904	1.02852	0.031982	2.03993
WBGene00013841	fbxa-33	ZC47.9	0.0800409	1.02807	0.0222994	2.0393
WBGene00020995		W03F8.6	0.00844173	1.02718	0.00132608	2.03803
WBGene00016331	obr-4	C32F10.1	2.71e-05	1.02698	2e-06	2.03775
WBGene00008657	clec-154	F10F2.5	0.0397503	1.02692	0.00893682	2.03767
WBGene00017140		EEED8.12	0.194121	1.02636	0.0741963	2.03687
WBGene00011435		T04D3.8	0.07125	1.02553	0.019096	2.0357
WBGene00005619	srj-34	T07C12.5	0.184464	1.02514	0.069223	2.03516
WBGene00007517	gpx-3	C11E4.2	0.00335234	1.02482	0.00045524	2.0347
WBGene00020455	fbxa-59	T12B5.8	0.00026756	1.02422	2.57e-05	2.03386
WBGene00010844	prp-3	M03C11.7	4.72e-05	1.02317	3.69e-06	2.03238
WBGene00206357		C09D4.9	0.0602757	1.02269	0.0153113	2.0317
WBGene00000777	cpn-1	F43G9.9	2.44e-05	1.02247	1.78e-06	2.03139
WBGene00044257		Y45F10D.16	0.287095	1.02179	0.128827	2.03043
WBGene00007660		C17H1.7	0.0252779	1.02023	0.00504248	2.02824
WBGene00002270	lec-7	R07B1.2	0.078201	1.01894	0.0216095	2.02643
WBGene00050947		K07C5.13	0.347842	1.01893	0.171669	2.02641
WBGene00014024		ZK637.4	0.166501	1.01826	0.0598789	2.02547
WBGene00016733	phat-2	C46H11.9	0.00785737	1.01806	0.00122371	2.0252
WBGene00009055		F22D6.14	0.0611482	1.01719	0.0156172	2.02397
WBGene00017352		F10E7.11	0.0148472	1.01692	0.00261494	2.02359
WBGene00022507		ZC21.8	0.103486	1.01679	0.0314074	2.02341
WBGene00044942		F54E7.11	0.342086	1.01678	0.167557	2.0234
WBGene00013264		Y57A10A.24	0.103932	1.01658	0.0315885	2.02312
WBGene00000603	col-14	C46A5.3	4.1e-05	1.01638	3.16e-06	2.02283
WBGene00000117	alh-11	F42G9.5	0.000239686	1.01621	2.28e-05	2.02259
WBGene00016504		C37C3.12	0.0353778	1.01568	0.00776276	2.02186
WBGene00016515		C38C3.7	0.0212845	1.01567	0.00408523	2.02185
WBGene00019975	flp-34	R09A1.5	0.00414176	1.01563	0.000581151	2.02178
WBGene00012500	hpo-2	Y26D4A.2	0.319793	1.01548	0.150859	2.02157
WBGene00022378		Y94H6A.5	0.000125801	1.01539	1.1e-05	2.02144
WBGene00005651	srp-10	F09C6.4	0.0856551	1.0152	0.0244196	2.02119
WBGene00019303		K02D10.3	0.276922	1.01518	0.12229	2.02115
WBGene00015244		B0524.5	0.134496	1.01513	0.0447085	2.02109
WBGene00010564	ath-1	K04G2.5	0.0838804	1.01451	0.0237196	2.02022
WBGene00008779		F14B4.1	0.0615375	1.01402	0.0157505	2.01953
WBGene00021810	phf-15	Y53G8AR.2	0.000404246	1.01385	4.12e-05	2.01929
WBGene00013735		Y111B2A.12	0.000301236	1.01378	2.94e-05	2.0192
WBGene00000228	atn-1	W04D2.1	5.86e-05	1.01375	4.68e-06	2.01915
WBGene00015805		C15H9.11	0.0274862	1.01347	0.00562989	2.01876
WBGene00018208		F39G3.3	0.00142677	1.01298	0.000168993	2.01808
WBGene00007553		C13G3.1	0.0169748	1.01274	0.00308973	2.01773
WBGene00017451		F14D2.2	0.232464	1.01204	0.0954216	2.01676
WBGene00013157		Y53F4B.10	0.334214	1.01154	0.161105	2.01606
WBGene00004114	pqn-25	D1044.3	0.0210592	1.01124	0.00402807	2.01565
WBGene00017629		F20B6.5	0.341531	1.01122	0.167078	2.01561
WBGene00011669		T09F5.10	0.0320004	1.0104	0.00682837	2.01447
WBGene00018748		F53C3.4	0.134065	1.00932	0.0445356	2.01297
WBGene00021000		W03F9.2	0.0074265	1.00912	0.00114556	2.01268
WBGene00219854		C41C4.18	0.355852	1.00902	0.177035	2.01255
WBGene00018767		F53G2.2	0.355671	1.00815	0.176875	2.01132
WBGene00019315		K02E7.11	0.355671	1.00815	0.176875	2.01132
WBGene00014977		ZC15.4	0.295846	1.00809	0.134297	2.01124
WBGene00009078	rpb-12	F23B2.13	0.336984	1.00794	0.163189	2.01103
WBGene00001259	emb-5	T04A8.14	5.22e-05	1.00698	4.13e-06	2.0097
WBGene00007125		B0250.8	0.35777	1.00678	0.178471	2.00943
WBGene00000423	ced-9	T07C4.8	0.00031929	1.00638	3.15e-05	2.00887
WBGene00007393	fbxa-157	C06H5.2	0.0629798	1.006	0.0162219	2.00833
WBGene00010295	fbxa-193	F59A1.9	0.0106628	1.00599	0.00176108	2.00832
WBGene00021848	nhr-239	Y54F10AM.1	0.356021	1.0056	0.177148	2.00778
WBGene00015466	hyls-1	C05C8.9	0.00152464	1.00535	0.000182937	2.00743
WBGene00018391	rpb-4	F43E2.2	0.000174586	1.00479	1.59e-05	2.00665
WBGene00015816		C16A11.3	0.0842835	1.00451	0.0238614	2.00626
WBGene00011021		R05A10.4	0.218068	1.00393	0.0869561	2.00546
WBGene00008007		C38D4.7	0.0166521	1.0039	0.00302366	2.00542
WBGene00018047	clec-136	F35D11.7	0.358054	1.00356	0.178736	2.00494
WBGene00020048	lgc-12	R13A5.4	0.267135	1.00334	0.116118	2.00463
WBGene00010242		F58D5.2	0.111054	1.00287	0.0345422	2.00398
WBGene00001713	grl-4	F42C5.7	0.0218113	1.00283	0.00421399	2.00393
WBGene00017060		D2063.1	0.0320004	1.00271	0.00682953	2.00377
WBGene00018223	bath-13	F40B1.1	0.123975	1.00228	0.0400936	2.00316
WBGene00022567		ZC239.4	0.263746	1.00175	0.114089	2.00243
WBGene00011304	mnk-1	R166.5	0.00285711	1.0017	0.000377129	2.00236
WBGene00003771	nlp-33	T19C4.7	0.000713659	1.00147	7.69e-05	2.00204
WBGene00006937	wah-1	Y56A3A.32	0.00109653	1.00079	0.000125287	2.00109
WBGene00007740		C26C6.6	0.181656	1.00038	0.067721	2.00053
WBGene00006700	uba-2	W02A11.4	0.00113359	1.00014	0.000129833	2.00019
WBGene00021934	cct-8	Y55F3AR.3	0.000740765	0.999108	8.02e-05	1.99876
WBGene00008940		F18H3.4	0.00073905	0.998784	7.99e-05	1.99831
WBGene00045212		Y110A7A.21	0.00634096	0.998591	0.000954358	1.99805
WBGene00021010		W03G1.2	0.0180861	0.998221	0.00333285	1.99754
WBGene00017725		F22H10.1	0.354251	0.998129	0.175915	1.99741
WBGene00017875		F28A10.7	0.273004	0.997422	0.119913	1.99643
WBGene00011469	dylt-3	T05C12.5	0.218155	0.997387	0.0870361	1.99638
WBGene00016794		C49H3.9	0.000321659	0.996155	3.18e-05	1.99468
WBGene00043279		F22D6.8	0.0201165	0.995482	0.00381894	1.99375
WBGene00235330		F21C10.18	0.210948	0.994927	0.0830801	1.99298
WBGene00015076		B0238.12	0.0477096	0.994869	0.0112729	1.9929
WBGene00003472	mtk-1	B0414.7	4.4e-05	0.994579	3.41e-06	1.9925
WBGene00005004	spp-19	K04A8.9	0.260906	0.994182	0.1125	1.99195
WBGene00021345		Y37B11A.3	0.0200723	0.994074	0.00380392	1.9918
WBGene00235254		F49D11.14	0.247654	0.993858	0.104099	1.9915
WBGene00005344	srh-127	F37B4.1	0.358573	0.993503	0.17914	1.99101
WBGene00236798		F48C1.15	0.357882	0.993399	0.178618	1.99087
WBGene00020656		T21E12.5	0.138081	0.993326	0.0461817	1.99077
WBGene00018803	fbxa-24	F54D10.2	0.00750486	0.993068	0.00116095	1.99041
WBGene00010857		M04C9.2	0.36573	0.992806	0.184235	1.99005
WBGene00007365		C06B3.6	0.0124775	0.992511	0.00213229	1.98965
WBGene00012755		Y41C4A.8	0.000689919	0.992032	7.42e-05	1.98899
WBGene00004933	sod-4	F55H2.1	0.000367584	0.991941	3.71e-05	1.98886
WBGene00013727		Y111B2A.1	0.0242849	0.991863	0.00480962	1.98875
WBGene00019748	atg-2	M03A8.2	0.00853995	0.991769	0.00134366	1.98862
WBGene00019780		M60.4	0.0160469	0.99156	0.00288392	1.98833
WBGene00001940	his-66	H02I12.6	0.101145	0.99151	0.0304182	1.98826
WBGene00011808		T16G12.7	0.0137465	0.991502	0.00239004	1.98825
WBGene00044891		T07C4.12	0.00825067	0.991232	0.00129405	1.98788
WBGene00012466	ippk-1	Y17G7B.13	0.00303074	0.991028	0.000403887	1.9876
WBGene00077503		AC3.12	0.192556	0.99089	0.07328	1.98741
WBGene00015605		C08E3.13	0.256098	0.990636	0.109398	1.98706
WBGene00023291		F53H1.2	0.311651	0.99033	0.145043	1.98664
WBGene00009630		F42E8.1	0.359026	0.989659	0.179493	1.98572
WBGene00016823		C50E3.12	0.332392	0.989083	0.159842	1.98492
WBGene00014039		ZK662.2	0.000204098	0.988723	1.9e-05	1.98443
WBGene00015232		B0511.6	0.00066175	0.988402	7.09e-05	1.98399
WBGene00008028	scl-6	C39E9.4	0.145438	0.988027	0.04974	1.98347
WBGene00003593	nfm-1	F42A10.2	0.00151413	0.987957	0.000181175	1.98338
WBGene00018990	klf-1	F56F11.3	0.00236499	0.987675	0.000301357	1.98299
WBGene00044235		C06A1.7	0.0718541	0.987617	0.0193094	1.98291
WBGene00235369		K08D10.18	0.082895	0.987568	0.0233407	1.98284
WBGene00010420	mcrs-1	H28O16.2	0.000761614	0.987237	8.28e-05	1.98239
WBGene00004185	pro-1	R166.4	0.000669441	0.987049	7.18e-05	1.98213
WBGene00014996		ZK1251.5	0.0175286	0.986969	0.00321274	1.98202
WBGene00014031		ZK637.14	0.00360837	0.986022	0.000495972	1.98072
WBGene00007551		C13C4.7	0.0643863	0.985638	0.0166747	1.98019
WBGene00021463	zeel-1	Y39G10AR.5	0.370744	0.98495	0.188068	1.97925
WBGene00014002		ZK593.2	0.0258356	0.984892	0.00520071	1.97917
WBGene00022307		Y77E11A.2	0.000449197	0.984857	4.61e-05	1.97912
WBGene00011174	acs-23	R09E10.4	0.110038	0.98453	0.0341049	1.97867
WBGene00009402		F35C11.3	0.0138873	0.983956	0.00242217	1.97788
WBGene00185089		C16A11.10	0.0450496	0.983409	0.0104782	1.97713
WBGene00013983		ZK512.2	0.000100947	0.983398	8.56e-06	1.97712
WBGene00006446	atx-3	F28F8.6	0.000304683	0.982841	2.98e-05	1.97635
WBGene00077525		C41G7.8	0.00912205	0.982795	0.00145685	1.97629
WBGene00008861		F15D4.4	0.100387	0.982451	0.0300891	1.97582
WBGene00022700		ZK353.4	0.0567621	0.982445	0.0141787	1.97581
WBGene00020579		T19D12.4	9.61e-05	0.982016	8.09e-06	1.97522
WBGene00014180		ZK1010.6	0.32706	0.98157	0.156053	1.97461
WBGene00044438		Y51F10.11	0.0154312	0.981448	0.0027467	1.97445
WBGene00017933		F29G9.7	0.358729	0.980938	0.179266	1.97375
WBGene00010563		K04G2.4	0.0135272	0.97992	0.00234241	1.97236
WBGene00001103	dsl-1	W09G12.4	0.374375	0.979035	0.190508	1.97115
WBGene00020260		T05E7.4	0.0445523	0.97796	0.0103232	1.96968
WBGene00009176	nmat-2	F26H9.4	0.00691434	0.977836	0.00105589	1.96951
WBGene00022818		ZK783.3	0.111884	0.976944	0.0349266	1.96829
WBGene00201625		F45D3.15	0.34104	0.97686	0.166677	1.96818
WBGene00018574		F47F6.4	0.327872	0.976859	0.156602	1.96818
WBGene00003596	ngp-1	T19A6.2	0.000194586	0.976795	1.79e-05	1.96809
WBGene00077450		K06B4.15	0.104207	0.97651	0.0316948	1.9677
WBGene00004041	plg-1	F44E2.11	0.368769	0.976376	0.186599	1.96752
WBGene00019612	gpcp-1	K10B3.6	0.00239943	0.975891	0.000306406	1.96686
WBGene00004017	phg-1	F27E5.4	0.000207038	0.975644	1.93e-05	1.96652
WBGene00005289	srh-68	T21B4.5	0.376341	0.975591	0.19213	1.96645
WBGene00194660		W09C5.12	0.32145	0.974845	0.15198	1.96543
WBGene00000583	cof-2	C48E7.5	0.163915	0.97472	0.0586384	1.96526
WBGene00016764		C49A9.10	0.0166411	0.97451	0.00302074	1.96497
WBGene00015356	tag-278	C02F12.7	0.0110836	0.97451	0.00184889	1.96497
WBGene00013809		Y116A8C.33	0.0089308	0.973519	0.00141745	1.96362
WBGene00019381		K04C2.3	0.255322	0.97311	0.108954	1.96307
WBGene00013078	ttr-25	Y51A2D.10	0.00428801	0.97213	0.00060309	1.96173
WBGene00016982		C56G2.9	0.194058	0.97174	0.0741571	1.9612
WBGene00001757	gst-9	R05F9.5	0.0286133	0.97159	0.00594317	1.961
WBGene00018999		F57B9.8	0.0147267	0.97142	0.00258643	1.96077
WBGene00044896		K12C11.5	0.10008	0.971285	0.02996	1.96059
WBGene00010036	cpar-1	F54C8.2	0.0372825	0.971098	0.00828341	1.96033
WBGene00018953		F56C9.10	0.000325128	0.970958	3.22e-05	1.96014
WBGene00007124		B0250.7	0.0280855	0.970443	0.00579286	1.95944
WBGene00011979		T24B8.5	0.22307	0.970134	0.0900538	1.95902
WBGene00020012		R11G1.6	0.00245883	0.969428	0.000314804	1.95806
WBGene00021020		W04B5.3	0.000156532	0.969426	1.41e-05	1.95806
WBGene00021768		Y51F10.7	0.000384996	0.968883	3.92e-05	1.95732
WBGene00018122	ttbk-2	F36H12.8	0.00897127	0.968643	0.00142585	1.957
WBGene00021821		Y54B9A.1	0.0838357	0.968592	0.023685	1.95693
WBGene00011788		T15H9.2	0.00914692	0.968576	0.00146234	1.95691
WBGene00015843		C16C8.5	0.0649842	0.968444	0.0168905	1.95673
WBGene00008862		F15D4.5	0.160822	0.968162	0.0570211	1.95635
WBGene00001496	frm-10	F25H9.5	0.00216479	0.967997	0.000271911	1.95612
WBGene00194699		Y43F8B.22	0.35036	0.967739	0.173327	1.95577
WBGene00020391	cct-7	T10B5.5	0.00141109	0.967493	0.000166903	1.95544
WBGene00012795		Y43E12A.3	0.0763995	0.966987	0.0209205	1.95475
WBGene00007617	rrbs-1	C15H11.9	8.6e-05	0.966934	7.2e-06	1.95468
WBGene00008853	clec-101	F15D3.2	0.377995	0.966376	0.193391	1.95393
WBGene00043705	egrh-2	Y55F3AM.7	0.059448	0.965992	0.0150487	1.95341
WBGene00018589		F48B9.3	0.0846425	0.965848	0.0240144	1.95321
WBGene00219665	linc-101	C54E4.11	0.379605	0.964894	0.194709	1.95192
WBGene00006959	xbp-1	R74.3	0.00128327	0.964694	0.000149875	1.95165
WBGene00003437	msp-42	F26G1.8	0.0940558	0.964686	0.0275601	1.95164
WBGene00014746		F27D4.3	0.0156571	0.963989	0.00279986	1.9507
WBGene00012385		Y5F2A.4	0.00171763	0.962503	0.000209595	1.94869
WBGene00015399	cyp-35A1	C03G6.14	0.382685	0.96248	0.197309	1.94866
WBGene00012405	ztf-25	Y6G8.3	0.374375	0.962189	0.190498	1.94826
WBGene00015816		C16A11.3	0.0117366	0.961552	0.00197851	1.9474
WBGene00007712	mrpl-34	C25A1.13	0.00157828	0.961465	0.000190155	1.94729
WBGene00019163	ubxn-6	H06H21.6	0.000160491	0.961405	1.45e-05	1.94721
WBGene00001683	gpd-1	T09F3.3	0.00114743	0.96138	0.000131621	1.94717
WBGene00009549		F38H4.5	0.090257	0.961298	0.0260797	1.94706
WBGene00009890	scl-9	F49E11.4	0.384888	0.960877	0.198996	1.94649
WBGene00017183	scl-15	F02E11.5	0.384092	0.960066	0.198415	1.9454
WBGene00044171		Y54E2A.13	0.385415	0.959963	0.199395	1.94526
WBGene00184990		C14B1.12	0.0209044	0.959837	0.00399385	1.94509
WBGene00000460	ceh-39	T26C11.7	0.16539	0.959734	0.0593423	1.94495
WBGene00007234		C01G10.7	0.00069899	0.95919	7.53e-05	1.94422
WBGene00000388	cdc-25.3	ZK637.11	0.284505	0.959052	0.127222	1.94403
WBGene00002717	let-526	C01G8.9	0.0686794	0.957448	0.0181456	1.94187
WBGene00013868		ZC373.3	0.30404	0.956657	0.139977	1.94081
WBGene00000480	cgp-1	Y38C9A.2	0.000239686	0.955167	2.28e-05	1.9388
WBGene00220259		ZK418.13	0.0443457	0.95453	0.0102603	1.93795
WBGene00001626	gly-1	F44F4.6	0.31908	0.953762	0.150272	1.93692
WBGene00002274	lec-11	F38A5.3	0.00151914	0.953744	0.00018211	1.93689
WBGene00003040	lin-59	T12F5.4	0.000221492	0.953712	2.09e-05	1.93685
WBGene00044785		F47E1.5	0.343591	0.953587	0.168616	1.93668
WBGene00018745		F53C3.1	0.024004	0.953501	0.00473972	1.93657
WBGene00015033		B0207.10	0.387812	0.953479	0.201357	1.93654
WBGene00012241		W04A8.6	0.00121337	0.953153	0.000140508	1.9361
WBGene00200497		F22E12.11	1	0.952934	0.188436	1.93581
WBGene00019405		K05F1.1	0.0108792	0.952741	0.00180581	1.93555
WBGene00206525		R74.10	0.141303	0.952482	0.047703	1.9352
WBGene00018048	clec-137	F35D11.8	0.390405	0.951306	0.203569	1.93362
WBGene00023418		R06F6.12	0.00177895	0.950842	0.000217762	1.933
WBGene00016954		C55C3.4	0.0838699	0.950705	0.0237074	1.93282
WBGene00002023	hsp-25	C09B8.6	0.00167184	0.950652	0.000203269	1.93275
WBGene00017288		F09E5.10	0.000716733	0.950586	7.73e-05	1.93266
WBGene00014714		C54C8.8	0.389397	0.950477	0.2027	1.93251
WBGene00021041		W05G11.4	0.384838	0.949316	0.198946	1.93096
WBGene00045092		H06I04.9	0.366193	0.949277	0.184629	1.9309
WBGene00020036		R12E2.11	0.00150618	0.948758	0.000179726	1.93021
WBGene00004808	skr-2	F46A9.4	0.000567628	0.948402	6e-05	1.92973
WBGene00001885	his-11	ZK131.5	0.0211373	0.948399	0.00405	1.92973
WBGene00006509	tag-164	Y76A2A.1	0.0184227	0.9482	0.00340706	1.92946
WBGene00019640	dos-2	K10G6.2	0.0089737	0.947994	0.0014272	1.92919
WBGene00014163	rnh-1.2	ZK938.7	0.0416646	0.947276	0.00948883	1.92823
WBGene00012785		Y43C5B.2	0.0360276	0.947013	0.00795189	1.92788
WBGene00195084		C43C3.4	0.287722	0.946917	0.129231	1.92775
WBGene00004826	skr-20	R12H7.5	0.00754022	0.946262	0.00116767	1.92687
WBGene00000216	asp-3	H22K11.1	0.00020375	0.946178	1.89e-05	1.92676
WBGene00012481		Y18D10A.11	0.023948	0.946017	0.00472436	1.92655
WBGene00022143		Y71G12B.3	0.0361194	0.945719	0.00797922	1.92615
WBGene00019459		K06H7.8	0.0122009	0.945285	0.00207617	1.92557
WBGene00219483		Y116F11B.24	0.385853	0.945156	0.199812	1.9254
WBGene00018364	dagl-2	F42G9.6	0.000166159	0.944848	1.51e-05	1.92499
WBGene00000625	col-48	Y54E10BL.2	0.00026756	0.944707	2.57e-05	1.9248
WBGene00044767		T23B7.3	0.180455	0.943608	0.067064	1.92333
WBGene00004145	pqn-62	T03G11.1	0.0111938	0.942961	0.0018716	1.92247
WBGene00011171		R09E10.1	0.0155684	0.942949	0.00277713	1.92245
WBGene00010484	dph-3	K01H12.1	0.0240842	0.942095	0.00476059	1.92132
WBGene00018259		F41B4.3	0.0140487	0.942021	0.00245419	1.92122
WBGene00006798	unc-64	F56A8.7	0.00543277	0.941717	0.000795221	1.92081
WBGene00014089		ZK822.1	0.0057833	0.941317	0.000855771	1.92028
WBGene00008259		C52E4.7	0.030273	0.941199	0.00637747	1.92012
WBGene00010897	lact-3	M28.6	0.00126167	0.940285	0.000146936	1.91891
WBGene00020760		T24C4.4	0.04725	0.939905	0.0111305	1.9184
WBGene00008569	fbxa-101	F08A8.7	0.00300173	0.939624	0.000399526	1.91803
WBGene00021687		Y48G8AL.7	0.0195888	0.938705	0.00368531	1.91681
WBGene00003993	pgl-2	B0523.3	0.00283279	0.938224	0.000372514	1.91617
WBGene00007765		C27B7.9	0.0404035	0.93809	0.00911705	1.91599
WBGene00013307		Y57G11C.9	0.17271	0.937735	0.0630631	1.91552
WBGene00007578		C14B1.7	0.0149059	0.937518	0.00262857	1.91523
WBGene00022581		ZC262.4	0.129511	0.93663	0.042616	1.91405
WBGene00016179		C28C12.3	0.359218	0.9353	0.179619	1.91229
WBGene00018394		F43E2.6	0.0194249	0.934636	0.00365126	1.91141
WBGene00013442		Y66D12A.16	0.0277019	0.934523	0.00568628	1.91126
WBGene00015059		B0228.1	0.0225344	0.934029	0.00440055	1.9106
WBGene00011266		R13H4.8	0.0416838	0.93375	0.00949552	1.91023
WBGene00017411		F13A2.2	0.401039	0.93329	0.212317	1.90963
WBGene00044655	fbxa-194	M162.11	0.401039	0.933105	0.2123	1.90938
WBGene00008229		C50F4.1	0.00305936	0.932668	0.000408038	1.9088
WBGene00012848		Y44A6B.3	0.401505	0.932361	0.212675	1.9084
WBGene00007777		C27D8.1	0.00875249	0.932206	0.00138481	1.90819
WBGene00043948		ZC262.7	0.0227432	0.932155	0.00445291	1.90812
WBGene00004099	abu-15	C03A7.4	0.000486853	0.931852	5.06e-05	1.90772
WBGene00021930		Y55F3AM.13	0.00861633	0.931804	0.00135757	1.90766
WBGene00000745	col-172	F38B6.5	0.00355245	0.931541	0.000486133	1.90731
WBGene00044638		F23A7.8	0.00260042	0.931108	0.000336943	1.90674
WBGene00020100	mks-1	R148.1	0.337679	0.931015	0.163769	1.90662
WBGene00001803	lite-1	C14F11.3	0.0589089	0.930917	0.0148844	1.90649
WBGene00010747		K10D11.3	0.0416646	0.930592	0.00948843	1.90606
WBGene00018425		F44E7.3	0.146482	0.930541	0.0501777	1.90599
WBGene00164969		K09C8.9	0.257242	0.930267	0.110212	1.90563
WBGene00198873		F10C2.11	1	0.9301	0.197655	1.90541
WBGene00000671	col-96	Y41C4A.19	0.00209294	0.929822	0.000260925	1.90504
WBGene00012929	rsks-1	Y47D3A.16	0.000544129	0.928611	5.73e-05	1.90344
WBGene00007144		B0334.4	0.00141932	0.92851	0.000168032	1.90331
WBGene00011279	asd-1	R74.5	0.00213823	0.927839	0.000267986	1.90242
WBGene00011101		R07D5.2	0.188592	0.92748	0.0713247	1.90195
WBGene00021704		Y48G9A.11	0.0334824	0.927461	0.00722698	1.90193
WBGene00016731		C46H11.7	0.119515	0.926894	0.038155	1.90118
WBGene00021544		Y43B11AR.3	0.00584667	0.926786	0.000867725	1.90104
WBGene00011789		T15H9.4	0.058293	0.926722	0.0146696	1.90095
WBGene00012095	pssy-2	T27E9.5	0.00582516	0.926713	0.00086389	1.90094
WBGene00001736	grl-27	F40C5.3	0.0926445	0.926324	0.0270238	1.90043
WBGene00011869	dod-6	T20G5.7	0.00202712	0.925911	0.000251492	1.89988
WBGene00008950	wht-5	F19B6.4	0.0111354	0.925716	0.00185937	1.89963
WBGene00007591		C14H10.1	0.000863544	0.925434	9.51e-05	1.89926
WBGene00015014	bath-24	B0047.3	0.0643863	0.925129	0.0166745	1.89885
WBGene00013556		Y75B8A.23	0.0626624	0.924926	0.0161144	1.89859
WBGene00012815	phy-4	Y43F8B.4	0.40578	0.924493	0.216236	1.89802
WBGene00015578		C07G3.10	0.406747	0.923613	0.217086	1.89686
WBGene00009610	oac-28	F41D3.5	0.403344	0.92354	0.214182	1.89676
WBGene00009615	oac-25	F41D3.10	0.403344	0.92354	0.214182	1.89676
WBGene00007882		C33A12.3	0.000991671	0.923121	0.000111721	1.89621
WBGene00013758	fbxa-114	Y113G7B.7	0.0115526	0.922782	0.0019405	1.89577
WBGene00236786		C17H12.37	0.406747	0.92235	0.217165	1.8952
WBGene00009155	lhfp-4	F26D10.11	0.0380345	0.921542	0.00847562	1.89414
WBGene00021720		Y49F6B.8	0.0340532	0.919872	0.00738581	1.89195
WBGene00006463	nduf-2.2	T26A5.3	0.00097793	0.919821	0.000109742	1.89188
WBGene00017833		F26F12.2	0.147417	0.918967	0.0505872	1.89076
WBGene00017055		D2062.1	0.0775483	0.91791	0.0213779	1.88938
WBGene00206522		F14D2.19	0.0601728	0.917349	0.0152742	1.88864
WBGene00011528		T06D8.7	0.00213556	0.916213	0.000267415	1.88715
WBGene00045356		T03E6.9	0.379709	0.91593	0.194791	1.88679
WBGene00015679		C10F3.7	0.29418	0.915738	0.133266	1.88653
WBGene00023021		F32A5.9	0.00539762	0.915722	0.00078859	1.88651
WBGene00018693		F52E1.3	0.401039	0.915518	0.212281	1.88625
WBGene00189933		F38B7.11	0.411051	0.915276	0.220562	1.88593
WBGene00001756	gst-8	F11G11.1	0.296417	0.915261	0.134639	1.88591
WBGene00013561		Y75B8A.31	0.00307669	0.915093	0.000411367	1.88569
WBGene00019879		R05D3.5	0.103945	0.914783	0.0316038	1.88529
WBGene00022648		ZK54.3	0.217942	0.914432	0.0868574	1.88483
WBGene00077549		F11A6.3	0.339754	0.91422	0.165554	1.88455
WBGene00009445		F35G12.12	0.000405589	0.913929	4.14e-05	1.88417
WBGene00010639		K07F5.15	0.00173586	0.913731	0.000211915	1.88391
WBGene00013036	fbxa-218	Y49E10.17	0.304052	0.913524	0.140083	1.88364
WBGene00001785	gst-37	Y32G9A.1	0.403875	0.913488	0.214598	1.88359
WBGene00004859	sma-5	W06B3.2	0.00555426	0.912686	0.000816065	1.88255
WBGene00012585	lips-15	Y38E10A.7	0.0260506	0.912327	0.00526264	1.88208
WBGene00044439		Y51H7C.15	0.412406	0.91219	0.221651	1.8819
WBGene00018010		F33E11.2	0.0196735	0.912127	0.00370992	1.88182
WBGene00020070	rmd-6	R13H9.1	0.0155917	0.912074	0.00278367	1.88175
WBGene00044042		Y46G5A.37	0.386473	0.911832	0.200241	1.88143
WBGene00009458		F36A2.11	0.0455011	0.911701	0.0106082	1.88126
WBGene00219288		Y87G2A.25	0.382521	0.911388	0.197161	1.88085
WBGene00219905		F19F10.13	0.241262	0.911073	0.100309	1.88044
WBGene00017016	snap-1	D1014.3	0.000315594	0.910622	3.11e-05	1.87986
WBGene00195070		C16C8.20	0.367882	0.910605	0.185887	1.87983
WBGene00015030		B0207.7	0.049114	0.910465	0.0116859	1.87965
WBGene00007132		B0284.2	0.317964	0.910326	0.149554	1.87947
WBGene00013595	atg-4.1	Y87G2A.3	0.00168826	0.91031	0.000205545	1.87945
WBGene00007206		B0564.6	0.0294886	0.910178	0.00617609	1.87928
WBGene00007208		B0564.9	0.0294886	0.910178	0.00617609	1.87928
WBGene00008870		F15H9.1	0.15727	0.909658	0.0553892	1.8786
WBGene00015537		C06E4.8	0.130258	0.909611	0.0429592	1.87854
WBGene00194717		ZC239.22	0.024212	0.909551	0.00478984	1.87846
WBGene00017185		F07B7.1	0.331239	0.909348	0.159069	1.8782
WBGene00021106		W09B7.1	0.331239	0.909348	0.159069	1.8782
WBGene00007638		C17D12.3	0.391566	0.909322	0.20439	1.87816
WBGene00012945		Y47H9A.1	0.391566	0.909322	0.20439	1.87816
WBGene00198312		T21B10.10	0.413703	0.908906	0.222828	1.87762
WBGene00015837	math-8	C16C4.13	0.380905	0.908833	0.195992	1.87753
WBGene00021700		Y48G9A.6	0.40037	0.908713	0.21168	1.87737
WBGene00014058		ZK673.2	0.00135645	0.908415	0.000159543	1.87698
WBGene00013624	srbc-80	Y102A5C.20	0.323766	0.907826	0.153785	1.87622
WBGene00000660	col-85	T21B4.2	0.413014	0.907462	0.222252	1.87574
WBGene00022236		Y73B6BL.12	0.413014	0.907462	0.222252	1.87574
WBGene00016039		C24A8.5	0.396583	0.907388	0.208473	1.87565
WBGene00012549		Y37D8A.8	0.24093	0.907309	0.100068	1.87554
WBGene00015989		C18H2.2	0.0150883	0.906925	0.00266905	1.87504
WBGene00012566	fbxa-211	Y37H2A.6	0.053836	0.90674	0.0132277	1.8748
WBGene00044486		Y54G2A.42	0.408017	0.90579	0.218057	1.87357
WBGene00002045	icd-1	C56C10.8	0.000273704	0.905759	2.64e-05	1.87353
WBGene00013304		Y57G11C.6	0.0317785	0.905625	0.0067699	1.87336
WBGene00021631		Y47D9A.4	0.272459	0.904928	0.119479	1.87245
WBGene00006840	unc-116	R05D3.7	0.00053312	0.904875	5.6e-05	1.87238
WBGene00043982		B0403.6	0.0942754	0.904772	0.0276563	1.87225
WBGene00010195	pot-2	F57C2.3	0.0510462	0.904449	0.0123538	1.87183
WBGene00008995	prde-1	F21A3.5	0.00920578	0.904387	0.00147378	1.87175
WBGene00007787		C27H6.8	0.00045807	0.904104	4.71e-05	1.87138
WBGene00235373		Y24D9A.14	0.393141	0.903864	0.205645	1.87107
WBGene00000474	cey-3	M01E11.5	0.00789787	0.903851	0.00123089	1.87105
WBGene00018397		F43E2.11	0.163633	0.903757	0.0584776	1.87093
WBGene00023066		F53F10.7	0.41805	0.903673	0.226298	1.87082
WBGene00044753		F49H12.7	0.418293	0.903518	0.226733	1.87062
WBGene00001960	hlh-16	DY3.3	0.419599	0.901474	0.227838	1.86797
WBGene00194986		T27F7.4	0.00150183	0.901071	0.000178958	1.86745
WBGene00022108		Y71F9AL.2	0.0156184	0.900921	0.00278979	1.86726
WBGene00219780		B0228.10	0.215845	0.900841	0.0856851	1.86715
WBGene00008185	best-10	C49A1.2	0.149121	0.90002	0.0513281	1.86609
WBGene00000273	brp-1	Y79H2A.1	0.00355743	0.89955	0.000487677	1.86548
WBGene00018025		F35A5.2	0.129253	0.899505	0.0424955	1.86543
WBGene00009948		F52H3.6	0.0119806	0.899286	0.00203153	1.86514
WBGene00008616	fbxa-44	F09C6.2	0.263028	0.899052	0.113655	1.86484
WBGene00021632		Y47D9A.5	0.101145	0.898982	0.0304152	1.86475
WBGene00016627		C44B7.5	0.00910958	0.898604	0.00145436	1.86426
WBGene00021079		W08A12.2	0.051635	0.898599	0.0125475	1.86425
WBGene00001087	dpy-28	Y39A1B.3	0.00130505	0.898483	0.000152635	1.86411
WBGene00003237	mif-4	Y73B6BL.13	0.25993	0.898024	0.111894	1.86351
WBGene00001831	hcp-3	F58A4.3	0.00489242	0.897902	0.000704808	1.86335
WBGene00006435	stdh-4	F25G6.5	0.421508	0.897867	0.229224	1.86331
WBGene00018155		F37C12.14	1	0.897666	0.212603	1.86305
WBGene00016621	arch-1	C43H8.1	0.0119209	0.897636	0.00201615	1.86301
WBGene00016931		C54G6.2	0.421824	0.897469	0.229609	1.8628
WBGene00016249	mrpl-32	C30C11.1	0.00232377	0.897271	0.000295336	1.86254
WBGene00021275	dmsr-2	Y23H5B.4	0.0548226	0.897214	0.0135576	1.86247
WBGene00017170		F01G12.1	0.418081	0.896892	0.226407	1.86205
WBGene00022248		Y73B6BL.27	0.0170663	0.896436	0.0031092	1.86146
WBGene00009503		F37A8.5	0.00951001	0.89628	0.00153139	1.86126
WBGene00015898	sre-9	C17E7.3	1	0.896097	0.212728	1.86102
WBGene00044562		C14E2.7	1	0.896097	0.212728	1.86102
WBGene00012295	nmat-1	W06B3.1	0.0278028	0.895228	0.00570851	1.8599
WBGene00023400		ZK380.3	0.374876	0.894657	0.19099	1.85917
WBGene00009401		F35C11.2	0.0180994	0.894516	0.00333631	1.85899
WBGene00195728		T28D9.13	0.423937	0.894148	0.231633	1.85851
WBGene00011662		T09F3.2	0.00131898	0.894049	0.000154554	1.85838
WBGene00016947		C55B7.11	0.0161452	0.893875	0.0029067	1.85816
WBGene00019133		F59H6.2	0.304459	0.893757	0.140421	1.85801
WBGene00189946		W04E12.10	0.424443	0.893679	0.231957	1.85791
WBGene00013495	clec-236	Y70C5C.5	0.0514016	0.893232	0.0124857	1.85733
WBGene00016781		C49G7.3	0.00397572	0.893112	0.000554568	1.85718
WBGene00020021		R12B2.7	0.410386	0.892935	0.219892	1.85695
WBGene00013159		Y53F4B.12	0.077271	0.892833	0.0212706	1.85682
WBGene00013085	mpz-6	Y51B9A.3	0.155628	0.892388	0.0544595	1.85625
WBGene00021793		Y52D5A.2	0.146988	0.892338	0.0504197	1.85618
WBGene00021030		W04H10.1	0.33735	0.892203	0.16349	1.85601
WBGene00017035		D1065.3	0.120465	0.892078	0.0385578	1.85585
WBGene00012567		Y37H2A.7	0.179421	0.891862	0.0665809	1.85557
WBGene00006890	vem-1	K07E3.8	0.0100446	0.890963	0.00163514	1.85441
WBGene00010736	istr-1	K10C8.3	0.000728504	0.890881	7.87e-05	1.85431
WBGene00013829		Y116F11B.14	0.426652	0.890816	0.233775	1.85422
WBGene00004422	rpl-11.1	T22F3.4	0.000374166	0.89067	3.78e-05	1.85404
WBGene00002250	lap-2	W07G4.4	0.000156747	0.890655	1.41e-05	1.85402
WBGene00001237	elc-2	W03H1.2	0.388037	0.890566	0.201607	1.8539
WBGene00235315		Y50D4A.10	0.225708	0.890541	0.0914789	1.85387
WBGene00044453		Y102E9.6	0.425403	0.889951	0.232795	1.85311
WBGene00002348	myo-1	R06C7.10	0.00313051	0.889677	0.000419538	1.85276
WBGene00008372		D1054.5	0.0038018	0.889314	0.000526539	1.8523
WBGene00008169		C48B4.6	0.026131	0.889244	0.00528177	1.85221
WBGene00017977		F32B5.3	0.399094	0.888977	0.210584	1.85186
WBGene00008085		C44C10.4	0.0832184	0.888806	0.0234545	1.85164
WBGene00006395	taf-11.3	F43D9.5	0.0514016	0.888762	0.0124878	1.85159
WBGene00010690		K08H2.3	0.324282	0.888699	0.154138	1.85151
WBGene00004353	rgs-10	F45B8.2	0.424452	0.888661	0.231985	1.85146
WBGene00022400	rpb-9	Y97E10AR.5	0.00396081	0.888506	0.000551987	1.85126
WBGene00009233		F28H6.4	0.0283102	0.888367	0.00585705	1.85108
WBGene00012898		Y46G5A.6	0.171487	0.888305	0.0624371	1.851
WBGene00020898		T28D9.9	0.170035	0.88812	0.0616742	1.85076
WBGene00017872		F28A10.4	0.240017	0.887627	0.0994739	1.85013
WBGene00004906	snf-7	ZK1010.9	0.0536856	0.887372	0.0131818	1.8498
WBGene00015970		C18E3.1	0.0540174	0.887237	0.0132931	1.84963
WBGene00012281		W05E10.2	0.362219	0.887165	0.181768	1.84954
WBGene00010246		F58D5.7	0.0228823	0.887099	0.0044852	1.84945
WBGene00021971		Y57G7A.8	0.383566	0.887062	0.197975	1.84941
WBGene00021541		Y42H9B.3	0.0279416	0.886425	0.00575102	1.84859
WBGene00015850		C16C8.12	0.153859	0.886373	0.0536539	1.84852
WBGene00011102		R07E3.1	0.00239393	0.885708	0.00030544	1.84767
WBGene00009310		F32A11.5	0.42873	0.88536	0.235315	1.84723
WBGene00008245	fipr-10	C50H2.12	0.0340532	0.884913	0.00738396	1.84665
WBGene00044569		C25F6.8	0.156611	0.884706	0.0550622	1.84639
WBGene00002208	kin-26	T06C10.6	0.0729905	0.884658	0.0197124	1.84633
WBGene00015305		C01G5.3	0.0566617	0.884641	0.0141346	1.8463
WBGene00015458		C04G6.10	0.0440103	0.884593	0.0101443	1.84624
WBGene00002212	kin-31	B0523.1	0.0301664	0.883976	0.00634339	1.84545
WBGene00007323	fbxa-155	C05B5.6	0.0559398	0.883821	0.0139171	1.84526
WBGene00011849		T19H5.4	0.0028742	0.883722	0.000380018	1.84513
WBGene00017235		F08B4.3	0.04766	0.883353	0.011256	1.84466
WBGene00008003	enu-3.2	C38D4.1	0.00247151	0.882721	0.000316836	1.84385
WBGene00003038	lin-56	ZK673.3	0.00982012	0.88243	0.00158751	1.84348
WBGene00007273		C03C10.7	0.399543	0.882028	0.210953	1.84296
WBGene00010458	mrpl-10	K01C8.6	0.00216736	0.881705	0.000272353	1.84255
WBGene00003920	par-5	M117.2	0.000440956	0.88165	4.52e-05	1.84248
WBGene00009050		F22D6.2	0.0128908	0.881606	0.00221854	1.84243
WBGene00020978		W03B1.9	0.0644138	0.881235	0.0166878	1.84195
WBGene00001677	gpa-15	M04C7.1	0.303217	0.880824	0.139431	1.84143
WBGene00001311	end-3	F58E10.5	0.427989	0.880348	0.23479	1.84082
WBGene00008027	scl-5	C39E9.2	0.194387	0.880215	0.0743407	1.84065
WBGene00021759		Y50D7A.11	0.0555984	0.879814	0.0138046	1.84014
WBGene00001482	fog-2	Y113G7B.5	0.029908	0.879593	0.00627751	1.83986
WBGene00000985	dhs-22	C15H11.4	0.000506725	0.879369	5.3e-05	1.83957
WBGene00013544		Y75B8A.7	0.00309672	0.879353	0.000414557	1.83955
WBGene00006688	twk-36	R12G8.2	0.292482	0.879022	0.132078	1.83913
WBGene00020459	fbxa-23	T12B5.13	0.410328	0.878977	0.219835	1.83907
WBGene00018114	srt-41	F36H9.6	0.41895	0.878946	0.227247	1.83903
WBGene00013882	msa-1	ZC410.5	0.0345813	0.878514	0.00754227	1.83848
WBGene00013220	ctl-3	Y54G11A.13	0.0230656	0.878142	0.00453383	1.83801
WBGene00011550		T06G6.11	0.430065	0.877941	0.236522	1.83775
WBGene00007173		B0393.8	0.0861338	0.877939	0.0246273	1.83775
WBGene00012146		VB0393L.2	0.0861338	0.877939	0.0246273	1.83775
WBGene00007008	rfp-1	R05D3.4	0.00147321	0.877832	0.000175305	1.83761
WBGene00012668		Y39B6A.5	0.0059531	0.877686	0.000887456	1.83743
WBGene00020342	fbxa-201	T08B1.5	0.16263	0.877036	0.0579284	1.8366
WBGene00007778		C27D8.2	0.00987592	0.876943	0.00160065	1.83648
WBGene00044005		F37C12.18	0.050449	0.876566	0.0121592	1.836
WBGene00219305		W02G9.10	0.117024	0.876185	0.0371213	1.83552
WBGene00009797		F46G10.2	0.00586882	0.876183	0.000871658	1.83551
WBGene00014013		ZK632.4	0.000337298	0.876094	3.36e-05	1.8354
WBGene00013647		Y105C5B.5	0.0322219	0.875857	0.00688923	1.8351
WBGene00010717		K09C8.7	0.160822	0.875773	0.0570126	1.83499
WBGene00019090		F59A7.2	0.0111322	0.875747	0.00185823	1.83496
WBGene00007010	alx-1	R10E12.1	0.00572049	0.875312	0.000845846	1.8344
WBGene00016507	abhd-5.2	C37H5.3	0.00157894	0.874791	0.000190322	1.83374
WBGene00044174	fipr-5	C12D8.18	0.0518445	0.874054	0.0126041	1.83281
WBGene00001748	gsp-2	F56C9.1	0.00195074	0.873193	0.000240618	1.83171
WBGene00011049	sdz-26	R06A4.6	0.437336	0.873016	0.243339	1.83149
WBGene00009097	fipr-2	F23H12.9	0.00369917	0.872947	0.000510287	1.8314
WBGene00022102		Y69F12A.1	0.0497029	0.872581	0.0119109	1.83094
WBGene00020106		R151.1	0.102125	0.872329	0.0308255	1.83062
WBGene00018311		F41G4.8	0.0957278	0.871602	0.0282458	1.82969
WBGene00017021		D1022.2	0.433795	0.871531	0.239768	1.8296
WBGene00005655	srr-4	K11D12.3	0.0205057	0.871471	0.00390412	1.82953
WBGene00023276		F25B4.3	0.143092	0.871356	0.0485119	1.82938
WBGene00018203		F39F10.3	0.416036	0.871227	0.224704	1.82922
WBGene00000611	col-34	F36A4.10	0.00132137	0.871072	0.000154907	1.82902
WBGene00003390	mog-2	H20J04.8	0.00264734	0.870053	0.000344626	1.82773
WBGene00022043	psf-3	Y65B4BR.8	0.0241138	0.869895	0.00476775	1.82753
WBGene00009266		F30A10.9	0.00355743	0.86977	0.000487756	1.82737
WBGene00008146		C47E8.9	0.280925	0.869317	0.124884	1.8268
WBGene00012185		W01F3.2	0.0342127	0.869202	0.00742606	1.82665
WBGene00010262	droe-4	F58E10.7	0.0399891	0.868944	0.00899521	1.82633
WBGene00009917	glb-18	F52A8.4	0.0576667	0.868663	0.0144707	1.82597
WBGene00016930	madf-6	C54G6.1	0.0539205	0.868383	0.0132662	1.82562
WBGene00017549	pid-1	F18A1.8	0.0225641	0.868215	0.00440915	1.8254
WBGene00021047	zfp-3	W05H7.4	0.0549124	0.867152	0.0135834	1.82406
WBGene00021014		W03G9.2	0.0277019	0.866768	0.00568487	1.82357
WBGene00002998	lin-9	ZK637.7	0.00137959	0.865327	0.000162638	1.82175
WBGene00006603	tps-2	F19H8.1	0.0154148	0.864982	0.00274293	1.82132
WBGene00022101		Y69A2AR.32	0.00605367	0.864568	0.000903782	1.82079
WBGene00014168		ZK945.6	0.110558	0.864504	0.0343209	1.82071
WBGene00013739	spin-4	Y111B2A.19	0.0199631	0.86447	0.00377773	1.82067
WBGene00021271	spe-47	Y23H5A.4	0.0555164	0.864455	0.0137659	1.82065
WBGene00020841		T27A3.5	0.0116785	0.86402	0.00196615	1.8201
WBGene00006739	ulp-4	C41C4.6	0.00162948	0.863381	0.000197132	1.8193
WBGene00003597	nhl-1	F54G8.4	0.0122313	0.863021	0.00208347	1.81884
WBGene00020682		T22D1.3	0.00834391	0.862989	0.0013096	1.8188
WBGene00013055		Y50E8A.12	0.0474031	0.862703	0.0111796	1.81844
WBGene00019779		M60.2	0.00476256	0.862279	0.000681902	1.81791
WBGene00001786	gst-38	F35E8.8	0.0290537	0.861898	0.00606779	1.81743
WBGene00013647		Y105C5B.5	0.00674067	0.861769	0.00102529	1.81727
WBGene00003460	msp-71	F59A6.8	0.0691818	0.861444	0.0183253	1.81686
WBGene00020886	ttr-6	T28B4.3	0.0122193	0.860545	0.00208013	1.81572
WBGene00010047		F54D1.6	0.00223369	0.860305	0.000282164	1.81542
WBGene00000409	cdk-8	F39H11.3	0.00254205	0.860284	0.000327279	1.8154
WBGene00016949		C55C2.3	0.32145	0.860087	0.152023	1.81515
WBGene00022537		ZC190.2	0.445592	0.859896	0.250486	1.81491
WBGene00021342		Y35H6.3	0.0453646	0.859887	0.010566	1.8149
WBGene00018878	glit-1	F55D10.3	0.0278377	0.859627	0.00572029	1.81457
WBGene00022249		Y73B6BL.28	0.436772	0.85936	0.242731	1.81423
WBGene00195226		ZC404.16	0.44197	0.859301	0.247184	1.81416
WBGene00009755		F46A9.2	0.10522	0.859153	0.032096	1.81397
WBGene00013279		Y57A10B.7	0.0489771	0.858867	0.0116345	1.81361
WBGene00017632		F20B6.9	0.442136	0.858812	0.24735	1.81354
WBGene00008844		F15A4.10	0.44469	0.858781	0.249783	1.81351
WBGene00021795		Y52E8A.2	0.0852916	0.85844	0.0242784	1.81308
WBGene00195253		H16D19.5	0.312422	0.857807	0.145643	1.81228
WBGene00007863		C32C4.3	0.096251	0.857779	0.0284739	1.81225
WBGene00009473		F36D3.8	0.128114	0.85739	0.0420295	1.81176
WBGene00013158		Y53F4B.11	0.0162873	0.857305	0.00293677	1.81165
WBGene00010650		K08C9.1	0.107617	0.857227	0.0330598	1.81155
WBGene00016780		C49G7.1	0.0844766	0.856921	0.0239487	1.81117
WBGene00206508		ZK262.19	0.425391	0.856555	0.232756	1.81071
WBGene00005910	srx-19	T05A12.1	0.430346	0.856482	0.236795	1.81062
WBGene00015322		C02B8.3	0.101642	0.856444	0.0306068	1.81057
WBGene00009166		F26F2.1	0.411367	0.856108	0.220839	1.81015
WBGene00014678		C15H7.2	0.161355	0.855881	0.0572901	1.80986
WBGene00235304		Y116A8C.468	0.382951	0.85537	0.197488	1.80922
WBGene00012148	inos-1	VF13D12L.1	0.00284169	0.855334	0.000374148	1.80918
WBGene00003071	lrp-1	F29D11.1	0.00156481	0.855168	0.000188274	1.80897
WBGene00013856		ZC168.2	0.431053	0.855082	0.237302	1.80886
WBGene00009272	gras-1	F30F8.3	0.010343	0.855051	0.00169914	1.80882
WBGene00194705		Y39F10C.2	0.385731	0.854619	0.199708	1.80828
WBGene00045038		F13G11.3	0.028387	0.853835	0.00588476	1.8073
WBGene00019151	pck-3	H04M03.1	0.0211805	0.853342	0.00405944	1.80668
WBGene00194679		T26C11.9	0.329357	0.853207	0.157747	1.80651
WBGene00011012		R04D3.4	0.398682	0.85302	0.210257	1.80628
WBGene00011549		T06G6.8	0.240008	0.852995	0.0994302	1.80625
WBGene00011607		T08D2.2	0.0650853	0.852863	0.0169454	1.80608
WBGene00235163		Y108G3AL.10	0.384948	0.852838	0.199048	1.80605
WBGene00000208	asc-1	Y53F4B.15	0.00257944	0.852466	0.000333514	1.80558
WBGene00011408		T04A8.6	0.00526661	0.851862	0.000767204	1.80483
WBGene00013482		Y69H2.7	0.00799439	0.851558	0.00124813	1.80445
WBGene00017304		F09F7.7	0.0165269	0.851114	0.00299364	1.80389
WBGene00003389	mog-1	K03H1.2	0.000649337	0.850506	6.94e-05	1.80313
WBGene00015230	tag-344	B0511.4	0.0539205	0.850396	0.0132656	1.803
WBGene00013610	fbxa-206	Y102A5C.1	0.0924561	0.850208	0.0269341	1.80276
WBGene00012971		Y48A6B.10	0.0200062	0.850199	0.00378698	1.80275
WBGene00012432		Y11D7A.8	0.39761	0.850143	0.209536	1.80268
WBGene00011551		T06G6.12	0.1264	0.850132	0.041272	1.80267
WBGene00016533		C39D10.6	0.260005	0.849855	0.111963	1.80232
WBGene00010243		F58D5.3	0.418956	0.849242	0.227273	1.80155
WBGene00003755	nlp-17	Y45F10A.5	0.0563882	0.848729	0.0140417	1.80091
WBGene00008724		F13A7.1	0.0290714	0.848676	0.0060731	1.80085
WBGene00018109	fbxb-12	F36H5.11	0.450731	0.848457	0.255336	1.80057
WBGene00020639	fbxa-71	T20H9.3	0.307366	0.848298	0.142304	1.80038
WBGene00000610	col-33	F36A4.6	0.0287998	0.848077	0.00600041	1.8001
WBGene00008949		F19B6.3	0.146647	0.847992	0.0502505	1.79999
WBGene00008840		F15A4.5	0.201777	0.847602	0.0783452	1.79951
WBGene00011817		T16H12.9	0.0686631	0.847491	0.0181228	1.79937
WBGene00235326		F22F7.11	0.443104	0.846727	0.248208	1.79842
WBGene00014061		ZK673.5	0.454054	0.846624	0.257869	1.79829
WBGene00016085		C25A8.5	0.0391397	0.846411	0.00876287	1.79802
WBGene00021270		Y23H5A.3	0.00306717	0.845784	0.000409586	1.79724
WBGene00011426		T04C10.3	0.454683	0.845647	0.258327	1.79707
WBGene00020218		T04G9.7	0.0617379	0.845106	0.0158188	1.7964
WBGene00001715	grl-6	K10C2.5	0.367033	0.845094	0.185175	1.79638
WBGene00022735		ZK418.6	0.0542476	0.844729	0.0133647	1.79593
WBGene00000144	apc-10	F15H10.3	0.0438024	0.844539	0.0100722	1.79569
WBGene00000206	asb-1	F35G12.10	0.0037451	0.84445	0.00051786	1.79558
WBGene00012988	ztf-22	Y48C3A.4	0.0382333	0.844406	0.00853046	1.79553
WBGene00010587	sol-2	K05C4.11	0.122255	0.844308	0.0393598	1.7954
WBGene00044536		F14F9.8	0.362436	0.843932	0.182013	1.79494
WBGene00000876	cyl-1	C52E4.6	0.0018587	0.843187	0.000228344	1.79401
WBGene00007868		C32H11.5	0.0988759	0.843104	0.0294797	1.79391
WBGene00045394		ZK813.7	0.00493398	0.843101	0.000712155	1.7939
WBGene00017675		F21F3.6	0.00150322	0.843043	0.000179207	1.79383
WBGene00016330		C32E12.4	0.00268655	0.842305	0.000351211	1.79291
WBGene00009752		F46A8.9	0.172438	0.842264	0.0629317	1.79286
WBGene00050946		M162.12	0.385415	0.842254	0.199357	1.79285
WBGene00044448		ZK783.6	0.0321535	0.84214	0.0068696	1.79271
WBGene00018101	math-27	F36H5.2	0.0147982	0.842093	0.00260369	1.79265
WBGene00010077		F55A11.4	0.243814	0.842013	0.101719	1.79255
WBGene00022812		ZK742.2	0.00441324	0.841717	0.000624107	1.79218
WBGene00001386	far-2	F02A9.3	0.00039301	0.841435	4.01e-05	1.79183
WBGene00021660		Y48G1A.4	0.00459551	0.841402	0.000654187	1.79179
WBGene00006063	sto-1	F08C6.4	0.00695171	0.841264	0.00106237	1.79162
WBGene00006038	ssp-9	E03H12.10	0.0852682	0.841156	0.024267	1.79149
WBGene00017834		F26F12.3	0.000486283	0.841086	5.04e-05	1.7914
WBGene00015974		C18E3.5	0.00781676	0.84103	0.00121566	1.79133
WBGene00009937	lsl-1	F52F12.4	0.0143853	0.840698	0.00251933	1.79092
WBGene00012210		W02D9.4	0.100934	0.840585	0.0303214	1.79078
WBGene00004244	puf-8	C30G12.7	0.0107114	0.839925	0.00177088	1.78996
WBGene00022027	vps-20	Y65B4A.3	0.00285256	0.839456	0.000376056	1.78938
WBGene00022748	oaz-1	ZK484.1	0.00318959	0.839376	0.0004298	1.78928
WBGene00017294		F09E10.1	0.337485	0.839287	0.163574	1.78917
WBGene00013707		Y106G6E.3	0.444504	0.83924	0.249577	1.78911
WBGene00016796	cec-2	C50A2.2	0.0114321	0.839094	0.00191629	1.78893
WBGene00020896		T28D9.4	0.0363193	0.838669	0.00803193	1.7884
WBGene00011770		T14G8.2	0.296379	0.838619	0.134588	1.78834
WBGene00012004	dyrb-1	T24H10.6	0.00555637	0.838154	0.000816682	1.78776
WBGene00019450		K06H6.2	0.448672	0.838055	0.25365	1.78764
WBGene00014870		Y37H9A.4	0.329743	0.83755	0.158078	1.78701
WBGene00007555	dohh-1	C14A4.1	0.00738647	0.837191	0.00113898	1.78657
WBGene00016803	bath-42	C50C3.8	0.00137895	0.837189	0.000162417	1.78657
WBGene00018163		F38A5.6	0.128114	0.837069	0.0420244	1.78642
WBGene00018519		F46H5.3	0.00806316	0.83687	0.0012602	1.78617
WBGene00011467	decr-1.3	T05C12.3	0.0570389	0.836862	0.0142629	1.78616
WBGene00201991		C07G1.14	0.459418	0.836847	0.262358	1.78614
WBGene00016073		C24H12.4	0.00130429	0.836658	0.000152474	1.78591
WBGene00219680	linc-35	F22D3.10	0.417987	0.836591	0.22617	1.78582
WBGene00003184	mei-2	F57B10.12	0.022497	0.836292	0.00438435	1.78546
WBGene00017550	nep-6	F18A12.1	0.0750557	0.836138	0.0204509	1.78527
WBGene00020743	mam-8	T23H2.4	0.0514016	0.836083	0.0124749	1.7852
WBGene00017166	aldo-2	F01F1.12	0.0273288	0.836016	0.0055856	1.78511
WBGene00016332		C32F10.4	0.0117929	0.835934	0.00198966	1.78501
WBGene00001328	epi-1	K08C7.3	0.0015923	0.835703	0.000192107	1.78473
WBGene00016807		C50D2.3	0.170087	0.835564	0.0617086	1.78455
WBGene00012720		Y39E4B.11	0.0522964	0.835546	0.0127692	1.78453
WBGene00006380	tab-1	F31E8.3	1	0.835533	0.253314	1.78452
WBGene00016084	cht-3	C25A8.4	0.00788674	0.835312	0.00122872	1.78424
WBGene00077636		Y46G5A.43	0.166846	0.834913	0.0600854	1.78375
WBGene00015549		C06G3.3	0.401238	0.834591	0.212501	1.78335
WBGene00019141	bath-5	F59H6.11	0.0287681	0.83455	0.00598596	1.7833
WBGene00012059		T26G10.1	0.00620448	0.834466	0.000931082	1.7832
WBGene00007785	tofu-1	C27H6.3	0.00447421	0.834374	0.00063544	1.78308
WBGene00014949		Y75B12A.1	0.28053	0.83428	0.124575	1.78297
WBGene00019436		K06A9.2	0.10557	0.833357	0.0322492	1.78183
WBGene00022752		ZK484.6	0.0686794	0.832538	0.0181473	1.78082
WBGene00013894		ZC434.8	0.00098893	0.832402	0.000111295	1.78065
WBGene00015809		C16A3.4	0.0018909	0.832382	0.000232717	1.78062
WBGene00008627		F09F3.5	0.464257	0.831738	0.266321	1.77983
WBGene00015942	osta-2	C18A3.4	0.00156917	0.831313	0.000188885	1.7793
WBGene00010457		K01C8.2	0.122431	0.831031	0.0394501	1.77896
WBGene00002193	kin-5	T13H10.1	0.048	0.830704	0.0113468	1.77855
WBGene00000498	chk-1	Y39H10A.7	0.00667099	0.830572	0.00101175	1.77839
WBGene00008438		DH11.5	0.24566	0.83057	0.102842	1.77839
WBGene00015505		C06A5.8	0.0500608	0.830543	0.0120298	1.77835
WBGene00016765		C49C8.1	0.0543681	0.830312	0.0134148	1.77807
WBGene00015313	hpo-32	C01G8.6	0.0023221	0.830155	0.000294868	1.77788
WBGene00005091	srd-13	C39H7.7	0.461835	0.830143	0.26412	1.77786
WBGene00017117	fbxb-80	E04A4.2	0.465195	0.829705	0.267215	1.77732
WBGene00013143		Y53C12B.1	0.00490848	0.82914	0.000707933	1.77663
WBGene00022457		Y110A7A.7	0.0106526	0.829118	0.00175827	1.7766
WBGene00001446	flp-3	W07E11.2	0.0290958	0.828802	0.0060814	1.77621
WBGene00015026		B0207.1	0.102074	0.828658	0.0307875	1.77603
WBGene00018531		F47B3.7	0.0554898	0.828043	0.0137563	1.77528
WBGene00012505		Y26D4A.8	0.34104	0.827798	0.166687	1.77497
WBGene00000244	bbs-8	T25F10.5	0.154179	0.827694	0.0537996	1.77485
WBGene00000645	col-69	K01A2.7	0.0744807	0.827511	0.0202409	1.77462
WBGene00019132	bath-19	F59H6.1	0.179051	0.827	0.0664242	1.77399
WBGene00011431		T04D3.1	0.394619	0.826999	0.206788	1.77399
WBGene00001667	gpa-5	F53B1.7	0.458339	0.826896	0.261389	1.77386
WBGene00011277		R53.8	1	0.826859	0.2583	1.77382
WBGene00010890	ddb-1	M18.5	0.00174019	0.826502	0.000212731	1.77338
WBGene00019374		K04A8.2	0.390208	0.826439	0.20338	1.7733
WBGene00013047		Y50E8A.2	0.328353	0.826327	0.156934	1.77317
WBGene00012351		W09C5.1	0.00718754	0.825844	0.00110316	1.77257
WBGene00001946	his-72	Y49E10.6	0.00582516	0.823766	0.00086358	1.77002
WBGene00019951		R08C7.8	0.0870794	0.823501	0.0249696	1.7697
WBGene00003010	lin-24	B0001.1	0.00914508	0.82342	0.00146154	1.7696
WBGene00000910	daf-14	F01G10.8	0.00675435	0.822998	0.00102811	1.76908
WBGene00050879		D1081.11	0.244006	0.822737	0.101853	1.76876
WBGene00010617		K07A1.13	0.0381193	0.822734	0.00849872	1.76875
WBGene00017637		F20D6.8	0.0707824	0.822667	0.01892	1.76867
WBGene00005011		F26F4.8	0.033144	0.82228	0.0071302	1.7682
WBGene00017971		F32A5.8	0.00498298	0.821983	0.000720325	1.76783
WBGene00014223		ZK1098.6	0.0836948	0.821956	0.0236302	1.7678
WBGene00022659		ZK112.3	0.32481	0.821943	0.154478	1.76779
WBGene00023429		W08G11.6	1	0.821113	0.260771	1.76677
WBGene00011683	phat-6	T10B10.6	0.0334863	0.820642	0.00722966	1.76619
WBGene00012605		Y38F1A.1	0.025513	0.820104	0.00510766	1.76553
WBGene00005183	srg-26	C10G8.1	0.465243	0.820008	0.267325	1.76542
WBGene00005523	sri-11	T22H2.3	0.380657	0.819871	0.19576	1.76525
WBGene00000508	cit-1.2	F44B9.3	0.00251679	0.819578	0.000323538	1.76489
WBGene00019568		K09D9.11	0.227347	0.819245	0.0923566	1.76448
WBGene00022405	srsx-6	Y97E10B.3	0.465613	0.81853	0.267845	1.76361
WBGene00010048		F54D5.2	0.0369727	0.818182	0.00820236	1.76318
WBGene00219425		Y54G2A.73	0.0940558	0.817727	0.0275659	1.76263
WBGene00044728		Y53F4B.45	0.0501654	0.817615	0.0120598	1.76249
WBGene00014036		ZK643.5	0.00904736	0.817535	0.00144144	1.76239
WBGene00002274	lec-11	F38A5.3	0.265705	0.817279	0.115229	1.76208
WBGene00017762		F23H11.7	0.283453	0.817277	0.126454	1.76208
WBGene00009979	cutl-1	F53F1.1	0.471864	0.817228	0.273859	1.76202
WBGene00006744	unc-4	F26C11.2	0.40661	0.817124	0.216945	1.76189
WBGene00001855	hil-4	C18G1.5	0.00168307	0.817013	0.000204728	1.76176
WBGene00009684	msd-3	F44D12.7	0.148831	0.816851	0.0511709	1.76156
WBGene00019831		R02F2.1	0.0125467	0.816562	0.00214964	1.7612
WBGene00020140	ant-1.4	T01B11.4	0.0161955	0.81654	0.00291843	1.76118
WBGene00004444	rpl-30	Y106G6H.3	0.00356875	0.816518	0.000489544	1.76115
WBGene00010574		K04H4.5	0.0345166	0.815918	0.00751675	1.76042
WBGene00022568		ZC239.5	0.345375	0.815798	0.169729	1.76027
WBGene00010723	cpg-7	K09E4.6	0.003843	0.815601	0.000533727	1.76003
WBGene00020334	epg-7	T08A9.1	0.0188975	0.815501	0.0035157	1.75991
WBGene00022161		Y71G12B.26	0.331204	0.815212	0.159009	1.75956
WBGene00017841		F26G1.5	0.00525387	0.814901	0.000764983	1.75918
WBGene00007744		C26D10.3	0.0836822	0.814158	0.0236104	1.75827
WBGene00004373	rme-1	W06H8.1	0.00117909	0.814113	0.000135953	1.75822
WBGene00016211	sdz-3	C29F5.2	0.174537	0.813864	0.0639995	1.75791
WBGene00009000	arrd-28	F21A10.4	0.388094	0.813656	0.201658	1.75766
WBGene00021104		W09B6.4	0.0177287	0.813643	0.0032543	1.75764
WBGene00012927		Y47D3A.14	0.0326383	0.813473	0.00699263	1.75744
WBGene00021667	snpc-3.2	Y48G1BM.1	0.0565026	0.81344	0.014079	1.7574
WBGene00020488		T13G4.1	0.47473	0.813255	0.276908	1.75717
WBGene00022632		ZC581.2	0.0896316	0.813247	0.0258687	1.75716
WBGene00019767	rpa-2	M04F3.1	0.00163229	0.812945	0.000197562	1.75679
WBGene00003859	oig-1	C09E7.3	0.293711	0.812647	0.132956	1.75643
WBGene00015951		C18A11.6	1	0.812505	0.26583	1.75626
WBGene00201211		T23E1.7	1	0.812505	0.26583	1.75626
WBGene00219750		Y38C1AA.19	1	0.812468	0.25379	1.75621
WBGene00016890	lst-5	C52E12.6	0.0836948	0.811897	0.0236268	1.75552
WBGene00007028	trr-1	C47D12.1	0.00257616	0.811643	0.000332663	1.75521
WBGene00021192		Y14H12B.2	0.0192405	0.811501	0.0035954	1.75504
WBGene00018001		F33D11.2	0.075524	0.811461	0.020616	1.75499
WBGene00044979		Y41E3.19	0.180013	0.811301	0.0668503	1.75479
WBGene00000473	cey-2	F46F11.2	0.0534126	0.811248	0.0131031	1.75473
WBGene00010271		F58G1.9	0.277302	0.810848	0.122546	1.75424
WBGene00019722		M02A10.1	0.472867	0.810775	0.275058	1.75415
WBGene00009243		F29C6.1	0.427748	0.810649	0.234635	1.754
WBGene00010699	trpp-6	K08H10.9	0.00985753	0.810582	0.00159712	1.75392
WBGene00006987	zmp-1	EGAP1.3	0.14503	0.810573	0.0495045	1.75391
WBGene00206376		F47E1.17	0.380782	0.810506	0.195845	1.75383
WBGene00017289		F09E5.11	0.00438207	0.810494	0.00061825	1.75381
WBGene00044147		M163.11	1	0.810012	0.255619	1.75323
WBGene00013823		Y116F11B.7	0.110017	0.810008	0.0340925	1.75322
WBGene00011133		R08A2.2	0.0955245	0.809997	0.0281648	1.75321
WBGene00002033	htp-2	Y73B6BL.2	0.0196954	0.809822	0.00371621	1.753
WBGene00009693		F44F1.1	0.251967	0.809781	0.106855	1.75294
WBGene00009463		F36D1.4	0.197131	0.809447	0.0758682	1.75254
WBGene00011805		T16G12.4	0.0571104	0.809311	0.014287	1.75237
WBGene00021200	cyp-31A3	Y17G9B.3	0.0443779	0.809151	0.0102706	1.75218
WBGene00007217	tads-1	C01A2.5	0.00259138	0.809073	0.000335629	1.75208
[truncated: 16,339 more rows]

## Sheet: C. sams4.15.37
wormbase_id	geane_name	sequence	padj	log2FoldChange	pvalue	foldChange
WBGene00004622	rrn-3.1	F31C3.9	0	14.4346	0	22143.2
WBGene00002026	hsp-70	C12C8.1	1.22775e-69	10.9195	8.45496e-72	1936.87
WBGene00002016	hsp-16.2	Y46H3A.3	0	9.04346	0	527.657
WBGene00020945	clec-219	W02D7.10	1.34216e-44	7.98569	2.26555e-46	253.474
WBGene00014454		MTCE.7	0	7.5616	0	188.916
WBGene00018097	clec-208	F36F12.6	4.73569e-46	7.06674	7.52787e-48	134.061
WBGene00013927	clec-95	ZK39.2	1.14266e-21	6.74451	5.93429e-23	107.226
WBGene00002114	ins-31	T10D4.4	1.93739e-63	6.51055	1.57495e-65	91.1738
WBGene00018379		F43C11.2	2.63013e-18	6.21052	1.71048e-19	74.0546
WBGene00012618	dct-10	Y38H6C.5	3.04439e-31	6.07962	9.2689e-33	67.6314
WBGene00013930	clec-96	ZK39.5	2.80548e-21	6.0792	1.49767e-22	67.6115
WBGene00219614	linc-105	W09D10.6	5.2329e-13	6.01655	5.13725e-14	64.7384
WBGene00010531		K03D3.5	1.06975e-29	5.95567	3.57266e-31	62.0633
WBGene00045242		C05B5.11	1.16595e-19	5.87357	6.96079e-21	58.63
WBGene00019668	fil-2	K12B6.3	1.5963e-32	5.83669	4.47158e-34	57.1504
WBGene00021041		W05G11.4	2.73659e-14	5.83306	2.41593e-15	57.0069
WBGene00009746		F46A8.3	3.67902e-13	5.72513	3.56796e-14	52.8975
WBGene00009154		F26D2.16	5.04463e-54	5.68602	5.95545e-56	51.4829
WBGene00013928	clec-94	ZK39.3	6.22369e-29	5.65268	2.18811e-30	50.3069
WBGene00017573		F18E9.7	2.39059e-38	5.59774	5.24833e-40	48.4271
WBGene00044450	fipr-18	H14A12.7	1.33618e-17	5.59335	9.08405e-19	48.2797
WBGene00018048	clec-137	F35D11.8	3.34358e-21	5.52996	1.79185e-22	46.2045
WBGene00018096	clec-207	F36F12.5	5.41174e-15	5.52472	4.50301e-16	46.0369
WBGene00015847		C16C8.9	4.91948e-26	5.50284	2.00213e-27	45.344
WBGene00020859	bath-25	T27C10.4	1.39564e-29	5.40006	4.68271e-31	42.226
WBGene00014472		MTCE.33	6.27233e-145	5.35749	1.429e-147	40.9982
WBGene00015655		C09G12.5	2.05101e-18	5.33721	1.32323e-19	40.426
WBGene00004567	rrn-2.1	F31C3.11	4.87089e-82	5.32896	2.64818e-84	40.1956
WBGene00044726		Y53F4B.43	2.21168e-18	5.28046	1.43261e-19	38.8666
WBGene00019684		K12H6.4	3.56905e-31	5.23594	1.09217e-32	37.6855
WBGene00021289		Y25C1A.2	7.53856e-09	5.191	1.11948e-09	36.5298
WBGene00010946		M176.10	1.44233e-28	5.13966	5.15303e-30	35.2526
WBGene00022866		ZK1240.1	3.48956e-22	5.08628	1.76529e-23	33.9722
WBGene00020826		T26A8.3	2.32895e-18	5.0066	1.51099e-19	32.1468
WBGene00003536	nas-17	K03B8.2	1.06628e-17	4.83131	7.19946e-19	28.4688
WBGene00019928	clec-44	R07C3.12	4.37149e-09	4.66361	6.28347e-10	25.3447
WBGene00008231	tag-329	C50F4.3	4.47592e-13	4.65092	4.36862e-14	25.1227
WBGene00008029	scl-7	C39E9.5	4.11405e-08	4.62632	6.78256e-09	24.6979
WBGene00044443		ZC21.10	4.18704e-69	4.61934	2.92678e-71	24.5788
WBGene00017788		F25E5.7	5.30475e-37	4.58548	1.21955e-38	24.0085
WBGene00017791	try-8	F25E5.10	3.31802e-40	4.52548	6.68311e-42	23.0305
WBGene00010885		M7.9	4.81842e-23	4.51069	2.31028e-24	22.7957
WBGene00015821	clec-135	C16A11.8	1.75789e-08	4.47103	2.74337e-09	22.1776
WBGene00023314		H31G24.2	1.25568e-34	4.44472	3.23136e-36	21.7767
WBGene00086567		C05C10.8	5.24832e-09	4.44435	7.62934e-10	21.7713
WBGene00008944		F19B2.5	6.29172e-189	4.3232	9.12174e-192	20.0177
WBGene00021098	fbxb-14	W08F4.9	2.5601e-20	4.31016	1.45549e-21	19.8375
WBGene00008916	clec-221	F17C11.5	7.14117e-53	4.27505	8.87423e-55	19.3606
WBGene00013744		Y111B2A.27	1.03775e-06	4.26241	2.07517e-07	19.1917
WBGene00013887	nspa-5	ZC412.6	4.14109e-32	4.21019	1.18574e-33	18.5095
WBGene00022381	ubxn-2	Y94H6A.9	8.75384e-09	4.19158	1.30947e-09	18.2722
WBGene00008850		F15B9.6	2.83586e-57	4.17974	3.06889e-59	18.1229
WBGene00018324		F42A6.2	0.000245349	4.17701	7.44064e-05	18.0886
WBGene00013933	clec-99	ZK39.8	3.80894e-21	4.17504	2.04913e-22	18.064
WBGene00011855	clec-183	T20D3.1	1.11129e-05	4.14797	2.62732e-06	17.7282
WBGene00019393	irld-45	K04F1.14	4.17427e-05	4.07906	1.08998e-05	16.9013
WBGene00018968		F56D2.8	5.00977e-06	4.05988	1.11703e-06	16.678
WBGene00010578		K04H8.3	1.0777e-12	4.02141	1.08869e-13	16.2392
WBGene00021862	fbxa-48	Y54F10BM.7	3.46534e-23	3.96709	1.64358e-24	15.6391
WBGene00016954		C55C3.4	1.50849e-11	3.9219	1.69259e-12	15.1569
WBGene00015782		C14F11.7	1.53821e-07	3.90212	2.75258e-08	14.9505
WBGene00017106		E02H9.9	1.98381e-17	3.86695	1.36411e-18	14.5905
WBGene00001946	his-72	Y49E10.6	3.58625e-11	3.85288	4.17248e-12	14.4488
WBGene00013559		Y75B8A.28	1.28555e-129	3.8182	3.12851e-132	14.1056
WBGene00011384		T02G6.1	1.46414e-06	3.81014	2.98773e-07	14.027
WBGene00194714		ZC204.17	1.23785e-06	3.79347	2.49921e-07	13.8659
WBGene00018725	kreg-1	F53A9.2	4.21494e-145	3.7826	9.38449e-148	13.7618
WBGene00007569		C14A6.5	0.00100197	3.77774	0.000346772	13.7156
WBGene00189944		E03A3.10	1.4058e-21	3.77634	7.34455e-23	13.7023
WBGene00021457		Y39F10C.1	0.000325057	3.75559	0.00010107	13.5066
WBGene00004903	snf-4	Y46G5A.25	2.40019e-10	3.74094	3.04358e-11	13.3701
WBGene00044358		Y71G12B.33	2.79255e-10	3.69658	3.57437e-11	12.9653
WBGene00010228	clec-161	F58A4.5	1.02628e-07	3.69171	1.79185e-08	12.9215
WBGene00235282		F17E9.18	0.000545233	3.68834	0.000177942	12.8914
WBGene00219695	linc-126	F42A9.16	0.0177559	3.61856	0.00841778	12.2827
WBGene00011385		T02G6.2	9.21741e-11	3.60737	1.12157e-11	12.1879
WBGene00016185		C28F5.4	0.000169949	3.5876	5.0044e-05	12.0219
WBGene00017370		F10G7.6	8.68449e-05	3.58742	2.41428e-05	12.0204
WBGene00019718		M01H9.2	2.71733e-17	3.54249	1.88538e-18	11.6519
WBGene00005748	srw-1	Y75B12B.7	0.00105379	3.51356	0.000366771	11.4205
WBGene00021792		Y52D5A.1	9.08158e-09	3.50928	1.3632e-09	11.3867
WBGene00219601	linc-129	K11D9.9	2.83726e-05	3.48496	7.16917e-06	11.1964
WBGene00000629	col-52	D1007.2	0.00175816	3.48061	0.000642069	11.1627
WBGene00000097	aip-1	F58E10.4	1.99219e-246	3.47075	1.9599e-249	11.0866
WBGene00021599	srt-42	Y46H3A.1	2.54894e-10	3.4614	3.24804e-11	11.0151
WBGene00006429	arrd-3	M176.1	2.13138e-06	3.43696	4.46847e-07	10.83
WBGene00005818	srw-71	F18E3.6	6.17698e-05	3.43406	1.66378e-05	10.8082
WBGene00021380		Y37E11B.9	0.000312358	3.41496	9.68306e-05	10.6661
WBGene00017392	basl-2	F12A10.3	3.14833e-07	3.38649	5.87835e-08	10.4577
WBGene00001237	elc-2	W03H1.2	5.55814e-08	3.3816	9.36477e-09	10.4223
WBGene00020655		T21E12.3	0.0128173	3.38061	0.00583955	10.4151
WBGene00007723		C25F9.2	1.30136e-09	3.3749	1.77082e-10	10.374
WBGene00013049		Y50E8A.6	1.85738e-05	3.36213	4.56145e-06	10.2826
WBGene00022699		ZK353.3	1.04253e-06	3.35447	2.08636e-07	10.2281
WBGene00021623		Y47D7A.11	5.35323e-05	3.35102	1.42527e-05	10.2037
WBGene00013452		Y67A10A.3	9.84095e-12	3.31228	1.08483e-12	9.93335
WBGene00008657	clec-154	F10F2.5	1.17551e-05	3.30276	2.79194e-06	9.86804
WBGene00009465		F36D1.6	2.44194e-05	3.30201	6.11971e-06	9.8629
WBGene00016681		C45G9.10	4.38544e-05	3.30064	1.14898e-05	9.85353
WBGene00219651	linc-130	C14F5.12	6.41717e-05	3.28615	1.73413e-05	9.75503
WBGene00020118		R155.4	0.000287851	3.27144	8.84731e-05	9.65611
WBGene00013076		Y51A2D.8	8.9537e-16	3.23003	6.98197e-17	9.3829
WBGene00018945		F56C3.8	1.95101e-09	3.22857	2.7033e-10	9.37339
WBGene00010072		F54F12.1	4.44922e-11	3.20799	5.22719e-12	9.24065
WBGene00043948		ZC262.7	6.47119e-12	3.19317	7.01635e-13	9.14619
WBGene00219563	linc-95	C32A3.8	6.10778e-35	3.17122	1.54015e-36	9.00808
WBGene00020991		W03D8.10	6.35564e-09	3.16936	9.33946e-10	8.99649
WBGene00010752		K10G4.3	1.13375e-26	3.16142	4.46739e-28	8.94708
WBGene00013047		Y50E8A.2	0.00253964	3.14133	0.0009631	8.82339
WBGene00006689	twk-37	C48E7.9	0.0154438	3.13326	0.00719292	8.77412
WBGene00015028		B0207.5	7.06501e-12	3.10956	7.6858e-13	8.63121
WBGene00017035		D1065.3	2.73011e-06	3.10521	5.81842e-07	8.60524
WBGene00014181		ZK1010.8	8.88251e-48	3.0937	1.32458e-49	8.53683
WBGene00015614		C08G5.1	0.00738395	3.08203	0.00315431	8.46805
WBGene00019257	dhhc-13	H32C10.3	6.0532e-07	3.06453	1.16845e-07	8.36595
WBGene00020318		T07F8.1	1.20032e-08	3.06044	1.83344e-09	8.34229
WBGene00010245		F58D5.6	6.86441e-06	3.05919	1.56567e-06	8.33504
WBGene00008465		E03A3.5	0.000126717	3.04081	3.62836e-05	8.22956
WBGene00017462		F14D2.14	6.07031e-63	3.03101	4.99756e-65	8.17381
WBGene00006416	sams-5	T13A10.11	0.00269472	3.02866	0.00102888	8.16053
WBGene00017808	nspd-9	F26A1.10	7.07659e-08	3.02561	1.20807e-08	8.14331
WBGene00011789		T15H9.4	5.96026e-06	3.00334	1.34617e-06	8.01854
WBGene00197238		T19E7.24	0.00204695	2.99744	0.000758859	7.98581
WBGene00003446	msp-53	R13H9.4	9.40679e-05	2.99263	2.62969e-05	7.95923
WBGene00013995	mboa-5	ZK550.1	0.0218485	2.98728	0.0106069	7.92976
WBGene00219697	linc-169	F43E2.13	9.9169e-06	2.97896	2.32608e-06	7.88418
WBGene00020999		W03F9.1	0	2.97621	0	7.86914
WBGene00006449	alg-4	ZK757.3	1.19082e-05	2.9761	2.8311e-06	7.86857
WBGene00006315	sup-6	F58G1.10	0.0546308	2.96817	0.0300013	7.82543
WBGene00016437		C35B1.8	0.00504888	2.96379	0.00206826	7.80171
WBGene00008870		F15H9.1	2.89827e-05	2.96034	7.32933e-06	7.78308
WBGene00019151	pck-3	H04M03.1	3.7635e-08	2.96015	6.1715e-09	7.78204
WBGene00195257		W01A8.10	0.00445432	2.95545	0.00180059	7.75675
WBGene00009611		F41D3.6	0.0481251	2.95487	0.0259377	7.75361
WBGene00014155		ZK930.5	3.95347e-09	2.95464	5.65806e-10	7.75241
WBGene00015982	bgnt-1.4	C18G1.3	0.00108954	2.94964	0.000380519	7.72558
WBGene00019348		K02H11.4	4.74776e-07	2.94148	9.0417e-08	7.682
WBGene00013591	gcn-2	Y81G3A.3	3.60993e-71	2.923	2.41123e-73	7.58422
WBGene00009489		F36G9.13	3.16307e-06	2.91555	6.82304e-07	7.54513
WBGene00010791	sodh-2	K12G11.4	0.000778895	2.91031	0.000262872	7.51782
WBGene00021302		Y32G9A.3	0.012125	2.90346	0.00548644	7.4822
WBGene00006624	try-6	F48A9.3	2.13581e-16	2.88804	1.58695e-17	7.40264
WBGene00013705		Y106G6E.1	0.00151517	2.88599	0.000545093	7.39214
WBGene00007998		C38C6.5	0.000139808	2.88081	4.03941e-05	7.36566
WBGene00005138	srd-61	C01B4.5	0.020535	2.87707	0.00988842	7.34656
WBGene00044099	srd-75	Y19D10A.15	0.020535	2.87707	0.00988842	7.34656
WBGene00219683	anr-32	F29G9.18	1.7438e-07	2.86811	3.15387e-08	7.3011
WBGene00006053	ssq-4	T28H11.1	0.000165685	2.86611	4.86082e-05	7.29094
WBGene00007117	spe-42	B0240.2	2.31892e-06	2.85851	4.89047e-07	7.25268
WBGene00013478		Y69E1A.8	1.04239e-10	2.84417	1.27486e-11	7.18092
WBGene00045508		D1081.10	0.00059177	2.84372	0.000194601	7.17869
WBGene00018530		F47B3.6	8.44426e-08	2.84295	1.45581e-08	7.17484
WBGene00008801	acp-3	F14E5.3	3.27401e-08	2.83437	5.31626e-09	7.13233
WBGene00016491	acdh-5	C37A2.3	8.58322e-09	2.82981	1.28262e-09	7.10979
WBGene00010147		F56D5.2	4.25826e-08	2.82957	7.03794e-09	7.10864
WBGene00020914	sulp-6	W01B11.2	3.9325e-12	2.82906	4.18438e-13	7.10611
WBGene00021733	otub-2	Y50C1A.1	6.90296e-116	2.82318	1.9301e-118	7.07721
WBGene00018502		F46F5.11	0.000124094	2.8174	3.54876e-05	7.0489
WBGene00022622		ZC477.10	0.00104565	2.81549	0.000363511	7.03958
WBGene00219615	linc-109	W09D10.7	2.04255e-10	2.81073	2.57209e-11	7.01642
WBGene00013006	lin-38	Y48E1B.7	9.88119e-104	2.80998	3.68376e-106	7.01273
WBGene00003448	msp-55	C09B9.6	0.000698667	2.80916	0.000233624	7.00878
WBGene00001828	hch-1	F40E10.1	0.000110133	2.80662	3.11357e-05	6.99643
WBGene00020117		R155.3	2.94926e-06	2.8002	6.3313e-07	6.96536
WBGene00045168		B0285.12	0.0343755	2.80004	0.0176995	6.96459
WBGene00008487		F01D4.3	0.000264398	2.79337	8.07171e-05	6.93247
WBGene00013495	clec-236	Y70C5C.5	0.000106651	2.78285	3.01016e-05	6.88211
WBGene00015331		C02B10.6	5.079e-08	2.77766	8.48385e-09	6.8574
WBGene00019157		H05C05.1	5.36353e-10	2.76059	7.03733e-11	6.77675
WBGene00018308		F41G4.4	2.89904e-05	2.7597	7.33535e-06	6.77256
WBGene00005651	srp-10	F09C6.4	0.00681486	2.75853	0.00288483	6.76705
WBGene00010877	lact-4	M05D6.4	1.08747e-70	2.75749	7.3763e-73	6.76218
WBGene00012594	nspe-5	Y38E10A.16	1.03451e-10	2.75749	1.26361e-11	6.76218
WBGene00021476	nsun-4	Y39G10AR.21	6.20583e-08	2.75614	1.05171e-08	6.75587
WBGene00006051	ssq-2	T28H11.5	0.000984283	2.75173	0.000339833	6.73522
WBGene00014005		ZK593.9	2.84851e-09	2.73399	4.01875e-10	6.65294
WBGene00010931		M162.5	2.27033e-26	2.73382	9.06346e-28	6.65215
WBGene00018495		F46F5.4	0.0092066	2.72215	0.0040334	6.59854
WBGene00013170		Y53F4B.24	3.86209e-06	2.71833	8.44689e-07	6.58112
WBGene00013735		Y111B2A.12	3.10306e-223	2.70828	3.37411e-226	6.53543
WBGene00009268		F30A10.11	0.000270417	2.70632	8.26948e-05	6.52654
WBGene00022007	mpst-6	Y59H11AM.3	5.97965e-06	2.68858	1.35117e-06	6.44679
WBGene00194653		F36H2.6	0.00523633	2.68375	0.00215575	6.42525
WBGene00195010		Y37E11AL.12	0.0252728	2.68195	0.012501	6.41723
WBGene00016516		C38C3.8	0.0216408	2.68095	0.0104926	6.41277
WBGene00018980		F56F4.3	5.47972e-05	2.67958	1.46179e-05	6.4067
WBGene00014755		F40F12.8	0.000840676	2.67645	0.000285812	6.39279
WBGene00011176		R09E10.6	0.000326967	2.67482	0.000101763	6.38559
WBGene00077549		F11A6.3	0.00241039	2.66499	0.000908353	6.34223
WBGene00015630		C09B9.7	6.84497e-07	2.65793	1.33192e-07	6.31128
WBGene00018158	comp-1	F37E3.3	4.69593e-06	2.65402	1.04092e-06	6.29418
WBGene00008724		F13A7.1	1.03756e-09	2.64853	1.39412e-10	6.2703
WBGene00021265		Y22D7AR.12	8.0029e-06	2.63913	1.84937e-06	6.22955
WBGene00012294	nspa-8	W06A7.5	1.98186e-12	2.63824	2.0421e-13	6.2257
WBGene00013070		Y51A2B.6	0.00632474	2.63496	0.00266148	6.21158
WBGene00015421		C04E6.4	9.70169e-05	2.63137	2.71816e-05	6.19614
WBGene00021016		W03G9.5	0.000256292	2.62327	7.80302e-05	6.16147
WBGene00014157		ZK930.7	2.3698e-05	2.62298	5.91684e-06	6.16021
WBGene00003466	msp-79	T13F2.10	7.0661e-05	2.62091	1.92925e-05	6.15138
WBGene00007631	wht-3	C16C10.12	1.0747e-05	2.62058	2.53525e-06	6.14996
WBGene00011466		T05C12.1	3.80722e-12	2.61991	4.04319e-13	6.14713
WBGene00016250	hsp-110	C30C11.4	6.26869e-286	2.61939	5.51793e-289	6.14491
WBGene00219701	anr-34	F54F2.12	5.68498e-10	2.61612	7.47969e-11	6.13098
WBGene00003906	paf-1	W03G9.6	3.15457e-05	2.60448	8.04609e-06	6.08173
WBGene00007792		C28D4.4	0.000508861	2.60382	0.000164992	6.07893
WBGene00012679		Y39B6A.18	0.000100046	2.60249	2.81236e-05	6.07336
WBGene00008871	tag-314	F15H10.4	1.13881e-05	2.60208	2.69652e-06	6.0716
WBGene00044475		F56D6.13	2.98001e-05	2.60205	7.55808e-06	6.07148
WBGene00019338		K02F6.4	0.167339	2.59867	0.109468	6.05726
WBGene00022071		Y67D8C.7	0.0303001	2.59816	0.0153501	6.05512
WBGene00000659	col-84	K12D12.3	0.00247026	2.59812	0.000933591	6.05497
WBGene00000771	cpb-2	C30B5.3	7.0843e-07	2.59656	1.38106e-07	6.04842
WBGene00016956		C55C3.6	5.54707e-05	2.59442	1.48176e-05	6.03946
WBGene00014967		Y113G7A.2	0.12888	2.59419	0.0805661	6.03849
WBGene00000562	cng-1	F14H8.6	0.000257219	2.58597	7.83392e-05	6.00417
WBGene00020021		R12B2.7	0.0770355	2.57797	0.0445309	5.97101
WBGene00015615	fbxc-48	C08G5.2	0.000421812	2.57688	0.000134518	5.96646
WBGene00012307		W06F12.3	5.9894e-07	2.57549	1.15459e-07	5.96074
WBGene00018309		F41G4.5	2.2459e-06	2.57124	4.72601e-07	5.94319
WBGene00011617		T08G3.4	5.19453e-05	2.57012	1.37845e-05	5.93857
WBGene00007553		C13G3.1	1.3264e-28	2.56735	4.732e-30	5.92718
WBGene00021993		Y59E9AL.3	0.000196061	2.55814	5.83015e-05	5.88949
WBGene00005602	srj-14	C03G6.3	2.83015e-24	2.55676	1.27051e-25	5.88385
WBGene00006038	ssp-9	E03H12.10	0.00048558	2.55514	0.000156991	5.87725
WBGene00019461		K07A3.3	5.67134e-08	2.55339	9.56431e-09	5.87012
WBGene00021632		Y47D9A.5	0.00373151	2.54859	0.00147672	5.85064
WBGene00010761		K10H10.5	0.0922304	2.54757	0.0545894	5.84647
WBGene00021386		Y37F4.5	1.70124e-06	2.54718	3.50854e-07	5.8449
WBGene00020042		R13A1.3	0.00090235	2.54703	0.000308929	5.84429
WBGene00019229	ipla-5	H23L24.2	9.92381e-06	2.54542	2.32873e-06	5.83779
WBGene00010092		F55C5.2	8.1951e-07	2.54303	1.61284e-07	5.82811
WBGene00009956		F53B2.5	1.28243e-10	2.54296	1.58237e-11	5.82783
WBGene00008556		F07D3.3	0.000183108	2.53712	5.42128e-05	5.8043
WBGene00009471		F36D3.5	3.09736e-10	2.53487	3.98696e-11	5.79525
WBGene00007084		AH10.3	0.000112584	2.52875	3.18871e-05	5.77072
WBGene00009114		F25D7.5	0.00691843	2.52637	0.00293352	5.76121
WBGene00010244		F58D5.5	1.87774e-63	2.52609	1.51673e-65	5.76009
WBGene00017902		F28E10.4	4.29024e-05	2.52588	1.12182e-05	5.75924
WBGene00012620		Y38H6C.7	0.0156618	2.52441	0.00730417	5.75338
WBGene00008423		D2045.5	2.64736e-06	2.52437	5.63247e-07	5.75323
WBGene00013290		Y57G11A.2	0.00252963	2.5234	0.000958911	5.74936
WBGene00013175		Y53F4B.36	0.00139399	2.52201	0.000498177	5.74382
WBGene00013749		Y113G7A.12	0.0166145	2.51716	0.00782078	5.72456
WBGene00019072	fbxc-8	F58H7.7	2.70874e-05	2.51546	6.81778e-06	5.71781
WBGene00009592		F40F12.3	3.70001e-07	2.51431	6.95631e-08	5.71324
WBGene00019169		H06I04.5	7.30839e-07	2.51425	1.42702e-07	5.713
WBGene00016541		C39H7.1	0.00129297	2.51105	0.000459467	5.70034
WBGene00013043	arrd-16	Y49E10.24	4.72578e-06	2.51016	1.049e-06	5.69685
WBGene00008282		C53D6.5	0.0138614	2.50703	0.00637051	5.68448
WBGene00004909	snf-10	Y32F6A.2	7.66713e-07	2.50436	1.50063e-07	5.67396
WBGene00200098		Y71F9AL.20	0.0413069	2.50326	0.0217967	5.66964
WBGene00014127		ZK892.3	0.00010109	2.49317	2.84327e-05	5.63012
WBGene00045180		K07F5.17	0.0147089	2.49293	0.00681613	5.62919
WBGene00007795		C28D4.8	5.37946e-05	2.4915	1.43337e-05	5.62363
WBGene00050912		F43E2.12	6.10798e-05	2.49134	1.64362e-05	5.623
WBGene00020533		T16A1.2	0.000550387	2.49083	0.000179767	5.62102
WBGene00019950	clec-175	R08C7.6	0.000301754	2.48698	9.32306e-05	5.60604
WBGene00010883		M7.7	1.02038e-05	2.48642	2.39971e-06	5.60385
WBGene00017942	fbxc-37	F31A9.4	7.36118e-08	2.48598	1.25857e-08	5.60216
WBGene00017179	wht-4	F02E11.1	1.90699e-06	2.48494	3.96644e-07	5.59813
WBGene00010933		M162.7	5.5088e-05	2.48483	1.4708e-05	5.59768
WBGene00013374		Y62E10A.3	0.00143873	2.48239	0.000515734	5.58821
WBGene00018134		F37A4.4	5.60932e-08	2.47922	9.45682e-09	5.57596
WBGene00007613		C15H11.1	1.35375e-05	2.47869	3.24471e-06	5.5739
WBGene00019783		M70.1	2.98053e-07	2.47675	5.54191e-08	5.56642
WBGene00002212	kin-31	B0523.1	1.48118e-08	2.47291	2.28777e-09	5.55163
WBGene00014201		ZK1053.6	0.000199068	2.47259	5.92988e-05	5.55041
WBGene00016800		C50C3.2	2.95915e-11	2.46858	3.40456e-12	5.53498
WBGene00021256		Y22D7AR.2	6.35414e-24	2.46043	2.90843e-25	5.50379
WBGene00009030	clec-233	F21H7.4	1.65578e-10	2.45944	2.06223e-11	5.50002
WBGene00015366		C03A7.2	7.90584e-06	2.45923	1.82531e-06	5.49922
WBGene00000082	adt-1	C02B4.1	6.16591e-18	2.45886	4.09294e-19	5.49783
WBGene00017559	mpz-3	F18C5.4	2.94583e-09	2.45834	4.16289e-10	5.49584
WBGene00007641		C17E4.1	8.88748e-05	2.45737	2.47716e-05	5.49214
WBGene00008153		C47E12.10	8.64527e-06	2.45722	2.00722e-06	5.49157
WBGene00012925	wht-8	Y47D3A.11	9.638e-07	2.45464	1.91732e-07	5.48176
WBGene00010381		H12D21.5	0.00141136	2.44941	0.00050475	5.46191
WBGene00010265		F58G1.3	1.81601e-08	2.44909	2.83972e-09	5.46071
WBGene00194869		K01A6.8	0.0266134	2.44771	0.0132688	5.4555
WBGene00017619		F20A1.8	0.0256115	2.4474	0.0126863	5.45433
WBGene00195159		T04C12.14	0.0304436	2.43903	0.0154417	5.42277
WBGene00001554	gcy-34	M04G12.3	1.90045e-05	2.43684	4.67019e-06	5.41455
WBGene00001839	hdl-1	ZK829.2	7.65088e-10	2.43571	1.01653e-10	5.41031
WBGene00020890	fbxa-202	T28C12.3	0.000582634	2.42835	0.000191062	5.38276
WBGene00016839		C50F2.5	1.54266e-05	2.42775	3.73664e-06	5.38053
WBGene00022090		Y69A2AR.19	0.00146045	2.42162	0.000524197	5.35772
WBGene00012547		Y37D8A.5	2.938e-08	2.41919	4.74327e-09	5.3487
WBGene00012180		W01D2.3	1.13421e-27	2.41795	4.24013e-29	5.3441
WBGene00044462		C44B12.9	0.0107979	2.41775	0.00481498	5.34339
WBGene00016398		C34D4.2	2.12033e-07	2.4154	3.88099e-08	5.33467
WBGene00007778		C27D8.2	0.000789493	2.41451	0.000266775	5.33138
WBGene00011132		R08A2.1	0.000432821	2.41348	0.000138365	5.32757
WBGene00012549		Y37D8A.8	0.00767428	2.41176	0.00329057	5.32122
WBGene00013473		Y69E1A.1	0.00255299	2.40683	0.000968556	5.30309
WBGene00045094		D1007.20	0.120439	2.40499	0.074572	5.29633
WBGene00010679		K08F4.5	2.77941e-08	2.39894	4.4714e-09	5.27416
WBGene00000021	abt-3	F55G11.9	0.000332057	2.39643	0.000103453	5.26498
WBGene00012690		Y39B6A.31	2.3201e-06	2.39367	4.89416e-07	5.25493
WBGene00017975		F32B5.1	0.000130049	2.3933	3.73655e-05	5.25357
WBGene00018993	nhr-266	F56H1.2	0.00445354	2.39226	0.00180005	5.24978
WBGene00015386		C03B8.3	8.85162e-08	2.38765	1.53172e-08	5.23304
WBGene00009755		F46A9.2	5.4847e-05	2.37901	1.4634e-05	5.2018
WBGene00009705		F44F4.10	0.000616796	2.37863	0.000203725	5.20041
WBGene00015305		C01G5.3	0.000422352	2.37609	0.000134712	5.19129
WBGene00004965	spe-11	F48C1.7	2.81697e-08	2.37573	4.53825e-09	5.18999
WBGene00009685		F44D12.8	2.34315e-05	2.37436	5.8406e-06	5.18504
WBGene00020715	nspd-4	T23B7.1	1.28893e-07	2.37293	2.27313e-08	5.17991
WBGene00007512		C10C6.3	2.5299e-06	2.37153	5.36422e-07	5.17491
WBGene00021652		Y47G6A.29	1.23654e-38	2.36496	2.68911e-40	5.15138
WBGene00219656	anr-48	C33C12.13	0.0153919	2.35192	0.00716158	5.10505
WBGene00012689		Y39B6A.30	6.87565e-07	2.34296	1.3386e-07	5.07341
WBGene00022659		ZK112.3	1.0591e-06	2.34248	2.12171e-07	5.07172
WBGene00009313		F32B4.2	2.948e-06	2.34	6.32706e-07	5.06303
WBGene00020187	gsp-4	T03F1.5	0.00263814	2.33499	0.00100482	5.04547
WBGene00016949		C55C2.3	0.0166699	2.3347	0.00784941	5.04445
WBGene00011737	sqst-1	T12G3.1	1.89701e-216	2.33376	2.16093e-219	5.04116
WBGene00012638		Y38H8A.4	2.6812e-06	2.3333	5.70585e-07	5.03956
WBGene00219607	anr-7	T19B10.18	0.0549505	2.33196	0.0302195	5.0349
WBGene00018148		F37C4.8	0.0079326	2.33103	0.00341324	5.03163
WBGene00016763		C49A9.9	3.26212e-05	2.33079	8.339e-06	5.0308
WBGene00219686	linc-125	F32A5.10	0.000189583	2.32724	5.6238e-05	5.01845
WBGene00007715		C25D7.2	0.0201923	2.3269	0.00970566	5.01726
WBGene00008950	wht-5	F19B6.4	6.12864e-09	2.32482	8.98685e-10	5.01003
WBGene00013802		Y116A8C.25	2.47672e-09	2.32073	3.4638e-10	4.99584
WBGene00015688		C10G11.8	0.00305855	2.31898	0.00118538	4.98981
WBGene00021601		Y46H3A.5	0.0317289	2.31873	0.016179	4.98892
WBGene00019425		K06A1.2	9.48785e-05	2.31685	2.65383e-05	4.98242
WBGene00020992		W03F8.2	9.45635e-14	2.31242	8.68615e-15	4.96715
WBGene00004904	snf-5	Y46G5A.30	0.000876071	2.31197	0.000299342	4.96561
WBGene00002193	kin-5	T13H10.1	4.05124e-07	2.31189	7.64393e-08	4.96532
WBGene00019810		R01H2.2	8.85568e-06	2.31126	2.06111e-06	4.96315
WBGene00009884		F49C12.15	0.000405073	2.3111	0.000128697	4.96261
WBGene00004512	rrn-1.1	F31C3.7	4.64333e-58	2.31052	4.83254e-60	4.96061
WBGene00008529		F02E9.3	2.50968e-06	2.30957	5.31616e-07	4.95737
WBGene00015628	best-6	C09B9.3	0.000781161	2.30683	0.000263798	4.94794
WBGene00018410		F44B9.9	0.0160712	2.30523	0.00753175	4.94247
WBGene00013085	mpz-6	Y51B9A.3	0.00145577	2.30352	0.000522141	4.93661
WBGene00007611		C15H7.4	0.000137896	2.30338	3.97866e-05	4.93612
WBGene00013186		Y53H1C.3	0.000146901	2.30261	4.26563e-05	4.93349
WBGene00010167	bgnt-1.6	F56H6.6	0.0108497	2.30229	0.00484202	4.93241
WBGene00019024		F58A6.5	6.90768e-05	2.29758	1.88242e-05	4.91633
WBGene00008230	pfk-1.2	C50F4.2	5.33596e-05	2.29725	1.42012e-05	4.91519
WBGene00016212		C29F5.3	1.5349e-05	2.29609	3.71544e-06	4.91124
WBGene00200154		F37B12.11	0.116415	2.29478	0.0716222	4.90678
WBGene00019586		K09F6.3	4.09386e-08	2.29422	6.74628e-09	4.90489
WBGene00010366		H05L14.1	0.00350832	2.29317	0.0013804	4.90133
WBGene00007156		B0379.2	0.000606528	2.293	0.000200114	4.90074
WBGene00010510	ent-3	K02E11.1	4.4781e-09	2.29289	6.45757e-10	4.90036
WBGene00020985		W03D8.2	7.84975e-06	2.28966	1.80976e-06	4.88941
WBGene00007632		C16C10.13	0.00255108	2.28894	0.000967701	4.88697
WBGene00016058	nspd-3	C24D10.7	0.0101188	2.28742	0.00448124	4.88181
WBGene00004907	snf-8	ZK829.10	0.00478508	2.28386	0.00194917	4.86978
WBGene00019561		K09C6.7	2.12937e-06	2.28209	4.45984e-07	4.86383
WBGene00077551		H15N14.3	0.154534	2.28028	0.0995795	4.85773
WBGene00201165		Y110A7A.23	0.160174	2.27918	0.103894	4.85401
WBGene00001944	his-70	E03A3.4	0.000714917	2.27879	0.000239688	4.85269
WBGene00199661		C16B8.8	0.166262	2.27816	0.108626	4.8506
WBGene00008074	nkb-2	C43F9.6	7.54272e-06	2.27814	1.73405e-06	4.85052
WBGene00012320	srxa-3	W07A8.4	0.0449891	2.27633	0.0240355	4.84445
WBGene00017554	nep-9	F18A12.5	0.000375922	2.27616	0.000118696	4.84386
WBGene00015193	clec-117	B0432.12	0.00126354	2.26734	0.000448157	4.81434
WBGene00012769		Y41E3.11	0.000201272	2.26707	6.00387e-05	4.81345
WBGene00002186	kel-10	T16H12.6	0.00485295	2.2615	0.00197907	4.7949
WBGene00009043		F22B5.5	3.30346e-05	2.25681	8.45834e-06	4.77934
WBGene00013651		Y105C5B.11	8.58764e-05	2.24534	2.38425e-05	4.74148
WBGene00016339		C33C12.7	0.000833827	2.24145	0.000283224	4.72872
WBGene00009255	ugt-34	F29F11.2	0.0245026	2.23853	0.0120552	4.71916
WBGene00015032		B0207.9	0.00313462	2.23645	0.00121746	4.71235
WBGene00011369		T02C12.4	0.00978506	2.23387	0.00431535	4.70394
WBGene00010920		M117.4	4.36039e-08	2.2318	7.21577e-09	4.69721
WBGene00015094		B0261.6	0.0153932	2.23075	0.00716296	4.69377
WBGene00021382		Y37F4.1	3.50243e-08	2.22803	5.71476e-09	4.68493
WBGene00010300		F59A1.15	0.00330803	2.22664	0.00129372	4.68043
WBGene00005299	srh-78	DC2.2	0.160669	2.22424	0.10424	4.67265
WBGene00004964	spe-10	AC3.10	1.74195e-05	2.22099	4.25363e-06	4.66212
WBGene00001080	dpy-21	Y59A8B.1	2.08693e-51	2.21921	2.73387e-53	4.65639
WBGene00014852		W02A11.6	1.8537e-09	2.21716	2.56176e-10	4.64977
WBGene00016742		C48B6.4	6.50162e-06	2.21358	1.47753e-06	4.63824
WBGene00009501		F37A8.1	0.00441941	2.21274	0.00178488	4.63554
WBGene00018840		F54H5.3	2.31653e-08	2.20466	3.68597e-09	4.60966
WBGene00008508		F01G10.5	2.56329e-06	2.20326	5.44166e-07	4.60517
WBGene00008383		D1081.5	0.000128141	2.20179	3.67444e-05	4.60048
WBGene00219444		Y41E3.461	0.044142	2.19978	0.0235167	4.59409
WBGene00007794		C28D4.7	0.0282761	2.19779	0.0142135	4.58777
WBGene00018225	nep-14	F40B5.1	6.26081e-07	2.19724	1.21209e-07	4.58601
WBGene00018127		F36H12.14	0.00132273	2.1919	0.000471181	4.56907
WBGene00013809		Y116A8C.33	1.26003e-16	2.18892	9.1666e-18	4.55966
WBGene00000636	col-60	F22D6.10	0.00643376	2.1883	0.00270969	4.5577
WBGene00009039		F22B3.8	0.00293736	2.18653	0.001134	4.55211
WBGene00023490		F36A2.14	8.44996e-08	2.18628	1.4574e-08	4.5513
WBGene00022596		ZC395.4	1.44932e-05	2.18607	3.49028e-06	4.55064
WBGene00004972	spe-26	R10H10.2	1.89268e-08	2.18327	2.9712e-09	4.54183
WBGene00009846		F48F5.2	3.29532e-06	2.18232	7.12368e-07	4.53882
WBGene00015106		B0280.11	0.000296951	2.18039	9.15932e-05	4.53276
WBGene00020293	nep-20	T06D4.4	0.000964449	2.17653	0.000332087	4.52065
WBGene00015661		C09H5.7	0.021545	2.17547	0.0104418	4.51733
WBGene00001603	gln-2	K03H1.1	0.00404066	2.16548	0.0016135	4.48616
WBGene00011378		T02E1.6	4.8675e-05	2.1639	1.28688e-05	4.48125
WBGene00015855		C16C8.18	0.000677197	2.16318	0.000225764	4.47902
WBGene00014048		ZK666.8	0.000120091	2.16111	3.42246e-05	4.47259
WBGene00009099		F25B3.2	0.00521417	2.15877	0.00214447	4.46534
WBGene00023517	srz-75	Y7A9C.9	0.242654	2.15858	0.169919	4.46475
WBGene00015937		C17H12.12	0.00196661	2.15629	0.000726137	4.45768
WBGene00219326		F36D3.16	6.63174e-05	2.15458	1.79864e-05	4.45241
WBGene00007888	ttr-9	C33A12.15	0.00406755	2.15083	0.00162529	4.44084
WBGene00021809		Y53G8AR.1	0.0365234	2.14925	0.0189605	4.43597
WBGene00018563		F47D12.7	4.65255e-06	2.14688	1.03058e-06	4.42869
WBGene00020725	cnp-3	T23C6.3	1.13834e-90	2.14658	5.12792e-93	4.42778
WBGene00020707	wago-10	T22H9.3	4.20604e-08	2.14587	6.9451e-09	4.4256
WBGene00016327		C32E12.1	6.86215e-05	2.14308	1.86966e-05	4.41704
WBGene00007307	spch-1	C04G2.8	0.00266242	2.14201	0.00101545	4.41376
WBGene00002120	ins-37	F08G2.6	0.0108798	2.14095	0.00485711	4.41051
WBGene00012036	clec-103	T26E3.1	0.147174	2.13964	0.0941218	4.40653
WBGene00018196	nep-13	F39E9.4	0.000157291	2.13798	4.59663e-05	4.40146
WBGene00018792		F54C1.8	1.21284e-05	2.13797	2.885e-06	4.40143
WBGene00018709	srsx-8	F52F10.5	0.130165	2.1377	0.0814854	4.4006
WBGene00020140	ant-1.4	T01B11.4	1.08964e-05	2.13738	2.57389e-06	4.39964
WBGene00009416		F35E2.9	2.59169e-08	2.1351	4.14928e-09	4.39269
WBGene00022617		ZC477.2	0.000393074	2.13395	0.000124661	4.38918
WBGene00018168	irld-7	F38A5.11	0.0205504	2.1339	0.009898	4.38902
WBGene00003605	nhr-6	C48D5.1	2.15225e-21	2.13342	1.14226e-22	4.38756
WBGene00044741		Y57G11C.52	0.00433926	2.13256	0.00174757	4.38494
WBGene00019748	atg-2	M03A8.2	8.8478e-92	2.13172	3.84827e-94	4.38238
WBGene00007081		AH6.3	6.94811e-05	2.1292	1.89487e-05	4.37473
WBGene00020772		T24E12.2	0.071787	2.12903	0.0410472	4.37423
WBGene00017138		EEED8.10	2.50156e-63	2.12431	2.04653e-65	4.35994
WBGene00009217	spe-45	F28D1.8	0.00221678	2.12201	0.000827808	4.35299
WBGene00000396	cdh-4	F25F2.2	4.85349e-35	2.12162	1.22135e-36	4.35183
WBGene00010241		F58D2.2	0.00539227	2.12071	0.00222609	4.34908
WBGene00206371		F28B12.6	0.00104842	2.12009	0.000364527	4.3472
WBGene00018082		F36A4.3	0.00497943	2.11668	0.00203658	4.33695
WBGene00018580		F47G6.3	0.00050107	2.11637	0.000162258	4.336
WBGene00012223		W03C9.8	0.00781714	2.11599	0.00335628	4.33489
WBGene00014089		ZK822.1	9.69143e-15	2.11581	8.24471e-16	4.33432
WBGene00003970	pek-1	F46C3.1	1.85523e-158	2.11409	3.74638e-161	4.32917
WBGene00018336		F42A9.7	0.000138229	2.11228	3.9902e-05	4.32374
WBGene00015467	basl-1	C05D2.3	4.70872e-05	2.11186	1.24124e-05	4.32248
WBGene00021398		Y38C1AA.7	0.0136288	2.11156	0.00625514	4.32159
WBGene00015597	fbxa-162	C08E3.5	0.026559	2.11055	0.0132348	4.31856
WBGene00016825		C50E10.1	0.0083491	2.11047	0.00361511	4.31832
WBGene00012595		Y38E10A.17	0.0079369	2.10892	0.00341591	4.31368
WBGene00008541		F07A5.2	0.00671687	2.10873	0.0028411	4.31311
WBGene00009959		F53B6.4	0.00328058	2.10739	0.00128196	4.30912
WBGene00018124		F36H12.10	9.77718e-05	2.10722	2.74032e-05	4.30859
WBGene00012607		Y38F1A.4	0.000166201	2.10351	4.87767e-05	4.29753
WBGene00019568		K09D9.11	0.000194663	2.102	5.78658e-05	4.29303
WBGene00012600		Y38E10A.22	8.19589e-206	2.1004	1.10337e-208	4.28829
WBGene00019430		K06A5.2	0.0111463	2.09538	0.00499109	4.2734
WBGene00004084	pph-2	C29E6.3	0.000528702	2.09313	0.000172082	4.26673
WBGene00013476		Y69E1A.4	0.00167944	2.08878	0.000609715	4.25387
WBGene00003460	msp-71	F59A6.8	5.8219e-05	2.08754	1.56241e-05	4.25023
WBGene00007323	fbxa-155	C05B5.6	0.00728071	2.08746	0.00310635	4.25
WBGene00022094		Y69A2AR.23	0.00271958	2.08733	0.0010395	4.24961
WBGene00011401		T03F6.6	0.0126489	2.08669	0.00575758	4.24772
WBGene00003464	msp-77	F32B6.6	0.0076211	2.08543	0.00326618	4.24402
WBGene00016605		C43E11.5	3.00984e-11	2.08475	3.46756e-12	4.24202
WBGene00021214	hasp-2	Y18H1A.10	7.39445e-06	2.08445	1.69768e-06	4.24114
WBGene00022754	nspd-1	ZK484.8	0.0098587	2.0835	0.00435175	4.23834
WBGene00013121	spe-38	Y52B11A.1	0.03479	2.08336	0.017959	4.23792
WBGene00006820	unc-89	C09D1.1	8.39792e-38	2.08083	1.87413e-39	4.23051
WBGene00018314		F41H10.1	0.00129738	2.07517	0.0004611	4.21394
WBGene00219636	linc-81	Y116F11B.26	0.000102363	2.07357	2.88226e-05	4.20926
WBGene00006057	sss-2	F47B8.11	0.00434134	2.07315	0.00174953	4.20804
WBGene00022375		Y94H6A.2	0.00548747	2.07222	0.00226948	4.20534
WBGene00017213		F07E5.8	0.0023223	2.07203	0.000871901	4.20479
WBGene00018471		F45E4.6	7.99229e-05	2.07098	2.20695e-05	4.20173
WBGene00021117	clec-126	W09G10.5	0.000426587	2.06911	0.000136195	4.19629
WBGene00020903	acd-5	T28F2.7	2.6366e-49	2.06903	3.74064e-51	4.19604
WBGene00021479	oac-55	Y39H10A.2	0.000274094	2.06678	8.39184e-05	4.18951
WBGene00016843		C50F7.3	0.000973363	2.0661	0.00033566	4.18752
WBGene00003434	msp-38	K08F4.8	0.0211094	2.06575	0.0102033	4.18652
WBGene00019507		K07H8.7	0.000326586	2.06502	0.000101613	4.18439
WBGene00050899		T10C6.15	0.00386141	2.06454	0.00153333	4.18301
WBGene00007735		C25G4.8	0.000632134	2.05901	0.000209282	4.167
WBGene00021273		Y23H5B.2	0.0491251	2.05489	0.0265476	4.15512
WBGene00012011		T25B9.5	2.20196e-05	2.05487	5.46813e-06	4.15505
WBGene00008347		C56G7.2	0.000489983	2.05484	0.00015844	4.15497
WBGene00017175	irld-3	F02C9.4	0.000610403	2.04953	0.000201487	4.13971
WBGene00009548		F38H4.4	7.95306e-05	2.04316	2.19365e-05	4.12146
WBGene00044018		T04B2.8	0.0936404	2.03795	0.0555258	4.10661
WBGene00004901	snf-2	F55H12.1	1.53482e-06	2.03672	3.14624e-07	4.10312
WBGene00011120		R07E5.15	3.60584e-05	2.03568	9.30726e-06	4.10017
WBGene00010485	ant-1.3	K01H12.2	0.0038152	2.0347	0.0015134	4.09737
WBGene00021367		Y37E11AM.3	9.20357e-24	2.03397	4.25081e-25	4.09529
WBGene00006106	str-41	R13D7.1	0.0561349	2.03388	0.0309551	4.09504
WBGene00235369		K08D10.18	0.00221259	2.03366	0.000826013	4.09443
WBGene00007572		C14A6.8	0.161867	2.03283	0.105143	4.09206
WBGene00015241		B0524.2	0.0148913	2.03193	0.00691095	4.08951
WBGene00018898		F55F10.1	4.16552e-59	2.03029	4.18428e-61	4.08488
WBGene00001650	gon-1	F25H8.3	5.45476e-30	2.02703	1.7822e-31	4.07564
WBGene00008272		C53B4.2	5.76089e-05	2.02315	1.54336e-05	4.06471
WBGene00011171		R09E10.1	6.58434e-11	2.023	7.8618e-12	4.06427
WBGene00003470	msp-152	ZK546.6	0.0185836	2.02253	0.0088633	4.06295
WBGene00013337		Y57G11C.48	0.021706	2.02185	0.0105265	4.06105
WBGene00019768		M04F3.2	8.31088e-16	2.02058	6.4678e-17	4.05746
WBGene00003415	mars-1	F58B3.5	1.85709e-10	2.02029	2.32509e-11	4.05666
WBGene00014375		F44D12.11	0.0236747	2.01595	0.0115866	4.04447
WBGene00003443	msp-50	C34F11.4	0.00465597	2.01469	0.00189223	4.04095
WBGene00007740		C26C6.6	0.0809373	2.01293	0.0470336	4.03602
WBGene00013167		Y53F4B.21	2.33914e-51	2.01161	3.0885e-53	4.03233
WBGene00018895		F55F8.7	0.000387795	2.0099	0.000122806	4.02753
WBGene00009079		F23B12.1	0.000698763	2.00927	0.000233693	4.02579
WBGene00013053		Y50E8A.10	0.00118375	2.00816	0.000417037	4.02269
WBGene00012402	sfxn-1.3	Y6E2A.9	0.00202194	2.00815	0.000748974	4.02267
WBGene00020289		T06C10.3	0.000161827	2.0049	4.73479e-05	4.0136
WBGene00015370		C03A7.12	1.93481e-08	2.00399	3.04552e-09	4.01108
WBGene00006759	unc-22	ZK617.1	5.65423e-28	2.0024	2.08158e-29	4.00665
WBGene00019468		K07B1.8	2.35107e-34	2.00155	6.13545e-36	4.00429
WBGene00044333		C01G12.13	0.00228847	2.00035	0.000857816	4.00098
WBGene00043147	nspd-6	C24D10.8	3.91081e-05	1.99964	1.01572e-05	3.999
WBGene00020987		W03D8.5	1.91433e-05	1.99852	4.70926e-06	3.9959
WBGene00009864		F49B2.4	0.0120673	1.9974	0.00545724	3.99281
WBGene00007248	catp-4	C01G12.8	0.00653894	1.99577	0.00275839	3.98829
WBGene00014174		ZK970.8	0.00413783	1.99469	0.00165637	3.98532
WBGene00044684		T08G11.2	5.91071e-05	1.99308	1.58778e-05	3.98085
WBGene00013657		Y105C5B.18	8.11835e-05	1.99281	2.24513e-05	3.9801
WBGene00021271	spe-47	Y23H5A.4	5.23628e-09	1.992	7.60512e-10	3.97788
WBGene00022549		ZC196.5	1.20077e-26	1.98849	4.74391e-28	3.9682
WBGene00009457		F36A2.10	0.0157395	1.98765	0.00735265	3.9659
WBGene00006625	try-7	ZC581.6	0.00103698	1.98456	0.000360121	3.95741
WBGene00019980	chil-14	R09B5.12	0.0343851	1.98287	0.0177115	3.95278
WBGene00017551		F18A12.2	0.117832	1.98182	0.0726221	3.94991
WBGene00011795		T16A9.5	0.0169533	1.97346	0.00799866	3.92708
WBGene00016161		C27D6.3	0.000121836	1.97251	3.4766e-05	3.92449
WBGene00020659		T21G5.1	1.65144e-05	1.97224	4.01295e-06	3.92377
WBGene00012316	ctps-1	W06H3.3	1.58424e-84	1.97196	8.20297e-87	3.92302
WBGene00010574		K04H4.5	0.0201241	1.97171	0.00966767	3.92233
WBGene00017921		F29B9.5	5.51811e-15	1.97159	4.59438e-16	3.92199
WBGene00045306		ZC250.5	0.0105297	1.97103	0.0046872	3.92047
WBGene00016461		C35E7.9	3.30968e-05	1.96834	8.47941e-06	3.91319
WBGene00013733		Y111B2A.9	1.89545e-27	1.96789	7.17429e-29	3.91194
WBGene00044177		C30G7.3	0.0157358	1.96608	0.00734931	3.90705
WBGene00007570		C14A6.6	0.000759563	1.96595	0.00025594	3.9067
WBGene00016587		C42C1.9	0.000315028	1.96522	9.77236e-05	3.90472
WBGene00019459		K06H7.8	0.000146743	1.96419	4.25953e-05	3.90193
WBGene00003463	msp-76	ZK1251.6	0.00790168	1.96032	0.00339912	3.89147
WBGene00011790		T15H9.5	0.00302001	1.95974	0.00116891	3.88993
WBGene00007633		C16D2.1	0.00269617	1.95891	0.00102958	3.88769
WBGene00022689	math-48	ZK250.6	0.0831329	1.95345	0.0484859	3.873
WBGene00015689	spch-2	C10G11.9	0.0102652	1.9531	0.00455405	3.87204
WBGene00019157		H05C05.1	1.74109e-93	1.95291	7.30223e-96	3.87153
WBGene00007209		BE10.1	0.000129697	1.95222	3.72442e-05	3.86968
WBGene00008154		C47E12.11	0.00921947	1.95129	0.00403999	3.86719
WBGene00012711		Y39E4A.1	0.0885325	1.95094	0.0520753	3.86627
WBGene00012788		Y43D4A.2	0.121062	1.9483	0.0750269	3.8592
WBGene00012630		Y38H6C.18	0.313451	1.94758	0.231181	3.85726
WBGene00000878	cyn-2	ZK520.5	0.000519599	1.94712	0.00016885	3.85604
WBGene00008124		C47A4.3	0.000625403	1.9466	0.000206827	3.85465
WBGene00019949		R08C7.5	0.000156446	1.94443	4.56953e-05	3.84885
WBGene00019593		K09F6.10	1.05661e-12	1.94106	1.06574e-13	3.83987
WBGene00012139		T28F4.4	3.9726e-72	1.94086	2.57119e-74	3.83934
WBGene00017700		F22D3.4	0.000554068	1.93814	0.000181113	3.83212
WBGene00077563	peel-1	Y39G10AR.25	0.00631461	1.9372	0.00265558	3.82961
WBGene00013713		Y106G6G.4	0.00856499	1.9355	0.00372066	3.82512
WBGene00009609	oac-27	F41D3.4	0.0151459	1.93255	0.00704007	3.8173
WBGene00206493		Y38H8A.12	0.00600953	1.9319	0.00251173	3.81557
WBGene00018583		F48A11.2	0.0974646	1.93086	0.0581013	3.81282
WBGene00007274		C03C11.1	0.00329683	1.93022	0.0012887	3.81113
WBGene00020829		T26C11.3	0.252507	1.92811	0.178126	3.80557
WBGene00012480	clec-104	Y18D10A.10	0.000416816	1.92554	0.000132708	3.79879
WBGene00004905	snf-6	M01G5.5	1.51656e-83	1.92473	8.0096e-86	3.79665
WBGene00020653		T21E3.2	0.0148159	1.92439	0.00687057	3.79575
WBGene00014660		B0457.3	0.0692435	1.92411	0.0393849	3.79504
WBGene00007305		C04G2.2	0.000787649	1.92389	0.000266071	3.79445
WBGene00016612		C43G2.3	0.000133364	1.92388	3.83871e-05	3.79442
WBGene00007080	sfxn-1.1	AH6.2	0.0139411	1.92268	0.00641366	3.79126
WBGene00012087		T27E7.1	0.0190766	1.92196	0.00912198	3.78937
WBGene00016081		C25A6.1	0.00610913	1.92021	0.00255715	3.78478
WBGene00013521		Y73F8A.12	0.0018667	1.91943	0.000686057	3.78274
WBGene00012404		Y6G8.2	3.27803e-08	1.91783	5.32448e-09	3.77854
WBGene00015907		C17F3.1	0.000419669	1.91538	0.00013366	3.77213
WBGene00020070	rmd-6	R13H9.1	4.54859e-05	1.91347	1.19503e-05	3.76715
WBGene00021630		Y47D9A.3	0.00851707	1.90925	0.00369804	3.75614
WBGene00206524		C54E10.11	0.272528	1.90764	0.195566	3.75196
WBGene00017672		F21F3.2	0.00013499	1.90575	3.8904e-05	3.74703
WBGene00011290		R102.3	0.00434596	1.90471	0.00175162	3.74434
WBGene00022887		ZK1290.5	2.26602e-40	1.90297	4.54072e-42	3.73983
WBGene00009938		F52F12.5	0.000519213	1.90122	0.000168698	3.73529
WBGene00004384	rnp-1	ZK863.7	3.47489e-11	1.89471	4.02852e-12	3.71846
WBGene00011178		R09E10.9	0.0256863	1.8936	0.0127348	3.71561
WBGene00007314	gcy-29	C04H5.3	0.00234445	1.89259	0.00088058	3.71301
WBGene00017729		F22H10.5	0.0041876	1.89225	0.00168042	3.71214
WBGene00012526		Y32B12C.3	0.0075511	1.89113	0.00323306	3.70926
WBGene00013823		Y116F11B.7	0.0208751	1.89084	0.0100749	3.70851
WBGene00003467	msp-81	K07F5.1	0.0323179	1.88987	0.0165129	3.70603
WBGene00021207		Y18H1A.1	0.000243738	1.88496	7.38672e-05	3.69343
WBGene00022361		Y92H12A.5	5.89708e-53	1.88213	7.29768e-55	3.68619
WBGene00012498		Y24F12A.3	4.58123e-23	1.88136	2.18707e-24	3.68423
WBGene00006644	tsp-18	F59G1.2	0.00785741	1.88012	0.00337722	3.68106
WBGene00077531		F40G9.15	0.040288	1.87631	0.021186	3.67134
WBGene00012684		Y39B6A.25	0.000165062	1.87539	4.83997e-05	3.669
WBGene00019933		R07C12.3	0.15301	1.87361	0.0984703	3.66449
WBGene00012250		W04E12.5	0.00718634	1.87351	0.00306108	3.66423
WBGene00011322	irld-14	T01C3.5	0.00360656	1.87146	0.00142261	3.65903
WBGene00015089		B0252.5	0.000385298	1.87077	0.000121956	3.65729
WBGene00044979		Y41E3.19	0.00592286	1.87072	0.00246906	3.65714
WBGene00018999		F57B9.8	4.4131e-06	1.86972	9.73657e-07	3.65463
WBGene00011425		T04B2.7	0.000130026	1.86847	3.73523e-05	3.65145
WBGene00007269		C03C10.2	0.0063237	1.86838	0.00266072	3.65123
WBGene00016288		C31H1.5	0.000432994	1.86818	0.000138442	3.65072
WBGene00219743	linc-103	W05H9.5	0.217464	1.86565	0.149236	3.64432
WBGene00022064		Y67D8B.5	0.0352936	1.86505	0.0182508	3.64281
WBGene00219673	linc-96	F08F3.17	0.000247459	1.86261	7.51487e-05	3.63664
WBGene00022632		ZC581.2	0.00397166	1.85702	0.00158369	3.62258
WBGene00008660	clec-153	F10F2.8	0.000672675	1.85585	0.000223923	3.61964
WBGene00044461		Y18H1A.14	0.205377	1.85551	0.139371	3.6188
WBGene00017542		F17E9.5	0.0123491	1.85434	0.00560644	3.61586
WBGene00022494	fbxa-91	Y119D3B.18	2.00003e-05	1.85318	4.93147e-06	3.61295
WBGene00255375		F08B4.8	0.0131723	1.8472	0.00602586	3.59801
WBGene00008537		F02H6.4	6.77055e-13	1.84642	6.70289e-14	3.59606
WBGene00016565		C41D11.6	4.53493e-19	1.84491	2.79896e-20	3.59231
WBGene00044724		R02E4.3	2.81642e-08	1.84459	4.53532e-09	3.59151
WBGene00008259		C52E4.7	0.000154946	1.84436	4.51928e-05	3.59094
WBGene00006075	str-7	F22B8.5	0.000372622	1.84209	0.000117593	3.5853
WBGene00010634		K07F5.6	0.000317648	1.84174	9.86018e-05	3.58441
WBGene00021537		Y42H9AR.2	0.00926785	1.84147	0.00406359	3.58376
WBGene00013700		Y106G6D.3	0.000141489	1.84111	4.09235e-05	3.58287
WBGene00011918		T22C1.8	0.000591468	1.84059	0.000194471	3.58158
WBGene00044374		C17F4.12	0.0596831	1.83988	0.0331992	3.57979
WBGene00016707		C46E10.1	0.000988859	1.83983	0.000341771	3.57968
WBGene00018165		F38A5.8	0.0780097	1.83963	0.045173	3.57918
WBGene00007699		C24H11.1	0.0119036	1.83748	0.00537151	3.57384
WBGene00018332		F42A9.3	0.00452447	1.83698	0.00183223	3.57262
WBGene00006040	ssp-11	T28H11.6	0.0760269	1.83676	0.0438691	3.57206
WBGene00206536		C14A6.16	0.00246214	1.83664	0.000930137	3.57178
WBGene00016040		C24A11.1	6.69579e-05	1.83519	1.81913e-05	3.56819
WBGene00011053	arrd-12	R06B9.2	0.0895858	1.83511	0.0528061	3.56799
WBGene00009101		F25B3.4	4.41117e-07	1.83509	8.3573e-08	3.56793
WBGene00020840	spch-3	T27A3.4	0.0169363	1.8343	0.00798976	3.56599
WBGene00020350		T08B2.12	0.0514274	1.83342	0.0280024	3.56382
WBGene00000612	col-35	C15A11.1	0.122521	1.83332	0.0760704	3.56356
WBGene00004203	swsn-1	Y113G7B.23	2.01443e-81	1.83291	1.11606e-83	3.56256
WBGene00010612		K07A1.5	0.000739656	1.83237	0.000248518	3.56122
WBGene00012605		Y38F1A.1	3.93039e-07	1.82992	7.4098e-08	3.55518
WBGene00021996		Y59E9AL.6	0.0247005	1.82729	0.012168	3.54869
WBGene00022707		ZK354.6	0.00211427	1.82606	0.000786022	3.54568
WBGene00018926		F56A11.6	0.000575813	1.82489	0.000188638	3.5428
WBGene00235383		ZK616.65	0.00296689	1.82385	0.00114679	3.54026
WBGene00009641		F42G4.2	1.53512e-05	1.82258	3.71678e-06	3.53714
WBGene00011793		T16A9.3	7.79671e-08	1.81877	1.33827e-08	3.5278
WBGene00019202		H14N18.2	0.32212	1.81847	0.238759	3.52707
WBGene00016778	nep-3	C49D10.10	0.00454592	1.81742	0.00184256	3.52451
WBGene00016287		C31H1.2	0.0412137	1.81313	0.0217453	3.51403
WBGene00020388		T10B5.2	8.76295e-05	1.81264	2.43791e-05	3.51284
WBGene00022281	abtm-1	Y74C10AR.3	1.13199e-42	1.81196	2.08076e-44	3.51118
WBGene00010967	nduo-5	MTCE.35	1.17964e-34	1.81145	3.01735e-36	3.50996
WBGene00050881		ZK39.10	0.0386153	1.81141	0.0202004	3.50984
WBGene00007328	pho-10	C05C10.1	0.0154199	1.81003	0.00717779	3.5065
WBGene00015006		B0041.1	0.0729708	1.8098	0.0418336	3.50593
WBGene00015696		C10H11.7	0.015761	1.80786	0.00736363	3.50123
WBGene00019020		F57H12.5	5.07425e-09	1.8077	7.3619e-10	3.50084
WBGene00003674	nhr-84	T06C12.7	4.60438e-31	1.80757	1.41615e-32	3.50051
WBGene00219590	linc-72	F46C5.14	0.0175304	1.80633	0.00830272	3.49752
WBGene00018101	math-27	F36H5.2	5.87313e-13	1.80535	5.79011e-14	3.49514
WBGene00020661	smz-2	T21G5.4	0.00783276	1.8041	0.00336541	3.49211
WBGene00013879		ZC376.8	0.000868714	1.80274	0.000296378	3.48882
WBGene00017055		D2062.1	0.00507899	1.80035	0.0020823	3.48304
WBGene00017955		F31E8.5	0.000151422	1.79931	4.40788e-05	3.48054
WBGene00008036		C40C9.3	0.0117283	1.798	0.00528392	3.47737
WBGene00003452	msp-59	ZK354.11	0.0383445	1.79793	0.0200349	3.4772
WBGene00018284		F41E6.1	0.0860258	1.79692	0.050427	3.47476
WBGene00014941		Y67H2A.9	1.33904e-40	1.79434	2.64854e-42	3.46857
WBGene00003425	msp-10	K07F5.2	0.0211808	1.79342	0.010244	3.46636
WBGene00011214		R10E9.2	0.0264171	1.79341	0.0131491	3.46634
WBGene00044759		T06E6.15	0.139776	1.79335	0.0886151	3.4662
WBGene00015629		C09B9.4	0.000695109	1.7925	0.000232327	3.46414
WBGene00016826		C50E10.2	0.00118422	1.79244	0.000417263	3.46401
WBGene00020793		T25D1.1	0.244115	1.79146	0.171082	3.46166
WBGene00018975		F56E10.1	1.64507e-22	1.79056	8.18574e-24	3.4595
WBGene00022133		Y71F9B.15	0.0148804	1.79039	0.00690434	3.45908
WBGene00021175	math-46	Y8G1A.1	0.0401022	1.78917	0.0210779	3.45615
WBGene00045060		F55B11.7	0.000258296	1.78832	7.87073e-05	3.45413
WBGene00235294		Y69A2AR.47	0.193531	1.78755	0.129899	3.45228
WBGene00018612	disl-2	F48E8.6	3.1887e-53	1.78661	3.91302e-55	3.45004
WBGene00009778		F46C5.1	1.41822e-05	1.78618	3.41024e-06	3.44899
WBGene00009643		F42G4.6	4.71254e-05	1.78526	1.24249e-05	3.44682
WBGene00013556		Y75B8A.23	0.000197909	1.7845	5.89125e-05	3.44499
WBGene00009714		F44G4.5	0.00180618	1.7823	0.000661571	3.43974
WBGene00018978	ttr-58	F56F4.1	0.14778	1.78181	0.0945689	3.43857
WBGene00010611		K07A1.4	0.00080661	1.78065	0.000273019	3.43581
WBGene00013304		Y57G11C.6	0.0032417	1.78037	0.00126442	3.43515
WBGene00019531	scrm-5	K08D10.8	0.000258271	1.77907	7.86862e-05	3.43206
WBGene00021907		Y55B1AR.3	0.16099	1.77852	0.104464	3.43074
WBGene00206368		Y39F10C.3	0.0869537	1.77846	0.0510431	3.43061
WBGene00220258		C50C3.19	0.166784	1.77779	0.109027	3.429
WBGene00012877		Y45F10C.1	0.00181209	1.77743	0.000664486	3.42815
WBGene00019626		K10C9.7	0.000359384	1.7762	0.000112934	3.42522
WBGene00022833		ZK973.4	0.0322146	1.7749	0.0164501	3.42214
WBGene00019466	tos-1	K07B1.6	2.61236e-82	1.77043	1.39322e-84	3.41155
WBGene00013723		Y106G6H.13	0.0141233	1.77037	0.00651134	3.41143
WBGene00044122		T28B8.6	0.0111704	1.76928	0.00500362	3.40884
WBGene00022849	acs-6	ZK1127.2	6.20296e-07	1.76785	1.19961e-07	3.40545
WBGene00000544	clp-3	Y47H10A.1	8.44767e-05	1.76559	2.34407e-05	3.40013
WBGene00017354		F10E9.2	8.78217e-06	1.76514	2.04219e-06	3.39908
WBGene00015894	acdh-2	C17C3.12	2.50748e-47	1.76285	3.79115e-49	3.39368
WBGene00219377		F47C12.12	0.222605	1.76273	0.153367	3.3934
WBGene00015080		B0244.5	1.35814e-05	1.7623	3.25664e-06	3.39239
WBGene00021650		Y47G6A.26	0.00489609	1.75962	0.00199844	3.38608
WBGene00010790	sodh-1	K12G11.3	4.96743e-84	1.75938	2.59778e-86	3.38552
WBGene00044205		T13F3.8	0.000591816	1.75879	0.000194679	3.38413
WBGene00045484		F34D10.9	2.58846e-08	1.75852	4.14277e-09	3.38351
WBGene00235271		C49C8.8	0.0496297	1.75333	0.0268694	3.37136
WBGene00010633	nspd-2	K07F5.5	0.0219839	1.75207	0.0106806	3.36843
WBGene00019063		F58F12.3	0.00525994	1.75146	0.00216629	3.36699
WBGene00011210		R10E8.4	1.36835e-07	1.75103	2.42453e-08	3.36598
WBGene00018004		F33D11.7	0.0007925	1.74877	0.000267915	3.36071
WBGene00013194		Y54E2A.9	0.0043216	1.74649	0.00173956	3.3554
WBGene00018575	clec-119	F47F6.5	0.00350619	1.74564	0.00137938	3.35344
WBGene00044760		Y71H2AM.25	0.0028635	1.74277	0.00110208	3.34676
WBGene00009028		F21H7.2	0.0297566	1.73979	0.0150408	3.33986
WBGene00012491		Y20C6A.1	1.49809e-16	1.73937	1.09993e-17	3.33889
WBGene00021497		Y40C5A.4	3.95662e-05	1.7391	1.02885e-05	3.33827
WBGene00010006		F53H2.3	4.41902e-68	1.73826	3.18047e-70	3.33632
WBGene00015988		C18H2.1	1.84631e-06	1.73135	3.83067e-07	3.32039
WBGene00000639	col-63	ZK265.2	0.0100755	1.73107	0.00445894	3.31975
WBGene00013586		Y80D3A.8	0.00479606	1.73014	0.00195389	3.31761
WBGene00005681	sru-18	T04A11.9	0.283297	1.72899	0.204379	3.31495
WBGene00044062	snb-6	T14D7.3	0.00515138	1.72827	0.00211545	3.3133
WBGene00219723	linc-135	T01B11.10	0.0490075	1.72764	0.0264742	3.31186
WBGene00007249		C01G12.9	0.0142352	1.72672	0.00657076	3.30974
WBGene00003431	msp-33	R05F9.8	0.0256294	1.72669	0.0127012	3.30967
WBGene00012357		W09D6.4	0.000193081	1.72619	5.73655e-05	3.30853
WBGene00009451	cids-2	F36A2.1	1.50642e-09	1.72594	2.05687e-10	3.30795
WBGene00004973	spe-27	C06E7.6	0.131096	1.72253	0.082141	3.30015
WBGene00013854	cyc-2.2	ZC116.2	0.0507396	1.72173	0.0275596	3.29831
WBGene00044606		T07G12.14	0.179402	1.72088	0.118771	3.29637
WBGene00009125		F25H5.2	0.00255856	1.72067	0.000971199	3.2959
WBGene00019178	scl-12	H10D18.2	0.0748158	1.71671	0.0430657	3.28685
WBGene00023252		C39H7.2	0.00517256	1.71038	0.00212522	3.27246
WBGene00008299		C54D10.4	0.00218755	1.70929	0.000815984	3.26999
WBGene00015348		C02F5.5	0.00297397	1.70794	0.00115014	3.26695
WBGene00000638	col-62	C15A11.6	0.0038319	1.70466	0.00152042	3.25952
WBGene00023483		Y75B8A.39	0.16651	1.70242	0.108821	3.25446
WBGene00012946		Y47H9B.2	0.00753787	1.70122	0.00322549	3.25177
WBGene00022378		Y94H6A.5	0.000614684	1.70085	0.000202964	3.25092
WBGene00011027		R05D7.2	0.0262889	1.69512	0.0130757	3.23804
WBGene00045062		Y38H8A.8	2.31472e-10	1.69444	2.92992e-11	3.2365
WBGene00009513	sfxn-1.2	F37H8.4	0.00519391	1.68758	0.0021356	3.22115
WBGene00012636		Y38H8A.2	0.0529876	1.68525	0.0290028	3.21595
WBGene00016650	ubr-4	C44E4.1	2.4233e-60	1.68494	2.33384e-62	3.21527
WBGene00013789		Y116A8C.9	3.11872e-35	1.68286	7.76732e-37	3.21064
WBGene00007060	wht-6	T26A5.1	7.24308e-08	1.68147	1.238e-08	3.20754
WBGene00004855	sma-1	R31.1	1.72631e-32	1.68075	4.85367e-34	3.20595
WBGene00011954		T23F11.2	0.000232793	1.68061	7.03092e-05	3.20563
WBGene00018468	tag-80	F45E4.3	0.0343444	1.67752	0.0176788	3.19877
WBGene00219618	linc-60	Y41E3.462	0.0277931	1.67712	0.0139404	3.19789
WBGene00007446	mboa-4	C08F8.4	0.00401682	1.67458	0.00160336	3.19226
WBGene00235354		ZK250.14	0.0228683	1.67442	0.0111494	3.19192
WBGene00044895		R06A10.5	0.0735188	1.67338	0.0421973	3.18962
WBGene00021598		Y46E12BR.1	0.103261	1.67188	0.0621124	3.1863
WBGene00011336	ubxn-5	T01E8.9	0.00582498	1.6718	0.00242313	3.18612
WBGene00015997		C18H7.7	0.00584015	1.67166	0.00243004	3.18582
WBGene00001902	his-28	K06C4.2	0.07373	1.67131	0.0423376	3.18503
WBGene00194700		B0025.5	0.00300327	1.66672	0.00116225	3.17492
WBGene00014085		ZK809.1	0.00195858	1.66506	0.000722869	3.17128
WBGene00013543		Y75B8A.6	2.62785e-13	1.66372	2.51314e-14	3.16832
WBGene00020832		T26C12.2	0.00194717	1.66153	0.000718457	3.16352
WBGene00016692	srbc-24	C45H4.10	0.326325	1.66086	0.242636	3.16205
WBGene00000725	col-152	F32G8.5	0.00971161	1.66072	0.00428129	3.16173
WBGene00019214		H20E11.2	0.00738395	1.66035	0.00315461	3.16094
WBGene00007714		C25D7.1	0.00553752	1.65949	0.00229151	3.15906
WBGene00014102	best-25	ZK849.4	0.00368197	1.6536	0.00145559	3.14617
WBGene00014100		ZK849.1	0.00426522	1.6488	0.00171443	3.13572
WBGene00020419	acdh-4	T10E9.9	4.14836e-08	1.64775	6.84126e-09	3.13345
WBGene00006498	ten-1	R13F6.4	4.47265e-25	1.64622	1.92913e-26	3.13012
WBGene00020084		R105.1	0.0302237	1.64557	0.0153067	3.12871
WBGene00044777		T02B11.9	0.0167537	1.64405	0.00789138	3.12542
WBGene00012828		Y43F8C.6	1.13421e-27	1.64357	4.23771e-29	3.12437
WBGene00009991		F53F4.8	0.00257159	1.64063	0.000976545	3.11801
WBGene00008874		F15H10.7	0.000516583	1.64044	0.000167656	3.11762
WBGene00007427		C08B6.6	0.18406	1.63974	0.12243	3.1161
WBGene00018416	retr-1	F44E2.2	3.47727e-133	1.63856	8.28221e-136	3.11354
WBGene00219274		T25G12.13	0.133386	1.63674	0.0838175	3.10963
WBGene00011949		T23F6.1	0.0033082	1.63464	0.00129395	3.1051
WBGene00018318		F41H10.5	9.59981e-05	1.63341	2.68713e-05	3.10246
WBGene00022589		ZC317.6	5.78523e-05	1.63222	1.55167e-05	3.09989
WBGene00016581		C42C1.3	0.0685715	1.62994	0.0389423	3.095
WBGene00008793		F14D7.6	3.84117e-20	1.62994	2.21166e-21	3.095
WBGene00198315		K02A11.9	0.391161	1.62812	0.302065	3.09109
WBGene00012754		Y41C4A.7	0.0471715	1.62811	0.0253334	3.09108
WBGene00017817		F26B1.5	0.0232143	1.62806	0.0113397	3.09096
WBGene00009962		F53B6.7	9.55689e-05	1.62655	2.67462e-05	3.08775
WBGene00014116		ZK858.2	0.0004089	1.62173	0.00013004	3.07744
WBGene00015149		B0336.12	0.383399	1.61942	0.29482	3.07252
WBGene00016389		C34B2.4	0.266261	1.61642	0.190242	3.06613
WBGene00235259		T05C7.6	0.103133	1.61604	0.0619865	3.06533
WBGene00009129		F25H5.7	1.66234e-06	1.61566	3.4197e-07	3.06451
WBGene00012871		Y45F10B.3	0.0315548	1.6147	0.016074	3.06248
WBGene00018970	clec-68	F56D6.1	0.0940482	1.61391	0.0558163	3.06081
WBGene00016523		C39B5.5	0.0312279	1.61288	0.0158912	3.05862
WBGene00044261		Y87G2A.20	0.00754423	1.61108	0.00322933	3.0548
WBGene00004047	plx-1	Y55F3AL.1	2.60038e-37	1.60893	5.89741e-39	3.05026
WBGene00002075	imb-1	F28B3.8	5.95455e-62	1.60803	5.17975e-64	3.04835
WBGene00044015		K06A4.8	0.0230837	1.60792	0.0112663	3.04813
WBGene00016075		C24H12.6	0.163012	1.60711	0.106056	3.04641
WBGene00008811		F14F7.4	0.00106919	1.60667	0.000372775	3.04547
WBGene00000596	col-7	C15A11.5	0.0618369	1.60271	0.0345766	3.03714
WBGene00045412		C25F9.12	0.165979	1.5998	0.108432	3.03101
WBGene00012961		Y47H10A.5	7.70028e-25	1.5998	3.36511e-26	3.031
WBGene00219746	linc-91	W09C3.9	0.0404966	1.5997	0.021304	3.03081
WBGene00003060	lpd-3	Y47G6A.23	3.21961e-50	1.59904	4.45108e-52	3.02943
WBGene00219322		C33C12.12	0.0979415	1.59781	0.0584233	3.02683
WBGene00008313		C54G4.3	0.00189621	1.59778	0.000698474	3.02676
WBGene00017736		F23C8.7	1.12379e-09	1.5945	1.51813e-10	3.0199
WBGene00007986		C36F7.5	0.00277872	1.5906	0.00106456	3.01174
WBGene00021367		Y37E11AM.3	2.30395e-32	1.58891	6.51351e-34	3.00822
WBGene00003905	pad-1	Y18D10A.13	1.2226e-43	1.58852	2.15236e-45	3.00741
WBGene00016177		C28C12.1	0.000127838	1.58613	3.66309e-05	3.00242
WBGene00008650		F10D11.4	0.0957535	1.58299	0.0569424	2.99591
WBGene00010175		F56H11.2	0.00529735	1.58289	0.0021828	2.9957
WBGene00002025	hsp-60	Y22D7AL.5	3.89591e-59	1.58211	3.89329e-61	2.99407
WBGene00013498		Y70G10A.2	0.0248058	1.58173	0.0122289	2.99328
WBGene00020913		W01B11.1	0.103998	1.58036	0.0626799	2.99044
WBGene00014179		ZK1010.5	0.0110397	1.58018	0.00493767	2.99007
WBGene00001806	gur-5	ZK622.2	3.5323e-05	1.58002	9.10099e-06	2.98975
WBGene00015061	cpna-2	B0228.4	1.28866e-64	1.57938	1.00088e-66	2.98841
WBGene00002008	hsp-4	F43E2.8	7.9874e-93	1.5791	3.43268e-95	2.98783
WBGene00000549	cls-2	R107.6	4.70494e-45	1.57854	7.79569e-47	2.98668
WBGene00013250		Y57A10A.5	2.41542e-27	1.57802	9.24246e-29	2.98559
WBGene00003449	msp-56	K07F5.3	0.0780097	1.57742	0.0451748	2.98437
WBGene00011203		R10E4.7	8.16428e-07	1.57737	1.60428e-07	2.98425
WBGene00020053		R13A5.11	0.00264973	1.5743	0.00101034	2.97791
WBGene00138721		C54D10.14	0.0237132	1.57255	0.0116092	2.9743
WBGene00018360	irld-8	F42G8.9	0.00151313	1.57067	0.000544205	2.97043
WBGene00016561	eri-6	C41D11.1	7.96997e-05	1.5696	2.19914e-05	2.96823
WBGene00044392		C25H3.16	0.178507	1.56375	0.118068	2.95621
WBGene00196933		F43D9.8	0.209103	1.5636	0.142463	2.95591
WBGene00016847		C50F7.9	0.37952	1.5599	0.291208	2.94832
WBGene00016168		C27F2.6	0.217709	1.55939	0.149453	2.9473
WBGene00011729	set-16	T12D8.1	6.38713e-41	1.55922	1.25672e-42	2.94694
WBGene00004130	ketn-1	F54E2.3	7.35947e-21	1.55554	4.02784e-22	2.93943
WBGene00016354	rig-6	C33F10.5	1.69033e-48	1.55532	2.47689e-50	2.93899
WBGene00018548	clec-79	F47C12.4	0.00565531	1.55506	0.00234523	2.93846
WBGene00004457	rpm-1	C01B7.6	1.0876e-17	1.55493	7.34904e-19	2.9382
WBGene00011469	dylt-3	T05C12.5	0.194706	1.5547	0.130889	2.93773
WBGene00020372		T09A12.1	0.00705391	1.55412	0.0029979	2.93655
WBGene00021497		Y40C5A.4	3.80866e-14	1.55149	3.39394e-15	2.93119
WBGene00010991		R03D7.5	0.0252285	1.55134	0.0124712	2.93089
WBGene00007948		C35A5.4	0.0137873	1.5503	0.00633325	2.92878
WBGene00022405	srsx-6	Y97E10B.3	0.254916	1.54736	0.180191	2.92281
WBGene00013303		Y57G11C.5	3.54006e-06	1.54467	7.70224e-07	2.91738
WBGene00022288		Y75B7B.1	0.000703278	1.54365	0.000235385	2.91532
WBGene00235300		T06A10.107	0.0315975	1.54249	0.0161006	2.91296
WBGene00020177		T02H6.7	0.0399443	1.53988	0.0209866	2.90771
WBGene00004314	rbc-2	Y54F10AM.10	3.60053e-101	1.53926	1.37958e-103	2.90645
WBGene00017910		F28H1.5	0.0653752	1.52837	0.0368326	2.8846
WBGene00013198		Y54E5A.2	4.48826e-14	1.5262	4.01953e-15	2.88026
WBGene00194769		Y32B12C.5	1.66568e-14	1.52609	1.44895e-15	2.88004
WBGene00009581		F40F9.3	0.00327076	1.52279	0.00127711	2.87347
WBGene00010247		F58D5.8	0.141939	1.52159	0.090192	2.87108
WBGene00045036		K08E4.7	0.00796972	1.52068	0.00343208	2.86927
WBGene00012474	attf-6	Y18D10A.1	1.87233e-39	1.51815	3.91664e-41	2.86423
WBGene00019640	dos-2	K10G6.2	0.0316017	1.51767	0.0161044	2.86328
WBGene00007222		C01F6.2	1.6519e-06	1.51708	3.39481e-07	2.8621
WBGene00004971	spe-17	ZK617.3	0.10368	1.514	0.0624182	2.85602
WBGene00016002		C18H9.3	3.83502e-33	1.51337	1.04648e-34	2.85476
WBGene00006593	tol-1	C07F11.1	1.17848e-65	1.5111	8.90892e-68	2.85026
WBGene00012268		W04G5.8	0.0748513	1.50891	0.0430938	2.84594
WBGene00013158		Y53F4B.11	0.00804179	1.50639	0.00346688	2.84097
WBGene00194981		Y49E10.30	0.000356972	1.50614	0.000112121	2.84049
WBGene00018681	denn-4	F52C12.4	4.08584e-55	1.50598	4.6543e-57	2.84017
WBGene00004343	rgr-1	C38C10.5	4.07519e-64	1.50553	3.18622e-66	2.83929
WBGene00045308		C37H5.14	7.42615e-09	1.50364	1.10168e-09	2.83558
WBGene00013449		Y67A6A.1	0.00904897	1.50007	0.00395591	2.82856
WBGene00012831		Y43F8C.9	0.00157484	1.49839	0.000568272	2.82527
WBGene00077682		F58B4.7	0.116178	1.49771	0.0714464	2.82393
WBGene00003691	nhr-101	H12C20.6	3.30038e-09	1.49744	4.6892e-10	2.82341
WBGene00017815		F26B1.1	0.106284	1.49226	0.0642946	2.8133
WBGene00011414		T04A8.13	0.00106522	1.492	0.000371087	2.81279
WBGene00012345		W08E3.4	0.00249856	1.48662	0.000945709	2.80232
WBGene00219491		Y53F4B.62	0.0169001	1.48223	0.00797006	2.79381
WBGene00005616	srj-29	F22B8.1	0.317677	1.48111	0.234848	2.79163
WBGene00019280		K01A2.5	1.5476e-27	1.48046	5.83366e-29	2.79038
WBGene00012904	tiar-2	Y46G5A.13	2.3839e-23	1.47909	1.12326e-24	2.78773
WBGene00006048	ssp-31	ZK1225.6	0.00829014	1.47886	0.00358683	2.78729
WBGene00021746		Y50D4B.7	0.192809	1.47709	0.129335	2.78386
WBGene00044700		T08D2.9	1.28614e-05	1.47274	3.07134e-06	2.77549
WBGene00003702	nhr-112	Y70C5C.6	3.71777e-06	1.47242	8.11392e-07	2.77488
WBGene00020377		T09B4.3	0.00016898	1.47211	4.96712e-05	2.77428
WBGene00018232		F40E3.5	3.49074e-05	1.47168	8.97582e-06	2.77344
WBGene00016414		C34F11.2	0.015761	1.47158	0.00736488	2.77326
WBGene00020978		W03B1.9	0.0330498	1.46825	0.0169365	2.76687
WBGene00013764		Y113G7B.15	0.128258	1.46786	0.0800906	2.76612
WBGene00021936		Y55F3BL.2	5.95054e-69	1.46461	4.22111e-71	2.75989
WBGene00009874		F49C12.4	0.488802	1.46409	0.396499	2.7589
WBGene00018995	ccpp-1	F56H1.5	1.77967e-73	1.46357	1.10579e-75	2.7579
WBGene00000694	col-120	Y11D7A.11	0.112504	1.46323	0.0687502	2.75726
WBGene00014241		ZK1251.3	0.174409	1.4631	0.114834	2.75699
WBGene00013652	sams-2	Y105C5B.12	0.0454723	1.4622	0.0243148	2.75528
WBGene00013424		Y66A7A.4	0.00124394	1.46154	0.000440693	2.75403
WBGene00018528		F47B3.4	0.00897319	1.46093	0.00391767	2.75286
WBGene00012827		Y43F8C.5	0.0061975	1.45916	0.00260056	2.74948
WBGene00044744		F10G7.12	0.213207	1.45213	0.145789	2.73612
WBGene00012999	rpoa-1	Y48E1A.1	1.86911e-43	1.45151	3.30986e-45	2.73495
WBGene00197335		C05D2.14	0.502045	1.4513	0.41023	2.73454
WBGene00001881	his-7	F45F2.4	0.00985972	1.45087	0.00435272	2.73373
WBGene00011973		T23G11.10	0.0832331	1.44966	0.0485487	2.73144
WBGene00010216		F57G8.7	0.105789	1.44668	0.0639346	2.7258
WBGene00044799		ZK686.6	0.0705277	1.44343	0.0402139	2.71967
WBGene00003919	par-4	Y59A8B.14	3.90303e-49	1.44336	5.57779e-51	2.71953
WBGene00022449		Y110A2AM.1	3.05767e-13	1.44324	2.94004e-14	2.71932
WBGene00014229		ZK1128.3	0.0029227	1.44193	0.00112759	2.71685
WBGene00009075		F23B2.7	0.00683514	1.44186	0.00289537	2.71671
WBGene00006047	ssp-19	C55C2.2	0.00912112	1.44123	0.00399265	2.71553
WBGene00195178		ZC581.10	0.136793	1.44078	0.0863765	2.71468
WBGene00013523		Y73F8A.14	0.0477835	1.43756	0.0257041	2.70862
WBGene00015422		C04E6.5	0.0155006	1.43706	0.00722261	2.70769
WBGene00012718	dhhc-8	Y39E4B.7	7.06757e-30	1.43454	2.3311e-31	2.70296
WBGene00219598	linc-113	K02B12.13	0.308928	1.43421	0.226965	2.70235
WBGene00001650	gon-1	F25H8.3	0.00438753	1.4323	0.00176973	2.69876
WBGene00020986		W03D8.3	0.0921738	1.43165	0.0545512	2.69755
WBGene00022338		Y82E9BR.5	1.7988e-06	1.43157	3.72651e-07	2.6974
WBGene00006863	gyg-1	F56B6.4	1.92631e-93	1.43145	8.17882e-96	2.69717
WBGene00022153		Y71G12B.13	4.05501e-65	1.43035	3.12844e-67	2.69513
WBGene00019084		F59A6.2	0.0110305	1.42868	0.00493295	2.692
WBGene00017271		F08F8.6	0.00223692	1.42809	0.000835925	2.69091
WBGene00012926		Y47D3A.13	0.00507038	1.42784	0.00207794	2.69044
WBGene00005024	sqv-6	Y50D4C.4	5.14692e-52	1.42755	6.63586e-54	2.6899
WBGene00013107		Y51H4A.13	8.48919e-08	1.42735	1.46509e-08	2.68953
WBGene00019592		K09F6.9	5.50136e-10	1.42719	7.22956e-11	2.68923
WBGene00001734	grl-25	ZK643.8	0.478674	1.42649	0.386374	2.68792
WBGene00000485	che-3	F18C12.1	1.97313e-17	1.42516	1.35574e-18	2.68544
WBGene00010563		K04G2.4	0.00172463	1.42355	0.000628219	2.68244
WBGene00021759		Y50D7A.11	4.35911e-17	1.42319	3.06512e-18	2.68178
WBGene00013537		Y73F8A.33	0.203982	1.42318	0.138266	2.68175
WBGene00011968		T23G11.1	0.0559954	1.42243	0.0308637	2.68037
WBGene00022650		ZK84.2	0.0105685	1.42076	0.00470665	2.67727
WBGene00008312		C54G4.2	0.00489846	1.41983	0.00199991	2.67553
WBGene00014029		ZK637.12	0.0103706	1.41719	0.00460671	2.67066
WBGene00016251		C30E1.2	0.253243	1.41674	0.17879	2.66981
WBGene00014154		ZK930.4	0.00196497	1.41606	0.000725327	2.66856
WBGene00016322		C32E8.4	0.0513425	1.41573	0.0279455	2.66795
WBGene00017741		F23C8.13	0.0868085	1.41423	0.0509428	2.66517
WBGene00013148		Y53F4A.2	0.0817169	1.41183	0.0475501	2.66074
WBGene00008221	nhr-168	C50B6.8	0.000318912	1.41166	9.90438e-05	2.66042
WBGene00000972	dhs-8	K10H10.3	0.000827819	1.40772	0.000280926	2.65318
WBGene00044495		Y54G2A.40	0.000171351	1.40724	5.04746e-05	2.65229
WBGene00021044		W05H7.1	7.00707e-32	1.4064	2.04991e-33	2.65075
WBGene00013258	polg-1	Y57A10A.15	1.34053e-45	1.40593	2.15868e-47	2.64988
WBGene00015892		C17C3.9	0.260063	1.40584	0.184709	2.64972
WBGene00015024		B0205.10	0.02951	1.40292	0.0149009	2.64435
WBGene00007131		B0284.1	0.00463369	1.40188	0.00188174	2.64245
WBGene00194894		T05B4.14	0.0432272	1.40103	0.0229577	2.6409
WBGene00013858	ssp-34	ZC168.6	0.00512535	1.39953	0.00210237	2.63816
WBGene00005079	srd-1	F33H1.5	0.47363	1.39907	0.381584	2.63731
WBGene00012730	xrn-1	Y39G8C.1	5.877e-28	1.39808	2.16664e-29	2.6355
WBGene00012219		W03C9.1	0.00127111	1.39757	0.000451303	2.63458
WBGene00007538		C12D8.9	0.234968	1.39659	0.163491	2.63279
WBGene00010004		F53H2.1	0.0958016	1.39553	0.056976	2.63085
WBGene00019026		F58A6.9	0.00236707	1.39507	0.000890302	2.63002
WBGene00017595		F19C7.5	0.0989873	1.3949	0.0592038	2.6297
WBGene00019834		R02F2.5	0.0288251	1.39457	0.0145133	2.6291
WBGene00021681		Y48G1C.8	3.2396e-49	1.39314	4.61291e-51	2.6265
WBGene00050940		C25D7.16	0.0808487	1.39224	0.0469737	2.62485
WBGene00020699		T22F3.10	0.0491796	1.39192	0.026585	2.62428
WBGene00010779		K11H3.2	0.00100936	1.38979	0.000349536	2.6204
WBGene00000684	col-110	F19C7.7	0.000516646	1.38751	0.00016773	2.61627
WBGene00013785	nep-23	Y116A8C.4	0.0037629	1.38037	0.00149051	2.60336
WBGene00045188		B0284.5	0.150017	1.37958	0.0962258	2.60192
WBGene00008896		F16H6.6	0.190385	1.3784	0.127541	2.5998
WBGene00010977		R02D5.3	2.71429e-08	1.37591	4.35259e-09	2.59532
WBGene00020981		W03D2.6	1.06974e-10	1.37323	1.30886e-11	2.59049
WBGene00018804		F54D10.3	6.24664e-11	1.37288	7.44241e-12	2.58986
WBGene00015558		C06G4.4	0.0430372	1.37197	0.0228345	2.58824
WBGene00012596	nhr-234	Y38E10A.18	0.213595	1.37142	0.14612	2.58725
WBGene00010460	clec-142	K01C8.8	0.000389197	1.36588	0.000123311	2.57733
WBGene00017721		F22F7.3	0.029624	1.36558	0.0149677	2.57681
WBGene00043053		F47H4.12	0.0243695	1.36453	0.0119759	2.57493
WBGene00021316		Y32H12A.8	1.70494e-24	1.36276	7.56554e-26	2.57177
WBGene00021496		Y40C5A.3	0.124543	1.3616	0.0774487	2.5697
WBGene00000395	cdh-3	ZK112.7	4.33129e-11	1.36033	5.07968e-12	2.56743
WBGene00016441		C35D10.3	0.0911353	1.35795	0.0538422	2.5632
WBGene00013681		Y105E8A.24	5.68037e-30	1.35741	1.85885e-31	2.56225
WBGene00001328	epi-1	K08C7.3	6.72273e-29	1.35591	2.37052e-30	2.55958
WBGene00015887		C17C3.1	5.9111e-07	1.35512	1.13919e-07	2.55818
WBGene00009460	ubr-5	F36A2.13	1.04249e-30	1.34888	3.2765e-32	2.54714
WBGene00013153		Y53F4B.6	0.0173459	1.34832	0.00820279	2.54615
WBGene00012720		Y39E4B.11	0.00762763	1.34467	0.00326938	2.53971
WBGene00004455	rpl-42	C09H10.1	0.168725	1.34445	0.110541	2.53933
WBGene00008659	clec-151	F10F2.7	0.0387555	1.34341	0.0202757	2.53751
WBGene00007578		C14B1.7	2.12983e-13	1.34243	2.01812e-14	2.53579
WBGene00008397		D2005.1	4.53616e-06	1.34213	1.00253e-06	2.53525
WBGene00022383		Y95B8A.2	1.12399e-12	1.34131	1.13661e-13	2.53382
WBGene00195151		F53H2.4	1.50753e-21	1.34034	7.91507e-23	2.53211
WBGene00007863		C32C4.3	0.00435112	1.33859	0.00175392	2.52903
WBGene00018807	fbxa-146	F54D10.6	9.95219e-08	1.33623	1.73557e-08	2.5249
WBGene00011728		T12A7.7	0.240337	1.33552	0.167973	2.52366
WBGene00009942		F52F12.9	0.0115815	1.33505	0.00520695	2.52283
WBGene00021701		Y48G9A.7	0.21674	1.33422	0.148687	2.5214
WBGene00015034		B0207.11	0.0355119	1.33395	0.0183765	2.52092
WBGene00013052	scrm-7	Y50E8A.9	0.131737	1.33347	0.0826521	2.52009
WBGene00005256	srh-33	M02H5.9	0.436882	1.33161	0.345628	2.51683
WBGene00000962	dhc-1	T21E12.4	1.59004e-32	1.33157	4.43759e-34	2.51676
WBGene00195363		M01H9.6	0.190359	1.32863	0.127498	2.51164
WBGene00007932	zip-5	C34D1.5	1.70365e-12	1.32714	1.74485e-13	2.50905
WBGene00017216		F07F6.2	0.0305827	1.32683	0.0155234	2.50851
WBGene00020353		T08B6.4	0.0401894	1.32437	0.02113	2.50424
WBGene00010013		F54B3.1	9.82352e-26	1.32281	4.06919e-27	2.50153
WBGene00004746	sdc-2	C35C5.1	8.96556e-18	1.32171	6.02563e-19	2.49962
WBGene00010114		F55D12.6	0.043567	1.3205	0.0231697	2.49753
WBGene00009252		F29D10.3	0.2997	1.31945	0.218804	2.49571
WBGene00021281	ell-1	Y24D9A.1	1.39617e-34	1.31834	3.61457e-36	2.49378
WBGene00008412		D2030.2	8.44118e-36	1.31812	2.06735e-37	2.49342
WBGene00007747		C26E1.1	0.419144	1.3173	0.328166	2.492
WBGene00012781	nspd-7	Y43C5A.1	0.0446595	1.31504	0.0238233	2.4881
WBGene00013044		Y49E10.25	0.401479	1.31468	0.31116	2.48748
WBGene00008063		C41G7.6	0.118683	1.31276	0.0732245	2.48415
WBGene00016662		C45B2.8	0.0946402	1.31255	0.0562032	2.48381
WBGene00012917		Y46G5A.29	4.82886e-06	1.3116	1.07339e-06	2.48216
WBGene00013427		Y66D12A.1	0.403167	1.31077	0.312944	2.48074
WBGene00008403		D2013.3	1.4154e-08	1.31053	2.18061e-09	2.48032
WBGene00022363		Y92H12BL.1	2.74471e-38	1.31048	6.0542e-40	2.48025
WBGene00013313		Y57G11C.18	0.124907	1.30968	0.0777164	2.47887
WBGene00013613		Y102A5C.4	0.145277	1.30859	0.0926663	2.47699
WBGene00019410		K05F1.9	0.109174	1.30853	0.0663251	2.47688
WBGene00008155		C47E12.12	0.0765972	1.30754	0.0442378	2.4752
WBGene00017215		F07F6.1	0.00577889	1.30625	0.00240156	2.47298
WBGene00002204	kin-21	W08D2.8	0.0361117	1.30273	0.01872	2.46695
WBGene00195085		C56E6.9	3.13503e-21	1.30221	1.67684e-22	2.46606
WBGene00007515		C10C6.7	0.000868655	1.301	0.000296313	2.46399
WBGene00001752	gst-4	K08F4.7	4.15725e-12	1.29595	4.4368e-13	2.45538
WBGene00022467		Y119C1B.1	0.0461167	1.29591	0.0246883	2.45531
WBGene00000236	bag-1	F57B10.11	2.20164e-42	1.29312	4.08111e-44	2.45058
WBGene00005149	sre-1	B0495.1	0.419996	1.29283	0.328921	2.45008
WBGene00008829	cyp-35D1	F14H3.10	4.89792e-07	1.29112	9.35305e-08	2.44719
WBGene00206355		C34C6.10	0.0235587	1.29022	0.0115238	2.44565
WBGene00007366		C06B3.7	4.30533e-06	1.28598	9.47872e-07	2.43848
WBGene00001398	fat-6	VZK822L.1	8.07051e-51	1.28193	1.09484e-52	2.43164
WBGene00020882		T28A11.20	0.422243	1.28159	0.331183	2.43107
WBGene00015525	rha-2	C06E1.10	1.94424e-34	1.28096	5.05365e-36	2.43
WBGene00044897		M01D7.9	0.433849	1.27566	0.342569	2.42109
WBGene00011693		T10G3.2	0.37042	1.26915	0.282615	2.4102
WBGene00000973	dhs-9	Y32H12A.3	4.05745e-43	1.26907	7.29008e-45	2.41006
WBGene00044207		Y6G8.5	0.372348	1.26657	0.284317	2.40589
WBGene00219460		K09H9.9	0.230992	1.26558	0.160174	2.40423
WBGene00015345		C02F5.2	0.0350251	1.26335	0.0181029	2.40053
WBGene00077616		F57E7.4	0.353091	1.26293	0.267039	2.39983
WBGene00008994		F21A3.4	0.0527846	1.26206	0.0288753	2.39839
WBGene00235280		F42A9.17	0.242357	1.25893	0.169624	2.39318
WBGene00000736	col-163	F46B3.17	0.426103	1.25836	0.334777	2.39223
WBGene00011629		T08G11.1	3.52408e-26	1.25833	1.41598e-27	2.39218
WBGene00018278		F41C6.4	0.00563736	1.25831	0.00233662	2.39216
WBGene00019490		K07E3.1	2.04998e-40	1.25716	4.08659e-42	2.39024
WBGene00013350	slr-2	Y59A8B.13	3.68491e-26	1.25669	1.48633e-27	2.38947
WBGene00009550		F38H4.6	0.0764407	1.25614	0.0441395	2.38855
WBGene00016735	fhod-1	C46H11.11	7.0994e-30	1.2528	2.34527e-31	2.38304
WBGene00021889		Y54G2A.24	0.127943	1.25108	0.0798612	2.3802
WBGene00001736	grl-27	F40C5.3	0.0854987	1.24909	0.0500738	2.37692
WBGene00018900	rod-1	F55G1.4	5.29522e-50	1.24881	7.37542e-52	2.37645
WBGene00013511		Y71A12B.15	0.327243	1.2485	0.243488	2.37594
WBGene00008854		F15D3.4	8.65951e-05	1.24789	2.40644e-05	2.37494
WBGene00020627		T20F5.5	3.41154e-06	1.24623	7.39965e-07	2.3722
WBGene00006258	str-227	C07G3.3	0.299058	1.24417	0.218215	2.36882
WBGene00015765		C14C11.1	0.000669544	1.24256	0.000222707	2.36617
WBGene00013362	algn-7	Y60A3A.14	1.0005e-19	1.24186	5.93163e-21	2.36503
WBGene00014668		C06C3.9	0.0958177	1.23985	0.0569955	2.36175
WBGene00015188		B0432.7	2.47424e-27	1.23799	9.48034e-29	2.3587
WBGene00004954	spd-3	H34C03.1	8.87836e-14	1.23595	8.13225e-15	2.35537
WBGene00010018	fbxa-69	F54B8.3	4.07572e-06	1.23554	8.94578e-07	2.3547
WBGene00018611		F48E8.4	2.78121e-39	1.23543	5.86109e-41	2.35452
WBGene00000188	arl-3	F19H8.3	0.0167541	1.2334	0.0078934	2.3512
WBGene00012131		T28F3.5	4.72343e-06	1.23229	1.04775e-06	2.34939
WBGene00219644	linc-69	B0507.16	0.317692	1.23124	0.234907	2.34769
WBGene00012297		W06D4.3	0.0126134	1.23086	0.00573754	2.34707
WBGene00019508		K07H8.8	0.293491	1.23057	0.21304	2.3466
WBGene00007915		C34C6.2	2.64604e-16	1.22985	1.98525e-17	2.34542
WBGene00008137	sfxn-1.4	C47D12.3	0.000406729	1.22977	0.00012931	2.34529
WBGene00013437		Y66D12A.11	0.00113313	1.22893	0.000397445	2.34394
WBGene00194787		T16G1.13	0.147174	1.22746	0.0941401	2.34154
WBGene00022548		ZC196.4	0.00814206	1.22668	0.00351686	2.34028
WBGene00194952		ZK666.14	0.118995	1.22631	0.0734622	2.33967
WBGene00004509	rrf-2	M01G12.12	5.07567e-14	1.22603	4.57028e-15	2.33922
WBGene00015675		C10E2.5	0.0499336	1.22452	0.0270417	2.33678
WBGene00010728		K09G1.2	0.0626596	1.2234	0.0351015	2.33496
WBGene00022739	toe-1	ZK430.1	2.55118e-57	1.2217	2.74761e-59	2.33222
WBGene00009209		F28C6.10	0.00324038	1.22016	0.00126357	2.32973
WBGene00008545		F07A11.1	0.0109128	1.21993	0.0048747	2.32935
WBGene00019335		K02F6.1	0.0608342	1.21991	0.0339466	2.32933
WBGene00017650		F21A9.1	0.230684	1.21888	0.159925	2.32766
WBGene00021819		Y53G8B.3	0.0104004	1.21878	0.00462235	2.32749
WBGene00021586	clec-75	Y46C8AL.9	0.141329	1.21682	0.0897459	2.32434
WBGene00006710	ubc-15	Y110A2AR.2	2.04128e-15	1.21585	1.63298e-16	2.32278
WBGene00044763		ZK688.12	0.0401213	1.21562	0.02109	2.3224
WBGene00015230	tag-344	B0511.4	0.00202738	1.2111	0.000751201	2.31515
WBGene00016140	rpb-2	C26E6.4	2.80367e-41	1.21103	5.42936e-43	2.31503
WBGene00013310		Y57G11C.14	0.00161732	1.21081	0.000585771	2.31468
WBGene00010122		F55G11.1	0.0542649	1.20796	0.0297694	2.31011
WBGene00009155	lhfp-4	F26D10.11	0.0262186	1.20596	0.013038	2.30691
WBGene00020007		R11F4.1	8.10913e-33	1.20469	2.23796e-34	2.30488
WBGene00219950		F46A8.13	0.0061363	1.20466	0.00257043	2.30483
WBGene00016958	ilys-4	C55F2.2	1.11565e-09	1.2046	1.50655e-10	2.30474
WBGene00021828		Y54E10A.6	3.60861e-25	1.20291	1.55084e-26	2.30203
WBGene00001980	hmr-1	W02B9.1	8.32539e-25	1.20208	3.64691e-26	2.30071
WBGene00012499		Y24F12A.4	0.00106919	1.20056	0.000372803	2.29829
WBGene00011051	pfs-2	R06A4.9	1.15528e-36	1.20037	2.68587e-38	2.29799
WBGene00194678		R10D12.18	0.324355	1.199	0.240768	2.29581
WBGene00001402	fbf-2	F21H12.5	1.14102e-18	1.19826	7.24325e-20	2.29463
WBGene00012699		Y39B6A.41	9.97093e-07	1.19771	1.98613e-07	2.29375
WBGene00015828	math-14	C16C4.4	9.3643e-06	1.19721	2.19016e-06	2.29295
WBGene00013188	smg-9	Y54E2A.2	1.85521e-15	1.19567	1.48029e-16	2.29052
WBGene00022138	trpp-10	Y71G12A.2	1.53608e-34	1.19541	3.98476e-36	2.2901
WBGene00019994	cdh-1	R10F2.1	1.30329e-15	1.19129	1.02641e-16	2.28356
WBGene00009682	msd-2	F44D12.5	0.129886	1.19098	0.0812757	2.28308
WBGene00011562		T07C4.10	2.24262e-15	1.19054	1.79986e-16	2.28239
WBGene00007415		C07E3.4	0.0332431	1.18968	0.017051	2.28103
WBGene00016647	fbxc-4	C44C8.2	2.85557e-07	1.18799	5.29773e-08	2.27835
WBGene00077784		F35C8.9	0.13148	1.18748	0.0824635	2.27754
WBGene00015942	osta-2	C18A3.4	6.94835e-38	1.18641	1.54344e-39	2.27585
WBGene00044743	crb-3	C35B8.4	1.07356e-12	1.18535	1.08396e-13	2.27418
WBGene00175031		C06C3.12	0.060625	1.18433	0.0338047	2.27258
WBGene00044911		H38K22.6	0.138766	1.18375	0.0878379	2.27166
WBGene00009054		F22D6.9	1.37537e-18	1.18335	8.77366e-20	2.27103
WBGene00021595		Y46E12BL.2	6.38084e-11	1.1833	7.6122e-12	2.27096
WBGene00012656		Y39A1A.18	0.216696	1.17981	0.148644	2.26546
WBGene00021189		Y13C8A.2	0.161582	1.17941	0.104912	2.26484
WBGene00003827	ntl-4	C49H3.5	5.60887e-29	1.17598	1.96033e-30	2.25947
WBGene00017922		F29B9.7	0.068294	1.17437	0.0387529	2.25694
WBGene00020947		W02F12.2	4.11411e-13	1.17376	4.0027e-14	2.256
WBGene00003711	nhr-121	E02H9.8	4.03728e-15	1.17239	3.32799e-16	2.25385
WBGene00014772		F56D5.4	7.29061e-39	1.17214	1.57794e-40	2.25345
WBGene00010911		M106.3	7.15486e-48	1.17191	1.06324e-49	2.2531
WBGene00007478		C09F9.1	0.285021	1.17097	0.205756	2.25163
WBGene00022571		ZC239.13	0.0889386	1.16949	0.0523832	2.24932
WBGene00020526		T15B7.14	0.0048816	1.1693	0.00199201	2.24903
WBGene00007639		C17D12.5	0.0718759	1.16782	0.0411091	2.24672
WBGene00012784		Y43C5A.4	0.00202393	1.16616	0.000749816	2.24414
WBGene00012936		Y47D3A.29	1.68485e-29	1.15925	5.67055e-31	2.23341
WBGene00013621	clec-239	Y102A5C.16	0.51909	1.15907	0.427383	2.23314
WBGene00010831		M02G9.2	0.0053283	1.15849	0.00219693	2.23223
WBGene00198446		T25D10.6	0.581925	1.15726	0.492948	2.23034
WBGene00019564		K09D9.1	0.000265969	1.15721	8.12107e-05	2.23026
WBGene00014134		ZK896.3	0.000257134	1.15712	7.82997e-05	2.23011
WBGene00003182	mef-2	W10D5.1	4.28226e-14	1.15601	3.82483e-15	2.22841
WBGene00022143		Y71G12B.3	0.104198	1.15593	0.0628223	2.22828
WBGene00013935		ZK218.1	0.00013356	1.15338	3.84573e-05	2.22434
WBGene00012905		Y46G5A.14	0.121084	1.15254	0.0750466	2.22305
WBGene00010804		M01E5.1	0.511732	1.1519	0.419789	2.22207
WBGene00050890		F17C11.16	0.459436	1.15111	0.367257	2.22085
WBGene00196428		Y37E3.27	0.506416	1.15096	0.414641	2.22061
WBGene00006923	vhp-1	F08B1.1	1.0831e-50	1.15007	1.47494e-52	2.21925
WBGene00021411		Y38C9A.1	4.51806e-28	1.14941	1.64693e-29	2.21823
WBGene00009704		F44F4.9	0.297322	1.14814	0.216637	2.21628
WBGene00015359		C02G6.1	4.93668e-07	1.14705	9.43472e-08	2.21461
WBGene00018679		F52C12.2	7.18462e-30	1.14625	2.37714e-31	2.21337
WBGene00010963	nduo-4	MTCE.25	1.62314e-18	1.1429	1.03878e-19	2.20825
WBGene00202124		F22E12.13	1	1.14272	0.573866	2.20797
WBGene00003258	cogc-1	Y54E10A.2	8.19672e-53	1.14259	1.02284e-54	2.20776
WBGene00012955		Y47H9C.12	0.431918	1.14137	0.340605	2.2059
WBGene00023429		W08G11.6	0.312545	1.14046	0.230335	2.20451
WBGene00007399	clec-162	C07A9.1	0.33846	1.13991	0.253884	2.20367
WBGene00015499	inst-1	C06A5.1	8.28537e-28	1.13914	3.07167e-29	2.20249
WBGene00016666		C45E5.3	0.291124	1.13791	0.211021	2.20062
WBGene00044149		T24D5.6	0.146669	1.13777	0.0937366	2.20041
WBGene00006223	str-179	F36H5.7	0.345041	1.13641	0.259735	2.19834
WBGene00013775		Y116A8A.4	0.196493	1.13619	0.132314	2.19799
WBGene00013289	tag-273	Y57G11A.1	1.91993e-20	1.13402	1.08259e-21	2.1947
WBGene00206531		C29F7.11	0.549238	1.13373	0.458859	2.19425
WBGene00206494		C15H11.16	0.544456	1.13221	0.453709	2.19195
WBGene00020770	eat-17	T24D11.1	1.44306e-21	1.13188	7.56271e-23	2.19143
WBGene00044493		Y54G2A.50	1.31474e-19	1.12873	7.87634e-21	2.18665
WBGene00018326	cyp-25A5	F42A6.4	0.507099	1.12678	0.415279	2.18371
WBGene00016987		CC8.2	1.16444e-27	1.12651	4.36521e-29	2.1833
WBGene00006395	taf-11.3	F43D9.5	9.9133e-11	1.12527	1.20727e-11	2.18143
WBGene00007169		B0393.4	0.0252945	1.12303	0.0125156	2.17804
WBGene00008922		F17C11.11	1.53111e-13	1.11955	1.42702e-14	2.1728
WBGene00013886		ZC412.5	0.215114	1.11913	0.14731	2.17216
WBGene00018450		F45D11.3	0.157442	1.11901	0.101746	2.17198
WBGene00010035		F54C8.1	0.000962246	1.11883	0.000331178	2.17171
WBGene00007017	mdt-17	Y113G7B.18	3.1939e-46	1.1169	5.04395e-48	2.16881
WBGene00016567		C41D11.9	1.98976e-13	1.11485	1.87921e-14	2.16573
WBGene00018547	clec-78	F47C12.2	0.00613513	1.11317	0.00256962	2.16321
WBGene00012195	bath-34	W02A11.5	2.9496e-07	1.11198	5.47981e-08	2.16142
WBGene00019278		K01A2.3	0.0119452	1.10893	0.00539277	2.15686
WBGene00004179	prg-2	C01G5.2	0.000903546	1.10757	0.000309478	2.15483
WBGene00013988		ZK512.10	0.318347	1.10541	0.235517	2.1516
WBGene00006763	unc-26	JC8.10	3.16327e-23	1.10225	1.4954e-24	2.14689
WBGene00002957	let-858	F33A8.1	1.12826e-45	1.1017	1.81102e-47	2.14607
WBGene00000071	acy-4	T01C2.1	4.15679e-16	1.10153	3.16822e-17	2.14582
WBGene00003072	lrp-2	T21E3.3	3.83057e-17	1.10124	2.68158e-18	2.14539
WBGene00012337		W07G4.3	9.63598e-49	1.10119	1.39703e-50	2.14531
WBGene00021871	dml-1	Y54G2A.5	0.0513928	1.0998	0.0279783	2.14325
WBGene00013034	tat-1	Y49E10.11	8.98949e-43	1.09929	1.64308e-44	2.14249
WBGene00000530	clh-3	E04F6.11	1.46394e-28	1.09633	5.23782e-30	2.1381
WBGene00013235		Y56A3A.16	3.99423e-35	1.09479	9.96852e-37	2.13581
WBGene00019219		H20J04.4	4.16158e-21	1.09422	2.24531e-22	2.13497
WBGene00020276		T05H4.15	0.0100865	1.09198	0.00446484	2.13166
WBGene00021220		Y19D10A.5	0.0113668	1.09182	0.00510102	2.13143
WBGene00018600		F48C1.8	0.258794	1.09012	0.183513	2.12891
WBGene00007489		C09G5.7	0.00368034	1.08965	0.00145468	2.12822
WBGene00021485		Y40A1A.3	0.00347581	1.08887	0.00136635	2.12708
WBGene00021115		W09C3.8	0.266467	1.0885	0.190458	2.12652
WBGene00017607		F19F10.11	4.63043e-35	1.08776	1.16282e-36	2.12544
WBGene00012680		Y39B6A.21	1.32367e-05	1.08697	3.1685e-06	2.12427
WBGene00012895	cox-10	Y46G5A.2	7.39831e-14	1.08626	6.72678e-15	2.12323
WBGene00010306	golg-4	F59A2.6	2.652e-20	1.07913	1.51048e-21	2.11277
WBGene00001495	frm-9	F31B12.3	4.54722e-06	1.07759	1.00654e-06	2.11051
WBGene00020144		T01C8.3	0.0345052	1.07706	0.0177805	2.10974
WBGene00011697		T10H4.4	0.409299	1.07698	0.318769	2.10962
WBGene00019899		R05G6.5	0.0512849	1.07636	0.0279062	2.1087
WBGene00011153		R09A8.2	7.75184e-21	1.07551	4.24659e-22	2.10747
WBGene00017072		D2096.5	0.169745	1.07419	0.11135	2.10554
WBGene00021050		W05H9.3	8.33912e-15	1.07387	7.04246e-16	2.10507
WBGene00013545		Y75B8A.8	8.97589e-34	1.07038	2.38421e-35	2.09998
WBGene00016139	ntl-9	C26E6.3	8.3127e-30	1.07028	2.75469e-31	2.09984
WBGene00021448		Y39D8A.1	7.75716e-09	1.07003	1.15275e-09	2.09948
WBGene00017908		F28H1.1	1.43278e-14	1.06912	1.23744e-15	2.09816
WBGene00011492		T05F1.7	0.260757	1.06631	0.185323	2.09407
WBGene00000763	coq-3	Y57G11C.11	0.21374	1.06488	0.14623	2.092
WBGene00004187	prp-8	C50C3.6	5.82445e-31	1.06393	1.80346e-32	2.09061
WBGene00020102		R148.3	1.01872e-18	1.06263	6.42995e-20	2.08874
WBGene00012462		Y17G7B.8	2.33833e-13	1.06261	2.229e-14	2.08871
WBGene00016699	del-7	C46A5.2	0.155176	1.06258	0.100045	2.08866
WBGene00012450		Y17D7B.2	0.121892	1.06037	0.075612	2.08547
WBGene00022076	daao-1	Y69A2AR.5	3.72436e-06	1.06009	8.13023e-07	2.08506
WBGene00015788		C15B12.8	3.77849e-05	1.05921	9.78811e-06	2.08379
WBGene00021843		Y54E10BR.4	7.01238e-42	1.05836	1.32165e-43	2.08256
WBGene00006349	sur-2	F39B2.4	7.363e-16	1.05764	5.692e-17	2.08152
WBGene00194652		F15H9.8	0.106704	1.05763	0.0645868	2.08151
WBGene00013732	aakg-1	Y111B2A.8	9.11166e-21	1.05701	5.03871e-22	2.08061
WBGene00008099		C44H9.4	4.53313e-07	1.05553	8.60772e-08	2.07848
WBGene00004236	ptr-22	Y80D3A.7	0.00407568	1.05367	0.00162896	2.0758
WBGene00021820	nipa-1	Y53G8B.4	6.26161e-18	1.0517	4.16619e-19	2.07297
WBGene00017941		F31A9.2	0.239769	1.05077	0.167489	2.07164
WBGene00007255	cnnm-4	C01H6.6	4.44458e-11	1.05041	5.21944e-12	2.07113
WBGene00001564	icl-1	C05E4.9	1.21397e-37	1.04511	2.72802e-39	2.06352
WBGene00009377		F34D10.8	0.0280456	1.04293	0.0140845	2.06041
WBGene00012028	srz-99	T25E12.13	0.307238	1.04165	0.225453	2.05858
WBGene00001812	haf-2	F43E2.4	1.01838e-48	1.03843	1.48173e-50	2.05399
WBGene00021789	nol-6	Y51H7C.11	2.49108e-22	1.03795	1.24728e-23	2.05331
WBGene00013249		Y57A10A.4	2.51728e-09	1.03664	3.52443e-10	2.05145
WBGene00008995	prde-1	F21A3.5	1.05247e-16	1.03594	7.58034e-18	2.05045
WBGene00019357	cpg-8	K03B4.7	0.195642	1.03576	0.131661	2.0502
WBGene00013021		Y48G10A.4	1.65291e-25	1.03572	6.94953e-27	2.05013
WBGene00020878		T28A11.16	0.00386751	1.03494	0.00153595	2.04903
WBGene00021253		Y22D7AL.15	7.63092e-07	1.03434	1.49315e-07	2.04818
WBGene00013397		Y62H9A.9	0.490825	1.0342	0.398527	2.04798
WBGene00022428		Y104H12D.4	8.61029e-10	1.03395	1.15024e-10	2.04762
WBGene00015266		BE0003N10.1	5.60887e-29	1.0323	1.95949e-30	2.04528
WBGene00008685	mon-2	F11A10.4	2.33489e-34	1.03213	6.08113e-36	2.04503
WBGene00012663	hex-3	Y39A1C.4	2.25072e-23	1.03188	1.05934e-24	2.04469
WBGene00022843		ZK1055.2	0.204829	1.03078	0.138936	2.04312
WBGene00006044	ssp-16	T27A3.3	0.00978506	1.03008	0.0043157	2.04214
WBGene00002845	let-711	F57B9.2	4.41213e-16	1.02874	3.37198e-17	2.04024
WBGene00011604		T08A11.1	1.71541e-18	1.02793	1.09961e-19	2.03909
WBGene00010087		F55B11.5	0.137902	1.02701	0.0871912	2.03779
WBGene00009291	clec-264	F31D4.4	1.04537e-07	1.02666	1.82627e-08	2.0373
WBGene00012585	lips-15	Y38E10A.7	3.17588e-13	1.0248	3.06027e-14	2.03467
WBGene00021187		Y9D1A.2	0.0479469	1.02475	0.0258069	2.0346
WBGene00015267	chin-1	BE0003N10.2	4.74506e-29	1.02393	1.6486e-30	2.03346
WBGene00001811	haf-1	C30H6.6	1.46894e-06	1.02299	2.99903e-07	2.03212
WBGene00021754	hpo-29	Y50D7A.4	4.99431e-31	1.02054	1.53866e-32	2.02868
WBGene00195175		Y105E8A.36	1.07263e-09	1.02013	1.44402e-10	2.0281
WBGene00010684		K08F9.1	0.0772954	1.02003	0.0447051	2.02796
WBGene00002295	let-19	K08F8.6	1.73599e-09	1.01984	2.391e-10	2.02769
WBGene00011690		T10C6.9	0.382322	1.01877	0.293853	2.02619
WBGene00007049	tag-191	C53A5.4	0.0143102	1.01804	0.00661307	2.02517
WBGene00014220		ZK1098.3	2.74091e-13	1.01744	2.62695e-14	2.02433
WBGene00011152		R09A8.1	1.60961e-13	1.0168	1.50352e-14	2.02343
WBGene00010148		F56D5.3	0.000122672	1.01613	3.50237e-05	2.02249
WBGene00011190	swt-6	R10D12.9	3.85026e-05	1.01572	9.98998e-06	2.02192
WBGene00013252		Y57A10A.7	1.1133e-10	1.01418	1.3685e-11	2.01975
WBGene00019431		K06A5.3	0.0462645	1.01371	0.0247863	2.0191
WBGene00021500		Y40C7B.4	0.113566	1.01275	0.0695347	2.01776
WBGene00001510	fzr-1	ZK1307.6	4.34987e-19	1.01149	2.67799e-20	2.016
WBGene00011200		R10E4.3	0.0482126	1.01057	0.0259973	2.0147
WBGene00022030		Y65B4A.7	0.129182	1.00955	0.0807678	2.01328
WBGene00008728	sre-36	F13A7.13	0.332283	1.00921	0.248253	2.01281
WBGene00004152	pqn-70	T19B10.4	1.86686e-07	1.00809	3.39385e-08	2.01124
WBGene00003834	nxf-1	C15H11.3	3.94654e-26	1.00746	1.5939e-27	2.01037
WBGene00017673	icmt-1	F21F3.3	0.125559	1.00304	0.0781581	2.00422
WBGene00001609	glp-1	F02A9.6	1.32122e-62	1.00218	1.09457e-64	2.00303
WBGene00009614		F41D3.9	0.187294	1.00128	0.124987	2.00178
WBGene00235309		F21C10.17	0.313425	0.999602	0.231129	1.99945
WBGene00013132	strd-1	Y52D3.1	4.72196e-23	0.998385	2.25915e-24	1.99776
WBGene00004960	spe-6	Y66D12A.20	1.39355e-07	0.997485	2.47496e-08	1.99652
WBGene00014778		F58D12.2	0.498647	0.99732	0.406676	1.99629
WBGene00008441	usp-50	E01B7.1	5.93514e-23	0.996844	2.87953e-24	1.99563
WBGene00013529		Y73F8A.24	4.89702e-23	0.996626	2.35812e-24	1.99533
WBGene00000601	col-12	F15H10.1	0.0722902	0.996031	0.0413761	1.99451
WBGene00013131		Y52B11C.1	7.18631e-11	0.994972	8.61777e-12	1.99304
WBGene00017078		D2096.11	3.50884e-11	0.994499	4.07697e-12	1.99239
WBGene00021332		Y34D9A.7	7.10072e-19	0.992428	4.4414e-20	1.98953
WBGene00015190		B0432.9	7.92137e-05	0.992144	2.18409e-05	1.98914
WBGene00003671	nhr-81	C47F8.8	0.34955	0.991892	0.263724	1.98879
WBGene00008301	dct-3	C54D10.7	0.123775	0.991681	0.076913	1.9885
WBGene00007329		C05C10.2	1.15955e-39	0.991129	2.38359e-41	1.98774
WBGene00013061		Y51A2A.5	0.542789	0.989106	0.451982	1.98495
WBGene00015666	gad-2	C10A4.5	0.0456395	0.987745	0.024409	1.98308
WBGene00021605		Y46H3C.5	1.49392e-07	0.984294	2.66791e-08	1.97835
WBGene00004029	pik-1	K09B11.1	6.27594e-06	0.982805	1.42235e-06	1.9763
WBGene00006596	top-3	Y56A3A.27	1.95061e-24	0.981592	8.68598e-26	1.97464
WBGene00007564	mrps-22	C14A4.14	2.47683e-32	0.981559	7.04074e-34	1.9746
WBGene00007505	pezo-1	C10C5.1	1.88994e-20	0.980186	1.0647e-21	1.97272
WBGene00000223	atf-7	C07G2.2	1.09161e-53	0.979679	1.31025e-55	1.97203
WBGene00020030		R12E2.1	2.15261e-17	0.978697	1.48241e-18	1.97068
WBGene00013563		Y75B8A.33	0.272104	0.978479	0.195233	1.97039
WBGene00020172	thoc-1	T02H6.2	2.43469e-29	0.977239	8.28247e-31	1.96869
WBGene00044219		F28F8.10	0.0143183	0.975484	0.00661758	1.9663
WBGene00012627		Y38H6C.15	0.0314426	0.974143	0.0160086	1.96447
WBGene00022134		Y71G10AL.1	2.36215e-32	0.9738	6.69028e-34	1.96401
WBGene00003462	msp-74	F09C12.7	0.448733	0.973201	0.356724	1.96319
WBGene00200884		F25D1.10	0.364842	0.973109	0.277547	1.96307
WBGene00005262	srh-39	C06A8.7	0.390863	0.972847	0.301754	1.96271
WBGene00012468		Y17G7B.17	3.25897e-26	0.971866	1.30449e-27	1.96138
WBGene00003150	mbk-2	F49E11.1	4.45834e-37	0.970063	1.01803e-38	1.95893
WBGene00008210		C49F5.6	4.07425e-20	0.969567	2.35219e-21	1.95825
WBGene00044384		F11G11.14	0.180875	0.969021	0.119915	1.95751
WBGene00017789		F25E5.8	7.18664e-16	0.968185	5.55194e-17	1.95638
WBGene00014643		B0391.8	0.00148466	0.966218	0.000533271	1.95371
WBGene00011172		R09E10.2	0.0682157	0.966023	0.0387002	1.95345
WBGene00008781	rpoa-2	F14B4.3	2.32446e-29	0.965632	7.89543e-31	1.95292
WBGene00010964	ctc-1	MTCE.26	5.91722e-23	0.96545	2.86777e-24	1.95267
WBGene00019215		H20E11.3	0.000948591	0.964741	0.000326037	1.95171
WBGene00007577	nrde-1	C14B1.6	7.05819e-31	0.963752	2.20009e-32	1.95038
WBGene00012362		W09D10.4	4.45183e-28	0.963033	1.61818e-29	1.9494
WBGene00018795		F54C4.4	1.93518e-20	0.962393	1.09219e-21	1.94854
WBGene00015400	cyp-35A2	C03G6.15	9.01456e-18	0.961993	6.06323e-19	1.948
WBGene00018455	fbxc-42	F45D11.9	9.85818e-05	0.960309	2.76507e-05	1.94573
WBGene00013096	mcd-1	Y51H1A.6	4.95633e-27	0.959008	1.91447e-28	1.94397
WBGene00003020	lin-35	C32F10.2	2.55481e-36	0.95682	6.08509e-38	1.94103
WBGene00021522	nhr-274	Y41D4B.21	1.52206e-14	0.955837	1.31928e-15	1.9397
WBGene00020481		T13C2.6	6.07593e-33	0.95468	1.6674e-34	1.93815
WBGene00015015	math-1	B0047.4	0.479543	0.953991	0.387423	1.93722
WBGene00008534		F02H6.1	0.000848526	0.953147	0.000288832	1.93609
WBGene00016697	cyp-33C2	C45H4.17	0.0317955	0.953061	0.0162196	1.93598
WBGene00022059		Y67D8A.2	3.29684e-20	0.952608	1.89313e-21	1.93537
WBGene00011071		R06F6.8	2.47713e-16	0.950599	1.85211e-17	1.93267
WBGene00044486		Y54G2A.42	0.486268	0.950385	0.394027	1.93239
WBGene00020774		T24E12.5	0.00786985	0.948578	0.00338298	1.92997
WBGene00012252		W04E12.7	1.46644e-08	0.947584	2.26348e-09	1.92864
WBGene00013701		Y106G6D.4	0.00836086	0.946509	0.00362166	1.9272
WBGene00021613		Y47A7.1	5.58772e-24	0.946316	2.53448e-25	1.92695
WBGene00016457		C35E7.5	3.14189e-09	0.944816	4.45262e-10	1.92494
WBGene00009651		F43D2.2	2.19626e-14	0.944428	1.92755e-15	1.92443
WBGene00016894		C53B7.3	7.4494e-06	0.944352	1.71182e-06	1.92432
WBGene00009924	cfp-1	F52B11.1	0.0103387	0.943189	0.00459041	1.92277
WBGene00011269		R17.3	9.70521e-08	0.942175	1.68697e-08	1.92142
WBGene00006945	wars-1	Y80D3A.1	2.62888e-24	0.940755	1.1788e-25	1.91953
WBGene00012386	agef-1	Y6B3A.1	6.43374e-26	0.939226	2.62506e-27	1.9175
WBGene00045272		F59C12.4	3.40546e-05	0.937134	8.73716e-06	1.91472
WBGene00016789	djr-1.2	C49G7.11	0.578571	0.937077	0.489507	1.91464
WBGene00018932	mrpl-2	F56B3.8	1.63979e-25	0.936652	6.8859e-27	1.91408
WBGene00012735	sptf-3	Y40B1A.4	1.22971e-30	0.936106	3.8904e-32	1.91336
WBGene00018098		F36F12.7	0.455826	0.935324	0.363542	1.91232
WBGene00021831		Y54E10A.11	4.67608e-45	0.935163	7.72366e-47	1.91211
WBGene00015430		C04E7.3	0.000287556	0.934798	8.83528e-05	1.91162
WBGene00002248	lam-3	T22A3.8	6.77239e-08	0.932212	1.15369e-08	1.9082
WBGene00014871		Y37H9A.5	0.000483826	0.930691	0.000156348	1.90619
WBGene00001492	frm-5.1	Y38C1AB.8	7.73254e-11	0.927521	9.34421e-12	1.902
WBGene00003993	pgl-2	B0523.3	7.60311e-22	0.927416	3.90529e-23	1.90187
WBGene00021066		W06H8.2	0.00118953	0.925277	0.000419441	1.89905
WBGene00004510	rrf-3	F10B5.7	3.20227e-39	0.925142	6.79817e-41	1.89887
WBGene00007913	cyp-36A1	C34B7.3	1.04068e-09	0.92485	1.3994e-10	1.89849
WBGene00017512	nhr-179	F16B4.11	0.00129867	0.9234	0.000461627	1.89658
WBGene00001115	dyb-1	F47G6.1	8.93557e-09	0.922169	1.33805e-09	1.89496
WBGene00021830		Y54E10A.10	6.35668e-15	0.9221	5.32219e-16	1.89487
WBGene00206474		T22A3.12	0.115107	0.922087	0.0706566	1.89485
WBGene00000496	chs-1	T25G3.2	3.08614e-39	0.920987	6.53566e-41	1.89341
WBGene00022718		ZK370.4	2.62786e-16	0.919557	1.97025e-17	1.89153
WBGene00017001		D1007.3	0.0101023	0.917941	0.00447235	1.88942
WBGene00003678	nhr-88	K08A2.5	1.33318e-18	0.917747	8.49761e-20	1.88916
WBGene00006650	tts-1	F09E10.11	0.0358535	0.917274	0.0185719	1.88854
WBGene00021351		Y37E3.10	9.11788e-06	0.91694	2.1278e-06	1.88811
WBGene00000707	col-133	F52B11.4	0.283043	0.915558	0.204123	1.8863
WBGene00007898		C33D9.3	8.0384e-06	0.914797	1.85799e-06	1.8853
WBGene00002153	iars-2	C25A1.7	6.15343e-40	0.914162	1.24897e-41	1.88447
WBGene00013763		Y113G7B.14	6.73267e-06	0.913016	1.53318e-06	1.88298
WBGene00018322		F41H10.12	0.65405	0.910493	0.570097	1.87969
WBGene00016627		C44B7.5	3.57946e-15	0.910491	2.93763e-16	1.87969
WBGene00044917		F40F8.12	0.573298	0.908909	0.48374	1.87763
WBGene00011601	zim-3	T07G12.11	3.30005e-23	0.907928	1.56177e-24	1.87635
WBGene00012326		W07E11.1	6.30208e-32	0.907731	1.83388e-33	1.87609
WBGene00016913	lam-2	C54D1.5	6.35564e-10	0.907606	8.38841e-11	1.87593
WBGene00003574	ncx-9	C13D9.8	0.0763242	0.907138	0.0440663	1.87532
WBGene00021685	herc-1	Y48G8AL.1	2.09801e-22	0.906904	1.0483e-23	1.87502
WBGene00010999		R03G8.4	0.239107	0.906518	0.166977	1.87452
WBGene00044912		H38K22.7	0.295268	0.905222	0.214667	1.87283
WBGene00015818		C16A11.5	7.5428e-16	0.904331	5.83881e-17	1.87168
WBGene00010425	lpin-1	H37A05.1	4.45708e-19	0.903718	2.74861e-20	1.87088
WBGene00018358		F42G8.7	0.034377	0.902737	0.0177024	1.86961
WBGene00022615		ZC449.5	8.11712e-09	0.902538	1.21002e-09	1.86935
WBGene00011351		T01H3.5	0.0257135	0.899635	0.0127536	1.86559
WBGene00015635		C09D4.4	7.17651e-19	0.899248	4.49252e-20	1.86509
WBGene00002080	xpo-3	C49H3.10	1.7747e-16	0.897591	1.31405e-17	1.86295
WBGene00000968	dhs-4	T05F1.10	0.000132955	0.897293	3.82489e-05	1.86257
WBGene00017796		F25G6.1	8.66857e-05	0.897042	2.40941e-05	1.86224
WBGene00017454	irld-5	F14D2.6	0.51465	0.893004	0.422928	1.85704
WBGene00017487		F15E6.6	3.99677e-08	0.892821	6.57057e-09	1.8568
WBGene00044169		C06C3.10	0.124454	0.892732	0.0773865	1.85669
WBGene00001399	fat-7	F10D2.9	4.9615e-06	0.892471	1.10544e-06	1.85635
WBGene00007215	oxa-1	C01A2.3	2.79986e-20	0.892466	1.6005e-21	1.85635
WBGene00020993		W03F8.3	1.39424e-14	0.892369	1.20199e-15	1.85622
WBGene00019300	swt-1	K02D7.5	2.45716e-08	0.891872	3.91608e-09	1.85558
WBGene00013808	sfa-1	Y116A8C.32	3.0684e-22	0.891631	1.54429e-23	1.85527
WBGene00019241		H24K24.4	9.32769e-22	0.889283	4.81526e-23	1.85226
WBGene00019862	nrde-3	R04A9.2	9.92557e-17	0.888562	7.1231e-18	1.85133
WBGene00014729		E03H4.9	0.48231	0.88739	0.390108	1.84983
WBGene00022629		ZC513.5	5.25865e-27	0.887284	2.03942e-28	1.84969
WBGene00020729		T23E1.2	5.35971e-05	0.885262	1.42755e-05	1.8471
WBGene00012896	snrp-200	Y46G5A.4	1.25603e-15	0.88474	9.87241e-17	1.84643
WBGene00012121		T28C6.7	5.16746e-20	0.884674	3.00742e-21	1.84635
WBGene00001431	fkb-6	F31D4.3	2.21952e-51	0.879418	2.91905e-53	1.83963
WBGene00022547		ZC196.3	0.262994	0.878441	0.187199	1.83839
WBGene00009729		F45E10.2	2.25271e-06	0.877035	4.7415e-07	1.8366
WBGene00017441		F13H8.8	0.00810306	0.876789	0.00349624	1.83628
WBGene00021510	frpr-19	Y41D4A.8	0.000173896	0.876582	5.12784e-05	1.83602
WBGene00003965	pdk-1	H42K12.1	1.17746e-14	0.876289	1.00718e-15	1.83565
WBGene00023345		T12B5.9	0.154801	0.875491	0.0997753	1.83463
WBGene00022741		ZK430.5	0.101665	0.873968	0.0609844	1.8327
WBGene00014751		F36G9.4	0.264454	0.87382	0.188575	1.83251
WBGene00012451		Y17D7B.3	0.421769	0.872723	0.330702	1.83112
WBGene00044070	set-18	T22A3.4	2.82243e-13	0.870056	2.71092e-14	1.82773
WBGene00020677		T22B11.3	0.0611182	0.867347	0.0341304	1.82431
WBGene00013212		Y54G11A.1	1.95542e-21	0.866443	1.03274e-22	1.82316
WBGene00012907	cpt-1	Y46G5A.17	2.75689e-25	0.866041	1.18052e-26	1.82265
WBGene00194956		F37H8.7	0.136945	0.86465	0.0865152	1.8209
WBGene00004095	pqe-1	F52C9.8	4.85317e-19	0.864319	3.01046e-20	1.82048
WBGene00003801	npp-15	C29E4.4	3.45117e-32	0.864257	9.84619e-34	1.8204
WBGene00011705		T11A5.6	0.00376973	0.862865	0.0014938	1.81865
WBGene00045316		C49F5.9	0.00653786	0.862643	0.00275759	1.81837
WBGene00000548	clr-1	F56D1.4	3.38569e-16	0.862117	2.56298e-17	1.8177
WBGene00206377		F44E5.15	0.447568	0.860961	0.355542	1.81625
WBGene00007372		C06B8.7	3.13994e-09	0.860765	4.44823e-10	1.816
WBGene00016317		C32D5.10	5.1611e-27	0.859821	1.99892e-28	1.81481
WBGene00020798		T25D3.4	1.42572e-25	0.859614	5.95742e-27	1.81455
WBGene00012151		VH15N14R.1	0.00729263	0.859166	0.00311257	1.81399
WBGene00000379	cct-4	K01C8.10	5.88132e-44	0.858698	1.0293e-45	1.8134
WBGene00011209		R10E8.3	0.00541909	0.854871	0.00223829	1.8086
WBGene00009047		F22B8.4	0.00108116	0.854085	0.0003772	1.80761
WBGene00011061	wago-1	R06C7.1	1.09666e-41	0.85091	2.07828e-43	1.80364
WBGene00016935	ifta-1	C54G7.4	0.00123534	0.850396	0.000437022	1.803
WBGene00001880	his-6	F45F2.13	0.0430404	0.850375	0.0228406	1.80297
WBGene00017190		F07B7.12	0.120186	0.849335	0.0743716	1.80167
WBGene00010593	gsnl-1	K06A4.3	7.34339e-10	0.847019	9.7415e-11	1.79878
WBGene00004112	pqn-22	C46G7.4	4.34033e-12	0.846929	4.64081e-13	1.79867
WBGene00019326		K02F3.2	3.23016e-16	0.846839	2.44357e-17	1.79856
WBGene00018083		F36A4.4	0.145567	0.846329	0.0928814	1.79792
WBGene00022569		ZC239.6	1.95429e-05	0.846211	4.81261e-06	1.79777
WBGene00003954	pcm-1	C10F3.5	2.18772e-06	0.846048	4.59905e-07	1.79757
WBGene00010809		M01F1.3	5.52252e-21	0.843746	2.99674e-22	1.7947
WBGene00017707		F22E5.8	0.143378	0.843742	0.0912474	1.7947
WBGene00045212		Y110A7A.21	0.0108055	0.842834	0.00481892	1.79357
WBGene00007731		C25G4.3	7.13549e-09	0.842569	1.05593e-09	1.79324
WBGene00009065		F22G12.5	1.07899e-11	0.837379	1.19615e-12	1.7868
WBGene00003515	myo-3	K12F2.1	3.1319e-06	0.836814	6.74933e-07	1.7861
WBGene00012448	cyp-33D3	Y17D7A.4	0.260291	0.836193	0.184925	1.78533
WBGene00219780		B0228.10	0.33846	0.83478	0.253867	1.78358
WBGene00019600	rga-3	K09H11.3	3.12529e-15	0.834083	2.5471e-16	1.78272
WBGene00004729	sax-3	ZK377.2	1.87e-13	0.832984	1.75836e-14	1.78137
WBGene00017779	gtr-1	F25E2.1	0.0958177	0.832712	0.0569939	1.78103
WBGene00016957	atic-1	C55F2.1	8.48919e-08	0.831171	1.46549e-08	1.77913
WBGene00007147		B0334.9	0.187294	0.83039	0.125005	1.77817
WBGene00008317		C54G4.7	7.59377e-22	0.828793	3.89656e-23	1.7762
WBGene00008081	athp-1	C44B9.4	4.75097e-28	0.828778	1.73921e-29	1.77618
WBGene00016350		C33E10.10	1	0.828664	0.642863	1.77604
WBGene00018862	wago-2	F55A12.1	1.83948e-36	0.828397	4.32415e-38	1.77571
WBGene00021898		Y54G2A.36	4.87065e-05	0.826924	1.28821e-05	1.7739
WBGene00000024	abu-1	AC3.3	0.00455606	0.823674	0.00184715	1.76991
WBGene00008117	gsr-1	C46F11.2	2.57537e-34	0.823542	6.73414e-36	1.76975
WBGene00003163	mdl-1	R03E9.1	4.1773e-11	0.821005	4.89042e-12	1.76664
WBGene00019331	dos-3	K02F3.8	0.380012	0.820817	0.291625	1.76641
WBGene00003929	pat-2	F54F2.1	1.83142e-14	0.820539	1.6007e-15	1.76607
WBGene00003233	mgl-2	F45H11.4	0.000452619	0.819543	0.000145397	1.76485
WBGene00044142		H13N06.7	0.536691	0.818932	0.445432	1.7641
WBGene00003074	lars-2	ZK524.3	1.95124e-18	0.818597	1.25583e-19	1.76369
WBGene00012767	fcd-2	Y41E3.9	3.70492e-19	0.81767	2.26558e-20	1.76256
WBGene00017373		F10G7.10	9.04876e-12	0.81762	9.93756e-13	1.7625
WBGene00020564		T19C3.6	0.213577	0.814639	0.146097	1.75886
WBGene00007885	ugt-21	C33A12.6	7.67528e-05	0.814544	2.10869e-05	1.75874
WBGene00195056		C45E1.5	0.483671	0.814093	0.391459	1.75819
WBGene00019152	nspb-6	H04M03.2	0.0868397	0.81318	0.0509716	1.75708
WBGene00003558	nca-2	C27F2.2	0.0409763	0.813151	0.0215932	1.75704
WBGene00010863		M04D8.5	1	0.812877	0.649393	1.75671
WBGene00044438		Y51F10.11	3.64602e-08	0.812376	5.9694e-09	1.7561
WBGene00008389		D1086.2	0.0405589	0.811798	0.0213411	1.7554
WBGene00022813		ZK742.3	5.0387e-08	0.811462	8.4061e-09	1.75499
WBGene00005526	sri-14	M01G12.1	0.616324	0.811443	0.529075	1.75497
WBGene00022534	syx-16	ZC155.7	1.7268e-24	0.811224	7.67147e-26	1.7547
WBGene00021654		Y47G7B.2	0.0357263	0.811213	0.0184949	1.75469
WBGene00004322	rcq-5	E03A3.2	3.76446e-19	0.810753	2.30394e-20	1.75413
WBGene00195026		F39E9.19	0.0010219	0.810702	0.000354301	1.75406
WBGene00004874	smc-4	F35G12.8	3.65399e-32	0.810647	1.04438e-33	1.754
WBGene00000793	crh-1	Y41C4A.4	5.4279e-20	0.808099	3.16461e-21	1.7509
WBGene00015551		C06G3.5	2.45733e-17	0.806926	1.69607e-18	1.74948
WBGene00008969		F20C5.4	8.36864e-05	0.806659	2.32041e-05	1.74916
WBGene00185067		Y54G11A.17	1.86387e-08	0.806321	2.91938e-09	1.74875
WBGene00009428		F35E12.4	0.0162098	0.804436	0.00760426	1.74646
WBGene00017243		F08C6.5	0.0697943	0.804262	0.0397452	1.74625
WBGene00005058	sra-32	B0304.5	0.585203	0.803422	0.496724	1.74524
WBGene00016603	met-1	C43E11.3	1.03345e-11	0.800702	1.14299e-12	1.74195
WBGene00009724		F45D3.4	0.0439537	0.800665	0.0234049	1.7419
WBGene00012524		Y32B12B.4	2.45879e-19	0.800164	1.48829e-20	1.7413
WBGene00020808	clik-1	T25F10.6	6.03018e-08	0.798458	1.02101e-08	1.73924
WBGene00022021		Y61A9LA.10	2.02952e-24	0.79746	9.05837e-26	1.73804
WBGene00021262	fbxa-74	Y22D7AR.9	8.87226e-05	0.796796	2.47199e-05	1.73724
WBGene00008598	spin-3	F09A5.1	0.00123751	0.796151	0.000437963	1.73646
WBGene00009459		F36A2.12	0.13097	0.796137	0.0820349	1.73645
WBGene00019116	nhr-143	F59E11.11	0.000114111	0.795966	3.23844e-05	1.73624
WBGene00000912	daf-16	R13H8.1	5.91673e-14	0.794966	5.3613e-15	1.73504
WBGene00008695		F11C3.1	0.0241693	0.794823	0.0118675	1.73486
WBGene00018777		F53H1.3	1.91758e-16	0.793774	1.42183e-17	1.7336
WBGene00004873	smc-3	Y47D3A.26	4.96824e-25	0.793667	2.15831e-26	1.73347
WBGene00021198		Y17G9B.1	0.17404	0.793073	0.114545	1.73276
WBGene00044618	bus-2	K08D12.5	0.0787124	0.792327	0.0456306	1.73187
WBGene00010434		H40L08.3	0.00719342	0.791827	0.00306464	1.73127
WBGene00008091		C44F1.1	0.000321836	0.791317	9.99852e-05	1.73065
WBGene00006130	str-68	Y73C8C.6	0.666489	0.791065	0.584321	1.73035
WBGene00005488	srh-283	C47A10.2	0.670145	0.790981	0.588315	1.73025
WBGene00021009	afd-1	W03F11.6	8.82018e-14	0.790798	8.07439e-15	1.73003
WBGene00022805	nhr-256	ZK697.2	7.34981e-09	0.790268	1.08955e-09	1.7294
WBGene00013425	ceh-91	Y66A7A.5	6.07551e-15	0.787688	5.0742e-16	1.72631
WBGene00021691		Y48G8AL.13	3.66389e-09	0.787382	5.22654e-10	1.72594
WBGene00011099	nhr-208	R07B7.15	0.214643	0.786684	0.146903	1.7251
WBGene00011243		R11D1.2	0.627364	0.78619	0.541281	1.72451
WBGene00003700	nhr-110	Y46H3D.5	0.000822647	0.786132	0.000278915	1.72445
WBGene00020315		T07E3.4	2.40657e-12	0.785478	2.49342e-13	1.72366
WBGene00001432	fkb-7	B0511.1	0.00548747	0.785424	0.00226966	1.7236
WBGene00206362		B0041.11	0.0104275	0.784964	0.00463793	1.72305
WBGene00019565	cyp-35A3	K09D9.2	0.0872601	0.784301	0.051241	1.72226
WBGene00013540		Y75B8A.3	4.48074e-10	0.783637	5.84425e-11	1.72147
WBGene00003858	ogt-1	K04G7.3	7.92015e-17	0.783315	5.6511e-18	1.72108
WBGene00022350		Y82E9BR.18	6.57632e-17	0.78311	4.67183e-18	1.72084
WBGene00012726		Y39G8B.5	0.16414	0.783044	0.106993	1.72076
WBGene00000020	abt-2	F12B6.1	1.43865e-06	0.782058	2.93347e-07	1.71958
WBGene00009974		F53C11.4	5.23373e-10	0.781965	6.85889e-11	1.71947
WBGene00021607		Y46H3C.7	0.000592784	0.780722	0.00019518	1.71799
WBGene00022633		ZC581.3	9.04751e-09	0.779537	1.35621e-09	1.71658
WBGene00195057		B0261.9	0.649953	0.77859	0.565718	1.71545
WBGene00016824		C50E3.13	2.5759e-09	0.777696	3.61317e-10	1.71439
WBGene00019274		H43I07.1	1.2784e-15	0.777316	1.00548e-16	1.71394
WBGene00006789	unc-54	F11C3.3	1.81452e-07	0.777199	3.29307e-08	1.7138
WBGene00008332		C55A6.3	0.00213541	0.776536	0.000794657	1.71301
WBGene00006784	unc-49	T21C12.1	0.00912905	0.776482	0.00399659	1.71295
WBGene00022015		Y61A9LA.3	1.14812e-21	0.77641	5.96856e-23	1.71286
WBGene00086554		D1081.12	0.208816	0.775952	0.142215	1.71232
WBGene00008340		C55A6.11	0.295391	0.775932	0.214772	1.7123
WBGene00017648	ddo-3	F20H11.5	2.85355e-16	0.774606	2.14537e-17	1.71072
WBGene00013679		Y105E8A.21	6.24908e-28	0.774035	2.31028e-29	1.71005
WBGene00000876	cyl-1	C52E4.6	2.10709e-07	0.773903	3.85568e-08	1.70989
WBGene00003884	osm-3	M02B7.3	0.0143641	0.773175	0.00664247	1.70903
WBGene00044514		R09E12.9	0.228095	0.772648	0.157835	1.7084
WBGene00008502	skih-2	F01G4.3	1.36042e-16	0.772037	9.95327e-18	1.70768
WBGene00014673		C08H9.9	0.518063	0.771213	0.426403	1.7067
WBGene00001187	egl-19	C48A7.1	1.32241e-05	0.771197	3.16411e-06	1.70669
WBGene00012105		T27F6.6	5.04903e-16	0.769486	3.87181e-17	1.70466
WBGene00022800		ZK688.5	1.14142e-25	0.76936	4.75764e-27	1.70451
WBGene00200308		C56C10.15	0.450457	0.768459	0.358537	1.70345
WBGene00003799	npp-13	Y37E3.15	9.08008e-24	0.767841	4.18907e-25	1.70272
WBGene00010732		K10C3.5	3.90109e-16	0.767511	2.96728e-17	1.70233
WBGene00023418		R06F6.12	3.53626e-15	0.767307	2.89852e-16	1.70209
WBGene00013251		Y57A10A.6	0.000161827	0.767071	4.73506e-05	1.70181
WBGene00011216	usp-46	R10E11.3	1.08734e-10	0.767046	1.33377e-11	1.70178
WBGene00138725		C34E11.7	0.452369	0.766695	0.360363	1.70137
WBGene00045063		Y37A1A.4	0.119502	0.765642	0.0738247	1.70013
WBGene00014811		M162.9	0.00161732	0.765457	0.000585719	1.69991
WBGene00020453	fbxa-55	T12B5.6	0.0102493	0.762717	0.00454541	1.69668
WBGene00000113	alh-7	F45H10.1	7.83027e-11	0.762474	9.47109e-12	1.6964
WBGene00009495	hrg-6	F36H1.10	0.474886	0.760621	0.382776	1.69422
WBGene00001707	grh-1	Y48G8AR.1	0.0134523	0.759857	0.00616228	1.69332
WBGene00206465		F57A8.10	0.131321	0.758943	0.0822961	1.69225
WBGene00001910		C50F4.6	4.0483e-12	0.758366	4.31808e-13	1.69157
WBGene00020376		T09B4.2	1.50256e-14	0.758268	1.30004e-15	1.69146
WBGene00012733		Y40B1A.2	0.0516812	0.758237	0.0281834	1.69142
WBGene00011313		T01B7.8	0.478909	0.756624	0.386763	1.68953
WBGene00014938	mdt-9	Y62E10A.11	0.0136123	0.755219	0.0062447	1.68789
WBGene00020861		T27E4.1	0.280353	0.755054	0.201922	1.6877
WBGene00001081	dpy-22	F47A4.2	7.76486e-07	0.754887	1.52137e-07	1.6875
WBGene00235316		B0222.15	0.670314	0.753899	0.588753	1.68634
WBGene00005022	sqv-4	F29F11.1	6.82313e-24	0.753752	3.1337e-25	1.68617
WBGene00002231	knl-1	C02F5.1	1.99174e-23	0.753721	9.34352e-25	1.68614
WBGene00012140		T28F4.5	2.32399e-09	0.752779	3.24297e-10	1.68504
WBGene00010928	clec-258	M162.2	0.470592	0.752737	0.378435	1.68499
WBGene00011543	acl-2	T06E8.1	9.61363e-18	0.752712	6.47612e-19	1.68496
WBGene00002251	lat-1	B0457.1	3.84074e-22	0.749831	1.9509e-23	1.6816
WBGene00008897		F16H6.7	0.0774581	0.749635	0.0448192	1.68137
WBGene00006369	sym-4	R03E1.1	2.9751e-14	0.74954	2.6342e-15	1.68126
WBGene00005015	spt-5	K08E4.1	1.3857e-17	0.748919	9.45658e-19	1.68053
WBGene00019001	ipgm-1	F57B10.3	9.79722e-26	0.748748	4.05322e-27	1.68033
WBGene00004760	sel-2	F10F2.1	2.10097e-18	0.748171	1.35873e-19	1.67966
WBGene00013435		Y66D12A.9	1.16586e-13	0.748022	1.07814e-14	1.67949
WBGene00020284	mel-46	T06A10.1	5.05572e-13	0.747955	4.95284e-14	1.67941
WBGene00012975		Y48A6C.2	0.0271139	0.747348	0.0135493	1.6787
WBGene00019009	clec-90	F57C9.2	0.000926011	0.747186	0.000317701	1.67852
WBGene00009220		F28D9.4	1.68677e-07	0.746607	3.04375e-08	1.67784
WBGene00019200		H14E04.3	0.164826	0.74434	0.107551	1.67521
WBGene00007965		C36A4.4	5.70422e-30	0.743471	1.86961e-31	1.6742
WBGene00022867		ZK1240.2	0.00116213	0.743048	0.000408758	1.67371
WBGene00011606		T08D2.1	0.0537229	0.742474	0.0294415	1.67304
WBGene00011122	cpt-2	R07H5.2	8.10505e-21	0.741152	4.46107e-22	1.67151
WBGene00003738	nid-1	F54F3.1	9.03067e-09	0.74019	1.35322e-09	1.6704
WBGene00012369		W09G3.6	6.25917e-19	0.738521	3.90205e-20	1.66846
WBGene00012543	nkcc-1	Y37A1C.1	1.33586e-12	0.73503	1.3564e-13	1.66443
WBGene00019133		F59H6.2	0.0687548	0.734787	0.0390713	1.66415
WBGene00006571	tim-1	Y75B8A.22	1.35937e-17	0.734747	9.25578e-19	1.66411
WBGene00014801		K08E5.1	0.111033	0.734573	0.0676386	1.66391
WBGene00013367		Y60A3A.23	0.48721	0.733752	0.395005	1.66296
WBGene00016646	fbxc-5	C44C8.1	0.00115748	0.73252	0.000406884	1.66154
WBGene00016649	fbxc-1	C44C8.4	0.00115748	0.73252	0.000406884	1.66154
WBGene00001749	gst-1	R107.7	4.01313e-29	0.73223	1.38183e-30	1.6612
WBGene00013555	fbxa-89	Y75B8A.21	0.319393	0.732021	0.236374	1.66096
WBGene00004997	spp-12	T22G5.7	0.646414	0.732006	0.561868	1.66095
WBGene00002004	hsf-1	Y53C10A.12	3.47414e-21	0.731394	1.86542e-22	1.66024
WBGene00009771		F46B6.6	9.22843e-24	0.731029	4.26707e-25	1.65982
WBGene00003136	mau-2	C09H6.3	1.30151e-19	0.730732	7.7903e-21	1.65948
WBGene00020380		T09B4.6	0.576169	0.73015	0.486669	1.65881
WBGene00003589	nex-2	T07C4.9	4.43032e-13	0.729994	4.32181e-14	1.65863
WBGene00220259		ZK418.13	0.0305827	0.729844	0.0155228	1.65846
WBGene00020016	lipl-3	R11G11.14	0.0506511	0.728832	0.0274879	1.6573
WBGene00018585		F48A11.4	1.53032e-15	0.728823	1.21234e-16	1.65729
WBGene00000497	chs-2	F48A11.1	0.00901678	0.728801	0.0039395	1.65726
WBGene00002095	ins-12	C17C3.19	0.543728	0.728266	0.452961	1.65665
WBGene00016752		C48E7.7	0.328509	0.728189	0.244685	1.65656
WBGene00012868	tbc-9	Y45F10A.6	5.88367e-21	0.727382	3.20185e-22	1.65563
WBGene00016189		C28G1.4	0.0591709	0.726282	0.0328714	1.65437
WBGene00016342		C33C12.10	7.14937e-06	0.726199	1.63584e-06	1.65427
WBGene00010840		M03C11.3	4.65424e-14	0.724782	4.18117e-15	1.65265
WBGene00016367	nhr-162	C33G8.10	0.0277176	0.724093	0.0138882	1.65186
WBGene00185089		C16A11.10	8.77736e-05	0.723512	2.44237e-05	1.6512
WBGene00194847		F19C6.8	0.218586	0.723481	0.150146	1.65116
WBGene00018310		F41G4.7	0.0418151	0.723261	0.0221012	1.65091
WBGene00044963		K07C5.11	1	0.72286	0.71019	1.65045
WBGene00019584	set-12	K09F5.5	0.00810563	0.722616	0.00349818	1.65017
WBGene00044008	gip-2	C45G3.5	2.6391e-12	0.72011	2.74664e-13	1.64731
WBGene00000752	col-179	C34F6.3	0.0418151	0.720068	0.0221016	1.64726
WBGene00022677		ZK180.3	5.23373e-11	0.71952	6.20308e-12	1.64663
WBGene00017504		F16B4.2	0.0289938	0.719142	0.0146012	1.6462
WBGene00010125	dod-22	F55G11.5	0.0141929	0.718994	0.00654784	1.64603
WBGene00012971		Y48A6B.10	0.000106247	0.718978	2.99823e-05	1.64602
WBGene00007975	gls-1	C36B1.8	4.09386e-08	0.718717	6.74715e-09	1.64572
WBGene00012930	obr-1	Y47D3A.17	4.51024e-22	0.718589	2.29564e-23	1.64557
WBGene00015694	ugt-27	C10H11.5	0.2272	0.7181	0.157121	1.64501
WBGene00019589		K09F6.6	0.00063927	0.718092	0.000211976	1.64501
WBGene00003716	nhr-126	F44C8.10	0.00170943	0.715245	0.000621973	1.64176
WBGene00009162		F26E4.7	1.73265e-05	0.714274	4.22824e-06	1.64066
WBGene00006803	unc-70	K11C4.3	3.58069e-09	0.712537	5.1023e-10	1.63868
WBGene00000256	bli-6	Y73B6BL.34	0.371322	0.712068	0.283418	1.63815
WBGene00018781		F54A3.2	8.36122e-11	0.711306	1.01306e-11	1.63729
WBGene00008447		E01G4.5	0.000226284	0.710643	6.81911e-05	1.63653
WBGene00006487	tag-141	C30H6.2	0.190355	0.709702	0.127482	1.63547
WBGene00018355	ceh-86	F42G2.6	0.000353109	0.707365	0.000110615	1.63282
WBGene00020075	math-35	R52.3	0.00018542	0.7073	5.49357e-05	1.63275
WBGene00013381	cyp-31A5	Y62E10A.15	8.15322e-15	0.706309	6.87702e-16	1.63162
WBGene00206376		F47E1.17	0.427095	0.706149	0.335807	1.63144
WBGene00006437	mrck-1	K08B12.5	1.07787e-08	0.705393	1.63433e-09	1.63059
WBGene00001487	frk-1	T04B2.2	0.471423	0.705247	0.379372	1.63042
WBGene00003068	lrk-1	T27C10.6	6.53428e-10	0.704979	8.64448e-11	1.63012
WBGene00197454		T04H1.11	0.660483	0.704243	0.577684	1.62929
WBGene00020109		R151.6	9.69737e-13	0.703874	9.75612e-14	1.62887
WBGene00020020		R12B2.6	0.52901	0.703771	0.437523	1.62876
WBGene00011948		T23F1.5	0.481354	0.703644	0.389185	1.62861
WBGene00019118		F59E12.1	2.81225e-25	0.70355	1.20569e-26	1.62851
WBGene00010845		M03C11.8	2.62217e-12	0.702547	2.72252e-13	1.62737
WBGene00044241		C53D6.11	0.0985005	0.701269	0.0588616	1.62593
WBGene00015972		C18E3.3	7.28203e-07	0.701085	1.42149e-07	1.62573
WBGene00007721		C25D7.12	0.0233774	0.70037	0.0114254	1.62492
WBGene00022233	ipla-6	Y73B6BL.4	1.16524e-13	0.699525	1.07697e-14	1.62397
WBGene00010540		K03H1.5	4.25505e-08	0.699288	7.03042e-09	1.6237
WBGene00022128		Y71F9B.6	1.20101e-07	0.699196	2.10999e-08	1.6236
WBGene00008430	hgap-2	D2085.5	1.47845e-10	0.698115	1.83496e-11	1.62238
WBGene00022571		ZC239.13	0.15526	0.697879	0.100128	1.62212
WBGene00019301		K02D10.1	1.18555e-16	0.697683	8.5879e-18	1.6219
WBGene00219210		Y37H2A.18	0.0116837	0.697354	0.00525838	1.62153
WBGene00002001	hars-1	T11G6.1	6.17826e-21	0.697174	3.36857e-22	1.62133
WBGene00016695		C45H4.14	0.0235839	0.696999	0.0115386	1.62113
WBGene00012467	arrd-8	Y17G7B.14	0.494814	0.696987	0.402707	1.62112
WBGene00235095		B0035.21	0.628866	0.696768	0.54327	1.62087
WBGene00044067	hke-4.1	T28F3.3	1.77558e-15	0.694644	1.41307e-16	1.61849
WBGene00008364	slc-25A26	D1046.3	1.02163e-11	0.694453	1.12833e-12	1.61827
WBGene00219666	linc-31	D1014.12	0.528528	0.693974	0.436905	1.61773
WBGene00010637		K07F5.12	1.37189e-08	0.693875	2.10901e-09	1.61762
WBGene00194659	linc-1	W09C5.11	0.477481	0.693541	0.385164	1.61725
WBGene00001663	gpa-1	T19C4.6	0.20898	0.692784	0.142357	1.6164
WBGene00004802	sir-2.3	F46G10.3	0.0510781	0.6922	0.0277725	1.61575
WBGene00015481		C05D11.1	3.26395e-21	0.690801	1.74749e-22	1.61418
WBGene00021074		W07E6.2	5.3392e-16	0.689698	4.09708e-17	1.61295
WBGene00006674	twk-21	T01B4.1	0.170437	0.68911	0.111892	1.61229
WBGene00044166		C54C6.7	0.0163056	0.687834	0.00765342	1.61086
WBGene00015896		C17C3.15	0.0161891	0.68762	0.00759286	1.61062
WBGene00001617	glr-6	F41B4.4	0.00264753	0.687382	0.00100936	1.61036
WBGene00012113		T28B8.1	1.49875e-07	0.687226	2.6773e-08	1.61018
WBGene00004040	pld-1	C04G6.3	8.83954e-13	0.686182	8.86562e-14	1.60902
WBGene00021597	spsb-1	Y46E12BL.4	1.63113e-09	0.686124	2.23644e-10	1.60896
WBGene00013247		Y57A10A.2	5.12041e-05	0.685219	1.35772e-05	1.60795
WBGene00012237		W04A8.2	0.0140688	0.6848	0.00648552	1.60748
WBGene00019844	abts-4	R03E9.3	1.27154e-09	0.683754	1.72562e-10	1.60631
WBGene00007007	mak-2	C44C8.6	4.43447e-11	0.683196	5.20527e-12	1.60569
WBGene00005241	srh-16	F55C5.9	0.4487	0.682188	0.35665	1.60457
WBGene00012114		T28B8.3	0.215727	0.680854	0.147858	1.60309
WBGene00019012		F57C9.6	0.14242	0.678458	0.0905344	1.60043
WBGene00010581		K05C4.4	3.73956e-05	0.678442	9.67951e-06	1.60041
WBGene00009552	piki-1	F39B1.1	1.15063e-08	0.678003	1.75338e-09	1.59992
WBGene00001547	gcy-22	T03D8.5	0.225891	0.677982	0.156083	1.5999
WBGene00020131	gcy-28	T01A4.1	2.86829e-12	0.677743	3.00151e-13	1.59964
WBGene00020270		T05H4.7	0.298951	0.677424	0.218103	1.59928
WBGene00000800	cars-1	Y23H5A.7	5.28634e-23	0.677363	2.5538e-24	1.59921
WBGene00017848		F27B3.6	0.13681	0.677185	0.0863994	1.59902
WBGene00020498		T14B4.1	5.95332e-18	0.67696	3.94874e-19	1.59877
WBGene00002280	let-2	F01G12.5	8.05646e-05	0.676551	2.22551e-05	1.59831
WBGene00010311		F59B2.9	0.187519	0.675969	0.125194	1.59767
WBGene00020937		W02D3.12	0.00491621	0.675686	0.00200869	1.59736
WBGene00009649		F43C1.5	0.00836086	0.674898	0.00362175	1.59648
WBGene00008077	oac-8	C43F9.10	0.182	0.672841	0.120803	1.59421
WBGene00002245	lag-1	K08B4.1	2.30213e-13	0.672043	2.19091e-14	1.59333
WBGene00006672	twk-18	C24A3.6	6.35218e-08	0.670576	1.07881e-08	1.59171
WBGene00012426		Y11D7A.1	0.182608	0.670516	0.121301	1.59164
WBGene00006375	syp-1	F26D2.2	4.39083e-09	0.669196	6.32036e-10	1.59019
WBGene00012562		Y37H2A.1	1.53103e-11	0.668921	1.71867e-12	1.58988
WBGene00000079	adr-1	H15N14.1	3.28458e-18	0.668678	2.1548e-19	1.58962
WBGene00012969		Y48A6B.8	0.14049	0.668414	0.0891404	1.58932
WBGene00000378	cct-2	T21B10.7	1.65983e-25	0.667318	7.00441e-27	1.58812
WBGene00005724	srv-13	Y73B6BL.39	0.756348	0.666649	0.686834	1.58738
WBGene00016236	cec-9	C29H12.5	1.73393e-09	0.666492	2.38726e-10	1.58721
WBGene00017888	acl-11	F28B3.9	2.71647e-07	0.666466	5.0242e-08	1.58718
WBGene00012875		Y45F10B.13	1.3258e-09	0.666438	1.80475e-10	1.58715
WBGene00019577		K09E3.6	0.0218836	0.666153	0.0106308	1.58684
WBGene00003643	nhr-53	K06B4.11	0.0686635	0.665675	0.0390087	1.58631
WBGene00019760	calu-1	M03F4.7	1.86982e-05	0.664547	4.59395e-06	1.58507
WBGene00022003		Y59E9AR.8	0.380792	0.663094	0.292382	1.58348
WBGene00010672		K08E7.4	0.598206	0.662948	0.510374	1.58332
WBGene00011873		T20G5.12	0.749158	0.662449	0.678086	1.58277
WBGene00010091	ssp-35	F55C5.1	0.194834	0.662364	0.131006	1.58267
WBGene00013678		Y105E8A.20	1.66942e-12	0.660485	1.70633e-13	1.58061
WBGene00004389	rnp-6	Y47G6A.20	6.55391e-19	0.660092	4.09259e-20	1.58018
WBGene00008895		F16H6.5	0.331606	0.660007	0.247593	1.58009
WBGene00016868		C52B9.8	4.23803e-05	0.659325	1.10729e-05	1.57934
WBGene00004058	pmp-1	C44B7.8	8.29809e-08	0.658606	1.42949e-08	1.57856
WBGene00000066	act-4	M03F4.2	1.57355e-05	0.658374	3.81309e-06	1.5783
WBGene00001660	gop-1	C34E10.3	7.66044e-11	0.658367	9.2498e-12	1.5783
WBGene00011513	fbxa-197	T06C12.4	9.04573e-06	0.658136	2.10863e-06	1.57804
WBGene00012845	set-24	Y43F11A.5	2.38247e-14	0.657959	2.09714e-15	1.57785
WBGene00000107	alh-1	F54D8.3	3.45774e-16	0.657638	2.62289e-17	1.5775
WBGene00001565	gei-8	C14B9.6	5.44509e-11	0.656142	6.46204e-12	1.57586
WBGene00013830		ZC15.1	0.394249	0.654881	0.304796	1.57449
WBGene00012794		Y43E12A.2	8.29122e-06	0.65465	1.91986e-06	1.57423
WBGene00016767		C49C8.3	0.00209117	0.654648	0.000776729	1.57423
WBGene00013038	ani-1	Y49E10.19	3.52099e-17	0.654519	2.45392e-18	1.57409
WBGene00020338		T08A9.6	0.00310831	0.654363	0.00120692	1.57392
WBGene00004775	2022-09-01	Y47G6A.12	7.39506e-18	0.65271	4.9548e-19	1.57212
WBGene00022695		ZK328.6	3.51556e-05	0.652412	9.05239e-06	1.57179
WBGene00006831	unc-104	C52E12.2	0.00011711	0.652087	3.33206e-05	1.57144
WBGene00017773	dct-6	F25B5.1	6.97833e-09	0.651926	1.03051e-09	1.57126
WBGene00022176		Y71H2AM.11	2.28088e-10	0.651846	2.8852e-11	1.57118
WBGene00005392	srh-177	K02E2.3	0.756547	0.650708	0.687054	1.56994
WBGene00010209	fbxa-191	F57G4.4	0.0157156	0.648225	0.00733496	1.56724
WBGene00018698	vha-18	F52E1.10	1.032e-14	0.648154	8.80616e-16	1.56716
WBGene00013597	gpi-1	Y87G2A.8	2.22397e-21	0.648091	1.18148e-22	1.56709
WBGene00235164		K09F6.13	0.0785322	0.647453	0.045499	1.5664
WBGene00001698	grd-9	C04E6.6	0.641713	0.646584	0.556352	1.56546
WBGene00012030		T25G3.3	2.16556e-15	0.646311	1.73681e-16	1.56516
WBGene00006489	zhit-3	ZK856.9	1.14077e-13	0.64593	1.05377e-14	1.56475
WBGene00017964		F31F7.1	5.32244e-17	0.645814	3.75903e-18	1.56462
WBGene00008319		C54G10.1	0.583729	0.644366	0.49511	1.56305
WBGene00011116	pdcd-2	R07E5.10	1.84403e-07	0.64334	3.34947e-08	1.56194
WBGene00001058	dpf-5	R11E3.8	2.05101e-18	0.642426	1.32309e-19	1.56095
WBGene00012095	pssy-2	T27E9.5	8.10073e-19	0.642424	5.08786e-20	1.56095
WBGene00022026		Y65B4A.2	0.000947625	0.641915	0.000325611	1.5604
WBGene00006431	tag-52	C02F12.4	2.42074e-10	0.641724	3.07089e-11	1.56019
WBGene00006964	xrn-2	Y48B6A.3	1.36738e-07	0.641273	2.4221e-08	1.5597
WBGene00006288	str-262	C05E4.13	0.565799	0.641073	0.476035	1.55949
WBGene00009245	rict-1	F29C12.3	6.29782e-11	0.640588	7.50664e-12	1.55896
WBGene00013893		ZC434.7	5.45329e-09	0.640352	7.94854e-10	1.55871
WBGene00013024	cept-2	Y49A3A.1	7.65419e-20	0.640333	4.5062e-21	1.55869
WBGene00017396		F12A10.7	0.324909	0.639973	0.241398	1.5583
WBGene00018610		F48E8.3	1.34745e-16	0.638429	9.8444e-18	1.55663
WBGene00010685	aipl-1	K08F9.2	1.02208e-19	0.63839	6.07012e-21	1.55659
WBGene00022154	drag-1	Y71G12B.16	0.0479611	0.638253	0.0258195	1.55644
WBGene00001755	gst-7	F11G11.2	2.50235e-10	0.637923	3.18609e-11	1.55609
WBGene00014049		ZK666.11	0.657725	0.637421	0.574492	1.55555
WBGene00006005	srx-114	F07F6.9	0.728778	0.636944	0.654558	1.55503
WBGene00015766		C14C11.2	9.93086e-10	0.636604	1.33128e-10	1.55466
WBGene00015357		C02F12.8	2.10278e-08	0.636555	3.32299e-09	1.55461
WBGene00000257	bmk-1	F23B12.8	1.75118e-16	0.636422	1.29482e-17	1.55447
WBGene00012758		Y41C4A.12	0.00967571	0.635369	0.00426308	1.55334
WBGene00006585	tni-3	T20B3.2	3.57437e-06	0.635183	7.78059e-07	1.55313
WBGene00019836		R02F2.7	2.72769e-14	0.634951	2.40666e-15	1.55289
WBGene00001548	gcy-23	T26C12.4	0.276054	0.634526	0.198325	1.55243
WBGene00010069		F54F11.1	0.387276	0.63406	0.298543	1.55193
WBGene00018671		F52C6.14	0.0539991	0.63333	0.0296068	1.55114
WBGene00022111		Y71F9AL.6	0.265456	0.632855	0.189447	1.55063
WBGene00018407		F44B9.2	1.08765e-06	0.631366	2.18003e-07	1.54903
WBGene00013804		Y116A8C.27	7.73222e-13	0.63046	7.707e-14	1.54806
WBGene00219325		F17C11.22	0.525972	0.630099	0.434405	1.54767
WBGene00010765		K10H10.10	0.366887	0.629656	0.279349	1.5472
WBGene00020761		T24C4.5	3.68504e-09	0.629285	5.25862e-10	1.5468
WBGene00016304	fbxc-41	C32B5.11	0.431918	0.629066	0.340602	1.54656
WBGene00009445		F35G12.12	9.64912e-17	0.628922	6.91971e-18	1.54641
WBGene00021136		W10G11.3	0.00631977	0.628335	0.00265841	1.54578
WBGene00008384		D1081.6	8.16029e-19	0.627624	5.1295e-20	1.54502
WBGene00015573		C07G1.7	0.7104	0.627549	0.633008	1.54494
WBGene00004208	ptc-1	ZK675.1	3.00898e-12	0.627484	3.15964e-13	1.54487
WBGene00009246	gfm-1	F29C12.4	1.10415e-11	0.627355	1.22633e-12	1.54473
WBGene00013118		Y51H4A.24	5.46198e-05	0.626134	1.45677e-05	1.54342
WBGene00009215	thn-2	F28D1.5	0.00326889	0.626073	0.0012757	1.54336
WBGene00013893		ZC434.7	0.000424103	0.625558	0.000135336	1.54281
WBGene00018967	ddx-15	F56D2.6	3.35496e-12	0.624838	3.54379e-13	1.54204
WBGene00001632	gly-7	Y46H3A.6	1.82557e-18	0.6248	1.17306e-19	1.542
WBGene00022223		Y73B3B.1	0.458017	0.623692	0.365812	1.54081
WBGene00012544		Y37D8A.2	9.99929e-12	0.623675	1.10332e-12	1.5408
WBGene00001589	gip-1	H04J21.3	9.06072e-15	0.622898	7.67532e-16	1.53997
WBGene00011242		R11D1.1	1.93385e-08	0.622155	3.04202e-09	1.53917
WBGene00008775	mogs-1	F13H10.4	2.08848e-21	0.621293	1.10734e-22	1.53825
WBGene00008726		F13A7.11	0.0521073	0.621255	0.0284428	1.53821
WBGene00015557		C06G4.1	1.28125e-09	0.620195	1.74013e-10	1.53708
WBGene00019965		R08F11.1	5.44628e-07	0.619587	1.04622e-07	1.53643
WBGene00077687		Y52B11A.14	0.458916	0.619494	0.366696	1.53634
WBGene00018827	pst-2	F54E7.1	1.67149e-06	0.618613	3.4394e-07	1.5354
WBGene00002087	ins-4	ZK75.1	0.0838197	0.618399	0.048969	1.53517
WBGene00020195		T03G6.3	2.73897e-08	0.618063	4.39642e-09	1.53481
WBGene00018272		F41C3.6	0.511239	0.617993	0.419232	1.53474
WBGene00000685	col-111	F29B9.9	0.0436053	0.617944	0.0232014	1.53469
WBGene00014064	sdz-37	ZK673.10	0.286883	0.617541	0.207278	1.53426
WBGene00016217		C29F9.2	0.0307753	0.617499	0.0156323	1.53421
WBGene00010466		K01D12.7	0.183945	0.61712	0.122341	1.53381
WBGene00001670	gpa-8	F56H9.3	0.650942	0.617003	0.566865	1.53369
WBGene00003478	mtm-6	F53A2.8	8.85317e-12	0.61693	9.70901e-13	1.53361
WBGene00014028	trxr-2	ZK637.10	3.91117e-05	0.616768	1.01602e-05	1.53344
WBGene00009494	hrg-5	F36H1.9	0.58539	0.616608	0.496917	1.53327
WBGene00014151	vps-15	ZK930.1	1.57402e-10	0.616506	1.95601e-11	1.53316
WBGene00001865	him-6	T04A11.6	1.37068e-17	0.616015	9.34697e-19	1.53264
WBGene00020858	mop-25.3	T27C10.3	2.02301e-06	0.61584	4.22556e-07	1.53245
WBGene00009233		F28H6.4	2.84686e-09	0.615303	4.01388e-10	1.53188
WBGene00006463	nduf-2.2	T26A5.3	6.96923e-18	0.615215	4.65866e-19	1.53179
WBGene00018520		F46H5.4	2.71161e-05	0.614742	6.82782e-06	1.53128
WBGene00009793	pkn-1	F46F6.2	1.99121e-08	0.614632	3.13946e-09	1.53117
WBGene00010959	nduo-1	MTCE.11	3.08696e-07	0.614619	5.75579e-08	1.53115
WBGene00013308	nuo-3	Y57G11C.12	8.28733e-10	0.614169	1.10495e-10	1.53068
WBGene00015526		C06E1.11	0.19253	0.613459	0.129108	1.52992
WBGene00004117	sin-3	F02E9.4	1.02113e-15	0.61189	7.99966e-17	1.52826
WBGene00003934	pat-10	F54C1.7	1.5804e-05	0.611119	3.83051e-06	1.52744
WBGene00006742	unc-2	T02C5.5	0.0309755	0.610986	0.0157484	1.5273
WBGene00194849		K09A9.8	0.263496	0.610949	0.187693	1.52726
WBGene00004245	puf-9	W06B11.2	7.46915e-13	0.6109	7.43318e-14	1.52721
WBGene00194851		K07C10.3	0.332215	0.610868	0.248146	1.52718
WBGene00006405	itsn-1	Y116A8C.36	2.49508e-09	0.610844	3.49206e-10	1.52715
WBGene00077692		C08E8.10	0.0426206	0.609916	0.022587	1.52617
WBGene00007748		C26E1.2	0.00155601	0.609841	0.000560916	1.52609
WBGene00012329	sre-44	W07G1.2	0.492572	0.609131	0.400475	1.52534
WBGene00012983	men-1	Y48B6A.12	2.6802e-10	0.608705	3.42501e-11	1.52489
WBGene00007488	dph-2	C09G5.2	1.00814e-12	0.608704	1.01582e-13	1.52489
WBGene00013805	bca-2	Y116A8C.28	1.85842e-09	0.608126	2.56925e-10	1.52428
WBGene00008266		C53A5.6	2.32078e-11	0.607091	2.65088e-12	1.52318
WBGene00015642		C09E7.8	3.48391e-11	0.606523	4.04078e-12	1.52259
WBGene00019935		R07E4.1	0.00600444	0.606291	0.00250897	1.52234
WBGene00003767	nlp-29	B0213.4	0.0937594	0.606003	0.0556207	1.52204
WBGene00009578		F40F8.5	8.43861e-13	0.605853	8.44604e-14	1.52188
WBGene00016073		C24H12.4	3.76848e-19	0.60585	2.30835e-20	1.52187
WBGene00003632	nhr-42	C33G8.6	0.00362666	0.604977	0.00143129	1.52095
WBGene00013196	tbc-20	Y54E2A.12	1.97805e-13	0.604817	1.86712e-14	1.52079
WBGene00001600	glh-3	B0414.6	3.98469e-12	0.604433	4.2461e-13	1.52038
WBGene00009531		F38B2.4	0.0109996	0.603991	0.00491688	1.51992
WBGene00021826	txl-1	Y54E10A.3	4.85498e-11	0.603729	5.72904e-12	1.51964
WBGene00018416	retr-1	F44E2.2	6.22694e-11	0.601721	7.41572e-12	1.51753
WBGene00016194		C28H8.3	1.04323e-17	0.601066	7.03841e-19	1.51684
WBGene00017681	slc-17.5	F21F8.11	0.000333388	0.600822	0.000103902	1.51658
WBGene00011109		R07E5.1	9.13087e-11	0.599994	1.1101e-11	1.51571
WBGene00010880		M05D6.8	0.511239	0.599555	0.419252	1.51525
WBGene00007789		C28A5.2	4.00124e-10	0.599276	5.20018e-11	1.51496
WBGene00011607		T08D2.2	0.0150267	0.599027	0.00697765	1.51469
WBGene00001193	egl-26	C23H3.1	0.000150754	0.598584	4.38688e-05	1.51423
WBGene00044251		F59C6.12	0.00983644	0.597695	0.00433989	1.5133
WBGene00006516	vps-16	C05D11.2	2.09741e-15	0.59761	1.67897e-16	1.51321
WBGene00015582		C07H6.9	0.371648	0.596821	0.283744	1.51238
WBGene00016575		C41H7.5	0.353376	0.596629	0.267433	1.51218
WBGene00077437		Y59H11AR.6	0.00191003	0.596544	0.00070406	1.51209
WBGene00006692	twk-42	W06D12.2	6.99788e-05	0.596336	1.90917e-05	1.51187
WBGene00010988	metr-1	R03D7.1	4.82353e-15	0.596287	4.00358e-16	1.51182
WBGene00019164		H06H21.8	5.46198e-05	0.59599	1.4567e-05	1.51151
WBGene00000738	col-165	F14H12.1	0.405817	0.595963	0.31546	1.51148
WBGene00010639		K07F5.15	2.07666e-05	0.595628	5.13331e-06	1.51113
WBGene00011185		R10D12.1	0.00243534	0.594704	0.000919257	1.51016
WBGene00011375		T02E1.2	8.2155e-11	0.593597	9.9498e-12	1.509
WBGene00000050	acr-11	D2092.3	0.130656	0.592078	0.081825	1.50742
WBGene00017003		D1007.5	2.68916e-15	0.591865	2.17633e-16	1.50719
WBGene00019166	tat-2	H06H21.10	0.00215305	0.591671	0.000802	1.50699
WBGene00012933	mib-1	Y47D3A.22	1.63341e-06	0.590951	3.35596e-07	1.50624
WBGene00016277		C30G12.6	9.737e-13	0.590079	9.80103e-14	1.50533
WBGene00016782	phat-3	C49G7.4	4.80881e-06	0.589146	1.06843e-06	1.50436
WBGene00001131	dys-1	F15D3.1	2.22126e-05	0.589012	5.5172e-06	1.50422
WBGene00008409	mpst-1	D2023.5	1.82514e-06	0.588874	3.78486e-07	1.50407
WBGene00017992		F32E10.5	5.90992e-06	0.588823	1.33327e-06	1.50402
WBGene00001514	xnd-1	C05D2.5	7.75802e-21	0.588557	4.254e-22	1.50374
WBGene00012762		Y41E3.1	2.88626e-16	0.588331	2.17146e-17	1.50351
WBGene00194642		C25H3.17	0.0560634	0.588135	0.0309099	1.5033
WBGene00009523	clec-165	F38A1.10	0.145899	0.588003	0.0931239	1.50316
WBGene00012344	ola-1	W08E3.3	7.86516e-24	0.587244	3.6245e-25	1.50237
WBGene00005009	spr-4	C09H6.1	1.17686e-06	0.587094	2.37041e-07	1.50222
WBGene00003893	ost-1	C44B12.2	6.01165e-07	0.586957	1.15919e-07	1.50208
WBGene00003477	mtm-5	H28G03.6	1.12801e-08	0.586719	1.71832e-09	1.50183
WBGene00021753		Y50D7A.3	1.45241e-16	0.586615	1.06489e-17	1.50172
WBGene00015173	trpp-11	B0412.3	4.53171e-14	0.586489	4.06172e-15	1.50159
WBGene00019989		R09F10.8	1.10477e-10	0.586114	1.35744e-11	1.5012
WBGene00013622	clec-238	Y102A5C.17	0.511536	0.585165	0.419522	1.50021
WBGene00007216		C01A2.4	1.52885e-06	0.585012	3.13164e-07	1.50005
WBGene00018291	fip-4	F41E6.10	0.701077	0.584825	0.62251	1.49986
WBGene00006371	syx-3	F35C8.4	0.000210325	0.58419	6.29601e-05	1.4992
WBGene00043705	egrh-2	Y55F3AM.7	0.00105379	0.58417	0.000366779	1.49918
WBGene00045277		ZK742.6	0.000625276	0.583677	0.000206753	1.49866
WBGene00001090	drh-1	F15B10.2	5.05424e-10	0.582713	6.61592e-11	1.49766
WBGene00021721		Y49F6B.9	3.51634e-07	0.582575	6.59461e-08	1.49752
WBGene00011102		R07E3.1	4.80878e-12	0.582099	5.16907e-13	1.49703
WBGene00001793	gsy-1	Y46G5A.31	5.80441e-15	0.581882	4.84177e-16	1.4968
WBGene00003476	mtm-3	T24A11.1	1.07771e-09	0.579728	1.45198e-10	1.49457
WBGene00019940	npp-21	R07G3.3	2.69472e-13	0.578863	2.58129e-14	1.49367
WBGene00206388		K10C2.14	0.406147	0.578184	0.315782	1.49297
WBGene00016097		C25E10.8	0.00909271	0.577518	0.0039788	1.49228
WBGene00003660	nhr-70	Y51A2D.17	8.10834e-05	0.577296	2.24163e-05	1.49205
WBGene00011146	pde-2	R08D7.6	3.22045e-11	0.576976	3.72286e-12	1.49172
WBGene00015218		B0507.1	0.0272401	0.576571	0.0136208	1.4913
WBGene00000413	cdt-1	Y54E10A.15	2.48955e-08	0.575141	3.97415e-09	1.48982
WBGene00016210		C29F5.1	5.67124e-05	0.574886	1.51758e-05	1.48956
WBGene00011945	hpo-24	T23D8.7	2.91941e-08	0.574637	4.71174e-09	1.4893
WBGene00010451		K01A11.3	0.374647	0.574552	0.286597	1.48922
WBGene00021355		Y37E3.17	3.66658e-15	0.573823	3.01102e-16	1.48846
WBGene00013822		Y116F11B.6	0.180167	0.573681	0.11939	1.48832
WBGene00007063		2L52.1	0.00228561	0.571864	0.000856585	1.48644
WBGene00015458		C04G6.10	0.59806	0.571447	0.510146	1.48601
WBGene00009284		F31C3.2	3.49627e-11	0.571435	4.05693e-12	1.486
WBGene00004451	rpl-37	C54C6.1	6.32054e-07	0.571224	1.22464e-07	1.48578
WBGene00044936		T24H7.6	1	0.571025	0.738577	1.48558
WBGene00003392	mog-4	C04H5.6	1.10259e-11	0.570514	1.22402e-12	1.48505
WBGene00020678		T22B11.4	0.0140315	0.56952	0.00646467	1.48403
WBGene00003768	nlp-30	B0213.5	0.201723	0.569347	0.136411	1.48385
WBGene00007464		C08H9.3	9.2952e-07	0.569009	1.84624e-07	1.4835
WBGene00010969		R01E6.5	0.434212	0.56843	0.342909	1.48291
WBGene00020015	nhr-210	R11G11.12	0.0486687	0.56838	0.0262659	1.48286
WBGene00000542	clp-1	C06G4.2	2.60834e-10	0.567362	3.32779e-11	1.48181
WBGene00006067	sto-5	F41G4.3	0.0112521	0.567195	0.00504372	1.48164
WBGene00001095	dars-2	F10C2.6	9.16218e-07	0.566364	1.81934e-07	1.48079
WBGene00022862		ZK1236.1	5.39138e-09	0.565611	7.84993e-10	1.48001
WBGene00011189		R10D12.8	0.00362669	0.565315	0.00143149	1.47971
WBGene00007952		C35A5.8	1.79168e-16	0.564973	1.32755e-17	1.47936
WBGene00012998		Y48C3A.20	5.11726e-08	0.564505	8.561e-09	1.47888
WBGene00010622		K07A12.4	1.65813e-10	0.564327	2.06655e-11	1.4787
WBGene00007195		B0513.2	0.495492	0.56398	0.403362	1.47834
WBGene00045293	fbxa-175	C38D9.12	0.381642	0.563726	0.293192	1.47808
WBGene00001482	fog-2	Y113G7B.5	1.15178e-06	0.563396	2.31572e-07	1.47774
WBGene00017440	upb-1	F13H8.7	0.00012356	0.561894	3.53114e-05	1.47621
WBGene00016129		C26B2.7	8.32917e-05	0.561887	2.30903e-05	1.4762
WBGene00007184	ctr-9	B0464.2	3.3733e-09	0.561587	4.7963e-10	1.47589
WBGene00009366		F33H2.2	1.74767e-09	0.560523	2.4107e-10	1.4748
WBGene00008275	nstp-1	C53B4.6	1.48068e-05	0.56052	3.57118e-06	1.4748
WBGene00014063	clec-143	ZK673.9	0.55881	0.559398	0.46851	1.47365
WBGene00019893	sgt-1	R05F9.10	4.70631e-17	0.558515	3.31169e-18	1.47275
WBGene00019588		K09F6.5	0.370677	0.55842	0.282869	1.47266
WBGene00022567		ZC239.4	0.59806	0.558085	0.509994	1.47231
WBGene00000033	abu-10	F35A5.3	0.0183135	0.55792	0.00871508	1.47215
WBGene00013221		Y54G11A.14	0.105636	0.557752	0.0638204	1.47197
WBGene00021934	cct-8	Y55F3AR.3	1.41493e-12	0.557692	1.43962e-13	1.47191
WBGene00015171	vang-1	B0410.2	0.000796425	0.557668	0.000269324	1.47189
WBGene00001087	dpy-28	Y39A1B.3	1.86693e-07	0.557515	3.39495e-08	1.47173
WBGene00006769	unc-33	Y37E11C.1	1.09964e-07	0.557308	1.92393e-08	1.47152
WBGene00014826		R13H4.2	1.66208e-06	0.557205	3.41776e-07	1.47142
WBGene00012714	abce-1	Y39E4B.1	4.82521e-23	0.557161	2.31604e-24	1.47137
WBGene00021723	bath-8	Y49F6C.1	0.617833	0.556809	0.530627	1.47101
WBGene00020058		R13D11.4	0.0106644	0.555671	0.00475157	1.46985
WBGene00022353		Y82E9BR.21	0.106439	0.555481	0.0644043	1.46966
WBGene00021637		Y47G6A.7	1.0853e-06	0.555299	2.17475e-07	1.46947
WBGene00018118		F36H12.2	0.00249575	0.555081	0.000944256	1.46925
WBGene00016469		C36B7.6	4.27557e-09	0.554733	6.13674e-10	1.4689
WBGene00009124	rtel-1	F25H2.13	5.1169e-13	0.554703	5.02072e-14	1.46887
WBGene00017858		F27C1.11	0.23558	0.5546	0.164088	1.46876
WBGene00003059	lpd-2	C48E7.3	5.63275e-09	0.554223	8.22177e-10	1.46838
WBGene00007281		C03E10.3	0.213095	0.55402	0.14569	1.46817
WBGene00044298		T23B7.2	0.619629	0.553911	0.532618	1.46806
WBGene00021635		Y47G6A.5	0.000892617	0.553195	0.000305412	1.46733
WBGene00001727	grl-18	T05C3.4	0.491897	0.551927	0.399773	1.46604
WBGene00001872	him-14	ZK1127.11	1.40464e-06	0.551702	2.8612e-07	1.46581
WBGene00012342	mtr-4	W08D2.7	1.56038e-15	0.551413	1.23696e-16	1.46552
WBGene00020927		W02B3.7	0.739949	0.551054	0.667115	1.46516
WBGene00000199	arx-1	Y71F9AL.16	1.54457e-05	0.549719	3.74207e-06	1.4638
WBGene00044321	mrps-30	B0511.8	3.51942e-12	0.549633	3.72115e-13	1.46371
WBGene00007725		C25F9.5	0.00964545	0.54944	0.00424664	1.46352
WBGene00020618		T20D4.12	0.655716	0.54871	0.572024	1.46278
WBGene00015017		B0205.1	7.07863e-11	0.548502	8.48131e-12	1.46257
WBGene00007150	acly-2	B0365.1	4.31159e-15	0.54808	3.56304e-16	1.46214
WBGene00014078		ZK792.5	2.20525e-09	0.547955	3.07271e-10	1.46201
WBGene00018776		F53H1.1	1.49778e-06	0.547859	3.06335e-07	1.46191
WBGene00013242		Y56A3A.30	0.000284692	0.547532	8.73992e-05	1.46158
WBGene00194935		M02G9.4	0.612404	0.547464	0.524658	1.46151
WBGene00016197	pxl-1	C28H8.6	8.98301e-07	0.547342	1.78051e-07	1.46139
WBGene00015714		C12D12.3	0.625349	0.547071	0.539057	1.46112
WBGene00001477	fmo-2	K08C7.5	0.643201	0.546489	0.55791	1.46053
WBGene00003669	nhr-79	T26H2.9	0.0142493	0.545921	0.00657977	1.45995
WBGene00009439	mlcd-1	F35G12.1	8.9846e-06	0.545278	2.09385e-06	1.4593
WBGene00010061		F54E12.2	6.80488e-12	0.544543	7.39224e-13	1.45856
WBGene00015927	dyci-1	C17H12.1	3.64014e-09	0.544311	5.18889e-10	1.45832
WBGene00011913	glb-26	T22C1.2	0.253541	0.543979	0.179042	1.45799
WBGene00014164	lact-2	ZK945.1	7.92852e-07	0.543858	1.55467e-07	1.45787
WBGene00018891		F55F8.3	4.28355e-11	0.54373	5.01925e-12	1.45774
WBGene00009163	drsh-1	F26E4.10	1.08823e-10	0.543651	1.33542e-11	1.45766
WBGene00014492		R166.6	5.89585e-10	0.542112	7.76629e-11	1.4561
WBGene00015351		C02F5.10	0.22365	0.541556	0.154203	1.45554
WBGene00016333		C32F10.8	1.14057e-09	0.541528	1.54198e-10	1.45551
WBGene00022222		Y73B3A.21	0.0168388	0.540963	0.00793805	1.45494
WBGene00017556		F18A12.7	0.120924	0.540658	0.0749036	1.45464
WBGene00010806		M01E5.3	8.1198e-07	0.539985	1.59428e-07	1.45396
WBGene00194855		Y75B8A.44	0.470369	0.539139	0.378185	1.45311
WBGene00009121		F25H2.7	0.000274039	0.538987	8.38876e-05	1.45295
WBGene00045434		Y95D11A.3	1.40375e-06	0.538768	2.85867e-07	1.45273
[truncated: 6,105 more rows]

## Sheet: D. Cat1
Category 1	Count	control.up_RGS	control.up_PValue	sams1.up_RGS	sams1.up_PValue	sams4.up_RGS	sams4.up_PValue	control.down_RGS	control.down_PValue	sams1.down_RGS	sams1.down_PValue	sams4.down_RGS	sams4.down_PValue
Stress response	833	41	8.4021e-14	76	9.76075e-15	39	0.00332509	7	0.0417367	101	1.34758e-10	83	3.3902e-10
Transcription: chromatin	222	12	1.44293e-05	18	0.000388607	7	NS	0	NV	8	NS	11	NS
Proteolysis proteasome	733	18	0.00218263	47	9.17938e-06	24	NS	1	NS	48	NS	59	3.76675e-05
Unassigned	6343	92	0.0126052	282	1.26335e-07	280	8.95881e-10	20	NS	396	NS	437	2.54419e-14
Chaperone	92	4	0.021462	19	9.84335e-10	3	NS	0	NV	5	NS	5	NS
Cell cycle	172	2	NS	10	0.0479724	6	NS	1	NS	4	NS	2	NS
Cytoskeleton	371	2	NS	17	NS	28	1.12778e-05	2	NS	31	0.0329448	21	NS
DNA	176	3	NS	7	NS	3	NS	0	NV	2	NS	2	NS
Development	295	4	NS	27	2.27226e-06	14	NS	0	NV	31	0.00198279	14	NS
Extracellular material	495	3	NS	15	NS	15	NS	1	NS	63	6.19593e-08	66	3.24653e-13
Metabolism	1601	22	NS	57	NS	50	NS	15	0.00185914	234	7.94944e-31	64	NS
Muscle function	62	2	NS	5	0.0499597	2	NS	0	NV	7	NS	0	NV
Non-coding RNA	9535	43	NS	62	NS	21	NS	3	NS	16	NS	28	NS
Nucleic acid	231	1	NS	10	NS	6	NS	0	NV	16	NS	11	NS
Protein modification	271	2	NS	9	NS	4	NS	1	NS	31	0.000583208	9	NS
Proteolysis general	394	4	NS	18	NS	23	0.00178011	5	0.0182372	55	2.69377e-08	37	5.76622e-05
Pseudogene	2081	14	NS	55	NS	76	0.0265466	6	NS	49	NS	34	NS
Ribosome	244	3	NS	4	NS	8	NS	1	NS	3	NS	5	NS
Signaling	1188	18	NS	52	0.0116328	70	1.29282e-07	4	NS	140	4.41889e-13	76	0.00220896
Trafficking	205	3	NS	10	NS	5	NS	1	NS	14	NS	4	NS
Transcription factor	581	7	NS	10	NS	8	NS	6	0.0249303	127	2.86795e-31	52	8.03792e-06
Transcription: general machinery	154	2	NS	8	NS	15	8.84019e-05	0	NV	3	NS	2	NS
Transmembrane protein	3200	24	NS	66	NS	95	NS	12	NS	126	NS	183	0.00114249
Transmembrane transport	901	7	NS	25	NS	39	0.0106128	22	6.17382e-11	195	9.59329e-46	79	1.19546e-07
mRNA functions	407	5	NS	18	NS	18	NS	0	NV	7	NS	6	NS
Cilia	60	0	NV	3	NS	1	NS	0	NV	1	NS	9	0.00254248
Globin	36	0	NV	0	NV	0	NV	0	NV	2	NS	11	3.45165e-06
Lysosome	91	0	NV	4	NS	2	NS	2	0.0474693	18	2.39965e-05	5	NS
Major sperm protein	31	0	NV	0	NV	7	7.58374e-05	0	NV	0	NV	0	NV
Neuronal function	308	0	NV	10	NS	3	NS	5	0.00701578	38	3.80448e-05	62	8.38206e-20
Nuclear pore	36	0	NV	2	NS	0	NV	0	NV	0	NV	0	NV
Peroxisome	15	0	NV	0	NV	0	NV	0	NV	6	0.00067812	1	NS
Transcription: dosage compensation	10	0	NV	1	NS	2	0.0422065	0	NV	0	NV	0	NV
Transcription: unassigned	15	0	NV	0	NV	0	NV	0	NV	0	NV	0	NV

## Sheet: E. Cat2
Category 2	Count	control.up_RGS	control.up_PValue	sams1.up_RGS	sams1.up_PValue	sams4.up_RGS	sams4.up_PValue	control.down_RGS	control.down_PValue	sams1.down_RGS	sams1.down_PValue	sams4.down_RGS	sams4.down_PValue
Stress response: heat	30	14	3.62339e-17	18	1.23999e-15	4	0.0141693	0	NV	2	NS	1	NS
Transcription: chromatin structure	105	9	5.44315e-06	8	0.0204412	4	NS	0	NV	4	NS	9	NS
Proteolysis proteasome: E3	590	17	0.00055645	40	1.21818e-05	19	NS	1	NS	45	0.0437555	58	1.74557e-07
Stress response: pathogen	192	8	0.00181323	20	7.71157e-06	3	NS	0	NV	10	NS	26	2.65718e-06
Chaperone: HSP	5	2	0.00241342	2	0.0169192	1	NS	0	NV	0	NV	0	NV
Stress response: unassigned	49	4	0.00273821	6	0.00589173	3	NS	0	NV	15	1.31859e-06	3	NS
Transcription factor: bZIP	24	3	0.00313849	3	0.0456175	1	NS	0	NV	3	NS	2	NS
Signaling: calcium	35	3	0.00827661	2	NS	0	NV	0	NV	3	NS	5	0.0263373
Stress response: detoxification	206	7	0.00965971	17	0.000460172	1	NS	4	0.0084444	42	7.73459e-11	17	0.0152699
Metabolism: pentose phosphate pathway	13	2	0.0113846	2	NS	0	NV	0	NV	2	NS	0	NV
Unassigned	6343	92	0.0126052	282	1.26335e-07	280	8.95881e-10	20	NS	396	NS	437	2.54419e-14
Stress response: heavy metal	16	2	0.0162326	3	0.0180155	2	NS	0	NV	2	NS	2	NS
Stress response: ER	24	2	0.0325511	1	NS	1	NS	0	NV	1	NS	1	NS
Stress response: oxidative	28	2	0.0423389	2	NS	2	NS	0	NV	4	NS	0	NV
Signaling: heteromeric G protein	170	5	0.0442619	6	NS	5	NS	0	NV	18	0.0143549	23	9.72507e-06
DNA: replication	69	3	0.0445442	4	NS	2	NS	0	NV	1	NS	1	NS
Non-coding RNA: linc	174	5	0.0479195	14	0.00172797	9	NS	0	NV	3	NS	6	NS
Cell cycle: meiotic/mitotic spindle	23	1	NS	3	0.0414438	2	NS	0	NV	0	NV	0	NV
Cell cycle: unassigned	26	1	NS	4	0.0117169	1	NS	1	NS	1	NS	1	NS
Chaperone: DnaJ domain	31	1	NS	3	NS	0	NV	0	NV	0	NV	1	NS
Chaperone: unassigned	14	1	NS	2	NS	1	NS	0	NV	2	NS	2	NS
Cytoskeleton: microtubule	128	2	NS	6	NS	18	1.6693e-07	1	NS	2	NS	5	NS
Development: apoptosis	64	1	NS	8	0.0013925	1	NS	0	NV	6	NS	3	NS
Development: general	81	1	NS	8	0.00525953	6	0.0343942	0	NV	4	NS	0	NV
Development: somatic	122	2	NS	11	0.0022886	4	NS	0	NV	19	0.000241802	10	NS
Extracellular material: collagen	184	2	NS	9	NS	6	NS	0	NV	26	8.5199e-05	22	7.97944e-05
Extracellular material: galectin	26	1	NS	1	NS	1	NS	0	NV	0	NV	0	NV
Metabolism: carbohydrate	83	3	NS	4	NS	4	NS	1	NS	12	0.00533689	2	NS
Metabolism: lipid	526	10	NS	24	0.0450653	18	NS	5	NS	110	4.40736e-26	25	NS
Metabolism: mitochondria	366	3	NS	9	NS	11	NS	0	NV	13	NS	7	NS
Metabolism: nucleotide	111	1	NS	3	NS	2	NS	1	NS	13	0.0173948	4	NS
Metabolism: short chain dehydrogenase	42	2	NS	6	0.00297719	2	NS	0	NV	7	0.0159325	4	NS
Metabolism: unassigned	192	1	NS	4	NS	5	NS	2	NS	28	2.85839e-05	11	NS
Muscle function	62	2	NS	5	0.0499597	2	NS	0	NV	7	NS	0	NV
Non-coding RNA: ncRNA	7850	35	NS	31	NS	6	NS	1	NS	6	NS	13	NS
Non-coding RNA: small RNA	50	1	NS	5	0.0240221	5	0.0181787	0	NV	4	NS	1	NS
Non-coding RNA: snoRNA	344	2	NS	5	NS	0	NV	1	NS	2	NS	5	NS
Nucleic acid: binding	229	1	NS	9	NS	6	NS	0	NV	16	NS	11	NS
Protein modification: carbohydrate	129	1	NS	3	NS	1	NS	1	NS	22	2.48711e-05	7	NS
Protein modification: methyltransferase	76	1	NS	4	NS	1	NS	0	NV	6	NS	0	NV
Proteolysis general: aspartate	33	1	NS	2	NS	0	NV	1	NS	3	NS	5	0.021531
Proteolysis general: serine	34	2	NS	3	NS	0	NV	1	NS	5	NS	4	NS
Proteolysis general: unassigned	68	1	NS	5	NS	5	NS	1	NS	11	0.00354306	5	NS
Proteolysis proteasome: unassigned	24	1	NS	2	NS	2	NS	0	NV	0	NV	1	NS
Pseudogene	2081	14	NS	55	NS	76	0.0265466	6	NS	49	NS	34	NS
Ribosome: subunit	92	3	NS	1	NS	3	NS	1	NS	1	NS	4	NS
Signaling: CDK-like	6	1	NS	0	NV	0	NV	0	NV	1	NS	0	NV
Signaling: MAPK	32	1	NS	3	NS	2	NS	0	NV	9	0.000290976	3	NS
Signaling: S/T kinase	66	1	NS	5	NS	3	NS	0	NV	2	NS	3	NS
Signaling: TGF beta	17	1	NS	2	NS	0	NV	0	NV	6	0.00114869	1	NS
Signaling: hedgehog-like	89	1	NS	4	NS	1	NS	0	NV	27	1.17479e-10	10	0.00953141
Signaling: lipid	102	1	NS	5	NS	2	NS	1	NS	9	NS	8	NS
Signaling: phosphatase	196	2	NS	6	NS	39	8.04558e-19	1	NS	7	NS	4	NS
Signaling: small GTPase	183	1	NS	8	NS	3	NS	2	NS	17	0.0456289	5	NS
Signaling: unassigned	70	1	NS	4	NS	2	NS	0	NV	9	0.0270872	2	NS
Stress response: C-type Lectin	256	2	NS	8	NS	23	5.01592e-06	3	NS	23	0.031574	31	2.65105e-06
Trafficking: ER/Golgi	87	1	NS	3	NS	4	NS	1	NS	8	NS	3	NS
Trafficking: vesicle targeting/fusion	67	2	NS	5	NS	1	NS	0	NV	1	NS	1	NS
Transcription factor: NHR	259	4	NS	4	NS	6	NS	5	0.003468	90	4.68791e-35	12	NS
Transcription: chromatin modification	117	3	NS	10	0.00501107	3	NS	0	NV	4	NS	2	NS
Transcription: general machinery: RNA Pol II	133	2	NS	8	NS	14	7.02223e-05	0	NV	3	NS	2	NS
Transmembrane protein: seven transmembrane receptor	1473	8	NS	15	NS	5	NS	1	NS	10	NS	37	NS
Transmembrane protein: unassigned	1692	16	NS	49	NS	90	2.09359e-07	11	NS	115	0.0486988	146	5.36673e-12
Transmembrane transport: chloride channel	44	1	NS	1	NS	3	NS	1	NS	8	0.00661233	6	0.0187759
Transmembrane transport: potassium channel	121	1	NS	3	NS	0	NV	1	NS	17	0.00137907	11	0.0255218
Transmembrane transport: sodium channel	32	1	NS	2	NS	1	NS	0	NV	5	0.0480408	2	NS
Transmembrane transport: solute carrier	197	3	NS	7	NS	11	0.0321041	6	0.000139547	50	1.06649e-15	20	0.0010815
Transmembrane transport: sulfate	8	1	NS	2	0.0341636	1	NS	0	NV	2	NS	0	NV
mRNA functions: processing	296	5	NS	16	0.0272247	14	NS	0	NV	3	NS	3	NS
Cell cycle: APC	16	0	NV	0	NV	1	NS	0	NV	0	NV	0	NV
Cell cycle: chromosome dynamics	65	0	NV	1	NS	1	NS	0	NV	1	NS	0	NV
Cell cycle: cyclin	11	0	NV	1	NS	0	NV	0	NV	1	NS	0	NV
Cell cycle: kinase	24	0	NV	0	NV	1	NS	0	NV	1	NS	1	NS
Cell cycle: phosphatase	4	0	NV	0	NV	0	NV	0	NV	0	NV	0	NV
Cell cycle: transcriptional regulator	3	0	NV	1	NS	0	NV	0	NV	0	NV	0	NV
Chaperone: T complex	8	0	NV	6	1.7432e-06	0	NV	0	NV	0	NV	0	NV
Chaperone: cyclophilin	28	0	NV	4	0.014668	1	NS	0	NV	3	NS	2	NS
Chaperone: prefoldin	6	0	NV	2	0.0221153	0	NV	0	NV	0	NV	0	NV
Cilia: IFT	38	0	NV	1	NS	1	NS	0	NV	1	NS	7	0.00273016
Cilia: transition zone	11	0	NV	1	NS	0	NV	0	NV	0	NV	1	NS
Cilia: unassigned	11	0	NV	1	NS	0	NV	0	NV	0	NV	1	NS
Cytoskeleton: actin function	42	0	NV	3	NS	1	NS	0	NV	2	NS	0	NV
Cytoskeleton: cadherin	11	0	NV	0	NV	4	0.0006342	0	NV	6	0.000186655	2	NS
Cytoskeleton: centrosome	12	0	NV	1	NS	1	NS	0	NV	0	NV	0	NV
Cytoskeleton: claudin	15	0	NV	1	NS	0	NV	1	NS	4	0.0173434	5	0.00125082
Cytoskeleton: innexin	24	0	NV	2	NS	0	NV	0	NV	2	NS	0	NV
Cytoskeleton: integrin	4	0	NV	0	NV	0	NV	0	NV	0	NV	0	NV
Cytoskeleton: intermediate filament protein	12	0	NV	1	NS	0	NV	0	NV	5	0.00166895	4	0.00391484
Cytoskeleton: motor protein	41	0	NV	0	NV	2	NS	0	NV	2	NS	3	NS
Cytoskeleton: paxillin	5	0	NV	0	NV	0	NV	0	NV	0	NV	0	NV
Cytoskeleton: unassigned	77	0	NV	3	NS	2	NS	0	NV	8	NS	2	NS
DNA: helicase	9	0	NV	0	NV	0	NV	0	NV	0	NV	0	NV
DNA: nuclease	17	0	NV	0	NV	1	NS	0	NV	1	NS	1	NS
DNA: repair	68	0	NV	3	NS	0	NV	0	NV	0	NV	0	NV
DNA: telomere	10	0	NV	0	NV	0	NV	0	NV	0	NV	0	NV
DNA: transposon function	3	0	NV	0	NV	0	NV	0	NV	0	NV	0	NV
Development: germline	23	0	NV	0	NV	3	0.0344996	0	NV	1	NS	0	NV
Development: sex determination	5	0	NV	0	NV	0	NV	0	NV	1	NS	1	NS
Extracellular material: PGI	53	0	NV	0	NV	2	NS	0	NV	8	0.0168587	8	0.00417802
Extracellular material: chitinase	37	0	NV	0	NV	0	NV	0	NV	2	NS	2	NS
Extracellular material: chondroitin sulfotransferase	27	0	NV	0	NV	0	NV	0	NV	3	NS	3	NS
Extracellular material: cuticlin	35	0	NV	1	NS	0	NV	0	NV	8	0.00196301	7	0.00181362
Extracellular material: lectin	4	0	NV	0	NV	1	NS	0	NV	0	NV	1	NS
Extracellular material: matrix	67	0	NV	3	NS	4	NS	1	NS	9	0.0216378	14	7.84486e-06
Extracellular material: mucin	4	0	NV	0	NV	0	NV	0	NV	1	NS	1	NS
Extracellular material: secreted protein	54	0	NV	1	NS	1	NS	0	NV	5	NS	8	0.00462102
Extracellular material: unassigned	4	0	NV	0	NV	0	NV	0	NV	1	NS	0	NV
Globin	36	0	NV	0	NV	0	NV	0	NV	2	NS	11	3.45165e-06
Lysosome: Vacuolar ATPase	22	0	NV	0	NV	0	NV	0	NV	4	0.0496151	0	NV
Lysosome: acid phosphatase	31	0	NV	2	NS	1	NS	2	0.00679413	11	1.06791e-05	3	NS
Lysosome: autophagy	25	0	NV	2	NS	1	NS	0	NV	1	NS	1	NS
Lysosome: unassigned	13	0	NV	0	NV	0	NV	0	NV	2	NS	1	NS
Major sperm protein	31	0	NV	0	NV	7	7.58374e-05	0	NV	0	NV	0	NV
Metabolism: 1CC	29	0	NV	0	NV	1	NS	2	0.00601341	6	0.0105818	4	0.0498182
Metabolism: B12	5	0	NV	0	NV	0	NV	0	NV	1	NS	0	NV
Metabolism: B6	2	0	NV	0	NV	0	NV	0	NV	0	NV	0	NV
Metabolism: FMO	5	0	NV	0	NV	0	NV	0	NV	1	NS	0	NV
Metabolism: amino acid	82	0	NV	2	NS	3	NS	2	0.0395423	26	1.15351e-10	1	NS
Metabolism: amino sugar	14	0	NV	0	NV	0	NV	1	NS	3	NS	0	NV
Metabolism: carbonic anhydrase	6	0	NV	0	NV	0	NV	0	NV	1	NS	0	NV
Metabolism: creatine kinase	6	0	NV	0	NV	1	NS	0	NV	0	NV	0	NV
Metabolism: glutathione	20	0	NV	2	NS	0	NV	0	NV	3	NS	0	NV
Metabolism: glycolysis	37	0	NV	0	NV	2	NS	1	NS	4	NS	0	NV
Metabolism: insulin	39	0	NV	0	NV	1	NS	0	NV	1	NS	5	0.0378697
Metabolism: molybdenum cofactor	10	0	NV	0	NV	0	NV	0	NV	0	NV	1	NS
Metabolism: nicotinate and nicotinamide metabolism	6	0	NV	0	NV	0	NV	0	NV	0	NV	0	NV
Metabolism: polyamine	7	0	NV	1	NS	0	NV	0	NV	3	0.0143061	0	NV
Neuronal function: development	15	0	NV	0	NV	1	NS	0	NV	0	NV	1	NS
Neuronal function: synaptic function	244	0	NV	7	NS	2	NS	4	0.0147399	33	2.36577e-05	53	1.97055e-18
Neuronal function: transcription factor	7	0	NV	1	NS	0	NV	0	NV	0	NV	1	NS
Neuronal function: unassigned	42	0	NV	2	NS	0	NV	1	NS	5	NS	7	0.00445905
Non-coding RNA: asRNA	16	0	NV	4	0.00262532	0	NV	0	NV	0	NV	0	NV
Non-coding RNA: miRNA	257	0	NV	0	NV	0	NV	0	NV	0	NV	1	NS
Non-coding RNA: processing	3	0	NV	0	NV	0	NV	0	NV	0	NV	0	NV
Non-coding RNA: snRNA	129	0	NV	0	NV	0	NV	0	NV	0	NV	0	NV
Non-coding RNA: tRNA	712	0	NV	3	NS	1	NS	1	NS	1	NS	2	NS
Nuclear pore: structure	28	0	NV	1	NS	0	NV	0	NV	0	NV	0	NV
Nuclear pore: transport	8	0	NV	1	NS	0	NV	0	NV	0	NV	0	NV
Nucleic acid: helicase	2	0	NV	1	NS	0	NV	0	NV	0	NV	0	NV
Peroxisome: biogenesis	9	0	NV	0	NV	0	NV	0	NV	4	0.00414923	1	NS
Peroxisome: transporter	5	0	NV	0	NV	0	NV	0	NV	2	NS	0	NV
Peroxisome: unassigned	1	0	NV	0	NV	0	NV	0	NV	0	NV	0	NV
Protein modification: SUMO	12	0	NV	2	NS	0	NV	0	NV	0	NV	0	NV
Protein modification: acetyltransferase	17	0	NV	0	NV	1	NS	0	NV	0	NV	1	NS
Protein modification: acyltransferase	3	0	NV	0	NV	0	NV	0	NV	0	NV	0	NV
Protein modification: deacylase	4	0	NV	0	NV	0	NV	0	NV	0	NV	0	NV
Protein modification: lipidation	17	0	NV	0	NV	1	NS	0	NV	2	NS	0	NV
Protein modification: unassigned	13	0	NV	0	NV	0	NV	0	NV	1	NS	1	NS
Proteolysis general: carboxypeptidase	16	0	NV	0	NV	0	NV	0	NV	6	0.000889723	2	NS
Proteolysis general: cysteine	41	0	NV	1	NS	5	0.00878425	0	NV	3	NS	1	NS
Proteolysis general: inhibitor	66	0	NV	4	NS	1	NS	0	NV	1	NS	7	0.0352886
Proteolysis general: lysozyme	11	0	NV	1	NS	1	NS	0	NV	0	NV	0	NV
Proteolysis general: metallopeptidase	123	0	NV	2	NS	11	0.00138019	2	NS	26	1.44119e-07	13	0.00546513
Proteolysis general: signal	2	0	NV	0	NV	0	NV	0	NV	0	NV	0	NV
Proteolysis proteasome: 19S	26	0	NV	1	NS	1	NS	0	NV	0	NV	0	NV
Proteolysis proteasome: 20S	13	0	NV	0	NV	0	NV	0	NV	0	NV	0	NV
Proteolysis proteasome: E1	1	0	NV	1	NS	0	NV	0	NV	0	NV	0	NV
Proteolysis proteasome: E1 like	1	0	NV	1	NS	0	NV	0	NV	0	NV	0	NV
Proteolysis proteasome: E2	17	0	NV	0	NV	1	NS	0	NV	1	NS	0	NV
Proteolysis proteasome: ERAD	3	0	NV	0	NV	0	NV	0	NV	0	NV	0	NV
Proteolysis proteasome: NEDD	11	0	NV	0	NV	0	NV	0	NV	0	NV	0	NV
Proteolysis proteasome: ubiquitin	8	0	NV	1	NS	0	NV	0	NV	0	NV	0	NV
Proteolysis proteasome: ubiquitin domain	4	0	NV	1	NS	0	NV	0	NV	0	NV	0	NV
Proteolysis proteasome: ubiquitin hydrolase	4	0	NV	0	NV	0	NV	0	NV	0	NV	0	NV
Proteolysis proteasome: ubiquitin peptidase	31	0	NV	0	NV	1	NS	0	NV	2	NS	0	NV
Ribosome: EIF	60	0	NV	1	NS	3	NS	0	NV	1	NS	1	NS
Ribosome: S6 kinase	6	0	NV	0	NV	0	NV	0	NV	0	NV	0	NV
Ribosome: biogenesis	54	0	NV	1	NS	2	NS	0	NV	0	NV	0	NV
Ribosome: elongation	2	0	NV	0	NV	0	NV	0	NV	0	NV	0	NV
Ribosome: rRNA	13	0	NV	0	NV	0	NV	0	NV	0	NV	0	NV
Ribosome: signal recognition	5	0	NV	0	NV	0	NV	0	NV	0	NV	0	NV
Ribosome: unassigned	12	0	NV	1	NS	0	NV	0	NV	1	NS	0	NV
Signaling: AKT	3	0	NV	1	NS	0	NV	0	NV	0	NV	0	NV
Signaling: AMPK	9	0	NV	1	NS	1	NS	0	NV	3	0.0241826	1	NS
Signaling: FERM	10	0	NV	0	NV	1	NS	0	NV	1	NS	0	NV
Signaling: FGF	6	0	NV	1	NS	0	NV	0	NV	0	NV	2	0.042478
Signaling: Janus	1	0	NV	0	NV	0	NV	0	NV	0	NV	0	NV
Signaling: MAGUK	5	0	NV	0	NV	0	NV	0	NV	1	NS	1	NS
Signaling: Notch	18	0	NV	0	NV	2	NS	0	NV	1	NS	1	NS
Signaling: PKC	5	0	NV	0	NV	0	NV	0	NV	1	NS	0	NV
Signaling: PKD	4	0	NV	1	NS	0	NV	0	NV	0	NV	0	NV
Signaling: SH domain	13	0	NV	0	NV	0	NV	0	NV	1	NS	0	NV
Signaling: TOR	8	0	NV	0	NV	0	NV	0	NV	0	NV	0	NV
Signaling: VEGF	1	0	NV	1	NS	0	NV	0	NV	0	NV	0	NV
Signaling: WNT	30	0	NV	0	NV	0	NV	0	NV	5	0.0390712	1	NS
Signaling: Y kinase	73	0	NV	2	NS	8	0.00188899	0	NV	12	0.00211416	3	NS
Signaling: cAMP	2	0	NV	0	NV	0	NV	0	NV	1	NS	0	NV
Signaling: casein kinase	10	0	NV	0	NV	1	NS	0	NV	1	NS	0	NV
Signaling: caveolin	2	0	NV	0	NV	0	NV	0	NV	0	NV	1	NS
Signaling: dual specificity	4	0	NV	0	NV	0	NV	0	NV	0	NV	0	NV
Signaling: extracellular	2	0	NV	0	NV	0	NV	0	NV	2	0.0163558	2	0.0101951
Signaling: frizzled	5	0	NV	0	NV	0	NV	0	NV	3	0.00724451	0	NV
Signaling: hippo	5	0	NV	0	NV	0	NV	0	NV	0	NV	0	NV
Signaling: rhomboid	6	0	NV	0	NV	0	NV	0	NV	0	NV	0	NV
Stress response: dauer	8	0	NV	0	NV	0	NV	0	NV	1	NS	1	NS
Stress response: osmotic	3	0	NV	0	NV	0	NV	0	NV	0	NV	0	NV
Stress response: signaling	4	0	NV	0	NV	0	NV	0	NV	0	NV	0	NV
Stress response: thioredoxin	15	0	NV	1	NS	0	NV	0	NV	1	NS	1	NS
Stress response: transcriptional regulator	2	0	NV	0	NV	0	NV	0	NV	0	NV	0	NV
Trafficking: endocytosis	29	0	NV	0	NV	0	NV	0	NV	2	NS	0	NV
Trafficking: exocyst	8	0	NV	0	NV	0	NV	0	NV	1	NS	0	NV
Trafficking: unassigned	14	0	NV	2	NS	0	NV	0	NV	2	NS	0	NV
Transcription factor: AIRD	2	0	NV	0	NV	0	NV	0	NV	0	NV	0	NV
Transcription factor: AP2	4	0	NV	0	NV	0	NV	0	NV	0	NV	0	NV
Transcription factor: CREB	3	0	NV	0	NV	0	NV	0	NV	0	NV	0	NV
Transcription factor: E2F	2	0	NV	0	NV	0	NV	0	NV	1	NS	0	NV
Transcription factor: ETS	12	0	NV	0	NV	0	NV	0	NV	0	NV	1	NS
Transcription factor: GATA	11	0	NV	0	NV	0	NV	0	NV	3	0.0369103	0	NV
Transcription factor: HMG box	4	0	NV	0	NV	0	NV	0	NV	1	NS	1	NS
Transcription factor: NF	6	0	NV	0	NV	0	NV	0	NV	0	NV	0	NV
Transcription factor: T box	21	0	NV	0	NV	0	NV	0	NV	1	NS	2	NS
Transcription factor: ZF	53	0	NV	1	NS	0	NV	1	NS	11	0.000614415	6	0.0386974
Transcription factor: bHLH	36	0	NV	0	NV	0	NV	0	NV	2	NS	4	NS
Transcription factor: forkhead	14	0	NV	1	NS	0	NV	0	NV	1	NS	3	0.0332432
[truncated: 35 more rows]

## Sheet: F. Cat3
Category 3	Count	control.up_RGS	control.up_PValue	sams1.up_RGS	sams1.up_PValue	sams4.up_RGS	sams4.up_PValue	control.down_RGS	control.down_PValue	sams1.down_RGS	sams1.down_PValue	sams4.down_RGS	sams4.down_PValue
[truncated: 471 more rows]
