# Supplementary figures and images for: S-adenosylmethionine synthases specify distinct H3K4me3 populations and gene expression patterns during heat stress
Source: eLife journal article supplement (doi:10.7554/elife.79511), 2023-02-09

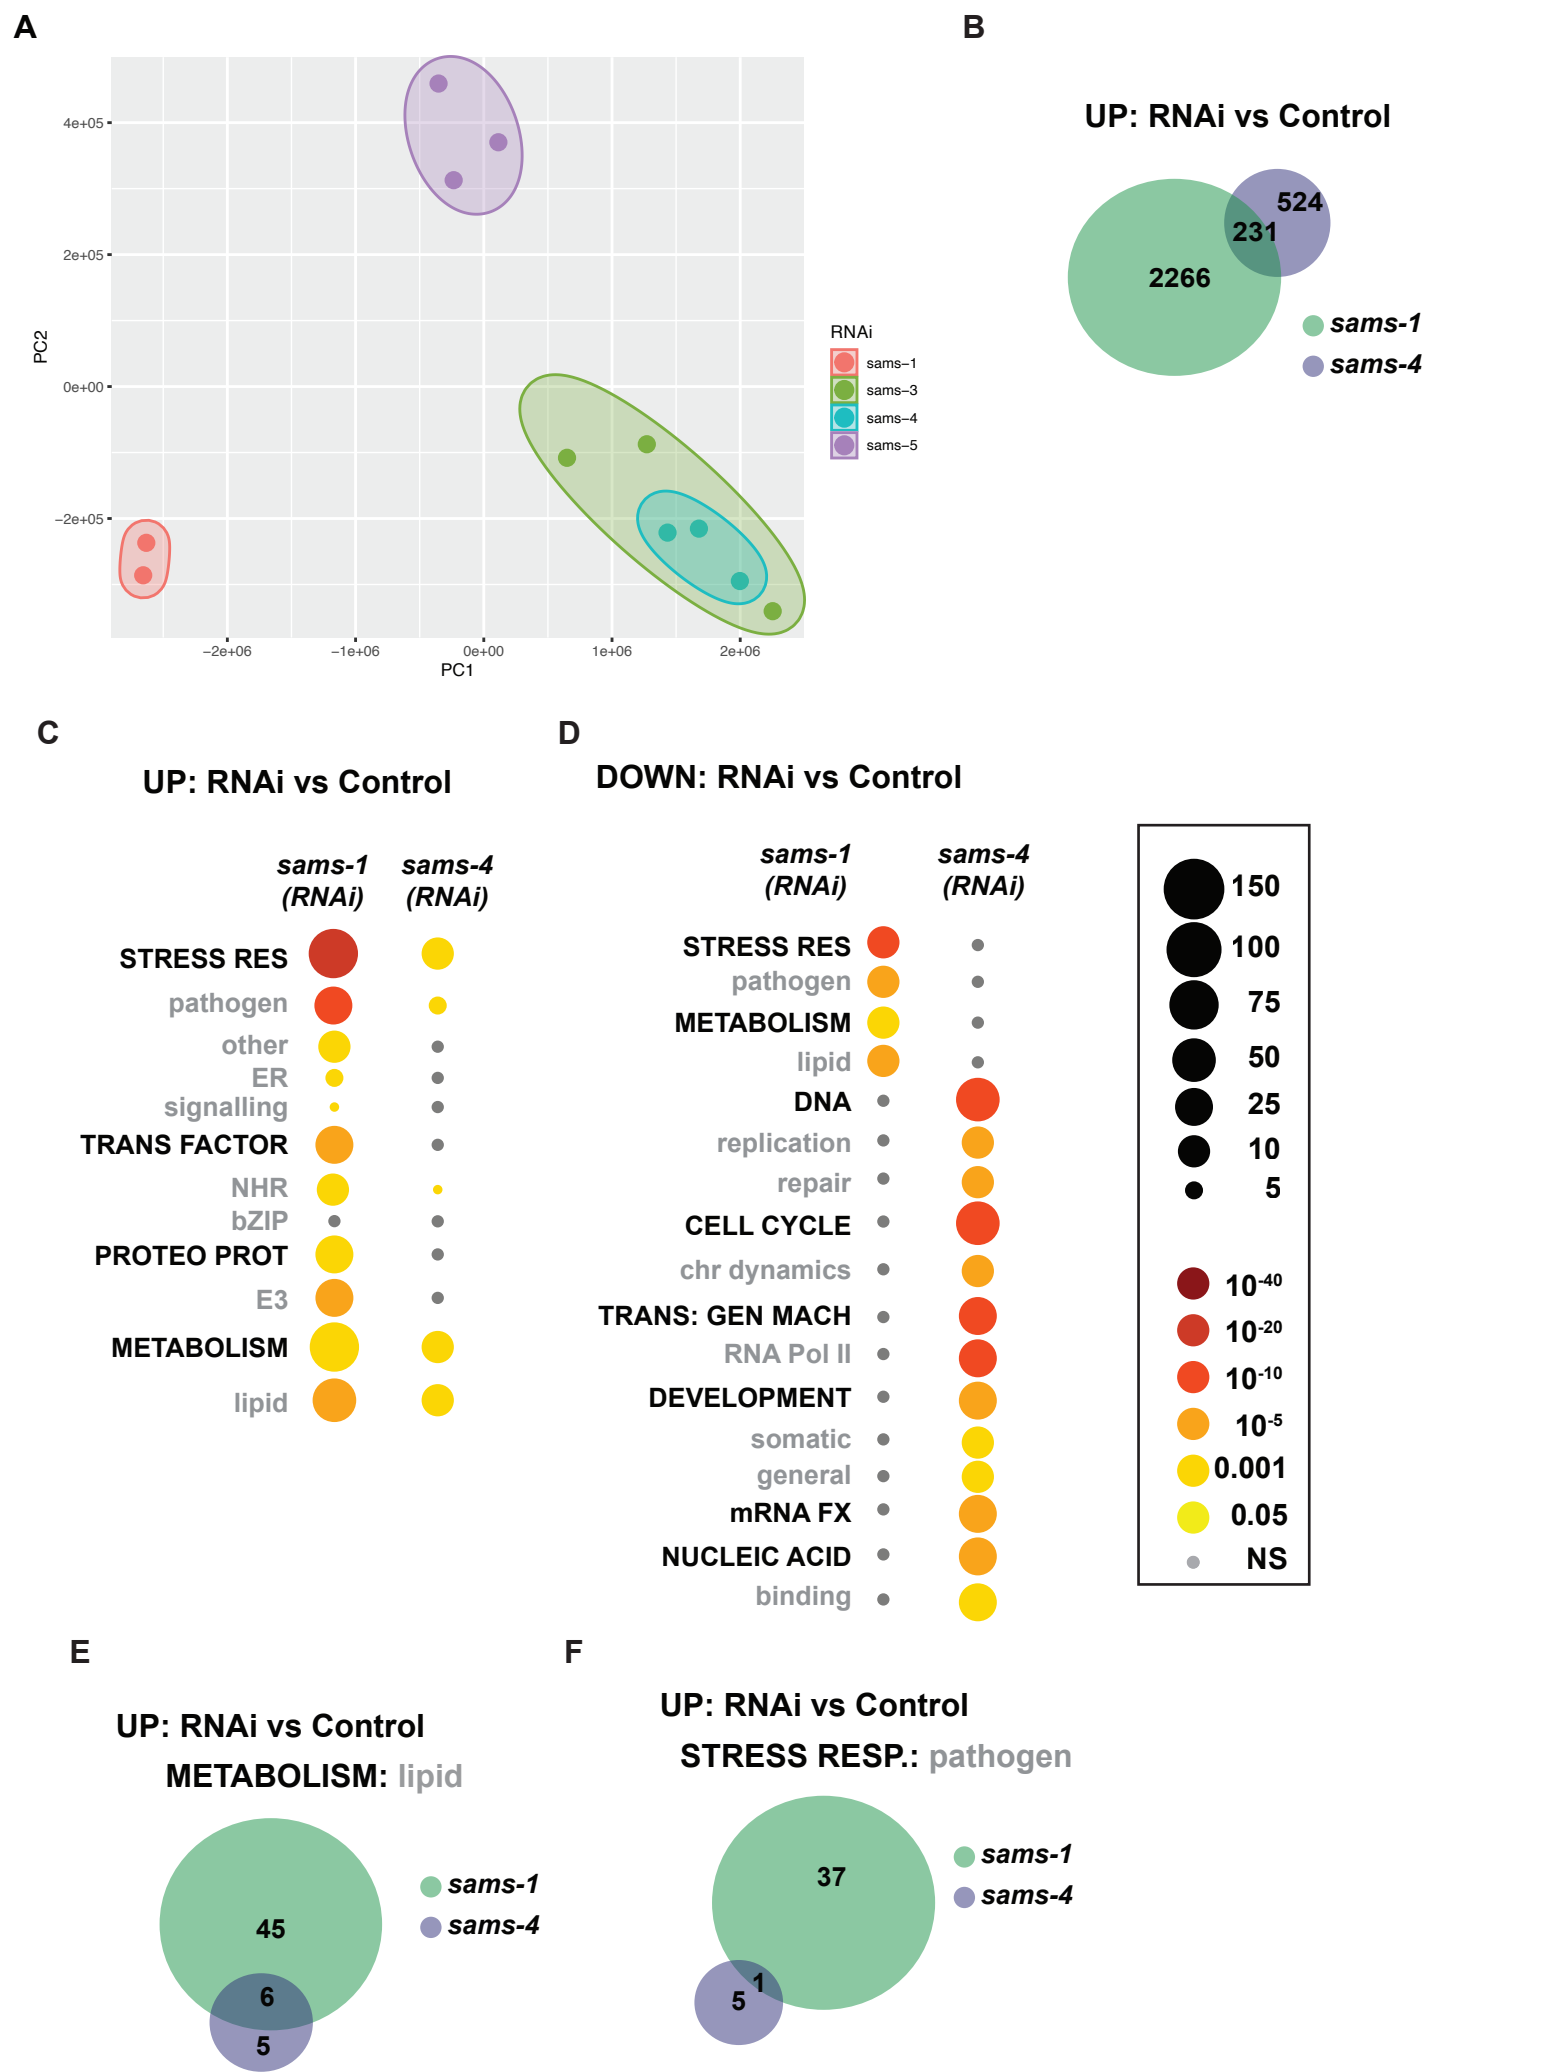

Supplement: supp [file elife-79511-supp-v1.zip]

**A**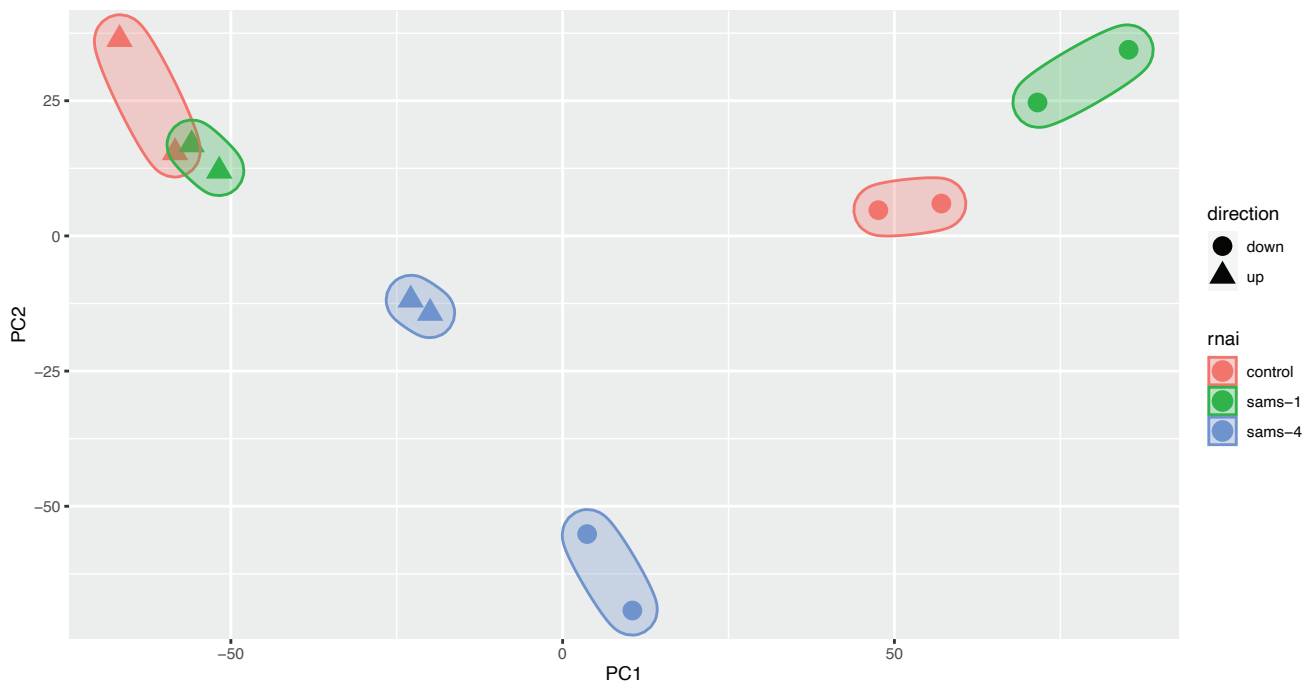**B*****T27F6.8* heat shock**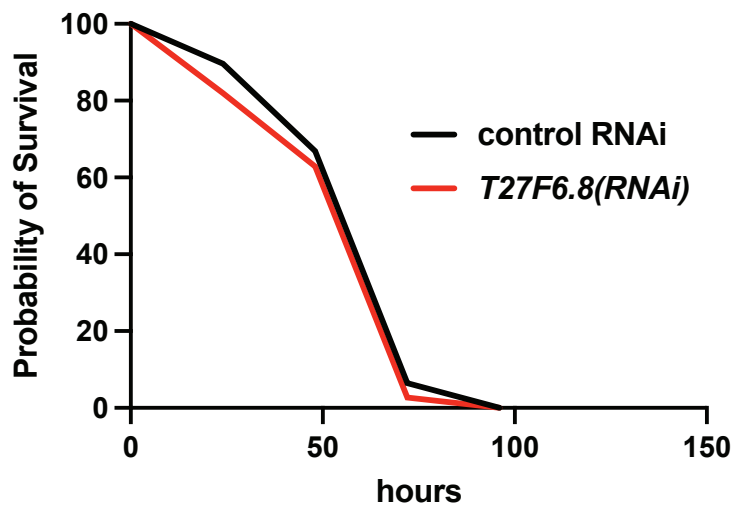**C*****fbxa-59* heat shock**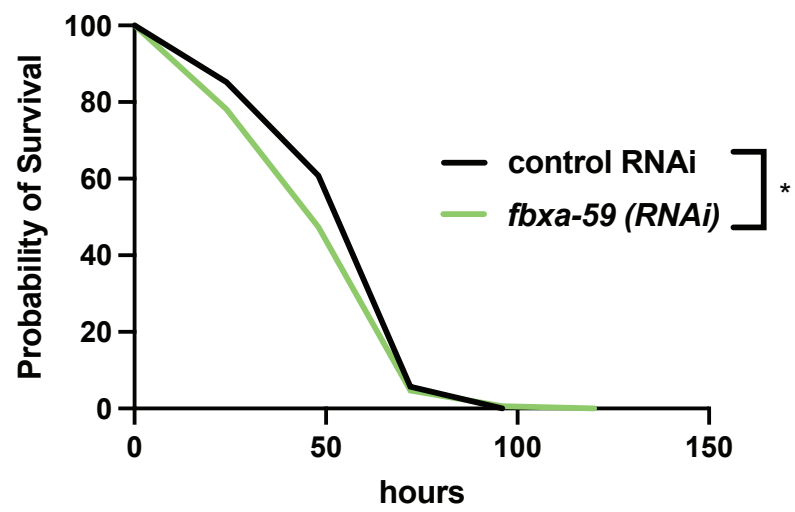

Supplement: supp [file elife-79511-supp-v1.zip]

A

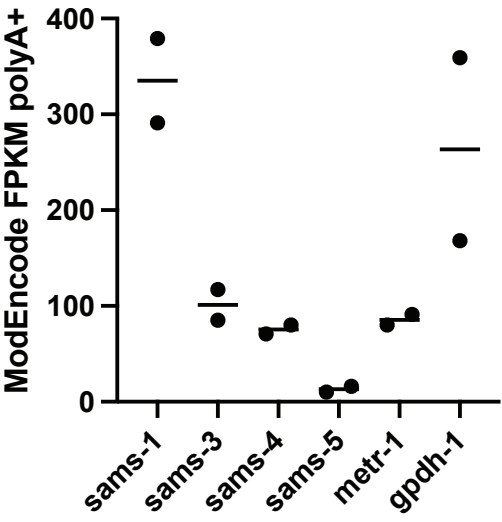

B

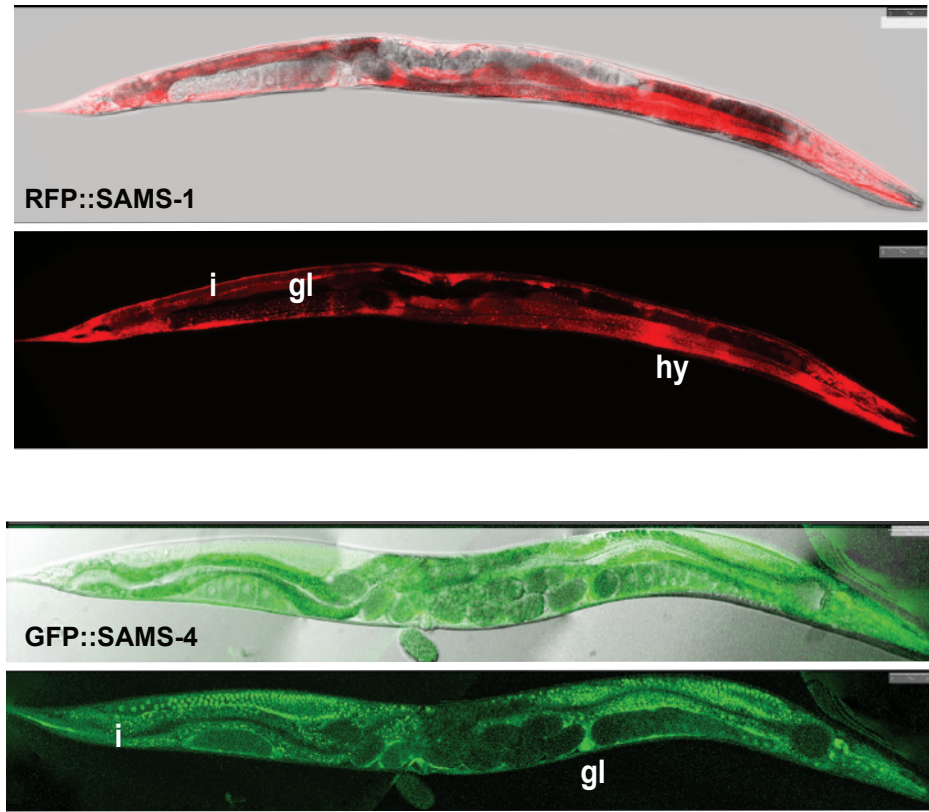

C

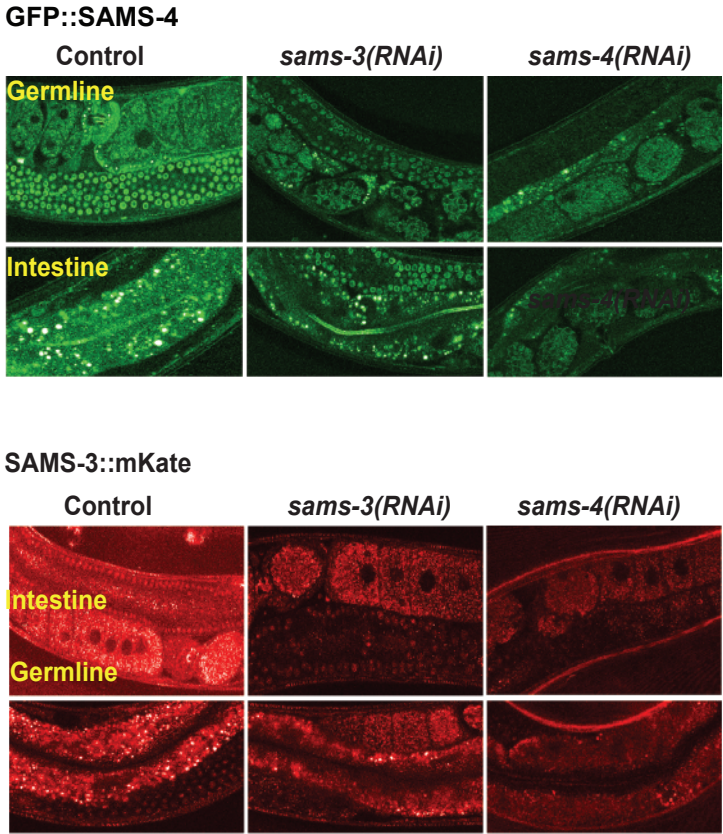

D

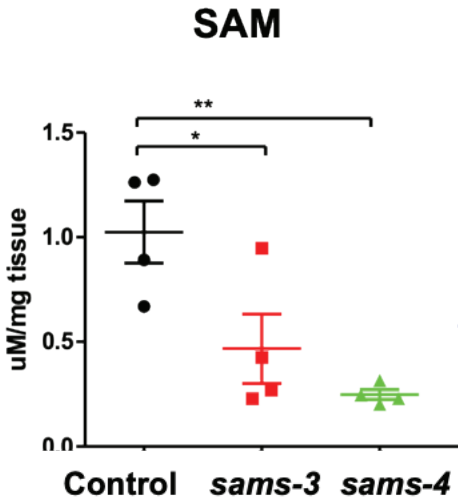

Supplement: supp [file elife-79511-supp-v1.zip]

A

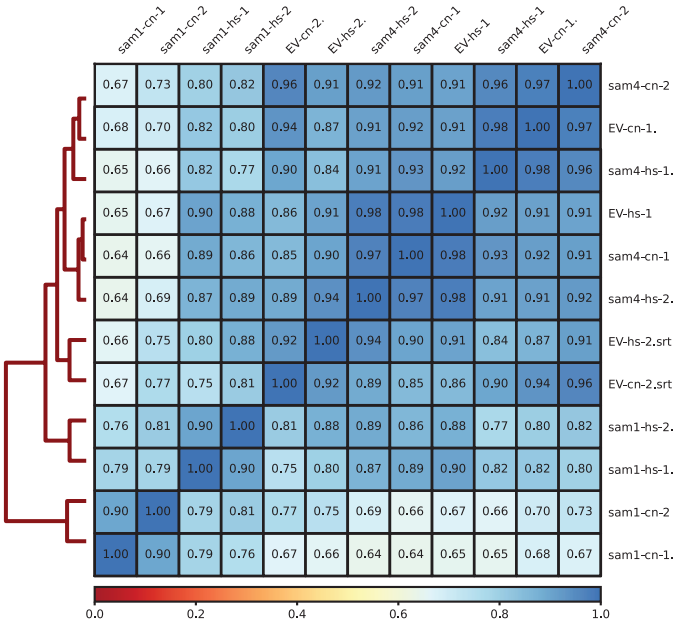

B

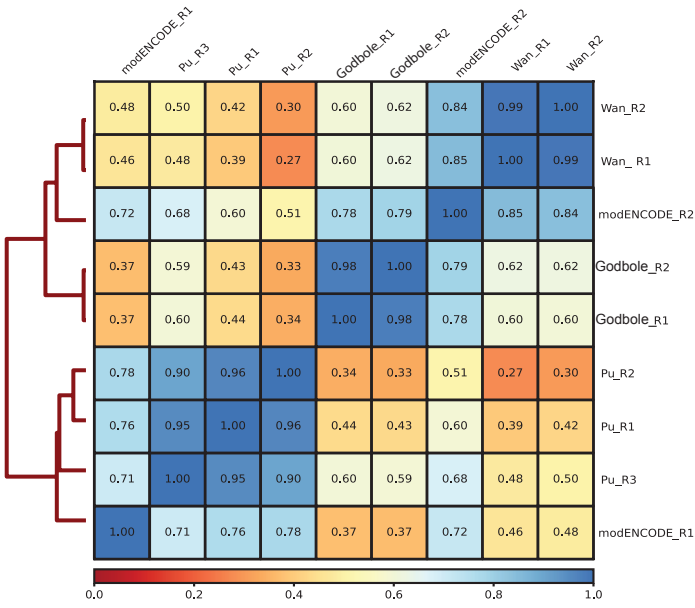

C

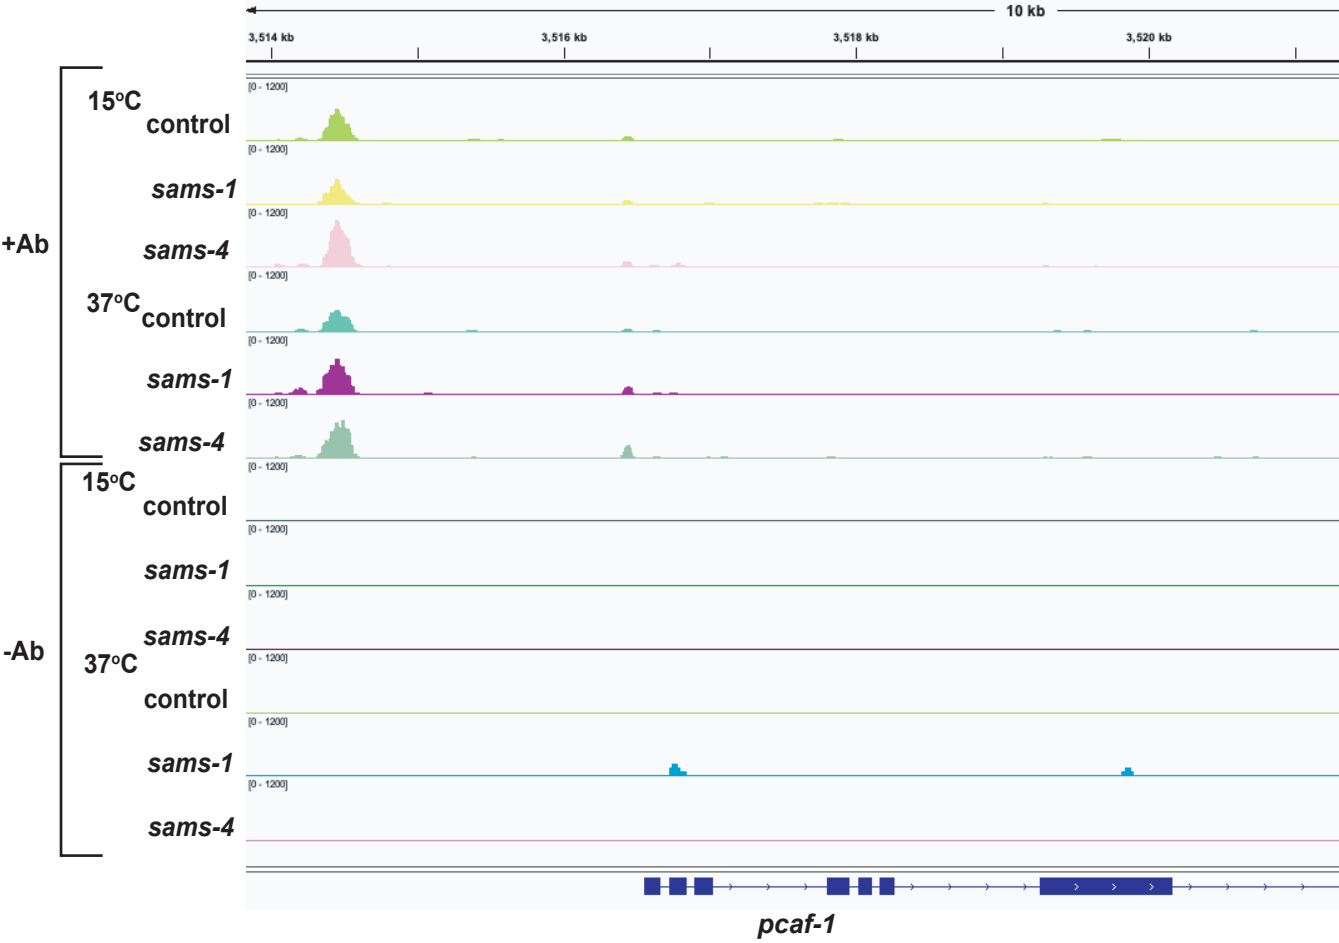

Supplement: supp [file elife-79511-supp-v1.zip]

A

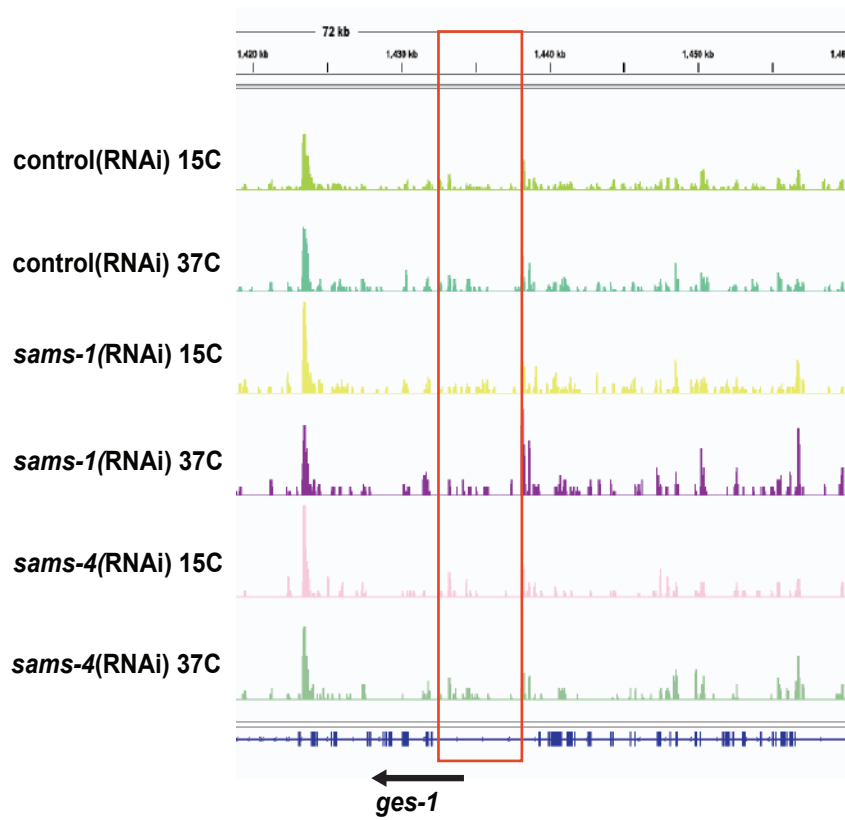

B

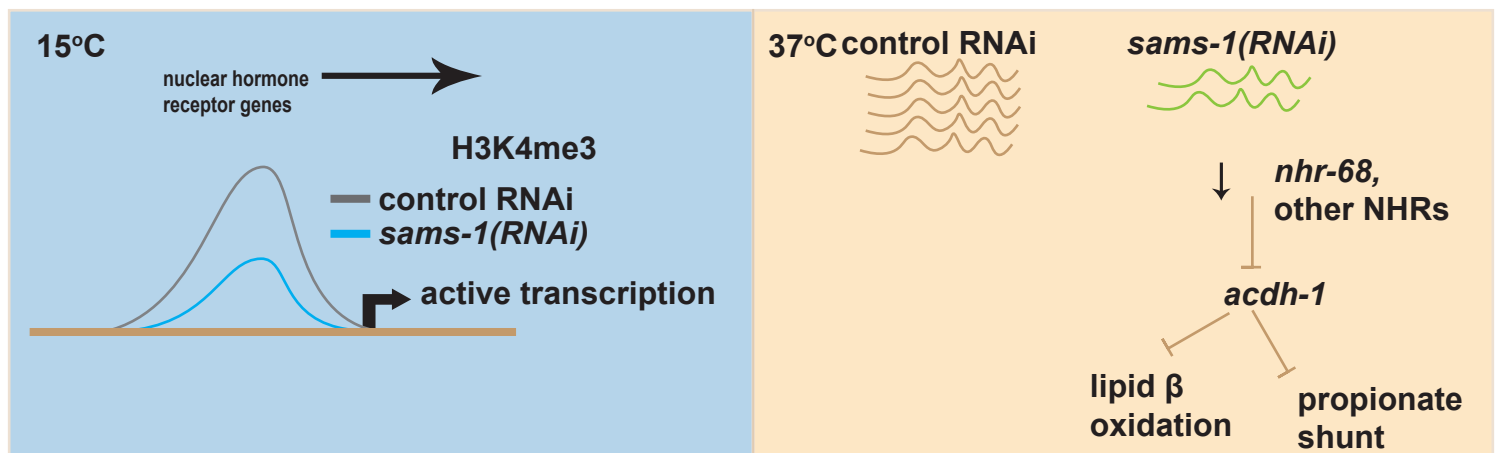

Supplement: supp [file elife-79511-supp-v1.zip]

A

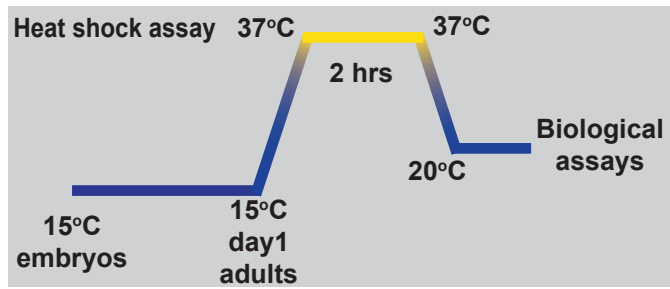

B

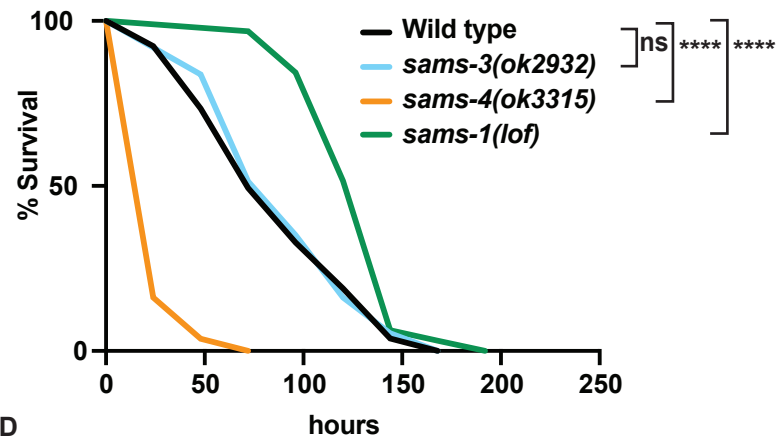

C

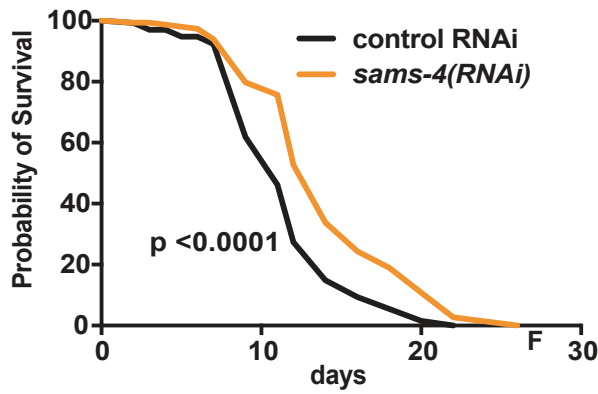

D

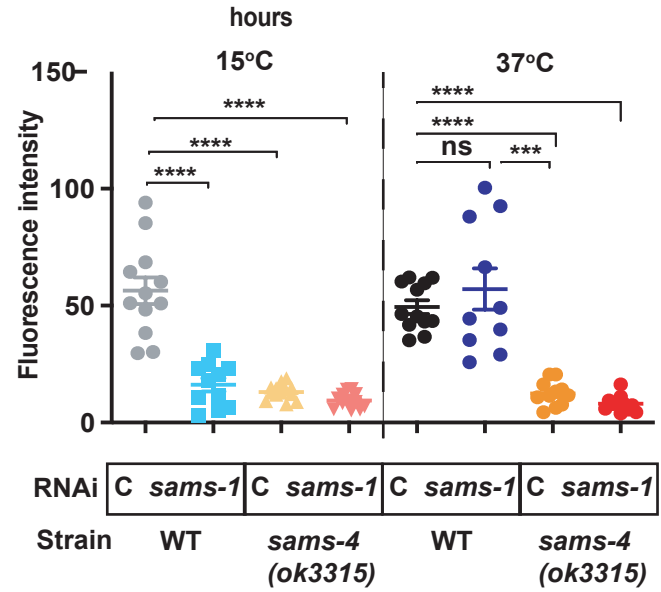

E

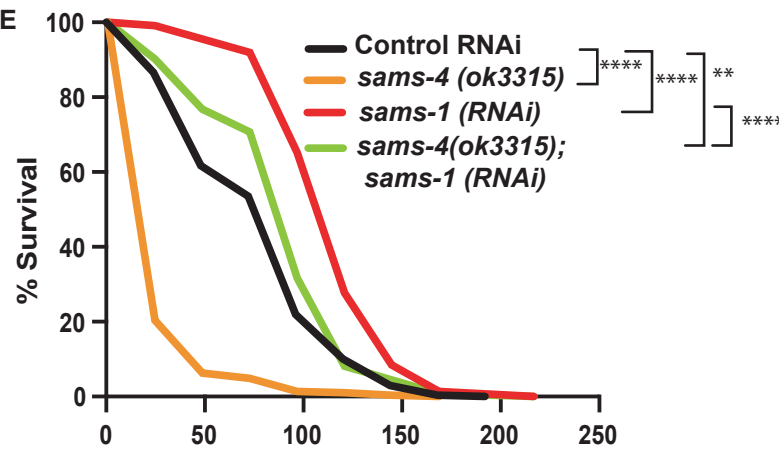

F

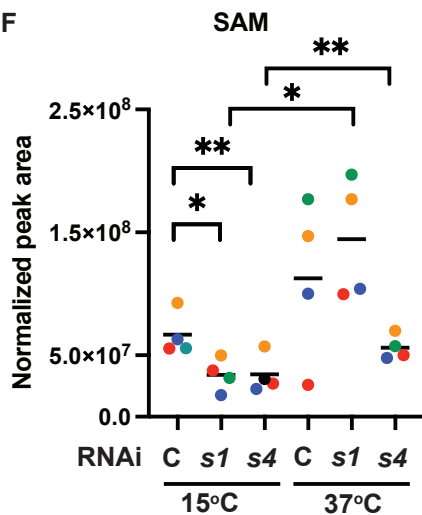

G

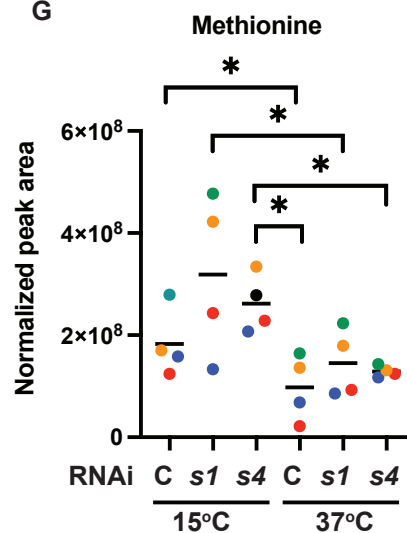

H

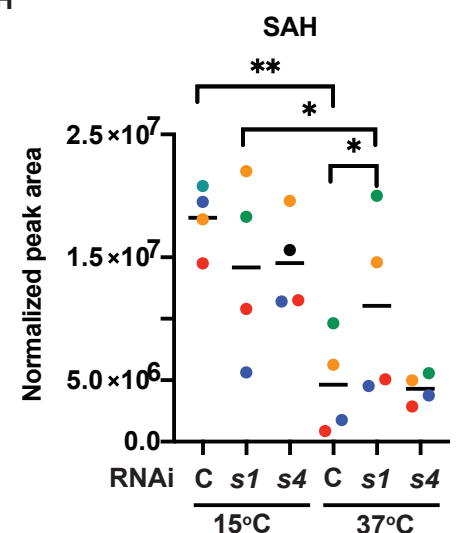

Supplement: supp [file elife-79511-supp-v1.zip]

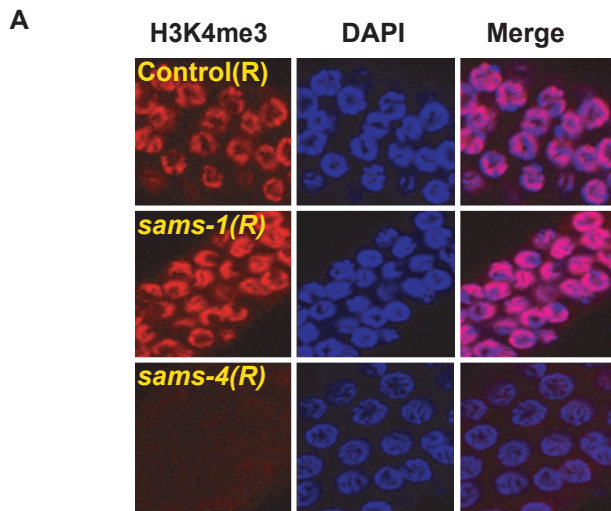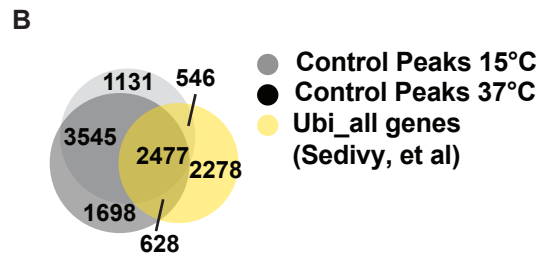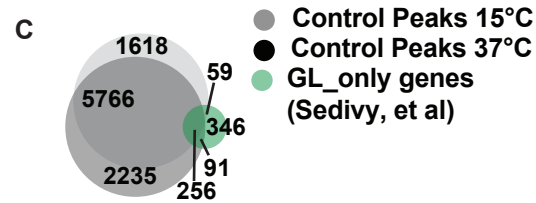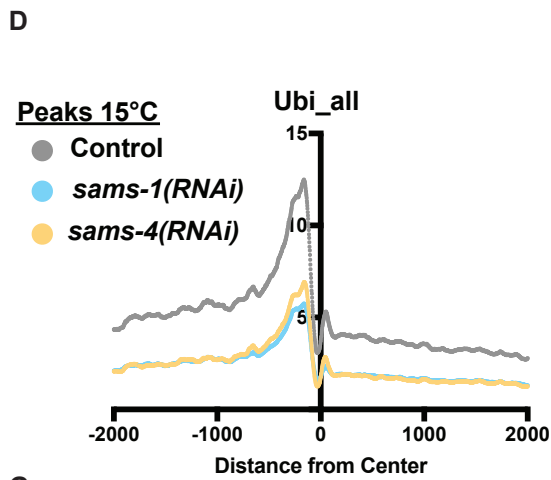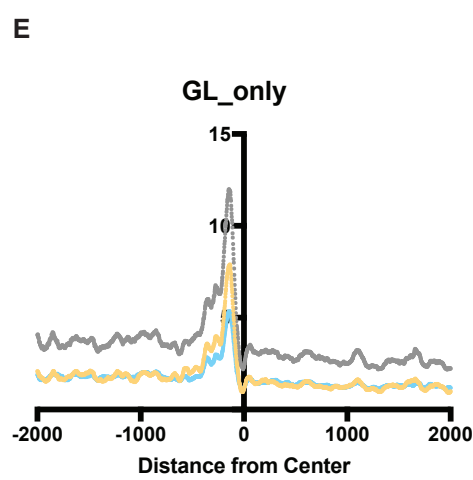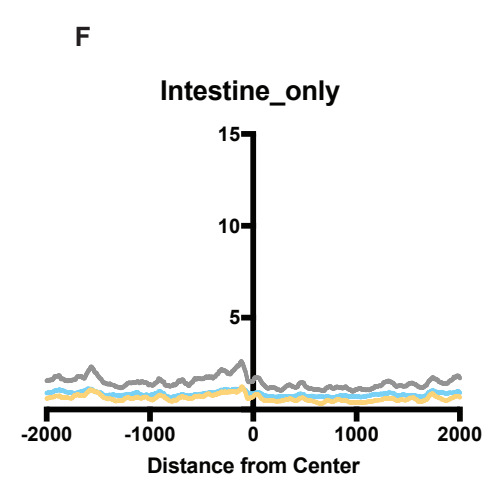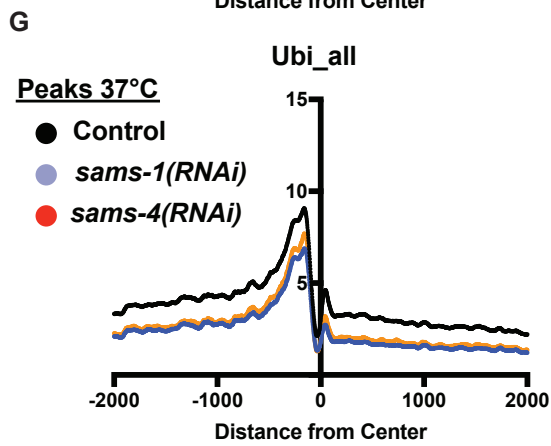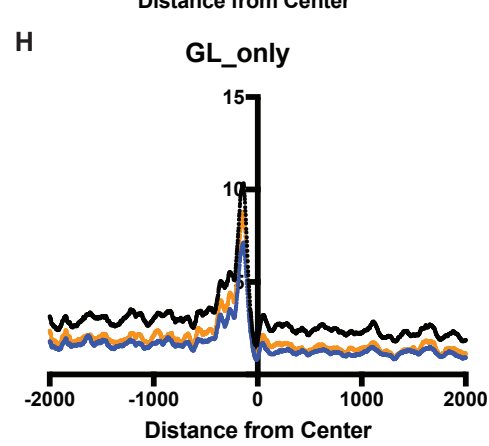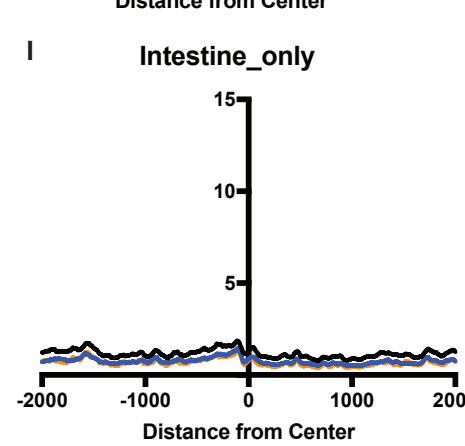

Supplement: supp [file elife-79511-supp-v1.zip]

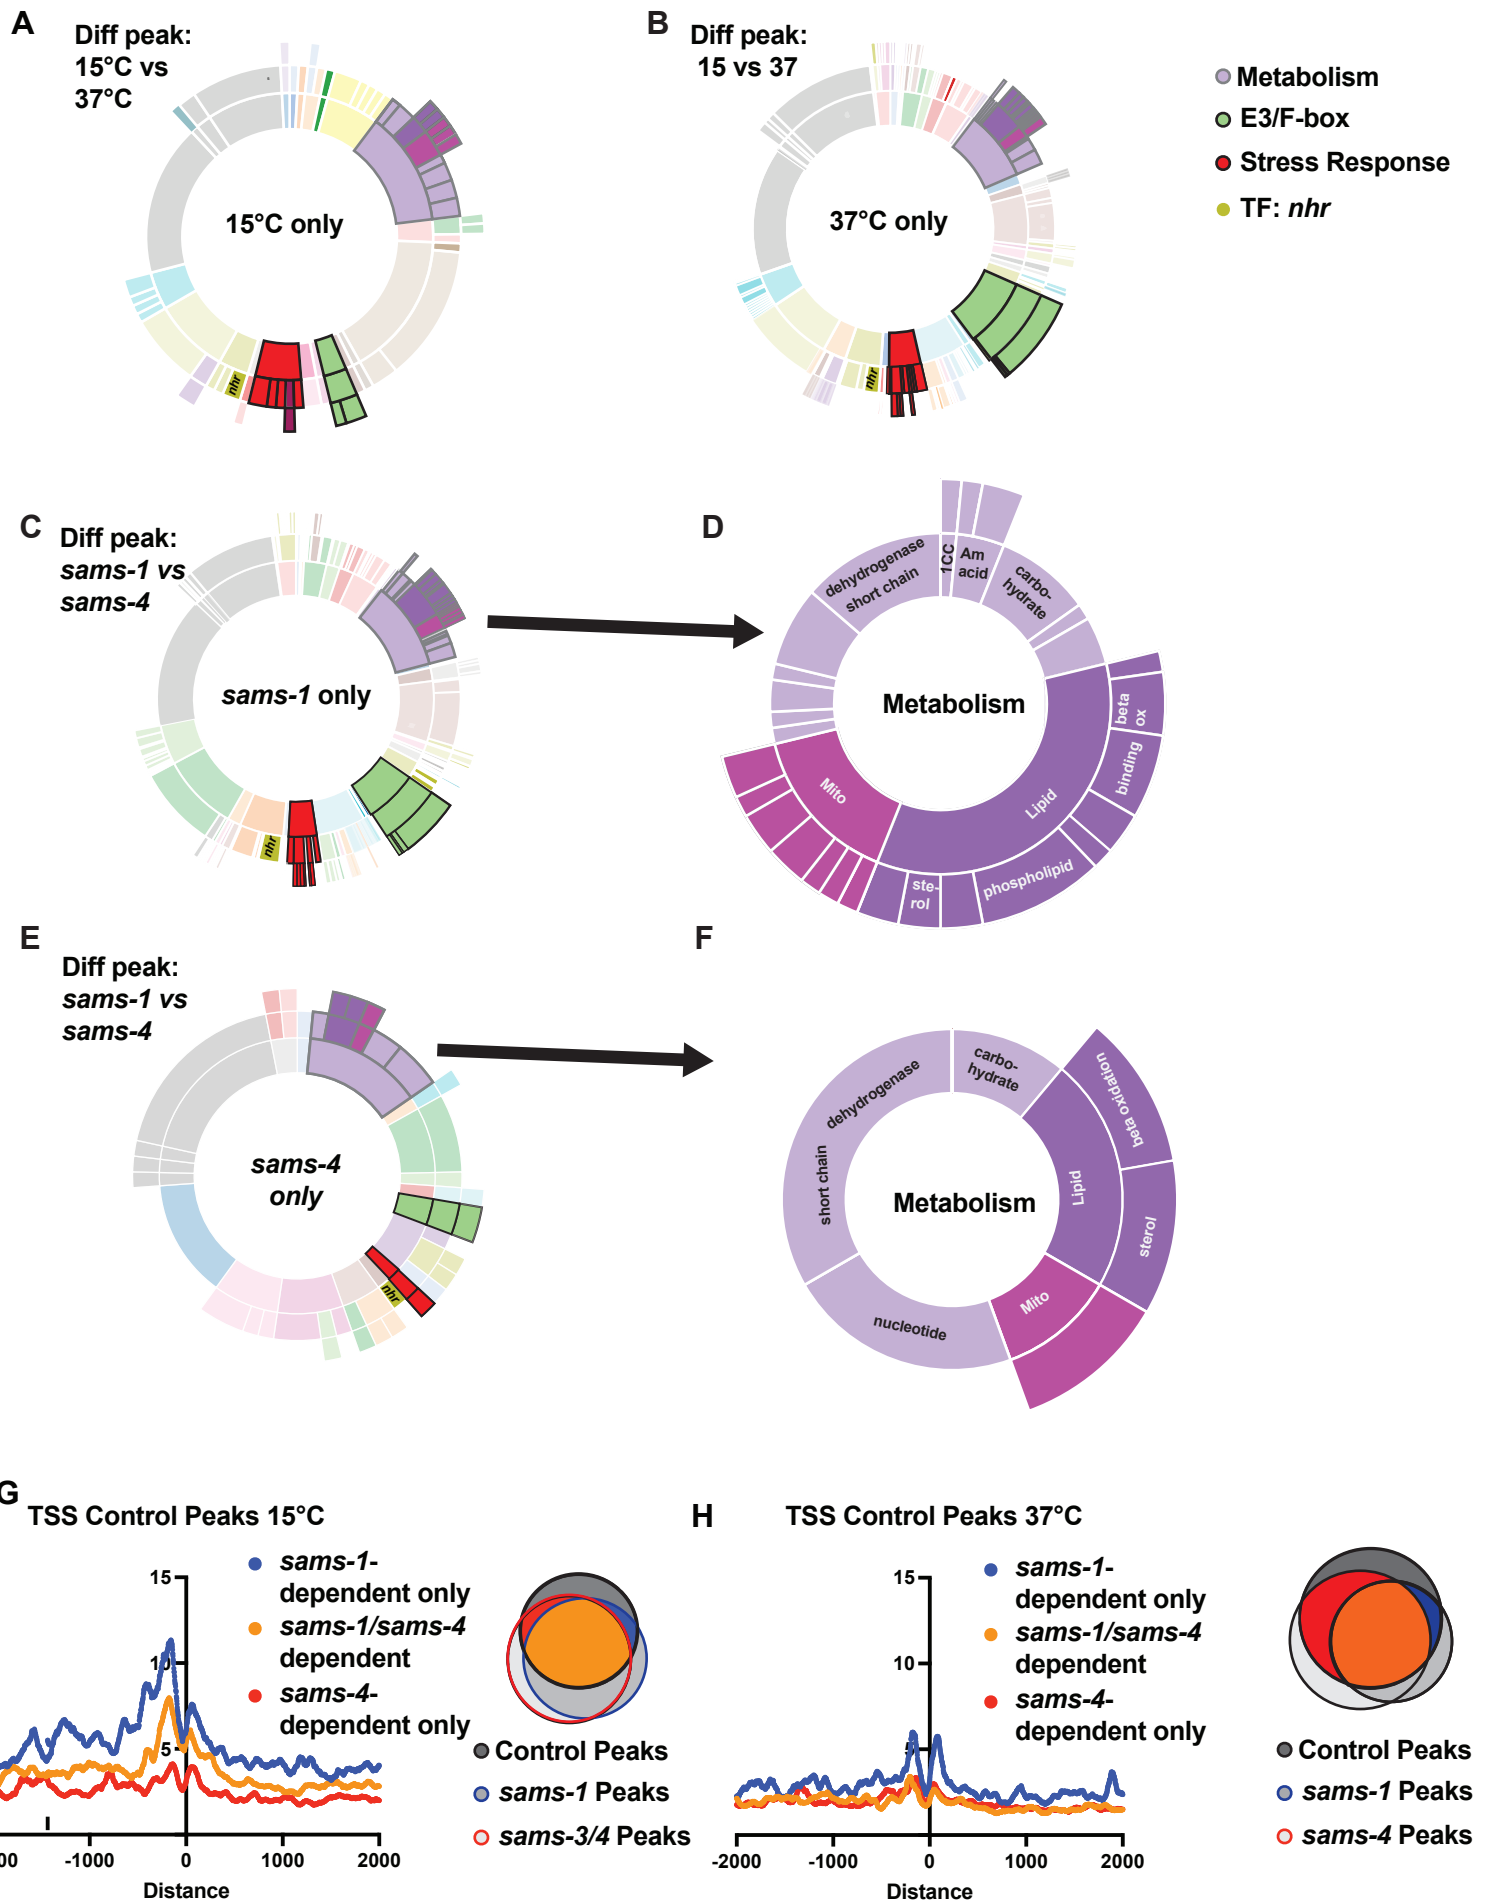

Supplement: supp [file elife-79511-supp-v1.zip]

A

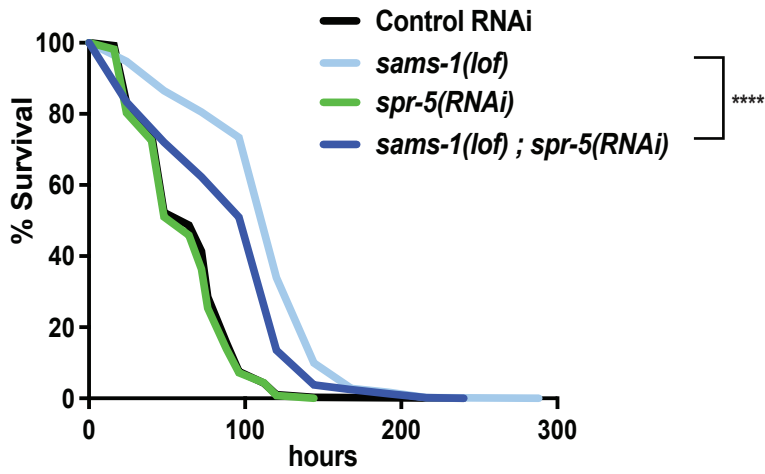

D

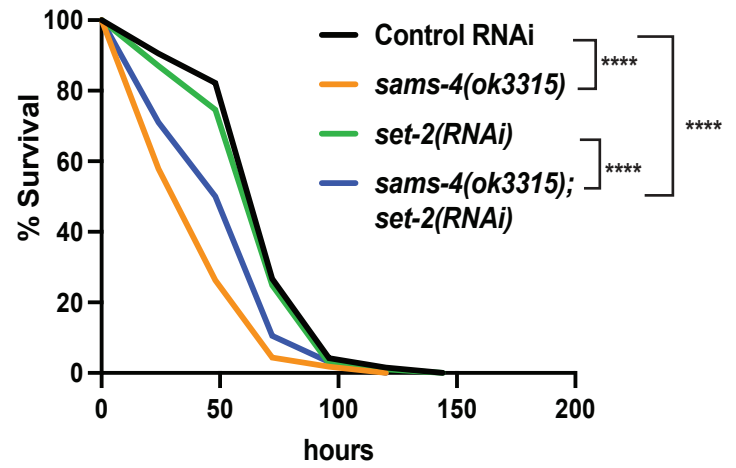

B

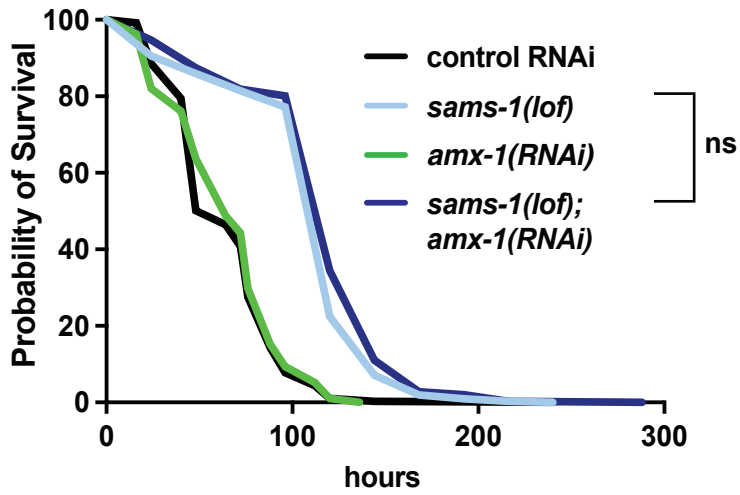

E

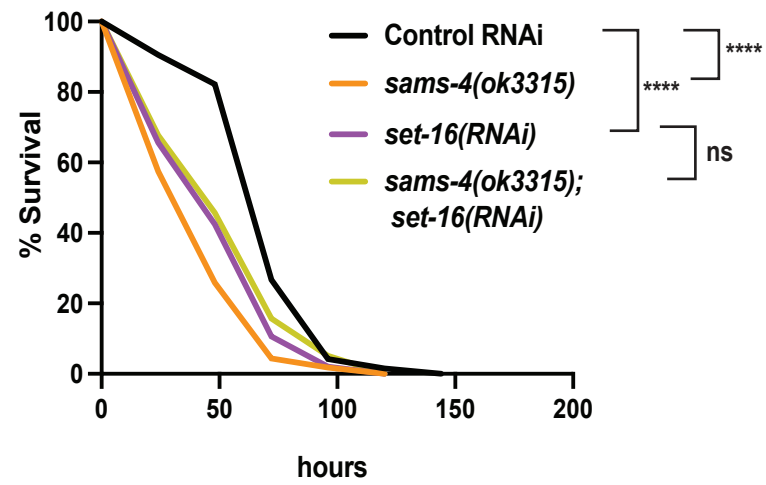

C

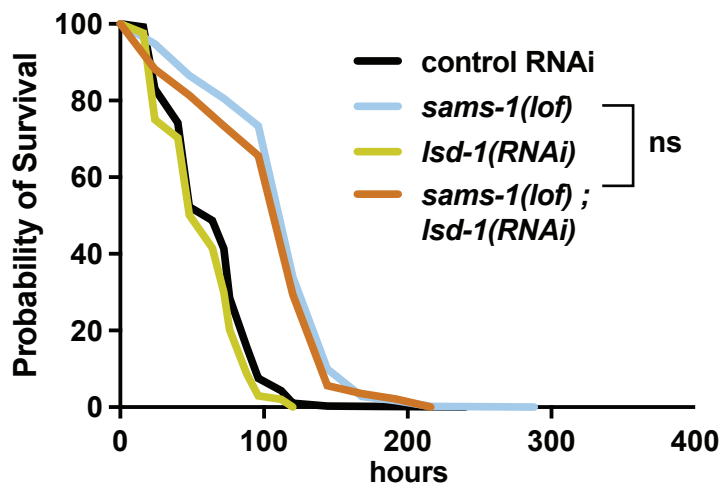

Supplement: supp [file elife-79511-supp-v1.zip]
